# Supplementary material
Source: PubMed Central journal article supplement (PMC3849157)
Supplement: rna-10-1093-s01.pdf [file rna-10-1093-s01.pdf]

## **Supplemental Material to:**

**Elena Miñones-Moyano, Marc R. Friedländer, Joan Pallares,  
Birgit Kagerbauer, Sílvia Porta, Georgia Escaramís,  
Isidre Ferrer, Xavier Estivill, Eulàlia Martí**

**Upregulation of a small vault RNA (svtRNA2-1a)  
is an early event in Parkinson's disease and  
induces neuronal dysfunction**

**2013; 10(6)**

**<http://dx.doi.org/10.4161/rna.24813>**

**[www.landesbioscience.com/journals/rnabiology/article/24813/](http://www.landesbioscience.com/journals/rnabiology/article/24813/)**

Supl. Fig. 1

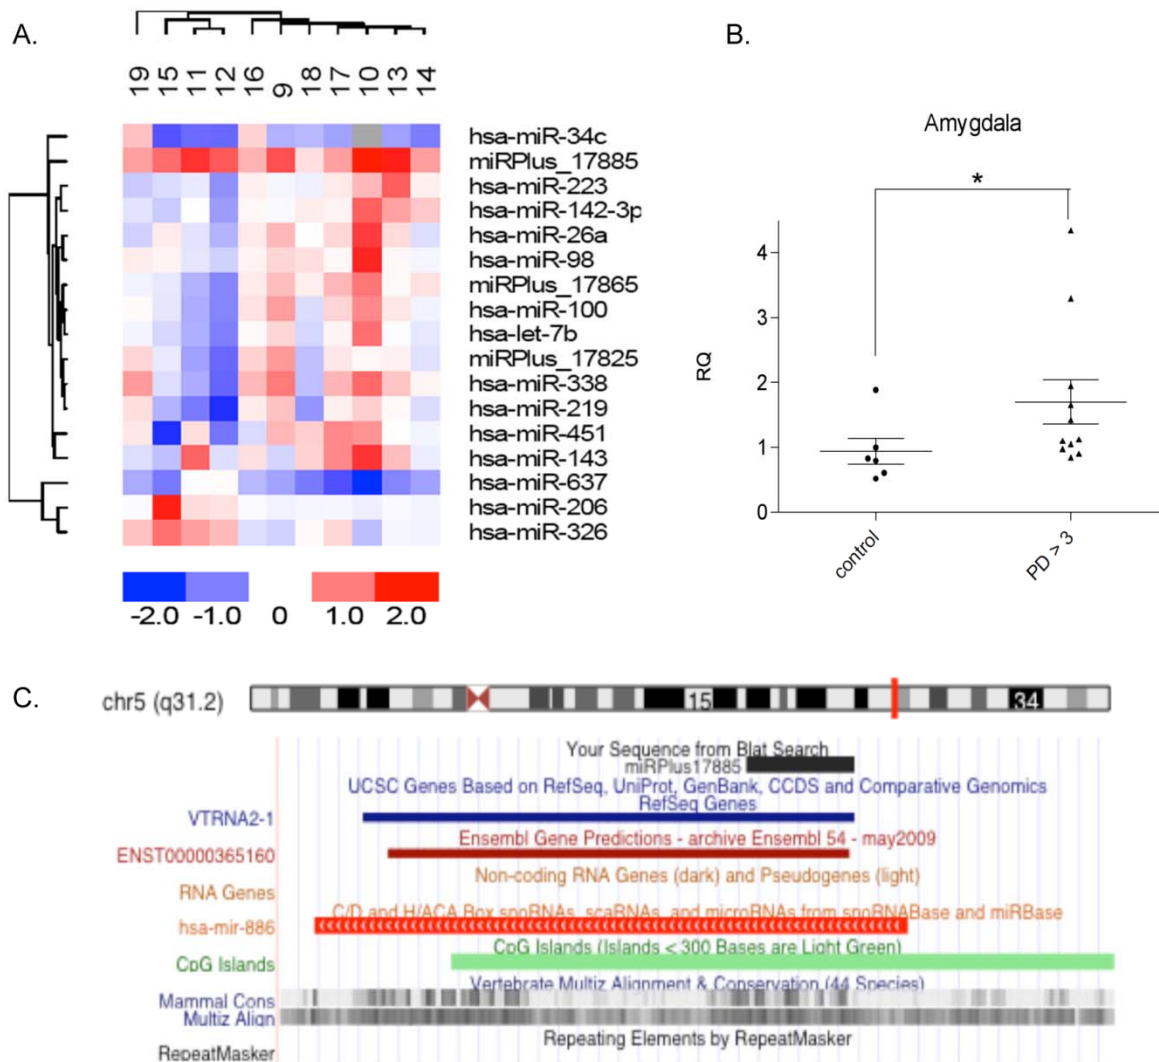

Supl.Fig.1. MiRNA microarrays heat map and rRT-PCR validation. A. Heat map showing deregulated miRNAs in AM samples from 11 individual PD patients compared to a pool made of equitable quantities of total RNA of 6 individual control AM (listed in supl.Table 1). MiRNA up-regulation is indicated in red and downregulation in blue. B. svtRNA2-1a (miRPlus\_17885) expression levels in the same samples by RT-PCR, using RNU6B as the reference snRNA. RQ represents relative expression levels of svtRNA2-1a in AM samples from PD patients vs. control individuals. Plot shows individual and mean RQ values  $\pm$  SEM (\*,  $p < 0,05$ ; using a LMM). C. Genomic location of svtRNA2-1a (miRPlus\_17885) in chromosome 5 (USCS genome browser)

## Supl. Fig. 2

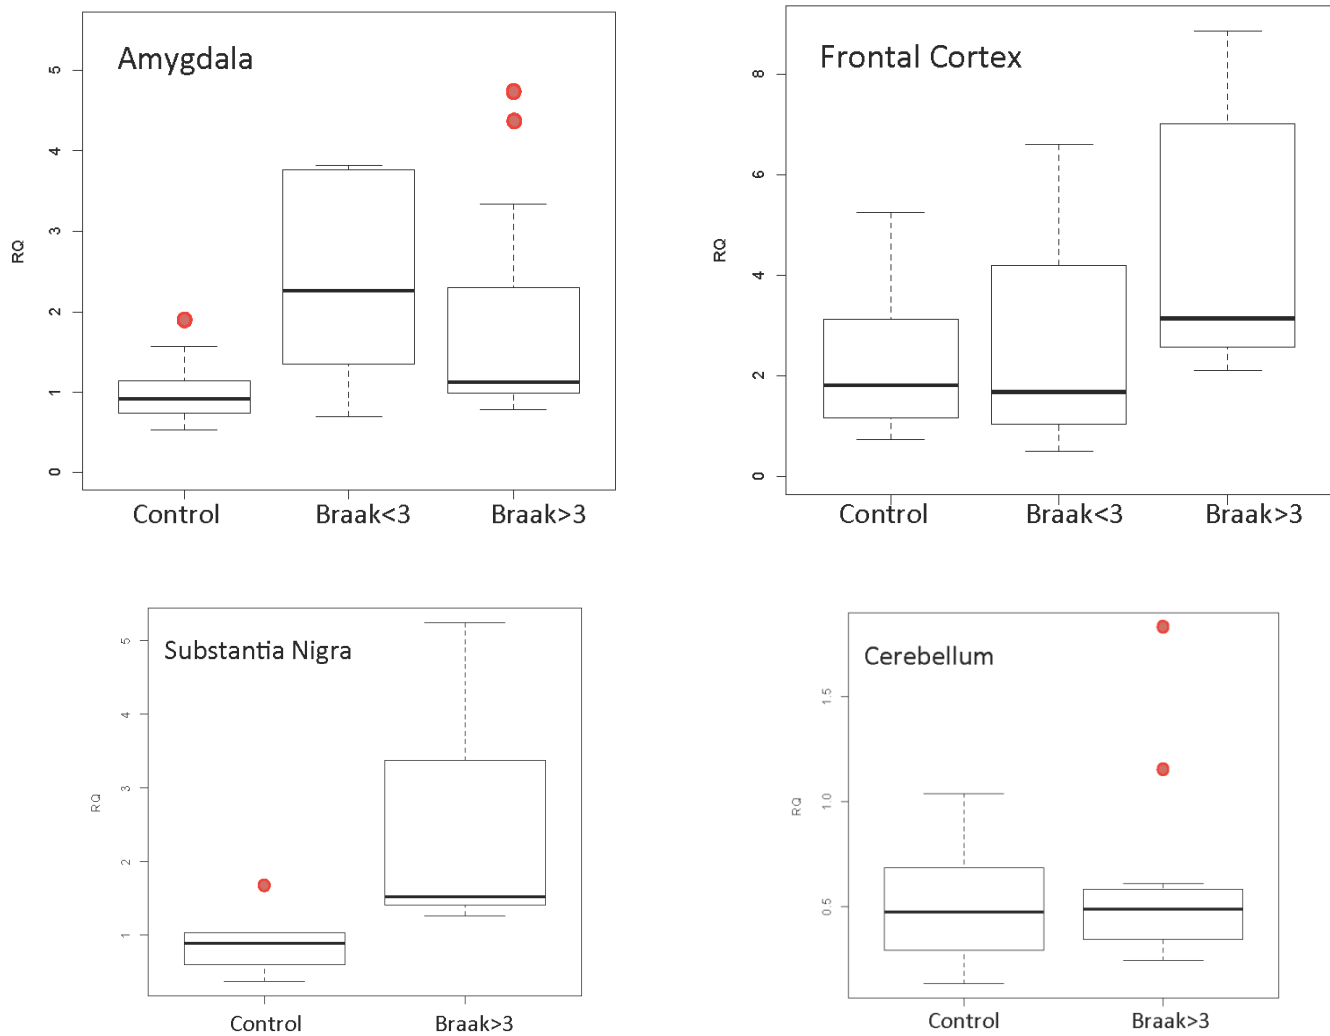

| LMM analysis              | All samples |        | Without outliers |        |
|---------------------------|-------------|--------|------------------|--------|
|                           | FC          | P      | FC               | P      |
| AM<br>Control vs Braak >3 | 1,48        | 0,0014 | 1,64             | <2e-4  |
| AM<br>Control vs Braak <3 | 2,24        | <2e-4  | 2,09             | <2e-4  |
| FC<br>Control vs Braak >3 | 2,14        | <2e-4  | -                | -      |
| FC<br>Control vs Braak <3 | 1,03        | 0,8136 | -                | -      |
| SN<br>Control vs Braak >3 | 2,63        | <2e-4  | 3,03             | <2e-4  |
| CB<br>Control vs Braak >3 | 1,15        | 0,1784 | 0,91             | 0,3284 |

| REST analysis             | All samples |        | Without outliers |        |
|---------------------------|-------------|--------|------------------|--------|
|                           | FC          | P      | FC               | P      |
| AM<br>Control vs Braak >3 | 1,68        | 0,032  | 1,51             | 0,0335 |
| AM<br>Control vs Braak <3 | 2,12        | 0,011  | 2,23             | 0,075  |
| FC<br>Control vs Braak >3 | 2,26        | 0,001  | -                | -      |
| FC<br>Control vs Braak <3 | 1,00        | 0,982  | -                | -      |
| SN<br>Control vs Braak >3 | 2,63        | 0,009  | 3,01             | 0,002  |
| CB<br>Control vs Braak >3 | 1,16        | 0,5625 | 1,089            | 0,7260 |

Supl. Figure 2. Box plot analysis of the RQ in each dataset. Red dots label outlier samples, defined as RQ values beyond 1,5 times the interquartile range away from either the first or third quartile. Statistical analyses of the differences between controls and motor-PD or premotor-PD are shown, using all samples or removing outliers.

Supl. Fig. 3

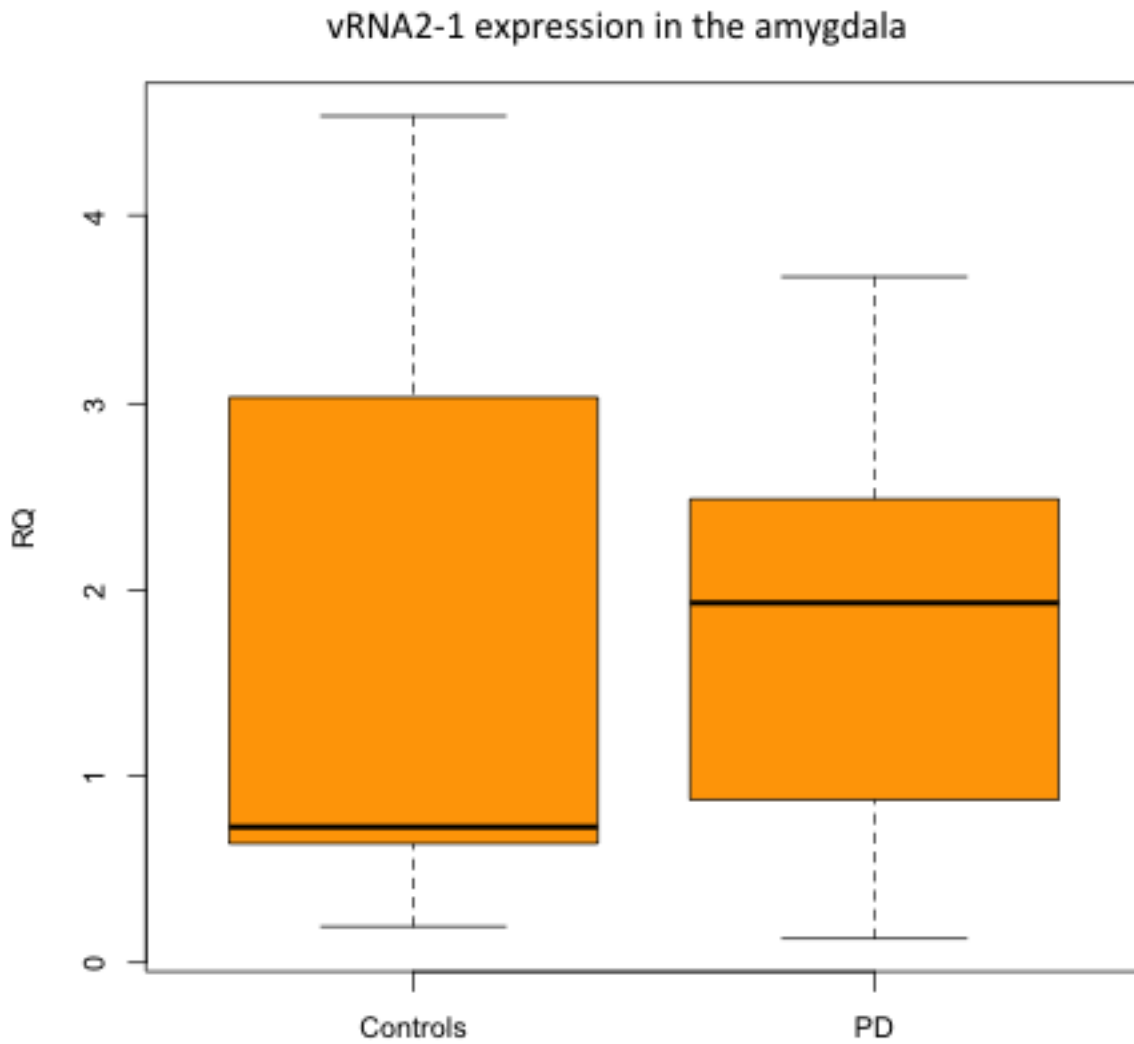

Supl. Fig. 3. vtRNA2-1 expression levels in the amygdala of motor cases (Braak stages >3) of PD patients.. Relative expression for vtRNA2-1 was assessed by rRT-PCR, plots show mean RQ  $\pm$  SEM.

miRBase precursor : hsa-mir-886  
 Total read count : 459707  
 hsa-miR-886 read count : 421860  
 hsa-miR-886\* read count : 35640  
 remaining reads : 2207

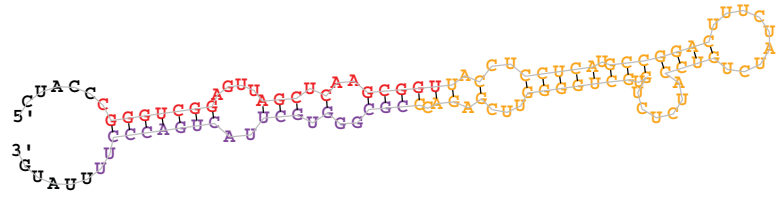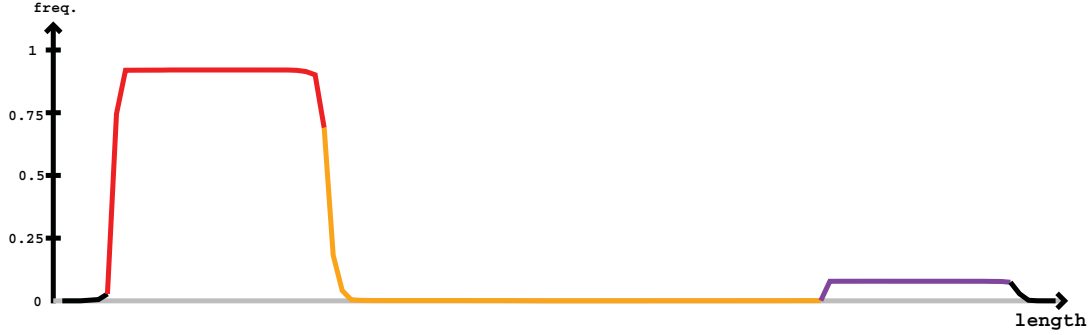

| 5' | hsa-miR-886                                                                          | hsa-miR-886*            | -3' | exp | reads | mm | sample |
|----|--------------------------------------------------------------------------------------|-------------------------|-----|-----|-------|----|--------|
| 5' | cuaccgggucggaguuagcucaagcgguuaccuccuacugccggacuucuaucuguccaucucugucgugguuagcagaccg   | cggggucuuacugaccuuuuaug | -3' | exp | reads | mm | sample |
|    | ..... (((((((..... ((((. ((..... (((((((.....)))).....))))).....))))).....)))))..... |                         |     |     | 2     | 0  | yal    |
|    | ..accgggucggaguuagcucaagc.....                                                       |                         |     |     | 1     | 0  | yal    |
|    | ..accgggucggaguuagcucaagcgg.....                                                     |                         |     |     | 8     | 0  | yal    |
|    | ..accgggucggaguuagcucaagcgggu.....                                                   |                         |     |     | 4     | 0  | yal    |
|    | ..accgggucggaguuagcucaagcgguu.....                                                   |                         |     |     | 1     | 0  | yal    |
|    | ..cccgggucggaguuagcucaag.....                                                        |                         |     |     | 1     | 0  | yal    |
|    | ..cccgggucggaguuagcucaagcgg.....                                                     |                         |     |     | 2     | 0  | yal    |
|    | ..cccgggucggaguuagcucaagcgggu.....                                                   |                         |     |     | 1     | 0  | yal    |
|    | ..ccgggucggaguuagcucaagc.....                                                        |                         |     |     | 1     | 0  | yal    |
|    | ..ccgggucggaguuagcucaagcgg.....                                                      |                         |     |     | 13    | 0  | yal    |
|    | ..Ucgggucggaguuagcucaagcgg.....                                                      |                         |     |     | 1     | 1  | yal    |
|    | ..ccgggucggaguuagcucaagcgggu.....                                                    |                         |     |     | 2     | 0  | yal    |
|    | ..ccgggucggaguuagcucaagcggA.....                                                     |                         |     |     | 1     | 1  | yal    |
|    | ..ccgggucggaguuagcucaagcgguu.....                                                    |                         |     |     | 3     | 0  | yal    |
|    | ..cgggucggaguuagcucaagc.....                                                         |                         |     |     | 4     | 0  | yal    |
|    | ..cgggucggaguuagcucaagc.....                                                         |                         |     |     | 21    | 0  | yal    |
|    | ..cgggucggaguuagcucaagcgc.....                                                       |                         |     |     | 13    | 0  | yal    |
|    | ..cgggucggaguuagcucaaaAcgg.....                                                      |                         |     |     | 1     | 1  | yal    |
|    | ..cgggucggaguuagcucaagcgg.....                                                       |                         |     |     | 1     | 1  | yal    |
|    | ..cgggGcggaguuagcucaagcgg.....                                                       |                         |     |     | 3     | 1  | yal    |
|    | ..Ugggucggaguuagcucaagcgg.....                                                       |                         |     |     | 2     | 1  | yal    |
|    | ..Ggggucggaguuagcucaagcgg.....                                                       |                         |     |     | 2     | 1  | yal    |
|    | ..cgggucggaguuagcucaaaUcgg.....                                                      |                         |     |     | 1     | 1  | yal    |
|    | ..cgggucggaguuagcucaagcggA.....                                                      |                         |     |     | 6     | 1  | yal    |
|    | ..cgggucggaguuagcucaagcgg.....                                                       |                         |     |     | 363   | 0  | yal    |
|    | ..cgggucggaguuagcucUagcgg.....                                                       |                         |     |     | 1     | 1  | yal    |
|    | ..cgggucggaguuagcucCagcgg.....                                                       |                         |     |     | 1     | 1  | yal    |
|    | ..cggUcggaguuagcucaagcgg.....                                                        |                         |     |     | 1     | 1  | yal    |
|    | ..cgggucggaguuagcucaagcggU.....                                                      |                         |     |     | 2     | 1  | yal    |
|    | ..Agggucggaguuagcucaagcgg.....                                                       |                         |     |     | 2     | 1  | yal    |
|    | ..cgggucggaaUuagcucaagcgggu.....                                                     |                         |     |     | 1     | 1  | yal    |
|    | ..cgggucggaguuagcucaagGgggu.....                                                     |                         |     |     | 1     | 1  | yal    |
|    | ..cggUcggaguuagcucaagcgggu.....                                                      |                         |     |     | 1     | 1  | yal    |
|    | ..cgggucggaguuagcucaaaUcgggu.....                                                    |                         |     |     | 1     | 1  | yal    |

cuaccgggucgggaguuagcucaagcgguuaccuccuacugcgggacuuucuaucuguccaucucugugcgggguuucgagaccgcgggugcuuacugaccuuuuuag

|                                        |     |   |     |
|----------------------------------------|-----|---|-----|
| .....cgCgucgggaguuagcucaagcgggu.....   | 1   | 1 | yal |
| .....cgggucgggaguuagcucaagcgggu.....   | 217 | 0 | yal |
| .....cgggGcggaguuagcucaagcgggu.....    | 3   | 1 | yal |
| .....cgggucgggaguuagcucaagcggG.....    | 1   | 1 | yal |
| .....cgggucgggaguuagcucaagcggGA.....   | 7   | 1 | yal |
| .....cggguUggaguuagcucaagcgggu.....    | 1   | 1 | yal |
| .....cgggucgggaguuUcucagcgggu.....     | 1   | 1 | yal |
| .....cgggucgggaguuagcuGaaagcgggu.....  | 1   | 1 | yal |
| .....cgggucgggaguuagcucaUgcgggu.....   | 1   | 1 | yal |
| .....cgggucgggaguuagcuUaaagcgggu.....  | 1   | 1 | yal |
| .....cgggucgggaguuagcucaagcggguC.....  | 1   | 1 | yal |
| .....cgggucgggaguuagcucaagcggGU.....   | 2   | 1 | yal |
| .....cgggucgggaguuagcucaaUcgggu.....   | 1   | 1 | yal |
| .....cggguUggaguuagcucaagcgggu.....    | 1   | 1 | yal |
| .....Ggggucgggaguuagcucaagcgggu.....   | 1   | 1 | yal |
| .....cggUucgggaguuagcucaagcgggu.....   | 2   | 1 | yal |
| .....cgggucgggaguuagcucaagcgggu.....   | 37  | 0 | yal |
| .....cgggucgggaguuagcucaagcggguua..... | 1   | 0 | yal |
| .....cgggucgggaguuagcucaagcggguU.....  | 1   | 1 | yal |
| .....gggucgggaguuagcucaag.....         | 1   | 0 | yal |
| .....gggucgggaguuagcucaagc.....        | 13  | 0 | yal |
| .....gggucgggaguuagcucaagU.....        | 1   | 1 | yal |
| .....gggucgggaguuagcucaagcg.....       | 3   | 0 | yal |
| .....gggucgggaguuagcucaagcgU.....      | 1   | 1 | yal |
| .....gggucgggaguuagcucaagcUg.....      | 1   | 1 | yal |
| .....gggGcggaguuagcucaagcgg.....       | 1   | 1 | yal |
| .....gUgucgggaguuagcucaagcgg.....      | 1   | 1 | yal |
| .....gggucgggaguuagcucaaCcg.....       | 1   | 1 | yal |
| .....gggucgggaguuagcucaagcgg.....      | 122 | 0 | yal |
| .....gggucgggaguuagcucaagcggG.....     | 2   | 1 | yal |
| .....gggucgggaguuagcuUaaagcgggu.....   | 1   | 1 | yal |
| .....gggucgCaguuagcucaagcgggu.....     | 1   | 1 | yal |
| .....ggUucgggaguuagcucaagcgggu.....    | 2   | 1 | yal |
| .....gggucgggaguuagcucaagGgggu.....    | 1   | 1 | yal |
| .....gggucgggaguuagcucaaUcgggu.....    | 1   | 1 | yal |
| .....ggAucgggaguuagcucaagcgggu.....    | 1   | 1 | yal |
| .....gggGcgggaguuagcucaagcgggu.....    | 3   | 1 | yal |
| .....gggucgggaguuagcucaagcggGA.....    | 3   | 1 | yal |
| .....gCgucgggaguuagcucaagcgggu.....    | 1   | 1 | yal |
| .....gUgucgggaguuagcucaagcgggu.....    | 1   | 1 | yal |
| .....gggucgggUguuagcucaagcgggu.....    | 1   | 1 | yal |
| .....Cggucgggaguuagcucaagcgggu.....    | 2   | 1 | yal |
| .....gggucgggaguuagcucaagcggGC.....    | 3   | 1 | yal |
| .....gggucgggaguuagcucaagcggU.....     | 3   | 1 | yal |
| .....gggucgggaguuagcucaGgcgggu.....    | 1   | 1 | yal |
| .....gggucgggaguuagcucaagcgggu.....    | 368 | 0 | yal |
| .....Aggucgggaguuagcucaagcgggu.....    | 1   | 1 | yal |
| .....gggucgggaguuagcucaagcggGU.....    | 4   | 1 | yal |
| .....gggGcgggaguuagcucaagcgggu.....    | 14  | 1 | yal |
| .....gggCcgggaguuagcucaagcgggu.....    | 1   | 1 | yal |
| .....gggucgggaguuagcucaaUcgggu.....    | 2   | 1 | yal |
| .....gggucgggaguuagcucaGgcgggu.....    | 1   | 1 | yal |
| .....ggUucgggaguuagcucaagcgggu.....    | 1   | 1 | yal |
| .....gggucgggaguuagcucaagcggguG.....   | 1   | 1 | yal |
| .....gggucgggaguuagcucaagGgggu.....    | 1   | 1 | yal |
| .....gggucgggaguuagcucaagcggguA.....   | 1   | 1 | yal |
| .....gggucgggCguuagcucaagcgggu.....    | 2   | 1 | yal |
| .....gggucgggaguuagcucCagcgggu.....    | 1   | 1 | yal |
| .....gggucgggaguuagcucaagcggGU.....    | 4   | 1 | yal |
| .....gAgucgggaguuagcucaagcgggu.....    | 1   | 1 | yal |
| .....gggucgggUuuagcucaagcgggu.....     | 5   | 1 | yal |
| .....gggucgggaguuGgcucaagcgggu.....    | 1   | 1 | yal |
| .....gggucgggaguuagcucaagUgggu.....    | 2   | 1 | yal |
| .....gggucUgaguuagcucaagcgggu.....     | 2   | 1 | yal |
| .....ggguAggaguuagcucaagcgggu.....     | 1   | 1 | yal |
| .....gggucgggaguuagGucagcgggu.....     | 1   | 1 | yal |
| .....gggucgggaguuagcucaagcgggu.....    | 776 | 0 | yal |
| .....gggucggaCuuaagcucaagcgggu.....    | 1   | 1 | yal |
| .....gggucgggaguuagcuUaaagcgggu.....   | 1   | 1 | yal |

cuaccgggucggaguuagcucaagcgguuaccuccucaugcgggacuuucuaucuguccaucugugcgggguuucgagaccgcggggucuuacugaccuuuuuug

|                                        |    |   |     |
|----------------------------------------|----|---|-----|
| .....gggucggaguuagUucaagcgguu.....     | 1  | 1 | yal |
| .....gggucggaguuagcucaagcUguu.....     | 1  | 1 | yal |
| .....gggucggaguuagcucaagcggAU.....     | 1  | 1 | yal |
| .....gggucggaguuagcucaagcgguC.....     | 2  | 1 | yal |
| .....gggucggagCuagcucaagcgguu.....     | 2  | 1 | yal |
| .....Uggucggaguuagcucaagcgguu.....     | 2  | 1 | yal |
| .....gggucggaguuagcuUaagcgguu.....     | 2  | 1 | yal |
| .....gggucggaguuagcucaagcgguuA.....    | 11 | 0 | yal |
| .....gggucggaguuagcucaagcgguuU.....    | 2  | 1 | yal |
| .....gggucggaguuagcucaagcgguuac.....   | 3  | 0 | yal |
| .....ggucggaguuagcucaagcgguu.....      | 2  | 0 | yal |
| .....ggaguuagcucaagcgguu.....          | 1  | 0 | yal |
| .....ggaguuagcucaagcgguu.....          | 1  | 0 | yal |
| .....ggaguuagcucaagcgguuac.....        | 1  | 0 | yal |
| .....caagcgguuaccuccucaug.....         | 1  | 0 | yal |
| .....agcgguuaccuccucaugc.....          | 2  | 0 | yal |
| .....cgguuaccuccucaugcc.....           | 1  | 0 | yal |
| .....uaccuccucaugcggacuuu.....         | 1  | 0 | yal |
| .....uaccuccucaugcggacuuuC.....        | 1  | 0 | yal |
| .....uaccuccucaugcggacuuuA.....        | 2  | 1 | yal |
| .....accuccucaugcggacuuuC.....         | 1  | 0 | yal |
| .....cgcgggugcuuacugacc.....           | 5  | 0 | yal |
| .....cgcgggugcuuacugacc.....           | 4  | 0 | yal |
| .....cgcgggugcuuacugaccuu.....         | 2  | 0 | yal |
| .....cgcgggugUuuacugaccuuu.....        | 2  | 1 | yal |
| .....cgcgggugcuuacugaAccuu.....        | 1  | 1 | yal |
| .....cgcgggugcuuacugaccuuu.....        | 27 | 0 | yal |
| .....cgcgggugcuuacugaUccuu.....        | 1  | 1 | yal |
| .....cgcgggugcuuacugaccuuu.....        | 3  | 0 | yal |
| .....cgcgggugcuuacugaccuuuA.....       | 1  | 1 | yal |
| .....gcgggugcuuacugaccuuu.....         | 2  | 0 | yal |
| .....accgggucggaguuagcucaag.....       | 2  | 0 | s04 |
| .....accgggucggaguuagcucaagc.....      | 1  | 0 | s04 |
| .....accgggucggaguuagcucaagcg.....     | 2  | 0 | s04 |
| .....accgggucggaguuagcucaagcgg.....    | 7  | 0 | s04 |
| .....accgggCcgaguuagcucaagcgg.....     | 1  | 1 | s04 |
| .....accgggCcgaguuagcucaagcggU.....    | 1  | 1 | s04 |
| .....accgggCcgaguuagcucaagcggU.....    | 1  | 1 | s04 |
| .....accgggucggaguuagcucaagcggU.....   | 17 | 0 | s04 |
| .....accgggucggaguuagcucaagcggC.....   | 2  | 1 | s04 |
| .....acAcgggucggaguuagcucaagcgg.....   | 1  | 1 | s04 |
| .....accgggucggaguuagcucaagcggUA.....  | 1  | 1 | s04 |
| .....accgggucggaguuagcucaagcggAU.....  | 1  | 1 | s04 |
| .....accgggucggaguuagcucaagcgguu.....  | 9  | 0 | s04 |
| .....accgggGcggaguuagcucaagcgguu.....  | 1  | 1 | s04 |
| .....accgggucggaguuagcucaagcgguuU..... | 1  | 1 | s04 |
| .....accgggucggaguuagcucaagcgguuA..... | 1  | 0 | s04 |
| .....accgggCcgaguuagcucaagcgguuA.....  | 1  | 1 | s04 |
| .....accgggucggaguuagcucaagcggU.....   | 12 | 0 | s04 |
| .....accgggucggaguuagcucaagcggCU.....  | 1  | 1 | s04 |
| .....accgggucggaguuagcucaagcggUU.....  | 1  | 1 | s04 |
| .....accgggucggaguuagcucaagcggUU.....  | 1  | 1 | s04 |
| .....accgggucggaguuagcucaagcggUU.....  | 4  | 0 | s04 |
| .....ccgggucggaguuagcucaagc.....       | 3  | 0 | s04 |
| .....ccgggucggaguuagcucaagc.....       | 10 | 0 | s04 |
| .....ccgggucggaguuagcucaagcU.....      | 1  | 1 | s04 |
| .....cAgggucggaguuagcucaagcgg.....     | 1  | 1 | s04 |
| .....ccgggucggagUagcucaagcgg.....      | 1  | 1 | s04 |
| .....ccgggucggaguuagcucaagcgg.....     | 65 | 0 | s04 |
| .....cGgggucggaguuagcucaagcgg.....     | 1  | 1 | s04 |
| .....ccgggCcgaguuagcucaagcgg.....      | 2  | 1 | s04 |
| .....ccgggucggaguuagAUcaagcgg.....     | 1  | 1 | s04 |
| .....ccgggucggaguuagcucaagcGA.....     | 1  | 1 | s04 |

cuaccgggucggaguuagcucaagcgguuaccuccuacugcggacuuucuaucuguccaucucugucgggguuucgagaccgcgggugcuuacugaccuuuuuag

|                                     |     |   |     |
|-------------------------------------|-----|---|-----|
| ...ccgggucggCguuagcucaagcggg.....   | 1   | 1 | s04 |
| ...ccgggucggaguuagcucaagcggg.....   | 131 | 0 | s04 |
| ...ccgggucggaguuagcucaaaAcggg.....  | 1   | 1 | s04 |
| ...Ucgggucggaguuagcucaagcggg.....   | 1   | 1 | s04 |
| ...ccgggucggaguuUcuaaagcggg.....    | 1   | 1 | s04 |
| ...ccgggucggaguuagcucaUgcggg.....   | 1   | 1 | s04 |
| ...ccgggucggaguuagcucaagcggG.....   | 3   | 1 | s04 |
| ...ccgggucggCguuagcucaagcggg.....   | 1   | 1 | s04 |
| ...ccgggCcgaguuagcucaagcggg.....    | 2   | 1 | s04 |
| ...ccgggucggaguuagcucaagcggA.....   | 5   | 1 | s04 |
| ...ccgggGcggaguuagcucaagcggg.....   | 3   | 1 | s04 |
| ...ccgggucggaguuagcucaagcgguu.....  | 23  | 0 | s04 |
| ...ccgggucggaguuagcucaagcgggA.....  | 4   | 1 | s04 |
| ...ccgggucggaguuagcucaagcgggA.....  | 2   | 1 | s04 |
| ...ccgggucggaguuagcucaagcgggA.....  | 2   | 1 | s04 |
| ...ccgggucggaguuagcucaagcggguu..... | 1   | 0 | s04 |
| ...ccgggucggaguuagcucaagcgguuU..... | 7   | 1 | s04 |
| ...cgggucggaguuagcucaa.....         | 1   | 0 | s04 |
| ...cgggucUgaguuagcucaag.....        | 1   | 1 | s04 |
| ...cgggucggaguuagcucaag.....        | 12  | 0 | s04 |
| ...cgggGcggaguuagcucaagc.....       | 2   | 1 | s04 |
| ...cgggucggaguuagcucaagc.....       | 21  | 0 | s04 |
| ...cgggucggaguuagUucaagc.....       | 1   | 1 | s04 |
| ...cgggucggaguuagcucaagA.....       | 1   | 1 | s04 |
| ...cgggCcgaguuagcucaagc.....        | 1   | 1 | s04 |
| ...cgUgucggaguuagcucaagc.....       | 1   | 1 | s04 |
| ...cgggucggaguuagcucaaUcg.....      | 2   | 1 | s04 |
| ...cgggucggaguuagcucaagcU.....      | 3   | 1 | s04 |
| ...cgggucAgaguuagcucaagc.....       | 1   | 1 | s04 |
| ...cgggucggaguuagcucaagc.....       | 125 | 0 | s04 |
| ...cgggGcggaguuagcucaagc.....       | 6   | 1 | s04 |
| ...cgggucggagGuaagcucaagc.....      | 2   | 1 | s04 |
| ...cgggucggaguuagcucaCg.....        | 1   | 1 | s04 |
| ...cgggucggagCuagcucaagc.....       | 1   | 1 | s04 |
| ...cgggucggaguuUcuaagc.....         | 1   | 1 | s04 |
| ...cgggAcggaguuagcucaagc.....       | 1   | 1 | s04 |
| ...cgCgucggaguuagcucaagc.....       | 1   | 1 | s04 |
| ...cgggucggaguuagcuUaagc.....       | 1   | 1 | s04 |
| ...cgggucggaguuACcucaagc.....       | 1   | 1 | s04 |
| ...cgggCcgaguuagcucaagc.....        | 13  | 1 | s04 |
| ...cgggucggaguuagcucaagUgg.....     | 1   | 1 | s04 |
| ...cgggucggaguuagcucaGg.....        | 2   | 1 | s04 |
| ...cgggAcggaguuagcucaagc.....       | 6   | 1 | s04 |
| ...cgggucggagGuaagcucaagc.....      | 19  | 1 | s04 |
| ...cgggucggaguuagcucaaUc.....       | 5   | 1 | s04 |
| ...cgggucggaguuUcuaagc.....         | 1   | 1 | s04 |
| ...cgggucggaguuagcucaaC.....        | 2   | 1 | s04 |
| ...cgUgucggaguuagcucaagc.....       | 2   | 1 | s04 |
| ...cgggucggaguuagcucaagcA.....      | 9   | 1 | s04 |
| ...cgggucggaguuagcuGaa.....         | 1   | 1 | s04 |
| ...cgggucggaguuagAuaagc.....        | 3   | 1 | s04 |
| ...cgggucggaguuagcucaagG.....       | 1   | 1 | s04 |
| ...cgggGcggaguuagcucaagc.....       | 100 | 1 | s04 |
| ...cgggucggaguuGgcucaagc.....       | 1   | 1 | s04 |
| ...cgggucggUgaguuagcucaagc.....     | 1   | 1 | s04 |
| ...cgggucggaguuagcCcaagc.....       | 1   | 1 | s04 |
| ...cCggucggaguuagcucaagc.....       | 2   | 1 | s04 |
| ...cgggucggaguuagcuLaagc.....       | 1   | 1 | s04 |
| ...cgggucggagCuagcucaagc.....       | 6   | 1 | s04 |
| ...Ugggucggaguuagcucaagc.....       | 2   | 1 | s04 |
| ...cgggUAgaguuagcucaagc.....        | 3   | 1 | s04 |
| ...cgggucggaguuagcucaagcU.....      | 1   | 1 | s04 |
| ...cgggucgCaguuagcucaagc.....       | 1   | 1 | s04 |
| ...cgggucggaguuagcucaagcU.....      | 2   | 1 | s04 |
| ...cggCucggaguuagcucaagc.....       | 1   | 1 | s04 |
| ...cgggucAgaguuagcucaagc.....       | 1   | 1 | s04 |
| ...cUggucggaguuagcucaagc.....       | 1   | 1 | s04 |
| ...cgggucggaUuuagcucaagc.....       | 4   | 1 | s04 |
| ...cgggucggagUcagcucaagc.....       | 1   | 1 | s04 |



cuaccgggucgggaguuagcucaagcgguuaccucucuaugcggacuuucuaucuguccaucucugucgugggguucgagaccgcgggugcuuacugaccuuuuuug

|                                       |      |   |     |
|---------------------------------------|------|---|-----|
| .....Ggggucgggaguuagcucaagcgg.....    | 3    | 1 | s04 |
| .....Agggucgggaguuagcucaagcgg.....    | 3    | 1 | s04 |
| .....cgggucgggaguuagcucaagcgg.....    | 1    | 1 | s04 |
| .....cgggucgggaguuagcucUagcgg.....    | 1    | 1 | s04 |
| .....cgggucgggaguuagcucaagcgg.....    | 1392 | 0 | s04 |
| .....cgCgucgggaguuagcucaagcgg.....    | 1    | 1 | s04 |
| .....cgggucUgaguuagcucaagcgg.....     | 1    | 1 | s04 |
| .....cgggCcgaguuagcucaagcgg.....      | 44   | 1 | s04 |
| .....cgggGcgaguuagcucaagcgg.....      | 236  | 1 | s04 |
| .....cggguUggaguuagcucaagcgg.....     | 2    | 1 | s04 |
| .....cgggucgggaguuagcAcaagcgg.....    | 1    | 1 | s04 |
| .....cgggucgggAuuagcucaagcgg.....     | 2    | 1 | s04 |
| .....cgggucgggaguuagcucaagcUgu.....   | 1    | 1 | s04 |
| .....cgggucgggACuuagcucaagcgg.....    | 1    | 1 | s04 |
| .....cgggucgggaguuagcucaUgcgg.....    | 6    | 1 | s04 |
| .....cgggucgggaguuagcuAaagcgg.....    | 12   | 1 | s04 |
| .....cgggucgCaguuagcucaagcgg.....     | 3    | 1 | s04 |
| .....cgggucgggaguuagcucaagcgg.....    | 3568 | 0 | s04 |
| .....cgggucgggaguuAucuaagcgg.....     | 2    | 1 | s04 |
| .....cgggucgAaguuagcucaagcgg.....     | 2    | 1 | s04 |
| .....cgggucgggaguuagcucaUcgg.....     | 6    | 1 | s04 |
| .....cgggucgggaguuagcUcaagcgg.....    | 1    | 1 | s04 |
| .....cgggucgggaguuagcucaagUgg.....    | 3    | 1 | s04 |
| .....cgggucggCguuagcucaagcgg.....     | 2    | 1 | s04 |
| .....cgggucgggaguuagcucaagcggA.....   | 57   | 1 | s04 |
| .....cgggucgggaguuagcucaagAggu.....   | 4    | 1 | s04 |
| .....cgggucgggagCuaagcucaagcgg.....   | 10   | 1 | s04 |
| .....cgggucgggaguuUgcucaagcgg.....    | 1    | 1 | s04 |
| .....Agggucgggaguuagcucaagcgg.....    | 5    | 1 | s04 |
| .....cgggucgggaguuCgcucaagcgg.....    | 1    | 1 | s04 |
| .....cgggucgggaguuACcucaagcgg.....    | 1    | 1 | s04 |
| .....cgggucgggaguuagcGcaagcgg.....    | 2    | 1 | s04 |
| .....cgggucgggaguuagAuaagcgg.....     | 15   | 1 | s04 |
| .....cgggucgggagAuaagcucaagcgg.....   | 4    | 1 | s04 |
| .....cgggucgggaguuagcucaagcggG.....   | 71   | 1 | s04 |
| .....cCggucgggaguuagcucaagcgg.....    | 3    | 1 | s04 |
| .....cgggucgggaguuagcCcaagcgg.....    | 2    | 1 | s04 |
| .....cgggucgggUguuagcucaagcgg.....    | 1    | 1 | s04 |
| .....cgggucgggagUGagcucaagcgg.....    | 5    | 1 | s04 |
| .....cgAgucgggaguuagcucaagcgg.....    | 2    | 1 | s04 |
| .....cgggucgggagGuaagcucaagcgg.....   | 55   | 1 | s04 |
| .....cgggucgggagUCagcucaagcgg.....    | 2    | 1 | s04 |
| .....cgggucgggaguuagUucaagcgg.....    | 3    | 1 | s04 |
| .....cUggucgggaguuagcucaagcgg.....    | 8    | 1 | s04 |
| .....cgggucgggaguuagcucUagcgg.....    | 6    | 1 | s04 |
| .....cggCucgggaguuagcucaagcgg.....    | 4    | 1 | s04 |
| .....cgggucgggaguuagcucaagcCgu.....   | 1    | 1 | s04 |
| .....cgggucgggAuuagcucaagcgg.....     | 3    | 1 | s04 |
| .....cgggUaggaguuagcucaagcgg.....     | 9    | 1 | s04 |
| .....cggguGggaguuagcucaagcgg.....     | 2    | 1 | s04 |
| .....cgggucgggaguuagcucaagcgA.....    | 1    | 1 | s04 |
| .....cgggucCgaguuagcucaagcgg.....     | 1    | 1 | s04 |
| .....cgCgucgggaguuagcucaagcgg.....    | 1    | 1 | s04 |
| .....cgggucgggaguuagcucaagcAgu.....   | 1    | 1 | s04 |
| .....cgggAcggaguuagcucaagcgg.....     | 20   | 1 | s04 |
| .....cgggucgggaguuagcucaaCcg.....     | 1    | 1 | s04 |
| .....cgUgucgggaguuagcucaagcgg.....    | 1    | 1 | s04 |
| .....cgggucgggaguuagcuUaagcgg.....    | 3    | 1 | s04 |
| .....Ggggucgggaguuagcucaagcgg.....    | 8    | 1 | s04 |
| .....cgggucgggaguuagcucaagcggC.....   | 110  | 1 | s04 |
| .....cgggucgggaguuUcucaagcgg.....     | 2    | 1 | s04 |
| .....cgggucgggaguuagcucaagcCgu.....   | 3    | 1 | s04 |
| .....Ugggucgggaguuagcucaagcgg.....    | 5    | 1 | s04 |
| .....cgggGcgaguuagcucaagcgguu.....    | 45   | 1 | s04 |
| .....cgggucgggagGuaagcucaagcgguu..... | 5    | 1 | s04 |
| .....cgggucgggaguuagcucaagcggA.....   | 6    | 1 | s04 |
| .....cgggucgggaguuagcucaagcggC.....   | 3    | 1 | s04 |
| .....cgggUaggaguuagcucaagcgguu.....   | 3    | 1 | s04 |
| .....cgggucgggaguuagcucaagcggG.....   | 8    | 1 | s04 |

cuaccgggucgggaguuagcucaagcgguuuaccuccuacugcgggacuuucuaucuguccaucucugucgggguuucgagaccgcgggugcuuacugaccuuuuuag

|                                         |     |   |     |
|-----------------------------------------|-----|---|-----|
| .....cgggucCgaguuagcucaagcgguu.....     | 2   | 1 | s04 |
| .....cgggucgggaUuuagcucaagcgguu.....    | 1   | 1 | s04 |
| .....cgggucgggagUGagcucaagcgguu.....    | 1   | 1 | s04 |
| .....cgggucgggaguuagcucaagcCguu.....    | 1   | 1 | s04 |
| .....cgggCcgaguuagcucaagcgguu.....      | 6   | 1 | s04 |
| .....cgggucgggaguuagcucaUgcgguu.....    | 1   | 1 | s04 |
| .....cgggucgggaguuagcucaagcggGu.....    | 15  | 1 | s04 |
| .....cgggAcggaguuagcucaagcgguu.....     | 3   | 1 | s04 |
| .....cgggucgggagCuagcucaagcgguu.....    | 2   | 1 | s04 |
| .....cgggucgggaguuagcucaagcggCu.....    | 19  | 1 | s04 |
| .....cgggucgggaguuagcucaagcggUA.....    | 197 | 1 | s04 |
| .....cgggucgggaguuagcucaagcgguu.....    | 504 | 0 | s04 |
| .....Ggggucgggaguuagcucaagcgguu.....    | 8   | 1 | s04 |
| .....cgggucgggaguuagcuUaagcgguu.....    | 1   | 1 | s04 |
| .....cgggucgggaguuagcucaagcggUA.....    | 32  | 1 | s04 |
| .....cgggucgggaguuagcucaagcgguuG.....   | 1   | 1 | s04 |
| .....cgggucgggaguuagcucaagcgguuU.....   | 89  | 1 | s04 |
| .....cgggucgggaguuagUAaagcgguu.....     | 1   | 1 | s04 |
| .....cgggucgggaguuagcucaagcgguu.....    | 9   | 0 | s04 |
| .....cgggucgggaguuagcucaagcgguuU.....   | 1   | 1 | s04 |
| .....cgggucgggaguuagcucaagcgguuac.....  | 2   | 0 | s04 |
| .....cgggucgggaguuagcucaagcgguuA.....   | 1   | 1 | s04 |
| .....cgggucgggaguuagcucaagcgguuG.....   | 1   | 1 | s04 |
| .....cgggucgggaguuagcucaagcgguuacc..... | 1   | 0 | s04 |
| .....gggucgggagCuagcucaagc.....         | 1   | 1 | s04 |
| .....Cggucgggaguuagcucaagc.....         | 1   | 1 | s04 |
| .....gggucgggaguuagcucaagc.....         | 4   | 0 | s04 |
| .....ggguUgggaguuagcucaagcgg.....       | 1   | 1 | s04 |
| .....gggucgggaguuagcucaagcgg.....       | 2   | 0 | s04 |
| .....gggucgggaguuagcuUaagcgg.....       | 1   | 1 | s04 |
| .....gggucgggaguuagcucaagcgg.....       | 74  | 0 | s04 |
| .....gggucgggaguuagUucaagcgg.....       | 1   | 1 | s04 |
| .....gggucgggagUuagcucaagcgg.....       | 1   | 1 | s04 |
| .....gggGcgggaguuagcucaagcgg.....       | 3   | 1 | s04 |
| .....gggucgggagUGagcucaagcgg.....       | 1   | 1 | s04 |
| .....gUgucgggaguuagcucaagcgg.....       | 1   | 1 | s04 |
| .....Cggucgggaguuagcucaagcgg.....       | 1   | 1 | s04 |
| .....gggucgggaguuagcucaagAgg.....       | 1   | 1 | s04 |
| .....gggucgggaguuagUucaagcgg.....       | 2   | 1 | s04 |
| .....gggucgggaguuagcucaagcggA.....      | 3   | 1 | s04 |
| .....gggucgggaguuagcucaagcggG.....      | 8   | 1 | s04 |
| .....ggguUgggaguuagcucaagcgg.....       | 1   | 1 | s04 |
| .....gggucgggGuuagcucaagcgg.....        | 1   | 1 | s04 |
| .....gggucgggaguuagcucaagUgg.....       | 1   | 1 | s04 |
| .....gggucgggaguuUucaagcgg.....         | 1   | 1 | s04 |
| .....gggucgggaguuagcucaCcg.....         | 1   | 1 | s04 |
| .....gggCcgaguuagcucaagcgg.....         | 4   | 1 | s04 |
| .....gggucgggaguuagcucaagcggC.....      | 4   | 1 | s04 |
| .....gggGcgggaguuagcucaagcgg.....       | 31  | 1 | s04 |
| .....gggucgggaguuagcucaagcgg.....       | 370 | 0 | s04 |
| .....gggucgggagCuagcucaagcgg.....       | 1   | 1 | s04 |
| .....gggucgggaguuagcucaagAgg.....       | 2   | 1 | s04 |
| .....gggucgggaguuagcCcaagcgg.....       | 2   | 1 | s04 |
| .....Cggucgggaguuagcucaagcgg.....       | 1   | 1 | s04 |
| .....ggguGggaguuagcucaagcgg.....        | 1   | 1 | s04 |
| .....gggucgggaguuagcGcaagcgg.....       | 1   | 1 | s04 |
| .....gggucgggaUuuagcucaagcgg.....       | 1   | 1 | s04 |
| .....gggAcgggaguuagcucaagcgg.....       | 3   | 1 | s04 |
| .....gggucgggagUuagcucaagcgg.....       | 1   | 1 | s04 |
| .....gggucggCGuuagcucaagcgg.....        | 2   | 1 | s04 |
| .....gggucgggaguuagUAaagcgg.....        | 1   | 1 | s04 |
| .....gggucgggagUGagcucaagcgg.....       | 3   | 1 | s04 |
| .....gggucgggagUuagcucaagcgg.....       | 1   | 1 | s04 |
| .....gCgucgggaguuagcucaagcgg.....       | 1   | 1 | s04 |
| .....gggucgggaguuagcucaagcggU.....      | 2   | 1 | s04 |
| .....Cggucgggaguuagcucaagcgg.....       | 1   | 1 | s04 |
| .....ggguUgggaguuagcucaagcgg.....       | 1   | 1 | s04 |
| .....gggucgggaguuagcucaagcggG.....      | 7   | 1 | s04 |
| .....gggGcgggaguuagcucaagcgg.....       | 27  | 1 | s04 |



cuaccgggucggaguuagcucaagcgguuaccuccuacugcggacuuucuaucuguccaucucugucgggguuucgagaccgcgggugcuuacugaccuuuuuug

|                                  |     |   |     |
|----------------------------------|-----|---|-----|
| .....cgcggggGcuuacugaccuuu...    | 1   | 1 | s04 |
| .....cgcggggucuuacugaccuuu...    | 69  | 0 | s04 |
| .....cgcggggucuuacugaccuuu...    | 3   | 0 | s04 |
| .....cgcggggucuuacugaccCuuu...   | 1   | 1 | s04 |
| .....gcggggucuuacugacc...        | 1   | 0 | s04 |
| .....gcggggucuuacugaccuuu...     | 1   | 0 | s04 |
| ..accgggucggaguuagcucaagcgg...   | 3   | 0 | j26 |
| ..accgggucggaguuagcucaagcgg...   | 4   | 0 | j26 |
| ..ccgggucggaguuagcucaagcgg...    | 1   | 0 | j26 |
| ..Accgggucggaguuagcucaagcgg...   | 1   | 1 | j26 |
| ..Accgggucggaguuagcucaagcgg...   | 1   | 1 | j26 |
| ...cgggucggaguuagcucaagc...      | 2   | 0 | j26 |
| ...ccgggucggaguuagcucaagcgg...   | 1   | 0 | j26 |
| ...ccgggucggaguuagcucaagcgg...   | 10  | 0 | j26 |
| ...ccgggucggaguuagcucaagcgg...   | 10  | 0 | j26 |
| ...cgggucggaguuagcucaag...       | 4   | 0 | j26 |
| ...cgggucggaguuagcucaagc...      | 1   | 0 | j26 |
| ...cgggucggaguuagcucaagcA...     | 1   | 1 | j26 |
| ...cgggucggaguuagcucaagc...      | 2   | 0 | j26 |
| ...cgggucggaguuagcucaagcA...     | 1   | 1 | j26 |
| ...cgggucAgaguuagcucaagcgg...    | 2   | 1 | j26 |
| ...cgggucggaguuagcucaagcA...     | 1   | 1 | j26 |
| ...cgggucggaguuagcucaagcA...     | 2   | 1 | j26 |
| ...Ugggucggaguuagcucaagcgg...    | 1   | 1 | j26 |
| ...cgggucggaguuagcucCagcgg...    | 1   | 1 | j26 |
| ...Ggggucggaguuagcucaagcgg...    | 9   | 1 | j26 |
| ...cCgggucggaguuagcucaagcgg...   | 1   | 1 | j26 |
| ...cgggucgUaguuagcucaagcgg...    | 1   | 1 | j26 |
| ...cgggucggaguuacCucaagcgg...    | 1   | 1 | j26 |
| ...cgggucggaguuagcucaagcgg...    | 158 | 0 | j26 |
| ...cgggucggaguuagcucaagcgg...    | 1   | 1 | j26 |
| ...cgggucggaguuagcuUaagcgg...    | 1   | 1 | j26 |
| ...cgUgucggaguuagcucaagcgg...    | 2   | 1 | j26 |
| ...cgggucggaguuagcucaagcggA...   | 8   | 1 | j26 |
| ...cgggucggaguuagcCcaagcgg...    | 1   | 1 | j26 |
| ...cgggucggGguuagcucaagcgg...    | 1   | 1 | j26 |
| ...cUgggucggaguuagcucaagcgg...   | 1   | 1 | j26 |
| ...Agggucggaguuagcucaagcgg...    | 2   | 1 | j26 |
| ...cgggucggaguuagcucaagcgg...    | 1   | 1 | j26 |
| ...cgggucggaguuagcucaagcCg...    | 1   | 1 | j26 |
| ...cgggucggaguuGgcucaagcgg...    | 1   | 1 | j26 |
| ...Ugggucggaguuagcucaagcgg...    | 1   | 1 | j26 |
| ...cgggucggaguuagcucaagcgg...    | 283 | 0 | j26 |
| ...Ggggucggaguuagcucaagcgg...    | 28  | 1 | j26 |
| ...cgggucggaguuagcucaagAgg...    | 1   | 1 | j26 |
| ...cgAgucggaguuagcucaagcgg...    | 1   | 1 | j26 |
| ...cgggucggaguuagcucaagcUg...    | 1   | 1 | j26 |
| ...cgggucggaguuagcCcaagcgg...    | 1   | 1 | j26 |
| ...cgggucggagCuagcucaagcgg...    | 1   | 1 | j26 |
| ...Ugggucggaguuagcucaagcgg...    | 1   | 1 | j26 |
| ...cgUgucggaguuagcucaagcgg...    | 1   | 1 | j26 |
| ...cgggucggaguuagcuAaagcgg...    | 1   | 1 | j26 |
| ...cgggucggaguuagcucGagcgg...    | 1   | 1 | j26 |
| ...cgggucggaguuagcucaagcggA...   | 6   | 1 | j26 |
| ...Ggggucggaguuagcucaagcgg...    | 54  | 1 | j26 |
| ...cgggucggaguuagUucaagcgg...    | 1   | 1 | j26 |
| ...cgggucggaguuagcucaagcgg...    | 348 | 0 | j26 |
| ...cgggucggGguuagcucaagcgg...    | 1   | 1 | j26 |
| ...cUgggucggaguuagcucaagcgg...   | 1   | 1 | j26 |
| ...cgggucggaguuUcucucaagcgg...   | 1   | 1 | j26 |
| ...Agggucggaguuagcucaagcgg...    | 4   | 1 | j26 |
| ...cgggucgUaguuagcucaagcgg...    | 1   | 1 | j26 |
| ...cgggucggaguuagcucaagcggG...   | 1   | 1 | j26 |
| ...cgggucggaguuagcucaagcggC...   | 1   | 1 | j26 |
| ...cgggucggaguuagcucaagcggU...   | 1   | 1 | j26 |
| ...cgggucggaguuagcucaagcggua...  | 2   | 0 | j26 |
| ...cgggucggaguuagcucaagcggua...  | 3   | 1 | j26 |
| ...cgggucggaguuagcucaagcgguaA... | 1   | 1 | j26 |

cuaccgggucggaguuagcucaagcgguuaccuccuacugcggacuuucuaucuguccaucucugugcgggguuucgagaccgcgggugcuuacugaccuuuuuag

|                                     |      |   |     |
|-------------------------------------|------|---|-----|
| .....gggucggaguuagcucaa.....        | 3    | 0 | j26 |
| .....gggucggaguuagcucaag.....       | 2    | 0 | j26 |
| .....gggucggaguuagcucaagc.....      | 19   | 0 | j26 |
| .....gggucggaguuagcucaagcA.....     | 2    | 1 | j26 |
| .....gggucggaguuagUucaagcgg.....    | 1    | 1 | j26 |
| .....gggucggaguuagcucaagcgc.....    | 13   | 0 | j26 |
| .....gggucggaguuagcucaaUcg.....     | 1    | 1 | j26 |
| .....gggucgAaguuagcucaagcgg.....    | 1    | 1 | j26 |
| .....gggucggUguuagcucaagcgg.....    | 1    | 1 | j26 |
| .....gggCcggaguuagcucaagcgg.....    | 1    | 1 | j26 |
| .....gggucggagCuagcucaagcgg.....    | 1    | 1 | j26 |
| .....gggucggaguCagcucaagcgg.....    | 1    | 1 | j26 |
| .....gUgucggaguuagcucaagcgg.....    | 2    | 1 | j26 |
| .....gggucggGguuagcucaagcgg.....    | 1    | 1 | j26 |
| .....gggucggaguuagcucaagcgg.....    | 510  | 0 | j26 |
| .....gggGcggaguuagcucaagcgg.....    | 1    | 1 | j26 |
| .....gggucggaguuagUucaagcgg.....    | 2    | 1 | j26 |
| .....gggucggaguuA Ccucaagcgg.....   | 1    | 1 | j26 |
| .....gggucggaguuagcucaagcggU.....   | 3    | 1 | j26 |
| .....Aggucggaguuagcucaagcgg.....    | 1    | 1 | j26 |
| .....gggucggCguuagcucaagcgg.....    | 1    | 1 | j26 |
| .....gggucggaguuagcucaaUcgg.....    | 1    | 1 | j26 |
| .....gggucggaguuagcuUaagcgg.....    | 1    | 1 | j26 |
| .....gggucggaguuUcucaagcgg.....     | 1    | 1 | j26 |
| .....gggucggagAaagcucaagcgggu.....  | 1    | 1 | j26 |
| .....gggucggaAuuagcucaagcgggu.....  | 1    | 1 | j26 |
| .....gggucggaguuGgcuaagcgggu.....   | 2    | 1 | j26 |
| .....gggucggaguuagcucaaUcgggu.....  | 5    | 1 | j26 |
| .....gggucggaguuagcucaagcgggu.....  | 3080 | 0 | j26 |
| .....gggucggaguuagcucGagcgggu.....  | 5    | 1 | j26 |
| .....Uggucggaguuagcucaagcgggu.....  | 1    | 1 | j26 |
| .....gggucggaguuagcucaagcggC.....   | 13   | 1 | j26 |
| .....gggucUgaguuagcucaagcgggu.....  | 2    | 1 | j26 |
| .....gCgucggaguuagcucaagcgggu.....  | 2    | 1 | j26 |
| .....gggucggaguuagcucaagUggu.....   | 4    | 1 | j26 |
| .....Aggucggaguuagcucaagcgggu.....  | 2    | 1 | j26 |
| .....gggucggaguuagGuaagcgggu.....   | 3    | 1 | j26 |
| .....gggucggaguuagcucaagcggG.....   | 3    | 1 | j26 |
| .....gggucggCguuagcucaagcgggu.....  | 2    | 1 | j26 |
| .....gggucggaguuagcucaagcggUu.....  | 27   | 1 | j26 |
| .....gggucggaguuagcCcaagcgggu.....  | 7    | 1 | j26 |
| .....gggucAgaguuagcucaagcgggu.....  | 1    | 1 | j26 |
| .....gggCcggaguuagcucaagcgggu.....  | 3    | 1 | j26 |
| .....ggguAaggaguuagcucaagcgggu..... | 1    | 1 | j26 |
| .....gggGcggaguuagcucaagcgggu.....  | 3    | 1 | j26 |
| .....gggucggaguuagUucaagcgggu.....  | 4    | 1 | j26 |
| .....ggguUggaguuagcucaagcgggu.....  | 1    | 1 | j26 |
| .....gggucggaguuagcucUagcgggu.....  | 1    | 1 | j26 |
| .....gggucggaguuagcucaCgcgggu.....  | 1    | 1 | j26 |
| .....ggUcggaguuagcucaagcgggu.....   | 3    | 1 | j26 |
| .....gggucggaguuagcAcaagcgggu.....  | 1    | 1 | j26 |
| .....gggucggaguuCgcuaagcgggu.....   | 3    | 1 | j26 |
| .....gggAcggaguuagcucaagcgggu.....  | 1    | 1 | j26 |
| .....gggucggaguuUcucaagcgggu.....   | 6    | 1 | j26 |
| .....gggucggaguuagcucaagcAgu.....   | 3    | 1 | j26 |
| .....gggucggaguuagcucCagcgggu.....  | 9    | 1 | j26 |
| .....gggucggaguuagcucaaAacgggu..... | 2    | 1 | j26 |
| .....gggucggagUGagcucaagcgggu.....  | 1    | 1 | j26 |
| .....gggucggGguuagcucaagcgggu.....  | 2    | 1 | j26 |
| .....ggguGggaguuagcucaagcgggu.....  | 1    | 1 | j26 |
| .....gggucggaguuagcucaagcUgu.....   | 4    | 1 | j26 |
| .....ggAucggaguuagcucaagcgggu.....  | 1    | 1 | j26 |
| .....gggucggUguuagcucaagcgggu.....  | 1    | 1 | j26 |
| .....gUgucggaguuagcucaagcgggu.....  | 5    | 1 | j26 |
| .....gggucggagGuaagcucaagcgggu..... | 3    | 1 | j26 |
| .....gAucggaguuagcucaagcgggu.....   | 2    | 1 | j26 |
| .....gggucggaguuagcucaagcggCu.....  | 1    | 1 | j26 |
| .....gggucggagCuagcucaagcgggu.....  | 3    | 1 | j26 |
| .....gggucgUaguuagcucaagcgggu.....  | 2    | 1 | j26 |

cuaccgggucggaguuagcucaagcgguuaccuccuacugcggacuucuaucuguccaucucugugcgggguucgagaccgcgggugcuuacugaccuuuuug

|                                     |       |   |     |
|-------------------------------------|-------|---|-----|
| .....gggucgCaguuagcucaagcgguu.....  | 3     | 1 | j26 |
| .....gggucggaguuagcuAaagcgguu.....  | 2     | 1 | j26 |
| .....gggucggaguuagcuUaagcgguu.....  | 5     | 1 | j26 |
| .....gggucggaUuuagcucaagcgguu.....  | 3     | 1 | j26 |
| .....gggucggaguuagcucaagcggA.....   | 6     | 1 | j26 |
| .....gggucggaguuGgcucaagcgguu.....  | 2     | 1 | j26 |
| .....gggucggaguuagcucaCgcgguu.....  | 7     | 1 | j26 |
| .....gggucggaguuagcucaagUgguu.....  | 7     | 1 | j26 |
| .....gggucAagaguuagcucaagcgguu..... | 5     | 1 | j26 |
| .....gggucggaguuUcucaagcgguu.....   | 11    | 1 | j26 |
| .....gggucggaUuuagcucaagcgguu.....  | 5     | 1 | j26 |
| .....gAagcggaguuagcucaagcgguu.....  | 5     | 1 | j26 |
| .....gggucggaguuagcAaagcgguu.....   | 4     | 1 | j26 |
| .....Cggucggaguuagcucaagcgguu.....  | 3     | 1 | j26 |
| .....gggucggaguuagcucaaUcgguu.....  | 15    | 1 | j26 |
| .....gggucggaguuagcucaagcggCu.....  | 35    | 1 | j26 |
| .....gggucgAaguuagcucaagcgguu.....  | 2     | 1 | j26 |
| .....ggguGggaguuagcucaagcgguu.....  | 4     | 1 | j26 |
| .....gggucggaguuagAucaagcgguu.....  | 1     | 1 | j26 |
| .....ggAucggaguuagcucaagcgguu.....  | 8     | 1 | j26 |
| .....ggCucggaguuagcucaagcgguu.....  | 4     | 1 | j26 |
| .....gggucUgaguuagcucaagcgguu.....  | 1     | 1 | j26 |
| .....gggucggaguuagcucCagcgguu.....  | 26    | 1 | j26 |
| .....gggucggaguuAucucaagcgguu.....  | 3     | 1 | j26 |
| .....gggucggagCuagcucaagcgguu.....  | 5     | 1 | j26 |
| .....gggucgCaguuagcucaagcgguu.....  | 6     | 1 | j26 |
| .....ggguUggaguuagcucaagcgguu.....  | 8     | 1 | j26 |
| .....gggucgUaguuagcucaagcgguu.....  | 16    | 1 | j26 |
| .....gggucggaguuAagcucaagcgguu..... | 2     | 1 | j26 |
| .....gggucggaguuagcuAaagcgguu.....  | 1     | 1 | j26 |
| .....gggCcgaguuagcucaagcgguu.....   | 12    | 1 | j26 |
| .....gggucggUguuagcucaagcgguu.....  | 3     | 1 | j26 |
| .....Uggucggaguuagcucaagcgguu.....  | 6     | 1 | j26 |
| .....gggucggaCuuagcucaagcgguu.....  | 3     | 1 | j26 |
| .....gggucggaguuagcucaUgcgguu.....  | 2     | 1 | j26 |
| .....gggucggaguuagcucaaCcggu.....   | 6     | 1 | j26 |
| .....gggCcggaguuagcucaagcgguu.....  | 7     | 1 | j26 |
| .....gggucggaguuagcucGagcgguu.....  | 4     | 1 | j26 |
| .....gggucggagucCagcucaagcgguu..... | 11    | 1 | j26 |
| .....gggucggaguuagcucaagcAgu.....   | 3     | 1 | j26 |
| .....gggucggaguuCgcucaagcgguu.....  | 4     | 1 | j26 |
| .....gggucggCguuagcucaagcgguu.....  | 9     | 1 | j26 |
| .....gggucggaguuagcucaagcUuu.....   | 3     | 1 | j26 |
| .....gggucCgaguuagcucaagcgguu.....  | 1     | 1 | j26 |
| .....gggucggaguuAccucaagcgguu.....  | 5     | 1 | j26 |
| .....gggucggaguuagcucaagcggGu.....  | 15    | 1 | j26 |
| .....gUgucggaguuagcucaagcgguu.....  | 15    | 1 | j26 |
| .....gCgucggaguuagcucaagcgguu.....  | 5     | 1 | j26 |
| .....gggucggaguuagcucaagcCgu.....   | 7     | 1 | j26 |
| .....gggucggaguuagcucaagcgguC.....  | 10    | 1 | j26 |
| .....gggucggaguuagUucaagcgguu.....  | 16    | 1 | j26 |
| .....gggucggaguuagcucaagcGcu.....   | 4     | 1 | j26 |
| .....gggucggaguuagcuGaagcgguu.....  | 1     | 1 | j26 |
| .....gggucggGguuagcucaagcgguu.....  | 6     | 1 | j26 |
| .....gggucggaguuagGucaagcgguu.....  | 1     | 1 | j26 |
| .....gggucggaguuagcuUaagcgguu.....  | 16    | 1 | j26 |
| .....gggAcgaguuagcucaagcgguu.....   | 2     | 1 | j26 |
| .....gggucggaguuagcucaagcggua.....  | 16    | 1 | j26 |
| .....gggucggaAuuagcucaagcgguu.....  | 1     | 1 | j26 |
| .....gggucggagGuaagcucaagcgguu..... | 1     | 1 | j26 |
| .....Aggucggaguuagcucaagcgguu.....  | 5     | 1 | j26 |
| .....gggucggagAuaagcucaagcgguu..... | 3     | 1 | j26 |
| .....gggucggaguuagcucaGgcgguu.....  | 1     | 1 | j26 |
| .....gggucggaguuagcucaagcggA.....   | 8     | 1 | j26 |
| .....ggUucggaguuagcucaagcgguu.....  | 5     | 1 | j26 |
| .....gggucggaguuagcucaagcGhu.....   | 1     | 1 | j26 |
| .....gggucggaguuagcCcaagcgguu.....  | 8     | 1 | j26 |
| .....gggucggaguuagcucaagcUgu.....   | 19    | 1 | j26 |
| .....gggucggaguuagcucaagcgguu.....  | 10892 | 0 | j26 |

cuaccgggucggaguuagcucaagcgguuuaccuccuacugcggacuucuaucuguccaucucugucgggguuucgagaccgcggggugcuuacugaccuuuuuag

|                                                    |     |   |     |
|----------------------------------------------------|-----|---|-----|
| . . . . . gggucggaguuagcGcaagcgguu . . . . .       | 2   | 1 | j26 |
| . . . . . gggucggaguuagcucaagAgguu . . . . .       | 1   | 1 | j26 |
| . . . . . gggucggaguuagcucaaaAcgguu . . . . .      | 4   | 1 | j26 |
| . . . . . gggucggaguuagcucaagcgguaCa . . . . .     | 1   | 1 | j26 |
| . . . . . gggucggaguuagcucaagcgguuA . . . . .      | 108 | 0 | j26 |
| . . . . . gggucggaguuagcucaagcgguaAa . . . . .     | 12  | 1 | j26 |
| . . . . . gggucggaguuagcucaagcgguuC . . . . .      | 2   | 1 | j26 |
| . . . . . gggucgUaguuagcucaagcgguuA . . . . .      | 1   | 1 | j26 |
| . . . . . gggucggaguuagcucaagcUguua . . . . .      | 1   | 1 | j26 |
| . . . . . gggucggaguuagcucaagcgguuU . . . . .      | 8   | 1 | j26 |
| . . . . . gggucggaguuagcucaagcgguuAA . . . . .     | 26  | 1 | j26 |
| . . . . . gggucggaguuagcucaagcgguuUC . . . . .     | 1   | 1 | j26 |
| . . . . . gggucggaguuagcucaagcgguuac . . . . .     | 12  | 0 | j26 |
| . . . . . ggucggaguuagcucaagcgg . . . . .          | 1   | 0 | j26 |
| . . . . . ggucggaguuagcucaagcgg . . . . .          | 2   | 0 | j26 |
| . . . . . ggucggaguuagcucaagcgguu . . . . .        | 10  | 0 | j26 |
| . . . . . ggucggaguuagcucaagcGUu . . . . .         | 2   | 1 | j26 |
| . . . . . ggucggaguuagcucaagcgguuac . . . . .      | 1   | 0 | j26 |
| . . . . . gucggaguuagcucaagcgguu . . . . .         | 2   | 0 | j26 |
| . . . . . ucggaguuagcucaagcgguuA . . . . .         | 1   | 0 | j26 |
| . . . . . cggaguuagcucaagcgg . . . . .             | 1   | 0 | j26 |
| . . . . . Gggaguuagcucaagcgguu . . . . .           | 1   | 1 | j26 |
| . . . . . ggaguuagcucaagcgg . . . . .              | 1   | 0 | j26 |
| . . . . . ggaguuagcucaagcgguu . . . . .            | 1   | 0 | j26 |
| . . . . . uaccuccuacugcggacu . . . . .             | 1   | 0 | j26 |
| . . . . . uaccuccuacugcggacu . . . . .             | 1   | 0 | j26 |
| . . . . . ccuccuacugcggacu . . . . .               | 1   | 0 | j26 |
| . . . . . cuccuacugcggacu . . . . .                | 1   | 0 | j26 |
| . . . . . guccaucucugucgggguuucgagacc . . . . .    | 2   | 0 | j26 |
| . . . . . cuugucgggguuucgaga . . . . .             | 1   | 0 | j26 |
| . . . . . cuugucgggguuucgagac . . . . .            | 1   | 0 | j26 |
| . . . . . agaccgcggggucuuacugacc . . . . .         | 2   | 0 | j26 |
| . . . . . agaccgcggggucuuacugaccuu . . . . .       | 1   | 0 | j26 |
| . . . . . agaccgcggggucuuacugaccuuuu . . . . .     | 6   | 0 | j26 |
| . . . . . gaccgcggggucuuacugaccuuuu . . . . .      | 2   | 0 | j26 |
| . . . . . gaccgcggggucuuacugaccuuuu . . . . .      | 3   | 0 | j26 |
| . . . . . acccgcggggucuuacuga . . . . .            | 1   | 0 | j26 |
| . . . . . acccgcggggucuuacugaccuu . . . . .        | 1   | 0 | j26 |
| . . . . . acccgcggggucuuacugaccuuuu . . . . .      | 1   | 0 | j26 |
| . . . . . cgcggggucuuacugaccuu . . . . .           | 3   | 0 | j26 |
| . . . . . cgcggggucuuacugaccuu . . . . .           | 16  | 0 | j26 |
| . . . . . cgcggggucuuacugaccuuuu . . . . .         | 2   | 0 | j26 |
| . . . . . ggcggggucuuacugaccuuuu . . . . .         | 1   | 0 | j26 |
| . . . . . gcggggucuuacugaccuuuu . . . . .          | 2   | 0 | j26 |
| . . . . . acccgggucggaguuagcucaa . . . . .         | 1   | 0 | val |
| . . . . . acccgggucggaguuagcucaag . . . . .        | 2   | 0 | val |
| . . . . . acccgggAcggaguuagcucaag . . . . .        | 1   | 1 | val |
| . . . . . acccgggucggaguuagcucaagc . . . . .       | 1   | 0 | val |
| . . . . . acccgggucggaguuagcucUagc . . . . .       | 1   | 1 | val |
| . . . . . acccgggucggaguuagcucaagc . . . . .       | 1   | 0 | val |
| . . . . . acccgggucggaguuagcucaagcgg . . . . .     | 1   | 1 | val |
| . . . . . acccgggucggaguuagcucaagcgg . . . . .     | 8   | 0 | val |
| . . . . . acccgggucggaguuagcucCagcgg . . . . .     | 1   | 1 | val |
| . . . . . acccgggucggaguuagcucaagcgg . . . . .     | 8   | 0 | val |
| . . . . . acccgggucggaguuagcucCagcgg . . . . .     | 1   | 1 | val |
| . . . . . acccgggucggaguuagcucaagcgguu . . . . .   | 3   | 0 | val |
| . . . . . acccgggucggaguuagcucaagcgguuac . . . . . | 2   | 0 | val |
| . . . . . cccgggucggaguuagcucaagc . . . . .        | 2   | 0 | val |
| . . . . . cccgggucggaguuagcucaagcgg . . . . .      | 6   | 0 | val |
| . . . . . Accgggucggaguuagcucaagcgg . . . . .      | 4   | 1 | val |
| . . . . . cccgggucggaguuagcucaagcG . . . . .       | 1   | 1 | val |
| . . . . . Accgggucggaguuagcucaagcgg . . . . .      | 2   | 1 | val |
| . . . . . cccgggucggaguuagcucaagcgg . . . . .      | 8   | 0 | val |
| . . . . . cccgggucggaguuagcucaagcgguu . . . . .    | 1   | 0 | val |
| . . . . . Accgggucggaguuagcucaagcgguu . . . . .    | 1   | 1 | val |
| . . . . . cccgggucggaguuagcucaa . . . . .          | 1   | 0 | val |
| . . . . . ccgggucggaguuagcucaagc . . . . .         | 3   | 0 | val |
| . . . . . ccgggucggaguuagcucaagcG . . . . .        | 1   | 1 | val |

cuaccgggucgggaguuagcucaagcgguuaccuccuacugcgggacuuucuaucuguccaucucugugcgggguuucgagaccgcggggugcuuacugaccuuuuuag

|                                      |    |   |     |
|--------------------------------------|----|---|-----|
| ...ccgggucgggaguuagcucGagcgg...      | 1  | 1 | val |
| ...cGgggucgggaguuagcucaagcgg...      | 1  | 1 | val |
| ...ccgggucgggaguuagcucaagcGÅ...      | 4  | 1 | val |
| ...ccgggucgggaguuAÅcucaagcgg...      | 1  | 1 | val |
| ...ccgggucgggaguuagÅuÅcaagcgg...     | 1  | 1 | val |
| ...ccgggucgggaguuagcucaagcgg...      | 94 | 0 | val |
| ...cGgggucgggaguuagcucaagcgg...      | 2  | 1 | val |
| ...ccgggucgggaguuCgcucaagcgg...      | 1  | 1 | val |
| ...cÅgggucgggaguuagcucaagcgg...      | 2  | 1 | val |
| ...ccgggucgggaguuagcucaaUcgg...      | 1  | 1 | val |
| ...ccgggucgggaguuagcucaagcgg...      | 53 | 0 | val |
| ...ccgggucgggaguuagcucaagcggÅ...     | 11 | 1 | val |
| ...ccgggucgggaguuUcuaagcgg...        | 1  | 1 | val |
| ...ccgggucgggaguuagcucaagcggC...     | 1  | 1 | val |
| ...ccgggucgggaguuagcCcaagcgg...      | 1  | 1 | val |
| ...ccgggucgggaguuagcucUagcgg...      | 1  | 1 | val |
| ...ccgggucgggaguuagcucaagcgg...      | 11 | 0 | val |
| ...Gcgggucgggaguuagcucaagcgg...      | 1  | 1 | val |
| ...ccgggucgggaguuagcucaagcggÅ...     | 4  | 1 | val |
| ...ccgggucgggaguuagcucaagcggÅÅ...    | 1  | 1 | val |
| ...ccgggucgggaguuagcucaagcggÅU...    | 1  | 1 | val |
| ...ccgggucgggaguuagcucaagcggÅuccu... | 1  | 0 | val |
| ...Ggggucgggaguuagcucaag...          | 1  | 1 | val |
| ...cgggucgggaguuagcucaag...          | 9  | 0 | val |
| ...cgggucgggaguuagcucaagc...         | 18 | 0 | val |
| ...cgggucgggaguuagcucaagcgg...       | 59 | 0 | val |
| ...cgggucgggaguuagcucaagÅg...        | 1  | 1 | val |
| ...cgggucgggaguuAÅcucaagcgg...       | 1  | 1 | val |
| ...Ggggucgggaguuagcucaagcgg...       | 3  | 1 | val |
| ...cgggucgggaguuagcCcaagcgg...       | 1  | 1 | val |
| ...cÅggucgggaguuagcucaagcgg...       | 1  | 1 | val |
| ...cgggucgggaguuagcucCagcgg...       | 1  | 1 | val |
| ...cgggGcgggaguuagcucaagcgg...       | 1  | 1 | val |
| ...Ugggucgggaguuagcucaagcgg...       | 4  | 1 | val |
| ...cgggucUgaguuagcucaagcgg...        | 1  | 1 | val |
| ...cgggucgggaguuagcucCagcgg...       | 4  | 1 | val |
| ...cgggucgggaguuUgcucaagcgg...       | 1  | 1 | val |
| ...Ggggucgggaguuagcucaagcgg...       | 31 | 1 | val |
| ...cgggucgggaguuUcuaagcgg...         | 6  | 1 | val |
| ...cgggucgggaguuagcuUaagcgg...       | 1  | 1 | val |
| ...cgggGcgggaguuagcucaagcgg...       | 3  | 1 | val |
| ...cggÅucgggaguuagcucaagcgg...       | 1  | 1 | val |
| ...cgggucgggaguuagcucaagÅgg...       | 6  | 1 | val |
| ...cgggucgggaguuagcucaagcÅg...       | 1  | 1 | val |
| ...cgUgucgggaguuagcucaagcgg...       | 1  | 1 | val |
| ...cgggucgggaguuÅagcucaagcgg...      | 1  | 1 | val |
| ...cgggucgggaguuagcucUagcgg...       | 1  | 1 | val |
| ...cggguUgggaguuagcucaagcgg...       | 1  | 1 | val |
| ...cgggucggGguuagcucaagcgg...        | 1  | 1 | val |
| ...cgggucgggÅcuuagcucaagcgg...       | 1  | 1 | val |
| ...cgggucgggaguuagcucaagcGÅ...       | 14 | 1 | val |
| ...cgggucgggaguuagcucaUgicgg...      | 1  | 1 | val |
| ...cgggucgggaguuagcuÅaagcgg...       | 1  | 1 | val |
| ...Ågggucgggaguuagcucaagcgg...       | 3  | 1 | val |
| ...cgggucgggagUaagcucaagcgg...       | 1  | 1 | val |
| ...cgggucgggaguuUcaagcgg...          | 4  | 1 | val |
| ...cgggucgggaguuGgcuaagcgg...        | 1  | 1 | val |
| ...cgggucgggaguuagcCcaagcgg...       | 1  | 1 | val |
| ...cgggucgggÅuuagcucaagcgg...        | 1  | 1 | val |
| ...cgggÅcgggaguuagcucaagcgg...       | 1  | 1 | val |
| ...cÅggucgggaguuagcucaagcgg...       | 1  | 1 | val |
| ...cggguÅgggaguuagcucaagcgg...       | 2  | 1 | val |
| ...cgggucgggaguuagcucaagcggU...      | 11 | 1 | val |
| ...cgggucggGguuagcucaagcgg...        | 1  | 1 | val |
| ...cgggCcgaguuagcucaagcgg...         | 1  | 1 | val |
| ...cgggucgggaguuCagcucaagcgg...      | 2  | 1 | val |
| ...cgggucgggaguuagcucGagcgg...       | 1  | 1 | val |
| ...cgggucgggaguuCgcucaagcgg...       | 1  | 1 | val |
| ...cgggucgggaguuagcucaagUgg...       | 2  | 1 | val |



cuaccgggucgggaguuagcucaagcgguuaccuccuacugcggacuuucuaucuguccaucucugucgggguuucgagaccgcgggugcuuacugaccuuuuuag

|                                       |      |   |     |
|---------------------------------------|------|---|-----|
| .....cgggucgggaguuagGuaagcgg.....     | 5    | 1 | val |
| .....cgggucgggAuuagcucaagcgg.....     | 1    | 1 | val |
| .....cgggucgggaguuAuccuagcgg.....     | 2    | 1 | val |
| .....cCggucgggaguuagcucaagcgg.....    | 2    | 1 | val |
| .....cgggucggAaguuagcucaagcgg.....    | 1    | 1 | val |
| .....cgggucgggaguuagcucaagcgg.....    | 1374 | 0 | val |
| .....cgggucgggaguuAuccuagcgg.....     | 3    | 1 | val |
| .....cgggucgggaguuagAuccuagcgg.....   | 8    | 1 | val |
| .....cgggucgggaguuagcucaCgcgg.....    | 1    | 1 | val |
| .....cgggucgggaguuagcucaagGgg.....    | 1    | 1 | val |
| .....cUggucgggaguuagcucaagcgg.....    | 2    | 1 | val |
| .....cgggucgggaguuagcucaagcgg.....    | 2145 | 0 | val |
| .....cgggucgggaguuagcucaaUcgg.....    | 3    | 1 | val |
| .....cgggucgggaguuagAuccuagcgg.....   | 8    | 1 | val |
| .....cgggucggGuuagcucaagcgg.....      | 1    | 1 | val |
| .....cgggucgggGuaagcucaagcgg.....     | 2    | 1 | val |
| .....cgggucgggaguuagcucaagcUu.....    | 1    | 1 | val |
| .....cgggucgggaguuagcucaagcgg.....    | 1    | 1 | val |
| .....cgggucgggaguuagcuGaaagcgg.....   | 1    | 1 | val |
| .....cggguAaggaguuagcucaagcgg.....    | 5    | 1 | val |
| .....cgggucgggaguuAuccuagcgg.....     | 7    | 1 | val |
| .....cgggGcggaguuagcucaagcgg.....     | 10   | 1 | val |
| .....cgggucgggaguuAuccuagcgg.....     | 8    | 1 | val |
| .....cgUgucgggaguuagcucaagcgg.....    | 1    | 1 | val |
| .....cgggucgggaguuCgcucaagcgg.....    | 1    | 1 | val |
| .....cgggucgggaguuagcucaUgcgg.....    | 1    | 1 | val |
| .....cgggucgggaguuagcucaCgcgg.....    | 3    | 1 | val |
| .....Ggggucgggaguuagcucaagcgg.....    | 102  | 1 | val |
| .....cgggucgggaguuagcucaagcggA.....   | 111  | 1 | val |
| .....cgggucgggaguuagcuAaagcgg.....    | 3    | 1 | val |
| .....cgggCcggaguuagcucaagcgg.....     | 1    | 1 | val |
| .....cgggucgggAuuagcucaagcgg.....     | 1    | 1 | val |
| .....cgggucgggaguuagcucaagcggC.....   | 3    | 1 | val |
| .....cgggucgggaguuagcucaagcgg.....    | 1    | 1 | val |
| .....cgggucgggaguuagcGcaagcgg.....    | 2    | 1 | val |
| .....Ugggucgggaguuagcucaagcgg.....    | 2    | 1 | val |
| .....cgggucgggaguuGgcucaagcgg.....    | 1    | 1 | val |
| .....cCggucgggaguuagcucaagcgg.....    | 3    | 1 | val |
| .....cgggucgggaguuagGuccaagcgg.....   | 1    | 1 | val |
| .....cgggucgggaguuagcucaagcggG.....   | 4    | 1 | val |
| .....cggUcgggaguuagcucaagcgg.....     | 2    | 1 | val |
| .....Agggucgggaguuagcucaagcgg.....    | 5    | 1 | val |
| .....cgggucgggaguuagcucaagcGau.....   | 1    | 1 | val |
| .....cgggucgggaguuagcucaagcAgu.....   | 1    | 1 | val |
| .....cgggucgggaguuagcucaagAgg.....    | 1    | 1 | val |
| .....cggguUgggaguuagcucaagcgg.....    | 3    | 1 | val |
| .....cgggucgggaguuagcucaaCcg.....     | 2    | 1 | val |
| .....cgggucgggaguuagcCcaagcgg.....    | 2    | 1 | val |
| .....cgggucgggAuuagcucaagcgg.....     | 1    | 1 | val |
| .....cgggucgggaguuagcucCagcgg.....    | 15   | 1 | val |
| .....cgggucgggaguuagUucaagcgg.....    | 3    | 1 | val |
| .....cgggucgggaguuagcuUaagcgg.....    | 2    | 1 | val |
| .....cgggucgggaguuAuccuagcgg.....     | 8    | 1 | val |
| .....cgggucgUaguuagcucaagcgg.....     | 1    | 1 | val |
| .....cgggucgggaguuagcucaagcCgu.....   | 1    | 1 | val |
| .....cUggucgggaguuagcucaagcgg.....    | 5    | 1 | val |
| .....cgggucggGguuagcucaagcgg.....     | 1    | 1 | val |
| .....cgggucgggaguuCagcucaagcgg.....   | 5    | 1 | val |
| .....cgggucCgaguuagcucaagcgg.....     | 1    | 1 | val |
| .....cgggucgggaguuagcucaagcUgu.....   | 2    | 1 | val |
| .....cgggucgggaguuagcucaGgcgg.....    | 1    | 1 | val |
| .....cgggucgggaguuagcucaagUggu.....   | 3    | 1 | val |
| .....cAggucgggaguuagcucaagcgg.....    | 3    | 1 | val |
| .....cgggucgggaguuagcucaagcggC.....   | 1    | 1 | val |
| .....cgggucgggaguuAuccuagcgguu.....   | 1    | 1 | val |
| .....cCggucgggaguuagcucaagcgguu.....  | 1    | 1 | val |
| .....cgggGcggaguuagcucaagcgguu.....   | 1    | 1 | val |
| .....cgggucgggaguuagcuGaaagcgguu..... | 1    | 1 | val |
| .....cUggucgggaguuagcucaagcgguu.....  | 2    | 1 | val |

cuaccgggucgggaguuagcucaagcgguuuaccuccuacugcgggacuuucuaucuguccaucucugucgggguuucgagaccgcgggugcuuacugaccuuuuuag

|                                           |     |   |     |
|-------------------------------------------|-----|---|-----|
| .....Ggggucgggaguuagcucaagcgguu.....      | 38  | 1 | val |
| .....cgggucgggaguuuacCucaagcgguu.....     | 2   | 1 | val |
| .....cggguUggaguuagcucaagcgguu.....       | 1   | 1 | val |
| .....cgggucgggaguuagcucaagcggAu.....      | 8   | 1 | val |
| .....cgggucgggaguuagcucaagcgguu.....      | 261 | 0 | val |
| .....cgggucgggaguuuAucucaagcgguu.....     | 2   | 1 | val |
| .....cggguuAggaguuagcucaagcgguu.....      | 1   | 1 | val |
| .....cgggucgggCguuagcucaagcgguu.....      | 1   | 1 | val |
| .....cgggAcggaguuagcucaagcgguu.....       | 1   | 1 | val |
| .....cgggucgggaguuagcucaagcGUuu.....      | 1   | 1 | val |
| .....cgggucgggaguuagcucaCgcgguu.....      | 1   | 1 | val |
| .....cgggucgggaguuagcucaagcgguuG.....     | 5   | 1 | val |
| .....cgggucgggaguuagcucaagUgguu.....      | 1   | 1 | val |
| .....cAggucgggaguuagcucaagcgguu.....      | 1   | 1 | val |
| .....cgggucgggaguuagcucaagcgguuA.....     | 179 | 1 | val |
| .....cgggucgggaguuagcGcaagcgguuu.....     | 1   | 1 | val |
| .....cgggucgggaguuagcucaagcgguuu.....     | 24  | 0 | val |
| .....cCggucgggaguuagcucaagcgguu.....      | 1   | 1 | val |
| .....cgggucgggaguuagcucaagcgguuC.....     | 1   | 1 | val |
| .....Ggggucgggaguuagcucaagcgguuu.....     | 8   | 1 | val |
| .....cgggucgggaguuagcucaagcgguuGa.....    | 2   | 1 | val |
| .....cgggucgggaguuagcucaagcgguuG.....     | 1   | 1 | val |
| .....cgggucgggaguuagcucaagcgguuCa.....    | 1   | 1 | val |
| .....cgggucgggaguuagcucaagcgguuU.....     | 72  | 1 | val |
| .....cgggucgggaguuuacCucaagcgguuu.....    | 1   | 1 | val |
| .....cgggucgggaguuagcucaagcgguuA.....     | 69  | 1 | val |
| .....cgggucgggaguuagcucaagcgguuuA.....    | 5   | 1 | val |
| .....Ggggucgggaguuagcucaagcgguuuac.....   | 3   | 1 | val |
| .....cgggucgggaguuagcucaagcgguuuU.....    | 3   | 1 | val |
| .....Ggggucgggaguuagcucaagcgguuuacc.....  | 2   | 1 | val |
| .....cgggucgggaguuagcucaagcgguuuacc.....  | 1   | 0 | val |
| .....Ggggucgggaguuagcucaagcgguuuaccu..... | 1   | 1 | val |
| .....cgggucgggaguuagcucaagcgguuuaccu..... | 1   | 0 | val |
| .....gggucgggaguuagcucaag.....            | 1   | 0 | val |
| .....gggucgggaguuagcuAaag.....            | 1   | 1 | val |
| .....gggucgggaguuagcucaagc.....           | 1   | 0 | val |
| .....gggucgggaguuagcucaagcgg.....         | 10  | 0 | val |
| .....gggucgggaguuagcCcaagcgg.....         | 1   | 1 | val |
| .....gggucgggaguuagGuaagcgg.....          | 1   | 1 | val |
| .....gggucgggaguuagcucaagcgg.....         | 296 | 0 | val |
| .....gggucgggaguuagcucaagcGU.....         | 2   | 1 | val |
| .....gUgucgggaguuagcucaagcgg.....         | 1   | 1 | val |
| .....gggucgggaguuagcucaacCcg.....         | 1   | 1 | val |
| .....gggucgggaguuagcuAaagcgg.....         | 2   | 1 | val |
| .....gggCcgaguuagcucaagcgg.....           | 2   | 1 | val |
| .....gggucgggacUuagcucaagcgg.....         | 1   | 1 | val |
| .....gggAcggaguuagcucaagcgg.....          | 1   | 1 | val |
| .....gggucgggaguuagcucaagcggA.....        | 1   | 1 | val |
| .....gCgucgggaguuagcucaagcgg.....         | 1   | 1 | val |
| .....gggucgggaguuagcucaagcG.....          | 1   | 1 | val |
| .....gggucgggaguuagcucaagcUg.....         | 1   | 1 | val |
| .....gggucUgaguuagcucaagcgg.....          | 1   | 1 | val |
| .....gggucgggaguuagcucaCgcgg.....         | 2   | 1 | val |
| .....gggucgggaguuagcucaagcAg.....         | 1   | 1 | val |
| .....ggguUggaguuagcucaagcgg.....          | 1   | 1 | val |
| .....gggucgggaguuagUucaagcgg.....         | 2   | 1 | val |
| .....gggucgggaguuagcucaagcgg.....         | 1   | 1 | val |
| .....Uggucgggaguuagcucaagcgg.....         | 1   | 1 | val |
| .....gggucgggaguuagAucaagcgg.....         | 2   | 1 | val |
| .....gggucgggagCuagcucaagcgguu.....       | 2   | 1 | val |
| .....gggucgggaguuagAucaagcgguu.....       | 11  | 1 | val |
| .....gggucAgaguuagcucaagcgguu.....        | 1   | 1 | val |
| .....gggucgggaguuagcucaCgcgguu.....       | 11  | 1 | val |
| .....gggucgggaguuagcucaagAggu.....        | 4   | 1 | val |
| .....ggguuAggaguuagcucaagcgguu.....       | 1   | 1 | val |
| .....gggucgggaguuagcuGaaagcgguu.....      | 1   | 1 | val |
| .....gggucgggaguuagcAcaagcgguu.....       | 1   | 1 | val |
| .....gggCcgaguuagcucaagcgguu.....         | 1   | 1 | val |
| .....gggucgggaguuagcucaagcgguu.....       | 1   | 1 | val |

cuaccgggucggaguuagcucaagcgguuaccuccuacugccggacuucuaucuguccaucucugucgggguuucgagaccgcgggugcuuacugaccuuuuug

|                                         |      |   |     |
|-----------------------------------------|------|---|-----|
| .....gCgucggaguuagcucaagcgggu.....      | 2    | 1 | val |
| .....gggucggaguuagcucaaCcggu.....       | 2    | 1 | val |
| .....gUgucggaguuagcucaagcgggu.....      | 2    | 1 | val |
| .....gggucggaguuagcucaagcggC.....       | 8    | 1 | val |
| .....gggucggaguuagcucaagcUgu.....       | 6    | 1 | val |
| .....gggucggaguuagcuUaaagcgggu.....     | 1    | 1 | val |
| .....gggucggaguuagcGcaagcgggu.....      | 2    | 1 | val |
| .....gggucggaguuagcucaagcgggu.....      | 1246 | 0 | val |
| .....gggucggaguuagcucaagcGpu.....       | 1    | 1 | val |
| .....ggguUggaguuagcucaagcgggu.....      | 1    | 1 | val |
| .....gggucggaguuagcucaagcgggu.....      | 4    | 1 | val |
| .....gggGcggaguuagcucaagcgggu.....      | 8    | 1 | val |
| .....gAgucggaguuagcucaagcgggu.....      | 2    | 1 | val |
| .....gggucggaguuagcucaaUcggu.....       | 1    | 1 | val |
| .....Cgucggaguuagcucaagcgggu.....       | 1    | 1 | val |
| .....gggucggaguuagcucaagcggG.....       | 8    | 1 | val |
| .....gggucggaguuagcucaagGggu.....       | 1    | 1 | val |
| .....gggucggaguuagGuaagcgggu.....       | 2    | 1 | val |
| .....Uggucggaguuagcucaagcgggu.....      | 5    | 1 | val |
| .....gggucggaguuCgcucaagcgggu.....      | 1    | 1 | val |
| .....gggucggaguuagUucaagcgggu.....      | 3    | 1 | val |
| .....gggucggaguuagcucaagcggA.....       | 4    | 1 | val |
| .....gggucggaguuagcucUagcgggu.....      | 1    | 1 | val |
| .....gggucggaguuagcucaagcCgu.....       | 1    | 1 | val |
| .....gggucggaguuagcucaagcGcu.....       | 1    | 1 | val |
| .....gggucggaguuagcucaagUggu.....       | 1    | 1 | val |
| .....gggucggaguuagcucaagcAgu.....       | 3    | 1 | val |
| .....gggucggaguuagcGcaagcgggu.....      | 1    | 1 | val |
| .....gggucggaguuagcucaagcggguC.....     | 2    | 1 | val |
| .....gggucggCguuagcucaagcgggu.....      | 1    | 1 | val |
| .....gUgucggaguuagcucaagcgggu.....      | 1    | 1 | val |
| .....gggucggaguuagAuaagcgggu.....       | 1    | 1 | val |
| .....gggucggaguuagcucaCgcgggu.....      | 4    | 1 | val |
| .....gggucggaguuagcucaagGggu.....       | 1    | 1 | val |
| .....gggucggaguuagcCcaagcgggu.....      | 1    | 1 | val |
| .....gggucggaguuagcucaagcggG.....       | 1    | 1 | val |
| .....gggucggaguuagcucaagcgggu.....      | 280  | 0 | val |
| .....gggucggagCuagcucaagcgggu.....      | 2    | 1 | val |
| .....gggucggaguuagcuUaaagcgggu.....     | 1    | 1 | val |
| .....gggucggaguuagcucaagcggCu.....      | 1    | 1 | val |
| .....gggucggaguuagGuaagcgggu.....       | 1    | 1 | val |
| .....ggguAggaguuagcucaagcgggu.....      | 1    | 1 | val |
| .....gggucggaguuagcucaagcggG.....       | 1    | 1 | val |
| .....gggucggaguuagcuAaagcgggu.....      | 3    | 1 | val |
| .....gggucggaguuagcucaagcggguA.....     | 25   | 1 | val |
| .....gggucggaguuCgcucaagcgggu.....      | 2    | 1 | val |
| .....gggucggaguuagcucaagcggguU.....     | 11   | 1 | val |
| .....gggucggaguuagcucaagcggguua.....    | 60   | 0 | val |
| .....gggucggaguuagcucaagcggguAa.....    | 10   | 1 | val |
| .....gggucggaguuagAuaagcggguua.....     | 1    | 1 | val |
| .....gggucggaguuagcucaCgcggguua.....    | 2    | 1 | val |
| .....gggucggaguuagcuAaagcggguuac.....   | 1    | 1 | val |
| .....gggucggaguuagcucaagcggguuac.....   | 6    | 0 | val |
| .....gggucggaguuagcucaagcggguuacc.....  | 6    | 0 | val |
| .....gggucggaguuagcucaagcggguuaccA..... | 1    | 1 | val |
| .....gggucggaguuagcucaagcggguuaccu..... | 15   | 0 | val |
| .....gggucggaguuagAuaagcggguuaccu.....  | 1    | 1 | val |
| .....gggucggaguuagcucaagcggguuaccC..... | 1    | 1 | val |
| .....ggucggaguuagcucaagcgg.....         | 1    | 0 | val |
| .....ggucggaguuagcucaagcgggu.....       | 1    | 0 | val |
| .....Ugucggaguuagcucaagcgggu.....       | 1    | 1 | val |
| .....Cgucggaguuagcucaagcgggu.....       | 1    | 1 | val |
| .....ggucggaguuagcucaagcgggu.....       | 1    | 0 | val |
| .....ucggaguuagcucaagcgggu.....         | 1    | 0 | val |
| .....ggaguuagcucaagcgggu.....           | 10   | 0 | val |
| .....ggaguuagcucaagcggguA.....          | 1    | 1 | val |
| .....ggaguuagcucaagcgggu.....           | 1    | 0 | val |
| .....uuagcucaagcggguuaccucc.....        | 1    | 0 | val |
| .....uaccuccuacugccggacuucuu.....       | 1    | 0 | val |

cuaccgggucggaguuagcucaagcgguuaccuccuacugcgggacuuucuaucuguccaucugugcgggguuucgagaccgcggggucuuacugaccuuuuuag

|                                          |    |   |     |
|------------------------------------------|----|---|-----|
| .....accuccuacugcgggacuu.....            | 1  | 0 | val |
| .....accuccuacugcgggacuuucuaucuguc.....  | 1  | 0 | val |
| .....uucuaucuguccaucucug.....            | 1  | 0 | val |
| .....cucugugcgggguuucgagacc.....         | 1  | 0 | val |
| .....cugugcgggguuucgaga.....             | 1  | 0 | val |
| .....ugugcgggguuucgagac.....             | 1  | 0 | val |
| .....gugcgggguuucgagacA.....             | 1  | 1 | val |
| .....uucgagaccgcggggucuuacugaccuu.....   | 1  | 0 | val |
| .....ucgagaccgcggggucuuacugaccuu.....    | 2  | 0 | val |
| .....ucgagaccgcggggucuuacugaccuuuu.....  | 1  | 0 | val |
| .....cgagaccgcggggucuuacugaccuu.....     | 2  | 0 | val |
| .....cgagaccgcggggucuuacugaccuuuu.....   | 2  | 0 | val |
| .....cgagaccgcggggucuuacugaccuuuuUu..... | 1  | 1 | val |
| .....gagaccgcggggucuuacugacA.....        | 1  | 1 | val |
| .....gagaccgcggggucuuacugaccuu.....      | 1  | 0 | val |
| .....agaccgcggggucuuacugaccuA.....       | 1  | 1 | val |
| .....agaccgcggggucuuacugaccuu.....       | 2  | 0 | val |
| .....agaccgcggggucuuacugCccuuuu.....     | 1  | 1 | val |
| .....agaccgcggggucuuacugaccuuuu.....     | 1  | 0 | val |
| .....cgggggucuuacugacc.....              | 1  | 0 | val |
| .....cgggggucuuacugaccuu.....            | 1  | 0 | val |
| .....cgggggucuuacugaccuu.....            | 3  | 0 | val |
| .....cgggggucuuAaugaccuu.....            | 1  | 1 | val |
| .....cCggggucuuacugaccuu.....            | 2  | 1 | val |
| .....cgggggucuuacugCccuu.....            | 1  | 1 | val |
| .....cggggGgucuuacugaccuu.....           | 2  | 1 | val |
| .....cgggggucuuacugaccuuCu.....          | 1  | 1 | val |
| .....cgggggucAucugaccuu.....             | 1  | 1 | val |
| .....cgggggucuuGcugaccuu.....            | 1  | 1 | val |
| .....cgggggucuuacugaccuu.....            | 67 | 0 | val |
| .....Agggggucuuacugaccuu.....            | 1  | 1 | val |
| .....cgggggucuuacugaccuuuu.....          | 5  | 0 | val |
| .....cgggggucuuacugaccuuuC.....          | 1  | 1 | val |
| .....cgcAgggucuuacugaccuu.....           | 1  | 1 | val |
| .....cgggggucuuacugaccuuuA.....          | 5  | 1 | val |
| .....cgggggucuuacugaccuuCu.....          | 1  | 1 | val |
| .....cgggggucuuacugaccuuuAa.....         | 1  | 1 | val |
| .....ccgggucggaguuagcucaagcgg.....       | 1  | 0 | ku5 |
| .....ccgggucggaguuagcucaagcggG.....      | 1  | 1 | ku5 |
| .....Agggucggaguuagcucaagcgg.....        | 1  | 1 | ku5 |
| .....Agggucggaguuagcucaagcgg.....        | 1  | 1 | ku5 |
| .....cgggucggaguuagcucaagcgg.....        | 9  | 0 | ku5 |
| .....cgggucggaguuagcucaagcggg.....       | 13 | 0 | ku5 |
| .....cgggucggaguuagcucaagcgguu.....      | 1  | 0 | ku5 |
| .....cgggucggaguuagcucaagcgggA.....      | 2  | 1 | ku5 |
| .....cgggucggaguuagcucaagcggGu.....      | 1  | 1 | ku5 |
| .....gggucggaguuagcucaagcgg.....         | 1  | 0 | ku5 |
| .....gggucggaguuagcucaagcggA.....        | 1  | 1 | ku5 |
| .....gggucggaguuagcucaagcggg.....        | 3  | 0 | ku5 |
| .....gggucggaguuagcucaagcgguu.....       | 1  | 0 | ku5 |
| .....gggucggaguuagcucaagcgggAa.....      | 1  | 1 | ku5 |
| .....gggucggaguuagcucaagcggguu.....      | 1  | 0 | ku5 |
| .....cgggggucuuacugaccuu.....            | 2  | 0 | ku5 |
| .....cgggggucuuacugaccuA.....            | 1  | 1 | ku5 |
| .....cgggggucuuacugaccuu.....            | 1  | 0 | ku5 |
| .....cgggucggaguuagcucaagcgg.....        | 2  | 0 | k05 |
| .....cgggucggaguuagcucaagcgg.....        | 3  | 0 | k05 |
| .....cgggGcggaguuagcucaagcgg.....        | 1  | 1 | k05 |
| .....cgggucggaguuagcucaagcggC.....       | 1  | 1 | k05 |
| .....cgggucggaguuagcucaagcggg.....       | 5  | 0 | k05 |
| .....cgggucggaguuagcucaCgcggu.....       | 1  | 1 | k05 |
| .....cgggucggaguuagcucaagcgguu.....      | 1  | 0 | k05 |
| .....gggucggaguuagcucaagcgg.....         | 2  | 0 | k05 |
| .....gggucggaguuagUucaagcgg.....         | 1  | 1 | k05 |
| .....gggGcggaguuagcucaagcgg.....         | 1  | 1 | k05 |
| .....gggucggaguuagcucaagcggG.....        | 1  | 1 | k05 |
| .....gggucggaguuagcucaagcggA.....        | 1  | 1 | k05 |

cuaccgggucggaguuagcucaagcgguuaccuccuacugcggacuuucuaucuguccaucucugucgggguuucgagacccgcgggugcuuacugaccuuuuuag

|                                      |     |   |     |
|--------------------------------------|-----|---|-----|
| .....gggucggaguuagcucaagcgguu.....   | 9   | 0 | k05 |
| .....gggucggaguuagcucaagcgguu.....   | 13  | 0 | k05 |
| .....gggucggaguuagcucaagcggAu.....   | 1   | 1 | k05 |
| .....gggucggaguuagcucaagcggGua.....  | 1   | 1 | k05 |
| .....gggucggaguuagcucaagcgguuua..... | 3   | 0 | k05 |
| .....gggucggaguuagcucaagcgguuac..... | 1   | 0 | k05 |
| .....aagcgguuaccuccuacug.....        | 1   | 0 | k05 |
| .....accuccuacugcggacuuc.....        | 1   | 0 | k05 |
| .....cugugcugggguucgagacc.....       | 1   | 0 | k05 |
| .....cgcgggugcuuacugaccDu.....       | 1   | 1 | k05 |
| .....cgcgggAgcuuacugaccuu.....       | 1   | 1 | k05 |
| .....cgcgggugcuuacugaccuu.....       | 2   | 0 | k05 |
| .....cgcgggugcuuacugaccuuu.....      | 1   | 0 | k05 |
| .....gcgggugcuuacugaccuuuu.....      | 1   | 0 | k05 |
| ..accgggucggaguuagU.....             | 1   | 1 | s06 |
| ..accgggucggaguuagcucaagc.....       | 2   | 0 | s06 |
| ..accgggucggaguuagcucaagcgg.....     | 11  | 0 | s06 |
| ..accgggucggaguuagAucaagcgg.....     | 1   | 1 | s06 |
| ..accgggucggaguuagcucaagcgguu.....   | 22  | 0 | s06 |
| ..accgggucggaguuagcucaagcggA.....    | 2   | 1 | s06 |
| ..accgggucggaguuagcucaagcgguu.....   | 10  | 0 | s06 |
| ..accgggucggaguuagcucaagcggua.....   | 1   | 1 | s06 |
| ..accgggucggaguuagcucaagcgguuua..... | 3   | 0 | s06 |
| ..cccgggucggaguuagcucaagc.....       | 1   | 0 | s06 |
| ..cccgggucggaguuagcucaagcgg.....     | 2   | 0 | s06 |
| ..cccgggucggaguuagcucaUcggg.....     | 1   | 1 | s06 |
| ..cccgggucggaguuagcucaagcgg.....     | 13  | 0 | s06 |
| ..Accgggucggaguuagcucaagcgg.....     | 5   | 1 | s06 |
| ..cccgggucggaguuagcucaagcggA.....    | 2   | 1 | s06 |
| ..Accgggucggaguuagcucaagcgguu.....   | 10  | 1 | s06 |
| ..cccgggucggaguuagcucaagcgguu.....   | 15  | 0 | s06 |
| ..Uccgggucggaguuagcucaagcgguu.....   | 1   | 1 | s06 |
| ..cccgggucggaguuagcucaagcggAu.....   | 1   | 1 | s06 |
| ..Accgggucggaguuagcucaagcgguu.....   | 1   | 1 | s06 |
| ..cccgggucggaguuagcucaagcgguu.....   | 1   | 0 | s06 |
| ..ccgggucggaguuagcucaagc.....        | 1   | 0 | s06 |
| ..ccgggucggaguuagcucaagcgg.....      | 5   | 0 | s06 |
| ..ccgggCcgaguuagcucaagcgg.....       | 1   | 1 | s06 |
| ..ccgggucggaguuuaAcucaagcgg.....     | 1   | 1 | s06 |
| ..ccgggucggaguuagcucaaaAcgg.....     | 1   | 1 | s06 |
| ..Ucgggucggaguuagcucaagcgg.....      | 3   | 1 | s06 |
| ..cUgggucggaguuagcucaagcgg.....      | 1   | 1 | s06 |
| ..ccgggucggaguuagcucaagcgg.....      | 168 | 0 | s06 |
| ..ccgggucggaguuagcGcaagcgg.....      | 1   | 1 | s06 |
| ..Accgggucggaguuagcucaagcgg.....     | 1   | 1 | s06 |
| ..cGgggucggaguuagcucaagcgg.....      | 1   | 1 | s06 |
| ..ccgggucggaguuagcucaaUcgg.....      | 1   | 1 | s06 |
| ..ccgggucggaguuuaAcucaagcgguu.....   | 1   | 1 | s06 |
| ..ccgggucggaguuagcucaagcUgu.....     | 1   | 1 | s06 |
| ..cGgggucggaguuagcucaagcgguu.....    | 1   | 1 | s06 |
| ..ccgggucggaguuagcucaagcgguu.....    | 175 | 0 | s06 |
| ..ccgggucggaguuagcucaagcggUu.....    | 2   | 1 | s06 |
| ..ccgggucggaguuagcucaagcggA.....     | 7   | 1 | s06 |
| ..Accgggucggaguuagcucaagcgguu.....   | 1   | 1 | s06 |
| ..ccUggucggaguuagcucaagcgguu.....    | 3   | 1 | s06 |
| ..Ucgggucggaguuagcucaagcgguu.....    | 5   | 1 | s06 |
| ..cUgggucggaguuagcucaagcgguu.....    | 1   | 1 | s06 |
| ..ccgggucggaguuagcucaagcgguu.....    | 21  | 0 | s06 |
| ..ccgggucggaguuagcucaagcgguuG.....   | 1   | 1 | s06 |
| ..ccgggucggaguuagcucaagcggua.....    | 3   | 1 | s06 |
| ..ccgggucggaguuagcucaagcgguaa.....   | 5   | 1 | s06 |
| ..ccgggucggaguuagcucaagcgguuU.....   | 6   | 1 | s06 |
| ..Ucgggucggaguuagcucaagcgguuua.....  | 1   | 1 | s06 |
| ..ccgggucggaguuagcucaagcgguuua.....  | 2   | 0 | s06 |
| ..cgggucggaguuagcucaag.....          | 8   | 0 | s06 |
| ..cgggucggaguuagcucaagA.....         | 1   | 1 | s06 |
| ..cgggucggaguuagcucaagc.....         | 16  | 0 | s06 |
| ..cgggucggaguuagcucaagcg.....        | 52  | 0 | s06 |

cuaccgggucgggaguuagcucaagcgguuaccuccuacugcggacuuucuaucuguccaucucugugcgggguuucgagaccgcgggugcuuacugaccuuuuuag

|                                     |      |   |     |
|-------------------------------------|------|---|-----|
| .....cgggucgggaguuagcuUaagcg.....   | 1    | 1 | s06 |
| .....cgggucgggaguuagcucaagcA.....   | 1    | 1 | s06 |
| .....cgggucgggaguuagcucaagcU.....   | 1    | 1 | s06 |
| .....cggguUgggaguuagcucaagcg.....   | 1    | 1 | s06 |
| .....cgggucgggaguuagcuUaagcgg.....  | 2    | 1 | s06 |
| .....cgggucgggAuuagcucaagcgg.....   | 2    | 1 | s06 |
| .....cgggucgggaguuagcucaUgicgg..... | 3    | 1 | s06 |
| .....cgggucgggaguuagcucaagcUg.....  | 9    | 1 | s06 |
| .....cgggucgggaguuagcucaCgcgg.....  | 3    | 1 | s06 |
| .....cgggucggcGuuagcucaagcgg.....   | 1    | 1 | s06 |
| .....cgggucgggaguuagUucaagcgg.....  | 8    | 1 | s06 |
| .....cgggucgggaguuagcucaagUgg.....  | 3    | 1 | s06 |
| .....cgggucgggaguuAuccaagcgg.....   | 1    | 1 | s06 |
| .....cgggucgggaguuagcucaagcgcC..... | 3    | 1 | s06 |
| .....cgggucgggaguuagcucUagcgg.....  | 5    | 1 | s06 |
| .....cgggucgggaguuagGucaagcgg.....  | 1    | 1 | s06 |
| .....cgggucgggagucagcucaagcgg.....  | 4    | 1 | s06 |
| .....cggguAaggaguuagcucaagcgg.....  | 1    | 1 | s06 |
| .....cgggucgggaguuagcucaaUcgg.....  | 15   | 1 | s06 |
| .....cgggCcgaguuagcucaagcgg.....    | 4    | 1 | s06 |
| .....cUggucgggaguuagcucaagcgg.....  | 2    | 1 | s06 |
| .....cgggucgUaguuagcucaagcgg.....   | 1    | 1 | s06 |
| .....Ggggucgggaguuagcucaagcgg.....  | 5    | 1 | s06 |
| .....Ugggucgggaguuagcucaagcgg.....  | 5    | 1 | s06 |
| .....cgggucgggaguuagcucaaCcg.....   | 2    | 1 | s06 |
| .....cgggucgggaguuagcucCagcgg.....  | 4    | 1 | s06 |
| .....cgggucgggAuuagcucaagcgg.....   | 1    | 1 | s06 |
| .....cgggucgggaguuAUucaagcgg.....   | 6    | 1 | s06 |
| .....cgggucgggaguuagcuAaagcgg.....  | 1    | 1 | s06 |
| .....cgggucgggaguuagcucaagcgg.....  | 2642 | 0 | s06 |
| .....cAggucgggaguuagcucaagcgg.....  | 1    | 1 | s06 |
| .....cgggucgggaguuagcucaagcgu.....  | 16   | 1 | s06 |
| .....cgAgucgggaguuagcucaagcgg.....  | 1    | 1 | s06 |
| .....cgUgucgggaguuagcucaagcgg.....  | 1    | 1 | s06 |
| .....cgggGcgaguuagcucaagcgg.....    | 4    | 1 | s06 |
| .....cCggucgggaguuagcucaagcgg.....  | 1    | 1 | s06 |
| .....cgCgucgggaguuagcucaagcgg.....  | 1    | 1 | s06 |
| .....cgggucgggaguuGgcucaagcgg.....  | 1    | 1 | s06 |
| .....cgggucgggaguuAucucaagcgg.....  | 4    | 1 | s06 |
| .....cgggucgggaguuagcAcaagcgg.....  | 2    | 1 | s06 |
| .....cgggucgggaguuagcuGgcgg.....    | 1    | 1 | s06 |
| .....cgggAcgggaguuagcucaagcgg.....  | 1    | 1 | s06 |
| .....cgggucgggaguuagcucaagcga.....  | 5    | 1 | s06 |
| .....cgggucgggagGuaagcucaagcgg..... | 2    | 1 | s06 |
| .....cgggucgggaguuagcucGagcgg.....  | 2    | 1 | s06 |
| .....cgggucgggaguuagAucaagcgg.....  | 28   | 1 | s06 |
| .....cgggucgggaguuCgcucaagcgg.....  | 1    | 1 | s06 |
| .....Agggucgggaguuagcucaagcgg.....  | 5    | 1 | s06 |
| .....cgggucggGguagcucaagcgg.....    | 1    | 1 | s06 |
| .....cgggucgggaguuagcuAaagcgg.....  | 2    | 1 | s06 |
| .....cgggucgggaguuagcucaaAicgg..... | 1    | 1 | s06 |
| .....cgggucgggaguuagcucGagcgg.....  | 3    | 1 | s06 |
| .....cgggucgggaguuagcucCagcgg.....  | 2    | 1 | s06 |
| .....cgggucgggaguuagAucaagcgg.....  | 58   | 1 | s06 |
| .....cggUcgggaguuagcucaagcgg.....   | 4    | 1 | s06 |
| .....Agggucgggaguuagcucaagcgg.....  | 2    | 1 | s06 |
| .....cgggucgggaguuagcucaagcCgu..... | 1    | 1 | s06 |
| .....cCggucgggaguuagcucaagcgg.....  | 2    | 1 | s06 |
| .....cgggucgggaguuUgcucaagcgg.....  | 2    | 1 | s06 |
| .....cgggGcgaguuagcucaagcgg.....    | 19   | 1 | s06 |
| .....cgggucgggaguuagcucaCgcgg.....  | 7    | 1 | s06 |
| .....cgggucgggaguuagGucaagcgg.....  | 1    | 1 | s06 |
| .....cgggucgggagCuagcucaagcgg.....  | 1    | 1 | s06 |
| .....cgggucgggagGuaagcucaagcgg..... | 1    | 1 | s06 |
| .....cgggucgggaguuagcucaagcggG..... | 1    | 1 | s06 |
| .....Ugggucgggaguuagcucaagcgg.....  | 34   | 1 | s06 |
| .....cgggucggcGuuagcucaagcgg.....   | 1    | 1 | s06 |
| .....cgggucggGguagcucaagcgg.....    | 1    | 1 | s06 |
| .....cgggucgggagucagcucaagcgg.....  | 5    | 1 | s06 |

cuaccgggucgggaguuagcucaagcgguuaccuccuacugcgggacuuucuaucuguccaucucugugcgggguuucgagaccgcgggugcuuacugaccuuuuuug

|                                       |      |   |     |
|---------------------------------------|------|---|-----|
| .....cgggucgggaguuagcCcaagcgggu.....  | 2    | 1 | s06 |
| .....Ggggucgggaguuagcucaagcgggu.....  | 8    | 1 | s06 |
| .....cgggucAggaguuagcucaagcgggu.....  | 1    | 1 | s06 |
| .....cUggucgggaguuagcucaagcgggu.....  | 12   | 1 | s06 |
| .....cgggucgggaguuagcuGaaagcgggu..... | 1    | 1 | s06 |
| .....cgggucgggaguuagcucaagcggAu.....  | 3    | 1 | s06 |
| .....cgggucGggaguuagcucaagcgggu.....  | 1    | 1 | s06 |
| .....cgggucgggAuuagcucaagcgggu.....   | 1    | 1 | s06 |
| .....cgggucgggaguuagcucaagcggCu.....  | 1    | 1 | s06 |
| .....cgUgucgggaguuagcucaagcgggu.....  | 4    | 1 | s06 |
| .....cgggucgggaguuagcucaagUgggu.....  | 6    | 1 | s06 |
| .....cgggucgggaguuagcucaagcggUu.....  | 14   | 1 | s06 |
| .....cgggucgggaguuagcucaagcggUg.....  | 19   | 1 | s06 |
| .....cgggucgggaguuagcuUaagcgggu.....  | 8    | 1 | s06 |
| .....cgggucAggaguuagcucaagcgggu.....  | 1    | 1 | s06 |
| .....cgggucgggaguuagcucaGgcgggu.....  | 2    | 1 | s06 |
| .....cgggucgggaguuagcucUagcgggu.....  | 13   | 1 | s06 |
| .....cgggucgggaguuagcucaagcggC.....   | 21   | 1 | s06 |
| .....cgggucgggaguuagcucaagcgggu.....  | 7196 | 0 | s06 |
| .....cgAgucgggaguuagcucaagcgggu.....  | 1    | 1 | s06 |
| .....cggCucgggaguuagcucaagcgggu.....  | 2    | 1 | s06 |
| .....cgggucgggaguuagcAaagcgggu.....   | 1    | 1 | s06 |
| .....cgggucgggaguuAacucaagcgggu.....  | 2    | 1 | s06 |
| .....cgggucgUaguuagcucaagcgggu.....   | 1    | 1 | s06 |
| .....cAggucgggaguuagcucaagcgggu.....  | 3    | 1 | s06 |
| .....cgggucgggaguuagcucaagcggA.....   | 136  | 1 | s06 |
| .....cgggucgggaguuagcucaUgcgggu.....  | 7    | 1 | s06 |
| .....cgggucgggaguuGgcucaagcgggu.....  | 2    | 1 | s06 |
| .....cgggucgggaguuagcucaagAggu.....   | 1    | 1 | s06 |
| .....cgggucgggaguuAagcucaagcgggu..... | 1    | 1 | s06 |
| .....cgggucUgaguuagcucaagcgggu.....   | 2    | 1 | s06 |
| .....cgggucgggAuuagcucaagcgggu.....   | 1    | 1 | s06 |
| .....cgggAcggaguuagcucaagcgggu.....   | 2    | 1 | s06 |
| .....cgggucUggaguuagcucaagcgggu.....  | 3    | 1 | s06 |
| .....cgggucgggAuuagcucaagcgggu.....   | 8    | 1 | s06 |
| .....cgggucgggaguuagUucaagcgggu.....  | 16   | 1 | s06 |
| .....cgggucgggaguuagcucaaaCcggu.....  | 4    | 1 | s06 |
| .....cgggucgggaguuUucaagcgggu.....    | 9    | 1 | s06 |
| .....cgggCcgaguuagcucaagcgggu.....    | 3    | 1 | s06 |
| .....cgggucgggaguuagcucaaUcggu.....   | 31   | 1 | s06 |
| .....cgggucgggaguuagcucaagcggguC..... | 2    | 1 | s06 |
| .....cgggucgggaguuagGucaagcgggu.....  | 1    | 1 | s06 |
| .....cgggucgCaguuagcucaagcgggu.....   | 1    | 1 | s06 |
| .....cgggucgggaguuagcucaCgcgggu.....  | 1    | 1 | s06 |
| .....cgggucgggaguuagcucaagcgggu.....  | 683  | 0 | s06 |
| .....cgggucgggaguuUucaagcgggu.....    | 1    | 1 | s06 |
| .....cgggCcgaguuagcucaagcgggu.....    | 1    | 1 | s06 |
| .....cgggucgggaguuagcucaaCcggu.....   | 1    | 1 | s06 |
| .....cgggucgggaguuagcucaagcCguu.....  | 1    | 1 | s06 |
| .....cgggucgggaguuagcucaagUgggu.....  | 2    | 1 | s06 |
| .....cgggucgggaguuagUucaagcgggu.....  | 1    | 1 | s06 |
| .....cgggucgggaguuagcucaaAcgggu.....  | 1    | 1 | s06 |
| .....cgggucgggAuuagcucaagcgggu.....   | 1    | 1 | s06 |
| .....cgggucgggaguuagcucUagcgggu.....  | 1    | 1 | s06 |
| .....cgggucgggaguuagcuUaagcgggu.....  | 1    | 1 | s06 |
| .....cgggGcggaguuagcucaagcgggu.....   | 1    | 1 | s06 |
| .....cgggucgggaguuagcuAaagcgggu.....  | 1    | 1 | s06 |
| .....cgggucgggaguuagcucaaUcggu.....   | 4    | 1 | s06 |
| .....Ugggucgggaguuagcucaagcgggu.....  | 2    | 1 | s06 |
| .....cgggucgggaguuagcucaagcggAu.....  | 7    | 1 | s06 |
| .....cgggucgggaguuagcucaagcUguu.....  | 1    | 1 | s06 |
| .....Ggggucgggaguuagcucaagcgggu.....  | 5    | 1 | s06 |
| .....cgggucgggaguuagcucaagcggCu.....  | 1    | 1 | s06 |
| .....cgggucgggaguuagAucaagcgggu.....  | 5    | 1 | s06 |
| .....cgggucgggaguuagcucaagcggUu.....  | 2    | 1 | s06 |

cuaccgggucgggaguuagcucaagcgguuuaccuccuacugccggacuucuaucuguccaucucugcugggguuucgagaccgcgggugcuuacugaccuuuuuag

|                                         |     |   |     |
|-----------------------------------------|-----|---|-----|
| .....cggguUggaguuagcucaagcgguu.....     | 1   | 1 | s06 |
| .....cgggucgggaguuagcucaagcgguG.....    | 21  | 1 | s06 |
| .....cgggucgggaguuagcucaagcgguaA.....   | 455 | 1 | s06 |
| .....cgggucgggaguuagcucaagcgguuG.....   | 2   | 1 | s06 |
| .....cgggucgggaguuagcucaagcgguuA.....   | 18  | 0 | s06 |
| .....cgggucgggaguuagcucaagcggAua.....   | 2   | 1 | s06 |
| .....cgggucgggaguuagcucaagcgguuC.....   | 1   | 1 | s06 |
| .....cgggucgggaguuagcucaagcgguuU.....   | 100 | 1 | s06 |
| .....cgggucgggaguuagcucaagcgguaA.....   | 156 | 1 | s06 |
| .....cgggucgggaguuagcucaagcgguGa.....   | 4   | 1 | s06 |
| .....cgggucgggaguuagcucaagcgguuU.....   | 1   | 1 | s06 |
| .....cgggucgggaguuagcucaagcgguuA.....   | 1   | 1 | s06 |
| .....cgggucgggaguuagcucaagcgguuac.....  | 1   | 0 | s06 |
| .....cgggucgggaguuagcucaagcgguuacc..... | 1   | 0 | s06 |
| .....gggucgggaguuagcucaagc.....         | 2   | 0 | s06 |
| .....gggucgggaguuagcucaagc.....         | 1   | 0 | s06 |
| .....gggucgggaguuagcucaagc.....         | 1   | 1 | s06 |
| .....gggucgggaguuagcucaagc.....         | 1   | 1 | s06 |
| .....gggucgggaguuagcucaagc.....         | 1   | 1 | s06 |
| .....gggucgggaguuagcucaagc.....         | 65  | 0 | s06 |
| .....gggucgggaguuagcucaUgcgg.....       | 1   | 1 | s06 |
| .....gUgcgggaguuagcucaagcgg.....        | 1   | 1 | s06 |
| .....gggucgggaguuagcucaagcgg.....       | 1   | 1 | s06 |
| .....gggucgggaguuagcucaagcggA.....      | 1   | 1 | s06 |
| .....gggucgggaguuagcucaaUcgg.....       | 1   | 1 | s06 |
| .....gggucgggaguuagcucaagcgg.....       | 1   | 1 | s06 |
| .....gggucgggaguuagcucaagcgg.....       | 308 | 0 | s06 |
| .....Uggucgggaguuagcucaagcgg.....       | 1   | 1 | s06 |
| .....gggucgggaguuUcuaagcgg.....         | 1   | 1 | s06 |
| .....Cggucgggaguuagcucaagcgg.....       | 7   | 1 | s06 |
| .....gggucgggaguuUgcuaagcgg.....        | 1   | 1 | s06 |
| .....Cggucgggaguuagcucaagcgguu.....     | 1   | 1 | s06 |
| .....gggGcgggaguuagcucaagcgguu.....     | 1   | 1 | s06 |
| .....gggucgggaguuagcucaagcgguC.....     | 2   | 1 | s06 |
| .....gggucgggaguuagcucaagcggGu.....     | 1   | 1 | s06 |
| .....gggucgggaguuagcucCagcgguu.....     | 1   | 1 | s06 |
| .....gggucgggaguuagcucaagcgguu.....     | 138 | 0 | s06 |
| .....gggucgggaguuagcucaUgcgguu.....     | 1   | 1 | s06 |
| .....gggucgggaguuagcucaagcgguaA.....    | 26  | 1 | s06 |
| .....ggguUggaguuagcucaagcgguu.....      | 1   | 1 | s06 |
| .....gggucgggaguuagcucaagcgguG.....     | 1   | 1 | s06 |
| .....gggucgggaguuagcucaaUcgguu.....     | 2   | 1 | s06 |
| .....gggucgggaguuagcucaagcgguuA.....    | 14  | 0 | s06 |
| .....gggucgggaguuagcucaagcgguaA.....    | 4   | 1 | s06 |
| .....gggucgggaguuagcucaagcgguuU.....    | 35  | 1 | s06 |
| .....gggucgggaguuagcucaagcgguuac.....   | 2   | 0 | s06 |
| .....gggucgggaguuagcucaagcgguuacc.....  | 2   | 0 | s06 |
| .....ggucgggaguuagcucaagcgg.....        | 1   | 0 | s06 |
| .....Cgucgggaguuagcucaagcgg.....        | 2   | 1 | s06 |
| .....cggaguuagcucaagcgg.....            | 3   | 0 | s06 |
| .....cggaguuagcucaagcggA.....           | 1   | 1 | s06 |
| .....ggaguuagcucaagcgg.....             | 1   | 0 | s06 |
| .....ggaguuagcucaagcgguu.....           | 1   | 0 | s06 |
| .....ggaguuagcucaagcgguaA.....          | 1   | 1 | s06 |
| .....gcucaagcgguuaccucc.....            | 1   | 0 | s06 |
| .....cgguuaccuccuacugccggacuucua.....   | 1   | 0 | s06 |
| .....uaccuccuacugccggacu.....           | 1   | 0 | s06 |
| .....uaccuccuacugccggacuu.....          | 2   | 0 | s06 |
| .....uaccuccuacugccggacuuuc.....        | 3   | 0 | s06 |
| .....uaccuccuacugccggacuuuc.....        | 8   | 0 | s06 |
| .....uaUcuccuacugccggacuuuc.....        | 1   | 1 | s06 |
| .....uaccucUcuaugccggacuuucua.....      | 1   | 1 | s06 |
| .....uaccuccuacugccggacuuucua.....      | 1   | 0 | s06 |
| .....ucucugucgugguuucgagacc.....        | 1   | 0 | s06 |
| .....ucgagaccgcgggCgcu.....             | 1   | 1 | s06 |
| .....cgagaccgcgggugcuuacugac.....       | 1   | 0 | s06 |
| .....cgcgggugcuuacugacc.....            | 2   | 0 | s06 |
| .....cgcgggugcuuacugUcc.....            | 1   | 1 | s06 |
| .....cgcgggugcuuacugaccu.....           | 11  | 0 | s06 |







cuaccgggucggaguagcucaagcgguuaccuccuacugcgggacuuuauucuguccaucugugcgggguuucgagaccgcggggucuuacugaccuuuuuug

|                                     |     |   |     |
|-------------------------------------|-----|---|-----|
| .....gaccgcgggugcuuacugac.....      | 1   | 0 | HeL |
| .....gaccgcgggugcuuacugacc.....     | 1   | 0 | HeL |
| .....gaccgcgggugcuuacugaccuuu....   | 1   | 0 | HeL |
| .....gaccgcgggugcuuacugaccuuuuu..   | 1   | 0 | HeL |
| .....accgcgggugcuuacugac.....       | 2   | 0 | HeL |
| .....accgcgggugcuuacugacc.....      | 3   | 0 | HeL |
| .....accgcgggugcuuacugaccuu....     | 1   | 0 | HeL |
| .....accgcgggugcuuacugaccuuu....    | 3   | 0 | HeL |
| .....accgcgggugcuuacugaccuuuu...    | 1   | 0 | HeL |
| .....ccgcgggugcuuacugac.....        | 2   | 0 | HeL |
| .....ccgcgggugcuuacugaccuuu....     | 2   | 0 | HeL |
| .....cgcgggugcuuacugac.....         | 1   | 0 | HeL |
| .....cgcgggugcuuacugaccuuu....      | 3   | 0 | HeL |
| .....cgcgggugcuuacugacc.....        | 5   | 0 | HeL |
| .....cCcgggugcuuacugacc.....        | 1   | 1 | HeL |
| .....cgcgggugcuuacugacc.....        | 4   | 0 | HeL |
| .....cgcgggugcuuacuUacc.....        | 1   | 1 | HeL |
| .....cgcgggugcuuacugaccu....        | 4   | 0 | HeL |
| .....cgcgggugcuuacugaccAu....       | 1   | 1 | HeL |
| .....cgcgggugcuuacugaccUuu....      | 1   | 1 | HeL |
| .....cgcgggugcuuacugaccuC....       | 1   | 1 | HeL |
| .....cgcAggugcuuacugaccuu....       | 2   | 1 | HeL |
| .....cgcgggugcuuacugaccuu....       | 18  | 0 | HeL |
| .....cgcgggugcuuacugaccAu....       | 1   | 1 | HeL |
| .....cgcgggugUuuacugaccuuu....      | 1   | 1 | HeL |
| .....cgcgggugcuuacugaAccuu....      | 1   | 1 | HeL |
| .....cgcgggugcuuacugaccuuu....      | 1   | 1 | HeL |
| .....cgcgggugcuuAAugaccuuu....      | 1   | 1 | HeL |
| .....cgcgggugcuuacCgaccuuu....      | 1   | 1 | HeL |
| .....cgcgggugcuuacugaccuuC....      | 1   | 1 | HeL |
| .....Ugcgggugcuuacugaccuuu....      | 1   | 1 | HeL |
| .....cgcgggugcuuacugaccAuuu....     | 2   | 1 | HeL |
| .....cgcgggugcuuacugaccuuG....      | 1   | 1 | HeL |
| .....cgcgggugcuuacugCccuuu....      | 1   | 1 | HeL |
| .....cgcgggugcuuacugaccuAu....      | 6   | 1 | HeL |
| .....cgcgggugcuuacugaccuuu....      | 274 | 0 | HeL |
| .....cgcgggugcuuacuUaccuuu....      | 2   | 1 | HeL |
| .....cgcgggugcuuacugaccuuA....      | 20  | 1 | HeL |
| .....cgcgggugcuuacugaccUuuu....     | 1   | 1 | HeL |
| .....cgcggUugcuuacugaccuuu....      | 2   | 1 | HeL |
| .....cgcgggugcuCacugaccuuu....      | 1   | 1 | HeL |
| .....cgcgggugcuuacugaccCuuu....     | 2   | 1 | HeL |
| .....cgcgggugcuuacugaccuuuA....     | 4   | 1 | HeL |
| .....cgcgggugcuuacugaccuuAu....     | 1   | 1 | HeL |
| .....cgcgggugcuuacugaccuuuu....     | 6   | 0 | HeL |
| .....gcgggugcuuacugaccuuu....       | 2   | 0 | HeL |
| .....gcgggugcuuacugaccuuuG....      | 1   | 1 | HeL |
| .....ggugcuuacugaccuuu....          | 3   | 0 | HeL |
| .....accgggucggaguagcucaagcgguu.... | 1   | 0 | ku4 |
| .....ccgggucggaguagcucaagcgg....    | 3   | 0 | ku4 |
| .....cgggucggaguagcucaagcgg....     | 1   | 0 | ku4 |
| .....cgggucggaguagcucaagcggg....    | 2   | 1 | ku4 |
| .....cgggucggaguagcucaagcggg....    | 5   | 0 | ku4 |
| .....cgggucggaguagUucaag....        | 1   | 1 | ku4 |
| .....cgggucggaguagcucaag....        | 6   | 0 | ku4 |
| .....cgggCcggauguagcucaagc....      | 1   | 1 | ku4 |
| .....cgggucggaguagcucaagc....       | 2   | 0 | ku4 |
| .....cgggucggaguagcucaagA....       | 1   | 1 | ku4 |
| .....cgggucggaguagcucCagcg....      | 1   | 1 | ku4 |
| .....cgggCcggauguagcucaagcgg....    | 1   | 1 | ku4 |
| .....cgggucggaguagcucaagcgg....     | 21  | 0 | ku4 |
| .....cgggucggaguagcCcaagcgg....     | 1   | 1 | ku4 |
| .....cgggucggagGuagcucaagcgg....    | 1   | 1 | ku4 |
| .....Ggggucggaguagcucaagcgg....     | 2   | 1 | ku4 |
| .....cgggucggaguagcucaCgcgg....     | 2   | 1 | ku4 |
| .....cgggucggaguagcucaagcgg....     | 130 | 0 | ku4 |
| .....cgggucggaguagcucaagcggU....    | 1   | 1 | ku4 |
| .....cgggucggaguagcucaagcggA....    | 1   | 1 | ku4 |

cuaccgggucgggaguuagcucaagcgguuaccuccuacugcggacuuucuaucuguccaucucugucgggguuucgagaccgcgggugcuuacugaccuuuuuag

|                                        |     |   |     |
|----------------------------------------|-----|---|-----|
| .....cgggucgAaguuagcucaagcgg.....      | 1   | 1 | ku4 |
| .....cgggucgggaguuagcucaaCcggu.....    | 2   | 1 | ku4 |
| .....cgggucgggaguuagcucaagcgggu.....   | 304 | 0 | ku4 |
| .....cgggucgggaguuagcucaaUcggu.....    | 1   | 1 | ku4 |
| .....cgggucgggaguuagLucaagcgggu.....   | 2   | 1 | ku4 |
| .....cgggGcggaguuagcucaagcgggu.....    | 1   | 1 | ku4 |
| .....cgggucgggaguuagcucaCgcggu.....    | 4   | 1 | ku4 |
| .....cgggucgggaguuagcucaagcggC.....    | 6   | 1 | ku4 |
| .....cCggucgggaguuagcucaagcgggu.....   | 1   | 1 | ku4 |
| .....cgggucgggaguuagcucaUcggu.....     | 2   | 1 | ku4 |
| .....cgggucgggagCuagcucaagcgggu.....   | 1   | 1 | ku4 |
| .....cgggucgggaguuagcucaagcggG.....    | 12  | 1 | ku4 |
| .....cgggucgggaguuagcucaagcggA.....    | 19  | 1 | ku4 |
| .....cgggucgggaguuagcuAaagcgggu.....   | 1   | 1 | ku4 |
| .....cgggAcggaguuagcucaagcgggu.....    | 1   | 1 | ku4 |
| .....cgggucgggaguuagcucCagcgggu.....   | 2   | 1 | ku4 |
| .....Ggggucgggaguuagcucaagcgggu.....   | 2   | 1 | ku4 |
| .....cgggucgggagGuaagcucaagcgggu.....  | 2   | 1 | ku4 |
| .....cgggucgggaguuagcucaagcggCu.....   | 2   | 1 | ku4 |
| .....cgggucgggaguuagcucaagcggGu.....   | 4   | 1 | ku4 |
| .....cgggucgggaguuagcucaagcggguC.....  | 1   | 1 | ku4 |
| .....cgggGcggaguuagcucaagcggguu.....   | 2   | 1 | ku4 |
| .....cgggucgggaguuagcucaagcggguG.....  | 1   | 1 | ku4 |
| .....cgggucgggaguuagcucaagcggguA.....  | 40  | 1 | ku4 |
| .....cgggucgggaguuagcucaagcggguA.....  | 5   | 1 | ku4 |
| .....cgggucgggaguuagcucaagcggguu.....  | 89  | 0 | ku4 |
| .....cgggucgggaguuagcucaCgcgguu.....   | 1   | 1 | ku4 |
| .....cgggucgggaguuagcucaagcggguua..... | 7   | 0 | ku4 |
| .....cgggucgggaguuagcucaagcggguAa..... | 4   | 1 | ku4 |
| .....cgggucgggaguuagcucaagcggguuU..... | 19  | 1 | ku4 |
| .....gggucgggaguuagcucaag.....         | 1   | 0 | ku4 |
| .....gggGcgggaguuagcucaagcgg.....      | 1   | 1 | ku4 |
| .....gggucgggaguuagcucCagcgg.....      | 1   | 1 | ku4 |
| .....gggucgggaguuagcucaCgcg.....       | 1   | 1 | ku4 |
| .....gggucgggaguuagcCcaagcgg.....      | 1   | 1 | ku4 |
| .....gggucgggaguuagcucaaCcg.....       | 1   | 1 | ku4 |
| .....gggucgggaguuagcucaagcgg.....      | 54  | 0 | ku4 |
| .....gggucgggaguuagUucaagcgg.....      | 1   | 1 | ku4 |
| .....gggucgggagGuaagcucaagcgg.....     | 1   | 1 | ku4 |
| .....gggucgggaguuagcCcaagcgggu.....    | 1   | 1 | ku4 |
| .....gggucgggaguuagcucaaCcggu.....     | 1   | 1 | ku4 |
| .....gggucgggaguuagcucaaUcggu.....     | 2   | 1 | ku4 |
| .....gggCcgaguuagcucaagcgggu.....      | 1   | 1 | ku4 |
| .....gggucgggaguuagcucaagcgggu.....    | 334 | 0 | ku4 |
| .....gggucgggaguuagcucaagcggG.....     | 26  | 1 | ku4 |
| .....gggucgggaguuagcucaCgcggu.....     | 1   | 1 | ku4 |
| .....gggucgggaguuagcuAaagcgggu.....    | 1   | 1 | ku4 |
| .....gggucgggagLuagcucaagcgggu.....    | 1   | 1 | ku4 |
| .....gggUAggaguuagcucaagcgggu.....     | 1   | 1 | ku4 |
| .....gggucgggaguuagcucCagcgggu.....    | 7   | 1 | ku4 |
| .....gggucgggaguuagcucaagcggA.....     | 16  | 1 | ku4 |
| .....gggucgggaguuagGuaagcgggu.....     | 1   | 1 | ku4 |
| .....gggucgggaguuagcucaagcggC.....     | 13  | 1 | ku4 |
| .....gggucgggaguuagcucaagcggCu.....    | 4   | 1 | ku4 |
| .....gggucgggaguuagcucaagcggguA.....   | 1   | 1 | ku4 |
| .....gggucgggaguuagcucCagcggguu.....   | 1   | 1 | ku4 |
| .....gggucgggaguuagcucaagcggguA.....   | 80  | 1 | ku4 |
| .....gggucgggaguuagcucaagcggGu.....    | 6   | 1 | ku4 |
| .....gggucgggaguuagcucaagcggguG.....   | 1   | 1 | ku4 |
| .....gggGcgggaguuagcucaagcggguu.....   | 2   | 1 | ku4 |
| .....gggucgggaguuagcucaagcggguC.....   | 1   | 1 | ku4 |
| .....gggucgggaguuagcucaagcggguu.....   | 92  | 0 | ku4 |
| .....gggucgggaguuagcucaagcggGu.....    | 2   | 1 | ku4 |
| .....Uggucgggaguuagcucaagcggguua.....  | 1   | 1 | ku4 |
| .....gggucgggaguuagcucaagcggguAa.....  | 28  | 1 | ku4 |
| .....gggucgggaguuagcucaagcggguuU.....  | 46  | 1 | ku4 |
| .....gggucgggaguuagcucaagcggguua.....  | 15  | 0 | ku4 |
| .....gggucgggaguuagcucaagcggguuac..... | 1   | 0 | ku4 |
| .....gggucgggaguuagcucaagcggguuaA..... | 1   | 1 | ku4 |

cuaccgggucggaguuagcucaagcgguuaccuccucaugccggacuucuaucuguccaucucugucgggguuucgagaccgcggggucuuacugaccuuuuuag

|                                       |    |   |     |
|---------------------------------------|----|---|-----|
| .....gggucggaguuagcucaagcgguuacU..... | 1  | 1 | ku4 |
| .....gggucggaguuagcucaagcgguuacc..... | 2  | 0 | ku4 |
| .....gggucggaguuagcucaagcgguuUcu..... | 1  | 1 | ku4 |
| .....uaccuccucaugccggacuucuaucug..... | 1  | 0 | ku4 |
| .....accuccucaugccggacuucuu.....      | 1  | 0 | ku4 |
| .....cugucgugggguucgagaa.....         | 1  | 0 | ku4 |
| .....agaaccgcgggucuuacugaccuuuu.....  | 1  | 0 | ku4 |
| .....cgAgggugcuuacugacc.....          | 1  | 1 | ku4 |
| .....cgcgggugcuuacugacc.....          | 2  | 0 | ku4 |
| .....cgcgggugcuuacugaccuu.....        | 16 | 0 | ku4 |
| .....cgcgggugcuuacugaccuuG.....       | 1  | 1 | ku4 |
| .....cgcgggugcuuacugaccuuA.....       | 7  | 1 | ku4 |
| .....cgcgggCgcuuacugaccuu.....        | 3  | 1 | ku4 |
| .....cgcgggugcuuacugCccuu.....        | 1  | 1 | ku4 |
| .....cgcgggugcuuacugaccuu.....        | 1  | 1 | ku4 |
| .....cgcgggugcuuacUaccuu.....         | 1  | 1 | ku4 |
| .....cgcgggugcuuacugaccuu.....        | 62 | 0 | ku4 |
| .....cgcgggugcuuacugaccuuu.....       | 4  | 0 | ku4 |
| .....cgggucggaguuagcucaagcgggu.....   | 3  | 0 | s07 |
| .....cgggucggaguuagcucaagcggua.....   | 1  | 1 | s07 |
| .....cgggucggaguuagcucaagcga.....     | 1  | 1 | k08 |
| .....cgggucggaguuagcucaagcgggu.....   | 5  | 0 | k08 |
| .....gggucggaguuagcucaagcgggu.....    | 2  | 0 | k08 |
| .....gggucggaguuagcucaagcgguu.....    | 1  | 0 | k08 |
| .....uccaucucugucguggggu.....         | 1  | 0 | k08 |
| .....cgcgggugcuuacuaAaccuu.....       | 1  | 1 | k08 |
| .....cgcgggugcuuacugaccuu.....        | 2  | 0 | k08 |
| .....cgcgggugcuuacugaccuuu.....       | 2  | 0 | k08 |
| .....cgcgggugcuuacugacAuuu.....       | 1  | 1 | k08 |
| .....accgggucggaguuagc.....           | 3  | 0 | s10 |
| .....accgggucggaguuagcu.....          | 1  | 0 | s10 |
| .....accgggucggaguuagcucaag.....      | 1  | 0 | s10 |
| .....accgggucggaguuagcucaagc.....     | 1  | 0 | s10 |
| .....accgggucggaguuagcucaagcgu.....   | 1  | 1 | s10 |
| .....accgggucggaguuagcucaagcgg.....   | 25 | 0 | s10 |
| .....acUcgggucggaguuagcucaagcgg.....  | 1  | 1 | s10 |
| .....accgggucggagCuagcucaagcgggu..... | 1  | 1 | s10 |
| .....accgggucggaguuagcucaagcga.....   | 2  | 1 | s10 |
| .....accgggucggaguuagcucaagcgggu..... | 22 | 0 | s10 |
| .....accgggucggaguuagcucaagcgguu..... | 8  | 0 | s10 |
| .....accgggucggaguuagcucaagcguuu..... | 1  | 1 | s10 |
| .....ccgggucggaguuagcucaagc.....      | 1  | 0 | s10 |
| .....ccgggucggaguuagcucaagcgg.....    | 12 | 0 | s10 |
| .....Accgggucggaguuagcucaagcgg.....   | 21 | 1 | s10 |
| .....Ucgggucggaguuagcucaagcgg.....    | 1  | 1 | s10 |
| .....ccgggGcggaguuagcucaagcgg.....    | 1  | 1 | s10 |
| .....cUcgggucggaguuagcucaagcgggu..... | 1  | 1 | s10 |
| .....cgcggGcggaguuagcucaagcgggu.....  | 1  | 1 | s10 |
| .....Accgggucggaguuagcucaagcgggu..... | 18 | 1 | s10 |
| .....ccgggucggaguuagcucaagcgu.....    | 1  | 1 | s10 |
| .....ccgggucggaguuagcucaagcgggu.....  | 20 | 0 | s10 |
| .....ccUgggucggaguuagcucaagcgggu..... | 1  | 1 | s10 |
| .....ccgggucggaguuagcucaagcgguu.....  | 1  | 0 | s10 |
| .....Accgggucggaguuagcucaagcgguu..... | 2  | 1 | s10 |
| .....ccgggucggaguuagcucaag.....       | 1  | 0 | s10 |
| .....ccgggucggaguuagcucaagc.....      | 2  | 0 | s10 |
| .....ccgggucggaguuagcucaagcgu.....    | 3  | 0 | s10 |
| .....ccgggucUgaguuagcucaagcgg.....    | 1  | 1 | s10 |
| .....ccgggGcggaguuagcucaagcgg.....    | 2  | 1 | s10 |
| .....ccgggucggaguuagcuCagcgg.....     | 2  | 1 | s10 |
| .....ccgggucggaguuagcuUaagcgg.....    | 1  | 1 | s10 |
| .....Ucgggucggaguuagcucaagcgg.....    | 7  | 1 | s10 |
| .....cUgggucggaguuagcucaagcgg.....    | 3  | 1 | s10 |
| .....ccgCgucggaguuagcucaagcgg.....    | 1  | 1 | s10 |
| .....ccgggucggaguuagcucaaUcgg.....    | 2  | 1 | s10 |
| .....cAgggucggaguuagcucaagcgg.....    | 1  | 1 | s10 |

cuaccgggucggaguuagcucaagcgguuaccucucugcggacuuucuaucuguccaucucugucgggguuucgagaccgcgggugcuuacugaccuuuuuag

|                                   |     |   |     |
|-----------------------------------|-----|---|-----|
| ...ccgggucggaguuagcucaCgcgg...    | 1   | 1 | s10 |
| ...ccgggucggaguuagcucaagcgg...    | 317 | 0 | s10 |
| ...ccgggucggaguuCgcucaagcgg...    | 1   | 1 | s10 |
| ...Gcgggucggaguuagcucaagcgg...    | 1   | 1 | s10 |
| ...ccgggucggCguuagcucaagcgg...    | 2   | 1 | s10 |
| ...Acgggucggaguuagcucaagcgg...    | 3   | 1 | s10 |
| ...ccgggucggaguuagcucaagUgg...    | 1   | 1 | s10 |
| ...ccgggucggaguuagUucaagcgg...    | 1   | 1 | s10 |
| ...Ucgggucggaguuagcucaagcgg...    | 13  | 1 | s10 |
| ...ccgggGcggaguuagcucaagcgg...    | 2   | 1 | s10 |
| ...ccUggucggaguuagcucaagcgg...    | 2   | 1 | s10 |
| ...ccgggCcgaguuagcucaagcgg...     | 2   | 1 | s10 |
| ...ccgggucggaguuagcuUaaagcgg...   | 2   | 1 | s10 |
| ...ccgggucggaguuCgcucaagcgg...    | 1   | 1 | s10 |
| ...ccgggucggCguuagcucaagcgg...    | 2   | 1 | s10 |
| ...cUgggucggaguuagcucaagcgg...    | 5   | 1 | s10 |
| ...ccgggUggaguuagcucaagcgg...     | 2   | 1 | s10 |
| ...ccgggucggAuuagcucaagcgg...     | 1   | 1 | s10 |
| ...ccgggucggaguuagcucaagcggG...   | 1   | 1 | s10 |
| ...ccgggucggaguuagcucaaCcggu...   | 1   | 1 | s10 |
| ...ccgggucggaguuagUucaagcgg...    | 1   | 1 | s10 |
| ...ccgggucggaguuagcucCagcgg...    | 2   | 1 | s10 |
| ...ccgggucggaguuagcGcaagcgg...    | 1   | 1 | s10 |
| ...cGgggucggaguuagcucaagcgg...    | 2   | 1 | s10 |
| ...ccgggucggaguuagcucaagcCgu...   | 1   | 1 | s10 |
| ...ccgggucggaguuagcucaagcgg...    | 614 | 0 | s10 |
| ...ccgggucggaguuagcucaagcggU...   | 3   | 1 | s10 |
| ...ccgggucggaguuagcucaCgcgg...    | 3   | 1 | s10 |
| ...ccgggucggaguuCagcucaagcgg...   | 1   | 1 | s10 |
| ...ccgggucggaguuagcucaagcggC...   | 2   | 1 | s10 |
| ...ccgggucggaguuagcucaaUcgg...    | 5   | 1 | s10 |
| ...ccgggucggaguuagcCcaagcgg...    | 1   | 1 | s10 |
| ...ccgggucAgaguuagcucaagcgg...    | 1   | 1 | s10 |
| ...ccgggucggaguuagcucaagcggA...   | 8   | 1 | s10 |
| ...ccgggGcggaguuagcucaagcgguu...  | 1   | 1 | s10 |
| ...ccgggucggaguuagcucaCgcgguu...  | 1   | 1 | s10 |
| ...ccgggucggaguuagcucaagcggC...   | 2   | 1 | s10 |
| ...ccgggucggaguuagcucaagcggG...   | 1   | 1 | s10 |
| ...ccgggucggaguuagcucaagcggCu...  | 1   | 1 | s10 |
| ...ccgggCcgaguuagcucaagcgguu...   | 1   | 1 | s10 |
| ...Ucgggucggaguuagcucaagcgguu...  | 2   | 1 | s10 |
| ...ccgggucggaguuagcucaagcggua...  | 33  | 1 | s10 |
| ...ccgggucggaguuagcucaagcgguu...  | 64  | 0 | s10 |
| ...cGgggucggaguuagcucaagcgguu...  | 2   | 1 | s10 |
| ...ccgggucggaguuagcucaagcggua...  | 8   | 1 | s10 |
| ...ccgggucggaguuagcucaagcgguuU... | 7   | 1 | s10 |
| ...ccgggucggaguuagcucaagcgguu...  | 5   | 0 | s10 |
| ...ccgggucggaguuagcuUa...         | 1   | 1 | s10 |
| ...cUggucggaguuagcucaag...        | 1   | 1 | s10 |
| ...cgggucggaguuagcuUaag...        | 1   | 1 | s10 |
| ...cgggucggaguuagcucaag...        | 21  | 0 | s10 |
| ...cgggucggaguuagcucaagG...       | 1   | 1 | s10 |
| ...cgggucggaguuagcucaagc...       | 28  | 0 | s10 |
| ...cgUgucggaguuagcucaagcg...      | 1   | 1 | s10 |
| ...cgggucggaguuagcucaagcg...      | 1   | 1 | s10 |
| ...cgggucggCguuagcucaagcg...      | 1   | 1 | s10 |
| ...cgggucggaguuagUucaagcg...      | 1   | 1 | s10 |
| ...cgggucggaguuagcucaagcg...      | 156 | 0 | s10 |
| ...cgggucggaguuagcucaCgcg...      | 1   | 1 | s10 |
| ...cgggucggaguuagcucaagcU...      | 2   | 1 | s10 |
| ...cgggGcggaguuagcucaagcg...      | 3   | 1 | s10 |
| ...cgggucggCguuagcucaagcgg...     | 17  | 1 | s10 |
| ...cgggucggaguuagcucCagcgg...     | 54  | 1 | s10 |
| ...cgggGcggaguuagcucaagcgg...     | 68  | 1 | s10 |
| ...cgggucggaguuagcucaagcUg...     | 25  | 1 | s10 |
| ...cgggucggaguuAAcucaagcgg...     | 2   | 1 | s10 |
| ...cgggucggaguuagcucaagUgg...     | 3   | 1 | s10 |
| ...cgggucggaguuagUucaagcgg...     | 13  | 1 | s10 |
| ...cgggucggaguuagcucaaCcgg...     | 3   | 1 | s10 |

cuaccgggucgggaguuagcucaagcgguuaccuccuacugcggacuuucuaucuguccaucucugucgggguuucgagaccgcgggugcuuacugaccuuuuuag

|                                       |      |   |     |
|---------------------------------------|------|---|-----|
| .....cgggucAgaguuagcucaagcgg.....     | 1    | 1 | s10 |
| .....Ugggucgggaguuagcucaagcgg.....    | 41   | 1 | s10 |
| .....cgggucgggUguuagcucaagcgg.....    | 4    | 1 | s10 |
| .....cgUgucgggaguuagcucaagcgg.....    | 5    | 1 | s10 |
| .....cgggucgggaguuUcucuaagcgg.....    | 17   | 1 | s10 |
| .....cgggucgggaguuCagcucaagcgg.....   | 9    | 1 | s10 |
| .....cgggucgggaguuGagcucaagcgg.....   | 4    | 1 | s10 |
| .....cgAgucgggaguuagcucaagcgg.....    | 2    | 1 | s10 |
| .....cgggucgggaguuagcucaagAgg.....    | 8    | 1 | s10 |
| .....cgggucgggaguuagcuLaagcgg.....    | 4    | 1 | s10 |
| .....cggguAaggaguuagcucaagcgg.....    | 5    | 1 | s10 |
| .....cgggucgggagGuaucuaagcgg.....     | 11   | 1 | s10 |
| .....cAggucgggaguuagcucaagcgg.....    | 5    | 1 | s10 |
| .....cgggucgggaguuagcAcaagcgg.....    | 1    | 1 | s10 |
| .....cgggucgggGguuagcucaagcgg.....    | 5    | 1 | s10 |
| .....cgggAcgggaguuagcucaagcgg.....    | 4    | 1 | s10 |
| .....Ggggucgggaguuagcucaagcgg.....    | 22   | 1 | s10 |
| .....cgggucgggAuuagcucaagcgg.....     | 1    | 1 | s10 |
| .....cgggucgggagCuagcucaagcgg.....    | 4    | 1 | s10 |
| .....cgggucgggaguuagcucaagcgg.....    | 7973 | 0 | s10 |
| .....cgggucgUaguuuagcucaagcgg.....    | 5    | 1 | s10 |
| .....cggAucgggaguuagcucaagcgg.....    | 1    | 1 | s10 |
| .....cgggucgggaguuagcCcaagcgg.....    | 8    | 1 | s10 |
| .....cgggucgggaguuagGuaagcgg.....     | 4    | 1 | s10 |
| .....cgggucgggaguuagcuUaagcgg.....    | 13   | 1 | s10 |
| .....Agggucgggaguuagcucaagcgg.....    | 15   | 1 | s10 |
| .....cgggucgggAuuagcucaagcgg.....     | 2    | 1 | s10 |
| .....cgggucgggaguuagcucaagcCG.....    | 1    | 1 | s10 |
| .....cgggucgggaguuagcucUagcgg.....    | 6    | 1 | s10 |
| .....cgggucgggaguuAuccuagcgg.....     | 2    | 1 | s10 |
| .....cgggucgggaguuagcGcaagcgg.....    | 3    | 1 | s10 |
| .....cgCgucgggaguuagcucaagcgg.....    | 2    | 1 | s10 |
| .....cgggucgggaguuagcucaagcgg.....    | 1    | 1 | s10 |
| .....cgggucgggaguuagcucGagcgg.....    | 8    | 1 | s10 |
| .....cgggucgggaguuagcucaaaAcgg.....   | 2    | 1 | s10 |
| .....cCggucgggaguuagcucaagcgg.....    | 3    | 1 | s10 |
| .....cgggucgggaguuagcuGaaagcgg.....   | 3    | 1 | s10 |
| .....cgggucgggAuuuagcucaagcgg.....    | 7    | 1 | s10 |
| .....cgggucgggaguuagcucaGgcgg.....    | 2    | 1 | s10 |
| .....cgggucgggaguuagcucaaUcgg.....    | 26   | 1 | s10 |
| .....cggUucgggaguuagcucaagcgg.....    | 5    | 1 | s10 |
| .....cgggucgggaguuagcucaagcggA.....   | 11   | 1 | s10 |
| .....cgggucgggaguuCgcuaagcgg.....     | 5    | 1 | s10 |
| .....cgggucgggaguuGgcuaagcgg.....     | 2    | 1 | s10 |
| .....cgggCcgaguuagcucaagcgg.....      | 8    | 1 | s10 |
| .....cgggucgggaguuagcucaCgcgg.....    | 31   | 1 | s10 |
| .....cggguUggaguuagcucaagcgg.....     | 13   | 1 | s10 |
| .....cUggucgggaguuagcucaagcgg.....    | 20   | 1 | s10 |
| .....cgggucgggaguuagAuaagcgg.....     | 13   | 1 | s10 |
| .....cgggucgggaguuagcucaagcGU.....    | 82   | 1 | s10 |
| .....cgggucgggaguuagcucaagcGC.....    | 6    | 1 | s10 |
| .....cgggucgggGguuagcucaagcgggu.....  | 19   | 1 | s10 |
| .....cgggucgggaguuAuccuagcgggu.....   | 13   | 1 | s10 |
| .....cgggucgggaguuagcucaagcGlu.....   | 9    | 1 | s10 |
| .....cCggucgggaguuagcucaagcgggu.....  | 12   | 1 | s10 |
| .....cgAgucgggaguuagcucaagcgggu.....  | 3    | 1 | s10 |
| .....cgggucgggaguuUgcuaagcgggu.....   | 3    | 1 | s10 |
| .....cggguUggaguuagcucaagcgggu.....   | 33   | 1 | s10 |
| .....cgggucgggaguuagcucaagcGU.....    | 48   | 1 | s10 |
| .....cgggucgggagluagcucaagcgggu.....  | 3    | 1 | s10 |
| .....Ugggucgggaguuagcucaagcgggu.....  | 140  | 1 | s10 |
| .....cgggucgggaguuagcGcaagcgggu.....  | 14   | 1 | s10 |
| .....cgggucgUaguuuagcucaagcgggu.....  | 5    | 1 | s10 |
| .....cgggucgggaguuagcucaaCcggu.....   | 10   | 1 | s10 |
| .....cgggucgggaguuagcucGagcgggu.....  | 16   | 1 | s10 |
| .....cgggucgggaguuAagcucaagcgggu..... | 2    | 1 | s10 |
| .....cgggucgggaguuGagcucaagcgggu..... | 12   | 1 | s10 |
| .....cgggucgggAuuuagcucaagcgggu.....  | 14   | 1 | s10 |
| .....cggCucgggaguuagcucaagcgggu.....  | 8    | 1 | s10 |

cuaccgggucgggaguuagcucaagcgguuaccuccuacugcggacuuucuaucuguccaucucugugcgggguuucgagaccgcgggugcuuacugaccuuuuuag

|                                       |       |   |     |
|---------------------------------------|-------|---|-----|
| .....cgggucgggaguuagcucaagAggu.....   | 41    | 1 | s10 |
| .....cgggucgggaguuagcucaagcAgu.....   | 4     | 1 | s10 |
| .....cgggucgggaguuCgcucaagcgggu.....  | 20    | 1 | s10 |
| .....cgggucgggaguuGgcucaagcgggu.....  | 6     | 1 | s10 |
| .....cgggucgggaguuCagcucaagcgggu..... | 21    | 1 | s10 |
| .....cgggucgggaguuagcucaagcgggu.....  | 26987 | 0 | s10 |
| .....cgggucgggaguuagcucaGgcgggu.....  | 4     | 1 | s10 |
| .....cgggucgggaguuagcuCagcgggu.....   | 179   | 1 | s10 |
| .....cgggucgggaguuagcucaagcgggu.....  | 51    | 1 | s10 |
| .....cgggucUgaguuagcucaagcgggu.....   | 10    | 1 | s10 |
| .....cUggucgggaguuagcucaagcgggu.....  | 70    | 1 | s10 |
| .....cgggucggGcuuagcucaagcgggu.....   | 66    | 1 | s10 |
| .....cgggucgggaguuagcuUaagcgggu.....  | 29    | 1 | s10 |
| .....cgggucgggaguuagcucaaaAcgggu..... | 8     | 1 | s10 |
| .....cgggucgggaguuagcuCcaagcgggu..... | 16    | 1 | s10 |
| .....cgggucgggaguuagcucaagcGU.....    | 100   | 1 | s10 |
| .....cgggucGggaguuagcucaagcgggu.....  | 6     | 1 | s10 |
| .....cgggucgggaguuagcucaCgcggu.....   | 126   | 1 | s10 |
| .....cgggucgggaguuagcuAcaagcgggu..... | 1     | 1 | s10 |
| .....cgggucgAaguuagcucaagcgggu.....   | 1     | 1 | s10 |
| .....cgggucgggaguuagcucaagcggA.....   | 440   | 1 | s10 |
| .....cgggucgggaCuagcucaagcgggu.....   | 5     | 1 | s10 |
| .....cgCgucgggaguuagcucaagcgggu.....  | 6     | 1 | s10 |
| .....cgggucgggaguuagcucaagcGcu.....   | 10    | 1 | s10 |
| .....cgggucgggaguuagcucaaUcggu.....   | 105   | 1 | s10 |
| .....cgggucgggaguuagcuGaaagcgggu..... | 20    | 1 | s10 |
| .....cgggAcgggaguuagcucaagcgggu.....  | 29    | 1 | s10 |
| .....cgggucgggaguuaglucaagcgggu.....  | 26    | 1 | s10 |
| .....cgggucgggaguuagcucaagcggG.....   | 81    | 1 | s10 |
| .....cgggCcgggaguuagcucaagcgggu.....  | 35    | 1 | s10 |
| .....cgggucAgaguuagcucaagcgggu.....   | 7     | 1 | s10 |
| .....cgggucgggaguuagcucaagcCgu.....   | 3     | 1 | s10 |
| .....cgUgucgggaguuagcucaagcgggu.....  | 35    | 1 | s10 |
| .....Ggggucgggaguuagcucaagcgggu.....  | 61    | 1 | s10 |
| .....cgggucgggaUuuagcucaagcgggu.....  | 30    | 1 | s10 |
| .....cggUucgggaguuagcucaagcgggu.....  | 9     | 1 | s10 |
| .....cgggucgggaguuagcuAaagcgggu.....  | 16    | 1 | s10 |
| .....cgggucgggaguuUcucaagcgggu.....   | 35    | 1 | s10 |
| .....cggguAaggaguuagcucaagcgggu.....  | 23    | 1 | s10 |
| .....cgggucgggaguuAcucaagcgggu.....   | 7     | 1 | s10 |
| .....cggAucgggaguuagcucaagcgggu.....  | 6     | 1 | s10 |
| .....cgggucgggaguuagcucaUgcgggu.....  | 7     | 1 | s10 |
| .....Agggucgggaguuagcucaagcgggu.....  | 28    | 1 | s10 |
| .....cgggucgggaguuagcucaagUggu.....   | 20    | 1 | s10 |
| .....cgggucgCaguuagcucaagcgggu.....   | 3     | 1 | s10 |
| .....cAggucgggaguuagcucaagcgggu.....  | 11    | 1 | s10 |
| .....cgggucgggaguuagcucaagcggC.....   | 71    | 1 | s10 |
| .....cgggucgggaguuagcucUagcgggu.....  | 2     | 1 | s10 |
| .....cgggucgggagCuagcucaagcgggu.....  | 8     | 1 | s10 |
| .....cgggucgggaguuagcucaagGggu.....   | 10    | 1 | s10 |
| .....cgggucgggaguuagGucaagcgggu.....  | 7     | 1 | s10 |
| .....cgggucgggaguuagUucaagcgggu.....  | 37    | 1 | s10 |
| .....cgggGcgggaguuagcucaagcgggu.....  | 231   | 1 | s10 |
| .....cgggucgggaguuagcuUaagcgggu.....  | 2     | 1 | s10 |
| .....cgggucgggaguuagcucaGgcgggu.....  | 1     | 1 | s10 |
| .....cgggucgggaguuagcucaagAgguu.....  | 3     | 1 | s10 |
| .....cgggucgggaguuagcucaagcGgu.....   | 2     | 1 | s10 |
| .....cgggGcgggaguuagcucaagcgggu.....  | 18    | 1 | s10 |
| .....cgggucgggaguuagcCcaagcgggu.....  | 1     | 1 | s10 |
| .....cgggCcgggaguuagcucaagcgggu.....  | 6     | 1 | s10 |
| .....cgggucAgaguuagcucaagcgggu.....   | 1     | 1 | s10 |
| .....cgggucgggaUuuagcucaagcgggu.....  | 1     | 1 | s10 |
| .....cgggucgggaguuagcucaagcGU.....    | 6     | 1 | s10 |
| .....cgggucgggaguuagcucaagcggua.....  | 1500  | 1 | s10 |
| .....Ggggucgggaguuagcucaagcgggu.....  | 15    | 1 | s10 |
| .....cggguAaggaguuagcucaagcgggu.....  | 1     | 1 | s10 |
| .....cgggucgggaguuagcuAaagcgggu.....  | 3     | 1 | s10 |
| .....cgggucgggaguuagcGcaagcgggu.....  | 2     | 1 | s10 |
| .....cgggAcgggaguuagcucaagcgggu.....  | 2     | 1 | s10 |



cuaccgggucgggaguuagcucaagcgguuuaccuccuacugcgggacuuucuaucuguccaucucugugcgggguuucgagaccgcgggugcuuacugaccuuuuuag

|                                         |      |   |     |
|-----------------------------------------|------|---|-----|
| .....cgggucggaUuuagcucaagcgguu.....     | 2    | 1 | s10 |
| .....cAggucgggaguuagcucaagcgguu.....    | 1    | 1 | s10 |
| .....cgggucgggaguuagcucaagcgguu.....    | 1    | 1 | s10 |
| .....cgggucgUaguuagcucaagcgguu.....     | 1    | 1 | s10 |
| .....cgggucgggaguuagcucaagcgguC.....    | 19   | 1 | s10 |
| .....cgggucgggaguuagcucCagcgguu.....    | 18   | 1 | s10 |
| .....cgggucgggaguuagcucaagcgguu.....    | 3    | 1 | s10 |
| .....cgggucgggaguuCgcucaagcgguu.....    | 3    | 1 | s10 |
| .....cgggucgggaguuagcucaagcgguu.....    | 2252 | 0 | s10 |
| .....cgggucgggagUGagcucaagcgguu.....    | 3    | 1 | s10 |
| .....cgggucgggagUCagcucaagcgguu.....    | 2    | 1 | s10 |
| .....cgggucgggaguuagcucaagcgguu.....    | 10   | 1 | s10 |
| .....cgggucgggCguuagcucaagcgguu.....    | 7    | 1 | s10 |
| .....cgggucCgaguuagcucaagcgguu.....     | 1    | 1 | s10 |
| .....cgUgucgggaguuagcucaagcgguu.....    | 5    | 1 | s10 |
| .....cgggucgggGuuuagcucaagcgguu.....    | 1    | 1 | s10 |
| .....cUggucgggaguuagcucaagcgguu.....    | 3    | 1 | s10 |
| .....cgggucgggaguuagcucaagcgguu.....    | 20   | 1 | s10 |
| .....cgggucgggaguuagcucaagcgguu.....    | 2    | 1 | s10 |
| .....Ugggucgggaguuagcucaagcgguu.....    | 8    | 1 | s10 |
| .....cgggucgggagCUagcucaagcgguu.....    | 1    | 1 | s10 |
| .....cgggucgggaguuAucucaagcgguu.....    | 1    | 1 | s10 |
| .....cgggucgggaguuagcucaagcgguu.....    | 9    | 1 | s10 |
| .....cgggucgCaguuagcucaagcgguu.....     | 1    | 1 | s10 |
| .....cgggucgggaguuagcucaagcgguuG.....   | 64   | 1 | s10 |
| .....cgggucgggaguuagcucaagcgguu.....    | 3    | 1 | s10 |
| .....cgggucgggaguuagcuGaaagcgguu.....   | 2    | 1 | s10 |
| .....cgggucgggaguuaglucaagcgguu.....    | 6    | 1 | s10 |
| .....cgggucgggaguuaguucaagcgguu.....    | 3    | 1 | s10 |
| .....cgggucgggaguuUcucaagcgguu.....     | 3    | 1 | s10 |
| .....cgggucgggaguuagcucaagcgguuC.....   | 10   | 1 | s10 |
| .....cgggucgggaguuagcucaagcgguu.....    | 3    | 1 | s10 |
| .....cgAgucgggaguuagcucaagcgguu.....    | 1    | 1 | s10 |
| .....cgggucgggaguuagcucaCgcgguu.....    | 16   | 1 | s10 |
| .....cgggucgggaguuagcucaaUcgguu.....    | 10   | 1 | s10 |
| .....cgggucgggaguuagcucaagcgguuAa.....  | 627  | 1 | s10 |
| .....cgggucgggaguuagcucaagcgguuA.....   | 111  | 0 | s10 |
| .....cgggucgggaguuagcucaagcgguuC.....   | 4    | 1 | s10 |
| .....cgggucgggaguuagcucaagcgguuG.....   | 3    | 1 | s10 |
| .....cgggucgggaguuagcucaagcgguuA.....   | 1    | 1 | s10 |
| .....cgggucgggaguuagcucaagcgguuA.....   | 2    | 1 | s10 |
| .....AgggucgggaguuagcucaagcgguuA.....   | 1    | 1 | s10 |
| .....cgggucgggaguuagcucaagcgguuCa.....  | 12   | 1 | s10 |
| .....cgggucgggaguuagcucaagcgguuCa.....  | 17   | 1 | s10 |
| .....cgggucgggaguuagcucaagcgguuU.....   | 338  | 1 | s10 |
| .....cgggucgggaguuagcucaagcgguuAac..... | 3    | 1 | s10 |
| .....cgggucgggaguuagcucaagcgguuA.....   | 4    | 1 | s10 |
| .....cgggucgggaguuagcucaagcgguuA.....   | 3    | 1 | s10 |
| .....cgggucgggaguuagcucaagcgguuac.....  | 2    | 0 | s10 |
| .....gggucgggaguuagcucaa.....           | 1    | 0 | s10 |
| .....gggucgggaguuagcucaag.....          | 2    | 0 | s10 |
| .....gggucgggaguuagcucaagc.....         | 7    | 0 | s10 |
| .....gggucgggaguuagcucaagc.....         | 2    | 0 | s10 |
| .....gggucgggCguuagcucaagcgg.....       | 1    | 1 | s10 |
| .....gggucgggaguuagcucaagcggU.....      | 6    | 1 | s10 |
| .....gggucgggaguuagcucaagcgg.....       | 3    | 1 | s10 |
| .....gggucgggaguuagcucaaUcgg.....       | 2    | 1 | s10 |
| .....gggCcgaguuagcucaagcgg.....         | 1    | 1 | s10 |
| .....gggucgggaguuagcucaagcgg.....       | 1    | 1 | s10 |
| .....gggucgggaguuagcucGagcgg.....       | 1    | 1 | s10 |
| .....gggucgggaguuagcucaCgcgg.....       | 3    | 1 | s10 |
| .....ggUcgggaguuagcucaagcgg.....        | 1    | 1 | s10 |
| .....gggucgggaguuagcucaagcgg.....       | 1    | 1 | s10 |
| .....gggucgggaguuagcucaagcgg.....       | 186  | 0 | s10 |
| .....gggucgggaguuagcucaagcggU.....      | 2    | 1 | s10 |
| .....gggucgggaguuagcucCagcgg.....       | 2    | 1 | s10 |
| .....gggucgggaguuagcucaagcggC.....      | 1    | 1 | s10 |
| .....Cggucgggaguuagcucaagcgg.....       | 9    | 1 | s10 |

cuaccgggucggaguuaagcucaagcgguuaccuccuacugcggacuucuaucuguccaucucugucgggguuacgagaccgcgggugcuuacugaccuuuuuug

|                                         |     |   |     |
|-----------------------------------------|-----|---|-----|
| .....gggucgUaguuaagcucaagcgggu.....     | 1   | 1 | s10 |
| .....gggucAgaguuaagcucaagcgggu.....     | 1   | 1 | s10 |
| .....gggucggaguuaaCcucaagcgggu.....     | 1   | 1 | s10 |
| .....gggucggaguuaagcCcaagcgggu.....     | 1   | 1 | s10 |
| .....ggCucggaguuaagcucaagcgggu.....     | 1   | 1 | s10 |
| .....gggucggGguuaagcucaagcgggu.....     | 3   | 1 | s10 |
| .....gggucggaguuaagcucGagcgggu.....     | 2   | 1 | s10 |
| .....Aggucggaguuaagcucaagcgggu.....     | 1   | 1 | s10 |
| .....gggucggaguuaagcCagcucaagcgggu..... | 3   | 1 | s10 |
| .....gggucggaguuaagAuucaagcgggu.....    | 1   | 1 | s10 |
| .....ggguAaggaguuaagcucaagcgggu.....    | 5   | 1 | s10 |
| .....gggucggaguuaagcucCagcgggu.....     | 8   | 1 | s10 |
| .....gggucggAuuagcucaagcgggu.....       | 1   | 1 | s10 |
| .....gggucggaguuaagcucaagcggU.....      | 3   | 1 | s10 |
| .....gggucggaguuaagcuLaagcgggu.....     | 3   | 1 | s10 |
| .....Uggucggaguuaagcucaagcgggu.....     | 4   | 1 | s10 |
| .....gggucggaguuaagcGcaagcgggu.....     | 1   | 1 | s10 |
| .....gggucggaguuaaAcucaagcgggu.....     | 1   | 1 | s10 |
| .....Cggucggaguuaagcucaagcgggu.....     | 32  | 1 | s10 |
| .....gggucggaguuaagcucaCgcgggu.....     | 11  | 1 | s10 |
| .....gggucggaguuaagcucaagcggG.....      | 6   | 1 | s10 |
| .....gggucgAaguuaagcucaagcgggu.....     | 1   | 1 | s10 |
| .....gggucggaguuaagcucaagcggC.....      | 8   | 1 | s10 |
| .....gggucggaguuaagcucaagAaggu.....     | 2   | 1 | s10 |
| .....gggucggaguuaagcucaagcUgu.....      | 4   | 1 | s10 |
| .....gggucggaguuaagcucaaUcgggu.....     | 3   | 1 | s10 |
| .....gggucggaguuaagcucaagcgggu.....     | 919 | 0 | s10 |
| .....gggucggaguuaagcucaagcggA.....      | 5   | 1 | s10 |
| .....gggucggaguuaagcucaagcAgu.....      | 1   | 1 | s10 |
| .....gggucggUguuaagcucaagcgggu.....     | 1   | 1 | s10 |
| .....gggucggaguuaagcGagcucaagcgggu..... | 1   | 1 | s10 |
| .....ggguUggaguuaagcucaagcgggu.....     | 1   | 1 | s10 |
| .....gggGcggaguuaagcucaagcgggu.....     | 6   | 1 | s10 |
| .....gggucggagGuagcucaagcgggu.....      | 4   | 1 | s10 |
| .....gggCcggaguuaagcucaagcgggu.....     | 1   | 1 | s10 |
| .....Aggucggaguuaagcucaagcgguu.....     | 1   | 1 | s10 |
| .....gggucggaguuaaCcucaagcgguu.....     | 2   | 1 | s10 |
| .....gggucggCguuaagcucaagcgguu.....     | 2   | 1 | s10 |
| .....gggucggaguuaagGucaagcgguu.....     | 1   | 1 | s10 |
| .....gggGcggaguuaagcucaagcgguu.....     | 7   | 1 | s10 |
| .....ggguUggaguuaagcucaagcgguu.....     | 2   | 1 | s10 |
| .....gggucggaguuaagcucaagcggAuu.....    | 1   | 1 | s10 |
| .....gggucggaguuaagcucaagcggguG.....    | 5   | 1 | s10 |
| .....gggucggaguuaagcucaCgcgguu.....     | 6   | 1 | s10 |
| .....gggucggaguuaagcGcucaagcgguu.....   | 1   | 1 | s10 |
| .....gggucggaguuaagcucaaUcgguu.....     | 3   | 1 | s10 |
| .....gggucggaguuaagcucaagcggGu.....     | 6   | 1 | s10 |
| .....gggucggaguuaagcucCagcgguu.....     | 1   | 1 | s10 |
| .....gggucggaguuaagcucaagcgguu.....     | 423 | 0 | s10 |
| .....Cggucggaguuaagcucaagcgguu.....     | 2   | 1 | s10 |
| .....gggucggaguuaagcucaagcggCu.....     | 1   | 1 | s10 |
| .....ggAucggaguuaagcucaagcgguu.....     | 1   | 1 | s10 |
| .....gggucggaguuaagcucaagcgguuA.....    | 78  | 1 | s10 |
| .....gggucggaguuaagcuLaagcgguu.....     | 2   | 1 | s10 |
| .....gggucggaguuaagcCcaagcgguu.....     | 2   | 1 | s10 |
| .....gggucggAuuagcucaagcgguu.....       | 1   | 1 | s10 |
| .....gggucggagGuagcucaagcgguu.....      | 2   | 1 | s10 |
| .....Uggucggaguuaagcucaagcgguu.....     | 1   | 1 | s10 |
| .....gggucggaguuaagcucaagcUgu.....      | 4   | 1 | s10 |
| .....gggucggaguuaagcCagcucaagcgguu..... | 1   | 1 | s10 |
| .....gggucggaguuaagcucaagcgguuAa.....   | 17  | 1 | s10 |
| .....gggucggaguuaagcucaagcgguuua.....   | 44  | 0 | s10 |
| .....gggucggaguuaagcucaagcgguuU.....    | 69  | 1 | s10 |
| .....gggucggaguuaagcucaagcgguuac.....   | 14  | 0 | s10 |
| .....gggucggaguuaagcucaagcgguuacc.....  | 3   | 0 | s10 |
| .....gggucggaguuaagcucaagcgguuaccu..... | 1   | 0 | s10 |
| .....Cgucggaguuaagcucaagcgg.....        | 1   | 1 | s10 |
| .....Cgucggaguuaagcucaagcgggu.....      | 1   | 1 | s10 |
| .....ggucggaguuaagcucaagcgggu.....      | 1   | 0 | s10 |

cuaccg<sup>g</sup>guc<sup>g</sup>g<sup>g</sup>u<sup>g</sup>ag<sup>g</sup>cu<sup>g</sup>ca<sup>g</sup>cg<sup>g</sup>u<sup>g</sup>u<sup>g</sup>acc<sup>g</sup>uc<sup>g</sup>ca<sup>g</sup>uc<sup>g</sup>cg<sup>g</sup>ac<sup>g</sup>uu<sup>g</sup>cu<sup>g</sup>au<sup>g</sup>cug<sup>g</sup>uca<sup>g</sup>uc<sup>g</sup>ug<sup>g</sup>uc<sup>g</sup>g<sup>g</sup>g<sup>g</sup>u<sup>g</sup>cg<sup>g</sup>ag<sup>g</sup>acc<sup>g</sup>cg<sup>g</sup>cg<sup>g</sup>g<sup>g</sup>uc<sup>g</sup>u<sup>g</sup>ac<sup>g</sup>ug<sup>g</sup>acc<sup>g</sup>uu<sup>g</sup>ua<sup>g</sup>ug

|                                     |     |   |     |
|-------------------------------------|-----|---|-----|
| .....ucggaguuagcucaagcggg.....      | 5   | 0 | s10 |
| .....cggaguuagcucaagcgg.....        | 2   | 0 | s10 |
| .....ggaguuagcucaagcggg.....        | 5   | 0 | s10 |
| .....ggaguuagcucaagcgguu.....       | 1   | 0 | s10 |
| .....uaccuccucaugccggacu.....       | 2   | 0 | s10 |
| .....uaccuccucaugccggacuuu.....     | 7   | 0 | s10 |
| .....uaccuccucaugccggacuuuc.....    | 3   | 0 | s10 |
| .....uaUcuccucaugccggacuuucu.....   | 2   | 1 | s10 |
| .....uaccuccucaugccggCcuuuuc.....   | 1   | 1 | s10 |
| .....uaccuccucaugccggacuuuc.....    | 8   | 0 | s10 |
| .....uccucaugccggacuuuc.....        | 1   | 0 | s10 |
| .....ccucaugccggacuuuc.....         | 1   | 0 | s10 |
| .....ucaugccggacuuucuu.....         | 2   | 0 | s10 |
| .....ucugugcugggguucgag.....        | 1   | 0 | s10 |
| .....cugugcugggguucgagac.....       | 1   | 0 | s10 |
| .....ugugcugggguucgagac.....        | 1   | 0 | s10 |
| .....ugugcugggguucgagaccgc.....     | 1   | 0 | s10 |
| .....guucgagaccgcgggCgc.....        | 1   | 1 | s10 |
| .....agaccgcgggugcuuacuCaaccuu..... | 1   | 1 | s10 |
| .....cgcgggugcuuacugacc.....        | 1   | 0 | s10 |
| .....cgcgggugcuuacugacc.....        | 3   | 0 | s10 |
| .....cgcgggugcuuacugaUccu.....      | 1   | 1 | s10 |
| .....Ugcgggugcuuacugaccu.....       | 1   | 1 | s10 |
| .....cgcgggugcuuacugaccu.....       | 24  | 0 | s10 |
| .....cgcgggugcuuacuUaccu.....       | 1   | 1 | s10 |
| .....cgcgggugUuuacugaccuu.....      | 6   | 1 | s10 |
| .....cgcgggugcuCacugaccuu.....      | 3   | 1 | s10 |
| .....cAcgggugcuuacugaccuu.....      | 1   | 1 | s10 |
| .....cgcgggugcuuacugCccuu.....      | 2   | 1 | s10 |
| .....cgcgggugcuuacGgaccuu.....      | 1   | 1 | s10 |
| .....cgcgggugcuuauUgaccuu.....      | 3   | 1 | s10 |
| .....Ugcgggugcuuacugaccuu.....      | 1   | 1 | s10 |
| .....cgcgggugcuuacuCaaccuu.....     | 1   | 1 | s10 |
| .....cgcgggugcuuacugaccuA.....      | 8   | 1 | s10 |
| .....cgcgggugcuuacugaccuu.....      | 375 | 0 | s10 |
| .....cgcgggugcuuacugaccUuu.....     | 1   | 1 | s10 |
| .....cgcgggGgcuuacugaccuu.....      | 3   | 1 | s10 |
| .....cgcgggugcuuacuUaccuu.....      | 2   | 1 | s10 |
| .....cgcgggugcuuacugaUccuu.....     | 4   | 1 | s10 |
| .....cgcgggugcuuacugaccuC.....      | 2   | 1 | s10 |
| .....cgcgggugcuuauUgaccuuu.....     | 1   | 1 | s10 |
| .....cgcgggugcuuacugaccUuuu.....    | 1   | 1 | s10 |
| .....cgcgggugcuuacugaccuuA.....     | 5   | 1 | s10 |
| .....cgcgggugcuuacugaccuuA.....     | 1   | 1 | s10 |
| .....cgcgggugcuuacugaccuuA.....     | 5   | 1 | s10 |
| .....cgcgggugcuuacugaccCuu.....     | 1   | 1 | s10 |
| .....cgcgggugcuuacugaccuuG.....     | 1   | 1 | s10 |
| .....cgcgggugcuuacugaccuuu.....     | 265 | 0 | s10 |
| .....cgcgggugcuuacugaccuuC.....     | 1   | 1 | s10 |
| .....cgcgggugcuuacugaccuuu.....     | 1   | 1 | s10 |
| .....cgcgggugcuuacugaGccuu.....     | 1   | 1 | s10 |
| .....cgcgggugcuuacugacUccuu.....    | 1   | 1 | s10 |
| .....cgcgggugcuuacugaUccuu.....     | 2   | 1 | s10 |
| .....cgcgggugcuuacCgaccuuu.....     | 2   | 1 | s10 |
| .....cgcgggugUuuacugaccuuu.....     | 3   | 1 | s10 |
| .....cgcgggugcuuacugaccuuuu.....    | 12  | 0 | s10 |
| .....cgcgggugcuuacugaccuuuA.....    | 3   | 1 | s10 |
| .....cgcgggugcuuacugaccuuuA.....    | 11  | 1 | s10 |
| .....cgcgggugcuuauUgaccuuu.....     | 1   | 1 | s10 |
| .....cgcgggugcuuacugaccuuuA.....    | 1   | 1 | s10 |
| .....gcgggugcuuacugaccuu.....       | 1   | 0 | s10 |
| .....gcgggugcuuacugaccuuu.....      | 3   | 0 | s10 |
| .....cgggugcuuacugaccuuu.....       | 1   | 0 | s10 |
| .....gggugcuuacugaccuu.....         | 1   | 0 | s10 |
| .....cgggucggaguuagcuca.....        | 1   | 0 | ta3 |
| .....cgggucggaguuagcucaaA.....      | 1   | 1 | ta3 |

cuaccgggucggaguuagcucaagcgguuaccuccucaugcgggacuuucuaucuguccaucucugucgggguuucgagaccgcggggucuuacugaccuuuuuug

|                                      |     |   |     |
|--------------------------------------|-----|---|-----|
| .....cgggucggaguuagcucaagc.....      | 1   | 0 | ta3 |
| .....cgggucggaguuagcucaagcg.....     | 3   | 0 | ta3 |
| .....cgggCcgaguuagcucaagcgg.....     | 1   | 1 | ta3 |
| .....cgggucggaguuagcucaagcggU.....   | 1   | 1 | ta3 |
| .....cgggucggaguuagcucaagcggA.....   | 5   | 1 | ta3 |
| .....cgggucggaguuagcucaaUcgg.....    | 1   | 1 | ta3 |
| .....cgggucggaguuagcucaagcgg.....    | 46  | 0 | ta3 |
| .....cgggucggaguuagcucCagcgg.....    | 1   | 1 | ta3 |
| .....cgggucggaguuagcucaagcggA.....   | 3   | 1 | ta3 |
| .....cgggucggaguuagcucaCgcgg.....    | 1   | 1 | ta3 |
| .....cgggucggaguuagcucaagcUgu.....   | 1   | 1 | ta3 |
| .....cgggucggaguuagcucaagcgg.....    | 25  | 0 | ta3 |
| .....cgggucAgaguuagcucaagcgguu.....  | 1   | 1 | ta3 |
| .....cgggucggaguuagcucaagcgguu.....  | 4   | 0 | ta3 |
| .....gggucggaguuagcucaagcgg.....     | 5   | 0 | ta3 |
| .....caagcgguuaccuccucCug.....       | 1   | 1 | ta3 |
| .....uaccuccucaugcggacuu.....        | 1   | 0 | ta3 |
| .....uaccuccucaugcggacuuuc.....      | 1   | 0 | ta3 |
| .....cugugcugggguucgagacc.....       | 1   | 0 | ta3 |
| .....cugggguucgagaccgcgggucuu.....   | 1   | 0 | ta3 |
| .....gagaccgcgggucuuac.....          | 2   | 0 | ta3 |
| .....cgcgggucuuacugaccuu.....        | 6   | 0 | ta3 |
| .....cgcgggucuuacugaccA.....         | 1   | 1 | ta3 |
| .....cgUgggucuuacugaccuu.....        | 1   | 1 | ta3 |
| .....cgcgggucuuacugaAaccuu.....      | 2   | 1 | ta3 |
| .....cgcgggucuuacugaccAuu.....       | 1   | 1 | ta3 |
| .....cgcgggucuuacugaccuu.....        | 154 | 0 | ta3 |
| .....cgcgggucuuacugaccuG.....        | 1   | 1 | ta3 |
| .....cgcgggucuuacugaccG.....         | 1   | 1 | ta3 |
| .....cgcgggucuuacugaccuA.....        | 7   | 1 | ta3 |
| .....cgcgggUcuuacugaccuu.....        | 1   | 1 | ta3 |
| .....cgcgggucuuacuUaccuu.....        | 3   | 1 | ta3 |
| .....cgAgggucuuacugaccuu.....        | 1   | 1 | ta3 |
| .....cgcgggucuuacugaccuuA.....       | 2   | 1 | ta3 |
| .....cAgggucuuacugaccuu.....         | 1   | 1 | ta3 |
| .....cgcgggucuuacugaccuu.....        | 47  | 0 | ta3 |
| .....cgCgggucuuacugaccuu.....        | 1   | 1 | ta3 |
| .....cgcgggucuuacugaUccuu.....       | 1   | 1 | ta3 |
| .....cgcggggGuuacugaccuu.....        | 1   | 1 | ta3 |
| .....cgcgggucuuacugaccuuC.....       | 1   | 1 | ta3 |
| .....cgcgggucuuacugaccuuA.....       | 8   | 1 | ta3 |
| .....cgcgggucuuacugaccuuuC.....      | 1   | 1 | ta3 |
| .....cgcgggucuuacugaccuuuu.....      | 5   | 0 | ta3 |
| .....cgcgggucuuacugaccuuuA.....      | 2   | 1 | ta3 |
| .....cgggucuuacugaccuu.....          | 1   | 0 | ta3 |
| .....cgggucuuacugaccuu.....          | 1   | 0 | ta3 |
| .....ccgggucggaguuagcucaagU.....     | 6   | 1 | j06 |
| .....ccgggCcgaguuagcucaagcgg.....    | 1   | 1 | j06 |
| .....ccgggucggaguuagcucaagcgg.....   | 8   | 0 | j06 |
| .....ccgggucggaguuagcucaagcgg.....   | 18  | 0 | j06 |
| .....ccgggucggaguuagcucaagcggC.....  | 1   | 1 | j06 |
| .....ccgggucggaguuagcucaagcggA.....  | 1   | 1 | j06 |
| .....ccgggucggaguuagcucaagcgguu..... | 3   | 0 | j06 |
| .....cgggucggagGuaagcucaag.....      | 1   | 1 | j06 |
| .....cgggucggaguuagcucaag.....       | 4   | 0 | j06 |
| .....Ugggucggaguuagcucaagc.....      | 5   | 1 | j06 |
| .....cgggucggagGuaagcucaagcg.....    | 1   | 1 | j06 |
| .....cgggCcgaguuagcucaagcgg.....     | 1   | 1 | j06 |
| .....cgggucggaguuagcucaagcgg.....    | 49  | 0 | j06 |
| .....cgggucggAuuagcucaagcgg.....     | 1   | 1 | j06 |
| .....cgggAcggaguuagcucaagcgg.....    | 1   | 1 | j06 |
| .....cgggucggaguuagcucaagcggU.....   | 1   | 1 | j06 |
| .....cgggucggCguuagcucaagcgg.....    | 1   | 1 | j06 |
| .....cgggucggaguuagcucaaAcgg.....    | 1   | 1 | j06 |
| .....cgggucggaguuUcucaagcgg.....     | 1   | 1 | j06 |
| .....cgggucggaguuagcCcaagcgg.....    | 1   | 1 | j06 |
| .....cgggucggagUcagcucaagcgg.....    | 1   | 1 | j06 |
| .....cgggucggaguuagLucaagcgg.....    | 1   | 1 | j06 |

cuaccgggucgggaguuagcucaagcgguuaccuccuacugcggacuucuaucuguccaucucugugcgggguuucgagaccgcgggugcuuacugaccuuuuuag

|                                       |     |   |     |
|---------------------------------------|-----|---|-----|
| .....cgggucgggaguuagcucaCgcgg.....    | 2   | 1 | j06 |
| .....cgggucgggaguuagcucaGgcgg.....    | 1   | 1 | j06 |
| .....cgggGcggaguuagcucaagcgg.....     | 6   | 1 | j06 |
| .....cgggucgggaguuagcucaagcgg.....    | 661 | 0 | j06 |
| .....cgggucgggaguuagcucaaCcg.....     | 1   | 1 | j06 |
| .....cgggucgggaguuagcucUagcgg.....    | 1   | 1 | j06 |
| .....cgggucgggaguuagcucaaUcgg.....    | 2   | 1 | j06 |
| .....cgggCcgaguuagcucaagcgg.....      | 2   | 1 | j06 |
| .....cggguUggaguuagcucaagcgg.....     | 2   | 1 | j06 |
| .....cgggucgggaguuagcucGagcgg.....    | 1   | 1 | j06 |
| .....Ugggucgggaguuagcucaagcgg.....    | 5   | 1 | j06 |
| .....cgggucgggaguuagcucaCgcgg.....    | 4   | 1 | j06 |
| .....cgggucgggaguuagcucUagcgg.....    | 1   | 1 | j06 |
| .....cgggucgggaguuGgcuaagcgg.....     | 2   | 1 | j06 |
| .....cgggucAgaguuagcucaagcgg.....     | 1   | 1 | j06 |
| .....cgggucgggaguuagcucaaUcgg.....    | 1   | 1 | j06 |
| .....cgggucgggaguuagcucaagUg.....     | 2   | 1 | j06 |
| .....cgggucgggaguuagcuAaagcgg.....    | 2   | 1 | j06 |
| .....cgggucggGguuagcucaagcgg.....     | 1   | 1 | j06 |
| .....cgggucgggaguuagcucaagcgg.....    | 1   | 1 | j06 |
| .....cgggucggGguuagcucaagcgg.....     | 1   | 1 | j06 |
| .....cgggucgggaguuagcucaagcgg.....    | 4   | 1 | j06 |
| .....cgggucgggaguuagcucaagcggC.....   | 9   | 1 | j06 |
| .....cgggucgggAguuagcucaagcgg.....    | 1   | 1 | j06 |
| .....cUggucgggaguuagcucaagcgg.....    | 1   | 1 | j06 |
| .....cgggucgggaguuUcuaagcgg.....      | 5   | 1 | j06 |
| .....cgggGcggaguuagcucaagcgg.....     | 5   | 1 | j06 |
| .....cgggucgggaguuAucuaagcgg.....     | 1   | 1 | j06 |
| .....cgggucgggaguuCagcucaagcgg.....   | 5   | 1 | j06 |
| .....cgggucgggaguuagcucaGgcgg.....    | 2   | 1 | j06 |
| .....cgggucAggaguuagcucaagcgg.....    | 1   | 1 | j06 |
| .....cgggAcggaguuagcucaagcgg.....     | 2   | 1 | j06 |
| .....cgggucgggaguuagcucaagcgg.....    | 875 | 0 | j06 |
| .....cgggCcgaguuagcucaagcgg.....      | 2   | 1 | j06 |
| .....cgggucgggaguuagcucaagcggA.....   | 51  | 1 | j06 |
| .....Ggggucgggaguuagcucaagcgg.....    | 2   | 1 | j06 |
| .....cgggucgggaguuagcucaagcgguu.....  | 168 | 0 | j06 |
| .....cgggucgggaguuagcucaagcggA.....   | 132 | 1 | j06 |
| .....Ugggucgggaguuagcucaagcgguu.....  | 2   | 1 | j06 |
| .....cgggucggGguuagcucaagcgguu.....   | 1   | 1 | j06 |
| .....cgggGcggaguuagcucaagcgguu.....   | 1   | 1 | j06 |
| .....cgggCcgaguuagcucaagcgguu.....    | 1   | 1 | j06 |
| .....cgggucgggaguuagcucaCgcgguu.....  | 1   | 1 | j06 |
| .....cgggucgggaguuagcucaagcUg.....    | 1   | 1 | j06 |
| .....cgggucgggaguuagcucaagcggCu.....  | 2   | 1 | j06 |
| .....cgggucgggaguuagcucaUgcgguu.....  | 1   | 1 | j06 |
| .....cgggucgggaguuagcucaagcgguuU..... | 83  | 1 | j06 |
| .....cgggucgggaguuagcucaagcgguuA..... | 27  | 0 | j06 |
| .....cgggucgggaguuagcucaagcggCa.....  | 1   | 1 | j06 |
| .....cgggucgggaguuagcucaagcgguuC..... | 1   | 1 | j06 |
| .....cgggucgggaguuagcucaagcggA.....   | 58  | 1 | j06 |
| .....cgggucgggaguuagcucaagcgguuA..... | 8   | 1 | j06 |
| .....gggucggGguuagcucaagcgg.....      | 1   | 1 | j06 |
| .....gggucUgaguuagcucaagcgg.....      | 1   | 1 | j06 |
| .....ggguUggaguuagcucaagcgg.....      | 1   | 1 | j06 |
| .....gggGcggaguuagcucaagcgg.....      | 1   | 1 | j06 |
| .....gggucgggaguuagcucUagcgg.....     | 1   | 1 | j06 |
| .....gggucgggaguuagcucaagcgg.....     | 66  | 0 | j06 |
| .....gggucggGguuagcucaagcgg.....      | 1   | 1 | j06 |
| .....gggAcggaguuagcucaagcgg.....      | 1   | 1 | j06 |
| .....gggucgggaguuagcucaagcggA.....    | 1   | 1 | j06 |
| .....gggGcggaguuagcucaagcgg.....      | 4   | 1 | j06 |
| .....gggCcgaguuagcucaagcgg.....       | 2   | 1 | j06 |
| .....gggucgggaguuagcucaagcgg.....     | 1   | 1 | j06 |
| .....gggucgggaguuagcucaagcgg.....     | 283 | 0 | j06 |
| .....gggucgggaguuagcucaagcggG.....    | 3   | 1 | j06 |
| .....gggucgggaguuCgcuaagcgg.....      | 1   | 1 | j06 |
| .....gggucgggaguuagcucaagcggC.....    | 2   | 1 | j06 |
| .....gggucgggaguuagcucCagcgg.....     | 1   | 1 | j06 |

cuaccgggucggaguuagcucaagcgguuaccuccuacugcggacuuucuaucuguccaucucugucgggguuucgagaccgcgggugcuuacugaccuuuuuug

|                                        |     |   |     |
|----------------------------------------|-----|---|-----|
| .....gggucggaguuagcuUaagcgggu.....     | 1   | 1 | j06 |
| .....gggucggaguuagcucaagcggCu.....     | 1   | 1 | j06 |
| .....gggucggaguuagcGcaagcgggu.....     | 1   | 1 | j06 |
| .....gCgucggaguuagcucaagcgggu.....     | 1   | 1 | j06 |
| .....gggucggaguuGgcucaagcgggu.....     | 3   | 1 | j06 |
| .....gggucggaguuagcucaagUgggu.....     | 9   | 1 | j06 |
| .....gggucggaguuagcucaagcggA.....      | 31  | 1 | j06 |
| .....gggucggaguuagcucaagcggCu.....     | 2   | 1 | j06 |
| .....gggucggaguuagcucaagcggguA.....    | 93  | 1 | j06 |
| .....gggucggaguuagcucaagcggGu.....     | 1   | 1 | j06 |
| .....gggucggaguuagcucaagcggguu.....    | 31  | 0 | j06 |
| .....gggucggaguuagcucaagUggguu.....    | 1   | 1 | j06 |
| .....gggCcgaguuagcucaagcggguu.....     | 2   | 1 | j06 |
| .....gggucggaguuagcucaagcggguAa.....   | 3   | 1 | j06 |
| .....gggucggaguuagcucaagcggguU.....    | 68  | 1 | j06 |
| .....gggucggaguuagcucaagcggguua.....   | 9   | 0 | j06 |
| .....gucggaguuagcucaagcggg.....        | 2   | 0 | j06 |
| .....gucgugggguucgagaccgcgggu.....     | 2   | 0 | j06 |
| .....cgcgggugcuuaUugaccuu.....         | 9   | 1 | j06 |
| .....cgcgggAgcuuacugaccuu.....         | 1   | 1 | j06 |
| .....cgcgggugcuuacugaccuA.....         | 2   | 1 | j06 |
| .....cgcgggugcuuacugCccuu.....         | 2   | 1 | j06 |
| .....cgUgggugcuuacugaccuu.....         | 5   | 1 | j06 |
| .....cgcgggugcuuacugacUcuu.....        | 1   | 1 | j06 |
| .....cgcgggugcuuacugaccuu.....         | 94  | 0 | j06 |
| .....cgcgggGgcuuacugaccuu.....         | 1   | 1 | j06 |
| .....cgcgggugcuuacugaccuuu.....        | 9   | 0 | j06 |
| .....cgcgggugcuuacugCccuuu.....        | 1   | 1 | j06 |
| .....cgcgggAgcuuacugaccuuu.....        | 1   | 1 | j06 |
| .....cgcgggugcuuacugaccuuuA.....       | 5   | 1 | j06 |
| .....accgggucggaguuagcucaagcgggu.....  | 2   | 0 | j10 |
| .....accgggucggaguuagcucaagcggguu..... | 2   | 0 | j10 |
| .....accgggucggaguuagcucaagcggguU..... | 2   | 1 | j10 |
| .....cccgggucggaguuagcucaagcgggu.....  | 2   | 0 | j10 |
| .....cgggucggaguuagcucaagc.....        | 2   | 0 | j10 |
| .....cgggucggaguuagcucaagcgg.....      | 2   | 0 | j10 |
| .....cgggucAgaguuagcucaagcgg.....      | 1   | 1 | j10 |
| .....Acgggucggaguuagcucaagcgg.....     | 1   | 1 | j10 |
| .....Ucgggucggaguuagcucaagcgg.....     | 1   | 1 | j10 |
| .....cgggucggaguuagcucaagcgg.....      | 25  | 0 | j10 |
| .....cgggucggaguuagcucaagcgggu.....    | 10  | 0 | j10 |
| .....cgggucggaguuagcucCagcgggu.....    | 1   | 1 | j10 |
| .....cgggucggaguuagcucaGgCgggu.....    | 1   | 1 | j10 |
| .....cgggucggaguuagcucaagcggguu.....   | 3   | 0 | j10 |
| .....cgggucggaguuagcucaagcggguua.....  | 1   | 0 | j10 |
| .....cgggucggaguuagcucaagcggguAa.....  | 1   | 1 | j10 |
| .....cgggucggaguuagcucaagcggguU.....   | 1   | 1 | j10 |
| .....cgggucggaguuagcucaag.....         | 1   | 0 | j10 |
| .....cgggucggaguuagcucaagc.....        | 4   | 0 | j10 |
| .....cgggucggaguuagcucaagcgg.....      | 12  | 0 | j10 |
| .....cgggGcggaguuagcucaagcgg.....      | 2   | 1 | j10 |
| .....cgggucggaguuUcucaagcgg.....       | 2   | 1 | j10 |
| .....cgggucggaguuagcucCagcgg.....      | 2   | 1 | j10 |
| .....cgggucggaguuagcucaagcggU.....     | 2   | 1 | j10 |
| .....cgggucggaguuagcucaagcUg.....      | 1   | 1 | j10 |
| .....cgggucggaguuagcucaGgCgg.....      | 1   | 1 | j10 |
| .....cgggAcggaguuagcucaagcgg.....      | 2   | 1 | j10 |
| .....cgggCcgaguuagcucaagcgg.....       | 2   | 1 | j10 |
| .....cggguUggaguuagcucaagcgg.....      | 1   | 1 | j10 |
| .....cgggGcggaguuagcucaagcgg.....      | 8   | 1 | j10 |
| .....cgggucggaguuagcucaCgCgg.....      | 2   | 1 | j10 |
| .....cgggucggaguuagcucaagcCg.....      | 1   | 1 | j10 |
| .....Agggucggaguuagcucaagcgg.....      | 1   | 1 | j10 |
| .....cgggucggagGuaagcucaagcgg.....     | 4   | 1 | j10 |
| .....Ugggucggaguuagcucaagcgg.....      | 1   | 1 | j10 |
| .....cCggucggaguuagcucaagcgg.....      | 1   | 1 | j10 |
| .....cgggucggaguuagcucaagAgg.....      | 1   | 1 | j10 |
| .....cgggucggaguuagcucaagcgg.....      | 389 | 0 | j10 |

cuaccgggucgggaguuagcucaagcgguuaccuccuacugcggacuucuaucuguccaucucugugcgggguuucgagaccgcgggugcuuacugaccuuuuuag

|                                        |     |   |     |
|----------------------------------------|-----|---|-----|
| .....cggCucggaguuagcucaagcgg.....      | 1   | 1 | j10 |
| .....cgUgucgggaguuagcucaagcgg.....     | 1   | 1 | j10 |
| .....cgggucgggaguuagcucaagcgg.....     | 571 | 0 | j10 |
| .....cgggucgggaguuagcucaagcgg.....     | 1   | 1 | j10 |
| .....cgggucgggaguuacCucaagcgg.....     | 1   | 1 | j10 |
| .....cgggucgggaguuagcuUaagcgg.....     | 1   | 1 | j10 |
| .....Ggggucgggaguuagcucaagcgg.....     | 2   | 1 | j10 |
| .....Agggucgggaguuagcucaagcgg.....     | 1   | 1 | j10 |
| .....cgggucgggaguuagcucaagcGÅ.....     | 1   | 1 | j10 |
| .....cgggCcgggaguuagcucaagcgg.....     | 5   | 1 | j10 |
| .....cgggucgggaguuagcucCagcgg.....     | 4   | 1 | j10 |
| .....cgggGcgggaguuagcucaagcgg.....     | 12  | 1 | j10 |
| .....cggguUgggaguuagcucaagcgg.....     | 2   | 1 | j10 |
| .....cgggucgUaguuagcucaagcgg.....      | 2   | 1 | j10 |
| .....cgggucgggaguuagcucaaUcgg.....     | 1   | 1 | j10 |
| .....cgggucgggaguuagcucaagcggÅ.....    | 13  | 1 | j10 |
| .....Ugggucgggaguuagcucaagcgg.....     | 1   | 1 | j10 |
| .....cgggucgggagGuaagcucaagcgg.....    | 2   | 1 | j10 |
| .....cgggucgggaguuagcucaagcGU.....     | 2   | 1 | j10 |
| .....cgggucgggaguuagcucaagcUgu.....    | 2   | 1 | j10 |
| .....cgggucgggagCuagcucaagcgg.....     | 3   | 1 | j10 |
| .....cgCucgggaguuagcucaagcgg.....      | 1   | 1 | j10 |
| .....cgggucgggaguuagcucaagcggC.....    | 4   | 1 | j10 |
| .....cgggucgggaguuagcCcaagcgg.....     | 2   | 1 | j10 |
| .....cgggucgggaguuagcucaCgcgg.....     | 2   | 1 | j10 |
| .....cgggucgggaguuagGuaagcgg.....      | 1   | 1 | j10 |
| .....cgggucgggaguuagÅucaagcgg.....     | 1   | 1 | j10 |
| .....cgggucgggaguuagcucaagcggG.....    | 4   | 1 | j10 |
| .....cgggÅcgggaguuagcucaagcgg.....     | 3   | 1 | j10 |
| .....cgggucgggaguuGgcucaagcgg.....     | 1   | 1 | j10 |
| .....cgggÅaggaguuagcucaagcgg.....      | 1   | 1 | j10 |
| .....cgggucgggaguuagcucaagcgguu.....   | 78  | 0 | j10 |
| .....cgggucgggaguuUcucaagcgguu.....    | 1   | 1 | j10 |
| .....cggCucgggaguuagcucaagcgguu.....   | 1   | 1 | j10 |
| .....cgggGcgggaguuagcucaagcgguu.....   | 2   | 1 | j10 |
| .....cggguUgggaguuagcucaagcgguu.....   | 1   | 1 | j10 |
| .....cgggucgggaguuagcucaCgcgguu.....   | 2   | 1 | j10 |
| .....cgggucgggagGuaagcucaagcgguu.....  | 1   | 1 | j10 |
| .....cgggucgggaguuagcucaagcggÅ.....    | 1   | 1 | j10 |
| .....cgggucgggaguuagcucaagcggÅ.....    | 32  | 1 | j10 |
| .....cgggucgggaguuagcucaagcgguc.....   | 1   | 1 | j10 |
| .....cgggucgggaguuagcucaagcggGÅ.....   | 1   | 1 | j10 |
| .....cgggucgggaguuagcucaagcgguuU.....  | 44  | 1 | j10 |
| .....cgggucgggaguuagcucaagcgguu.....   | 5   | 0 | j10 |
| .....cgggucgggaguuagcucaagcgguuÅ.....  | 24  | 1 | j10 |
| .....cgggucgggaguuagcucaagcgguuU.....  | 2   | 1 | j10 |
| .....cgggucgggaguuagcucaagcgguuac..... | 1   | 0 | j10 |
| .....gggucgggaguuagcucaagc.....        | 2   | 0 | j10 |
| .....gggucgggaguuagcucaagcgg.....      | 15  | 0 | j10 |
| .....gggucgggaguuagcucaagGgg.....      | 1   | 1 | j10 |
| .....gggucgggaguuagcucaagcggC.....     | 1   | 1 | j10 |
| .....gggucgggagÅuagcucaagcgg.....      | 1   | 1 | j10 |
| .....gggucgggaguuagcCcaagcgg.....      | 1   | 1 | j10 |
| .....gggGcgggaguuagcucaagcgg.....      | 1   | 1 | j10 |
| .....gggucgggaguuagcucaagcGU.....      | 1   | 1 | j10 |
| .....gggucgggaguuagcucaagcgg.....      | 75  | 0 | j10 |
| .....gggucgggaguuagcucaagcggG.....     | 1   | 1 | j10 |
| .....gggucgggaguuagcucGagcgg.....      | 1   | 1 | j10 |
| .....gggucgggaguuagcucaagcgguu.....    | 28  | 0 | j10 |
| .....gggucgggaguuagcucaagcggÅ.....     | 4   | 1 | j10 |
| .....gggGcgggaguuagcucaagcgguu.....    | 1   | 1 | j10 |
| .....gggucgggaguuagcucaagcgguuÅ.....   | 2   | 1 | j10 |
| .....gggucgggaguuagcucaagcgguuu.....   | 1   | 0 | j10 |
| .....gggucgggaguuagcucaagcgguuU.....   | 12  | 1 | j10 |
| .....gggucgggaguuagcucaagcgguuac.....  | 2   | 0 | j10 |
| .....gucgggaguuagcucaagcgg.....        | 2   | 0 | j10 |
| .....ggaguuagcucaagcgg.....            | 1   | 0 | j10 |
| .....ggaguuagcucaagcggG.....           | 1   | 1 | j10 |

cuaccgggucggaguuagcucaagcgguuaccuccucaugccggacuucuaucuguccaucugugcgggguucgagaccgcggggucuuacugaccuuuuuag

|                                      |    |   |     |
|--------------------------------------|----|---|-----|
| .....ggaguuagcucaagcgguu.....        | 1  | 0 | j10 |
| .....uuaccuccucaugccggacuuu.....     | 1  | 0 | j10 |
| .....uaccuccucaugccggacuuuc.....     | 1  | 0 | j10 |
| .....guucgagaccgcgggCgcu.....        | 1  | 1 | j10 |
| .....cgcgggAgcuuacugaccuu.....       | 1  | 1 | j10 |
| .....cgcgggugcuuaAugaccuu.....       | 1  | 1 | j10 |
| .....cgcgggugcuuacugaccuu.....       | 2  | 0 | j10 |
| .....cgcgggCgcuuacugaccuu.....       | 2  | 1 | j10 |
| .....cgcgggugcuuacugaccuu.....       | 1  | 1 | j10 |
| .....cgcgggAgcuuacugaccuu.....       | 2  | 1 | j10 |
| .....cgcgggugcuuacugaccuCu.....      | 1  | 1 | j10 |
| .....cgcgggugcuuacugaccuuA.....      | 1  | 1 | j10 |
| .....cgcgggugcuuacugaAccuu.....      | 1  | 1 | j10 |
| .....cgcgggugcuCacugaccuu.....       | 1  | 1 | j10 |
| .....cgcgggugcuuacugaccuu.....       | 49 | 0 | j10 |
| .....cgcgggugcuuacugaccuuC.....      | 1  | 1 | j10 |
| .....cgcgggAgcuuacugaccuuu.....      | 2  | 1 | j10 |
| .....cgcggaugcuuacugaccuuu.....      | 1  | 1 | j10 |
| .....cgcgggugcuuacugacAcuuu.....     | 1  | 1 | j10 |
| .....cgcgggCgcuuacugaccuuu.....      | 2  | 1 | j10 |
| .....cgcgggugcuuacugaccuuuA.....     | 1  | 1 | j10 |
| .....cgcgggugcuuacuUaccuuu.....      | 1  | 1 | j10 |
| .....cgcgggugcuuacugaccuuu.....      | 57 | 0 | j10 |
| .....cgcgggugcuuacugaccuuuA.....     | 5  | 1 | j10 |
| .....cgcgggugcuuacugaccuuu.....      | 2  | 0 | j10 |
| .....ccgggucggaguuagcucaagcggu.....  | 2  | 0 | j04 |
| .....cgggucggaguuagcucaagcgg.....    | 3  | 0 | j04 |
| .....cgCgucggaguuagcucaagcgg.....    | 1  | 1 | j04 |
| .....cgggucggaguuagGuaagcgg.....     | 1  | 1 | j04 |
| .....cgggucggaguuagcucaagcgg.....    | 58 | 0 | j04 |
| .....cgggucggaguuagcuAaagcgg.....    | 1  | 1 | j04 |
| .....cgggucggaguuagcucaagcggC.....   | 2  | 1 | j04 |
| .....cgggucggaguuagcucaCgcggu.....   | 1  | 1 | j04 |
| .....cgggucggaguuagcucaagcgg.....    | 38 | 0 | j04 |
| .....cgggucggaguuagcucaagcggA.....   | 1  | 1 | j04 |
| .....cgggucggaguuagcucaagcgguu.....  | 1  | 0 | j04 |
| .....gggucggaguuagcucaagcgg.....     | 2  | 0 | j04 |
| .....gggucggaguuagcucaagcggA.....    | 4  | 1 | j04 |
| .....gggucggaguuagcucaagcgg.....     | 9  | 0 | j04 |
| .....gggucggaguuagcucaagcggA.....    | 1  | 1 | j04 |
| .....cgcgggugcuuacugaccuu.....       | 3  | 0 | j04 |
| .....ccgggucggaguuagcucaagcgg.....   | 1  | 0 | va2 |
| .....cgggucggaguuagcucaagcgg.....    | 8  | 0 | va2 |
| .....cgggucggaguuagcucaagcgg.....    | 1  | 0 | va2 |
| .....cgggucggaguuagcucaagcgguu.....  | 1  | 0 | va2 |
| .....cgcgggugcuuacugaccuu.....       | 1  | 0 | va2 |
| .....cgcgggugcuuacuUaccuu.....       | 1  | 1 | va2 |
| .....cgcgggugcuuacugaccuu.....       | 10 | 0 | va2 |
| .....cAcgggugcuuacugaccuu.....       | 1  | 1 | va2 |
| .....cgcgggugcuuacugacAcuuu.....     | 1  | 1 | va2 |
| .....cgcgggugcuuacugaccuuu.....      | 13 | 0 | va2 |
| .....cgcgggugcuuacugaccuuCu.....     | 1  | 1 | va2 |
| .....cgcgggugcuuacugaccuuu.....      | 2  | 0 | va2 |
| .....ccgggucggaguuagcucaagcgg.....   | 2  | 0 | j02 |
| .....ccgggucggaguuagcucaagcgg.....   | 3  | 0 | j02 |
| .....ccgggucggaguuagcucaagcggA.....  | 1  | 1 | j02 |
| .....ccgggucggaguuagcucaagcggCu..... | 1  | 1 | j02 |
| .....ccgggucggaguuagcucaagcgggu..... | 2  | 0 | j02 |
| .....ccgggucggaguuagcucaagcggA.....  | 1  | 1 | j02 |
| .....cgggucggaguuagcuca.....         | 1  | 0 | j02 |
| .....cgggCcgaguuagcuca.....          | 1  | 1 | j02 |
| .....cgggucggaguuagcucaag.....       | 1  | 0 | j02 |
| .....cgggucggaguuagcucaagc.....      | 2  | 0 | j02 |
| .....cgggGcggaguuagcucaagcgg.....    | 2  | 1 | j02 |
| .....cgggucggaguuagcucaagcA.....     | 1  | 1 | j02 |
| .....cgggucggaguuagcucaagcgg.....    | 24 | 0 | j02 |



cuaccgggucgggaguuagcucaagcgguuuaccuccuacugcgggacuuuauucuguccaucucugugcgggguuucgagaccgcggggugcuuacugacccuuuuuag

|                                       |     |   |     |
|---------------------------------------|-----|---|-----|
| .....cgggucgggaguuagcucaagUg.....     | 1   | 1 | j02 |
| .....cgggucgggaguuagcucaagcgg.....    | 2   | 1 | j02 |
| .....cgggGcgggaguuagcucaagcgg.....    | 4   | 1 | j02 |
| .....cgggucgggaguuagcucaaCcg.....     | 1   | 1 | j02 |
| .....cgggAcgggaguuagcucaagcgg.....    | 6   | 1 | j02 |
| .....cgggucgggaguuagcucaagAgg.....    | 2   | 1 | j02 |
| .....Ugggucgggaguuagcucaagcgg.....    | 2   | 1 | j02 |
| .....cgggucgggaguuagcucCagcgg.....    | 2   | 1 | j02 |
| .....cgggucgggaguuagcuaaagcgg.....    | 2   | 1 | j02 |
| .....cgggucgggCguuagcucaagcgg.....    | 4   | 1 | j02 |
| .....cgggCcgaguuagcucaagcgg.....      | 2   | 1 | j02 |
| .....cgggucgggaguuagcucaagcGla.....   | 2   | 1 | j02 |
| .....cgggucgggaguuUfcuacagcgg.....    | 3   | 1 | j02 |
| .....cgggucgggaguuagcucaagcGp.....    | 1   | 1 | j02 |
| .....cgggucgggaguuCgcucaagcgg.....    | 1   | 1 | j02 |
| .....cgggucgggaguuagcucUagcgg.....    | 1   | 1 | j02 |
| .....cgggucgggaguuagcucaagcUg.....    | 1   | 1 | j02 |
| .....cgggucgggaguuagcucaagcgg.....    | 219 | 0 | j02 |
| .....cgggucgggaguuagcucaaUcgg.....    | 1   | 1 | j02 |
| .....cgggucgggaguuagcucaCgcgg.....    | 1   | 1 | j02 |
| .....cCggucgggaguuagcucaagcgggu.....  | 1   | 1 | j02 |
| .....cgggucgggaguuagcucaagAggu.....   | 1   | 1 | j02 |
| .....cgggucgggaguuacCucaagcgggu.....  | 1   | 1 | j02 |
| .....cgggucUgaguuagcucaagcgggu.....   | 1   | 1 | j02 |
| .....cgggucgggaguuagcucaagcggG.....   | 2   | 1 | j02 |
| .....cgggucgggaguuUfcuacagcgggu.....  | 2   | 1 | j02 |
| .....cgggucgggaguuagcucaagcggla.....  | 16  | 1 | j02 |
| .....cgggucgggaguuaglucaagcgggu.....  | 2   | 1 | j02 |
| .....cgggucgggaguuagcucaaUcgggu.....  | 4   | 1 | j02 |
| .....cgggucgggaguuagcucaagcggc.....   | 3   | 1 | j02 |
| .....cgggucgggaguuagcucCagcgggu.....  | 4   | 1 | j02 |
| .....cgggucCgaguuagcucaagcgggu.....   | 1   | 1 | j02 |
| .....Ugggucgggaguuagcucaagcgggu.....  | 1   | 1 | j02 |
| .....cgggucgggaguuCgcucaagcgggu.....  | 1   | 1 | j02 |
| .....cgggucgggaguuagcucaagcgggu.....  | 202 | 0 | j02 |
| .....cgggucgggaguuagcGcaagcgggu.....  | 1   | 1 | j02 |
| .....cgggucgggCguuagcucaagcgggu.....  | 3   | 1 | j02 |
| .....cggguUggaguuagcucaagcgggu.....   | 1   | 1 | j02 |
| .....cggguAaggaguuagcucaagcgggu.....  | 2   | 1 | j02 |
| .....cgggGcgggaguuagcucaagcgggu.....  | 1   | 1 | j02 |
| .....cgggCcgaguuagcucaagcgggu.....    | 4   | 1 | j02 |
| .....cgggucgUaguuagcucaagcgggu.....   | 2   | 1 | j02 |
| .....cgggucgggUguuagcucaagcgggu.....  | 1   | 1 | j02 |
| .....cgggAcgggaguuagcucaagcgggu.....  | 2   | 1 | j02 |
| .....cgggucgggaguuagcucaCgcgggu.....  | 1   | 1 | j02 |
| .....cgggucgggaguuagcucaagcGpu.....   | 1   | 1 | j02 |
| .....cgggucgggCguuagcucaagcgggu.....  | 2   | 1 | j02 |
| .....cgggucgggaguuagcucaagcgggu.....  | 19  | 0 | j02 |
| .....cgggucgggaguuagcucaagcggula..... | 11  | 1 | j02 |
| .....cgggucgggaguuagcucaagcggdu.....  | 1   | 1 | j02 |
| .....cgggucgggaguuagcucaagcgguc.....  | 2   | 1 | j02 |
| .....cgggucgggaguuagcucaagcggula..... | 5   | 1 | j02 |
| .....cgggucgggaguuagcucaagcgguga..... | 1   | 1 | j02 |
| .....cgggucgggaguuagcucaagcgguuU..... | 4   | 1 | j02 |
| .....gggucgggaguuagcucaagcgg.....     | 6   | 0 | j02 |
| .....gggucgggaguuagcucaagcgggu.....   | 12  | 0 | j02 |
| .....gggucgggaguuagcucaagcgggu.....   | 1   | 0 | j02 |
| .....gggucgggaguuagcucaagcggguu.....  | 1   | 0 | j02 |
| .....gggucgggaguuagcucaagcggguU.....  | 2   | 1 | j02 |
| .....gggaguuagcucaagcgggu.....        | 2   | 0 | j02 |
| .....ggaguuagcucaagcggc.....          | 1   | 1 | j02 |
| .....uaccuccuacugcggCcuu.....         | 1   | 1 | j02 |
| .....cgcgggugUuuacugacccu.....        | 1   | 1 | j02 |
| .....cgcgggugcuuacugacccu.....        | 3   | 0 | j02 |
| .....cgcgggugcuuacugacccuG.....       | 1   | 1 | j02 |
| .....Ugcgggugcuuacugacccu.....        | 1   | 1 | j02 |
| .....cgcgggugcuuUugacccu.....         | 1   | 1 | j02 |
| .....cgcgAgugcuuacugacccu.....        | 1   | 1 | j02 |
| .....Agcgggugcuuacugacccu.....        | 1   | 1 | j02 |

cuaccgggucggaguuagcucaagcgguuaccuccuacugcgggacuuucuaucuguccaucucugucgggguuucgagaccgcggggugcuuacugacccuuuaug

|                                     |    |   |     |
|-------------------------------------|----|---|-----|
| .....cgcgggugcuuacGgacccuu.....     | 1  | 1 | j02 |
| .....cgcgggugcuuacugacccuA.....     | 1  | 1 | j02 |
| .....cgcgggGgcuuacugacccuu.....     | 1  | 1 | j02 |
| .....cgcgggugcuuacugacccuu.....     | 1  | 1 | j02 |
| .....cgcgggugcuuacugacccuu.....     | 19 | 0 | j02 |
| .....cgcgggugcuuacugacccuuu.....    | 7  | 0 | j02 |
| ..accgggucggaguuagcucaagc.....      | 1  | 0 | k14 |
| ....cgggucggCguuagcucaagcgg.....    | 1  | 1 | k14 |
| ....cgggucggaguuagcucaagcgg.....    | 6  | 0 | k14 |
| ....cgggucggaguuagcucaagcggg.....   | 7  | 0 | k14 |
| ....cgggucggaguuagcucaagcggG.....   | 2  | 1 | k14 |
| ....gggucggaguuagcucaagcgg.....     | 1  | 0 | k14 |
| ....gggucggaguuagcucaagcggg.....    | 9  | 0 | k14 |
| ....gggucggaguuagcucaagcggG.....    | 1  | 1 | k14 |
| ....gggucggaguuUcucaagcggg.....     | 1  | 1 | k14 |
| ....Aggucggaguuagcucaagcgggu.....   | 1  | 1 | k14 |
| ....gggucggaguuagcucaagcggG.....    | 1  | 1 | k14 |
| ....gggucggaguuagcucaagcgggu.....   | 5  | 0 | k14 |
| .....cgcgggugcuuacugacccuu.....     | 5  | 0 | k14 |
| .....cgcgggugcuuacugacccuuu.....    | 3  | 0 | k14 |
| ....cgggucggaguuagcucaagcggg.....   | 1  | 0 | j31 |
| ..accgggucggagCuaagcuc.....         | 1  | 1 | j27 |
| ....cccgggucggaguuagcucaagcggg..... | 1  | 0 | j27 |
| ....ccgggucggaguuagcucaagcggg.....  | 2  | 0 | j27 |
| ....ccgggucggaguuagcucaagcggg.....  | 2  | 0 | j27 |
| ....cgggucggaguuagcucaagcgg.....    | 1  | 0 | j27 |
| ....cgggucggaguuagcucaagcggg.....   | 29 | 0 | j27 |
| ....cgggucggaguuagcucaagcgg.....    | 1  | 1 | j27 |
| ....cgggucggaguuagcucaagcggA.....   | 1  | 1 | j27 |
| ....cgggucggaguuagcucaagcggU.....   | 1  | 1 | j27 |
| ....cgggucggaguuUcucaagcggg.....    | 1  | 1 | j27 |
| ....cgggucggagCuuagcucaagcggg.....  | 1  | 1 | j27 |
| ....cgggucggaguuagcAaagcggg.....    | 1  | 1 | j27 |
| ....cgggucggaguuagcucaagcggg.....   | 1  | 1 | j27 |
| ....cgggucggaguuagcucaagcggg.....   | 19 | 0 | j27 |
| ....cgggucggagCuuagcucaagcggg.....  | 1  | 1 | j27 |
| ....cgggucggaguuagcucaagcggg.....   | 8  | 0 | j27 |
| ....cgggucggaguuagcucaagcggg.....   | 1  | 1 | j27 |
| ....gggucggaguuagcucaagcggg.....    | 4  | 0 | j27 |
| ....gggucggaguuagcucaagcggG.....    | 1  | 1 | j27 |
| ....gggucggaguuagcucaagcggg.....    | 14 | 0 | j27 |
| ....gggucggaguuagcucaagcggg.....    | 42 | 0 | j27 |
| ....ggCucggaguuagcucaagcggg.....    | 1  | 1 | j27 |
| ....gggucggaguuagcucaagcggg.....    | 1  | 1 | j27 |
| ....gggucggaguuagcucaagcggg.....    | 1  | 1 | j27 |
| ....gggucggaguuagcucaagcggg.....    | 1  | 1 | j27 |
| .....uaccuccuacugcgggacuuu.....     | 1  | 0 | j27 |
| .....ccuccuacugcgggacuuu.....       | 1  | 0 | j27 |
| .....guucgagaccgcgggCg.....         | 1  | 1 | j27 |
| .....cgcgggugcuuacugacccu.....      | 1  | 0 | j27 |
| .....cgcgggugcuuacugacccuA.....     | 1  | 1 | j27 |
| .....cgcgggugUuuacugacccuu.....     | 1  | 1 | j27 |
| .....cgcgggGcguuacugacccuu.....     | 1  | 1 | j27 |
| .....cgcgggugcuuacugacccuu.....     | 17 | 0 | j27 |
| .....cgcgggugcuuacugacccuuu.....    | 2  | 0 | j27 |
| .....cgcgggugcuuacugacUuuu.....     | 1  | 1 | j27 |
| .....cgcgggugcuuacugacccuuuA.....   | 1  | 1 | j27 |
| ....cgggucggaguuagcuAaagcg.....     | 1  | 1 | j05 |
| ....cgggucggaguuagcAuaagcg.....     | 1  | 1 | j05 |
| ....cgggucggaguuagcucaagcgg.....    | 6  | 0 | j05 |
| ....cgggucggaguuagcucaagcggg.....   | 9  | 0 | j05 |
| ....cgggAcgaguuagcucaagcggg.....    | 1  | 1 | j05 |
| ....cgggucggaguuagcucaagcggg.....   | 37 | 0 | j05 |
| ....cgggCcgaguuagcucaagcggg.....    | 1  | 1 | j05 |
| ....cgggucggaguuagcucaagcggC.....   | 2  | 1 | j05 |

cuaccgggucggaguuagcucaagcgguuaccuccuacugcggacuuucuaucuguccaucucugugcgggguuucgagaccgcgggucuuacugaccuuuuuag

|           |     |   |     |
|-----------|-----|---|-----|
| . . . . . | 1   | 1 | s03 |
| . . . . . | 2   | 0 | s03 |
| . . . . . | 2   | 0 | s03 |
| . . . . . | 7   | 0 | s03 |
| . . . . . | 1   | 1 | s03 |
| . . . . . | 1   | 0 | s03 |
| . . . . . | 21  | 0 | s03 |
| . . . . . | 1   | 1 | s03 |
| . . . . . | 1   | 1 | s03 |
| . . . . . | 1   | 1 | s03 |
| . . . . . | 2   | 1 | s03 |
| . . . . . | 1   | 1 | s03 |
| . . . . . | 79  | 0 | s03 |
| . . . . . | 1   | 1 | s03 |
| . . . . . | 1   | 1 | s03 |
| . . . . . | 6   | 1 | s03 |
| . . . . . | 1   | 1 | s03 |
| . . . . . | 16  | 0 | s03 |
| . . . . . | 1   | 1 | s03 |
| . . . . . | 1   | 1 | s03 |
| . . . . . | 2   | 0 | s03 |
| . . . . . | 7   | 1 | s03 |
| . . . . . | 1   | 1 | s03 |
| . . . . . | 1   | 0 | s03 |
| . . . . . | 1   | 0 | s03 |
| . . . . . | 3   | 0 | s03 |
| . . . . . | 2   | 1 | s03 |
| . . . . . | 17  | 0 | s03 |
| . . . . . | 1   | 1 | s03 |
| . . . . . | 17  | 1 | s03 |
| . . . . . | 2   | 1 | s03 |
| . . . . . | 1   | 1 | s03 |
| . . . . . | 1   | 1 | s03 |
| . . . . . | 37  | 0 | s03 |
| . . . . . | 1   | 1 | s03 |
| . . . . . | 56  | 1 | s03 |
| . . . . . | 1   | 1 | s03 |
| . . . . . | 7   | 0 | s03 |
| . . . . . | 1   | 1 | s03 |
| . . . . . | 13  | 1 | s03 |
| . . . . . | 1   | 1 | s03 |
| . . . . . | 1   | 1 | s03 |
| . . . . . | 8   | 0 | s03 |
| . . . . . | 13  | 0 | s03 |
| . . . . . | 1   | 1 | s03 |
| . . . . . | 2   | 1 | s03 |
| . . . . . | 1   | 1 | s03 |
| . . . . . | 1   | 1 | s03 |
| . . . . . | 203 | 0 | s03 |
| . . . . . | 1   | 1 | s03 |
| . . . . . | 3   | 1 | s03 |
| . . . . . | 1   | 1 | s03 |
| . . . . . | 3   | 1 | s03 |
| . . . . . | 1   | 1 | s03 |
| . . . . . | 2   | 1 | s03 |
| . . . . . | 1   | 1 | s03 |
| . . . . . | 1   | 1 | s03 |
| . . . . . | 3   | 1 | s03 |
| . . . . . | 2   | 1 | s03 |
| . . . . . | 3   | 1 | s03 |
| . . . . . | 1   | 1 | s03 |
| . . . . . | 2   | 1 | s03 |
| . . . . . | 2   | 1 | s03 |
| . . . . . | 1   | 1 | s03 |
| . . . . . | 1   | 1 | s03 |

cuaccgggucggaguuagcucaagcgguuaccuccuacugcgggacuuucuaucuguccaucucugucgggguuucgagaccgcgggugcuuacugaccuuuuuag

|                                      |      |   |     |
|--------------------------------------|------|---|-----|
| ...ccgggucggagCuagcucaagcgggu.....   | 1    | 1 | s03 |
| ...cGgggucggaguuagcucaagcgggu.....   | 2    | 1 | s03 |
| ...ccgggucggaguuagcucaagcggc.....    | 3    | 1 | s03 |
| ...ccgggucggaguuagcucaagcgggu.....   | 338  | 0 | s03 |
| ...ccgggucggaguuagcucaagcgggA.....   | 8    | 1 | s03 |
| ...ccgggucggaguuagcucaagcggG.....    | 4    | 1 | s03 |
| ...ccgggucggaguuagcucaagcgggu.....   | 44   | 0 | s03 |
| ...ccgggucggaguuagcucaagcgggAu.....  | 1    | 1 | s03 |
| ...ccgggucggagGuaagcucaagcgggu.....  | 1    | 1 | s03 |
| ...ccgggucggaguuagcucaagcgggA.....   | 5    | 1 | s03 |
| ...ccgggucggaguuagcucaagcggguC.....  | 1    | 1 | s03 |
| ...ccgggucggaguuagcucaagcggguu.....  | 3    | 0 | s03 |
| ...ccgggucggaguuagcucaagcggguuU..... | 21   | 1 | s03 |
| ...ccgggucggaguuagcucaagcggguA.....  | 3    | 1 | s03 |
| ...cgggucggaguuagcucaag.....         | 5    | 0 | s03 |
| ...Ggggucggaguuagcucaagc.....        | 1    | 1 | s03 |
| ...cgggGcggaguuagcucaagc.....        | 2    | 1 | s03 |
| ...cgggucgggAuuagcucaagc.....        | 1    | 1 | s03 |
| ...cgggAcggaguuagcucaagc.....        | 1    | 1 | s03 |
| ...cgggucggagGuaagcucaagc.....       | 1    | 1 | s03 |
| ...cgggucggaguuagcucaagc.....        | 53   | 0 | s03 |
| ...cgggucggaguuagcucaagcA.....       | 2    | 1 | s03 |
| ...cgggucggagCuagcucaagcgg.....      | 2    | 1 | s03 |
| ...cgggGcggaguuagcucaagcgg.....      | 14   | 1 | s03 |
| ...cgggucggaguuagcucaaCcg.....       | 1    | 1 | s03 |
| ...cgggucggaguuagcucaagcU.....       | 1    | 1 | s03 |
| ...cgggucggagGuaagcucaagcgg.....     | 4    | 1 | s03 |
| ...cgggucggaguuagcucaagcgg.....      | 150  | 0 | s03 |
| ...cgAgucggaguuagcucaagcgg.....      | 1    | 1 | s03 |
| ...cgggucUgaguuagcucaagcgg.....      | 1    | 1 | s03 |
| ...cgggAcggaguuagcucaagcgg.....      | 1    | 1 | s03 |
| ...cgggucGcaguuagcucaagcgg.....      | 1    | 1 | s03 |
| ...cgggucggaguuagcuAaagcgg.....      | 3    | 1 | s03 |
| ...cgggucGcaguuagcucaagcgg.....      | 1    | 1 | s03 |
| ...Ggggucggaguuagcucaagcgg.....      | 6    | 1 | s03 |
| ...cgggucggagCuagcucaagcgg.....      | 6    | 1 | s03 |
| ...cgggucggaguuagcucaagcggA.....     | 17   | 1 | s03 |
| ...cgggucggaguuagcucUagcgg.....      | 3    | 1 | s03 |
| ...cgggucggaguuagcucaagUgg.....      | 7    | 1 | s03 |
| ...cgggucggaguuagcucaUgcgg.....      | 6    | 1 | s03 |
| ...cGggucggaguuagcucaagcgg.....      | 5    | 1 | s03 |
| ...cgggucggaguuagcucaaUcgg.....      | 7    | 1 | s03 |
| ...cgggucggaguuagcGcaagcgg.....      | 4    | 1 | s03 |
| ...cgggCcggaguuagcucaagcgg.....      | 20   | 1 | s03 |
| ...cUggucggaguuagcucaagcgg.....      | 5    | 1 | s03 |
| ...cgggucggagGuaagcucaagcgg.....     | 47   | 1 | s03 |
| ...cgggucggaguuagcucaCgcgg.....      | 1    | 1 | s03 |
| ...cgggucggaguuagGuaagcgg.....       | 1    | 1 | s03 |
| ...cgggucggaguuagUuaagcgg.....       | 2    | 1 | s03 |
| ...cggCucggaguuagcucaagcgg.....      | 1    | 1 | s03 |
| ...cgggucgggAuuagcucaagcgg.....      | 1    | 1 | s03 |
| ...cgggucAgaguuagcucaagcgg.....      | 2    | 1 | s03 |
| ...cgggGcggaguuagcucaagcgg.....      | 238  | 1 | s03 |
| ...cgggucggaguuagcucaagcgg.....      | 3951 | 0 | s03 |
| ...cggguUggaguuagcucaagcgg.....      | 3    | 1 | s03 |
| ...cgggucggaguuagcuUaagcgg.....      | 1    | 1 | s03 |
| ...cggUucggaguuagcucaagcgg.....      | 3    | 1 | s03 |
| ...cgggucggaguuauUcucaagcgg.....     | 1    | 1 | s03 |
| ...cgggucggaguuagcucaagcAg.....      | 1    | 1 | s03 |
| ...Agggucggaguuagcucaagcgg.....      | 3    | 1 | s03 |
| ...cgCgucggaguuagcucaagcgg.....      | 2    | 1 | s03 |
| ...cggguAaggaguuagcucaagcgg.....     | 3    | 1 | s03 |
| ...cgAgucggaguuagcucaagcgg.....      | 1    | 1 | s03 |
| ...cgggucgggAuagcucaagcgg.....       | 2    | 1 | s03 |
| ...cgggucggaguuagcCcaagcgg.....      | 1    | 1 | s03 |
| ...cgggucggaguuagAucaagcgg.....      | 6    | 1 | s03 |
| ...cgggucggaguuagcucaGgcgg.....      | 3    | 1 | s03 |
| ...cgggucggaguuagGagcucaagcgg.....   | 9    | 1 | s03 |
| ...cgggucggaguuagcucaagcUg.....      | 3    | 1 | s03 |

cuaccgggucgggaguuagcucaagcgguuaccuccuacugcgggacuuucuaucuguccaucucugugcgggguuucgagaccgcgggugcuuacugaccuuuuuug

|                                      |       |   |     |
|--------------------------------------|-------|---|-----|
| .....Ugggucgggaguuagcucaagcgg.....   | 4     | 1 | s03 |
| .....cgggucgggaguuagcAcaagcgg.....   | 1     | 1 | s03 |
| .....cgggucgggUguuagcucaagcgg.....   | 1     | 1 | s03 |
| .....cgggucgggaguuagcucGagcgg.....   | 2     | 1 | s03 |
| .....cgggucgggaguuagcucaaCcg.....    | 2     | 1 | s03 |
| .....cgUgucgggaguuagcucaagcgg.....   | 1     | 1 | s03 |
| .....cgggucgggGuuuagcucaagcgg.....   | 1     | 1 | s03 |
| .....cgggucgggaguuagcucaagcGU.....   | 16    | 1 | s03 |
| .....cgggAcgggaguuagcucaagcgg.....   | 13    | 1 | s03 |
| .....cAggucgggaguuagcucaagcgg.....   | 1     | 1 | s03 |
| .....Ggggucgggaguuagcucaagcgg.....   | 32    | 1 | s03 |
| .....Ugggucgggaguuagcucaagcgg.....   | 19    | 1 | s03 |
| .....cgggucgggaguuagcucaUgcgg.....   | 14    | 1 | s03 |
| .....cgggucgggaguuagcucaagcGCu.....  | 2     | 1 | s03 |
| .....cgggucgggaguuagcucaagcAGu.....  | 3     | 1 | s03 |
| .....cgggucgggaguuGgcucaagcgg.....   | 1     | 1 | s03 |
| .....cgggCcgaguuagcucaagcgg.....     | 62    | 1 | s03 |
| .....cgggucgggaguuagcucaaCcg.....    | 1     | 1 | s03 |
| .....cgggucgggaguuagGUcaagcgg.....   | 1     | 1 | s03 |
| .....cGggucgggaguuagcucaagcgg.....   | 8     | 1 | s03 |
| .....cgggucgggaguuagcucaagcggG.....  | 23    | 1 | s03 |
| .....cgggucgggaguuagcGcaagcgg.....   | 7     | 1 | s03 |
| .....cgggucgggaguuCagcucaagcgg.....  | 1     | 1 | s03 |
| .....cgggucgggaguuagcucaagcGU.....   | 5     | 1 | s03 |
| .....cgggucgggCguuagcucaagcgg.....   | 4     | 1 | s03 |
| .....cgggucgggaguuagGUcaagcgg.....   | 7     | 1 | s03 |
| .....cgggGcgaguuagcucaagcgg.....     | 710   | 1 | s03 |
| .....cggguAggaguuagcucaagcgg.....    | 16    | 1 | s03 |
| .....cgggucgggaguuagcucaaAcgg.....   | 2     | 1 | s03 |
| .....cgggucgggGuuuagcucaagcgg.....   | 2     | 1 | s03 |
| .....cgggucgggaguuagcucaagcggC.....  | 133   | 1 | s03 |
| .....cgggucgggAUuuagcucaagcgg.....   | 4     | 1 | s03 |
| .....cggGUcgggaguuagcucaagcgg.....   | 2     | 1 | s03 |
| .....cgggucgggaguuagcucaagcGU.....   | 4     | 1 | s03 |
| .....cgggucgggACuuagcucaagcgg.....   | 3     | 1 | s03 |
| .....cUggucgggaguuagcucaagcgg.....   | 11    | 1 | s03 |
| .....cgggucgggaguuagGUcaagcgg.....   | 9     | 1 | s03 |
| .....cggguUggaguuagcucaagcgg.....    | 5     | 1 | s03 |
| .....cgggucgggaguuagcucaagcggA.....  | 143   | 1 | s03 |
| .....cgggucgggAGuagcucaagcgg.....    | 5     | 1 | s03 |
| .....cgggucgggaguuCGcucaagcgg.....   | 1     | 1 | s03 |
| .....cgggucgggaguuagcucaagAGg.....   | 2     | 1 | s03 |
| .....cgggucgggaguuagcuUaagcgg.....   | 3     | 1 | s03 |
| .....cgggucgggagUGagcucaagcgg.....   | 18    | 1 | s03 |
| .....cgggAcgggaguuagcucaagcgg.....   | 33    | 1 | s03 |
| .....cgUgucgggaguuagcucaagcgg.....   | 9     | 1 | s03 |
| .....cgggucgggaguuagcucaGgcgg.....   | 8     | 1 | s03 |
| .....cgggucCgaguuagcucaagcgg.....    | 1     | 1 | s03 |
| .....cggCucgggaguuagcucaagcgg.....   | 1     | 1 | s03 |
| .....cAggucgggaguuagcucaagcgg.....   | 2     | 1 | s03 |
| .....cgggucUgaguuagcucaagcgg.....    | 1     | 1 | s03 |
| .....cgggucgggaguuagcucaaUcg.....    | 20    | 1 | s03 |
| .....cgggucgggaguuACcucaagcgg.....   | 2     | 1 | s03 |
| .....cgggucgggaguuagcuUaagcgg.....   | 13    | 1 | s03 |
| .....cgggucgggaguuUgcucaagcgg.....   | 1     | 1 | s03 |
| .....cgggucgggagCUagcucaagcgg.....   | 10    | 1 | s03 |
| .....cgggucgggaguuagcCcaagcgg.....   | 1     | 1 | s03 |
| .....cgAGucgggaguuagcucaagcgg.....   | 4     | 1 | s03 |
| .....cgggucgggaguuagcucaagUgg.....   | 17    | 1 | s03 |
| .....cgCgucgggaguuagcucaagcgg.....   | 3     | 1 | s03 |
| .....cgggucgggaguuAAcucaagcgg.....   | 1     | 1 | s03 |
| .....cgggucgggaguuagcuGaaagcgg.....  | 4     | 1 | s03 |
| .....cgggucgggaguuagcucaagcgg.....   | 10621 | 0 | s03 |
| .....cgggucgggaguuagcucGagcgg.....   | 4     | 1 | s03 |
| .....cgggucgLAGuuagcucaagcgg.....    | 1     | 1 | s03 |
| .....cgggucgggUguuagcucaagcgg.....   | 2     | 1 | s03 |
| .....cggguGggaguuagcucaagcgg.....    | 1     | 1 | s03 |
| .....cgggucgggaguuagcucaagcGAGu..... | 3     | 1 | s03 |
| .....cgggucgggAGuagcucaagcgg.....    | 183   | 1 | s03 |

cuaccgggucgggaguuagcucaagcgguuaccuccuacugcgggacuuucuaucuguccaucucugugcgggguuucgagaccgcgggugcuuacugaccuuuuuag

|                                          |      |   |     |
|------------------------------------------|------|---|-----|
| .....Agggucgggaguuagcucaagcgggu.....     | 18   | 1 | s03 |
| .....cgggucgggaguuagcucUagcgggu.....     | 6    | 1 | s03 |
| .....cgggucgggaguuagcucaCgcggu.....      | 3    | 1 | s03 |
| .....cgggucAggaguuagcucaagcgggu.....     | 3    | 1 | s03 |
| .....cgggucgUaguuagcucaagcgggu.....      | 2    | 1 | s03 |
| .....cgggucgggaguuUfcucaagcgggu.....     | 3    | 1 | s03 |
| .....cgggucgggaguuagcucaagcggGu.....     | 6    | 1 | s03 |
| .....cgggucgggaguuagcucaagcggUuu.....    | 3    | 1 | s03 |
| .....cgggGcgggaguuagcucaagcgggu.....     | 91   | 1 | s03 |
| .....cgggucgggaguuagcucUagcgggu.....     | 2    | 1 | s03 |
| .....cgggCcgaguuagcucaagcgggu.....       | 6    | 1 | s03 |
| .....cgggAcggaguuagcucaagcgggu.....      | 7    | 1 | s03 |
| .....cgggucgggaguuagUucaagcgggu.....     | 1    | 1 | s03 |
| .....cCggucgggaguuagcucaagcgggu.....     | 2    | 1 | s03 |
| .....cgggucgggaguuagcucaagUgggu.....     | 4    | 1 | s03 |
| .....cgggucgggaguuagcucGagcgggu.....     | 1    | 1 | s03 |
| .....cgggucggCguuagcucaagcgggu.....      | 1    | 1 | s03 |
| .....cggguAaggaguuagcucaagcgggu.....     | 1    | 1 | s03 |
| .....cgggucgggaguuagcucaagcggCu.....     | 14   | 1 | s03 |
| .....cgggucgggaguuagcucaagcgggu.....     | 1162 | 0 | s03 |
| .....cgggucgggaguuagcucaagcggAu.....     | 11   | 1 | s03 |
| .....cgggucgggaguuagcucaagcgggu.....     | 1    | 1 | s03 |
| .....Agggucgggaguuagcucaagcgggu.....     | 3    | 1 | s03 |
| .....cgggucgggagCuagcucaagcgggu.....     | 1    | 1 | s03 |
| .....cgggucgggaguuagcucCagcgggu.....     | 1    | 1 | s03 |
| .....cgggucgggaguuagcucaagcggG.....      | 12   | 1 | s03 |
| .....cgggucgggaguuagcucaagcggAu.....     | 350  | 1 | s03 |
| .....cgggucgggaguuagcCcaagcgggu.....     | 1    | 1 | s03 |
| .....cgggucgggaguuagcucaagcgguC.....     | 4    | 1 | s03 |
| .....cgCgucgggaguuagcucaagcgggu.....     | 1    | 1 | s03 |
| .....cgggucgggaguuagcucaaUcggu.....      | 1    | 1 | s03 |
| .....Ggggucgggaguuagcucaagcgggu.....     | 2    | 1 | s03 |
| .....Ugggucgggaguuagcucaagcgggu.....     | 2    | 1 | s03 |
| .....cgggucgggaguuagcuAaagcgggu.....     | 3    | 1 | s03 |
| .....cgggucgggaguuUfcucaagcgggu.....     | 1    | 1 | s03 |
| .....cgggucgggaguuagcucaagcgggu.....     | 2    | 1 | s03 |
| .....cUggucgggaguuagcucaagcgggu.....     | 1    | 1 | s03 |
| .....cggguUgggaguuagcucaagcgggu.....     | 1    | 1 | s03 |
| .....cgggucgggaguuagcucaagcgggu.....     | 15   | 1 | s03 |
| .....cgggucgggaguuagcucaUgcgggu.....     | 6    | 1 | s03 |
| .....Agggucgggaguuagcucaagcgggu.....     | 1    | 1 | s03 |
| .....cgggucgggaguuagcucaagcggguU.....    | 455  | 1 | s03 |
| .....Ggggucgggaguuagcucaagcgggu.....     | 1    | 1 | s03 |
| .....cgggucgggaguuagcucaagcggguC.....    | 7    | 1 | s03 |
| .....cgggGcgggaguuagcucaagcgggu.....     | 4    | 1 | s03 |
| .....cgggucgggaguuagcucaagcggguG.....    | 2    | 1 | s03 |
| .....cgggucgggaguuagcucaagcggguA.....    | 138  | 1 | s03 |
| .....cgggucgggaguuagcucaagcgggu.....     | 1    | 1 | s03 |
| .....cgggucgggaguuagcucaagcgggu.....     | 2    | 1 | s03 |
| .....cgggucgggaguuagcucaagcgggu.....     | 35   | 0 | s03 |
| .....cgggucgggaguuagcucaagcggguAac.....  | 1    | 1 | s03 |
| .....cgggucgggaguuagcucaagcggguUfc.....  | 1    | 1 | s03 |
| .....cgggucgggaguuagcucaagcggguU.....    | 16   | 1 | s03 |
| .....cgggucgggaguuagcucaagcggguA.....    | 2    | 1 | s03 |
| .....cgggucgggaguuagcucaagcggguuac.....  | 2    | 0 | s03 |
| .....cgggucgggaguuagcucaagcggguuacU..... | 1    | 1 | s03 |
| .....gggucgggaguuagcucaag.....           | 3    | 0 | s03 |
| .....gggGcgggaguuagcucaagc.....          | 1    | 1 | s03 |
| .....gggucgggaguuagcucaagc.....          | 5    | 0 | s03 |
| .....gggucgggaguuagcucaagc.....          | 3    | 0 | s03 |
| .....gggucgggaguuagcucaagcA.....         | 1    | 1 | s03 |
| .....Cggucgggaguuagcucaagcgg.....        | 3    | 1 | s03 |
| .....gggucgggaguuagcucaagcgg.....        | 72   | 0 | s03 |
| .....gggucgggaguuagcucaagcgg.....        | 1    | 1 | s03 |
| .....gggGcgggaguuagcucaagcgg.....        | 3    | 1 | s03 |
| .....gggucgggaguuagcucaagcgg.....        | 1    | 1 | s03 |
| .....gggucgggaguuAfcucaagcgg.....        | 1    | 1 | s03 |
| .....gggAcgggaguuagcucaagcgggu.....      | 1    | 1 | s03 |
| .....gCgucgggaguuagcucaagcgggu.....      | 1    | 1 | s03 |

cuaccgggucgggaguuagcucaagcgguuaccuccuacugcggacuucuaucuguccaucucugucgggguuucgagaccgcgggugcuuacugaccuuuuuag

|                                          |     |   |     |
|------------------------------------------|-----|---|-----|
| .....ggguAaggaguuagcucaagcgggu.....      | 2   | 1 | s03 |
| .....Uggucgggaguuagcucaagcgggu.....      | 1   | 1 | s03 |
| .....gggCcgaguuagcucaagcgggu.....        | 5   | 1 | s03 |
| .....gggucgggaguuagcucaagcgggu.....      | 1   | 1 | s03 |
| .....gggucgggaguuagcGcaagcgggu.....      | 2   | 1 | s03 |
| .....gggucgggaguuagcuAaagcgggu.....      | 1   | 1 | s03 |
| .....gggucgggaguuagcucaagAagggu.....     | 2   | 1 | s03 |
| .....gggucgggaguuagcucGagcgggu.....      | 1   | 1 | s03 |
| .....gggGcgggaguuagcucaagcgggu.....      | 36  | 1 | s03 |
| .....gggucgggaguuagcCcaagcgggu.....      | 1   | 1 | s03 |
| .....gggucgggaguuagcucaagcggG.....       | 1   | 1 | s03 |
| .....gggucgggagGagcucaagcgggu.....       | 2   | 1 | s03 |
| .....gggucgggaguuagcucaAacgggu.....      | 2   | 1 | s03 |
| .....gggucgggaguuagcucaagcggC.....       | 1   | 1 | s03 |
| .....gggucgggagAaagcucaagcgggu.....      | 1   | 1 | s03 |
| .....gggucgggaguuagcucaagcggA.....       | 6   | 1 | s03 |
| .....gggucgggagGuaagcucaagcgggu.....     | 4   | 1 | s03 |
| .....gggucgggaguuAaCcucaagcgggu.....     | 1   | 1 | s03 |
| .....gggucgggaguuagcucaagcgggu.....      | 597 | 0 | s03 |
| .....Cggucgggaguuagcucaagcgggu.....      | 10  | 1 | s03 |
| .....gggucgggagCuagcucaagcgggu.....      | 2   | 1 | s03 |
| .....gggucgggaguuagcucaagcgggu.....      | 1   | 1 | s03 |
| .....ggUucgggaguuagcucaagcgggu.....      | 1   | 1 | s03 |
| .....gggucggGuuagcucaagcgggu.....        | 1   | 1 | s03 |
| .....ggguAaggaguuagcucaagcgggu.....      | 1   | 1 | s03 |
| .....gggucgggaguuagAuaagcgggu.....       | 2   | 1 | s03 |
| .....gggucCgaguuagcucaagcgggu.....       | 1   | 1 | s03 |
| .....gggucgggaguuagGuaagcgggu.....       | 1   | 1 | s03 |
| .....gggucgggaguuagcucaagcggCu.....      | 3   | 1 | s03 |
| .....Cggucgggaguuagcucaagcgggu.....      | 3   | 1 | s03 |
| .....gggucgggaguuagcuUaagcgggu.....      | 1   | 1 | s03 |
| .....gggucgggaguuagcucaagcggguA.....     | 24  | 1 | s03 |
| .....gggucgggaguuagcucaagUgggu.....      | 1   | 1 | s03 |
| .....gggCcgaguuagcucaagcgggu.....        | 2   | 1 | s03 |
| .....gggucgggaguuagcucaagcggGu.....      | 2   | 1 | s03 |
| .....gggucgggaguuagcucaagcggA.....       | 1   | 1 | s03 |
| .....gggucgggagGagcucaagcgggu.....       | 3   | 1 | s03 |
| .....gggGcgggaguuagcucaagcgggu.....      | 14  | 1 | s03 |
| .....gggucgggagGuaagcucaagcgggu.....     | 3   | 1 | s03 |
| .....gggucgggaguuagcucaagcggguC.....     | 2   | 1 | s03 |
| .....gggucgggaguuagcucaagcgggu.....      | 220 | 0 | s03 |
| .....gggAcgggaguuagcucaagcgggu.....      | 1   | 1 | s03 |
| .....gggucgggaguuagcucaagcggguG.....     | 1   | 1 | s03 |
| .....gggucgggaguuagcucaagcggguU.....     | 183 | 1 | s03 |
| .....gggucgggaguuagcucaagcgggu.....      | 1   | 1 | s03 |
| .....gggGcgggaguuagcucaagcgggu.....      | 2   | 1 | s03 |
| .....gggucgggaguuagcucaagcgggu.....      | 23  | 0 | s03 |
| .....gggucgggaguuagcucaagcggguAa.....    | 8   | 1 | s03 |
| .....gggucgggaguuagcucaagcggguaac.....   | 7   | 0 | s03 |
| .....gggucgggaguuagcucaagcggguauU.....   | 1   | 1 | s03 |
| .....gggucgggaguuagcucaagcggguuacc.....  | 5   | 0 | s03 |
| .....gggGcgggaguuagcucaagcggguuacc.....  | 1   | 1 | s03 |
| .....gggucgggaguuagcucaagcggguuaccu..... | 1   | 0 | s03 |
| .....Cgucgggaguuagcucaagcggg.....        | 1   | 1 | s03 |
| .....Cgucgggaguuagcucaagcgggu.....       | 2   | 1 | s03 |
| .....Cgucgggaguuagcucaagcgggu.....       | 1   | 1 | s03 |
| .....ucgggaguuagcucaagcggguuacc.....     | 1   | 0 | s03 |
| .....cgggaguuagcucaagcggguuU.....        | 1   | 1 | s03 |
| .....ggaguuagcucaagcgggu.....            | 3   | 0 | s03 |
| .....ggaguuagcucaagcgggu.....            | 1   | 0 | s03 |
| .....uaccuccuacugcggacu.....             | 1   | 0 | s03 |
| .....uaccuccuacugcggacu.....             | 5   | 0 | s03 |
| .....uaccuccuacugcggacu.....             | 8   | 0 | s03 |
| .....uaccuccuacugcggacu.....             | 1   | 0 | s03 |
| .....uaccuccuacugcggacu.....             | 1   | 0 | s03 |
| .....accuccuacugcggacu.....              | 1   | 0 | s03 |
| .....cucugucggggucgagaccU.....           | 1   | 1 | s03 |
| .....cugucggggucgagacc.....              | 2   | 0 | s03 |
| .....cgcgggugcuuacugacc.....             | 3   | 0 | s03 |

cuaccggggucggaguuagcucaagcgguuaccuccuacugcgggacuuucuaucuguccaucugugcgggguuucgagaccgcggggucuuacugaccuuuuuug

|                                          |     |   |     |
|------------------------------------------|-----|---|-----|
| .....cgcggggucuuacugaccG.....            | 2   | 1 | s03 |
| .....cgcggggucuuacugaccu.....            | 1   | 0 | s03 |
| .....cgcggggucuuacugaccuC.....           | 3   | 1 | s03 |
| .....cgcggggucGuaacugaccuu.....          | 1   | 1 | s03 |
| .....cgcggggucuuacugaccCu.....           | 1   | 1 | s03 |
| .....cgcgggGcuuacugaccuu.....            | 1   | 1 | s03 |
| .....cgcggggucuuacugaUccuu.....          | 1   | 1 | s03 |
| .....cgcggggucGacugaccuu.....            | 3   | 1 | s03 |
| .....cgcggggucuuacugaccuG.....           | 2   | 1 | s03 |
| .....cgcgggGcuuacugaccuu.....            | 3   | 1 | s03 |
| .....cgcggggucuuacugaccuA.....           | 1   | 1 | s03 |
| .....cgcggggucuuacugaccuu.....           | 141 | 0 | s03 |
| .....cgcggggucuuacugaccG.....            | 3   | 1 | s03 |
| .....cgcggggucuuacuUaccuuu.....          | 1   | 1 | s03 |
| .....cgcggggucuuacugaccuuu.....          | 170 | 0 | s03 |
| .....cgcggggucuuacugaccuuA.....          | 1   | 1 | s03 |
| .....cgcggggucuuacugaccuAu.....          | 1   | 1 | s03 |
| .....cgcggggucuuacugaAaccuu.....         | 1   | 1 | s03 |
| .....cgcggggucuuacugaccAuu.....          | 1   | 1 | s03 |
| .....cgcggggucuuacugaccCuu.....          | 1   | 1 | s03 |
| .....cgcggggucuuacugaccuCu.....          | 1   | 1 | s03 |
| .....cgcggggucuuUugaccuuu.....           | 1   | 1 | s03 |
| .....cgcgggGcuuacugaccuuu.....           | 4   | 1 | s03 |
| .....cgcggggucGacugaccuuu.....           | 1   | 1 | s03 |
| .....cgcggggucuuacugaccGuu.....          | 2   | 1 | s03 |
| .....cgcggggucuuGcugaccuuu.....          | 1   | 1 | s03 |
| .....cgcggggucuuacugaccuuuA.....         | 5   | 1 | s03 |
| .....cgcggggucuuacugaccuuuu.....         | 16  | 0 | s03 |
| .....cgcggggucuuacugaccGuuu.....         | 1   | 1 | s03 |
| .....cgcggggucuuacugaccuuuuU.....        | 2   | 1 | s03 |
| .....cgcggggucuuacugaccuuu.....          | 1   | 0 | s03 |
| .....cgCgugcuuacugaccuuu.....            | 1   | 1 | s03 |
| ..accgggucggaguuagcuc.....               | 4   | 0 | H52 |
| ..accgggucggaguuagcucaagcgg.....         | 1   | 0 | H52 |
| ..accgggucggaguuagcucaagcgguu.....       | 1   | 0 | H52 |
| ..accgggucggaguuagcucaagcgguaaccucc..... | 1   | 0 | H52 |
| ..ccgggucggaguuagcucaagcgg.....          | 1   | 0 | H52 |
| ..ccgggucggaguuagcucaagcgguu.....        | 1   | 0 | H52 |
| ..cggggucggaguuagcucaag.....             | 2   | 0 | H52 |
| ..ccgggucggaguuagcucaagU.....            | 2   | 1 | H52 |
| ..ccgggucggaguuagcucaagcgg.....          | 5   | 0 | H52 |
| ..ccgggucggaguuagcucaagcgg.....          | 18  | 0 | H52 |
| ..ccgggucggaguuagcucaagcggA.....         | 1   | 1 | H52 |
| ..ccgggucggaguuagcucaagcgg.....          | 21  | 0 | H52 |
| ..ccgggucggaguuagcucaagcggua.....        | 1   | 1 | H52 |
| ..ccgggucggaguuagcucaagcgguu.....        | 6   | 0 | H52 |
| ..cggggucggaguuagcuca.....               | 5   | 0 | H52 |
| ..cggggucggaguuagcucaa.....              | 4   | 0 | H52 |
| ..cggggucggaguuagcucaaA.....             | 2   | 1 | H52 |
| ..cggggucggaguuagcucaag.....             | 21  | 0 | H52 |
| ..cggggucUgaguuagcucaag.....             | 1   | 1 | H52 |
| ..cggggucggaguuagcucaagc.....            | 47  | 0 | H52 |
| ..cgggAucggaguuagcucaagc.....            | 1   | 1 | H52 |
| ..cggggucggaguuagcucaaAacg.....          | 1   | 1 | H52 |
| ..cggggucggaguuagcucaagcgg.....          | 97  | 0 | H52 |
| ..cggggucggaguuagcucaagcA.....           | 2   | 1 | H52 |
| ..cggggucggaguuagcucaagUg.....           | 2   | 1 | H52 |
| ..cUgggucggaguuagcucaagcgg.....          | 1   | 1 | H52 |
| ..cggggucUgaguuagcucaagcgg.....          | 1   | 1 | H52 |
| ..Ggggucggaguuagcucaagcgg.....           | 2   | 1 | H52 |
| ..cggggucggagucCagcucaagcgg.....         | 1   | 1 | H52 |
| ..cggggucggCguuagcucaagcgg.....          | 1   | 1 | H52 |
| ..cggggucggaguuacCucaagcgg.....          | 1   | 1 | H52 |
| ..cggggucggaguuagGuaagcgg.....           | 4   | 1 | H52 |
| ..cggggucggaguuagcucaagAag.....          | 2   | 1 | H52 |
| ..cgggAucggaguuagcucaagcgg.....          | 2   | 1 | H52 |
| ..cggggucggaguuagcucaaUcgg.....          | 1   | 1 | H52 |
| ..cggggucggaguuagcucaagcggU.....         | 3   | 1 | H52 |



cuaccgggucgggaguuagcucaagcgguuaccuccuacugcgggacuuucuaucuguccaucucugugcgggguuucgagaccgcgggugcuuacugaccuuuuuag

|                                       |      |   |     |
|---------------------------------------|------|---|-----|
| .....cgggucgggaguuagcuAaagcgg.....    | 1    | 1 | H52 |
| .....cgggucgggaguuagcucaagcUg.....    | 2    | 1 | H52 |
| .....cgggucgggaguuagcuUaagcgg.....    | 1    | 1 | H52 |
| .....cAggucgggaguuagcucaagcgg.....    | 1    | 1 | H52 |
| .....cgggucgggaguuagcucaagcgg.....    | 697  | 0 | H52 |
| .....cgggucgggaguuagcCcaagcgg.....    | 1    | 1 | H52 |
| .....cgggucgggaguuagcucCagcgg.....    | 5    | 1 | H52 |
| .....cgggGcgggaguuagcucaagcgg.....    | 1    | 1 | H52 |
| .....cgAgucgggaguuagcucaagcgg.....    | 2    | 1 | H52 |
| .....cgggucgggaguuagcucaagcG.....     | 16   | 1 | H52 |
| .....cgggucgggaguuagcucaaaAcggu.....  | 3    | 1 | H52 |
| .....cgggucgggaguuagcucaagAggu.....   | 5    | 1 | H52 |
| .....cgggucgggaguuagcuAaagcgggu.....  | 5    | 1 | H52 |
| .....cgggucgggaguuagcucaagcG.....     | 1    | 1 | H52 |
| .....cgggucgggaguuagcucaagcG.....     | 8    | 1 | H52 |
| .....cgggucgggaguuagcucaagcgggu.....  | 1    | 1 | H52 |
| .....cgggucAgaguuagcucaagcgggu.....   | 2    | 1 | H52 |
| .....cgggucgggaguuUgcuaagcgggu.....   | 2    | 1 | H52 |
| .....cGgucgggaguuagcucaagcgggu.....   | 1    | 1 | H52 |
| .....cgggucUgaguuagcucaagcgggu.....   | 1    | 1 | H52 |
| .....cgggucgggaguuagcucaagcggC.....   | 1    | 1 | H52 |
| .....cgAgucgggaguuagcucaagcgggu.....  | 1    | 1 | H52 |
| .....cgggucgggaguuagcucaCgcgggu.....  | 2    | 1 | H52 |
| .....cgggucgggaguuagUucaagcgggu.....  | 4    | 1 | H52 |
| .....cgggCcgaguuagcucaagcgggu.....    | 1    | 1 | H52 |
| .....cgggucgggaguuagcucaagcG.....     | 1    | 1 | H52 |
| .....cgggucgggaguuUgcuaagcgggu.....   | 1    | 1 | H52 |
| .....cgggucgggaguuagcucaagcUg.....    | 5    | 1 | H52 |
| .....cgggucgggaguuagcucCagcgggu.....  | 3    | 1 | H52 |
| .....cgggucgggaguuagcucGagcgggu.....  | 1    | 1 | H52 |
| .....cgggucgggaguuagcuGaaagcgggu..... | 1    | 1 | H52 |
| .....cgggucgggaguuagcucaagcggA.....   | 27   | 1 | H52 |
| .....cggguAagaguuagcucaagcgggu.....   | 2    | 1 | H52 |
| .....cgggGcgggaguuagcucaagcgggu.....  | 2    | 1 | H52 |
| .....cgggucgggaguuagcAcaagcgggu.....  | 2    | 1 | H52 |
| .....cgggucGAguuagcucaagcgggu.....    | 2    | 1 | H52 |
| .....Ggggucgggaguuagcucaagcgggu.....  | 1    | 1 | H52 |
| .....cgggucgggaguuagcucaagcG.....     | 4    | 1 | H52 |
| .....cgggucgggAuuagcucaagcgggu.....   | 3    | 1 | H52 |
| .....cgggucgggaguuAaCcucaagcgggu..... | 1    | 1 | H52 |
| .....cgggucgggaguuagcucaagcgggu.....  | 1595 | 0 | H52 |
| .....cgggucgggaguuagcuUaagcgggu.....  | 2    | 1 | H52 |
| .....cUggucgggaguuagcucaagcgggu.....  | 1    | 1 | H52 |
| .....cggguUgggaguuagcucaagcgggu.....  | 1    | 1 | H52 |
| .....cgggucgggaguuagcucaagcggG.....   | 1    | 1 | H52 |
| .....cgggucgggaguuagcucUagcgggu.....  | 1    | 1 | H52 |
| .....cgAgucgggaguuagcucaagcgggu.....  | 1    | 1 | H52 |
| .....cgggucgggaguuagcucaagcggA.....   | 1    | 1 | H52 |
| .....cgggucgggaguuagcucaaaUcgggu..... | 1    | 1 | H52 |
| .....cgggucgggaguuagcucaagcggG.....   | 11   | 1 | H52 |
| .....cgggucgggaguuagcucaagcgggu.....  | 252  | 0 | H52 |
| .....cgggucgggaguuagcucaCgcgggu.....  | 2    | 1 | H52 |
| .....cgggucgggaguuagcucaagcgggu.....  | 99   | 1 | H52 |
| .....cgggucgggaguuagcucaagcgggu.....  | 1    | 1 | H52 |
| .....cgggucgggaguuagcucaagcggG.....   | 1    | 1 | H52 |
| .....cgggucgggaguuagcucaUgcgggu.....  | 2    | 1 | H52 |
| .....cgggucUgaguuagcucaagcgggu.....   | 1    | 1 | H52 |
| .....cgggucgggaguuagcucaagcA.....     | 1    | 1 | H52 |
| .....Ggggucgggaguuagcucaagcgggu.....  | 3    | 1 | H52 |
| .....cgggGcgggaguuagcucaagcgggu.....  | 2    | 1 | H52 |
| .....cgggucgggaguuagcuGaaagcgggu..... | 1    | 1 | H52 |
| .....Agggucgggaguuagcucaagcgggu.....  | 1    | 1 | H52 |
| .....Ugggucgggaguuagcucaagcgggu.....  | 1    | 1 | H52 |
| .....cgggucGAguuagcucaagcgggu.....    | 1    | 1 | H52 |
| .....cgggucgggaguuagcucaagcgggu.....  | 59   | 1 | H52 |
| .....cgggucgggaguuagcucaagcgggu.....  | 1    | 1 | H52 |
| .....cgggucgggaguuagcucaagcgggu.....  | 105  | 1 | H52 |
| .....cgggucgggaguuagcucaagcgggu.....  | 16   | 0 | H52 |
| .....cgggucgggaguuagcucaagcgggu.....  | 5    | 1 | H52 |

cuaccgggucggaguuagcucaagcgguuuaccuccuacugcggacuuucuaucuguccaucucugucgggguuucgagaccgcggggucuuacugaccuuuuuag

|                                           |     |   |     |
|-------------------------------------------|-----|---|-----|
| .....cgggucggaguuagcucaagcgguuacc.....    | 1   | 0 | H52 |
| .....gggucggaguuagcucaa.....              | 3   | 0 | H52 |
| .....gggucggaguuagcucaag.....             | 4   | 0 | H52 |
| .....gggucggaguuagcucaagc.....            | 2   | 0 | H52 |
| .....gggucggaguuagcucCagcgg.....          | 1   | 1 | H52 |
| .....gggucggaguuagcucaagcgg.....          | 28  | 0 | H52 |
| .....gggucgggAuuagcucaagcgg.....          | 1   | 1 | H52 |
| .....gggucggaguuagcucaagcGA.....          | 2   | 1 | H52 |
| .....gggucggaguuagcucaagcGU.....          | 1   | 1 | H52 |
| .....gggucggaguuagcucaagcgg.....          | 116 | 0 | H52 |
| .....gggucggaguuagcucCagcgg.....          | 2   | 1 | H52 |
| .....Cggucggaguuagcucaagcgg.....          | 1   | 1 | H52 |
| .....gggucggaguuagcucaagcggA.....         | 2   | 1 | H52 |
| .....gggucggaguuagcucaagcGU.....          | 2   | 1 | H52 |
| .....gggucggaguuagcucaagcggA.....         | 11  | 1 | H52 |
| .....gggucggaguuagAuaagcgguu.....         | 1   | 1 | H52 |
| .....gggucggaguuagcucaagcAGuu.....        | 1   | 1 | H52 |
| .....gggucggcGuuagcucaagcgguu.....        | 1   | 1 | H52 |
| .....gggucggaguuagcucaagcGU.....          | 2   | 1 | H52 |
| .....gggucggaguuagcucaagcgguu.....        | 66  | 0 | H52 |
| .....gggucggaguuagcucaagcggA.....         | 4   | 1 | H52 |
| .....gggucggaguuagcucaagcgguu.....        | 5   | 0 | H52 |
| .....gggucggaguuagcucaagcgguuU.....       | 35  | 1 | H52 |
| .....gggucggaguuagcucaagcgguuacc.....     | 2   | 0 | H52 |
| .....gggucggaguuagcucaagcgguuaccucc.....  | 4   | 0 | H52 |
| .....gggucggaguuagcucaagcgguuaccuccu..... | 2   | 0 | H52 |
| .....ggucggaguuagcucaagc.....             | 2   | 0 | H52 |
| .....ggucggaguuagcucaagcgg.....           | 3   | 0 | H52 |
| .....ucggaguuagcucaagcgg.....             | 2   | 0 | H52 |
| .....uuaccuccuacugcggga.....              | 1   | 0 | H52 |
| .....uaccuccuacugcggac.....               | 1   | 0 | H52 |
| .....uaccuccuacugcggacu.....              | 2   | 0 | H52 |
| .....uaccuccuacugcggacuuu.....            | 2   | 0 | H52 |
| .....uaccuccuacugcggacuuuu.....           | 1   | 0 | H52 |
| .....uaccuccuacugcggacuuuu.....           | 2   | 0 | H52 |
| .....uaccuccuacugcggacuuuu.....           | 2   | 0 | H52 |
| .....ucaugcggacuuuuacucuguc.....          | 1   | 0 | H52 |
| .....cuuuuacucuguccaucuc.....             | 1   | 0 | H52 |
| .....ucugucggggucgaga.....                | 2   | 0 | H52 |
| .....cugucggggucgagac.....                | 1   | 0 | H52 |
| .....ggggucgagaccgcgggucuuacugacA.....    | 1   | 1 | H52 |
| .....cgagaccgcgggucuuacuga.....           | 1   | 0 | H52 |
| .....cgagaccgcgggucuuacugaccCuu.....      | 1   | 1 | H52 |
| .....cgagaccgcgggucuuacugaccuuuu.....     | 1   | 0 | H52 |
| .....gagaccgcgggucuuacu.....              | 1   | 0 | H52 |
| .....accgcgggucuuacugaccuuuu.....         | 4   | 0 | H52 |
| .....accgcgggucuuacugaccuuuuau.....       | 1   | 0 | H52 |
| .....cgcggggucuuacugacA.....              | 1   | 1 | H52 |
| .....cgcggggucuuacugacc.....              | 12  | 0 | H52 |
| .....cgcggggucuuacugacc.....              | 6   | 0 | H52 |
| .....cgcggggucuuacugaccU.....             | 1   | 1 | H52 |
| .....cgcggggucuuacugaccA.....             | 2   | 1 | H52 |
| .....cgcggggucuuacugaccu.....             | 12  | 0 | H52 |
| .....cgcggAugcuuacugaccuu.....            | 1   | 1 | H52 |
| .....cgcggggucuuacugaccuu.....            | 28  | 0 | H52 |
| .....cgcggggucuuacugaccUuu.....           | 1   | 1 | H52 |
| .....cgcggggucuuacugaccuuC.....           | 6   | 1 | H52 |
| .....cgcggggUuuacugaccuuu.....            | 1   | 1 | H52 |
| .....cgcggggucuuacugaccuCu.....           | 2   | 1 | H52 |
| .....cgcggggucuuacugaccuuu.....           | 4   | 1 | H52 |
| .....cgcggggucuuacugaccuuA.....           | 2   | 1 | H52 |
| .....cgcggggucuuacugaccuuA.....           | 12  | 1 | H52 |
| .....cgcggggucuuacugaccuGu.....           | 3   | 1 | H52 |
| .....cgcggggucuuacugaccuuu.....           | 274 | 0 | H52 |
| .....cgcggggucuuacCgaccuuu.....           | 1   | 1 | H52 |
| .....cgcggggucuuacAaccuuu.....            | 1   | 1 | H52 |
| .....cgcggAugcuuacugaccuuu.....           | 1   | 1 | H52 |
| .....cgcggggucuuacugaccCuu.....           | 1   | 1 | H52 |
| .....cgcggggucuuacugaccAcuuu.....         | 3   | 1 | H52 |

cuaccgggucggaguuagcucaagcgguuaccuccuacugcgggacuuucuaucuguccaucucugucgggguuucgagacccgcgggugcuuacugaccuuuuuug

|                                    |    |   |     |
|------------------------------------|----|---|-----|
| .....cgcgggugcuuacugaccUuuu...     | 1  | 1 | H52 |
| .....cgcgggugcuuacugaccCuuu...     | 2  | 1 | H52 |
| .....cgcgggugcuuacugaccuuuA...     | 1  | 1 | H52 |
| .....cgcgggugcuuacugaccuuuu...     | 15 | 0 | H52 |
| .....cgcgggugcuuacugaccuAu...      | 2  | 1 | H52 |
| .....cgcgggugcuuacugaccuuAu...     | 4  | 1 | H52 |
| .....cgcgggugcuuacugaccuuuuU...    | 2  | 1 | H52 |
| .....cgcgggugcuuacugaccuuC...      | 1  | 1 | H52 |
| .....cgcgggugcuuacugaccuuC...      | 2  | 1 | H52 |
| .....cgcgggugcuuacugaccuuuu...     | 3  | 0 | H52 |
| .....cgcgggugcuuacugaccuuuu...     | 1  | 1 | H52 |
| .....cgcgggugcuuacugaccuuuu...     | 1  | 0 | H52 |
| .....ccgggucggaguuagUucaagcgg...   | 1  | 1 | j22 |
| .....cgggucggaguuagcucaagcgg...    | 1  | 0 | j22 |
| .....cgggucggaguuagcucaagcggC...   | 1  | 1 | j22 |
| .....cgggucggaguuagcucaagcgggu...  | 6  | 0 | j22 |
| .....cgggucggaguuagcucaagcgggu...  | 2  | 0 | j22 |
| .....gggucggaguuagcucaagcgggu...   | 1  | 0 | j22 |
| .....gggucggaguuagcucaagcgggu...   | 1  | 0 | j22 |
| .....Ugguucgagacccgcggggu...       | 2  | 1 | j22 |
| .....cgcgggugcuuacugaccuu...       | 1  | 0 | j22 |
| .....cgcgggugcuuacugaccuu...       | 1  | 0 | j22 |
| .....accgggucggaguuagcuca...       | 1  | 0 | k09 |
| .....cgggucggaguuagcucaagcgg...    | 1  | 0 | k09 |
| .....cgggucggaguuagcucaagcggG...   | 1  | 1 | k09 |
| .....cgggucggaguuagcucaagcgg...    | 5  | 0 | k09 |
| .....cgggucggaguuagcucaagcgggu...  | 7  | 0 | k09 |
| .....cgUgucggaguuagcucaagcgggu...  | 1  | 1 | k09 |
| .....Ggggucggaguuagcucaagcgggu...  | 1  | 1 | k09 |
| .....cgggucggaguuagcucaagcggG...   | 1  | 1 | k09 |
| .....gggucggaguuagcucaagcgg...     | 1  | 0 | k09 |
| .....gggucggaguuagcucaagcgg...     | 4  | 0 | k09 |
| .....gggucggaguuagcucaagcgggu...   | 12 | 0 | k09 |
| .....gggucggaguuagcucaagcggG...    | 1  | 1 | k09 |
| .....gggucggaguuagcucaagcgggu...   | 11 | 0 | k09 |
| .....gggucggaguuagcucaagcggguA...  | 1  | 1 | k09 |
| .....Aggucggaguuagcucaagcgggu...   | 1  | 1 | k09 |
| .....gggGcggaguuagcucaagcgggu...   | 1  | 1 | k09 |
| .....gggucggaguuagcucaagcgguuu...  | 2  | 0 | k09 |
| .....guccaucucugucgggguuucg...     | 1  | 0 | k09 |
| .....cugucgggguuucgagac...         | 1  | 0 | k09 |
| .....agaaccgcgggugcuuacugaccUuu... | 1  | 1 | k09 |
| .....accgcgggGgcuuacugaccuuuu...   | 2  | 1 | k09 |
| .....cgcgggugcuuacugaccuu...       | 6  | 0 | k09 |
| .....cgcgggugcuuacugaccuuuu...     | 4  | 0 | k09 |
| .....cgcgggugcuuacugaccuuuuU...    | 1  | 1 | k09 |
| .....ggugcuuacugaccuuuu...         | 2  | 0 | k09 |
| .....accgggucggaguuagcucaag...     | 1  | 0 | B14 |
| .....accgggucggaguuagcucaagc...    | 1  | 0 | B14 |
| .....accgggucggaguuagcucaagU...    | 1  | 1 | B14 |
| .....accgggucggaguuagcucaaUc...    | 1  | 1 | B14 |
| .....cccgggucggaguuagcucaagc...    | 1  | 0 | B14 |
| .....cccgggucggaguuagcucaagcG...   | 1  | 0 | B14 |
| .....cgggucggaguuagcuc...          | 2  | 0 | B14 |
| .....ccgggucggaguuagcucaaA...      | 2  | 1 | B14 |
| .....cgggucggaguuagcucaag...       | 1  | 0 | B14 |
| .....ccgggucggaguuagcucaagc...     | 2  | 0 | B14 |
| .....cgggucggaguuagcucaagcU...     | 1  | 1 | B14 |
| .....ccgggucggaguuagcucaagcG...    | 3  | 0 | B14 |
| .....ccgggucggaguuUcucaagcG...     | 1  | 1 | B14 |
| .....cgggucggaguuagcucaagcG...     | 2  | 1 | B14 |
| .....ccgggucggaguuagcucaagAgg...   | 1  | 1 | B14 |
| .....cgggucggaguuagcucaagcgg...    | 9  | 0 | B14 |
| .....ccgggucggaguuagcucaagcG...    | 6  | 1 | B14 |
| .....cgggucggaguuagcucaagcG...     | 1  | 1 | B14 |
| .....ccgggucggaguuagcucaagcgg...   | 5  | 0 | B14 |

cuaccgggucggaguuagcucaagcgguuuaccuccuacugcgggacuuucuaucuguccaucucugugcgggguuucgagaccgcggggugcuuacugaccuuuuuag

|                                    |     |   |     |
|------------------------------------|-----|---|-----|
| ...ccgggucggaguuagcucaagcggua..... | 1   | 1 | B14 |
| ...ccgggucggaguuagcucaagcggua..... | 1   | 1 | B14 |
| ...ccgggucggaguuagcucaagcggua..... | 1   | 1 | B14 |
| ...cgggucggaguuagcuca.....         | 2   | 0 | B14 |
| ...cgggucggaguuagcucaa.....        | 3   | 0 | B14 |
| ...cgggucggaguuagcucaG.....        | 1   | 1 | B14 |
| ...cgggucggaguuagcucaag.....       | 43  | 0 | B14 |
| ...cgggucggaaUuuagcucaag.....      | 1   | 1 | B14 |
| ...cgggucggaaUuuagcucaag.....      | 1   | 1 | B14 |
| ...cggguUggaguuagcucaagc.....      | 1   | 1 | B14 |
| ...cgggucggaguuagcucaagc.....      | 76  | 0 | B14 |
| ...cgggucggagUGagcucaagc.....      | 1   | 1 | B14 |
| ...cgggucggaguuagcucaagU.....      | 1   | 1 | B14 |
| ...cgggucggaguuagcucaagA.....      | 2   | 1 | B14 |
| ...cgggucggaguuagcucaagcA.....     | 3   | 1 | B14 |
| ...cgggGcggaguuagcucaagcg.....     | 1   | 1 | B14 |
| ...cgggucggagUGagcucaagcg.....     | 1   | 1 | B14 |
| ...cgggucggaguuagcucaagcg.....     | 166 | 0 | B14 |
| ...cgggucggaguuagcucaagcU.....     | 5   | 1 | B14 |
| ...cgggucggaguuagcucaagAg.....     | 2   | 1 | B14 |
| ...cgggucggagCUagcucaagcg.....     | 1   | 1 | B14 |
| ...cgggucggaguuUcuaagcg.....       | 1   | 1 | B14 |
| ...cGAgucggaguuagcucaagcgg.....    | 2   | 1 | B14 |
| ...cgggucggaguuagcucUagcgg.....    | 1   | 1 | B14 |
| ...cgggucggGguuagcucaagcgg.....    | 1   | 1 | B14 |
| ...cgggucgUaguuagcucaagcgg.....    | 1   | 1 | B14 |
| ...cgggucggaguuACcucaagcgg.....    | 2   | 1 | B14 |
| ...cgggucggagUCagcucaagcgg.....    | 1   | 1 | B14 |
| ...cgggucggaguuagcucaagcAg.....    | 1   | 1 | B14 |
| ...cgggucggaguuagcucaagcgg.....    | 584 | 0 | B14 |
| ...cAggucggaguuagcucaagcgg.....    | 1   | 1 | B14 |
| ...cgggucggaguuagcucaagcG.....     | 38  | 1 | B14 |
| ...cgggucggaguuagcuUaagcgg.....    | 1   | 1 | B14 |
| ...cgggucggaguuagcucaaUcgg.....    | 3   | 1 | B14 |
| ...cgggucggaguuagcucaagAgg.....    | 7   | 1 | B14 |
| ...cgggucggaguuagcucaagcUg.....    | 4   | 1 | B14 |
| ...cggAucggaguuagcucaagcgg.....    | 1   | 1 | B14 |
| ...cgggucggaguuagUuaagcgg.....     | 1   | 1 | B14 |
| ...cgggucggaguuagcucaagUgg.....    | 2   | 1 | B14 |
| ...cgggucggaguuagcGcaagcgg.....    | 1   | 1 | B14 |
| ...cgggucggaguuagcucaagcGc.....    | 1   | 1 | B14 |
| ...cgggucggaguuagcucaagGgg.....    | 1   | 1 | B14 |
| ...cggCucggaguuagcucaagcgg.....    | 1   | 1 | B14 |
| ...cgggucggaguuCgcuaagcgg.....     | 1   | 1 | B14 |
| ...cggguUggaguuagcucaagcgg.....    | 1   | 1 | B14 |
| ...cgggucggaguuagcucaagcGU.....    | 29  | 1 | B14 |
| ...cgggucggaguuagcucaagcGU.....    | 8   | 1 | B14 |
| ...cgggucGlaguuagcucaagcgg.....    | 1   | 1 | B14 |
| ...cgggGcggaguuagcucaagcgg.....    | 2   | 1 | B14 |
| ...cgggucggaguuagcucaagcggA.....   | 38  | 1 | B14 |
| ...cgggucggaguuagcucaagcggC.....   | 1   | 1 | B14 |
| ...cgggucggaguuagcucaagcggG.....   | 1   | 1 | B14 |
| ...cgggucggaguuagcucaagcggAu.....  | 1   | 1 | B14 |
| ...cgggucggaguuUcuaagcgg.....      | 3   | 1 | B14 |
| ...cgggucggaguuagcucCagcgg.....    | 1   | 1 | B14 |
| ...cgggucAgaguuagcucaagcgg.....    | 1   | 1 | B14 |
| ...cgggucggaguuagcucaagUgg.....    | 1   | 1 | B14 |
| ...cgggucggaguuagcucaagcgg.....    | 561 | 0 | B14 |
| ...Ggggucggaguuagcucaagcgg.....    | 2   | 1 | B14 |
| ...cgggucggaguuagcucaagAgg.....    | 4   | 1 | B14 |
| ...cgggucggaguuagAuaagcgg.....     | 1   | 1 | B14 |
| ...cgggucggaguuagcCcaagcgg.....    | 1   | 1 | B14 |
| ...cggAucggaguuagcucaagcgg.....    | 1   | 1 | B14 |
| ...cgggucCgaguuagcucaagcgg.....    | 1   | 1 | B14 |
| ...cUggucggaguuagcucaagcgg.....    | 1   | 1 | B14 |
| ...cgggucggaguuGgcuaagcgg.....     | 1   | 1 | B14 |
| ...cgggucggaguuCgcuaagcgg.....     | 1   | 1 | B14 |
| ...cgggucggaguuagcucaagcUgu.....   | 2   | 1 | B14 |
| ...cgggucggaguuagcuUaagcgg.....    | 1   | 1 | B14 |

cuaccgggucgggaguuagcucaagcgguuuaccuccuacugcgggacuuucuaucuguccaucucugucgggguuucgagaccgcggggucuuacugaccuuuuuag

|                                        |     |   |     |
|----------------------------------------|-----|---|-----|
| .....cgggucgggaguuagcuAaagcgggu.....   | 1   | 1 | B14 |
| .....cgggucgggaguuagcucaaUcgggu.....   | 1   | 1 | B14 |
| .....cggguAaggaguuagcucaagcgggu.....   | 1   | 1 | B14 |
| .....cgggucgggaguuagcucaagcgggu.....   | 129 | 0 | B14 |
| .....cgggGcgggaguuagcucaagcgggu.....   | 1   | 1 | B14 |
| .....cgggucgggaguuagcucaagcgggu.....   | 3   | 1 | B14 |
| .....cgAgucgggaguuagcucaagcgggu.....   | 2   | 1 | B14 |
| .....cgggucgggaguuagcucaagcgggu.....   | 1   | 1 | B14 |
| .....cgggucgggaguuagcucaagcgggu.....   | 25  | 1 | B14 |
| .....cgggucgggaguuagcucaagcggguC.....  | 1   | 1 | B14 |
| .....cgggucgggaguuagcucaagcggguU.....  | 96  | 1 | B14 |
| .....cgggucgggaguuagcucaagcggguu.....  | 6   | 0 | B14 |
| .....cgggucgggaguuagcucaagcggguAa..... | 20  | 1 | B14 |
| .....cgggucgggaguuagcucaagcggguuC..... | 1   | 1 | B14 |
| .....cgggucgggaguuagcucaagcggguuA..... | 2   | 1 | B14 |
| .....cgggucgggaguuagcucaagcggguuU..... | 3   | 1 | B14 |
| .....gggucgggaguuagcucaag.....         | 1   | 1 | B14 |
| .....gggucgggaguuagcucaag.....         | 2   | 0 | B14 |
| .....Cggucgggaguuagcucaagc.....        | 1   | 1 | B14 |
| .....gggucgggaguuagcucaagc.....        | 1   | 0 | B14 |
| .....gggucgggaguuagcucaagcgg.....      | 4   | 0 | B14 |
| .....Cggucgggaguuagcucaagcgg.....      | 1   | 1 | B14 |
| .....gggucgggaguuagcucaagcgg.....      | 1   | 1 | B14 |
| .....gggucgggaguuagcucaagcgg.....      | 15  | 0 | B14 |
| .....gggucgggaguuagcucaagcgggu.....    | 38  | 0 | B14 |
| .....gggucgggaguuagcucaCgcggu.....     | 1   | 1 | B14 |
| .....gggucgggaguuagcuUaagcgggu.....    | 1   | 1 | B14 |
| .....Cggucgggaguuagcucaagcgggu.....    | 1   | 1 | B14 |
| .....gggucgggaguuagcucaagcggguA.....   | 4   | 1 | B14 |
| .....gggucgggaguuagcucaagcgggu.....    | 17  | 0 | B14 |
| .....gggucgggaguuagcucaagcggguU.....   | 24  | 1 | B14 |
| .....gggucgggaguuagcucaagcggguuA.....  | 1   | 1 | B14 |
| .....ggucgggaguuagcucaagc.....         | 2   | 0 | B14 |
| .....ggucgggaguuagcucaagcggU.....      | 1   | 1 | B14 |
| .....ggucgggaguuagcucaagcgggu.....     | 1   | 0 | B14 |
| .....gaguuagcucaagcgggu.....           | 1   | 0 | B14 |
| .....uaccuccuacugcgggac.....           | 1   | 0 | B14 |
| .....agaccgcgggugcuuacugacAcu.....     | 1   | 1 | B14 |
| .....accgcgggugcuuacugaccc.....        | 1   | 0 | B14 |
| .....ccgcgggugcuuacugacccuu.....       | 1   | 0 | B14 |
| .....ccgcgggugcuuacugacccuuA.....      | 1   | 1 | B14 |
| .....cgcgggugcuuacuuUacc.....          | 1   | 1 | B14 |
| .....cgcgggugcuuacugacc.....           | 11  | 0 | B14 |
| .....cgcgggugcuuacugacA.....           | 1   | 1 | B14 |
| .....cgcgggugcuuacugaccc.....          | 4   | 0 | B14 |
| .....cgcgggugcuuacugacccu.....         | 20  | 0 | B14 |
| .....cgcgggugcuuacugacccuu.....        | 61  | 0 | B14 |
| .....cgcgggugcuuacugacccuuA.....       | 3   | 1 | B14 |
| .....cgcgggGgcuuacugacccuu.....        | 1   | 1 | B14 |
| .....cgcgggugcuuacugacccAu.....        | 1   | 1 | B14 |
| .....cgcgUgugcuuacugacccuu.....        | 1   | 1 | B14 |
| .....cgcgggugcuuAaugacccuu.....        | 1   | 1 | B14 |
| .....cgcgggugUuuacugacccuu.....        | 1   | 1 | B14 |
| .....cgcgggugcuuacugacccuuu.....       | 284 | 0 | B14 |
| .....cgcgggugcuuacugacccuuA.....       | 1   | 1 | B14 |
| .....cgcAggugcuuacugacccuuu.....       | 1   | 1 | B14 |
| .....cgUgggugcuuacugacccuuu.....       | 1   | 1 | B14 |
| .....cgcgggugcuuAaugacccuuu.....       | 1   | 1 | B14 |
| .....cgcgUgugcuuacugacccuuu.....       | 1   | 1 | B14 |
| .....cgcgggugcuuacugacccuuG.....       | 1   | 1 | B14 |
| .....cgcgggugcuuacugacccuuu.....       | 1   | 1 | B14 |
| .....cgcgggugcuuacugacUcuuu.....       | 1   | 1 | B14 |
| .....cgcgggugcuuacugacccuuA.....       | 26  | 1 | B14 |
| .....cgcgggugcuuacugacccuuC.....       | 5   | 1 | B14 |
| .....cgcgggugUuuacugacccuuu.....       | 1   | 1 | B14 |
| .....Ugcgggugcuuacugacccuuu.....       | 1   | 1 | B14 |
| .....cgcgggugcuuacugacccuuAu.....      | 1   | 1 | B14 |
| .....cgcgggugcuuacugacccuuuu.....      | 21  | 0 | B14 |
| .....cgcgggugcuuacugacccuuuuU.....     | 1   | 1 | B14 |

cuaccgggucggaguuagcucaagcgguuaccuccuacugcggacuuucuaucuguccaucucugucgggguuucgagaccgcggggucuuacugaccuuuuuag

|                                    |     |   |     |
|------------------------------------|-----|---|-----|
| .....gcgggucuuacugacc.....         | 1   | 0 | B14 |
| .....gcgggucuuacugaccuCu.....      | 1   | 1 | B14 |
| ...ccgggucggaguuagcuGaagcgg.....   | 1   | 1 | j18 |
| ...ccgggucggaguuagcucaagcgg.....   | 10  | 0 | j18 |
| ...ccgggucggaguuagcucaagcgg.....   | 13  | 0 | j18 |
| ...ccgggucggaguuagcucaagcggC.....  | 2   | 1 | j18 |
| ...ccgggucggaguuagcucaagcggAa..... | 2   | 1 | j18 |
| ...cgggucggaguuagcucaagc.....      | 3   | 0 | j18 |
| ...cgggucggaguuagcucaagc.....      | 1   | 0 | j18 |
| ...cgggCcgaguuagcucaagcgg.....     | 2   | 1 | j18 |
| ...cCggucggaguuagcucaagcgg.....    | 1   | 1 | j18 |
| ...cgggucggaguuagcuGaagcgg.....    | 1   | 1 | j18 |
| ...cggguGggaguuagcucaagcgg.....    | 1   | 1 | j18 |
| ...cggguAaggaguuagcucaagcgg.....   | 1   | 1 | j18 |
| ...cgggGcggaguuagcucaagcgg.....    | 2   | 1 | j18 |
| ...cgggucggaguuagcCaaagcgg.....    | 1   | 1 | j18 |
| ...cgggucggaguuagcucaaUcgg.....    | 1   | 1 | j18 |
| ...cgCgucggaguuagcucaagcgg.....    | 1   | 1 | j18 |
| ...Ggggucggaguuagcucaagcgg.....    | 1   | 1 | j18 |
| ...cgggucggaguuagcucCagcgg.....    | 1   | 1 | j18 |
| ...cgggucggaguuGgcucaagcgg.....    | 1   | 1 | j18 |
| ...cggguUggaguuagcucaagcgg.....    | 2   | 1 | j18 |
| ...cgggucggaguuagcucaagcgg.....    | 111 | 0 | j18 |
| ...Ugggucggaguuagcucaagcgg.....    | 4   | 1 | j18 |
| ...cgggucggaguuagcucaagcCcu.....   | 1   | 1 | j18 |
| ...cgggAcggaguuagcucaagcgg.....    | 3   | 1 | j18 |
| ...cgggCcgaguuagcucaagcgg.....     | 9   | 1 | j18 |
| ...cggguAaggaguuagcucaagcgg.....   | 1   | 1 | j18 |
| ...cgggucggagCuagcucaagcgg.....    | 1   | 1 | j18 |
| ...cggUcggaguuagcucaagcgg.....     | 1   | 1 | j18 |
| ...cgggucggaguuaglucaagcgg.....    | 2   | 1 | j18 |
| ...cgggucggaguuagcucaagcggA.....   | 2   | 1 | j18 |
| ...cgggucggagGuaagcucaagcgg.....   | 6   | 1 | j18 |
| ...cgggucggaguuagcucCagcgg.....    | 5   | 1 | j18 |
| ...cgggucggaguuagcucaagcgg.....    | 369 | 0 | j18 |
| ...Agggucggaguuagcucaagcgg.....    | 1   | 1 | j18 |
| ...cgggucggaguuagcucaagAggu.....   | 2   | 1 | j18 |
| ...cggguGggaguuagcucaagcgg.....    | 1   | 1 | j18 |
| ...cgggucggaguCagcucaagcgg.....    | 1   | 1 | j18 |
| ...Ugggucggaguuagcucaagcgg.....    | 6   | 1 | j18 |
| ...cgggGcggaguuagcucaagcgg.....    | 14  | 1 | j18 |
| ...cgggucggaguuagcucaagUggu.....   | 1   | 1 | j18 |
| ...cgggucggaguuGagcucaagcgg.....   | 1   | 1 | j18 |
| ...cgggucggaguuagcucaagcggC.....   | 5   | 1 | j18 |
| ...cgggucggaguuagcuGaagcgg.....    | 1   | 1 | j18 |
| ...cgggucggaguuagcucaagGggu.....   | 1   | 1 | j18 |
| ...cgggucggaguuAaCcucaagcgg.....   | 2   | 1 | j18 |
| ...cgggucggaguuCgcucaagcgg.....    | 2   | 1 | j18 |
| ...cgggucggaguuagcuAaagcgg.....    | 2   | 1 | j18 |
| ...cgggucggaguuagcucaagcgg.....    | 1   | 1 | j18 |
| ...cgggucggaguuagcucaaCcggu.....   | 1   | 1 | j18 |
| ...cgggucggaguuagUucaagcgg.....    | 1   | 1 | j18 |
| ...cgggucggaguuagcucaaUcgguu.....  | 1   | 1 | j18 |
| ...Agggucggaguuagcucaagcgguu.....  | 1   | 1 | j18 |
| ...cgggucggaguuagcucGagcgguu.....  | 1   | 1 | j18 |
| ...cgggucggaguuagcucaagcgguu.....  | 61  | 0 | j18 |
| ...cgggucggaguuagcucaagGggu.....   | 1   | 1 | j18 |
| ...cgggGcggaguuagcucaagcgguu.....  | 1   | 1 | j18 |
| ...cgggucggaguuagcucaCgcgguu.....  | 1   | 1 | j18 |
| ...cgggucggaguuagcucaagcggA.....   | 8   | 1 | j18 |
| ...Ugggucggaguuagcucaagcgguu.....  | 4   | 1 | j18 |
| ...cggguUggaguuagcucaagcgguu.....  | 2   | 1 | j18 |
| ...cgggucggaguuagcucaagcggAa.....  | 18  | 1 | j18 |
| ...cgggucggaguuagcucaagcgguuU..... | 14  | 1 | j18 |
| ...cgggucggaguuagcucaagcgguuA..... | 3   | 0 | j18 |
| ...gggucggaguuagcucaagcgg.....     | 9   | 0 | j18 |
| ...gggucggaguuaglucaagcgg.....     | 3   | 1 | j18 |

cuaccgggucggaguuagcucaagcgguuaccuccuacugcgggacuuucuaucuguccaucucugucgggguuucgagaccgcgggugcuuacugaccuuuuuug

|                                     |    |   |     |
|-------------------------------------|----|---|-----|
| .....gggucggaguuagcucaagcggG.....   | 3  | 1 | j18 |
| .....gggCcgaguuagcucaagcggG.....    | 2  | 1 | j18 |
| .....gggucggaguuagcucaagcggG.....   | 95 | 0 | j18 |
| .....gggucggGuuagcucaagcggG.....    | 1  | 1 | j18 |
| .....gggucggaguuagcucaagAggu.....   | 1  | 1 | j18 |
| .....gggucggaguuagcucaagcggC.....   | 2  | 1 | j18 |
| .....gggGcggaguuagcucaagcggG.....   | 2  | 1 | j18 |
| .....gggucggaguuagUucaagcggG.....   | 2  | 1 | j18 |
| .....gggucggaguuagcGcaagcgguu.....  | 1  | 1 | j18 |
| .....gggGcggaguuagcucaagcgguu.....  | 2  | 1 | j18 |
| .....gggucggaguuagcucaagcggG.....   | 1  | 1 | j18 |
| .....gggucggaguuagcucaagcGcu.....   | 1  | 1 | j18 |
| .....gggucggaguuagcucaagcgguu.....  | 1  | 1 | j18 |
| .....gggucggaguuagcucaagcggCu.....  | 1  | 1 | j18 |
| .....ggguUggaguuagcucaagcgguu.....  | 1  | 1 | j18 |
| .....gggucggaguuagcucaagcgguu.....  | 39 | 0 | j18 |
| .....gggucggaguuagcucaagcggG.....   | 6  | 1 | j18 |
| .....gggucggaguuagcucaagcgguuU..... | 10 | 1 | j18 |
| .....gggucggaguuagcucaagcgguu.....  | 2  | 0 | j18 |
| .....gCaguuaagcucaagcggG.....       | 1  | 1 | j18 |
| .....ggaguuagcucaagcggG.....        | 2  | 0 | j18 |
| .....cgcgggGgcuuacugaccuu.....      | 2  | 1 | j18 |
| .....Ugcgggugcuuacugaccuu.....      | 1  | 1 | j18 |
| .....cgcgggugcuuAagaccuu.....       | 1  | 1 | j18 |
| .....cgcgggugcuuacugaccuu.....      | 24 | 0 | j18 |
| .....cgcgggugcuuacugaccuu.....      | 12 | 0 | j18 |
| .....cgcgggugGuuacugaccuu.....      | 1  | 1 | j18 |
| .....Ugcgggugcuuacugaccuu.....      | 1  | 1 | j18 |
| .....cgcgggugcuuAagaccuu.....       | 4  | 1 | j18 |
| .....ccgggucggaguuagcucaagcgg.....  | 5  | 0 | j09 |
| .....ccgggucggaguuagcucaagcggA..... | 1  | 1 | j09 |
| .....ccgggucggaguuagcucaagcggG..... | 4  | 0 | j09 |
| .....cgggucggaguuagcucaag.....      | 2  | 0 | j09 |
| .....cgggucggaguuagcucaagc.....     | 3  | 0 | j09 |
| .....cgggucggGuuagcucaagc.....      | 1  | 1 | j09 |
| .....cgggucggaguuagcucaagUg.....    | 1  | 1 | j09 |
| .....cgggucggGuuagcucaagcG.....     | 1  | 1 | j09 |
| .....cgggucggaguuagGuaagcG.....     | 1  | 1 | j09 |
| .....cgggucggagAuaagcucaagcG.....   | 1  | 1 | j09 |
| .....cgggucggaguuagcAcaagcG.....    | 1  | 1 | j09 |
| .....cgggCcgaguuagcucaagcG.....     | 1  | 1 | j09 |
| .....cgggGcggaguuagcucaagcG.....    | 1  | 1 | j09 |
| .....cgggucggaguuagcucaagcG.....    | 32 | 0 | j09 |
| .....cgggucggAuuagcucaagcG.....     | 1  | 1 | j09 |
| .....cgggucggaguuagcucaagcU.....    | 1  | 1 | j09 |
| .....cgggucggaguuagcuUaagcG.....    | 1  | 1 | j09 |
| .....cgggucggaguuagcucaaUcg.....    | 1  | 1 | j09 |
| .....cgggucggaguuUcucaagcG.....     | 1  | 1 | j09 |
| .....UgggucggaguuagcucaagcG.....    | 1  | 1 | j09 |
| .....cAggucggaguuagcucaagcG.....    | 1  | 1 | j09 |
| .....cgggucggaguuagcuAaagcG.....    | 1  | 1 | j09 |
| .....cgggucggaguuagcucaaUcgg.....   | 3  | 1 | j09 |
| .....cgggGcggaguuagcucaagcG.....    | 11 | 1 | j09 |
| .....cgggucggaguuCgcucaagcG.....    | 1  | 1 | j09 |
| .....cgggucggCguuagcucaagcG.....    | 4  | 1 | j09 |
| .....cgggucggaUuuagcucaagcG.....    | 1  | 1 | j09 |
| .....cgggCcgaguuagcucaagcG.....     | 3  | 1 | j09 |
| .....cgggucggagCuagcucaagcG.....    | 2  | 1 | j09 |
| .....cgggucggaguuagcucaCgcgg.....   | 1  | 1 | j09 |
| .....cgggucggagGuaagcucaagcG.....   | 4  | 1 | j09 |
| .....cgggucggUuuagcucaagcG.....     | 1  | 1 | j09 |
| .....cgggucggaguuagcucaagcAg.....   | 1  | 1 | j09 |
| .....cgggucggGuuagcucaagcG.....     | 1  | 1 | j09 |
| .....cgggucgUaguuagcucaagcG.....    | 1  | 1 | j09 |
| .....cgggucggaguuagcucCagcG.....    | 4  | 1 | j09 |
| .....cgggucggaguuagcucUagcG.....    | 1  | 1 | j09 |
| .....cgggucggaguuagcucaagcG.....    | 5  | 1 | j09 |
| .....cgggucggaguuagcGcaagcG.....    | 1  | 1 | j09 |

cuaccgggucgggaguuagcucaagcgguuaccucucuaugcggacuuucuaucuguccaucucugucgggguuucgagaccgcgggugcuuacugaccuuuuuug

|                                        |     |   |     |
|----------------------------------------|-----|---|-----|
| .....cgggucgggaguuagUucaagcgg.....     | 1   | 1 | j09 |
| .....cgggucgggaguuagcucaagcgg.....     | 281 | 0 | j09 |
| .....Ugggucgggaguuagcucaagcgg.....     | 1   | 1 | j09 |
| .....cgggAcggaguuagcucaagcgg.....      | 3   | 1 | j09 |
| .....Ggggucgggaguuagcucaagcgg.....     | 2   | 1 | j09 |
| .....cgggucgggaguuagcucaagcggU.....    | 4   | 1 | j09 |
| .....cCgggucgggaguuagcucaagcgg.....    | 1   | 1 | j09 |
| .....cgggCcgaguuagcucaagcggg.....      | 8   | 1 | j09 |
| .....cgggucgggAuuagcucaagcggg.....     | 1   | 1 | j09 |
| .....cgggucgggaguuUcuaagcggg.....      | 6   | 1 | j09 |
| .....cgggucgggaguuagcucaGgcggg.....    | 1   | 1 | j09 |
| .....cgggucgggaguuagcucaCgcggg.....    | 1   | 1 | j09 |
| .....cgggucgggaguuagcucaagcggg.....    | 469 | 0 | j09 |
| .....cgggucgggaguuagcucaagcggA.....    | 10  | 1 | j09 |
| .....cggguGggaguuagcucaagcggg.....     | 1   | 1 | j09 |
| .....cgggucgggaguuCgcuaagcggg.....     | 1   | 1 | j09 |
| .....Ggggucgggaguuagcucaagcggg.....    | 2   | 1 | j09 |
| .....cgggAcggaguuagcucaagcggg.....     | 5   | 1 | j09 |
| .....cgggucgggUuuagcucaagcggg.....     | 1   | 1 | j09 |
| .....cgggucgggaguuagUucaagcggg.....    | 2   | 1 | j09 |
| .....cgggucgggaguuagcucaaUcggg.....    | 6   | 1 | j09 |
| .....cgggucgggaguuagcucaUgcggg.....    | 1   | 1 | j09 |
| .....Ugggucgggaguuagcucaagcggg.....    | 3   | 1 | j09 |
| .....cgggucgggaguuagAuaagcggg.....     | 2   | 1 | j09 |
| .....cgggucgggagCuagcucaagcggg.....    | 1   | 1 | j09 |
| .....cgggucgggaguuUgcuaagcggg.....     | 1   | 1 | j09 |
| .....cgggucgggagAuaagcucaagcggg.....   | 1   | 1 | j09 |
| .....cgggucgggaguuagcGcaagcggg.....    | 1   | 1 | j09 |
| .....cggguUggaguuagcucaagcggg.....     | 1   | 1 | j09 |
| .....cgggucgAaguuagcucaagcggg.....     | 1   | 1 | j09 |
| .....cgggucgggaguuagcucaagAaggu.....   | 2   | 1 | j09 |
| .....cgggucgggaguuagGuaagcggg.....     | 1   | 1 | j09 |
| .....cgggucgggaguuagcucaagcggG.....    | 2   | 1 | j09 |
| .....cgCgucgggaguuagcucaagcggg.....    | 1   | 1 | j09 |
| .....cgggucgggaguuagcucCagcggg.....    | 1   | 1 | j09 |
| .....cgggucgggaguuagcucaagcggU.....    | 2   | 1 | j09 |
| .....cgggucgggaguuagcucUagcggg.....    | 1   | 1 | j09 |
| .....cgggucgggagGuaagcucaagcggg.....   | 8   | 1 | j09 |
| .....cgggucgggaguuagcuAaagcggg.....    | 5   | 1 | j09 |
| .....cgggGcggaguuagcucaagcggg.....     | 15  | 1 | j09 |
| .....cgggucgggCguuagcucaagcggg.....    | 3   | 1 | j09 |
| .....cgggucgggaguuagcucaagcggCu.....   | 2   | 1 | j09 |
| .....cgggucgggaguuagcuUaagcggg.....    | 1   | 1 | j09 |
| .....cgggucgggaguuagcucaagcgggA.....   | 27  | 1 | j09 |
| .....cgggucgggaguuagcucaagUgggu.....   | 1   | 1 | j09 |
| .....cgggucgggaguuagcucaUgcgggu.....   | 1   | 1 | j09 |
| .....cgggAcggaguuagcucaagcgggu.....    | 2   | 1 | j09 |
| .....cgggucgggaguuagcucaagcggCu.....   | 1   | 1 | j09 |
| .....Ggggucgggaguuagcucaagcgggu.....   | 1   | 1 | j09 |
| .....cgggucgggaguuagcucCagcgggu.....   | 1   | 1 | j09 |
| .....cgggucgggagCuagcucaagcgggu.....   | 1   | 1 | j09 |
| .....cgggucgggaguuagcucaagcgggG.....   | 1   | 1 | j09 |
| .....cgggGcggaguuagcucaagcgggu.....    | 4   | 1 | j09 |
| .....cggUucggaguuagcucaagcgggu.....    | 1   | 1 | j09 |
| .....cgggucgggGguuagcucaagcgggu.....   | 1   | 1 | j09 |
| .....cgggucgggCguuagcucaagcgggu.....   | 1   | 1 | j09 |
| .....cgggucgggaguuagcucaagcgggA.....   | 2   | 1 | j09 |
| .....cgggucgggaguuagcucaagcgggu.....   | 68  | 0 | j09 |
| .....cgggucgggaguuagcucaagcggguU.....  | 9   | 1 | j09 |
| .....cgggucgggaguuagcucaagcgggAa.....  | 11  | 1 | j09 |
| .....cgggucgggaguuagcucaagcggguAa..... | 1   | 1 | j09 |
| .....gggucgggaguuagcucaagcggg.....     | 53  | 0 | j09 |
| .....gggucgggaguuagcuAaagcggg.....     | 1   | 1 | j09 |
| .....gggucgggaguuagAuaagcggg.....      | 1   | 1 | j09 |
| .....gggucgggCguuagcucaagcggg.....     | 1   | 1 | j09 |
| .....gggucgggaguuUcuaagcggg.....       | 1   | 1 | j09 |
| .....gggucgggagAuaagcucaagcggg.....    | 1   | 1 | j09 |
| .....gggucgggaguuagcucCagcggg.....     | 1   | 1 | j09 |
| .....gggucgggGguuagcucaagcggg.....     | 2   | 1 | j09 |



cuaccgggucgggaguuagcucaagcgguuaccuccuacugcgggacuuuauucuguccaucucugugcgggguucgagaccgcgggugcuuacugaccuuuuug

|                                       |     |   |     |
|---------------------------------------|-----|---|-----|
| .....gggucggGguuagcucaagcgggu.....    | 1   | 1 | j09 |
| .....gggucggagCuagcucaagcgggu.....    | 1   | 1 | j09 |
| .....gggucggaguuagcucaaaCcggu.....    | 1   | 1 | j09 |
| .....gggucggaguuagAuaagcgggu.....     | 3   | 1 | j09 |
| .....gggucggaguuagcucaagUggu.....     | 1   | 1 | j09 |
| .....gggucggaguuagcucaagcgggu.....    | 254 | 0 | j09 |
| .....gggucggaguuagcuAaagcgggu.....    | 1   | 1 | j09 |
| .....gggucggaguuagcucaagcggG.....     | 3   | 1 | j09 |
| .....gggucggaguuagcucaagcUgu.....     | 2   | 1 | j09 |
| .....gggucggaguuagcucaagcggA.....     | 5   | 1 | j09 |
| .....gggAacggaguuagcucaagcgggu.....   | 1   | 1 | j09 |
| .....gggucggaguuagcucaaaUcggu.....    | 3   | 1 | j09 |
| .....gggucggaguuauUcucaagcgggu.....   | 1   | 1 | j09 |
| .....ggUucggaguuagcucaagcgggu.....    | 1   | 1 | j09 |
| .....gggucggaguuagcucaCcggu.....      | 6   | 1 | j09 |
| .....ggguUggaguuagcucaagcgggu.....    | 4   | 1 | j09 |
| .....gggucggaguuagcucCagcgggu.....    | 4   | 1 | j09 |
| .....gggucggagAuaagcucaagcgggu.....   | 2   | 1 | j09 |
| .....gggGcggaguuagcucaagcgggu.....    | 9   | 1 | j09 |
| .....gCgucggaguuagcucaagcgggu.....    | 1   | 1 | j09 |
| .....gggucggagGuaagcucaagcgggu.....   | 5   | 1 | j09 |
| .....gggucggaguuagcucaagcggUu.....    | 2   | 1 | j09 |
| .....gggCcggaguuagcucaagcgggu.....    | 8   | 1 | j09 |
| .....gggucggaguuagUuaagcgggu.....     | 1   | 1 | j09 |
| .....gggucggUguuagcucaagcgggu.....    | 1   | 1 | j09 |
| .....gggucggCguuagcucaagcgggu.....    | 5   | 1 | j09 |
| .....gggucggaguuCgcucaagcgggu.....    | 1   | 1 | j09 |
| .....ggguAagaguuagcucaagcgggu.....    | 2   | 1 | j09 |
| .....Aagucggaguuagcucaagcgggu.....    | 1   | 1 | j09 |
| .....gggucggaguuagcucaUgcggu.....     | 2   | 1 | j09 |
| .....gggucggagAuaagcucaagcgggu.....   | 1   | 1 | j09 |
| .....gggucggaguuagcucaagcggguA.....   | 5   | 1 | j09 |
| .....gggucAgaguuagcucaagcgggu.....    | 1   | 1 | j09 |
| .....gggucggaguuauUcucaagcgggu.....   | 1   | 1 | j09 |
| .....gggucggCguuagcucaagcgggu.....    | 2   | 1 | j09 |
| .....Uggucggaguuagcucaagcgggu.....    | 1   | 1 | j09 |
| .....gggucggaguuagcucaagcggguG.....   | 1   | 1 | j09 |
| .....gggucggaguuagUuaagcgggu.....     | 1   | 1 | j09 |
| .....gggGcggaguuagcucaagcgggu.....    | 8   | 1 | j09 |
| .....gggucggaguuagcucaaaUcggu.....    | 1   | 1 | j09 |
| .....gggucggaguuagcucCagcgggu.....    | 3   | 1 | j09 |
| .....gggucggaguuagcucaagAggu.....     | 1   | 1 | j09 |
| .....gggucggaguuagcucaaaCcggu.....    | 1   | 1 | j09 |
| .....gggucggaguuagcuAaagcgggu.....    | 2   | 1 | j09 |
| .....gggucggagGuaagcucaagcgggu.....   | 2   | 1 | j09 |
| .....gggucggaguuagcucaagcggG.....     | 1   | 1 | j09 |
| .....gggucggaguuagcucaCcggu.....      | 1   | 1 | j09 |
| .....gggucggaguuagAuaagcgggu.....     | 1   | 1 | j09 |
| .....gggucggaguuagcucaagcggguU.....   | 11  | 1 | j09 |
| .....gggucggaguuagcucaagcggguA.....   | 1   | 1 | j09 |
| .....gggucggaguuagcucaagcgguuac.....  | 1   | 0 | j09 |
| .....gggucggaguuagcucaagcgguuacc..... | 1   | 0 | j09 |
| .....ggaguuagcucaagcgggu.....         | 1   | 0 | j09 |
| .....ggaguuagcucaagcggguA.....        | 1   | 1 | j09 |
| .....ggaguuagcucaagcggguAa.....       | 1   | 1 | j09 |
| .....uaccuccuacugcgggacuuu.....       | 2   | 0 | j09 |
| .....caucucugugcgggguucgagacc.....    | 2   | 0 | j09 |
| .....cugugcgggguucgagau.....          | 1   | 1 | j09 |
| .....cugugcgggguucgagac.....          | 1   | 0 | j09 |
| .....cugugcgggguucgagacc.....         | 1   | 0 | j09 |
| .....accgcgggugcuuacugaccuuu.....     | 1   | 0 | j09 |
| .....cgcgggugcuuacugacc.....          | 2   | 0 | j09 |
| .....cgcgggugcuuacugUccuu.....        | 2   | 1 | j09 |

cuaccgggucggaguuagcucaagcgguuaccuccuacugcggacuuucuaucuguccaucucugucgggguuucgagacccgcgggugcuuacugaccuuuuuug

|                                    |     |   |     |
|------------------------------------|-----|---|-----|
| .....cgGgggugcuuacugaccuu.....     | 1   | 1 | j09 |
| .....cgcgggugcuuacugaccuu.....     | 20  | 0 | j09 |
| .....cgcgggugcuuacuCaccuu.....     | 1   | 1 | j09 |
| .....cgUgggugcuuacugaccuu.....     | 1   | 1 | j09 |
| .....cgcgggugcuuacugaccuu.....     | 1   | 1 | j09 |
| .....cgcgggugcuuacugaccuu.....     | 1   | 1 | j09 |
| .....cgcgggugcuuacugaccuu.....     | 2   | 1 | j09 |
| .....cgcgggugcuuacugaUccuu.....    | 1   | 1 | j09 |
| .....cgcgggugcuuacugaccuuC.....    | 1   | 1 | j09 |
| .....cgcgggugcuuacugaccuuu.....    | 5   | 0 | j09 |
| ..accgggucggaguuagcucaagcgg.....   | 1   | 0 | ku3 |
| ..accgggucggaguuagcucaagcgg.....   | 1   | 0 | ku3 |
| ..ccgggucggaguuagcucaagcgg.....    | 1   | 0 | ku3 |
| ..ccgggucggaguuagcucaagcgg.....    | 5   | 0 | ku3 |
| ..ccgggGcggaguuagcucaagcgg.....    | 1   | 1 | ku3 |
| ..Accgggucggaguuagcucaagcgg.....   | 1   | 1 | ku3 |
| ..ccgggucggaguuagcucaagcggAa.....  | 1   | 1 | ku3 |
| ..ccgggucggaguuagcucaag.....       | 2   | 0 | ku3 |
| ..ccgggucggaguuagcucaagcgg.....    | 1   | 0 | ku3 |
| ..ccgggucggaguuagcucaagcgg.....    | 15  | 0 | ku3 |
| ..ccgggucggaguuagcucaagcggA.....   | 1   | 1 | ku3 |
| ..ccgggucggaguuagcucCagcgg.....    | 2   | 1 | ku3 |
| ..ccgggucggaguuagcucaagcgg.....    | 16  | 0 | ku3 |
| ..cGgggucggaguuagcucaagcgg.....    | 2   | 1 | ku3 |
| ..ccgggucggaguuagcucaagcgguu.....  | 1   | 0 | ku3 |
| ..ccgggucggaguuagcucaagcggA.....   | 7   | 1 | ku3 |
| ..ccgggucggaguuagcucaagcggAa.....  | 1   | 1 | ku3 |
| ..ccgggucggaguuagcucaagcgguaA..... | 1   | 1 | ku3 |
| ..cgggucggaguuagcucaagA.....       | 1   | 1 | ku3 |
| ..cgggucggaguuagcucaagcgg.....     | 10  | 0 | ku3 |
| ..cgggucggaguuagcucaagcggA.....    | 1   | 1 | ku3 |
| ..cgggucggaguuagcuAaagcgg.....     | 2   | 1 | ku3 |
| ..cgggucggaguuagcucGagcgg.....     | 1   | 1 | ku3 |
| ..cgggucggaguuagcucCagcgg.....     | 2   | 1 | ku3 |
| ..cgggGcggaguuagcucaagcgg.....     | 3   | 1 | ku3 |
| ..cgggucggaguuagcucaagcgg.....     | 206 | 0 | ku3 |
| ..Ugggucggaguuagcucaagcgg.....     | 1   | 1 | ku3 |
| ..cgggucggaguuagcucaCgcgg.....     | 5   | 1 | ku3 |
| ..cgggCcggaguuagcucaagcgg.....     | 1   | 1 | ku3 |
| ..cgggucggaguuagAaagcgg.....       | 1   | 1 | ku3 |
| ..Ggggucggaguuagcucaagcgg.....     | 1   | 1 | ku3 |
| ..cgggucGcaguuagcucaagcgg.....     | 1   | 1 | ku3 |
| ..cgggucggaguuagcucUagcgg.....     | 1   | 1 | ku3 |
| ..cgggucggaguuagcucaCgcgg.....     | 2   | 1 | ku3 |
| ..cgggGcggaguuagcucaagcgg.....     | 14  | 1 | ku3 |
| ..cgggucggaguuagcucaagcggC.....    | 7   | 1 | ku3 |
| ..cgggucggaguuagcucaagcgg.....     | 518 | 0 | ku3 |
| ..cAggucggaguuagcucaagcgg.....     | 1   | 1 | ku3 |
| ..cgggucggaguuagcucGagcgg.....     | 1   | 1 | ku3 |
| ..cgggucggaguuagcucGagcgg.....     | 1   | 1 | ku3 |
| ..cgggucggaguuagcucaagcggA.....    | 12  | 1 | ku3 |
| ..cgggucggaguuagcucaagcggG.....    | 16  | 1 | ku3 |
| ..cgggucggaguuagcucaagAaggu.....   | 1   | 1 | ku3 |
| ..cgggucggaguuagcucCagcgg.....     | 2   | 1 | ku3 |
| ..cgggCcggaguuagcucaagcgg.....     | 1   | 1 | ku3 |
| ..cgggucggaguuagcucaagcggGu.....   | 4   | 1 | ku3 |
| ..cgggucggaguuagcucaagcggAu.....   | 3   | 1 | ku3 |
| ..cgggucggaguuagcGcaagcgguu.....   | 1   | 1 | ku3 |
| ..cgggucggaguuagcucaagcggCu.....   | 1   | 1 | ku3 |
| ..cgggucggaguuagcucGagcgguu.....   | 1   | 1 | ku3 |
| ..cgggucggaguuagcucaaaUcgguu.....  | 1   | 1 | ku3 |
| ..cgggucggaguuagcucaagcggA.....    | 49  | 1 | ku3 |
| ..cgggucggaguuagcucaagUgguu.....   | 1   | 1 | ku3 |
| ..cgggucggaguuagcucaagcggG.....    | 2   | 1 | ku3 |
| ..cgggucggaguuagcucaagcgguu.....   | 63  | 0 | ku3 |
| ..cgggucggaguuagcucaagcggAa.....   | 12  | 1 | ku3 |
| ..cgggucggaguuagcucaagcgguuU.....  | 30  | 1 | ku3 |

cuaccgggucggaguuagcucaagcgguuaccuccuacugcggacuuucuaucuguccaucucugucgggguuucgagaccgcgggugcuuacugaccuuuuuag

|                                        |     |   |     |
|----------------------------------------|-----|---|-----|
| .....cgggucggaguuagcucaagcgguu.....    | 9   | 0 | ku3 |
| .....cgggucggaguuagcucaagcggGua.....   | 1   | 1 | ku3 |
| .....cgggucggaguuagcucaCgcgguu.....    | 1   | 1 | ku3 |
| .....cgggucggaguuagcucaagcgguuA.....   | 1   | 1 | ku3 |
| .....cgggucggaguuagcucaagcgguuU.....   | 2   | 1 | ku3 |
| .....cgggucggaguuagcucaagcgguuacA..... | 1   | 1 | ku3 |
| .....gggucggaguuagcucaagc.....         | 1   | 0 | ku3 |
| .....gggucggaguuagcucaagcgg.....       | 47  | 0 | ku3 |
| .....gggGcggaguuagcucaagcgg.....       | 1   | 1 | ku3 |
| .....gggucggaguuagcucaagcgg.....       | 182 | 0 | ku3 |
| .....gggucggaguuagcucaagcggA.....      | 5   | 1 | ku3 |
| .....gggCcgaguuagcucaagcgg.....        | 1   | 1 | ku3 |
| .....gggucggaguuagcucaagcggG.....      | 8   | 1 | ku3 |
| .....gggucggaguuagcucaagcggG.....      | 1   | 1 | ku3 |
| .....gggucggaguuagcucaagcggG.....      | 1   | 1 | ku3 |
| .....gggucggaguuagcucaagcggG.....      | 1   | 1 | ku3 |
| .....gggucggaguuagcucaagcggG.....      | 3   | 1 | ku3 |
| .....gggGcggaguuagcucaagcgg.....       | 1   | 1 | ku3 |
| .....gggucggaguuagcucaagcggC.....      | 3   | 1 | ku3 |
| .....gggucggaguuagcucaagcggG.....      | 1   | 1 | ku3 |
| .....gggucggaguuagcucaagcggG.....      | 2   | 1 | ku3 |
| .....gggucggaguuagcucaagcgguu.....     | 24  | 0 | ku3 |
| .....gggucggaguuagcucaagcggua.....     | 31  | 1 | ku3 |
| .....gggucggaguuagcucaagcgguaA.....    | 7   | 1 | ku3 |
| .....gggucggaguuagcucaagcgguuU.....    | 16  | 1 | ku3 |
| .....gggucggaguuagcucaagcggGua.....    | 1   | 1 | ku3 |
| .....gggGcggaguuagcucaagcgguu.....     | 1   | 1 | ku3 |
| .....gggucggaguuagcucaagcgguu.....     | 7   | 0 | ku3 |
| .....ggaguuagcucaagcgg.....            | 2   | 0 | ku3 |
| .....ucucugucgggguuucgagac.....        | 1   | 0 | ku3 |
| .....cgcgggugcuuacugaccu.....          | 1   | 0 | ku3 |
| .....cgcgggugcuuacugaccuu.....         | 15  | 0 | ku3 |
| .....cgcgggugcuuacugaccuA.....         | 1   | 1 | ku3 |
| .....cgcgggugcuuacugaccuu.....         | 9   | 0 | ku3 |
| .....cgcgggAgcuuacugaccuu.....         | 1   | 1 | ku3 |
| .....cgcgggugcuuacugaccuuA.....        | 1   | 1 | ku3 |
| .....cgcgggugcuuacugaccuuua.....       | 1   | 0 | ku3 |
| .....cgcgggugcuuacugaccuuuaA.....      | 1   | 1 | ku3 |
| .....accgggucggaguuagcuca.....         | 2   | 0 | j16 |
| .....accgggucggaguuagcucaagc.....      | 1   | 0 | j16 |
| .....accgggucggaguuagcucaagcgg.....    | 3   | 0 | j16 |
| .....accCggucggaguuagcucaagcgg.....    | 1   | 1 | j16 |
| .....aAccgggucggaguuagcucaagcgg.....   | 2   | 1 | j16 |
| .....accgggGcggaguuagcucaagcgg.....    | 1   | 1 | j16 |
| .....accgggucggaguuagcucaagcgg.....    | 9   | 0 | j16 |
| .....accgggucggaguuagcucaagcgguaA..... | 1   | 1 | j16 |
| .....ccgggucggaguuagcucaag.....        | 1   | 0 | j16 |
| .....ccgggucggaguuagcucaagA.....       | 1   | 1 | j16 |
| .....ccgggucggaguuagcucaagcg.....      | 5   | 0 | j16 |
| .....Uccgggucggaguuagcucaagcgg.....    | 1   | 1 | j16 |
| .....cgggucggaguuagcucaagcgg.....      | 10  | 0 | j16 |
| .....Accgggucggaguuagcucaagcgg.....    | 4   | 1 | j16 |
| .....ccgggucggaguuagcucaagcggU.....    | 1   | 1 | j16 |
| .....ccgggucggaguuagcucaagAggu.....    | 1   | 1 | j16 |
| .....ccgggAgcggaguuagcucaagcgg.....    | 1   | 1 | j16 |
| .....ccggguUggaguuagcucaagcgg.....     | 1   | 1 | j16 |
| .....ccgggucggaguuagcucaagcgg.....     | 15  | 0 | j16 |
| .....Accgggucggaguuagcucaagcgg.....    | 4   | 1 | j16 |
| .....ccgggucggaguuagcucaagcgguu.....   | 2   | 0 | j16 |
| .....ccgggucggaguuagcucaagcgguaA.....  | 1   | 1 | j16 |
| .....Accgggucggaguuagcucaagcgguu.....  | 1   | 1 | j16 |
| .....Uccgggucggaguuagcucaagcgguu.....  | 1   | 1 | j16 |
| .....ccgggucggaguuagcucaagcgguuU.....  | 1   | 1 | j16 |
| .....cgggucggaguuagcuUaag.....         | 1   | 1 | j16 |
| .....ccgggucggagUaagcucaag.....        | 1   | 1 | j16 |
| .....cgggucggaguuagcucaagc.....        | 1   | 0 | j16 |
| .....ccgggucggagUaagcucaagc.....       | 1   | 1 | j16 |
| .....cgggCcgaguuagcucaagcgg.....       | 1   | 1 | j16 |
| .....cUgggucggaguuagcucaagcgg.....     | 1   | 1 | j16 |

cuaccgggucgggaguuagcucaagcgguuaccuccuacugcggacuucuaucuguccaucucugugcgggguuucgagaccgcgggugcuuacugaccuuuuuag

|                                      |     |   |     |
|--------------------------------------|-----|---|-----|
| ...Ucgggucgggaguuagcucaagcg...       | 1   | 1 | j16 |
| ...ccgggucgggaguuagcucaagcA...       | 1   | 1 | j16 |
| ...ccgggucgggaguuagcucaagcg...       | 13  | 0 | j16 |
| ...ccgggucgggaguuagcucCagcgg...      | 3   | 1 | j16 |
| ...ccgggucgggaguuagcuUaagcgg...      | 1   | 1 | j16 |
| ...Ucgggucgggaguuagcucaagcgg...      | 1   | 1 | j16 |
| ...ccgggucgggaguuagcucaagcggU...     | 1   | 1 | j16 |
| ...ccgggucgggaguuagcucCagcucagcgg... | 1   | 1 | j16 |
| ...ccgggucgggaguuagcucaagcgg...      | 2   | 1 | j16 |
| ...cGgggucgggaguuagcucaagcgg...      | 2   | 1 | j16 |
| ...ccgggucgggaguuagcucaagcgg...      | 1   | 1 | j16 |
| ...ccgggucgggCguuagcucaagcgg...      | 2   | 1 | j16 |
| ...ccgggucggAaguuagcucaagcgg...      | 1   | 1 | j16 |
| ...ccgggucgggaguuagcucaUgcccgg...    | 1   | 1 | j16 |
| ...ccgggucgggaguuagcucaagcgg...      | 1   | 1 | j16 |
| ...cUgggucgggaguuagcucaagcgg...      | 1   | 1 | j16 |
| ...ccgggucgggaguuagcucaaUcgg...      | 1   | 1 | j16 |
| ...ccgggucgggaguuagcucaagcggA...     | 2   | 1 | j16 |
| ...ccgggucgggaguuagcucaagcggU...     | 1   | 1 | j16 |
| ...ccgggucgggaguuagcucaagcggC...     | 1   | 1 | j16 |
| ...ccgggucgggaguuagcucaagcgg...      | 152 | 0 | j16 |
| ...ccgggucgggaguuagcucaagUgg...      | 1   | 1 | j16 |
| ...ccgggucgggaguuAacucaagcgg...      | 1   | 1 | j16 |
| ...ccgggucAagaguuagcucaagcgg...      | 1   | 1 | j16 |
| ...ccgggucgggaguuagcucaCgcccgg...    | 1   | 1 | j16 |
| ...ccgggucgggaguuagcuUaagcggg...     | 1   | 1 | j16 |
| ...ccgggucgggaguuagcucaagcggg...     | 1   | 1 | j16 |
| ...ccgggucgggaguuagcucaagcggg...     | 179 | 0 | j16 |
| ...ccgggucgggaguuagcucCagcggg...     | 1   | 1 | j16 |
| ...ccgggucgggaguuagcucaagcgggA...    | 18  | 1 | j16 |
| ...ccgggucgggCguuagcucaagcggg...     | 1   | 1 | j16 |
| ...ccgggucgggaguuagcucaagcggg...     | 2   | 1 | j16 |
| ...Ucgggucgggaguuagcucaagcggg...     | 2   | 1 | j16 |
| ...ccgggucgggaguuagAucuaagcggg...    | 1   | 1 | j16 |
| ...ccgggucgggaguuagcucaagcggG...     | 2   | 1 | j16 |
| ...ccCgggucgggaguuagcucaagcggg...    | 1   | 1 | j16 |
| ...cAgggucgggaguuagcucaagcggg...     | 1   | 1 | j16 |
| ...ccAgggucgggaguuagcucaagcggg...    | 1   | 1 | j16 |
| ...ccgggucgggaguuagcucCagcggg...     | 1   | 1 | j16 |
| ...ccgggucgggaguuagcucaagcggg...     | 24  | 0 | j16 |
| ...ccgggucgggaguuagcucaagcggg...     | 1   | 1 | j16 |
| ...cGgggucgggaguuagcucaagcggg...     | 1   | 1 | j16 |
| ...ccgggucgggaguuagcucaagcgggA...    | 14  | 1 | j16 |
| ...ccgggucgggaguuagcucaagcgggAa...   | 1   | 1 | j16 |
| ...ccgggucgggaguuagcucaagcgggU...    | 4   | 1 | j16 |
| ...ccgggucgggaguuagcucaagcgggU...    | 1   | 1 | j16 |
| ...cgggucgggaguuagcucaa...           | 4   | 0 | j16 |
| ...cgggucgggaguuagcucaag...          | 1   | 1 | j16 |
| ...cgggucgggaguuagcucaag...          | 32  | 0 | j16 |
| ...cgggAacgggaguuagcucaag...         | 1   | 1 | j16 |
| ...cgggucgggaguuagcucaag...          | 1   | 1 | j16 |
| ...Ggggucgggaguuagcucaag...          | 1   | 1 | j16 |
| ...cgggucgggaguuagcucaagc...         | 2   | 1 | j16 |
| ...cgggucgggaguuagcucGagc...         | 1   | 1 | j16 |
| ...cgggucgggaguuagcucaagA...         | 6   | 1 | j16 |
| ...cgggucgggaguuagcucaagc...         | 1   | 1 | j16 |
| ...cgggucgggaguuagcuAaagc...         | 1   | 1 | j16 |
| ...cgggucgggaguuagcuUaagc...         | 1   | 1 | j16 |
| ...cgggucgggaguuagcucaagc...         | 37  | 0 | j16 |
| ...Ggggucgggaguuagcucaagc...         | 1   | 1 | j16 |
| ...cgggucgggaguuagcucaCgcg...        | 1   | 1 | j16 |
| ...cgggucgggaguuagcucaagcgg...       | 430 | 0 | j16 |
| ...cgggucgggCguuagcucaagcgg...       | 1   | 1 | j16 |
| ...cgggucgggaguuagcucaagcgg...       | 1   | 1 | j16 |
| ...cgggucAagaguuagcucaagcgg...       | 1   | 1 | j16 |
| ...Ugggucgggaguuagcucaagcgg...       | 1   | 1 | j16 |
| ...cgggucgggaguuagcucaagcgg...       | 1   | 1 | j16 |
| ...cgggucgggaguuagAucuaagcgg...      | 3   | 1 | j16 |

cuaccgggucgggaguuagcucaagcgguuaccuccuacugcgggacuuucuaucuguccaucucugugcgggguuucgagaccgcggggugcuuacugaccuuuuuag

|                                     |      |   |     |
|-------------------------------------|------|---|-----|
| .....cgggucgggaguuagcuAaagcg.....   | 2    | 1 | j16 |
| .....cgggGcgggaguuagcucaagcg.....   | 11   | 1 | j16 |
| .....cgggucgggAuuagcucaagcg.....    | 1    | 1 | j16 |
| .....cgggucgggaguuagcucaagcU.....   | 3    | 1 | j16 |
| .....cgggCcgggaguuagcucaagcg.....   | 2    | 1 | j16 |
| .....cgggucgggaguuCgcucaagcg.....   | 1    | 1 | j16 |
| .....cgggucgggaguuagUucaagcg.....   | 5    | 1 | j16 |
| .....cgggucgggaguuagcucaagcA.....   | 7    | 1 | j16 |
| .....cgggucGcaguuagcucaagcg.....    | 1    | 1 | j16 |
| .....cgggucgggaguuUcucucaagcg.....  | 2    | 1 | j16 |
| .....cgCgucgggaguuagcucaagcg.....   | 1    | 1 | j16 |
| .....cgggucgggaguuagcuUaagcg.....   | 1    | 1 | j16 |
| .....cgggucgggagGuaagcucaagcg.....  | 1    | 1 | j16 |
| .....cgggucgggACuuagcucaagcg.....   | 2    | 1 | j16 |
| .....cgggucgggaguuagcucaagUg.....   | 1    | 1 | j16 |
| .....cgggAcgggaguuagcucaagcg.....   | 4    | 1 | j16 |
| .....cgggucgggAuuagcucaagcgg.....   | 1    | 1 | j16 |
| .....cgggucgggaguuGgcucaagcgg.....  | 4    | 1 | j16 |
| .....cgggucgggaguuagcucaaCcg.....   | 6    | 1 | j16 |
| .....Ggggucgggaguuagcucaagcgg.....  | 16   | 1 | j16 |
| .....cgggucgggaguuagcGcaagcgg.....  | 5    | 1 | j16 |
| .....cgggucgggaguuagcucaagcgg.....  | 5920 | 0 | j16 |
| .....cgggucgggaguuagcucaagcAg.....  | 2    | 1 | j16 |
| .....cgggucgggaguuagcucaagcU.....   | 23   | 1 | j16 |
| .....cgggucgggaguuagcucaagcG.....   | 11   | 1 | j16 |
| .....cgggucgggaguuAucucaagcgg.....  | 2    | 1 | j16 |
| .....cgggucgggaguuACcucaagcgg.....  | 1    | 1 | j16 |
| .....Ugggucgggaguuagcucaagcgg.....  | 21   | 1 | j16 |
| .....cgggucgggaguuagcucaagUgg.....  | 8    | 1 | j16 |
| .....cgAgucgggaguuagcucaagcgg.....  | 5    | 1 | j16 |
| .....cgggucgggaguuagAucaagcgg.....  | 17   | 1 | j16 |
| .....cggAucgggaguuagcucaagcgg.....  | 1    | 1 | j16 |
| .....cgggCcgggaguuagcucaagcgg.....  | 27   | 1 | j16 |
| .....cgggucgggaguuagcucaaAcgg.....  | 2    | 1 | j16 |
| .....cgggAcgggaguuagcucaagcgg.....  | 28   | 1 | j16 |
| .....cgggucgggagGuaagcucaagcgg..... | 29   | 1 | j16 |
| .....cgggucgggaguuagcucaagcUg.....  | 24   | 1 | j16 |
| .....cggUucgggaguuagcucaagcgg.....  | 4    | 1 | j16 |
| .....cgUgucgggaguuagcucaagcgg.....  | 1    | 1 | j16 |
| .....cgggucgggaguuagcucaaUcgg.....  | 16   | 1 | j16 |
| .....cgggucgggaguuagcuUaagcgg.....  | 8    | 1 | j16 |
| .....cgggucgggaguuagcAcaagcgg.....  | 1    | 1 | j16 |
| .....cgggucgggAuuagcucaagcgg.....   | 1    | 1 | j16 |
| .....cgggucgggGuuagcucaagcgg.....   | 7    | 1 | j16 |
| .....cgggucgggaguuagcucaagAgg.....  | 5    | 1 | j16 |
| .....cgggucgggaguuagUucaagcgg.....  | 9    | 1 | j16 |
| .....cgggucgggaguuagcucaagcAg.....  | 57   | 1 | j16 |
| .....cgggucgggaguuagcucaagcCg.....  | 2    | 1 | j16 |
| .....cgggucgggaguuagcucaCgcgg.....  | 20   | 1 | j16 |
| .....cgggucAgaguuagcucaagcgg.....   | 1    | 1 | j16 |
| .....cggCucgggaguuagcucaagcgg.....  | 4    | 1 | j16 |
| .....cgggucgggaguuCgcucaagcgg.....  | 1    | 1 | j16 |
| .....cgggucgggagCuagcucaagcgg.....  | 7    | 1 | j16 |
| .....cgggucgggaguuagcucGagcgg.....  | 6    | 1 | j16 |
| .....cgggucgUaguuagcucaagcgg.....   | 8    | 1 | j16 |
| .....cgggucgggaguuagGucaagcgg.....  | 2    | 1 | j16 |
| .....cggguUggaguuagcucaagcgg.....   | 12   | 1 | j16 |
| .....cgggucgggaguuagcuGaagcgg.....  | 1    | 1 | j16 |
| .....cgggucgggCguagcucaagcgg.....   | 13   | 1 | j16 |
| .....cgggucgggaguuagcucCagcgg.....  | 17   | 1 | j16 |
| .....cgggGcgggaguuagcucaagcgg.....  | 81   | 1 | j16 |
| .....cgggucgAaguuagcucaagcgg.....   | 2    | 1 | j16 |
| .....cgggucgggaguuUcucucaagcgg..... | 17   | 1 | j16 |
| .....cgggucgggaguuagcuAaagcgg.....  | 12   | 1 | j16 |
| .....cggguAaggaguuagcucaagcgg.....  | 3    | 1 | j16 |
| .....cgggucCgaguuagcucaagcgg.....   | 2    | 1 | j16 |
| .....cCggucgggaguuagcucaagcgg.....  | 1    | 1 | j16 |
| .....cgggucgggaguuagcucaGgcgg.....  | 2    | 1 | j16 |
| .....cgggucGcaguuagcucaagcgg.....   | 2    | 1 | j16 |

cuaccgggucgggaguuagcucaagcgguuaccuccuacugcggacuuucuaucuguccaucucugucgugggguucgagaccgcgggugcuuacugaccuuuuuag

|                                      |       |   |     |
|--------------------------------------|-------|---|-----|
| .....cgggucgggagAuaagcucaagcgg.....  | 9     | 1 | j16 |
| .....cgggucgggaguuUgcucaagcgg.....   | 2     | 1 | j16 |
| .....cgggucgggaguuagcucUagcgg.....   | 6     | 1 | j16 |
| .....cgggucgggagUGagcucaagcgg.....   | 1     | 1 | j16 |
| .....cUggucgggaguuagcucaagcgg.....   | 1     | 1 | j16 |
| .....cgggucgggaguuagcCcaagcgg.....   | 2     | 1 | j16 |
| .....cgggucgggUguuuagcucaagcgg.....  | 5     | 1 | j16 |
| .....Agggucgggaguuagcucaagcgg.....   | 6     | 1 | j16 |
| .....cgggucgggagUGagcucaagcgg.....   | 10    | 1 | j16 |
| .....cAggucgggaguuagcucaagcgg.....   | 7     | 1 | j16 |
| .....cgggucgggaguuagcucaCgcgg.....   | 46    | 1 | j16 |
| .....cgggucgggaguuagUucaagcgg.....   | 14    | 1 | j16 |
| .....cgggucgggagGuaagcucaagcgg.....  | 53    | 1 | j16 |
| .....cgggucgggaguuagcucCagcgg.....   | 19    | 1 | j16 |
| .....cgggucgggaguuUcucaagcgg.....    | 30    | 1 | j16 |
| .....Ugggucgggaguuagcucaagcgg.....   | 22    | 1 | j16 |
| .....cgggucgggaguuagcucaagcgg.....   | 10141 | 0 | j16 |
| .....cgggucgggagUGagcucaagcgg.....   | 11    | 1 | j16 |
| .....cgggucgggaguuagcucaagcggG.....  | 27    | 1 | j16 |
| .....Agggucgggaguuagcucaagcgg.....   | 14    | 1 | j16 |
| .....Ggggucgggaguuagcucaagcgg.....   | 31    | 1 | j16 |
| .....cgggucgggaguuagcAcaagcgg.....   | 5     | 1 | j16 |
| .....cgUgucgggaguuagcucaagcgg.....   | 3     | 1 | j16 |
| .....cgggucgUaguuagcucaagcgg.....    | 5     | 1 | j16 |
| .....cgggucgggaguuagcucaagcGcu.....  | 4     | 1 | j16 |
| .....cgggGcgggaguuagcucaagcgg.....   | 186   | 1 | j16 |
| .....cCggucgggaguuagcucaagcgg.....   | 5     | 1 | j16 |
| .....cgggucgggaguuagcucaagcggC.....  | 94    | 1 | j16 |
| .....cgggucggcGuuagcucaagcgg.....    | 15    | 1 | j16 |
| .....cgggucgggAUuuagcucaagcgg.....   | 4     | 1 | j16 |
| .....cgggucgAaguuagcucaagcgg.....    | 2     | 1 | j16 |
| .....cgggAcgggaguuagcucaagcgg.....   | 59    | 1 | j16 |
| .....cgggucgggaguuagcucGagcgg.....   | 3     | 1 | j16 |
| .....cgggucgggaguuagcucaUgcgg.....   | 1     | 1 | j16 |
| .....cgggucgggagUGagcucaagcgg.....   | 4     | 1 | j16 |
| .....cgggucgggaguuagcAuaagcgg.....   | 20    | 1 | j16 |
| .....cgggucgggaguuagcucaagGgg.....   | 2     | 1 | j16 |
| .....cgggucgggaguuGgcucaagcgg.....   | 1     | 1 | j16 |
| .....cgggucgggagAUagcucaagcgg.....   | 19    | 1 | j16 |
| .....cgggucgggaguuagcCcaagcgg.....   | 8     | 1 | j16 |
| .....cgggucgggACuuagcucaagcgg.....   | 7     | 1 | j16 |
| .....cgggucgggaguuagcucaagcAgu.....  | 2     | 1 | j16 |
| .....cgggucgggUguuuagcucaagcgg.....  | 4     | 1 | j16 |
| .....cgggucgggaguuAacucaagcgg.....   | 4     | 1 | j16 |
| .....cgggucgggaguuagcucaaUcgg.....   | 27    | 1 | j16 |
| .....cgAucgggaguuagcucaagcgg.....    | 4     | 1 | j16 |
| .....cgggucgggaguuagcuUaagcgg.....   | 14    | 1 | j16 |
| .....cgCgucgggaguuagcucaagcgg.....   | 2     | 1 | j16 |
| .....cUggucgggaguuagcucaagcgg.....   | 5     | 1 | j16 |
| .....cgggucgggaguuagGuaagcgg.....    | 2     | 1 | j16 |
| .....cgggucgggaguuagcucaagcCgu.....  | 2     | 1 | j16 |
| .....cggguUgggaguuagcucaagcgg.....   | 5     | 1 | j16 |
| .....cgggucgggaguuagcucaGgcgg.....   | 5     | 1 | j16 |
| .....cgggucgggGguuuagcucaagcgg.....  | 9     | 1 | j16 |
| .....cgggucgggaguuACucaagcgg.....    | 3     | 1 | j16 |
| .....cggAucgggaguuagcucaagcgg.....   | 7     | 1 | j16 |
| .....cgggucAagaguuagcucaagcgg.....   | 5     | 1 | j16 |
| .....cgggucgggAUuuagcucaagcgg.....   | 4     | 1 | j16 |
| .....cgggucgggaguuagcucaagcGU.....   | 32    | 1 | j16 |
| .....cgggucgggaguuUgcucaagcgg.....   | 1     | 1 | j16 |
| .....cggCucgggaguuagcucaagcgg.....   | 1     | 1 | j16 |
| .....cgggucgggaguuagcucaagcUgu.....  | 29    | 1 | j16 |
| .....cgggucgggaguuagcucaagUggu.....  | 7     | 1 | j16 |
| .....cgggucgCaguuagcucaagcgg.....    | 3     | 1 | j16 |
| .....cgggucgggaguuagcuGaaagcgg.....  | 2     | 1 | j16 |
| .....cgggucgggaguuagcGcaagcgg.....   | 3     | 1 | j16 |
| .....cggUucgggaguuagcucaagcgg.....   | 3     | 1 | j16 |
| .....cgggucgggaguuagcucaagAaggu..... | 6     | 1 | j16 |
| .....cgggCcgggaguuagcucaagcgg.....   | 38    | 1 | j16 |

cuaccgggucgggaguuagcucaagcgguuaccuccuacugcggacuuucuaucuguccaucucugugcgggguucgagaccgcgggugcuuacugaccuuuuuag

|                                        |      |   |     |
|----------------------------------------|------|---|-----|
| .....cAgggucgggaguuagcucaagcgggu.....  | 6    | 1 | j16 |
| .....cgggucgggaguuagcucaagcggAu.....   | 5    | 1 | j16 |
| .....cgggucgggagCuagcucaagcgggu.....   | 12   | 1 | j16 |
| .....cgggucCgaguuagcucaagcgggu.....    | 5    | 1 | j16 |
| .....cgggucgggaguuagcuLaagcgggu.....   | 23   | 1 | j16 |
| .....cggguAaggaguuagcucaagcgggu.....   | 9    | 1 | j16 |
| .....cgggucgggaguuagcucaagcggA.....    | 364  | 1 | j16 |
| .....cgggucgggaguuagcucaaaAcgggu.....  | 5    | 1 | j16 |
| .....cgggucgggaguuCgcucaagcgggu.....   | 5    | 1 | j16 |
| .....cgggucUgaguuagcucaagcgggu.....    | 2    | 1 | j16 |
| .....cgggucgggaguuagcucaaCcggu.....    | 10   | 1 | j16 |
| .....cgggucgggaguuagcucUagcgggu.....   | 8    | 1 | j16 |
| .....cgggucgggaguuUcuaagcgggu.....     | 4    | 1 | j16 |
| .....cgggucgggaguuagcucaaUcggu.....    | 2    | 1 | j16 |
| .....cgggucgggaguuagcucaagcggguC.....  | 7    | 1 | j16 |
| .....cgggucgggaguuagcucaagcggCuu.....  | 1    | 1 | j16 |
| .....cgggucgggAuuagcucaagcgggu.....    | 4    | 1 | j16 |
| .....cgggucgggaguuagcucCagcgggu.....   | 3    | 1 | j16 |
| .....Ugggucgggaguuagcucaagcgggu.....   | 3    | 1 | j16 |
| .....cggAuaggaguuagcucaagcgggu.....    | 1    | 1 | j16 |
| .....cgggucgggaguuagcucaagcUggu.....   | 1    | 1 | j16 |
| .....cgggucgggCguuagcucaagcgggu.....   | 4    | 1 | j16 |
| .....cgggucgggaguuagcucaagUgggu.....   | 2    | 1 | j16 |
| .....cgggucgggaguuagcucUagcgggu.....   | 1    | 1 | j16 |
| .....cgggAcggaguuagcucaagcgggu.....    | 6    | 1 | j16 |
| .....cgggucgggaguuagcucaagcggAu.....   | 12   | 1 | j16 |
| .....cgggucgggAgaguuagcucaagcgggu..... | 1    | 1 | j16 |
| .....cgggucgggaguuagcucaagcgggu.....   | 1185 | 0 | j16 |
| .....cgggucgUaguuagcucaagcgggu.....    | 2    | 1 | j16 |
| .....cgggucgggaguuagcucaagAggu.....    | 2    | 1 | j16 |
| .....cgggucgggaguuCagcucaagcgggu.....  | 1    | 1 | j16 |
| .....cgggucgggGuaagcucaagcgggu.....    | 8    | 1 | j16 |
| .....cgggucgggGuuagcucaagcgggu.....    | 1    | 1 | j16 |
| .....cggCucggaguuagcucaagcgggu.....    | 1    | 1 | j16 |
| .....cgggucgggaguuagcucaCgcgggu.....   | 3    | 1 | j16 |
| .....cgggucgggaguuagcuLaagcgggu.....   | 2    | 1 | j16 |
| .....cgggucgggaguuagLucaagcgggu.....   | 2    | 1 | j16 |
| .....cgggucAgaguuagcucaagcgggu.....    | 2    | 1 | j16 |
| .....cgCgucggaguuagcucaagcgggu.....    | 1    | 1 | j16 |
| .....cgggucCgaguuagcucaagcgggu.....    | 2    | 1 | j16 |
| .....Ggggucgggaguuagcucaagcgggu.....   | 8    | 1 | j16 |
| .....cgggucgggaguuagcAcaagcgggu.....   | 2    | 1 | j16 |
| .....cgggucgggaguuagcuUgcgggu.....     | 2    | 1 | j16 |
| .....cgggucgggaguuagcucaagcggguG.....  | 22   | 1 | j16 |
| .....cgggucgggaguuagcucaagcggCu.....   | 17   | 1 | j16 |
| .....cgggucgggAuuagcucaagcgggu.....    | 2    | 1 | j16 |
| .....cgggucgggaguuagcCcaagcgggu.....   | 1    | 1 | j16 |
| .....cgggucgggaguuagcucaagcggUuu.....  | 1    | 1 | j16 |
| .....cgggucgggaguuagcucaagcggGu.....   | 4    | 1 | j16 |
| .....cgggucGggaguuagcucaagcgggu.....   | 1    | 1 | j16 |
| .....cgggCcggaguuagcucaagcgggu.....    | 5    | 1 | j16 |
| .....cgggucgggaguuagcucaagcggguA.....  | 836  | 1 | j16 |
| .....cgggGcggaguuagcucaagcgggu.....    | 24   | 1 | j16 |
| .....cgggucgggaguuagcucaaaAcgggu.....  | 1    | 1 | j16 |
| .....cgggucgggaguuagcucaagcggguua..... | 53   | 0 | j16 |
| .....cggCucgggaguuagcucaagcggguua..... | 2    | 1 | j16 |
| .....cgggucgggaguuagcucaagcggguCa..... | 3    | 1 | j16 |
| .....cgggucgggaguuagcucaagcggguU.....  | 184  | 1 | j16 |
| .....cgggucgggaguuagcucaagcggguGa..... | 3    | 1 | j16 |
| .....cgggucgggaguuagcucaagcggCu.....   | 1    | 1 | j16 |
| .....cgggucgggaguuagcucaagcggguAa..... | 343  | 1 | j16 |
| .....cgggucgggaguuagcucaagcggguG.....  | 8    | 1 | j16 |
| .....cgggCcggaguuagcucaagcggguua.....  | 1    | 1 | j16 |
| .....cgggucgggaguuagcucaagcggguuC..... | 1    | 1 | j16 |
| .....cgggucgggaguuagcucaagcggguuU..... | 6    | 1 | j16 |
| .....cgggucgggaguuagcucaagcggguuA..... | 8    | 1 | j16 |
| .....gggucgggaguuagcucaagc.....        | 2    | 0 | j16 |
| .....gggucgggaguuagcucaagcgg.....      | 7    | 0 | j16 |
| .....gggCcggaguuagcucaagcgg.....       | 1    | 1 | j16 |

cuaccgggucgggaguuagcucaagcgguuaccuccuacugcggacuuucuaucuguccaucucugugcgggguuucgagaccgcgggugcuuacugaccuuuuuag

|                                    |     |   |     |
|------------------------------------|-----|---|-----|
| .....Cggucgggaguuagcucaagcg.....   | 1   | 1 | j16 |
| .....gggucgggaguuagcucaCgagg.....  | 1   | 1 | j16 |
| .....gggucgggaguuagcucaagcgU.....  | 2   | 1 | j16 |
| .....gggucgggaguuagcuAaagcgg.....  | 1   | 1 | j16 |
| .....ggAucgggaguuagcucaagcgg.....  | 1   | 1 | j16 |
| .....gggCcgaguuagcucaagcgg.....    | 2   | 1 | j16 |
| .....gggucgggaguuUcuaagcgg.....    | 1   | 1 | j16 |
| .....gggucgggaguuagcucaagcUg.....  | 1   | 1 | j16 |
| .....gggucgggCguuagcucaagcgg.....  | 1   | 1 | j16 |
| .....gggucgggaguuagcucaagcgg.....  | 191 | 0 | j16 |
| .....gggucgggaguuCgcuaagcgg.....   | 2   | 1 | j16 |
| .....gggCcgaguuagcucaagcgg.....    | 2   | 1 | j16 |
| .....gggucgggaguuagcucCagcgg.....  | 2   | 1 | j16 |
| .....gggucgCaguuaagcucaagcgg.....  | 1   | 1 | j16 |
| .....gggCcgaguuagcucaagcgg.....    | 19  | 1 | j16 |
| .....gAucgggaguuagcucaagcgg.....   | 1   | 1 | j16 |
| .....gggucgggaguuagcucaagGgg.....  | 1   | 1 | j16 |
| .....Aggucgggaguuagcucaagcgg.....  | 1   | 1 | j16 |
| .....gggucAgaguuaagcucaagcgg.....  | 1   | 1 | j16 |
| .....gggucgggaguuUcuaagcgg.....    | 4   | 1 | j16 |
| .....gggucgggaguuagUuaagcgg.....   | 2   | 1 | j16 |
| .....gggucgggaguuAagcucaagcgg..... | 1   | 1 | j16 |
| .....gggucgggCguuagcucaagcgg.....  | 2   | 1 | j16 |
| .....gggucgggaguuCgcuaagcgg.....   | 1   | 1 | j16 |
| .....gggucgggaguuagcucaUgcgg.....  | 1   | 1 | j16 |
| .....gggucgggaguuagcucaaUcgg.....  | 3   | 1 | j16 |
| .....gggucgggaguuagcucaCgagg.....  | 1   | 1 | j16 |
| .....gggucgUaguuaagcucaagcgg.....  | 1   | 1 | j16 |
| .....gggucgggAuaagcucaagcgg.....   | 2   | 1 | j16 |
| .....gggAucgggaguuagcucaagcgg..... | 1   | 1 | j16 |
| .....gCucgggaguuagcucaagcgg.....   | 2   | 1 | j16 |
| .....gggucgggaguuagcucaagcggA..... | 23  | 1 | j16 |
| .....gggucgggaguuagcucaagcgg.....  | 930 | 0 | j16 |
| .....gggucgggaguuagcucaagcggG..... | 9   | 1 | j16 |
| .....gggucgggaguuagcucaagcUgu..... | 2   | 1 | j16 |
| .....gggucgggagCuagcucaagcgg.....  | 2   | 1 | j16 |
| .....Cggucgggaguuagcucaagcgg.....  | 9   | 1 | j16 |
| .....gggucgggaguuagcucCagcgg.....  | 5   | 1 | j16 |
| .....gggucgggaguuagcGcaagcgg.....  | 1   | 1 | j16 |
| .....gggucgggaguuagcucGagcgg.....  | 1   | 1 | j16 |
| .....gggucgggaguuagcucaagcCgu..... | 1   | 1 | j16 |
| .....gggucgggaguuGgcuaagcgg.....   | 1   | 1 | j16 |
| .....gggucgggaguuagcAcaagcgg.....  | 1   | 1 | j16 |
| .....gggucgggaguuagcucaagUgg.....  | 1   | 1 | j16 |
| .....gggucgggaguuagcCcaagcgg.....  | 1   | 1 | j16 |
| .....gggucgggaguuagAuaagcgg.....   | 5   | 1 | j16 |
| .....gggucAagaguuagcucaagcgg.....  | 1   | 1 | j16 |
| .....gggucgggaguuagcucaagcGU.....  | 4   | 1 | j16 |
| .....gggucgggaguuagcucaaCcg.....   | 2   | 1 | j16 |
| .....gggucgggaguuagcucaagcggC..... | 10  | 1 | j16 |
| .....gggucgggaguuAuccuaagcgg.....  | 1   | 1 | j16 |
| .....gggucggaUuuagcucaagcgg.....   | 2   | 1 | j16 |
| .....ggAucgggaguuagcucaagcgg.....  | 1   | 1 | j16 |
| .....gggCcgaguuagcucaagcgg.....    | 3   | 1 | j16 |
| .....gggucgCaguuaagcucaagcgg.....  | 1   | 1 | j16 |
| .....gggucgggaguuagcucaagcggU..... | 5   | 1 | j16 |
| .....gggucgggaguuagcucaUgcgg.....  | 2   | 1 | j16 |
| .....gggucgggaguuagcucaagcggA..... | 2   | 1 | j16 |
| .....ggguUggaguuagcucaagcgg.....   | 1   | 1 | j16 |
| .....gggucgggaguuagcucaagcggA..... | 74  | 1 | j16 |
| .....Uggucgggaguuagcucaagcgg.....  | 1   | 1 | j16 |
| .....gggucgggaguuagcucCagcgg.....  | 3   | 1 | j16 |
| .....gggucgggaguuagcucaagcggC..... | 1   | 1 | j16 |
| .....gggucgggaguuUcuaagcgg.....    | 2   | 1 | j16 |
| .....gggucgggaguuagcuAaagcgg.....  | 2   | 1 | j16 |
| .....gggucgggaguuagcucaaCcg.....   | 2   | 1 | j16 |
| .....gggCcgaguuagcucaagcgg.....    | 1   | 1 | j16 |
| .....ggAucgggaguuagcucaagcgg.....  | 1   | 1 | j16 |
| .....gggucgggaguuagcucaagAgg.....  | 1   | 1 | j16 |



cuaccgggucggaguuagcucaagcgguuuaccuccucaugcggacuucuaucuguccaucucugucgggguuucgagaccgcggggucuuacugaccuuuuuag

|                                       |     |   |     |
|---------------------------------------|-----|---|-----|
| .....gggAcggaguuagcucaagcgguu.....    | 2   | 1 | j16 |
| .....gggGcggaguuagcucaagcgguu.....    | 5   | 1 | j16 |
| .....gggucggagCuagcucaagcgguu.....    | 2   | 1 | j16 |
| .....gggucggaguuagcCcaagcgguu.....    | 1   | 1 | j16 |
| .....gggucggaguuagcucaagcgguu.....    | 375 | 0 | j16 |
| .....gggucggaguuagcucaagcgguuG.....   | 1   | 1 | j16 |
| .....gggucggaguuCgcucaagcgguu.....    | 2   | 1 | j16 |
| .....gggucggaguuagcucaagcggUuu.....   | 3   | 1 | j16 |
| .....gggucggaguuagUucaagcgguu.....    | 1   | 1 | j16 |
| .....gggucggaguuagcucaagcgguuU.....   | 127 | 1 | j16 |
| .....gggucggaguuagcucaagcgguuAa.....  | 26  | 1 | j16 |
| .....gggucggaguuagcucaagcgguuu.....   | 15  | 0 | j16 |
| .....gggucggaguuagcucaagcgguuac.....  | 1   | 0 | j16 |
| .....gggucggaguuagcucaagcgguuAac..... | 1   | 1 | j16 |
| .....gggucggaguuagcucaagcgguuuA.....  | 5   | 1 | j16 |
| .....ggucggaguuagcucaagcgguu.....     | 2   | 0 | j16 |
| .....ggucggaguuagcucaagcgguuA.....    | 1   | 1 | j16 |
| .....ggucggaguuagcucaagcgguu.....     | 4   | 0 | j16 |
| .....gucggaguuagcucaagcgguu.....      | 1   | 0 | j16 |
| .....ucggaguuagcucaagcgguu.....       | 6   | 0 | j16 |
| .....Gggaguuagcucaagcgguu.....        | 2   | 1 | j16 |
| .....cggaguuagcucaagcgguuA.....       | 1   | 1 | j16 |
| .....ggagGuagcucaagcgguu.....         | 1   | 1 | j16 |
| .....ggaguuagcucaagAggu.....          | 1   | 1 | j16 |
| .....ggaguuagcucaagcgguu.....         | 9   | 0 | j16 |
| .....ggaguuagcucaagcUgu.....          | 1   | 1 | j16 |
| .....ggaguuagcucaagcgguu.....         | 1   | 0 | j16 |
| .....ggaguuagcucaagcgguuA.....        | 3   | 1 | j16 |
| .....ggaguuagcucaagcgguuU.....        | 1   | 1 | j16 |
| .....cgguuaccuccucaugAcggacu.....     | 1   | 1 | j16 |
| .....cgguuaccuccucaugcggacu.....      | 1   | 0 | j16 |
| .....uaccuccucaGgccggacuuu.....       | 1   | 1 | j16 |
| .....uaccuccucaugcggacuuu.....        | 6   | 0 | j16 |
| .....uaccuccucaugcggUacuuu.....       | 1   | 1 | j16 |
| .....uaccuccucaugcggacuuu.....        | 1   | 0 | j16 |
| .....uaccGccucaugcggacuuu.....        | 1   | 1 | j16 |
| .....uaccuccucaugcggacuuuau.....      | 1   | 0 | j16 |
| .....accgcgggucuuacugacc.....         | 1   | 0 | j16 |
| .....accgcgggAgcuuacugacc.....        | 1   | 1 | j16 |
| .....accgcgggucuuacugaccuu.....       | 2   | 0 | j16 |
| .....Acgcgggucuuacugaccuu.....        | 2   | 1 | j16 |
| .....cgcggggucuuacugaccA.....         | 1   | 1 | j16 |
| .....cgcggggucuuacuUacc.....          | 1   | 1 | j16 |
| .....cgcggggucuuacugacc.....          | 12  | 0 | j16 |
| .....cgUgggugcuuacugacc.....          | 1   | 1 | j16 |
| .....cgcggggucuuacugacc.....          | 4   | 0 | j16 |
| .....cgUgggugcuuacugaccuu.....        | 1   | 1 | j16 |
| .....cgcggggucuuAagaccuu.....         | 1   | 1 | j16 |
| .....cgcggggucuuacugaccG.....         | 1   | 1 | j16 |
| .....cgcggggucuuacugaccuu.....        | 1   | 1 | j16 |
| .....cgcggggucuuacugaccuu.....        | 3   | 1 | j16 |
| .....cgAggggucuuacugaccuu.....        | 1   | 1 | j16 |
| .....cgcggggucGuacugaccuu.....        | 1   | 1 | j16 |
| .....cgcgAgugcuuacugaccuu.....        | 2   | 1 | j16 |
| .....cgcggggUcuuacugaccuu.....        | 1   | 1 | j16 |
| .....cgcggggucuuacugaccuu.....        | 254 | 0 | j16 |
| .....cgcggggucuuacugaccC.....         | 2   | 1 | j16 |
| .....cgcggggUuuacugaccuu.....         | 1   | 1 | j16 |
| .....cgcggggUuuacugaccuu.....         | 1   | 1 | j16 |
| .....cgcggggAgcuuacugaccuu.....       | 4   | 1 | j16 |
| .....cgcggggucuuacuAaccuu.....        | 1   | 1 | j16 |
| .....cgcggggucuuacuUaccuu.....        | 1   | 1 | j16 |
| .....cCcggggucuuacugaccuu.....        | 1   | 1 | j16 |
| .....cgcggggucuuacugaAccu.....        | 1   | 1 | j16 |
| .....cgcggggucuuacugCccuu.....        | 1   | 1 | j16 |
| .....cgcgggCgcuuacugaccuu.....        | 3   | 1 | j16 |
| .....cgcggggucuuacugaccG.....         | 1   | 1 | j16 |
| .....cUcggggucuuacugaccuu.....        | 1   | 1 | j16 |
| .....cgcggggucuuacugaccuu.....        | 2   | 1 | j16 |

cuaccgggucggaguagcucaagcgguuaccuccuacugcggacuucuaucuguccaucugugcggguucgagaccgcgggugcuuacugacccuuuaug

|                                   |      |   |     |
|-----------------------------------|------|---|-----|
| .....cgcgggugcuuacAgacccuu.....   | 1    | 1 | j16 |
| .....Ugcgggugcuuacugacccuu.....   | 1    | 1 | j16 |
| .....cGAgggugcuuacugacccuu.....   | 7    | 1 | j16 |
| .....cgcCggugcuuacugacccuu.....   | 2    | 1 | j16 |
| .....cgcgggugcuuacugUccuu.....    | 1    | 1 | j16 |
| .....cgcgggugcuuacugacccuC.....   | 17   | 1 | j16 |
| .....cgcUggugcuuacugacccuu.....   | 3    | 1 | j16 |
| .....cgcgggugcuuacuUacccuu.....   | 8    | 1 | j16 |
| .....cgcgggugcuuacugaccAuu.....   | 9    | 1 | j16 |
| .....cgcgggugcuuacugacccuA.....   | 53   | 1 | j16 |
| .....cgcgggugcuGacugacccuu.....   | 2    | 1 | j16 |
| .....cgcgggugcuUcugacccuu.....    | 1    | 1 | j16 |
| .....cgcgggugcuuacugaccAuu.....   | 3    | 1 | j16 |
| .....cgcggCugcuuacugacccuu.....   | 2    | 1 | j16 |
| .....cAcgggugcuuacugacccuu.....   | 3    | 1 | j16 |
| .....cgcgggugcuuacCgacccuu.....   | 3    | 1 | j16 |
| .....cgcgCgugcuuacugacccuu.....   | 2    | 1 | j16 |
| .....cgcgggugUuuacugacccuu.....   | 16   | 1 | j16 |
| .....cgcgggugcuUcugacccuu.....    | 5    | 1 | j16 |
| .....cgcgUgugcuuacugacccuu.....   | 3    | 1 | j16 |
| .....cgcgggUcuuacugacccuu.....    | 2    | 1 | j16 |
| .....cgcgggugcuuUugacccuu.....    | 14   | 1 | j16 |
| .....cgcgggugcuuacuCacccuu.....   | 2    | 1 | j16 |
| .....cgcgggugcuuacugCccuu.....    | 8    | 1 | j16 |
| .....cgcgggugcuuacugGccuu.....    | 2    | 1 | j16 |
| .....cgcAggugcuuacugacccuu.....   | 2    | 1 | j16 |
| .....Gcggggugcuuacugacccuu.....   | 1    | 1 | j16 |
| .....cgUgggugcuuacugacccuu.....   | 6    | 1 | j16 |
| .....cgcgAgugcuuacugacccuu.....   | 4    | 1 | j16 |
| .....cgcgggugGuuacugacccuu.....   | 2    | 1 | j16 |
| .....cgcgggugcuuacugaccUuu.....   | 5    | 1 | j16 |
| .....cgcgggugcuuacugacUcuu.....   | 6    | 1 | j16 |
| .....cgcgggugcuuacugaUccuu.....   | 3    | 1 | j16 |
| .....cgcgggugcuuacugaGccuu.....   | 2    | 1 | j16 |
| .....cgcgggugcuuacugacccuu.....   | 2329 | 0 | j16 |
| .....cgcgggGgcuuacugacccuu.....   | 20   | 1 | j16 |
| .....cgcgggugcuuAaugacccuu.....   | 4    | 1 | j16 |
| .....Agcgggugcuuacugacccuu.....   | 4    | 1 | j16 |
| .....cgcgggCgcuuacugacccuu.....   | 33   | 1 | j16 |
| .....cgcgggugcuacuAacccuu.....    | 3    | 1 | j16 |
| .....cgcgggugcCuacugacccuu.....   | 4    | 1 | j16 |
| .....cgcgggugAuuacugacccuu.....   | 2    | 1 | j16 |
| .....cgcgggugcuuacugaccCu.....    | 2    | 1 | j16 |
| .....cgcgggugcAuuacugacccuu.....  | 1    | 1 | j16 |
| .....cgcgggugcuuacugacccuG.....   | 3    | 1 | j16 |
| .....cgcgggugcuCacugacccuu.....   | 3    | 1 | j16 |
| .....cgcgggugcuuacugaAccuu.....   | 6    | 1 | j16 |
| .....cgcgggugcuUcugacccuu.....    | 1    | 1 | j16 |
| .....cgcgggAgcuuacugacccuu.....   | 45   | 1 | j16 |
| .....cgcgggUcuuacugacccuu.....    | 2    | 1 | j16 |
| .....cgcgggugcuuacugaccAuuu.....  | 2    | 1 | j16 |
| .....cgcgggugcuuacuUacccuuu.....  | 1    | 1 | j16 |
| .....cgcgggGgcuuacugacccuuu.....  | 4    | 1 | j16 |
| .....cgcgggugcuuAaugacccuuu.....  | 2    | 1 | j16 |
| .....cgcgggugcuuacugaAccuuu.....  | 3    | 1 | j16 |
| .....cgcgggugcuUcugacccuu.....    | 2    | 1 | j16 |
| .....cgcgggugcuuacugacccuuA.....  | 7    | 1 | j16 |
| .....cgcgggugcAuuacugacccuuu..... | 1    | 1 | j16 |
| .....cgcgggUAcuuacugacccuuu.....  | 1    | 1 | j16 |
| .....cgcgggugcuuacugacccuuu.....  | 447  | 0 | j16 |
| .....cgcgggCugcuuacugacccuuu..... | 1    | 1 | j16 |
| .....cgcgggugcuGacugacccuuu.....  | 1    | 1 | j16 |
| .....cgcgggAgcuuacugacccuuu.....  | 17   | 1 | j16 |
| .....cgcgggCgcuuacugacccuuu.....  | 8    | 1 | j16 |
| .....cgcgggugUuuacugacccuuu.....  | 3    | 1 | j16 |
| .....cgcgggugcuuacugacccuGu.....  | 1    | 1 | j16 |
| .....cgcgggugcuuacugaccCu.....    | 1    | 1 | j16 |
| .....cgcgggugcuuacugacccuC.....   | 3    | 1 | j16 |
| .....Ugcgggugcuuacugacccuuu.....  | 3    | 1 | j16 |

cuaccgggucggaguuagcucaagcgguuaccuccuacugcgggacuuucuaucuguccaucucugucgggguuucgagaccgcggggucuuacugaccuuuuuag

|                                      |     |   |     |
|--------------------------------------|-----|---|-----|
| .....cgcgggugcuuacugaccuuG....       | 1   | 1 | j16 |
| .....cgcggguuuuacugaccuuu....        | 1   | 1 | j16 |
| .....cgcgggugcuuacugaccuuAu....      | 10  | 1 | j16 |
| .....cgcgggugcuuacugaccuuuu....      | 13  | 0 | j16 |
| .....cgcgggugcuuacugaccuuuA....      | 27  | 1 | j16 |
| .....cgcgggugcuuacugaccuuuuU..       | 1   | 1 | j16 |
| .....cgcgggugcuuacugaccuuuuA.        | 1   | 1 | j16 |
| .....gcgggugcuuacugaccuu....         | 6   | 0 | j16 |
| .....gcgggugcuuacugaccuuu....        | 1   | 0 | j16 |
| .....cgggGgcuuacugaccuu....          | 1   | 1 | j16 |
| .....cgGgugcuuacugaccuu....          | 2   | 1 | j16 |
| .....cgggugcuuacugaccuu....          | 1   | 0 | j16 |
| .....ccgggucggaguuagcucaagcgg....    | 1   | 0 | ku6 |
| .....cgggucggaguuagcucaagcgg....     | 1   | 0 | ku6 |
| .....cgggucggaguuagcuAaagcgg....     | 1   | 1 | ku6 |
| .....cgggGcggaguuagcucaagcgg....     | 1   | 1 | ku6 |
| .....cgggucggaguuagcucGagcgg....     | 1   | 1 | ku6 |
| .....cgggucggaguuagcucaagcgg....     | 18  | 0 | ku6 |
| .....cgggucggaguuagcucaaUcgg....     | 1   | 1 | ku6 |
| .....cgggucggaguuagcucaagcggA....    | 2   | 1 | ku6 |
| .....cgggucggaguuagcucaagcggG....    | 1   | 1 | ku6 |
| .....cgggucggaguuagcucaagcgggu....   | 9   | 0 | ku6 |
| .....cgggGcggaguuagcucaagcgggu....   | 2   | 1 | ku6 |
| .....cgggucggaguuagcucaagcgguu....   | 1   | 0 | ku6 |
| .....gggucggaguuagcucaagcgg....      | 1   | 0 | ku6 |
| .....Cggucggaguuagcucaagcgggu....    | 1   | 1 | ku6 |
| .....gggucggaguuagcucaagcgggu....    | 2   | 0 | ku6 |
| .....gggucggaguuagcucaagcggguA....   | 2   | 1 | ku6 |
| .....ggucggaguuagcucaagcgggu....     | 1   | 0 | ku6 |
| .....cgcgggugcuuacugaccuu....        | 5   | 0 | ku6 |
| .....cgcgggGcguuacugaccuu....        | 1   | 1 | ku6 |
| .....accgggucggaguuagcucaagcgg....   | 1   | 0 | j11 |
| .....cccgggucggaguuagcucaagcgguu.... | 2   | 0 | j11 |
| .....ccgggucggaguuagcucaagcgg....    | 1   | 0 | j11 |
| .....ccgggucggaguuagcucaagcgg....    | 7   | 0 | j11 |
| .....ccgggucggaguuagcucaagcgggu....  | 6   | 0 | j11 |
| .....ccgggucggaguuagcucaagcgggu....  | 1   | 0 | j11 |
| .....ccgggucggaguuagcucaagcgggu....  | 1   | 1 | j11 |
| .....cgggucggaguuagcucaag....        | 2   | 0 | j11 |
| .....cgggucggGcuuagcucaagc....       | 1   | 1 | j11 |
| .....cgggucggaguuCgcucaagc....       | 1   | 1 | j11 |
| .....cgggucggaguuUcuaagc....         | 1   | 1 | j11 |
| .....cgggucggaguuagGuaagc....        | 1   | 1 | j11 |
| .....cgggGcggaguuagcucaagcgg....     | 1   | 1 | j11 |
| .....cgggucggaguuagcucaagcgg....     | 13  | 0 | j11 |
| .....Agggucggaguuagcucaagcgg....     | 1   | 1 | j11 |
| .....cgggucggaguuagcucaagcGU....     | 5   | 1 | j11 |
| .....cgggucggaguuagcucaagAgg....     | 3   | 1 | j11 |
| .....cgggGcggaguuagcucaagcgg....     | 9   | 1 | j11 |
| .....cggguUggaguuagcucaagcgg....     | 3   | 1 | j11 |
| .....Ugggucggaguuagcucaagcgg....     | 1   | 1 | j11 |
| .....cgggucggaguuagcucaagcG.A....    | 8   | 1 | j11 |
| .....cgggucggaguuUcuaagcgg....       | 1   | 1 | j11 |
| .....cgggucggaguuagcucaagcG.C....    | 2   | 1 | j11 |
| .....cgggucggaguuagcucaagcUG....     | 2   | 1 | j11 |
| .....cgggucggaguuagcucaCgcgg....     | 4   | 1 | j11 |
| .....cgggucggaguuGagcucaagcgg....    | 1   | 1 | j11 |
| .....Ggggucggaguuagcucaagcgg....     | 3   | 1 | j11 |
| .....cggguGggaguuagcucaagcgg....     | 1   | 1 | j11 |
| .....cgggucggaCuagcucaagcgg....      | 1   | 1 | j11 |
| .....cggguAaggaguuagcucaagcgg....    | 2   | 1 | j11 |
| .....cgggCcggaguuagcucaagcgg....     | 5   | 1 | j11 |
| .....cgggAcggaguuagcucaagcgg....     | 9   | 1 | j11 |
| .....cgggucggaguuagcucaagcgg....     | 549 | 0 | j11 |
| .....cgggucggaguuagGuaagcgg....      | 1   | 1 | j11 |
| .....cgggucggagGuaagcucaagcgg....    | 8   | 1 | j11 |

cuaccgggucgggaguuagcucaagcgguuaccuccuacugcgggacuuucuaucuguccaucucugugcgggguuucgagaccgcgggugcuuacugaccuuuuuag

|                                        |     |   |     |
|----------------------------------------|-----|---|-----|
| .....cgggucgggaguuagAucaagcgg.....     | 1   | 1 | j11 |
| .....cgggucgggaguuagcucaagUgg.....     | 1   | 1 | j11 |
| .....cgggucggCguuagcucaagcgg.....      | 3   | 1 | j11 |
| .....cgggucgggaguuagcucCagcgg.....     | 2   | 1 | j11 |
| .....cgggucgggaguuagcucaGgcgg.....     | 1   | 1 | j11 |
| .....cgggucgggaguuagcCcaagcgg.....     | 1   | 1 | j11 |
| .....cggAucgggaguuagcucaagcgg.....     | 1   | 1 | j11 |
| .....cgggucgggaguuagcGcaagcgg.....     | 2   | 1 | j11 |
| .....cgggucgggagCuagcucaagcgg.....     | 1   | 1 | j11 |
| .....cgggucgggaguuagcucaagAggu.....    | 1   | 1 | j11 |
| .....cgggucggCguuagcucaagcgg.....      | 1   | 1 | j11 |
| .....cgggCcgaguuagcucaagcgg.....       | 3   | 1 | j11 |
| .....cgggucgggUguuagcucaagcgg.....     | 1   | 1 | j11 |
| .....cgggGcgggaguuagcucaagcgg.....     | 16  | 1 | j11 |
| .....cgggucgggagUGagcucaagcgg.....     | 2   | 1 | j11 |
| .....cgggucgggaguuagcucaaaAcgg.....    | 1   | 1 | j11 |
| .....cggguUgggaguuagcucaagcgg.....     | 2   | 1 | j11 |
| .....cgggucgggaguuagcucaagcggU.....    | 2   | 1 | j11 |
| .....cgggucgggaguuagcucaagcgg.....     | 537 | 0 | j11 |
| .....Agggucgggaguuagcucaagcgg.....     | 3   | 1 | j11 |
| .....cgCgucgggaguuagcucaagcgg.....     | 1   | 1 | j11 |
| .....cgggucgggaguuagcucaagcggC.....    | 1   | 1 | j11 |
| .....cUggucgggaguuagcucaagcgg.....     | 1   | 1 | j11 |
| .....cgggAcgggaguuagcucaagcgg.....     | 3   | 1 | j11 |
| .....cgggucgggaguuagcucaagcggG.....    | 1   | 1 | j11 |
| .....cgggucgggaguuagcuUaagcgg.....     | 1   | 1 | j11 |
| .....cgggucgggaguuagcucaagcggA.....    | 20  | 1 | j11 |
| .....cgggucgggagGuaagcucaagcgg.....    | 3   | 1 | j11 |
| .....cgggucgggaguuagcucUagcgg.....     | 2   | 1 | j11 |
| .....cgggucgggaguuagcuAaagcgg.....     | 3   | 1 | j11 |
| .....cgggucgggaguuagcucaagcgguu.....   | 54  | 0 | j11 |
| .....cgggucgggagCuagcucaagcgguu.....   | 1   | 1 | j11 |
| .....cgggucgggaguuagcucaaUcgguu.....   | 2   | 1 | j11 |
| .....cgggucgggaguuagcucaagAggu.....    | 1   | 1 | j11 |
| .....cgggucgggaguuagcucaagUgguu.....   | 1   | 1 | j11 |
| .....cgggucgggaguuagcucaagcgguC.....   | 1   | 1 | j11 |
| .....cgggucgggUguuagcucaagcgguu.....   | 1   | 1 | j11 |
| .....cgggGcgggaguuagcucaagcgguu.....   | 1   | 1 | j11 |
| .....cgggucgggaguuagcucaagcggua.....   | 22  | 1 | j11 |
| .....cgggucgggagUGagcucaagcgguu.....   | 1   | 1 | j11 |
| .....cgggucgggaguuagcucaagcgguaA.....  | 31  | 1 | j11 |
| .....cgggucgggaguuagcucaagcgguuU.....  | 10  | 1 | j11 |
| .....cgggucgggaguuagcucaagcgguuua..... | 5   | 0 | j11 |
| .....cgggucgggaguuagcucaagcgguaCa..... | 1   | 1 | j11 |
| .....cgggucgggaguuagcucaagcgguuuA..... | 1   | 1 | j11 |
| .....gggucgggaguuagcucaagcgg.....      | 4   | 0 | j11 |
| .....gggucgggaguuagcuAaagcgg.....      | 1   | 1 | j11 |
| .....gggucgggaguuUcuaagcgg.....        | 1   | 1 | j11 |
| .....gggucgggaguuagcucaagcgg.....      | 46  | 0 | j11 |
| .....gggGcgggaguuagcucaagcgg.....      | 2   | 1 | j11 |
| .....gggucgggagGuaagcucaagcgg.....     | 1   | 1 | j11 |
| .....gggucgggaguuagcucaaAcgg.....      | 1   | 1 | j11 |
| .....gggucgggaguuagcucaagcggC.....     | 1   | 1 | j11 |
| .....gggucgggaguuUcuaagcgg.....        | 1   | 1 | j11 |
| .....gggucgggUguuagcucaagcgg.....      | 2   | 1 | j11 |
| .....gggucgggagAuaagcucaagcgg.....     | 1   | 1 | j11 |
| .....gggGcgggaguuagcucaagcgg.....      | 4   | 1 | j11 |
| .....gggucgggaguuagcucaagcggA.....     | 2   | 1 | j11 |
| .....ggguGgggaguuagcucaagcgg.....      | 1   | 1 | j11 |
| .....gggucgggagCuagcucaagcgg.....      | 1   | 1 | j11 |
| .....gggucgggaguuagcucCagcgg.....      | 1   | 1 | j11 |
| .....gggucgggUguuagcucaagcgg.....      | 1   | 1 | j11 |
| .....gggCcgaguuagcucaagcgg.....        | 1   | 1 | j11 |
| .....gggucgggaguuagcucaagcgg.....      | 175 | 0 | j11 |
| .....Uggucgggaguuagcucaagcgg.....      | 2   | 1 | j11 |
| .....gggucgggaguuagUuaagcgg.....       | 1   | 1 | j11 |
| .....gggucgggagUGagcucaagcgg.....      | 1   | 1 | j11 |
| .....gggucgggaguuagcucaagcggCu.....    | 2   | 1 | j11 |
| .....gggucgggaguuagGuaagcgg.....       | 1   | 1 | j11 |

cuaccgggucggaguuagcucaagcgguuaccuccuacugcggacuuucuaucuguccaucucugucgggguuucgagaccgcggggucuuacugaccuuuuuag

|                                       |     |   |     |
|---------------------------------------|-----|---|-----|
| .....gggucggagGuaagcucaagcgggu.....   | 2   | 1 | j11 |
| .....gggucggaguuagcucaagcggCu.....    | 2   | 1 | j11 |
| .....gggucggaguuagcucaagcggCuu.....   | 1   | 1 | j11 |
| .....gggucggaguuagcucaagcggAu.....    | 1   | 1 | j11 |
| .....gggucggaguuagcucaagcggguu.....   | 160 | 0 | j11 |
| .....Aggucggaguuagcucaagcgggu.....    | 1   | 1 | j11 |
| .....gggucggaguuagcucaagcggguA.....   | 4   | 1 | j11 |
| .....gggucggaguuagcucaagcggGu.....    | 1   | 1 | j11 |
| .....gggAcggaguuagcucaagcgggu.....    | 1   | 1 | j11 |
| .....gggucggaguuagcCcaagcgggu.....    | 1   | 1 | j11 |
| .....gggucggagCuagcucaagcgggu.....    | 1   | 1 | j11 |
| .....gggucggaguuCgcucaagcgggu.....    | 1   | 1 | j11 |
| .....gggucggaguuagcGcaagcgggu.....    | 1   | 1 | j11 |
| .....gggGcggaguuagcucaagcgggu.....    | 5   | 1 | j11 |
| .....gggucggaguuagcucaagcggguu.....   | 16  | 0 | j11 |
| .....gggucggaguuagcucaagcggguAa.....  | 6   | 1 | j11 |
| .....gggucggaguuGagcucaagcggguu.....  | 1   | 1 | j11 |
| .....ggguAaggaguuagcucaagcggguu.....  | 1   | 1 | j11 |
| .....gggucggaguuagcucaagcggguuU.....  | 15  | 1 | j11 |
| .....gggucggaguuagcucaagcggguuac..... | 1   | 0 | j11 |
| .....gggCcgaguuagcucaagcggguuac.....  | 1   | 1 | j11 |
| .....gggucggaguuagcucaagcggguuUc..... | 1   | 1 | j11 |
| .....ggucggaguuagcucaCgcggguu.....    | 1   | 1 | j11 |
| .....ggaguuagcucaagcgggu.....         | 2   | 0 | j11 |
| .....uuccaucucugucgugggguucg.....     | 1   | 0 | j11 |
| .....ugucguggguuagagaccgcgggug.....   | 1   | 0 | j11 |
| .....cgcgggAgcuuacugacc.....          | 1   | 1 | j11 |
| .....cgcgggugcuuacugaccuu.....        | 1   | 0 | j11 |
| .....cgcgggugcuuacugaccuu.....        | 12  | 0 | j11 |
| .....cgcgggugcuuacugUccuu.....        | 1   | 1 | j11 |
| .....Ucgggugcuuacugaccuu.....         | 1   | 1 | j11 |
| .....cgcgggugcuuUgaccuu.....          | 1   | 1 | j11 |
| .....cgcgggugcuuacUaccuu.....         | 1   | 1 | j11 |
| .....cgcgggugcuuacugaccuuu.....       | 4   | 0 | j11 |
| .....cgggucggaguuagcucaagcgggu.....   | 2   | 0 | s12 |
| .....accgggucggaguuagc.....           | 1   | 0 | ya3 |
| .....accgggucggaguuagcucaagcgg.....   | 1   | 0 | ya3 |
| .....accgggucggaguuagcucaagcgggu..... | 1   | 0 | ya3 |
| .....accgggucggaguuagcucaagcgggu..... | 1   | 0 | ya3 |
| .....accgggucggaguuagGuaagcgggu.....  | 1   | 0 | ya3 |
| .....cgggucggaguuagcucaagc.....       | 3   | 0 | ya3 |
| .....Ucgggucggaguuagcucaagcgg.....    | 1   | 1 | ya3 |
| .....cgggucggaguuagcucaagcgg.....     | 1   | 0 | ya3 |
| .....cgggucggaguuagcucaagcgggu.....   | 4   | 0 | ya3 |
| .....cgggucggaguuagcucaag.....        | 1   | 0 | ya3 |
| .....cgggucggaguuagcucaagA.....       | 1   | 1 | ya3 |
| .....cgggucggaguuagcucaagc.....       | 9   | 0 | ya3 |
| .....cgggucggaguuagcucaaaUc.....      | 1   | 1 | ya3 |
| .....cgggucggaguuagcucaagcgg.....     | 2   | 0 | ya3 |
| .....cAggucggaguuagcucaagcgg.....     | 1   | 1 | ya3 |
| .....cgggucggaguuagcucaaaUcgg.....    | 1   | 1 | ya3 |
| .....cgggucggaguuagcucaagcUg.....     | 1   | 1 | ya3 |
| .....cgggucggaguuagcucaagcgg.....     | 129 | 0 | ya3 |
| .....cUggucggaguuagcucaagcgg.....     | 1   | 1 | ya3 |
| .....cgggGcggaguuagcucaagcgg.....     | 1   | 1 | ya3 |
| .....cgggucggaguuagcucaagcgggu.....   | 46  | 0 | ya3 |
| .....cgggucggagGuaagcucaagcgggu.....  | 1   | 1 | ya3 |
| .....cgggGcggaguuagcucaagcgggu.....   | 1   | 1 | ya3 |
| .....cgggucggaguuagcucaagcggguA.....  | 2   | 1 | ya3 |
| .....cggAucggaguuagcucaagcgggu.....   | 1   | 1 | ya3 |
| .....Agggucggaguuagcucaagcgggu.....   | 1   | 1 | ya3 |
| .....cggguUggaguuagcucaagcgggu.....   | 1   | 1 | ya3 |
| .....cgggucggaguuagcucaagcgggu.....   | 11  | 0 | ya3 |
| .....cgggucggaguuagcucaagcUguu.....   | 1   | 1 | ya3 |
| .....cgggucggaguuagcucaagcggguuA..... | 1   | 1 | ya3 |
| .....gggucggaguuagcucaag.....         | 3   | 0 | ya3 |
| .....gggucggaguuagcucaagc.....        | 11  | 0 | ya3 |

cuaccgggucggaguuagcucaagcgguuaccuccuacugcggacuucuaucuguccaucucugucgggguuucgagaccgcgggugcuuacugaccuuuuuag

|                                        |     |   |     |
|----------------------------------------|-----|---|-----|
| .....gggGcggaguuagcucaagc.....         | 1   | 1 | ya3 |
| .....gggucggaguuagcucaagcg.....        | 2   | 0 | ya3 |
| .....gggucggaguuUgcucaagcgg.....       | 1   | 1 | ya3 |
| .....gggucggaguuagcucaagcUg.....       | 1   | 1 | ya3 |
| .....gggucggaguuagcuGaaagcgg.....      | 2   | 1 | ya3 |
| .....gggucggaguuagcucaagcgg.....       | 40  | 0 | ya3 |
| .....gggucggaguuagcucaagcggG.....      | 1   | 1 | ya3 |
| .....gggucggaguuagcucaagcgggu.....     | 77  | 0 | ya3 |
| .....gggucAagaguuagcucaagcgggu.....    | 1   | 1 | ya3 |
| .....gggucggGguuagcucaagcgggu.....     | 1   | 1 | ya3 |
| .....gggucggaguuagcucaagcGgu.....      | 1   | 1 | ya3 |
| .....gggucggagGuaagcucaagcgggu.....    | 1   | 1 | ya3 |
| .....gggucggGguuagcucaagcgggu.....     | 1   | 1 | ya3 |
| .....gggucggaguuagcucaagcggCu.....     | 3   | 1 | ya3 |
| .....gggucggaguuagcucaagcgggu.....     | 124 | 0 | ya3 |
| .....gggucgggAuuagcucaagcgggu.....     | 1   | 1 | ya3 |
| .....gggucggaguuagcucaagcggGu.....     | 2   | 1 | ya3 |
| .....gggucggaguuagcucaaUcgggu.....     | 2   | 1 | ya3 |
| .....gggucggaguuagUucaagcgggu.....     | 1   | 1 | ya3 |
| .....gCgucggaguuagcucaagcgggu.....     | 1   | 1 | ya3 |
| .....gggucggaguuagcucaagcggguu.....    | 1   | 0 | ya3 |
| .....gggucggaguuagcucaagcgguuU.....    | 3   | 1 | ya3 |
| .....gggucggaguuagcucaagcgguuac.....   | 1   | 0 | ya3 |
| .....gggucggaguuagcucaagcgguuacc.....  | 1   | 0 | ya3 |
| .....ggucggaguuagcucaagcgggu.....      | 1   | 0 | ya3 |
| .....ggucggaguuagcucaagcgggu.....      | 1   | 0 | ya3 |
| .....gucggaguuagcucaagcgggu.....       | 1   | 0 | ya3 |
| .....ucggaguuagcucaagcgggu.....        | 1   | 0 | ya3 |
| .....ucggaguuagcucaagcgggu.....        | 1   | 0 | ya3 |
| .....ggaguuagcucaagcgggu.....          | 1   | 0 | ya3 |
| .....ggaguuagcucaagcgggu.....          | 7   | 0 | ya3 |
| .....uaccuccuacugcggacuuc.....         | 2   | 0 | ya3 |
| .....cggacuucuaucuguccau.....          | 1   | 0 | ya3 |
| .....cucugucguggguucgagac.....         | 1   | 0 | ya3 |
| .....cugugcuggguucgagac.....           | 1   | 0 | ya3 |
| .....agaccgcgggucuuUc.....             | 1   | 1 | ya3 |
| .....cgcgggugcuuacugacc.....           | 11  | 0 | ya3 |
| .....cgcgggugcuuacugacc.....           | 15  | 0 | ya3 |
| .....cgcgggugcuuacugaccuu.....         | 1   | 0 | ya3 |
| .....cgcgggugcuuacugaccuu.....         | 2   | 0 | ya3 |
| .....cgcgggugcuuacugaccuuuu.....       | 35  | 0 | ya3 |
| .....cgcgggugcuuacugaccuuA.....        | 1   | 1 | ya3 |
| .....cgcggguuUcuuacugaccuuuu.....      | 1   | 1 | ya3 |
| .....cgcgggugcuuacugaGccuuu.....       | 1   | 1 | ya3 |
| .....cgcgggugcuuacugacUcuuu.....       | 1   | 1 | ya3 |
| .....gcgggugcuuacugacc.....            | 1   | 0 | ya3 |
| .....gcggUgcuuacugacc.....             | 1   | 1 | ya3 |
| .....gcgggugcuuacugaccuu.....          | 1   | 0 | ya3 |
| .....gcgggugcuuacugaccuuuu.....        | 1   | 0 | ya3 |
| .....gcgggugcuuacugaccUuuu.....        | 1   | 1 | ya3 |
| .....accgggucggaguuagcucaagcgg.....    | 6   | 0 | la1 |
| .....accgggucgggACuuagcucaagcgggu..... | 1   | 1 | la1 |
| .....accgggucggaguuagcucaagcggA.....   | 1   | 1 | la1 |
| .....accgggucgAaguuagcucaagcgggu.....  | 1   | 1 | la1 |
| .....accgggucggaguuagcucaagcgggu.....  | 10  | 0 | la1 |
| .....accgggucggaguuagcucaagcgggu.....  | 2   | 0 | la1 |
| .....cccGUgucggaguuagcucaagcgg.....    | 1   | 1 | la1 |
| .....Accgggucggaguuagcucaagcgg.....    | 3   | 1 | la1 |
| .....cccgggucggaguuagcucaagcgg.....    | 3   | 0 | la1 |
| .....cccgggucggaguuagcAcaagcgg.....    | 1   | 1 | la1 |
| .....Accgggucggaguuagcucaagcgggu.....  | 7   | 1 | la1 |
| .....cccgggucggaguuagcucaagcggA.....   | 1   | 1 | la1 |
| .....cUcgggucggaguuagcucaagcgggu.....  | 1   | 1 | la1 |
| .....cccgggucggaguuagcucaagcgggu.....  | 10  | 0 | la1 |
| .....Accgggucggaguuagcucaagcgggu.....  | 1   | 1 | la1 |
| .....cccgggucggaguuagcucaagcgggu.....  | 5   | 0 | la1 |
| .....cccgggucggaguuagcucaagcggguG..... | 1   | 1 | la1 |
| .....ccggguUggaguuagcucaagcgg.....     | 1   | 1 | la1 |

cuaccgggucgggaguuagcucaagcgguuaccuccuacugcgggacuuucuaucuguccaucucugucgggguuucgagaccgcgggugcuuacugaccuuuuuag

|                                   |      |   |     |
|-----------------------------------|------|---|-----|
| ...Ucgggucgggaguuagcucaagcgg...   | 2    | 1 | la1 |
| ...ccgUgucgggaguuagcucaagcgg...   | 2    | 1 | la1 |
| ...cgggucggGguuagcucaagcgg...     | 1    | 1 | la1 |
| ...cgggucgggagGuaagcucaagcgg...   | 1    | 1 | la1 |
| ...cgggucggCaguuaagcucaagcgg...   | 1    | 1 | la1 |
| ...cgggCcgaguuagcucaagcgg...      | 1    | 1 | la1 |
| ...cgggucgggaguuagcucaagcggU...   | 1    | 1 | la1 |
| ...cgggucgggaguuagcucaagcgg...    | 2    | 1 | la1 |
| ...ccUggucgggaguuagcucaagcgg...   | 1    | 1 | la1 |
| ...cgggucgggaguuagUucaagcgg...    | 1    | 1 | la1 |
| ...cgggucgggaguuagcucaagcgg...    | 116  | 0 | la1 |
| ...cgggucgggaguuagcucCagcgg...    | 1    | 1 | la1 |
| ...cgggucgggaguuagcucaaUcgg...    | 1    | 1 | la1 |
| ...ccggUucgggaguuagcucaagcgg...   | 1    | 1 | la1 |
| ...Ucgggucgggaguuagcucaagcgg...   | 5    | 1 | la1 |
| ...cgggucgggaguuagcucCagcgg...    | 1    | 1 | la1 |
| ...cgggucgggaguuagcucaagcgg...    | 98   | 0 | la1 |
| ...cgggucgggaguuagcucaGcgg...     | 1    | 1 | la1 |
| ...cgggucgggaguuagcucaagcggA...   | 12   | 1 | la1 |
| ...cgggucgggaguuagcucaagcgg...    | 2    | 1 | la1 |
| ...cUgggucgggaguuagcucaagcgg...   | 1    | 1 | la1 |
| ...cgggucgggaguuagcucaagUgg...    | 1    | 1 | la1 |
| ...cgggucgggaguuagcucaagcgguu...  | 15   | 0 | la1 |
| ...cgggucgggaguuagcucaagcggCu...  | 1    | 1 | la1 |
| ...cgggucgggaguuagcucaagcggUA...  | 5    | 1 | la1 |
| ...cgggucgggaguuagcucaagcggAu...  | 2    | 1 | la1 |
| ...cgggucgggaguuagcucaagcgguuU... | 12   | 1 | la1 |
| ...ccgggucgggaguuagcucaagcgguu... | 1    | 0 | la1 |
| ...cgggucgggaguuagcucaagcgguaA... | 3    | 1 | la1 |
| ...cgggucgggaguuagcucaag...       | 1    | 0 | la1 |
| ...cgggucgggaguuagcucaagc...      | 3    | 0 | la1 |
| ...cgggucgggaguuagcucaagA...      | 1    | 1 | la1 |
| ...cgggucgggaguuagcucaagcgc...    | 14   | 0 | la1 |
| ...cgggucgggaguuagcucaagcA...     | 2    | 1 | la1 |
| ...cgggucgggaguuagUucaagcgc...    | 1    | 1 | la1 |
| ...Agggucgggaguuagcucaagcgg...    | 1    | 1 | la1 |
| ...cgggucgggaguuagcCcaagcgg...    | 1    | 1 | la1 |
| ...cgggucgggaguuagcucaagcgg...    | 1    | 1 | la1 |
| ...cgggucAggaguuagcucaagcgg...    | 1    | 1 | la1 |
| ...Ugggucgggaguuagcucaagcgg...    | 5    | 1 | la1 |
| ...cgggucgggaguuagcAcaagcgg...    | 1    | 1 | la1 |
| ...cgggucgggaguuagcucaagcUg...    | 2    | 1 | la1 |
| ...cCggucgggaguuagcucaagcgg...    | 1    | 1 | la1 |
| ...Ggggucgggaguuagcucaagcgg...    | 3    | 1 | la1 |
| ...cgggucgggaguuagcuUaagcgg...    | 1    | 1 | la1 |
| ...cgggGcgggaguuagcucaagcgg...    | 16   | 1 | la1 |
| ...cgggucgggaguuagcucaagcgg...    | 1481 | 0 | la1 |
| ...cgggucgggaguuagcucaagcgg...    | 1    | 1 | la1 |
| ...cgUgucgggaguuagcucaagcgg...    | 2    | 1 | la1 |
| ...cgggucgUaguuagcucaagcgg...     | 3    | 1 | la1 |
| ...cgggucgggaguuagcucaaUcgg...    | 5    | 1 | la1 |
| ...cggguUggaguuagcucaagcgg...     | 3    | 1 | la1 |
| ...cgggucgggAuuagcucaagcgg...     | 2    | 1 | la1 |
| ...cgggucgggagGuaagcucaagcgg...   | 2    | 1 | la1 |
| ...cgggucgggaguuUucaagcgg...      | 1    | 1 | la1 |
| ...cgggucggGguuagcucaagcgg...     | 1    | 1 | la1 |
| ...cgggucgggaguuagcucUagcgg...    | 1    | 1 | la1 |
| ...cgggCcgaguuagcucaagcgg...      | 1    | 1 | la1 |
| ...cgggucgggagucCagcucaagcgg...   | 1    | 1 | la1 |
| ...cAggucgggaguuagcucaagcgg...    | 1    | 1 | la1 |
| ...cgggucgggagucGagcucaagcgg...   | 1    | 1 | la1 |
| ...cgggucgggaguuagcucaagcggU...   | 5    | 1 | la1 |
| ...cgggucgggaguuagUucaagcgg...    | 3    | 1 | la1 |
| ...cgggucgggaguuagcucaagcGA...    | 1    | 1 | la1 |
| ...cgggucgggAUuuagcucaagcgg...    | 1    | 1 | la1 |
| ...cgggucgggaguuUgcucaagcgg...    | 1    | 1 | la1 |
| ...cgggucgggaguuagcucCagcgg...    | 4    | 1 | la1 |
| ...cggAucgggaguuagcucaagcgg...    | 1    | 1 | la1 |
| ...cggguAaggaguuagcucaagcgg...    | 3    | 1 | la1 |

cuaccgggucgggaguuagcucaagcgguuaccuccuacugcgggacuuucuaucuguccaucucugugcgggguuucgagaccgcgggugcuuacugaccuuuuuag

|                                     |      |   |     |
|-------------------------------------|------|---|-----|
| .....cUggucgggaguuagcucaagcgg.....  | 3    | 1 | la1 |
| .....cgggucgggaguuagcucGagcgg.....  | 1    | 1 | la1 |
| .....cgggucgggaguuagcucaCgcgg.....  | 4    | 1 | la1 |
| .....cgggGcgggaguuagcucaagcgg.....  | 37   | 1 | la1 |
| .....Ugggucgggaguuagcucaagcgg.....  | 17   | 1 | la1 |
| .....cggguUgggaguuagcucaagcgg.....  | 1    | 1 | la1 |
| .....cggCucgggaguuagcucaagcgg.....  | 1    | 1 | la1 |
| .....cgggucgggaguuagcucaaUcgg.....  | 4    | 1 | la1 |
| .....cgggucgggaguuagcucGagcgg.....  | 1    | 1 | la1 |
| .....cgggucgggaguuagcucaagcggC..... | 6    | 1 | la1 |
| .....cgggucgggaguuagUucaagcgg.....  | 3    | 1 | la1 |
| .....cgggucgggaguuagcucaCgcgg.....  | 3    | 1 | la1 |
| .....cgggucgggaguuagcucaagcUgu..... | 1    | 1 | la1 |
| .....cgAgucgggaguuagcucaagcgg.....  | 2    | 1 | la1 |
| .....cgggucgggAuuagcucaagcgg.....   | 1    | 1 | la1 |
| .....cgggucgggGuaagcucaagcgg.....   | 9    | 1 | la1 |
| .....cgggucgggaguuagcuUaagcgg.....  | 4    | 1 | la1 |
| .....cgggCcgaguuagcucaagcgg.....    | 4    | 1 | la1 |
| .....cgCgucgggaguuagcucaagcgg.....  | 2    | 1 | la1 |
| .....Ggggucgggaguuagcucaagcgg.....  | 4    | 1 | la1 |
| .....cgggucgggaguuagcucaagcggA..... | 129  | 1 | la1 |
| .....cgggucgggaguuUcucaagcgg.....   | 7    | 1 | la1 |
| .....cgggucgggaguuCagcucaagcgg..... | 2    | 1 | la1 |
| .....cgggucgCaguuagcucaagcgg.....   | 2    | 1 | la1 |
| .....cgggucgggaguuagcucaagcgg.....  | 3221 | 0 | la1 |
| .....Agggucgggaguuagcucaagcgg.....  | 4    | 1 | la1 |
| .....cgggucgggaguuagAucaagcgg.....  | 2    | 1 | la1 |
| .....cggUucgggaguuagcucaagcgg.....  | 2    | 1 | la1 |
| .....cgggucgggaguuagcucaagcggG..... | 5    | 1 | la1 |
| .....cgggucgggaguuagcucaagcggU..... | 4    | 1 | la1 |
| .....cgggucgggaguuagcucaGgcgg.....  | 2    | 1 | la1 |
| .....cgggucUgaguuagcucaagcgg.....   | 2    | 1 | la1 |
| .....cgggucgggaguuagcuUaagcgg.....  | 6    | 1 | la1 |
| .....cgUgucgggaguuagcucaagcgg.....  | 2    | 1 | la1 |
| .....cgggucgggaguuagcucCagcgg.....  | 3    | 1 | la1 |
| .....cgggucgggaguuagcucaUgcgg.....  | 1    | 1 | la1 |
| .....cgggucgggaguuGagcucaagcgg..... | 3    | 1 | la1 |
| .....cUggucgggaguuagcucaagcgg.....  | 4    | 1 | la1 |
| .....cgggucgggaguuagcucaagUggu..... | 1    | 1 | la1 |
| .....cCggucgggaguuagcucaagcgg.....  | 1    | 1 | la1 |
| .....cgggucgggaguuagcucaagAgg.....  | 2    | 1 | la1 |
| .....cgggucgggaguuagcucaagcCgu..... | 1    | 1 | la1 |
| .....cgggucgggAuuagcucaagcgg.....   | 1    | 1 | la1 |
| .....cggAucgggaguuagcucaagcgg.....  | 1    | 1 | la1 |
| .....cgggucgggaguuUcucaagcgg.....   | 2    | 1 | la1 |
| .....cgggucgggaguuCagcucaagcgg..... | 1    | 1 | la1 |
| .....cgggucgggaguuagcucaagcggA..... | 9    | 1 | la1 |
| .....cgggucgggaguuagcucaaUcgg.....  | 1    | 1 | la1 |
| .....cgggucgAaguuagcucaagcgg.....   | 1    | 1 | la1 |
| .....cgggucgggaguuagcuUaagcgg.....  | 1    | 1 | la1 |
| .....cgggucgggaguuagcucaagcggC..... | 1    | 1 | la1 |
| .....cgggucgggaguuagcucaagcggA..... | 166  | 1 | la1 |
| .....cgggucgggaguuagcucaagcgg.....  | 564  | 0 | la1 |
| .....cgggucgggaguuagcucaUgcgg.....  | 1    | 1 | la1 |
| .....cgggucgggaguuagcucaCgcgg.....  | 3    | 1 | la1 |
| .....cgggucgggaguuGcucuaagcgg.....  | 1    | 1 | la1 |
| .....cgggucgggaguuagcucaagcggG..... | 1    | 1 | la1 |
| .....cgggucgggaguuagcucaagcggC..... | 2    | 1 | la1 |
| .....cgggucgggaguuagcucaagcggG..... | 9    | 1 | la1 |
| .....cgggucgggaguuagcucaagUggu..... | 2    | 1 | la1 |
| .....cgggucgggagGuaagcucaagcgg..... | 2    | 1 | la1 |
| .....cgggGcggaguuagcucaagcgg.....   | 7    | 1 | la1 |
| .....Ggggucgggaguuagcucaagcgg.....  | 2    | 1 | la1 |
| .....cgggCcgaguuagcucaagcgg.....    | 2    | 1 | la1 |
| .....cgggucgggaguuagcucaagcggU..... | 5    | 1 | la1 |
| .....cgggucgggaguuagAucaagcgg.....  | 1    | 1 | la1 |
| .....cgggucgggaguuagcucaCgcgg.....  | 1    | 1 | la1 |
| .....cgggucgggaguuagcucaagcggG..... | 1    | 1 | la1 |
| .....cgggCcgaguuagcucaagcgg.....    | 1    | 1 | la1 |



cuaccgggucgggaguuagcucaagcgguuuaccuccuacugcgggacuuucuaucuguccaucucugucgggguuucgagaccgcggggugcuuacugaccuuuuuug

|                                         |     |   |     |
|-----------------------------------------|-----|---|-----|
| .....cgggucgggaguuagcucaagcgguuU.....   | 229 | 1 | la1 |
| .....cgggGcgggaguuagcucaagcgguuu.....   | 1   | 1 | la1 |
| .....Ggggucgggaguuagcucaagcgguuu.....   | 1   | 1 | la1 |
| .....cgggucgggaguuagcucaagcgguuA.....   | 81  | 1 | la1 |
| .....cgggucgggaguuagcucaagcgguuu.....   | 38  | 0 | la1 |
| .....cgggucgggaguuagcucaagcgguuuU.....  | 29  | 1 | la1 |
| .....cgggucgggaguuagcucaagcgguuuA.....  | 14  | 1 | la1 |
| .....cgggucgggaguuagcucaagcgguuuac..... | 1   | 0 | la1 |
| .....cgggucgggaguuagcucaagcgguuuAa..... | 1   | 1 | la1 |
| .....gggucgggaguuagcucaag.....          | 1   | 0 | la1 |
| .....Cggucgggaguuagcucaagcgg.....       | 2   | 1 | la1 |
| .....gggucggGcuuagcucaagcgg.....        | 1   | 1 | la1 |
| .....gCgucgggaguuagcucaagcgg.....       | 1   | 1 | la1 |
| .....gggGcgggaguuagcucaagcgg.....       | 3   | 1 | la1 |
| .....gggCcgaggaguuagcucaagcgg.....      | 1   | 1 | la1 |
| .....gggucgggaguuagcucaagcgg.....       | 205 | 0 | la1 |
| .....gggucgggaguuagUucaagcgg.....       | 1   | 1 | la1 |
| .....gggucgggaguuagcucaagcgg.....       | 1   | 1 | la1 |
| .....gggucgggaguuUcuaagcgg.....         | 1   | 1 | la1 |
| .....gggucgggaguuagcucaagcggG.....      | 2   | 1 | la1 |
| .....gggucgggaguuagcucaagcglgu.....     | 1   | 1 | la1 |
| .....Uggucgggaguuagcucaagcgg.....       | 2   | 1 | la1 |
| .....gggucgggaguuagcucaagcgg.....       | 498 | 0 | la1 |
| .....gggucgggaguuagUucaagcgg.....       | 1   | 1 | la1 |
| .....gggucgggaguuagcucaaUcgg.....       | 3   | 1 | la1 |
| .....gggucgggaguuagcucaagcggG.....      | 2   | 1 | la1 |
| .....gggGcgggaguuagcucaagcgg.....       | 6   | 1 | la1 |
| .....gggucgggaguuagcucaagcggU.....      | 1   | 1 | la1 |
| .....Aggucgggaguuagcucaagcgg.....       | 1   | 1 | la1 |
| .....gggCcgggaguuagcucaagcgg.....       | 1   | 1 | la1 |
| .....gggucgggaguuagcucaagcggA.....      | 5   | 1 | la1 |
| .....Cggucgggaguuagcucaagcgg.....       | 7   | 1 | la1 |
| .....gggucgggaguuagcGcaagcgg.....       | 1   | 1 | la1 |
| .....gggucgggaguuagcCcaagcgg.....       | 1   | 1 | la1 |
| .....gggucgggaguuagcucGagcgg.....       | 1   | 1 | la1 |
| .....gggucgggaguuagcucaagcggA.....      | 18  | 1 | la1 |
| .....gggucgggaguuagcucaagcgguu.....     | 110 | 0 | la1 |
| .....gggucgggaguuagUucaagcgg.....       | 1   | 1 | la1 |
| .....gggucgggaguuagcucaagcggG.....      | 1   | 1 | la1 |
| .....gggucgggaguuagcucaagcgguu.....     | 1   | 1 | la1 |
| .....gggucgggaguuagcucaagcgguu.....     | 2   | 1 | la1 |
| .....gggucgggaguuagcucaagcgguuA.....    | 9   | 1 | la1 |
| .....gggucgggaguuagcucaagcgguuU.....    | 21  | 1 | la1 |
| .....gggucgggaguuagcucaagcgguuu.....    | 46  | 0 | la1 |
| .....gggucgggaguuagcucaagcgguuuU.....   | 1   | 1 | la1 |
| .....gggucgggaguuagcucaagcgguuuac.....  | 10  | 0 | la1 |
| .....gggucgggaguuagcucaagcgguuuacc..... | 1   | 0 | la1 |
| .....ggucgggaguuagcucaagcgg.....        | 1   | 0 | la1 |
| .....Cgucgggaguuagcucaagcgg.....        | 2   | 1 | la1 |
| .....ggucgggaguuagcucaagcgg.....        | 3   | 0 | la1 |
| .....ucggaguuagcucaagcgg.....           | 2   | 0 | la1 |
| .....cggaguuagcucaagcgg.....            | 3   | 0 | la1 |
| .....cggaguuagcucaagcgg.....            | 2   | 0 | la1 |
| .....guuaccuccuacugccggacuucu.....      | 1   | 0 | la1 |
| .....uaccuccuacugccggacuuu.....         | 1   | 0 | la1 |
| .....uaccuccuacugccggacuucu.....        | 2   | 0 | la1 |
| .....uaccuccuacugccggacuucA.....        | 1   | 1 | la1 |
| .....uaccuccucUgccggacuucu.....         | 1   | 1 | la1 |
| .....accuccuacugccggacuucu.....         | 1   | 0 | la1 |
| .....ccaucucugucgugguuucgagaccg.....    | 1   | 0 | la1 |
| .....caucucugucgugguu.....              | 1   | 0 | la1 |
| .....cugucgugguuucgagac.....            | 1   | 0 | la1 |
| .....gUgguucgagaccgcgg.....             | 1   | 1 | la1 |
| .....ggguucgagaccgcggugcuuacuUacc.....  | 1   | 1 | la1 |
| .....guucgagaccgcggugcuuacug.....       | 1   | 0 | la1 |
| .....agaccgcggugcuuacugaccuu.....       | 1   | 0 | la1 |
| .....cgggugcuuacugacc.....              | 1   | 0 | la1 |
| .....cgccggugcuuacugCcccu.....          | 1   | 1 | la1 |

cuaccgggucggaguuagcucaagcgguuaccuccuacugcgggacuuucuaucuguccaucucugugcgggguuucgagaccgcggggugcuuacugaccuuuuuug

|                                     |    |   |     |
|-------------------------------------|----|---|-----|
| .....cgcgggugcuuacugaccuu.....      | 4  | 0 | la1 |
| .....cgcgggugcuuUugaccuu.....       | 2  | 1 | la1 |
| .....cgcgggugcuuacugaccuu.....      | 98 | 0 | la1 |
| .....cgcgggugcuuacuUaccuu.....      | 1  | 1 | la1 |
| .....cgcgUgugcuuacugaccuu.....      | 1  | 1 | la1 |
| .....cgcgggugcuuacugGccuu.....      | 1  | 1 | la1 |
| .....cgcgggugcuuacugaAccuu.....     | 1  | 1 | la1 |
| .....cgcgggugcuuacugaccuuA.....     | 2  | 1 | la1 |
| .....cgcggguuUcuuacugaccuu.....     | 1  | 1 | la1 |
| .....cgcgggugcuuacugaccuuAu.....    | 1  | 1 | la1 |
| .....cgcgggugcuuacugaccAuuu.....    | 1  | 1 | la1 |
| .....Ugcggugcuuacugaccuuu.....      | 1  | 1 | la1 |
| .....cgcgggugcuuacugaccGuu.....     | 1  | 1 | la1 |
| .....cgcgggugcuuacugaccuuu.....     | 84 | 0 | la1 |
| .....cgcgggugUuuacugaccuuu.....     | 1  | 1 | la1 |
| .....cgcgggugcuuacugaUccuu.....     | 1  | 1 | la1 |
| .....cgcggguCcuuacugaccuuu.....     | 2  | 1 | la1 |
| .....cgcgggugcuuacugaccuuuu.....    | 12 | 0 | la1 |
| .....cgcgggugcuuacugaccuuuA.....    | 9  | 1 | la1 |
| .....cgcgggugcuuacugaccuuuAu.....   | 1  | 1 | la1 |
| .....cgcgggugcuuacugaAccuuuu.....   | 1  | 1 | la1 |
| .....cgcgggugcuuacugaccuuuuU.....   | 1  | 1 | la1 |
| .....cgcgggugcuuacugaccuuuu.....    | 1  | 0 | la1 |
| .....cgggugcuuacugaccuuuu.....      | 1  | 0 | la1 |
| .....                               |    |   |     |
| ..accgggucggaguuagcu.....           | 2  | 0 | j15 |
| ..accgggucggaguuagcucaagc.....      | 1  | 0 | j15 |
| ..accgggucggaguuagcucaagcUg.....    | 1  | 1 | j15 |
| ..accgggucggaguuagcucaagcgg.....    | 1  | 0 | j15 |
| ..accgggucggaguuagcucaagcgggu.....  | 6  | 0 | j15 |
| ..accgggucggaguuagcucaagcgguu.....  | 2  | 0 | j15 |
| ..ccgggucggaguuagcucaag.....        | 1  | 0 | j15 |
| ..Ucgggucggaguuagcucaagc.....       | 2  | 1 | j15 |
| ..Accgggucggaguuagcucaagcgg.....    | 3  | 1 | j15 |
| ..ccgggucggaguuagcucaagcgg.....     | 1  | 0 | j15 |
| ..Accgggucggaguuagcucaagcgggu.....  | 3  | 1 | j15 |
| ..ccgggucggaguuagcucaagcgggu.....   | 3  | 0 | j15 |
| ..Accgggucggaguuagcucaagcgggu.....  | 2  | 1 | j15 |
| ..ccgggucggaguuagcucaagcgggu.....   | 4  | 0 | j15 |
| ..ccgggucggaguuagcucaagcgguuU.....  | 1  | 1 | j15 |
| ..ccgggucggaguuCgcucaag.....        | 1  | 1 | j15 |
| ..ccAggucggaguuagcucaag.....        | 1  | 1 | j15 |
| ..ccgggucggaguuagcucaagc.....       | 4  | 0 | j15 |
| ..ccgggucggaguuagcucaagcA.....      | 3  | 1 | j15 |
| ..ccgggucggaguuagcucaagcgc.....     | 10 | 0 | j15 |
| ..ccgggucggaguuagcucaagcA.....      | 1  | 1 | j15 |
| ..ccgggucggaguuagcucaagcgcA.....    | 2  | 1 | j15 |
| ..ccgggAcgaguuagcucaagcgg.....      | 1  | 1 | j15 |
| ..Ucgggucggaguuagcucaagcgg.....     | 1  | 1 | j15 |
| ..ccgggucggaguuagcucaagcgg.....     | 34 | 0 | j15 |
| ..ccgggucggaguuagcucaagcUg.....     | 2  | 1 | j15 |
| ..ccgggucggaguuagcucaaUcgg.....     | 2  | 1 | j15 |
| ..ccgggucggaguuagcucaagcgcU.....    | 2  | 1 | j15 |
| ..ccgggucggaguuagcuUaagcgg.....     | 1  | 1 | j15 |
| ..ccgggucggaguuagcucaagcgggu.....   | 71 | 0 | j15 |
| ..ccgggucgAaguuagcucaagcgggu.....   | 1  | 1 | j15 |
| ..ccgggucggaguuagcucaagcgggu.....   | 1  | 1 | j15 |
| ..ccgggucggaguuagcucaagcggC.....    | 1  | 1 | j15 |
| ..ccgggucggaguuagcucaagcggA.....    | 1  | 1 | j15 |
| ..ccgggucggGuuagcucaagcgggu.....    | 1  | 1 | j15 |
| ..ccgggucggaguuagcucCagcgggu.....   | 2  | 1 | j15 |
| ..ccgggGcggaguuagcucaagcgggu.....   | 1  | 1 | j15 |
| ..ccgggucggaguuagcucaagcggG.....    | 1  | 1 | j15 |
| ..cUgggucggaguuagcucaagcgggu.....   | 1  | 1 | j15 |
| ..ccgggucggaguuagcucaagUggu.....    | 1  | 1 | j15 |
| ..ccgggucggaguuagcucaagcgggu.....   | 14 | 0 | j15 |
| ..ccgggucggaguuagcucaagcggguA.....  | 3  | 1 | j15 |
| ..ccgggucggaguuagcucaagcggguAa..... | 1  | 1 | j15 |

cuaccgggucggaguuagcucaagcgguuuaccuccuacugcgggacuuucuaucuguccaucucugugcgggguuucgagaccgcggggugcuuacugaccuuuuuag

|                                     |      |   |     |
|-------------------------------------|------|---|-----|
| ...ccgggucggaguuagcucaagcgguuU..... | 5    | 1 | j15 |
| ...cgggCcgaguuagcuca.....           | 1    | 1 | j15 |
| ...cgggGcgaguuagcucaag.....         | 1    | 1 | j15 |
| ...cgggucggaguuUcucaag.....         | 1    | 1 | j15 |
| ...cgggucggaguuagcucaag.....        | 14   | 0 | j15 |
| ...cgggucggaguuagUcucaag.....       | 1    | 1 | j15 |
| ...cgggGcgaguuagcucaagc.....        | 1    | 1 | j15 |
| ...cgggucggagGuaagcucaagc.....      | 1    | 1 | j15 |
| ...cgggucggaguuagcucaagc.....       | 26   | 0 | j15 |
| ...cggguUggaguuagcucaagc.....       | 1    | 1 | j15 |
| ...cgggucggaguuUCucaagc.....        | 1    | 1 | j15 |
| ...cgggucggaguuagcucaagcG.....      | 242  | 0 | j15 |
| ...cgggucggaguuagcucaagGg.....      | 2    | 1 | j15 |
| ...cgggucggaguuagcucaagUg.....      | 1    | 1 | j15 |
| ...cgggGcgaguuagcucaagcG.....       | 6    | 1 | j15 |
| ...cgggucggaguuagcucaagcU.....      | 3    | 1 | j15 |
| ...cgggCcgaguuagcucaagcG.....       | 1    | 1 | j15 |
| ...cgggucggaguuagcucaagAg.....      | 1    | 1 | j15 |
| ...cgggucggaguuUcucaagcG.....       | 1    | 1 | j15 |
| ...AgggucggaguuagcucaagcG.....      | 2    | 1 | j15 |
| ...cgggucggagGuaagcucaagcG.....     | 5    | 1 | j15 |
| ...GgggucggaguuagcucaagcG.....      | 1    | 1 | j15 |
| ...cgggucggagCuuaagcucaagcG.....    | 1    | 1 | j15 |
| ...cgggucggaguuagUcucaagcG.....     | 2    | 1 | j15 |
| ...cgggucggaguuagcuUaagcG.....      | 1    | 1 | j15 |
| ...cgggucggaguuagcucCagcG.....      | 2    | 1 | j15 |
| ...cgggucggaguuagcucaagcA.....      | 2    | 1 | j15 |
| ...cgggucggagCuagcucaagcG.....      | 1    | 1 | j15 |
| ...cgggucggaguuagGuaagcG.....       | 1    | 1 | j15 |
| ...cgggucggaguuagcucaaUcg.....      | 1    | 1 | j15 |
| ...cggguUggaguuagcucaagcG.....      | 1    | 1 | j15 |
| ...cggAucggaguuagcucaagcG.....      | 1    | 1 | j15 |
| ...cgggucggCguuagcucaagcG.....      | 1    | 1 | j15 |
| ...cgggucggaguuagAuaagcG.....       | 2    | 1 | j15 |
| ...cgggucggaguuagcCcaagcG.....      | 2    | 1 | j15 |
| ...AgggucggaguuagcucaagcG.....      | 1    | 1 | j15 |
| ...cgggucggaguuagcucaaCcg.....      | 1    | 1 | j15 |
| ...cgggucggaguuagcucaUgcG.....      | 1    | 1 | j15 |
| ...cgggucggaguuagcucaaUcg.....      | 6    | 1 | j15 |
| ...cgggucggaguuUCucaagcG.....       | 1    | 1 | j15 |
| ...cgggucggaguuAucucaagcG.....      | 1    | 1 | j15 |
| ...cgggucggaguuagcucaagcG.....      | 32   | 1 | j15 |
| ...GgggucggaguuagcucaagcG.....      | 2    | 1 | j15 |
| ...cgggucggaguuagcucaagcG.....      | 1093 | 0 | j15 |
| ...cgggucggaguuagcuAaagcG.....      | 3    | 1 | j15 |
| ...cgggucggaguuagcucaCgcG.....      | 3    | 1 | j15 |
| ...cgggucggagUcagcucaagcG.....      | 3    | 1 | j15 |
| ...cgggucAgaguuagcucaagcG.....      | 2    | 1 | j15 |
| ...UgggucggaguuagcucaagcG.....      | 8    | 1 | j15 |
| ...cgggCcgaguuagcucaagcG.....       | 4    | 1 | j15 |
| ...cgggAcggaguuagcucaagcG.....      | 8    | 1 | j15 |
| ...cggguUggaguuagcucaagcG.....      | 3    | 1 | j15 |
| ...cgggucgAaguuagcucaagcG.....      | 1    | 1 | j15 |
| ...cgggGcgaguuagcucaagcG.....       | 21   | 1 | j15 |
| ...cgggucggaguuagcucaagcUg.....     | 4    | 1 | j15 |
| ...cgggucggagUgagcucaagcG.....      | 1    | 1 | j15 |
| ...cgggucggagGuaagcucaagcG.....     | 7    | 1 | j15 |
| ...cgggucggaguuagcucCagcG.....      | 6    | 1 | j15 |
| ...cgggucggaguuagcucUagcG.....      | 2    | 1 | j15 |
| ...cgggucggaguuagcucaGgcG.....      | 1    | 1 | j15 |
| ...cgggucggUguuagcucaagcG.....      | 1    | 1 | j15 |
| ...cgggucggaguuagcuGaaGcG.....      | 1    | 1 | j15 |
| ...cgggucggaguuUcucaagcG.....       | 6    | 1 | j15 |
| ...cgggucggaguuagcGcaagcG.....      | 2    | 1 | j15 |
| ...cgggucggagAuuagcucaagcG.....     | 2    | 1 | j15 |
| ...cgggucggagAuaagcucaagcG.....     | 3    | 1 | j15 |
| ...cAgggucggaguuagcucaagcG.....     | 2    | 1 | j15 |

cuaccgggucgggaguuagcucaagcgguuaccuccuacugcgggacuuucuaucuguccaucucugugcgggguuucgagaccgcgggugcuuacugaccuuuuuag

|                                     |      |   |     |
|-------------------------------------|------|---|-----|
| .....cgggucggagCuagcucaagcgg.....   | 1    | 1 | j15 |
| .....cgggucggaguuagcucGagcgg.....   | 1    | 1 | j15 |
| .....cgggucggaguuagcGcaagcgg.....   | 3    | 1 | j15 |
| .....cgggucggaguuagcucaGgcgg.....   | 1    | 1 | j15 |
| .....cgggCcgaguuagcucaagcgg.....    | 4    | 1 | j15 |
| .....Ggggucggaguuagcucaagcgg.....   | 8    | 1 | j15 |
| .....cgggucggaguuagcucaagcgg.....   | 6    | 1 | j15 |
| .....cgggucggaguuagGcaagcgg.....    | 1    | 1 | j15 |
| .....cgggucggaguuagcucaagcggA.....  | 45   | 1 | j15 |
| .....cgggucggGuuagcucaagcgg.....    | 1    | 1 | j15 |
| .....Agggucggaguuagcucaagcgg.....   | 1    | 1 | j15 |
| .....cgggucggaguuagcucaagcggC.....  | 21   | 1 | j15 |
| .....cgggucggaguuagcucaagcGau.....  | 1    | 1 | j15 |
| .....cGggucggaguuagcucaagcgg.....   | 1    | 1 | j15 |
| .....cgggucggaguuagcuLaagcgg.....   | 6    | 1 | j15 |
| .....Ugggucggaguuagcucaagcgg.....   | 1    | 1 | j15 |
| .....cgUgucggaguuagcucaagcgg.....   | 1    | 1 | j15 |
| .....cgggucggaguuagcucaagUgg.....   | 4    | 1 | j15 |
| .....cgggucggaguuagcucaaUcgg.....   | 4    | 1 | j15 |
| .....cgggucggaguuagAucaagcgg.....   | 2    | 1 | j15 |
| .....cgggucggaguuagcucaaCcg.....    | 2    | 1 | j15 |
| .....cgggucGlaguuagcucaagcgg.....   | 1    | 1 | j15 |
| .....cgggucggaguuUcuaagcgg.....     | 6    | 1 | j15 |
| .....cgggucggagCuagcucaagcgg.....   | 3    | 1 | j15 |
| .....cgggucgUaguagcucaagcgg.....    | 1    | 1 | j15 |
| .....cgggGcggaguuagcucaagcgg.....   | 35   | 1 | j15 |
| .....cgggucggaguuagcucaagAgg.....   | 1    | 1 | j15 |
| .....cAggucggaguuagcucaagcgg.....   | 2    | 1 | j15 |
| .....cggguUggaguuagcucaagcgg.....   | 4    | 1 | j15 |
| .....cgggucggaguuagcucaagcgg.....   | 1591 | 0 | j15 |
| .....cgggAcggaguuagcucaagcgg.....   | 11   | 1 | j15 |
| .....cgggucggaguuagUcaagcgg.....    | 1    | 1 | j15 |
| .....cgggucggaguuagcuUgcgg.....     | 1    | 1 | j15 |
| .....cgggucggaguuAacucaagcgg.....   | 3    | 1 | j15 |
| .....cgggucggaguuagcucaagcUgu.....  | 7    | 1 | j15 |
| .....cggUcggaguuagcucaagcgg.....    | 1    | 1 | j15 |
| .....cgggucggaguuagcucaCgcgg.....   | 11   | 1 | j15 |
| .....cgggucgCaguagcucaagcgg.....    | 1    | 1 | j15 |
| .....cggguAaggaguuagcucaagcgg.....  | 2    | 1 | j15 |
| .....cgggucggaguuagcucaagcCgu.....  | 1    | 1 | j15 |
| .....cgggucggaguuagcuUaagcgg.....   | 3    | 1 | j15 |
| .....cgggucggagGuaagcucaagcgg.....  | 13   | 1 | j15 |
| .....cgggucggCguagcucaagcgg.....    | 6    | 1 | j15 |
| .....cgCgucggaguuagcucaagcgg.....   | 1    | 1 | j15 |
| .....cgggucggaguuagcucCagcgg.....   | 5    | 1 | j15 |
| .....cgggucggaguuagcCcaagcgg.....   | 1    | 1 | j15 |
| .....cgggucggaguuagcucaagcggG.....  | 9    | 1 | j15 |
| .....cgggucggagGagcucaagcgg.....    | 1    | 1 | j15 |
| .....cgggucggaguuagcucaagcGcu.....  | 2    | 1 | j15 |
| .....cgggucggaguuCgcucaagcgg.....   | 2    | 1 | j15 |
| .....cgggucggaguuagcucaagcGbu.....  | 8    | 1 | j15 |
| .....cgggucggaguuagcucUagcgg.....   | 1    | 1 | j15 |
| .....cgggucggaguuagcucaaAcgg.....   | 1    | 1 | j15 |
| .....cgggucggAuuagcucaagcgg.....    | 1    | 1 | j15 |
| .....cggAucggaguuagcucaagcgg.....   | 5    | 1 | j15 |
| .....cgggucggaCuuagcucaagcgguu..... | 2    | 1 | j15 |
| .....cgggucggaguuagcucaCgcgguu..... | 4    | 1 | j15 |
| .....Ugggucggaguuagcucaagcgguu..... | 1    | 1 | j15 |
| .....cgggCcgaguuagcucaagcgguu.....  | 4    | 1 | j15 |
| .....cgggucggaguuagcCcaagcgguu..... | 1    | 1 | j15 |
| .....cgggucggaguuagcucaagcUguu..... | 3    | 1 | j15 |
| .....cgggucggaguuagcucaagcgguu..... | 395  | 0 | j15 |
| .....cgggAcggaguuagcucaagcgguu..... | 2    | 1 | j15 |
| .....cgggucggaguuagcucaagcggGu..... | 3    | 1 | j15 |
| .....cGggucggaguuagcucaagcgguu..... | 1    | 1 | j15 |
| .....cgggucggaguuagcucaGgcgguu..... | 1    | 1 | j15 |
| .....Agggucggaguuagcucaagcgguu..... | 2    | 1 | j15 |
| .....cgggucggaguuagcucaagAgg.....   | 1    | 1 | j15 |
| .....cgggucggaguuACucaagcgguu.....  | 1    | 1 | j15 |

cuaccgggucgggaguuagcucaagcgguuuaccuccuacugcggacuucuaucuguccaucucugucgggguuucgagaccgcgggugcuuacugaccuuuuuag

|                                       |     |   |     |
|---------------------------------------|-----|---|-----|
| .....Ggggucgggaguuagcucaagcgguu.....  | 1   | 1 | j15 |
| .....cgggucgggaguuagcucaagcgguG.....  | 2   | 1 | j15 |
| .....cgggucgggagUagcucaagcgguu.....   | 1   | 1 | j15 |
| .....cgggucgggagAagcucaagcgguu.....   | 1   | 1 | j15 |
| .....cgggucgggaguuCgcucaagcgguu.....  | 1   | 1 | j15 |
| .....cgggucgggaguuagcucaagcggA.....   | 2   | 1 | j15 |
| .....cgggucgggaguuagcucCagcgguu.....  | 1   | 1 | j15 |
| .....cggCucgggaguuagcucaagcgguu.....  | 1   | 1 | j15 |
| .....cgggucgggaguuagcucaagcggCu.....  | 2   | 1 | j15 |
| .....cgggucgggCguuagcucaagcgguu.....  | 1   | 1 | j15 |
| .....cgggucgggaguuagcucaagcCguu.....  | 2   | 1 | j15 |
| .....cgggucgggaguuagcucaagcGCuu.....  | 1   | 1 | j15 |
| .....cgggucgggaguuagcucGagcgguu.....  | 2   | 1 | j15 |
| .....cgggucgUaguuagcucaagcgguu.....   | 1   | 1 | j15 |
| .....cgggucgggaguuagcucaagcggua.....  | 135 | 1 | j15 |
| .....cgggGcgggaguuagcucaagcgguu.....  | 8   | 1 | j15 |
| .....cgggucgggAuuagcucaagcgguu.....   | 1   | 1 | j15 |
| .....cggAucgggaguuagcucaagcgguu.....  | 1   | 1 | j15 |
| .....cgggucgggaguuagcucaaUcgguu.....  | 1   | 1 | j15 |
| .....cgggucgggGuaagcucaagcgguu.....   | 4   | 1 | j15 |
| .....cgggucgggaguuagcucaagcgguuG..... | 1   | 1 | j15 |
| .....cgggucgggaguuagcuAaagcgguu.....  | 1   | 1 | j15 |
| .....cgggucgggaguuagcucaagcgguaG..... | 1   | 1 | j15 |
| .....cgggucgggaguuagcucaagcgguuU..... | 147 | 1 | j15 |
| .....cgggucgggaguuagcucaagcgguu.....  | 15  | 0 | j15 |
| .....cgggucgggaguuagcucaagcgguaA..... | 81  | 1 | j15 |
| .....cgggucgggaguuagcucaagcgguuC..... | 1   | 1 | j15 |
| .....cgggucgggaguuagcucaagcgguuU..... | 3   | 1 | j15 |
| .....cgggucgggaguuagcucaagcgguuA..... | 5   | 1 | j15 |
| .....gggucgggaguuagcucaagcG.....      | 3   | 0 | j15 |
| .....gggUaggaguuagcucaagcG.....       | 1   | 1 | j15 |
| .....gggUaggaguuagcucaagcG.....       | 1   | 1 | j15 |
| .....gggGcgggaguuagcucaagcG.....      | 2   | 1 | j15 |
| .....gggucgggaguuagcucaagcCG.....     | 1   | 1 | j15 |
| .....gggucgggaguuagcucaagcGA.....     | 1   | 1 | j15 |
| .....gggucgggaguuagcucCagcgg.....     | 1   | 1 | j15 |
| .....gggucgggaguuagcucaagcGU.....     | 2   | 1 | j15 |
| .....gggucgggaguuagcucaagcG.....      | 74  | 0 | j15 |
| .....CggucgggaguuagcucaagcG.....      | 4   | 1 | j15 |
| .....gggucgggaguuagcucaagcA.....      | 1   | 1 | j15 |
| .....gggUaggaguuagcucaagcCG.....      | 1   | 1 | j15 |
| .....gggucgggaguuagcucaagcGU.....     | 3   | 1 | j15 |
| .....gggucgggCguuagcucaagcG.....      | 1   | 1 | j15 |
| .....gggucgCaguuagcucaagcG.....       | 1   | 1 | j15 |
| .....gAgucgggaguuagcucaagcG.....      | 1   | 1 | j15 |
| .....gggAcgggaguuagcucaagcG.....      | 1   | 1 | j15 |
| .....gggucgggaguuagcucaCgCG.....      | 2   | 1 | j15 |
| .....gggucgggaguuagUucaagcG.....      | 1   | 1 | j15 |
| .....gggucgggaguuagcucaagcG.....      | 235 | 0 | j15 |
| .....gggucgggaguuagcucaagcGG.....     | 4   | 1 | j15 |
| .....gggucgggaguuagcucaagcGU.....     | 1   | 1 | j15 |
| .....gggucgggaguuUcucaagcG.....       | 1   | 1 | j15 |
| .....gggucgggaguuagcucaaAcG.....      | 1   | 1 | j15 |
| .....gggucgggaguuagcucaagcGC.....     | 3   | 1 | j15 |
| .....ggUcgggaguuagcucaagcG.....       | 1   | 1 | j15 |
| .....gggucgggaguuagcucaagcGA.....     | 3   | 1 | j15 |
| .....gCucgggaguuagcucaagcG.....       | 1   | 1 | j15 |
| .....gggucgggaguuagcucCagcG.....      | 1   | 1 | j15 |
| .....gggCcgggaguuagcucaagcG.....      | 1   | 1 | j15 |
| .....gggGcgggaguuagcucaagcG.....      | 8   | 1 | j15 |
| .....gggucgggaguuagcCcaagcG.....      | 1   | 1 | j15 |
| .....gggAcgggaguuagcucaagcG.....      | 1   | 1 | j15 |
| .....gggucgggaguuagcucaagcGG.....     | 3   | 1 | j15 |
| .....gggucgggaguuagcucaaUcG.....      | 1   | 1 | j15 |
| .....gggucgggaguuagcucaagcGG.....     | 2   | 1 | j15 |
| .....gggucgggaguuagcucaagcGG.....     | 146 | 0 | j15 |
| .....gggucgggaguuCgcucaagcG.....      | 1   | 1 | j15 |
| .....gggucgggaguuagUucaagcG.....      | 1   | 1 | j15 |

cuaccgggucggaguuagcucaagcgguuuaccuccuacugcgggacuuucuaucuguccaucucugugcgggguuucgagaccgcggggucuuacugaccuuuuuag

|                                      |     |   |     |
|--------------------------------------|-----|---|-----|
| .....gggucggaguuagcucaagcggua.....   | 23  | 1 | j15 |
| .....gggucggaguuagcucaagcgguu.....   | 2   | 1 | j15 |
| .....Cggucggaguuagcucaagcgguu.....   | 2   | 1 | j15 |
| .....gggucggaguuagcucaagcggCu.....   | 2   | 1 | j15 |
| .....gggGcggaguuagcucaagcgguu.....   | 1   | 1 | j15 |
| .....gggucggaguuagcucaagcgguuu.....  | 12  | 0 | j15 |
| .....gggucggaguuagcucaagcgguaA.....  | 9   | 1 | j15 |
| .....gggucggaguuagcucaagcgguuU.....  | 136 | 1 | j15 |
| .....gggucggaguuagcucaagcgguuac..... | 1   | 0 | j15 |
| .....gggucggaguuagcucaagcgguuuA..... | 1   | 1 | j15 |
| .....ggucggaguuagcucaagcgggu.....    | 1   | 0 | j15 |
| .....ggucggaguuagcucaagcggGu.....    | 1   | 1 | j15 |
| .....ggaguuagcucaagcggA.....         | 1   | 1 | j15 |
| .....ggaguuagcucaagcgggu.....        | 11  | 0 | j15 |
| .....ggaguuagcucaagcgguu.....        | 4   | 0 | j15 |
| .....ggaguuagcucaagcggua.....        | 2   | 1 | j15 |
| .....ggaguuagcucaagcgguuU.....       | 3   | 1 | j15 |
| .....ggaguuagcucaagcgguaA.....       | 1   | 1 | j15 |
| .....uaccuccuacugcgggacu.....        | 1   | 0 | j15 |
| .....uaccuccuacugcgggacuuu.....      | 4   | 0 | j15 |
| .....uaccuccucUgcccggacuuu.....      | 1   | 1 | j15 |
| .....uacGuccuacugcgggacuuu.....      | 1   | 1 | j15 |
| .....ccaucucugugcgggguuucga.....     | 1   | 0 | j15 |
| .....cugugcugggguucgaga.....         | 1   | 0 | j15 |
| .....cugugcugggguucgagaUc.....       | 1   | 1 | j15 |
| .....cugugcugggguucgagaU.....        | 1   | 1 | j15 |
| .....cgcgggugcuuacugaAc.....         | 1   | 1 | j15 |
| .....cgcgggugcuuacugacG.....         | 1   | 1 | j15 |
| .....cgcgggugcuuacugacc.....         | 5   | 0 | j15 |
| .....cgcgggugcuuacugaccA.....        | 1   | 1 | j15 |
| .....cgcgggugcuuacugacc.....         | 2   | 0 | j15 |
| .....cgUgggugcuuacugaccuu.....       | 1   | 1 | j15 |
| .....cgcgggugcuuUugaccuu.....        | 3   | 1 | j15 |
| .....cgcgggCgcuuacugaccuu.....       | 1   | 1 | j15 |
| .....cgcgggugcuuacugaccC.....        | 2   | 1 | j15 |
| .....cgAgggugcuuacugaccuu.....       | 1   | 1 | j15 |
| .....cgcggguuAcuuacugaccuu.....      | 1   | 1 | j15 |
| .....cgcggaugcuuacugaccuu.....       | 1   | 1 | j15 |
| .....cgcgggugcuuacugaccuu.....       | 153 | 0 | j15 |
| .....cgcgggugcuuacuAaccuu.....       | 1   | 1 | j15 |
| .....cgcgggugcuuacugaccUu.....       | 1   | 1 | j15 |
| .....Ugcgggugcuuacugaccuu.....       | 1   | 1 | j15 |
| .....cgcgggAgcuuacugaccuu.....       | 5   | 1 | j15 |
| .....cgcgggugcuuUcugaccuu.....       | 1   | 1 | j15 |
| .....cCcgggugcuuacugaccuu.....       | 3   | 1 | j15 |
| .....cgcgggugAuuacugaccuu.....       | 1   | 1 | j15 |
| .....cgcgggugcuuAugaccuu.....        | 2   | 1 | j15 |
| .....cgcgggugcuuacugaAccu.....       | 1   | 1 | j15 |
| .....cgcgAgugcuuacugaccuu.....       | 1   | 1 | j15 |
| .....cgcgggugcuuacugaccuuA.....      | 41  | 1 | j15 |
| .....cgcgggugcuuacuCaccuu.....       | 5   | 1 | j15 |
| .....cgcgggugcuuacugaccA.....        | 1   | 1 | j15 |
| .....cgcgggugcuuacugaAccuu.....      | 6   | 1 | j15 |
| .....cgGgggugcuuacugaccuu.....       | 1   | 1 | j15 |
| .....cgcgggugcuuAacugaccuu.....      | 1   | 1 | j15 |
| .....cgcgggugcuuGugaccuu.....        | 1   | 1 | j15 |
| .....cgcgggUcuuacugaccuu.....        | 9   | 1 | j15 |
| .....cgcgggugcuuacCgaccuu.....       | 1   | 1 | j15 |
| .....cgcgggugcuuacugacUcuu.....      | 4   | 1 | j15 |
| .....cgcgggugcuuacugaccC.....        | 1   | 1 | j15 |
| .....cgcgggugcuuacugaccG.....        | 4   | 1 | j15 |
| .....cgcgggugcuuacugaccUuu.....      | 3   | 1 | j15 |
| .....cCcgggugcuuacugaccuu.....       | 1   | 1 | j15 |
| .....cgcgggugcuuacugaUcuu.....       | 2   | 1 | j15 |
| .....cgcgggGgcuuacugaccuu.....       | 9   | 1 | j15 |
| .....cgcgggugcuuacugaccAuu.....      | 5   | 1 | j15 |
| .....cgcgggugcuuUcugaccuu.....       | 1   | 1 | j15 |
| .....cgcgggugcuuUugaccuu.....        | 12  | 1 | j15 |
| .....cgcgggugAuuacugaccuu.....       | 3   | 1 | j15 |

cuaccgggucggaguuagcucaagcgguuaccuccuacugcgggacuuuauucuguccaucucugcgggguuucgagaccgcggggucuuacugacccuuuaug

|                                  |      |   |     |
|----------------------------------|------|---|-----|
| .....cgcgggugcuuacuUaccuu.....   | 9    | 1 | j15 |
| .....cAcgggugcuuacugacccuu.....  | 3    | 1 | j15 |
| .....cgcgggugcuGacugacccuu.....  | 1    | 1 | j15 |
| .....cgcgggugUuuacugacccuu.....  | 5    | 1 | j15 |
| .....Agcgggugcuuacugacccuu.....  | 1    | 1 | j15 |
| .....cgAgggugcuuacugacccuu.....  | 1    | 1 | j15 |
| .....cgcgggugcuuacugacccuG.....  | 1    | 1 | j15 |
| .....cgcgggugcuuacugacccuA.....  | 2    | 1 | j15 |
| .....cgcgggugcAucugacccuu.....   | 2    | 1 | j15 |
| .....cgcgggugcuuacugGccuu.....   | 1    | 1 | j15 |
| .....cgcgggugcuuacugGccuu.....   | 1    | 1 | j15 |
| .....cgcgggugcuuacuAaccuu.....   | 2    | 1 | j15 |
| .....cgcgCugcuuacugacccuu.....   | 1    | 1 | j15 |
| .....cgcgggAgcuuacugacccuu.....  | 35   | 1 | j15 |
| .....cgcgggugcuuacugUccuu.....   | 1    | 1 | j15 |
| .....cgUgggugcuuacugacccuu.....  | 6    | 1 | j15 |
| .....cgcgggugcuCacugacccuu.....  | 4    | 1 | j15 |
| .....cgcgUgugcuuacugacccuu.....  | 1    | 1 | j15 |
| .....cgcgCgugcuuacugacccuu.....  | 1    | 1 | j15 |
| .....cgCaggugcuuacugacccuu.....  | 2    | 1 | j15 |
| .....cgcgggugcCucugacccuu.....   | 1    | 1 | j15 |
| .....cgcgggugcuuacugCccuu.....   | 5    | 1 | j15 |
| .....Ugcgggugcuuacugacccuu.....  | 6    | 1 | j15 |
| .....cgcgggugcuuAaugacccuu.....  | 1    | 1 | j15 |
| .....cgcgggugcuuacugacGcu.....   | 1    | 1 | j15 |
| .....cgcgggCgcuuacugacccuu.....  | 26   | 1 | j15 |
| .....cgcgggugcuuacugacccuu.....  | 1617 | 0 | j15 |
| .....cgcgggugcuuacugaccAuu.....  | 1    | 1 | j15 |
| .....cgcgggugcuuacuAaccuu.....   | 2    | 1 | j15 |
| .....cCcgggugcuuacugacccuu.....  | 1    | 1 | j15 |
| .....cgcgggugcuuAaugacccuu.....  | 2    | 1 | j15 |
| .....cgcgggugcuuacugaccGuu.....  | 1    | 1 | j15 |
| .....cgcgggugcuuCugacccuu.....   | 1    | 1 | j15 |
| .....cgcgggAgcuuacugacccuu.....  | 13   | 1 | j15 |
| .....cgcgggugcuuacugaccUuu.....  | 3    | 1 | j15 |
| .....Ugcgggugcuuacugacccuu.....  | 1    | 1 | j15 |
| .....cgcgggugcuuUugacccuu.....   | 1    | 1 | j15 |
| .....cgcgCgugcuuacugacccuu.....  | 2    | 1 | j15 |
| .....cgcggguCuuacugacccuu.....   | 1    | 1 | j15 |
| .....Agcgggugcuuacugacccuu.....  | 1    | 1 | j15 |
| .....cgcgggugcGucugacccuu.....   | 2    | 1 | j15 |
| .....cgcgggugcuuacugaccuCu.....  | 1    | 1 | j15 |
| .....cgcgggugUuuacugacccuu.....  | 2    | 1 | j15 |
| .....cgAgggugcuuacugacccuu.....  | 2    | 1 | j15 |
| .....cgcgggCgcuuacugacccuu.....  | 8    | 1 | j15 |
| .....cgcgggugcuuacugacUcu.....   | 1    | 1 | j15 |
| .....cgcgggGgcuuacugacccuu.....  | 5    | 1 | j15 |
| .....cgcgUgcuuacugacccuu.....    | 1    | 1 | j15 |
| .....cgcgggugcuuacCgacccuu.....  | 1    | 1 | j15 |
| .....cgcgggugcuuacugacccuA.....  | 8    | 1 | j15 |
| .....cgcgggugcuuacugacccuu.....  | 418  | 0 | j15 |
| .....cgcgggugcuCacugacccuu.....  | 1    | 1 | j15 |
| .....cgcgggugcuuacugacccuu.....  | 2    | 1 | j15 |
| .....cgcgggugcuuacugacccuA.....  | 1    | 1 | j15 |
| .....cgcgggugcuuacugacccuC.....  | 1    | 1 | j15 |
| .....cgcgggugcCucugacccuu.....   | 1    | 1 | j15 |
| .....cgcgggUcuuacugacccuu.....   | 2    | 1 | j15 |
| .....cgcgggugcuuacugacccuuG..... | 1    | 1 | j15 |
| .....cgcgggugcuuacugacccuuu..... | 9    | 0 | j15 |
| .....cgcgggugcuuacugacccuuA..... | 18   | 1 | j15 |
| .....cgcgggugcuuacugacccuuA..... | 1    | 1 | j15 |
| .....gCgggugcuuacugacccuu.....   | 6    | 0 | j15 |
| .....gCgggGgcuuacugacccuu.....   | 1    | 1 | j15 |
| .....gCgggugcuuacugacccuu.....   | 2    | 0 | j15 |
| ..accgggucggaguuagcu.....        | 1    | 0 | j17 |
| ..accgggucggaguuagcucaag.....    | 1    | 0 | j17 |
| ..accgggucggagAagcucaag.....     | 1    | 1 | j17 |
| ..accgggucggaguuagcucaagcgg..... | 2    | 0 | j17 |

cuaccgggucggaguuagcucaagcgguuaccuccuacugcggacuuucuaucuguccaucucugucgggguuucgagaccgcgggugcuuacugaccuuuuuag

|                                              |     |   |     |
|----------------------------------------------|-----|---|-----|
| . . aAccgggucggaguuagcucaagcgggu . . . . .   | 1   | 1 | j17 |
| . . accgggucggaguuagcucaagcgggu . . . . .    | 3   | 0 | j17 |
| . . ccgggucggaguuagcucaagU . . . . .         | 1   | 1 | j17 |
| . . cccgggucggaguuagcucaagc . . . . .        | 2   | 0 | j17 |
| . . . Accgggucggaguuagcucaagc . . . . .      | 2   | 1 | j17 |
| . . . ccgggucggaguuagcucaagcg . . . . .      | 2   | 0 | j17 |
| . . . Accgggucggaguuagcucaagcgg . . . . .    | 1   | 1 | j17 |
| . . . ccgggucggaguuagcucaagcgg . . . . .     | 5   | 0 | j17 |
| . . . cccgggGcggaguuagcucaagcgggu . . . . .  | 1   | 1 | j17 |
| . . . ccgggucggaguuagcucaagcgggu . . . . .   | 2   | 0 | j17 |
| . . . Accgggucggaguuagcucaagcgggu . . . . .  | 3   | 1 | j17 |
| . . . ccgggucggaguuagcucUag . . . . .        | 1   | 1 | j17 |
| . . . ccgggucggaguuagcucaag . . . . .        | 2   | 0 | j17 |
| . . . ccgggucggaguuagcucaagc . . . . .       | 7   | 0 | j17 |
| . . . ccgggucggaguuagUucaagcg . . . . .      | 2   | 1 | j17 |
| . . . cAgggucggaguuagcucaagcg . . . . .      | 1   | 1 | j17 |
| . . . ccgggucggUguuagcucaagcg . . . . .      | 1   | 1 | j17 |
| . . . ccgggAcggaguuagcucaagcg . . . . .      | 1   | 1 | j17 |
| . . . ccgggucggaguuagcucaagcg . . . . .      | 44  | 0 | j17 |
| . . . ccgggucggaguuagcucaaUcg . . . . .      | 1   | 1 | j17 |
| . . . ccgggCcggaguuagcucaagcgg . . . . .     | 4   | 1 | j17 |
| . . . ccgggucggaguuagcucaagcgg . . . . .     | 1   | 1 | j17 |
| . . . Accgggucggaguuagcucaagcgg . . . . .    | 1   | 1 | j17 |
| . . . ccgggucggCguuagcucaagcgg . . . . .     | 1   | 1 | j17 |
| . . . cAgggucggaguuagcucaagcgg . . . . .     | 3   | 1 | j17 |
| . . . ccgggucggaguuUcucaagcgg . . . . .      | 1   | 1 | j17 |
| . . . ccgggucgCaguagcucaagcgg . . . . .      | 1   | 1 | j17 |
| . . . ccgggucggaguuagcucaaUcgg . . . . .     | 1   | 1 | j17 |
| . . . ccgggGcggaguuagcucaagcgg . . . . .     | 2   | 1 | j17 |
| . . . ccgggucggaguuagcucaagcgg . . . . .     | 302 | 0 | j17 |
| . . . ccgggucggaguuagcucaagGgg . . . . .     | 1   | 1 | j17 |
| . . . Ucgggucggaguuagcucaagcgg . . . . .     | 2   | 1 | j17 |
| . . . ccgggucggaguuagcucaagcgC . . . . .     | 1   | 1 | j17 |
| . . . ccgggucggaguuagUucaagcgg . . . . .     | 1   | 1 | j17 |
| . . . ccgggucggaguuagcucGagcgg . . . . .     | 2   | 1 | j17 |
| . . . ccgggucggaguuagcucUagcgg . . . . .     | 2   | 1 | j17 |
| . . . ccgggucggagCuagcucaagcgg . . . . .     | 2   | 1 | j17 |
| . . . ccgggucggaguuagcCcaagcgg . . . . .     | 1   | 1 | j17 |
| . . . ccgggucggaguuagcucaagcAg . . . . .     | 1   | 1 | j17 |
| . . . ccgggucggaguuagcucaagAgg . . . . .     | 2   | 1 | j17 |
| . . . ccgggAcggaguuagcucaagcgg . . . . .     | 4   | 1 | j17 |
| . . . ccgggucggaguuagcucaagcgU . . . . .     | 2   | 1 | j17 |
| . . . ccgggucggaguuagcuUaagcgg . . . . .     | 1   | 1 | j17 |
| . . . ccgggucggaguuagcucaagcgA . . . . .     | 4   | 1 | j17 |
| . . . ccgggucggaguuagcuUaagcgggu . . . . .   | 1   | 1 | j17 |
| . . . ccgggucggaguuagcucaagcUgu . . . . .    | 1   | 1 | j17 |
| . . . ccgggucggaguuagcucaagcggC . . . . .    | 2   | 1 | j17 |
| . . . ccgggucggaguuagcucaagcggA . . . . .    | 2   | 1 | j17 |
| . . . Accgggucggaguuagcucaagcgggu . . . . .  | 2   | 1 | j17 |
| . . . ccgggucggaguuagcucaCgcgggu . . . . .   | 1   | 1 | j17 |
| . . . Ucgggucggaguuagcucaagcgggu . . . . .   | 2   | 1 | j17 |
| . . . ccgggAcggaguuagcucaagcgggu . . . . .   | 2   | 1 | j17 |
| . . . ccgggucggaguuagcucaGgcgggu . . . . .   | 1   | 1 | j17 |
| . . . ccgggucggaguuagcucaAaagcgggu . . . . . | 1   | 1 | j17 |
| . . . ccgggucggaguuagcucaUcgggu . . . . .    | 1   | 1 | j17 |
| . . . ccgggucggaguuagcucaUcggu . . . . .     | 1   | 1 | j17 |
| . . . ccgggucggaguuagcucaagAggu . . . . .    | 1   | 1 | j17 |
| . . . ccgggucggaguuagcucaUcggu . . . . .     | 1   | 1 | j17 |
| . . . ccgggucggaguuagcucaagcgggu . . . . .   | 233 | 0 | j17 |
| . . . ccgggucggaguuagcucaaCcggu . . . . .    | 1   | 1 | j17 |
| . . . ccgggucggaguuagcucaagcgggu . . . . .   | 16  | 0 | j17 |
| . . . ccgggucggaguuagcucaagcggguA . . . . .  | 8   | 1 | j17 |
| . . . ccgggucggaguuagcucaagcggguAa . . . . . | 8   | 1 | j17 |
| . . . ccgggucggaguuagcucaagcggguAa . . . . . | 1   | 1 | j17 |
| . . . ccgggucggaguuagcucaagcggguAa . . . . . | 1   | 1 | j17 |
| . . . ccgggGcggaguuagcucaag . . . . .        | 1   | 1 | j17 |
| . . . ccgggUggaguuagcucaag . . . . .         | 1   | 1 | j17 |



cuaccgggucgggaguuagcucaagcgguuaccuccuacugcgggacuuucuaucuguccaucucugucgggguuucgagaccgcggggugcuuacugaccuuuuuag

|                                       |      |   |     |
|---------------------------------------|------|---|-----|
| .....cgggucgggaguuagUucaag.....       | 2    | 1 | j17 |
| .....cgggucgggaguuUcucaag.....        | 1    | 1 | j17 |
| .....cgggucgggaguuagcucaag.....       | 26   | 0 | j17 |
| .....cgggucgggaguuagcuUaagc.....      | 1    | 1 | j17 |
| .....cgggucgggaguuagUucaagc.....      | 1    | 1 | j17 |
| .....cgggucgggaguuagcucaagU.....      | 1    | 1 | j17 |
| .....cgggucgggaguuagcucaagc.....      | 38   | 0 | j17 |
| .....cgggucgggaguuagcucaagA.....      | 3    | 1 | j17 |
| .....cgggAcgggaguuagcucaagc.....      | 1    | 1 | j17 |
| .....cgggGcgggaguuagcucaagc.....      | 1    | 1 | j17 |
| .....cgggucgggagCuagcucaagc.....      | 1    | 1 | j17 |
| .....cgggucgggaguuagcucaaUc.....      | 1    | 1 | j17 |
| .....cgggucgggaguuagcucaCgc.....      | 1    | 1 | j17 |
| .....cgggucgggaguuAacucaagcgc.....    | 1    | 1 | j17 |
| .....cgUgucgggaguuagcucaagcgc.....    | 1    | 1 | j17 |
| .....cgggucgggaguuagcucaaUcg.....     | 1    | 1 | j17 |
| .....cgggucgggagUcagcucaagcgc.....    | 1    | 1 | j17 |
| .....cgggucgggaguuUcucaagcgc.....     | 1    | 1 | j17 |
| .....cgggucgggaguuagcucaagcA.....     | 4    | 1 | j17 |
| .....cAggucgggaguuagcucaagcgc.....    | 1    | 1 | j17 |
| .....cgggucgggaguuagcucaagAg.....     | 1    | 1 | j17 |
| .....cgggucgggaguuagcucaagcgc.....    | 232  | 0 | j17 |
| .....cgggucgggagGuaagcucaagcgc.....   | 1    | 1 | j17 |
| .....cgggAcgggaguuagcucaagcgc.....    | 3    | 1 | j17 |
| .....cggguAaggaguuagcucaagcgc.....    | 2    | 1 | j17 |
| .....cgggCcgaguuagcucaagcgc.....      | 3    | 1 | j17 |
| .....cggCucgggaguuagcucaagcgc.....    | 1    | 1 | j17 |
| .....Agggucgggaguuagcucaagcgc.....    | 2    | 1 | j17 |
| .....cgggucgggaguuagcuAaagcgc.....    | 1    | 1 | j17 |
| .....cUggucgggaguuagcucaagcgc.....    | 1    | 1 | j17 |
| .....cgggucgggaguuagUucaagcgc.....    | 4    | 1 | j17 |
| .....cggguGggaguuagcucaagcgc.....     | 1    | 1 | j17 |
| .....Ugggucgggaguuagcucaagcgc.....    | 3    | 1 | j17 |
| .....cgggGcgggaguuagcucaagcgc.....    | 5    | 1 | j17 |
| .....cgggCcgaguuagcucaagcgcgc.....    | 32   | 1 | j17 |
| .....cgggAcgggaguuagcucaagcgcgc.....  | 25   | 1 | j17 |
| .....cgggucgggaguuagUucaagcgcgc.....  | 28   | 1 | j17 |
| .....cgggucUgaguuagcucaagcgcgc.....   | 1    | 1 | j17 |
| .....cgggucgggagUgagcucaagcgcgc.....  | 2    | 1 | j17 |
| .....cgggucgggaguuagcucaagcgcgc.....  | 4557 | 0 | j17 |
| .....Ggggucgggaguuagcucaagcgcgc.....  | 8    | 1 | j17 |
| .....cgggucgggaguuagcucaagUgg.....    | 4    | 1 | j17 |
| .....cgggucgggaguuagcucaagcUg.....    | 11   | 1 | j17 |
| .....cgggucgggaguuagcucaagcAg.....    | 22   | 1 | j17 |
| .....cgggucgggaguuagcuGaagcgcgc.....  | 2    | 1 | j17 |
| .....cgggucCgaguuagcucaagcgcgc.....   | 1    | 1 | j17 |
| .....cAggucgggaguuagcucaagcgcgc.....  | 4    | 1 | j17 |
| .....cgggucgggaguuCgcucaagcgcgc.....  | 3    | 1 | j17 |
| .....cgggucgggaguuagcuAaagcgcgc.....  | 9    | 1 | j17 |
| .....cUggucgggaguuagcucaagcgcgc.....  | 3    | 1 | j17 |
| .....cgggucgAguuagcucaagcgcgc.....    | 5    | 1 | j17 |
| .....cggguAaggaguuagcucaagcgcgc.....  | 6    | 1 | j17 |
| .....cgggucgggAuuagcucaagcgcgc.....   | 2    | 1 | j17 |
| .....cgggucgggaguuagcucaagGgg.....    | 1    | 1 | j17 |
| .....cgggGcgggaguuagcucaagcgcgc.....  | 75   | 1 | j17 |
| .....cCggucgggaguuagcucaagcgcgc.....  | 2    | 1 | j17 |
| .....cgggucgggaguuAacucaagcgcgc.....  | 1    | 1 | j17 |
| .....cgggucgggaguuagcucaCgcgcgc.....  | 15   | 1 | j17 |
| .....cgggucgggAUuagcucaagcgcgc.....   | 4    | 1 | j17 |
| .....cggUucgggaguuagcucaagcgcgc.....  | 1    | 1 | j17 |
| .....cgggucgggaguuagcucaaCgcgc.....   | 3    | 1 | j17 |
| .....cgggucgggaguuagcucaagcgcA.....   | 26   | 1 | j17 |
| .....Agggucgggaguuagcucaagcgcgc.....  | 13   | 1 | j17 |
| .....cgggucgggAuaagcucaagcgcgc.....   | 7    | 1 | j17 |
| .....cgggucggGuuagcucaagcgcgc.....    | 18   | 1 | j17 |
| .....cggAucgggaguuagcucaagcgcgc.....  | 4    | 1 | j17 |
| .....cggCucgggaguuagcucaagcgcgc.....  | 1    | 1 | j17 |
| .....cgggucgggagGuaagcucaagcgcgc..... | 17   | 1 | j17 |
| .....cgggucgggaguuagAuaagcgcgc.....   | 15   | 1 | j17 |

cuaccgggucgggaguuagcucaagcgguuaccuccuacugcgggacuuucuaucuguccaucucugugcgggguuucgagaccgcgggugcuuacugaccuuuuuag

|                                       |     |   |     |
|---------------------------------------|-----|---|-----|
| .....cgggucggGguuagcucaagcgg.....     | 7   | 1 | j17 |
| .....cgggucgggaguuagcAcaagcgg.....    | 4   | 1 | j17 |
| .....cgggucgggaguuagcucaaaAcgg.....   | 3   | 1 | j17 |
| .....cgggucgggaguuagcCcaagcgg.....    | 3   | 1 | j17 |
| .....cgggucgggaguuagcucGagcgg.....    | 1   | 1 | j17 |
| .....cgggucgggaguuagcucCagcgg.....    | 7   | 1 | j17 |
| .....cgggucgggaguuagcucaagcggU.....   | 27  | 1 | j17 |
| .....cgggucgggaguuagGuaagcgg.....     | 1   | 1 | j17 |
| .....cgggucgggagCuagcucaagcgg.....    | 8   | 1 | j17 |
| .....cgggucgggaguuagcucaagcCg.....    | 9   | 1 | j17 |
| .....cgggucgggaguuagcucaagAgg.....    | 12  | 1 | j17 |
| .....cgAgucgggaguuagcucaagcgg.....    | 1   | 1 | j17 |
| .....cgggucgggaguuagcucaGgcgg.....    | 4   | 1 | j17 |
| .....cgggucgggaguuagcucaagcggC.....   | 4   | 1 | j17 |
| .....Ugggucgggaguuagcucaagcgg.....    | 18  | 1 | j17 |
| .....cgggucgggUguuagcucaagcgg.....    | 7   | 1 | j17 |
| .....cgggucgggaguuagcuUaagcgg.....    | 12  | 1 | j17 |
| .....cgggucgggagCuagcucaagcgg.....    | 12  | 1 | j17 |
| .....cgggucgggaguuagcucaaUcgg.....    | 15  | 1 | j17 |
| .....cgggucgCaguuaagcucaagcgg.....    | 1   | 1 | j17 |
| .....cgggucgggaguuagcucUagcgg.....    | 7   | 1 | j17 |
| .....cgggucgggaguuagcucaUgcgg.....    | 1   | 1 | j17 |
| .....cgggucgggaguuUcuaagcgg.....      | 15  | 1 | j17 |
| .....cgggucgggaguuagcGaaagcgg.....    | 2   | 1 | j17 |
| .....cggguUggaguuagcucaagcgg.....     | 4   | 1 | j17 |
| .....Agggucgggaguuagcucaagcgggu.....  | 26  | 1 | j17 |
| .....cgggucgggaguuagcuUaaagcgggu..... | 10  | 1 | j17 |
| .....Ggggucgggaguuagcucaagcgggu.....  | 5   | 1 | j17 |
| .....cgggucgggaguuagcucCagcgggu.....  | 10  | 1 | j17 |
| .....cgggCcgaguuagcucaagcgggu.....    | 45  | 1 | j17 |
| .....cgggucgggGguuagcucaagcgggu.....  | 11  | 1 | j17 |
| .....cgggGcggaguuagcucaagcgggu.....   | 125 | 1 | j17 |
| .....cggUucggaguuagcucaagcgggu.....   | 2   | 1 | j17 |
| .....cgggucgggaguuagcucaagcgggA.....  | 141 | 1 | j17 |
| .....cgggucgggaguuagcucaagcgggG.....  | 13  | 1 | j17 |
| .....cgggucgggaguuagcuGaaagcgggu..... | 1   | 1 | j17 |
| .....cgggucgggaguuagLucaagcgggu.....  | 27  | 1 | j17 |
| .....cgggucgggaguuagcucaagcUgu.....   | 23  | 1 | j17 |
| .....cggguGggaguuagcucaagcgggu.....   | 3   | 1 | j17 |
| .....cgggucgggaguuagUucaagcgggu.....  | 30  | 1 | j17 |
| .....cgggucgggaguuagcucaagcggUu.....  | 20  | 1 | j17 |
| .....cgggucgggaguuagcucaGgcgggu.....  | 2   | 1 | j17 |
| .....cgggucgggaguuagcucaUgcgggu.....  | 6   | 1 | j17 |
| .....cgggucgggaguuagcuAaagcgggu.....  | 16  | 1 | j17 |
| .....cgggucgggaguuagcucaaUcgggu.....  | 22  | 1 | j17 |
| .....cgggucgggUguuagcucaagcgggu.....  | 5   | 1 | j17 |
| .....cgggucAgaguuagcucaagcgggu.....   | 6   | 1 | j17 |
| .....cgggucgggaguuagcucaagcggCu.....  | 4   | 1 | j17 |
| .....cgggucgggaguuagcucaagUggu.....   | 5   | 1 | j17 |
| .....cgggucgggaguuUcuaagcgggu.....    | 12  | 1 | j17 |
| .....cgggucgggaguuagcCcaagcgggu.....  | 2   | 1 | j17 |
| .....cgggucgggaguuagcAcaagcgggu.....  | 1   | 1 | j17 |
| .....cgggucgggaguuagcucaGcgggu.....   | 25  | 1 | j17 |
| .....cgggucgggCguuagcucaagcgggu.....  | 23  | 1 | j17 |
| .....Ugggucgggaguuagcucaagcgggu.....  | 37  | 1 | j17 |
| .....cgUgucgggaguuagcucaagcgggu.....  | 1   | 1 | j17 |
| .....cggguAggaguuagcucaagcgggu.....   | 9   | 1 | j17 |
| .....cgggucgggaguuGgcucaagcgggu.....  | 4   | 1 | j17 |
| .....cgggucgggagUagcucaagcgggu.....   | 9   | 1 | j17 |
| .....cgggucgggaguuUgcucaagcgggu.....  | 1   | 1 | j17 |
| .....cggAucggaguuagcucaagcgggu.....   | 1   | 1 | j17 |
| .....cgggucgggaguuagcucaagcggAu.....  | 7   | 1 | j17 |
| .....cgggucgggaguuagcucaagcggC.....   | 31  | 1 | j17 |
| .....cgAgucgggaguuagcucaagcgggu.....  | 2   | 1 | j17 |
| .....cgggucgggaguuagcucaagcgggu.....  | 3   | 1 | j17 |
| .....cgggucgggaguuagGuaagcgggu.....   | 4   | 1 | j17 |
| .....cggguUggaguuagcucaagcgggu.....   | 9   | 1 | j17 |
| .....cgggucgggagCuagcucaagcgggu.....  | 12  | 1 | j17 |
| .....cgggucgggaguuagcucaagGgggu.....  | 3   | 1 | j17 |

cuaccgggucgggaguuagcucaagcgguuaccuccuacugcgggacuuucuaucuguccaucucugucgggguuucgagaccgcgggugcuuacugaccuuuuug

|                                       |      |   |     |
|---------------------------------------|------|---|-----|
| .....cgggucCgaguuagcucaagcggg.....    | 1    | 1 | j17 |
| .....cgggucGAguuagcucaagcggg.....     | 1    | 1 | j17 |
| .....cgggAcggaguuagcucaagcggg.....    | 38   | 1 | j17 |
| .....cgggucgggaguuagcGcaagcggg.....   | 3    | 1 | j17 |
| .....cgggucgggaguuagcucaagcggg.....   | 6487 | 0 | j17 |
| .....cgggucgggaguuagcucaagcAgu.....   | 43   | 1 | j17 |
| .....cgggucgggaguuagcucaaaAacggg..... | 1    | 1 | j17 |
| .....cgggucgggAuuagcucaagcggg.....    | 4    | 1 | j17 |
| .....cUggucgggaguuagcucaagcggg.....   | 1    | 1 | j17 |
| .....cgggucgggaguuAaCcuaagcggg.....   | 3    | 1 | j17 |
| .....cCggucgggaguuagcucaagcggg.....   | 4    | 1 | j17 |
| .....cggCucgggaguuagcucaagcggg.....   | 2    | 1 | j17 |
| .....cgggucgggaguuagcucUagcggg.....   | 3    | 1 | j17 |
| .....cgggucgggAuuagcucaagcggg.....    | 3    | 1 | j17 |
| .....cgggucgCaguuagcucaagcggg.....    | 3    | 1 | j17 |
| .....cgggucgggaguuagcucaagAaggu.....  | 20   | 1 | j17 |
| .....cgggucgggaguuagcucaagcCgu.....   | 10   | 1 | j17 |
| .....cgggucgggaguuagcucaaCcggu.....   | 5    | 1 | j17 |
| .....cAggucgggaguuagcucaagcggg.....   | 10   | 1 | j17 |
| .....cgggucgUaguuagcucaagcggg.....    | 3    | 1 | j17 |
| .....cgggucgggaguuagcucGagcggg.....   | 7    | 1 | j17 |
| .....cgggucgggaguuagcucaagcggg.....   | 8    | 1 | j17 |
| .....cgggucgggaguuAacuaagcggg.....    | 1    | 1 | j17 |
| .....cgggucgggagGuaagcucaagcggg.....  | 26   | 1 | j17 |
| .....cgggucgggaguuagcucGagcggg.....   | 1    | 1 | j17 |
| .....Aaggucgggaguuagcucaagcgggu.....  | 2    | 1 | j17 |
| .....cgggucgggaguuagcucaaUcgggu.....  | 1    | 1 | j17 |
| .....cgggucgggagGuaagcucaagcgggu..... | 4    | 1 | j17 |
| .....cgggucAaggaguuagcucaagcgggu..... | 1    | 1 | j17 |
| .....cgggucgggaguuagcucaagAaggu.....  | 1    | 1 | j17 |
| .....cgggucgggCuuagcucaagcgggu.....   | 1    | 1 | j17 |
| .....Ggggucgggaguuagcucaagcgggu.....  | 1    | 1 | j17 |
| .....cgggucgggaguuagcucaagcggCu.....  | 1    | 1 | j17 |
| .....cgggucgggaguuagUucaagcgggu.....  | 2    | 1 | j17 |
| .....cgggucgggaguuagcucaagcggUuu..... | 3    | 1 | j17 |
| .....cgggucgggaguuAucuaagcgggu.....   | 2    | 1 | j17 |
| .....Ugggucgggaguuagcucaagcgggu.....  | 1    | 1 | j17 |
| .....cgggucgggagAuaagcucaagcgggu..... | 1    | 1 | j17 |
| .....cgggucgggaguuagAuaagcgggu.....   | 1    | 1 | j17 |
| .....cgggucgggaguuagcucaagcgggu.....  | 487  | 0 | j17 |
| .....cgggucgggaguuagcucaagcUgu.....   | 3    | 1 | j17 |
| .....cgggucgUaguuagcucaagcgggu.....   | 1    | 1 | j17 |
| .....cgggucgggaguuagcucaagcCgu.....   | 2    | 1 | j17 |
| .....cgggucgggaguuagcucaagcggGu.....  | 4    | 1 | j17 |
| .....cgggucgggaguuagcucaCgcgggu.....  | 4    | 1 | j17 |
| .....cgggucgggGuuagcucaagcgggu.....   | 2    | 1 | j17 |
| .....cgggucgggaguuagcucCagcgggu.....  | 2    | 1 | j17 |
| .....cgggucgggaguuagcucaaCcggu.....   | 1    | 1 | j17 |
| .....cgggucgggaguuagcucaagcAgu.....   | 3    | 1 | j17 |
| .....cUggucgggaguuagcucaagcgggu.....  | 1    | 1 | j17 |
| .....cgggucgggaguuagcuAaagcgggu.....  | 1    | 1 | j17 |
| .....cgggucgggaguuagcucaagcggAu.....  | 3    | 1 | j17 |
| .....cgggGcggaguuagcucaagcgggu.....   | 11   | 1 | j17 |
| .....cgggCcggaguuagcucaagcgggu.....   | 2    | 1 | j17 |
| .....cgggucgggaguuagcucaagcggAu.....  | 109  | 1 | j17 |
| .....cgggAcggaguuagcucaagcgggu.....   | 3    | 1 | j17 |
| .....cgggucgggaguuagcucaagcggGu.....  | 1    | 1 | j17 |
| .....cgggucgggaguuagcucaagcggAu.....  | 166  | 1 | j17 |
| .....cgggucgggaguuagcucaagcgguuU..... | 41   | 1 | j17 |
| .....cgggucgggaguuagcucaagcggCa.....  | 2    | 1 | j17 |
| .....cgggucgggaguuagcucaagcgguuA..... | 14   | 1 | j17 |
| .....gggucgggaguuagcucaagcg.....      | 1    | 0 | j17 |
| .....gggucgggaguuagcucaagUgg.....     | 1    | 1 | j17 |
| .....gggucgggaguuagcucaagcGA.....     | 1    | 1 | j17 |
| .....gggucgggaguuagcuGaaagcgg.....    | 1    | 1 | j17 |
| .....gggGcggaguuagcucaagcgg.....      | 4    | 1 | j17 |
| .....Cggucgggaguuagcucaagcgg.....     | 7    | 1 | j17 |
| .....gggucgggagAuaagcucaagcgg.....    | 1    | 1 | j17 |
| .....gggucgggaguuagUucaagcgg.....     | 2    | 1 | j17 |

cuaccgggucggaguuagcucaagcgguuaccuccuacugcggacuucuaucuguccaucucugucgggguuucgagaccgcgggucuuacugaccuuuuuag

|                                     |     |   |     |
|-------------------------------------|-----|---|-----|
| .....gggucggCguuagcucaagcgg.....    | 2   | 1 | j17 |
| .....gggucggaguuagcucaagcgg.....    | 110 | 0 | j17 |
| .....gggucggagGuaagcucaagcgg.....   | 1   | 1 | j17 |
| .....gggucggaguuagAuaagcgg.....     | 3   | 1 | j17 |
| .....gggucggaguuagcuLaagcgg.....    | 1   | 1 | j17 |
| .....gggucggaguuCgcucaagcgg.....    | 2   | 1 | j17 |
| .....gggCcgaguuagcucaagcgg.....     | 2   | 1 | j17 |
| .....gggucggagCuagcucaagcgg.....    | 1   | 1 | j17 |
| .....gggucggAuuagcucaagcgg.....     | 1   | 1 | j17 |
| .....gggucggaguuagcucaagcggA.....   | 7   | 1 | j17 |
| .....Aggucggaguuagcucaagcgg.....    | 1   | 1 | j17 |
| .....gggucggaguuagcuUaagcgg.....    | 2   | 1 | j17 |
| .....gggucggaguuagcucaagcgg.....    | 482 | 0 | j17 |
| .....gggGcgaguuagcucaagcgg.....     | 9   | 1 | j17 |
| .....gggAcggaguuagcucaagcgg.....    | 5   | 1 | j17 |
| .....gggucggUguuagcucaagcgg.....    | 1   | 1 | j17 |
| .....Uggucggaguuagcucaagcgg.....    | 1   | 1 | j17 |
| .....gggucggaguuagcucaagcggA.....   | 6   | 1 | j17 |
| .....gggucggaguuagcCcaagcgg.....    | 3   | 1 | j17 |
| .....ggAucggaguuagcucaagcgg.....    | 1   | 1 | j17 |
| .....gggucggaguuagcucaagcggC.....   | 7   | 1 | j17 |
| .....gggucggagCuagcucaagcgg.....    | 1   | 1 | j17 |
| .....gggucggagAuaagcucaagcgg.....   | 1   | 1 | j17 |
| .....gggucggaguuCgcucaagcgg.....    | 1   | 1 | j17 |
| .....gggCcgaguuagcucaagcgg.....     | 3   | 1 | j17 |
| .....gggucggGguuagcucaagcgg.....    | 1   | 1 | j17 |
| .....ggguAggaguuagcucaagcgg.....    | 2   | 1 | j17 |
| .....gggucggaguuagcucaagGgg.....    | 1   | 1 | j17 |
| .....Cggucggaguuagcucaagcgg.....    | 3   | 1 | j17 |
| .....gggucggaguuagcuLaagcgg.....    | 1   | 1 | j17 |
| .....gggucggaguuagUuaagcgg.....     | 2   | 1 | j17 |
| .....gggucggaguuagcucaagcggCu.....  | 3   | 1 | j17 |
| .....gggucggaguuagcucaagAggu.....   | 1   | 1 | j17 |
| .....gggucggaguuagcucCagcgg.....    | 3   | 1 | j17 |
| .....gggucggaguuagcucaagUgg.....    | 1   | 1 | j17 |
| .....gggucggaguuagcucaCgcgg.....    | 1   | 1 | j17 |
| .....gggucggagGuaagcucaagcgg.....   | 4   | 1 | j17 |
| .....gggucggaguuagcucaagcgguu.....  | 62  | 0 | j17 |
| .....gggucggAuuagcucaagcgguu.....   | 1   | 1 | j17 |
| .....gggCcgaguuagcucaagcgguu.....   | 1   | 1 | j17 |
| .....gggucggaguuagcucaagcggA.....   | 1   | 1 | j17 |
| .....gggAcggaguuagcucaagcgguu.....  | 1   | 1 | j17 |
| .....gggucggaguuagcucaagcggA.....   | 33  | 1 | j17 |
| .....ggguUggaguuagcucaagcgguu.....  | 1   | 1 | j17 |
| .....gggCcgaguuagcucaagcgguu.....   | 3   | 1 | j17 |
| .....gggucggaguuagcucaagcggua.....  | 11  | 1 | j17 |
| .....gggucggaguuagcucaagcgguuU..... | 21  | 1 | j17 |
| .....gggucggaguuagcucaagcggCa.....  | 1   | 1 | j17 |
| .....gggucggaguuagcucaagcgguuA..... | 2   | 0 | j17 |
| .....gggucggaguuagcucaagcgguuA..... | 1   | 1 | j17 |
| .....ggucggaguuagcucaagcgg.....     | 1   | 0 | j17 |
| .....Cgucggaguuagcucaagcgg.....     | 2   | 1 | j17 |
| .....ggucggaguuagcucaagcgg.....     | 3   | 0 | j17 |
| .....ucggaguuagcucaagcgguuacc.....  | 1   | 0 | j17 |
| .....ggaguuagcucaagcggA.....        | 2   | 1 | j17 |
| .....ggaguuagcuLaagcgg.....         | 1   | 1 | j17 |
| .....ggaguuagcucaagcggCu.....       | 1   | 1 | j17 |
| .....ggaguuagcucaagcgg.....         | 19  | 0 | j17 |
| .....ggaguuagcucaagcgguu.....       | 3   | 0 | j17 |
| .....ggaguuagcucaagAgguu.....       | 1   | 1 | j17 |
| .....ggaguuagcucaagcggua.....       | 1   | 1 | j17 |
| .....uaccuccuacugcggacuu.....       | 1   | 0 | j17 |
| .....uaccuccuacugcggacuuu.....      | 1   | 0 | j17 |
| .....uacUuccuacugcggacuuu.....      | 1   | 1 | j17 |
| .....uaccuccuacugcggacuuucu.....    | 2   | 0 | j17 |
| .....cuacugcggacuuucuauc.....       | 1   | 0 | j17 |
| .....ucaugcggacuuucua.....          | 1   | 0 | j17 |
| .....ucaugcggacuuucuauc.....        | 1   | 0 | j17 |
| .....cucugucgggguuucgagacc.....     | 2   | 0 | j17 |

cuaccgggucggaguuagcucaagcgguuaccuccuacugcgggacuuucuaucuguccaucugugcgggguuucgagacccgcgggugcuuacugaccuuuuug

|                                  |      |   |     |
|----------------------------------|------|---|-----|
| .....cugugcugggguucgaga.....     | 1    | 0 | j17 |
| .....cugugcugggguucgagacc.....   | 2    | 0 | j17 |
| .....cugugcugggguucgagacc.....   | 1    | 0 | j17 |
| .....cgcgggGgcuuacugacc.....     | 1    | 1 | j17 |
| .....cgcgggugcuuacugacc.....     | 15   | 0 | j17 |
| .....cgcgggugcuuacugUcc.....     | 1    | 1 | j17 |
| .....cgcgggAgcuuacugacc.....     | 1    | 1 | j17 |
| .....cgcgggugcuuacugaccC.....    | 1    | 1 | j17 |
| .....cgcgggAgcuuacugaccuu.....   | 2    | 1 | j17 |
| .....cgcgggugcuuacugaccG.....    | 1    | 1 | j17 |
| .....cAcgggugcuuacugaccuu.....   | 1    | 1 | j17 |
| .....cgcgggCgcuuacugaccuu.....   | 1    | 1 | j17 |
| .....cgcgggugAuacugaccuu.....    | 2    | 1 | j17 |
| .....cgcgggugcuuacugaccuu.....   | 81   | 0 | j17 |
| .....cgCaggugcuuacugaccuu.....   | 1    | 1 | j17 |
| .....cgcgggugcuuacugaccUu.....   | 1    | 1 | j17 |
| .....cgcgggugcuGacugaccuu.....   | 2    | 1 | j17 |
| .....cgcgggugcuuacugaccAuu.....  | 12   | 1 | j17 |
| .....cgcgggugcuuacugaccuC.....   | 2    | 1 | j17 |
| .....cgcggguCuuacugaccuu.....    | 1    | 1 | j17 |
| .....cgcgggugcuuacugaccCu.....   | 2    | 1 | j17 |
| .....cgcgggugcuuacugaccuG.....   | 2    | 1 | j17 |
| .....cgcgggCugcuuacugaccuu.....  | 4    | 1 | j17 |
| .....cgcgggugcuuacugaccGcuu..... | 1    | 1 | j17 |
| .....cgcgggCgcuuacugaccuu.....   | 14   | 1 | j17 |
| .....cgcgggugcuuacugGccuu.....   | 2    | 1 | j17 |
| .....cAcgggugcuuacugaccuu.....   | 5    | 1 | j17 |
| .....cgcgggAuacugaccuu.....      | 4    | 1 | j17 |
| .....Agcgggugcuuacugaccuu.....   | 4    | 1 | j17 |
| .....cgAgggugcuuacugaccuu.....   | 5    | 1 | j17 |
| .....cgcgggugcuuacugaccUcuu..... | 3    | 1 | j17 |
| .....cgcgggugcuuUgaccuu.....     | 8    | 1 | j17 |
| .....cgcgggugcGuacugaccuu.....   | 2    | 1 | j17 |
| .....cgcgggugcuuGugaccuu.....    | 1    | 1 | j17 |
| .....cgcgggugcuuacugGccuu.....   | 1    | 1 | j17 |
| .....cgcgggugcuuacugaccAuu.....  | 7    | 1 | j17 |
| .....cCcgggugcuuacugaccuu.....   | 1    | 1 | j17 |
| .....Ugcgggugcuuacugaccuu.....   | 2    | 1 | j17 |
| .....cgcgggugcuuacugaccG.....    | 1    | 1 | j17 |
| .....cgcgggugcuuacugaccuu.....   | 3    | 1 | j17 |
| .....cgUgggugcuuacugaccuu.....   | 5    | 1 | j17 |
| .....cgcgggugcuuacugaccuA.....   | 43   | 1 | j17 |
| .....cgcgggGgcuuacugaccuu.....   | 27   | 1 | j17 |
| .....cgcgggugcuuacugAaccuu.....  | 8    | 1 | j17 |
| .....cgCaggugcuuacugaccuu.....   | 1    | 1 | j17 |
| .....cgcgggAgcuuacugaccuu.....   | 9    | 1 | j17 |
| .....cgcgggugcCuacugaccuu.....   | 1    | 1 | j17 |
| .....cgcgAgugcuuacugaccuu.....   | 2    | 1 | j17 |
| .....cgcgggugcuuacugUccuu.....   | 3    | 1 | j17 |
| .....cgcgggugcuuacuUaccuu.....   | 5    | 1 | j17 |
| .....cgcgggugcuuacugCccuu.....   | 5    | 1 | j17 |
| .....cgcgggugcuuAugaccuu.....    | 4    | 1 | j17 |
| .....cgcgggugAuacugaccuu.....    | 5    | 1 | j17 |
| .....cgcgggugcuuacugaccuu.....   | 1338 | 0 | j17 |
| .....cgcgggugcuuacugaccUuu.....  | 10   | 1 | j17 |
| .....cgcgggugcuuacugUccuu.....   | 2    | 1 | j17 |
| .....cgcgggugUuuacugaccuu.....   | 8    | 1 | j17 |
| .....cgcgggUcuuacugaccuu.....    | 2    | 1 | j17 |
| .....cgcgggugcuAacugaccuu.....   | 1    | 1 | j17 |
| .....cgcgggugcuuacugAaccuu.....  | 5    | 1 | j17 |
| .....cgcgggugcuuacugaccCuu.....  | 2    | 1 | j17 |
| .....cgcgggugcuuUgaccuuu.....    | 2    | 1 | j17 |
| .....cgcgggugcuuacugaccGcuu..... | 1    | 1 | j17 |
| .....cgcgCgugcuuacugaccuuu.....  | 1    | 1 | j17 |
| .....cgcgggCgcuuacugaccuuu.....  | 13   | 1 | j17 |
| .....cgcgggugcuuacugaccuCu.....  | 4    | 1 | j17 |
| .....cgcgggugUuuacugaccuuu.....  | 6    | 1 | j17 |
| .....cgcgggAgcuuacugaccuuu.....  | 17   | 1 | j17 |
| .....cgAgggugcuuacugaccuuu.....  | 1    | 1 | j17 |

cuaccgggucggaguagcucaagcgguuaccuccuacugcgggacuuucuaucuguccaucucugucgggguuucgagaccgcggggucuuacugaccuuuuuug

|                                 |     |   |     |
|---------------------------------|-----|---|-----|
| .....cgcggggGcuuacugaccuuu...   | 7   | 1 | j17 |
| .....cgcggggucuuacuUaccuuu...   | 1   | 1 | j17 |
| .....cgcggggucuuacugaccuuAu...  | 7   | 1 | j17 |
| .....cgcggggucuuacugaccAuuu...  | 3   | 1 | j17 |
| .....cgcgggguCuuacugaccuuu...   | 1   | 1 | j17 |
| .....Agcggggucuuacugaccuuu...   | 4   | 1 | j17 |
| .....cgcggggucuuAAugaccuuu...   | 3   | 1 | j17 |
| .....cgcggggucuuacugaccUuuu...  | 2   | 1 | j17 |
| .....cgcggggucuuacugaccuuA...   | 16  | 1 | j17 |
| .....cgcggggAuuuacugaccuuu...   | 1   | 1 | j17 |
| .....cgcggggucuCacugaccuuu...   | 1   | 1 | j17 |
| .....cgcggggucuuacuCaaccuuu...  | 1   | 1 | j17 |
| .....cgcggggucuuacugaccuuG...   | 5   | 1 | j17 |
| .....cgcggggucuuacugaccuuu...   | 700 | 0 | j17 |
| .....cgcgggguUuuacugaccuuu...   | 1   | 1 | j17 |
| .....cgcggggucuuacugaccuuGu...  | 1   | 1 | j17 |
| .....cgcggggucuuacugaccAuuu...  | 4   | 1 | j17 |
| .....cgcggggucuuacuAaccuuu...   | 1   | 1 | j17 |
| .....cgcgggUuguuacugaccuuu...   | 1   | 1 | j17 |
| .....cUcggggucuuacugaccuuu...   | 2   | 1 | j17 |
| .....cAcgggucuuacugaccuuu...    | 3   | 1 | j17 |
| .....cgcggggucuuacugaccuuu...   | 4   | 1 | j17 |
| .....cgcggggucuuAGugaccuuu...   | 1   | 1 | j17 |
| .....cgcggggucGacugaccuuu...    | 1   | 1 | j17 |
| .....cgcggggucuuCugaccuuu...    | 2   | 1 | j17 |
| .....Ucggggucuuacugaccuuu...    | 2   | 1 | j17 |
| .....cgcggggucuuacugaccuuC...   | 5   | 1 | j17 |
| .....cCcggggucuuacugaccuuu...   | 2   | 1 | j17 |
| .....cgcggggucuuacugaccUuuu...  | 3   | 1 | j17 |
| .....cgcggggucuuacugaccuuuC...  | 1   | 1 | j17 |
| .....cgcggggGcuuacugaccuuuu...  | 2   | 1 | j17 |
| .....cgcggggucuuacugaccuuAu...  | 2   | 1 | j17 |
| .....cgcggggucuuacugaccuuuA...  | 14  | 1 | j17 |
| .....cgcggggucuuacugaccuuuu...  | 47  | 0 | j17 |
| .....cgcggggucuuacugaccuuCu...  | 1   | 1 | j17 |
| .....cgcggggucuuacugaccCuuu...  | 1   | 1 | j17 |
| .....cgcggggAgcuuacugaccuuuu... | 1   | 1 | j17 |
| .....Gcggggucuuacugaccuuuu...   | 1   | 1 | j17 |
| .....cgcggggucuuacugaccuuCuu... | 1   | 1 | j17 |
| .....cgcggggucuuacugaccuuuuU... | 6   | 1 | j17 |
| .....cgcggggucuuacugaccuuuuA... | 2   | 0 | j17 |
| .....cgcggggucuuacugaccuuuAa... | 1   | 1 | j17 |
| .....gcggggucuuacugaccuuu...    | 4   | 0 | j17 |
| .....gcgggucuuacuUaccuuu...     | 1   | 1 | j17 |
| .....cggggucuuacugaccuu...      | 1   | 0 | j17 |
| .....gggucuuacugaccuuA...       | 1   | 1 | j17 |
| .....gugcuuacugaccuuCuu...      | 2   | 1 | j17 |
| ..accgggucggaguagcucaagcggg...  | 25  | 0 | 1a2 |
| ..accgggucggaguagcGcaagcggg...  | 1   | 1 | 1a2 |
| ..acUcgggucggaguagcucaagcggg... | 1   | 1 | 1a2 |
| ..Gccgggucggaguagcucaagcggg...  | 1   | 1 | 1a2 |
| ..accgggucggaguagcucaagcggg...  | 37  | 0 | 1a2 |
| ..accgggucggagGuagcucaagcggg... | 1   | 1 | 1a2 |
| ..accgGAgucggaguagcucaagcggg... | 1   | 1 | 1a2 |
| ..accgggucggaguagcucaagcggA...  | 1   | 1 | 1a2 |
| ..accgggucggaguagcucaagcGGu...  | 1   | 1 | 1a2 |
| ..accgggucggaguagcucaaUcggu...  | 1   | 1 | 1a2 |
| ..accggGcucggaguagcucaagcggg... | 1   | 1 | 1a2 |
| ..accgggucggaguuaCcucaagcggg... | 1   | 1 | 1a2 |
| ..accgggucggaguagcucaagcgguA... | 1   | 1 | 1a2 |
| ..accgggucggaguagcucaagcgguu... | 6   | 0 | 1a2 |
| ..accgggucggaguagcucaagcGgu...  | 1   | 1 | 1a2 |
| ..Uccgggucggaguagcucaagcggg...  | 1   | 1 | 1a2 |
| ..Accgggucggaguagcucaagcggg...  | 3   | 1 | 1a2 |
| ..ccgggucggaguagcucaagcggg...   | 7   | 0 | 1a2 |
| ..ccUgggucggaguagcucaagcggg...  | 1   | 1 | 1a2 |
| ..ccgggucggaguagcucaagcggg...   | 8   | 0 | 1a2 |
| ..Uccgggucggaguagcucaagcggg...  | 1   | 1 | 1a2 |

cuaccgggucggaguuagcucaagcgguuaccuccuacugcggacuuucuaucuguccaucucugucgggguuucgagaccgcgggugcuuacugaccuuuuuug

|                                      |      |   |     |
|--------------------------------------|------|---|-----|
| ...Accgggucggaguuagcucaagcgggu.....  | 8    | 1 | 1a2 |
| ...cccgggucggaguuagcucaagcggA.....   | 1    | 1 | 1a2 |
| ...cccgggucggaguuagcucCagcgggu.....  | 1    | 1 | 1a2 |
| ...cccgggucggaguuagcucaagcgguu.....  | 4    | 0 | 1a2 |
| ...ccgggucggaguuagcucaGgcgg.....     | 1    | 1 | 1a2 |
| ...Ucgggucggaguuagcucaagcgg.....     | 2    | 1 | 1a2 |
| ...ccgggucggaguuagcucaaUcgg.....     | 1    | 1 | 1a2 |
| ...ccgggucggaguuagcucaagcggA.....    | 1    | 1 | 1a2 |
| ...ccgggucggaguuagcucaagcgg.....     | 50   | 0 | 1a2 |
| ...ccgggucggaguuagcucaCgcgg.....     | 1    | 1 | 1a2 |
| ...ccgggucggaguuGgcucaagcgg.....     | 1    | 1 | 1a2 |
| ...Acgggucggaguuagcucaagcgggu.....   | 1    | 1 | 1a2 |
| ...ccggguUggaguuagcucaagcgggu.....   | 1    | 1 | 1a2 |
| ...ccgggucggaguuUcucagcgggu.....     | 1    | 1 | 1a2 |
| ...ccgggucggaguuagcucaagcggA.....    | 2    | 1 | 1a2 |
| ...ccgggucggaguuagcGcaagcgggu.....   | 1    | 1 | 1a2 |
| ...ccUggucggaguuagcucaagcgggu.....   | 1    | 1 | 1a2 |
| ...cGgggucggaguuagcucaagcgggu.....   | 1    | 1 | 1a2 |
| ...ccgggucggaguuagcucaagcgggu.....   | 92   | 0 | 1a2 |
| ...Ucgggucggaguuagcucaagcgguu.....   | 1    | 1 | 1a2 |
| ...ccgggucggaguuagcucaagcggUuu.....  | 1    | 1 | 1a2 |
| ...ccgggucggaguuagcucaagcggguA.....  | 2    | 1 | 1a2 |
| ...cGgggucggaguuagcucaagcgggu.....   | 2    | 1 | 1a2 |
| ...ccgggucggaguuagcucaagcgguu.....   | 18   | 0 | 1a2 |
| ...ccgggucggaguuagcucaagcgguuu.....  | 2    | 0 | 1a2 |
| ...cGgggucggaguuagcucaagcgguuu.....  | 1    | 1 | 1a2 |
| ...ccgggucggaguuagcucaagcgguuA.....  | 1    | 1 | 1a2 |
| ...ccgggucggaguuagcucaagcgguuU.....  | 18   | 1 | 1a2 |
| ...ccgggucggaguuagcucaagcgguuuU..... | 1    | 1 | 1a2 |
| ...cgggucggaguuagcucaagc.....        | 2    | 0 | 1a2 |
| ...cgggucggaguuagcucaaUc.....        | 1    | 1 | 1a2 |
| ...cgggucggaguuagcucaagc.....        | 8    | 0 | 1a2 |
| ...cgggucggaguuagcucaaUcgg.....      | 2    | 1 | 1a2 |
| ...cgggucggaguuagcucaagcggU.....     | 3    | 1 | 1a2 |
| ...cggguAaggaguuagcucaagcgg.....     | 1    | 1 | 1a2 |
| ...cgggucggaguuagcucaagcA.....       | 2    | 1 | 1a2 |
| ...cgggucCgaguuagcucaagcgg.....      | 1    | 1 | 1a2 |
| ...cgggucggaguuGgcucaagcgg.....      | 1    | 1 | 1a2 |
| ...cgggGcggaguuagcucaagcgg.....      | 6    | 1 | 1a2 |
| ...cggUcggaguuagcucaagcgg.....       | 1    | 1 | 1a2 |
| ...cgggucgggACuuagcucaagcgg.....     | 1    | 1 | 1a2 |
| ...cgggucggaguuagUucaagcgg.....      | 4    | 1 | 1a2 |
| ...Ggggucggaguuagcucaagcgg.....      | 15   | 1 | 1a2 |
| ...cgggucggaguuagcucaagcggA.....     | 2    | 1 | 1a2 |
| ...cgggucggaguuagcucaagcggC.....     | 1    | 1 | 1a2 |
| ...cUggucggaguuagcucaagcgg.....      | 1    | 1 | 1a2 |
| ...cgggucAaguuagcucaagcgg.....       | 1    | 1 | 1a2 |
| ...cggguUggaguuagcucaagcgg.....      | 4    | 1 | 1a2 |
| ...cgggucggaguuagcucaaCcg.....       | 1    | 1 | 1a2 |
| ...cgggucggaguuagcucCagcgg.....      | 4    | 1 | 1a2 |
| ...cggCucggaguuagcucaagcgg.....      | 1    | 1 | 1a2 |
| ...cgggucggaguuagcucaagcgg.....      | 830  | 0 | 1a2 |
| ...cgggucggGguuagcucaagcgg.....      | 2    | 1 | 1a2 |
| ...cgggucggUguuagcucaagcgg.....      | 1    | 1 | 1a2 |
| ...cgggucggaguuagcucaCgcgg.....      | 3    | 1 | 1a2 |
| ...cgggucggaguuagcuUaagcgg.....      | 1    | 1 | 1a2 |
| ...Agggucggaguuagcucaagcgg.....      | 4    | 1 | 1a2 |
| ...cgggucggagCuaagcucaagcgg.....     | 1    | 1 | 1a2 |
| ...cgggucgggAUuuagcucaagcgg.....     | 2    | 1 | 1a2 |
| ...cgggucgAguuagcucaagcgg.....       | 1    | 1 | 1a2 |
| ...Ugggucggaguuagcucaagcgg.....      | 4    | 1 | 1a2 |
| ...cgggAcggaguuagcucaagcgg.....      | 1    | 1 | 1a2 |
| ...cgggucggagucCagcucaagcgggu.....   | 1    | 1 | 1a2 |
| ...cgggucggaguuagcucaagcgggu.....    | 2175 | 0 | 1a2 |
| ...cgggucggaguuagcuUaagcgggu.....    | 2    | 1 | 1a2 |
| ...cgggGcggaguuagcucaagcgggu.....    | 12   | 1 | 1a2 |
| ...cgCgucggaguuagcucaagcgggu.....    | 2    | 1 | 1a2 |
| ...cgggucggaguuagcucaagcggC.....     | 4    | 1 | 1a2 |
| ...cgggucggaguuagcucCagcgggu.....    | 4    | 1 | 1a2 |

cuaccgggucgggaguuagcucaagcgguuaccuccuacugcgggacuuucuaucuguccaucucugucgggguuucgagaccgcgggugcuuacugaccuuuuuag

|                                         |     |   |     |
|-----------------------------------------|-----|---|-----|
| .....cgggucgggaguuUcuaagcgggu.....      | 2   | 1 | 1a2 |
| .....cgggucgggagGuagcucaagcgggu.....    | 4   | 1 | 1a2 |
| .....cggguUggaguuagcucaagcgggu.....     | 4   | 1 | 1a2 |
| .....Ggggucgggaguuagcucaagcgggu.....    | 28  | 1 | 1a2 |
| .....cgggucgggACuuagcucaagcgggu.....    | 1   | 1 | 1a2 |
| .....cgggucgggUuuagcucaagcgggu.....     | 1   | 1 | 1a2 |
| .....Ugggucgggaguuagcucaagcgggu.....    | 11  | 1 | 1a2 |
| .....cgggucgggaguuagcucaagAGgu.....     | 1   | 1 | 1a2 |
| .....cgggucgggaguuagcuAaagcgggu.....    | 1   | 1 | 1a2 |
| .....cCggucgggaguuagcucaagcgggu.....    | 1   | 1 | 1a2 |
| .....cgUgucgggaguuagcucaagcgggu.....    | 2   | 1 | 1a2 |
| .....cgggucgggaguuagcucaagGgggu.....    | 1   | 1 | 1a2 |
| .....cgggucgUgaguuagcucaagcgggu.....    | 1   | 1 | 1a2 |
| .....cgggucgggaguuagcucaagcggG.....     | 5   | 1 | 1a2 |
| .....cgggCcgaguuagcucaagcgggu.....      | 1   | 1 | 1a2 |
| .....Agggucgggaguuagcucaagcgggu.....    | 4   | 1 | 1a2 |
| .....cgggucgggAUuagcucaagcgggu.....     | 4   | 1 | 1a2 |
| .....cgggucgggaguuagcucaagcUgu.....     | 2   | 1 | 1a2 |
| .....cgggucgggaguuagcucaaUcgggu.....    | 9   | 1 | 1a2 |
| .....cUggucgggaguuagcucaagcgggu.....    | 6   | 1 | 1a2 |
| .....cgggucgggaguuagcucaagcGgu.....     | 1   | 1 | 1a2 |
| .....cgggucgggaguuagcGcaagcgggu.....    | 1   | 1 | 1a2 |
| .....cgggucgggaguuagcucaagcggA.....     | 50  | 1 | 1a2 |
| .....cggCucgggaguuagcucaagcgggu.....    | 1   | 1 | 1a2 |
| .....cgggucAgaguuagcucaagcgggu.....     | 1   | 1 | 1a2 |
| .....cgggAcggaguuagcucaagcgggu.....     | 2   | 1 | 1a2 |
| .....cgAgucgggaguuagcucaagcgggu.....    | 1   | 1 | 1a2 |
| .....cgggucgggaguuagcucaCgcgggu.....    | 5   | 1 | 1a2 |
| .....cgggucgggaguuagcGcucaagcgggu.....  | 1   | 1 | 1a2 |
| .....cgggucgggaguuagGcucaagcgggu.....   | 1   | 1 | 1a2 |
| .....cgggucgggaguuAcucaagcgggu.....     | 1   | 1 | 1a2 |
| .....cgggucUgaguuagcucaagcgggu.....     | 1   | 1 | 1a2 |
| .....cgggucgggAUuagcucaagcgggu.....     | 1   | 1 | 1a2 |
| .....cgggAcggaguuagcucaagcgggu.....     | 1   | 1 | 1a2 |
| .....cgggucgggaguuagcucaCgcgggu.....    | 3   | 1 | 1a2 |
| .....cgggucgggaguuagcuAaagcgggu.....    | 1   | 1 | 1a2 |
| .....cgggucgggaguuagcucaagcgguC.....    | 4   | 1 | 1a2 |
| .....Agggucgggaguuagcucaagcgggu.....    | 2   | 1 | 1a2 |
| .....cgggGcggaguuagcucaagcgggu.....     | 3   | 1 | 1a2 |
| .....cgCgucgggaguuagcucaagcgggu.....    | 1   | 1 | 1a2 |
| .....cUggucgggaguuagcucaagcgggu.....    | 1   | 1 | 1a2 |
| .....Ggggucgggaguuagcucaagcgggu.....    | 11  | 1 | 1a2 |
| .....cgggucgggaguuagcuGaaagcgggu.....   | 1   | 1 | 1a2 |
| .....cggguUggaguuagcucaagcgggu.....     | 2   | 1 | 1a2 |
| .....cgggucgggaguuagcucaagcggAu.....    | 4   | 1 | 1a2 |
| .....cgggucgggaguuagAucaagcgggu.....    | 1   | 1 | 1a2 |
| .....cgggucgggaguuagcucaagcggguA.....   | 118 | 1 | 1a2 |
| .....cgggucgggaguuACucaagcgggu.....     | 1   | 1 | 1a2 |
| .....cggguAggaguuagcucaagcgggu.....     | 2   | 1 | 1a2 |
| .....cgggucgggaguuagcucaagcgggu.....    | 528 | 0 | 1a2 |
| .....Ugggucgggaguuagcucaagcgggu.....    | 3   | 1 | 1a2 |
| .....cgggucgggaguuagcuUaagcgggu.....    | 1   | 1 | 1a2 |
| .....cgggucgggaguuagcucaagcggguG.....   | 5   | 1 | 1a2 |
| .....cgggucgggaguuagcucGagcgggu.....    | 1   | 1 | 1a2 |
| .....cgggucgggaguuagcucaagcggguAa.....  | 53  | 1 | 1a2 |
| .....cgggucgggaguuagcucaagcggguua.....  | 66  | 0 | 1a2 |
| .....Ugggucgggaguuagcucaagcggguua.....  | 1   | 1 | 1a2 |
| .....cgggucgggaguuagcucaagcggguuC.....  | 4   | 1 | 1a2 |
| .....cgggucgggaguuagcucaagcggCu.....    | 1   | 1 | 1a2 |
| .....cgUgucgggaguuagcucaagcggguua.....  | 1   | 1 | 1a2 |
| .....cUggucgggaguuagcucaagcggguua.....  | 1   | 1 | 1a2 |
| .....cgggucgggaguuagcucaagcggguU.....   | 227 | 1 | 1a2 |
| .....Ggggucgggaguuagcucaagcggguua.....  | 2   | 1 | 1a2 |
| .....cgggucgggaguuAUcuaagcggguua.....   | 1   | 1 | 1a2 |
| .....cgggucgggAUuagcucaagcggguua.....   | 1   | 1 | 1a2 |
| .....cgggucgggaguuagcucaagcggguuU.....  | 9   | 1 | 1a2 |
| .....cgggucgggaguuagcucaagcggguuaA..... | 4   | 1 | 1a2 |
| .....cgggucgggaguuagcucaagcggguuac..... | 4   | 0 | 1a2 |
| .....gggucgggaguuagcucaag.....          | 1   | 0 | 1a2 |



cuaccgggucggaguuagcucaagcgguuaccuccuacugcggacuuucuaucuguccaucucugucgggguuucgagaccgcgggugcuuacugaccuuuuuug

|                                    |      |   |     |
|------------------------------------|------|---|-----|
| .....gggucggaguuagcucaagc.....     | 4    | 0 | 1a2 |
| .....gggucggaguuagcucaagcg.....    | 14   | 0 | 1a2 |
| .....gggucggagCuagcucaagcgg.....   | 2    | 1 | 1a2 |
| .....gggucggaguuagcGcaagcgg.....   | 1    | 1 | 1a2 |
| .....gggucggaguuagcuUaagcgg.....   | 2    | 1 | 1a2 |
| .....Uggucggaguuagcucaagcgg.....   | 2    | 1 | 1a2 |
| .....gggAcggaguuagcucaagcgg.....   | 1    | 1 | 1a2 |
| .....gAgucggaguuagcucaagcgg.....   | 2    | 1 | 1a2 |
| .....gCgucggaguuagcucaagcgg.....   | 2    | 1 | 1a2 |
| .....Cggucggaguuagcucaagcgg.....   | 1    | 1 | 1a2 |
| .....gggucggaguuUcucaagcgg.....    | 4    | 1 | 1a2 |
| .....ggguAggaguuagcucaagcgg.....   | 3    | 1 | 1a2 |
| .....gggucggaguuagcucaCgcgg.....   | 3    | 1 | 1a2 |
| .....gggucggaguuagcCcaagcgg.....   | 1    | 1 | 1a2 |
| .....ggAucggaguuagcucaagcgg.....   | 1    | 1 | 1a2 |
| .....ggguUggaguuagcucaagcgg.....   | 2    | 1 | 1a2 |
| .....gggGcggaguuagcucaagcgg.....   | 12   | 1 | 1a2 |
| .....gggucggGguagcucaagcgg.....    | 1    | 1 | 1a2 |
| .....gggucggaguuagcucaaUcgg.....   | 1    | 1 | 1a2 |
| .....gggucggagGuagcucaagcgg.....   | 1    | 1 | 1a2 |
| .....gggucggaguuagUucaagcgg.....   | 2    | 1 | 1a2 |
| .....gggucggaguuagcucCagcgg.....   | 13   | 1 | 1a2 |
| .....gggucggaguuacCucaagcgg.....   | 1    | 1 | 1a2 |
| .....gggucggaguuagcucaaAcgg.....   | 2    | 1 | 1a2 |
| .....gggucggaCuuaagcucaagcgg.....  | 1    | 1 | 1a2 |
| .....gggucggaguuUgcuaagcgg.....    | 1    | 1 | 1a2 |
| .....gggCcgaguuagcucaagcgg.....    | 3    | 1 | 1a2 |
| .....gggucAgaguuagcucaagcgg.....   | 1    | 1 | 1a2 |
| .....gggucggaguuagcucaagcGU.....   | 1    | 1 | 1a2 |
| .....gggucggaguuagcucaagUgg.....   | 1    | 1 | 1a2 |
| .....gggucggaguuagcucUagcgg.....   | 1    | 1 | 1a2 |
| .....gggucggaguuagcucaagcUg.....   | 4    | 1 | 1a2 |
| .....gggucggaguuagcucaagcgg.....   | 1859 | 0 | 1a2 |
| .....gggucggaAuuaagcucaagcgg.....  | 2    | 1 | 1a2 |
| .....gggucgAaguuagcucaagcgg.....   | 2    | 1 | 1a2 |
| .....gggucggaguuagAuaagcgg.....    | 4    | 1 | 1a2 |
| .....gggucggaUuuagcucaagcgg.....   | 2    | 1 | 1a2 |
| .....gggucgUaguuagcucaagcggU.....  | 1    | 1 | 1a2 |
| .....gggGcggaguuagcucaagcggU.....  | 31   | 1 | 1a2 |
| .....gggucggaguuacCucaagcggU.....  | 1    | 1 | 1a2 |
| .....gggucggaguuAAcuaagcggU.....   | 2    | 1 | 1a2 |
| .....gggucCgaguuagcucaagcggU.....  | 1    | 1 | 1a2 |
| .....gggucggaguuagcucaagcggA.....  | 58   | 1 | 1a2 |
| .....gggucggaguuagcucaagcggU.....  | 4    | 1 | 1a2 |
| .....gggucggagUGagcucaagcggU.....  | 2    | 1 | 1a2 |
| .....gggucggaguuagcGcaagcggU.....  | 4    | 1 | 1a2 |
| .....gggucggaAuuaagcucaagcggU..... | 2    | 1 | 1a2 |
| .....ggAucggaguuagcucaagcggU.....  | 1    | 1 | 1a2 |
| .....gggucggaguuagcucaagcGU.....   | 9    | 1 | 1a2 |
| .....gggucggaguuUcucaagcggU.....   | 5    | 1 | 1a2 |
| .....UggucggaguuagcucaagcggU.....  | 3    | 1 | 1a2 |
| .....gggucggaguuagUucaagcggU.....  | 3    | 1 | 1a2 |
| .....gggucggaguuagcucaagcggU.....  | 4463 | 0 | 1a2 |
| .....gggucgAaguuagcucaagcggU.....  | 3    | 1 | 1a2 |
| .....gggAcggaguuagcucaagcggU.....  | 4    | 1 | 1a2 |
| .....gggucggaguuagcucCagcggU.....  | 40   | 1 | 1a2 |
| .....gggucggaCuuaagcucaagcggU..... | 2    | 1 | 1a2 |
| .....gggucggaguuagcucaaAcggU.....  | 1    | 1 | 1a2 |
| .....gggucUgaguuagcucaagcggU.....  | 1    | 1 | 1a2 |
| .....gggucggaguuagcucaagcCGU.....  | 3    | 1 | 1a2 |
| .....CggucggaguuagcucaagcggU.....  | 6    | 1 | 1a2 |
| .....gAgucggaguuagcucaagcggU.....  | 2    | 1 | 1a2 |
| .....ggCucggaguuagcucaagcggU.....  | 1    | 1 | 1a2 |
| .....gggucggaguuagcCcaagcggU.....  | 5    | 1 | 1a2 |
| .....gggucggagucagcucaagcggU.....  | 2    | 1 | 1a2 |
| .....gggucggaguuagcuUaagcggU.....  | 3    | 1 | 1a2 |
| .....gggucggaguuagcucaUgcggU.....  | 2    | 1 | 1a2 |
| .....gCgucggaguuagcucaagcggU.....  | 2    | 1 | 1a2 |
| .....gggucggaguuagcucaagcggG.....  | 11   | 1 | 1a2 |

cuaccgggucgggaguuagcucaagcgguuaccuccuacugcggacuuucuaucuguccaucucugugcgggguucgagaccgcgggugcuuacugaccuuuuuag

|                                      |      |   |     |
|--------------------------------------|------|---|-----|
| .....gggucggaUuuagcucaagcgggu.....   | 2    | 1 | 1a2 |
| .....gggucggagCuagcucaagcgggu.....   | 1    | 1 | 1a2 |
| .....gggucggaguuagcucaaUcgggu.....   | 10   | 1 | 1a2 |
| .....gggucggaguuagcuAaagcgggu.....   | 5    | 1 | 1a2 |
| .....gggucggaguuagcucaagUgggu.....   | 1    | 1 | 1a2 |
| .....gggucggaguuagcucaagcgggu.....   | 1    | 1 | 1a2 |
| .....ggguAaggaguuagcucaagcgggu.....  | 8    | 1 | 1a2 |
| .....gggucgggUguuagcucaagcgggu.....  | 3    | 1 | 1a2 |
| .....gggucggaguuagcucUagcgggu.....   | 1    | 1 | 1a2 |
| .....gggCcggaguuagcucaagcgggu.....   | 2    | 1 | 1a2 |
| .....gggucAagaguuagcucaagcgggu.....  | 1    | 1 | 1a2 |
| .....gggucggaguuagcucGagcgggu.....   | 2    | 1 | 1a2 |
| .....ggguUggaguuagcucaagcgggu.....   | 3    | 1 | 1a2 |
| .....gggucggaguuagcucaagcggC.....    | 9    | 1 | 1a2 |
| .....Aaggucggaguuagcucaagcgggu.....  | 2    | 1 | 1a2 |
| .....gggucggaguuagcucaCgcgggu.....   | 3    | 1 | 1a2 |
| .....gggucggaguuagAuaagcgggu.....    | 12   | 1 | 1a2 |
| .....gggucggaguuagcucaGgcgggu.....   | 3    | 1 | 1a2 |
| .....gggucggaguuGgcucaagcgggu.....   | 2    | 1 | 1a2 |
| .....gUgucggaguuagcucaagcgggu.....   | 4    | 1 | 1a2 |
| .....ggUucggaguuagcucaagcgggu.....   | 1    | 1 | 1a2 |
| .....gggucggaguuagcucaagAgggu.....   | 2    | 1 | 1a2 |
| .....gggucggagGuaagcucaagcgggu.....  | 3    | 1 | 1a2 |
| .....gggucggCguuagcucaagcgggu.....   | 2    | 1 | 1a2 |
| .....gggucgUaguuagcucaagcgggu.....   | 1    | 1 | 1a2 |
| .....gggucggaguuagcucaagcgggu.....   | 1531 | 0 | 1a2 |
| .....gggucAagaguuagcucaagcgggu.....  | 1    | 1 | 1a2 |
| .....gggucggaguuUcuaagcgggu.....     | 3    | 1 | 1a2 |
| .....gggucggaguuagcucGagcgggu.....   | 1    | 1 | 1a2 |
| .....gggucggaguuagcuGaagcgggu.....   | 1    | 1 | 1a2 |
| .....gggCcggaguuagcucaagcgggu.....   | 19   | 1 | 1a2 |
| .....gggucggaguuagcucCagcgggu.....   | 6    | 1 | 1a2 |
| .....gggucggaguuagcucaagcUguu.....   | 1    | 1 | 1a2 |
| .....gggucggaguuagcucaaUcgggu.....   | 5    | 1 | 1a2 |
| .....gggucggaguuagcuAaagcgggu.....   | 1    | 1 | 1a2 |
| .....gggucggaguuagcucaagcggguA.....  | 64   | 1 | 1a2 |
| .....gggucggaguuagcucaagAgggu.....   | 2    | 1 | 1a2 |
| .....gggucggaguuagUucaagcgggu.....   | 4    | 1 | 1a2 |
| .....gggucggaguuagcucaCgcgggu.....   | 2    | 1 | 1a2 |
| .....gggucggaguuCgcucaagcgggu.....   | 2    | 1 | 1a2 |
| .....gggucggaguuagcucUagcgggu.....   | 2    | 1 | 1a2 |
| .....gggucggaguuagcucaagcggguG.....  | 2    | 1 | 1a2 |
| .....gggucggaguuagAuaagcgggu.....    | 1    | 1 | 1a2 |
| .....gggucggGguuagcucaagcgggu.....   | 1    | 1 | 1a2 |
| .....gUgucggaguuagcucaagcgggu.....   | 1    | 1 | 1a2 |
| .....gggucggaguuagcucaagcggGdu.....  | 8    | 1 | 1a2 |
| .....Aaggucggaguuagcucaagcgggu.....  | 3    | 1 | 1a2 |
| .....ggguUggaguuagcucaagcgggu.....   | 3    | 1 | 1a2 |
| .....gggCcggaguuagcucaagcgggu.....   | 2    | 1 | 1a2 |
| .....gggucggaguuagcucaagcggguC.....  | 5    | 1 | 1a2 |
| .....Uggucggaguuagcucaagcgggu.....   | 1    | 1 | 1a2 |
| .....gggucggaguuagcuUaagcgggu.....   | 2    | 1 | 1a2 |
| .....gggucgggaUuuagcucaagcgggu.....  | 2    | 1 | 1a2 |
| .....gggucCgaguuagcucaagcgggu.....   | 1    | 1 | 1a2 |
| .....Cggucggaguuagcucaagcgggu.....   | 1    | 1 | 1a2 |
| .....gggucggagGuaagcucaagcgggu.....  | 1    | 1 | 1a2 |
| .....gggucggaguCagcucaagcgggu.....   | 1    | 1 | 1a2 |
| .....gggucggaguuagcucaagcgUuu.....   | 2    | 1 | 1a2 |
| .....gggucggaguuagcucaagcggCu.....   | 4    | 1 | 1a2 |
| .....gggucggagCuagcucaagcgggu.....   | 1    | 1 | 1a2 |
| .....gggucggaguuagcucaagcggGua.....  | 2    | 1 | 1a2 |
| .....gggucgCaguagcucaagcggguua.....  | 1    | 1 | 1a2 |
| .....gggCcggaguuagcucaagcggguua..... | 2    | 1 | 1a2 |
| .....gggucggaguuagcucaagcggguAa..... | 30   | 1 | 1a2 |
| .....gggucggaguuagcucaagcCguua.....  | 1    | 1 | 1a2 |
| .....gggucggaguuagcucaaUcggguua..... | 1    | 1 | 1a2 |
| .....gggucggaguuagcuAaagcggguua..... | 1    | 1 | 1a2 |
| .....gggucggaguuagcucaagUggguua..... | 2    | 1 | 1a2 |
| .....gggucggaguuagcucaagcggguU.....  | 225  | 1 | 1a2 |

cuaccgggucggaguuagcucaagcgguuuaccuccucaugccggacuucuaucuguccaucucugucgggguuucgagaccgcgggugcuuacugaccuuuuuag

|                                        |     |   |     |
|----------------------------------------|-----|---|-----|
| .....Uggucggaguuagcucaagcgguu.....     | 1   | 1 | 1a2 |
| .....gggucggaguuagcucaagcUguua.....    | 1   | 1 | 1a2 |
| .....gggAcggaguuagcucaagcgguu.....     | 1   | 1 | 1a2 |
| .....gggucggaguuagcucaagcGcu.....      | 1   | 1 | 1a2 |
| .....gggucggaguuagcucaagcggCua.....    | 1   | 1 | 1a2 |
| .....gggucggaguuagcucaagcgguu.....     | 380 | 0 | 1a2 |
| .....gggucggaguuAλcucaagcgguu.....     | 1   | 1 | 1a2 |
| .....gggucggaguuagUucaagcgguu.....     | 1   | 1 | 1a2 |
| .....gggucggaguuACcucaagcgguu.....     | 1   | 1 | 1a2 |
| .....gggucggaguuagcucaagcggAua.....    | 1   | 1 | 1a2 |
| .....gggucggaguuagcucaagcgguuac.....   | 24  | 0 | 1a2 |
| .....gggucggaguuagcucaagcgguuA.....    | 4   | 1 | 1a2 |
| .....gggucggaguuagcucaagcgguuU.....    | 1   | 1 | 1a2 |
| .....gggucggaguuagcucaagcgguuacA.....  | 1   | 1 | 1a2 |
| .....gggucggaguuagcucaagcgguuacc.....  | 6   | 0 | 1a2 |
| .....gggucggaguuagcucaagcggCuacc.....  | 1   | 1 | 1a2 |
| .....gggucggaguuagcucaagcgguuaccu..... | 4   | 0 | 1a2 |
| .....ggucggaguuagcucaagcgg.....        | 6   | 0 | 1a2 |
| .....ggucggaguuagcucaagcgguu.....      | 11  | 0 | 1a2 |
| .....ggucggagCuagcucaagcgguu.....      | 1   | 1 | 1a2 |
| .....ggucggaCuuaagcucaagcgguu.....     | 1   | 1 | 1a2 |
| .....ggucggaguuagcucaagcgguu.....      | 4   | 0 | 1a2 |
| .....ggucggaguuagcucaagcgguuac.....    | 2   | 0 | 1a2 |
| .....gucggaguuagcucaagcgg.....         | 1   | 0 | 1a2 |
| .....gucggaguuagcucaagcgguu.....       | 1   | 0 | 1a2 |
| .....gucggaguuagcucaagcgguuU.....      | 1   | 1 | 1a2 |
| .....ucggaguuagcucaagcgguu.....        | 2   | 0 | 1a2 |
| .....cggaguuagcucaagcgg.....           | 2   | 0 | 1a2 |
| .....ggaguuagcucaagcgguu.....          | 1   | 0 | 1a2 |
| .....agcgguuaccuccucaug.....           | 1   | 0 | 1a2 |
| .....agcgguuaccuccucaugccg.....        | 1   | 0 | 1a2 |
| .....agcgguuaccuccucaugccgga.....      | 1   | 0 | 1a2 |
| .....agcgguuaccuccucaugccggaA.....     | 1   | 1 | 1a2 |
| .....uuaccuccucaugccggac.....          | 2   | 0 | 1a2 |
| .....uuaccuccucaugccggacA.....         | 1   | 1 | 1a2 |
| .....uaccuccucaugccggac.....           | 3   | 0 | 1a2 |
| .....uaccuccucaugccggacu.....          | 2   | 0 | 1a2 |
| .....uaccuccucaugccggacA.....          | 2   | 1 | 1a2 |
| .....uaUuccuccucaugccggacu.....        | 1   | 1 | 1a2 |
| .....uaccuccucaugccggacuu.....         | 3   | 0 | 1a2 |
| .....uaccuccucaugccggacuuu.....        | 3   | 0 | 1a2 |
| .....uaccuccucaugccggacuuc.....        | 1   | 0 | 1a2 |
| .....accuccucaugccggacA.....           | 1   | 1 | 1a2 |
| .....accucUucaugccggacuu.....          | 1   | 1 | 1a2 |
| .....accuccucaugccggacuu.....          | 4   | 0 | 1a2 |
| .....accuccucaugccggacuucuu.....       | 1   | 0 | 1a2 |
| .....accuccucaugccggacuucuuU.....      | 1   | 1 | 1a2 |
| .....uccaucucugucugggguucgagaccg.....  | 1   | 0 | 1a2 |
| .....caucucugucugggguu.....            | 18  | 0 | 1a2 |
| .....caucucugucugggguuc.....           | 1   | 0 | 1a2 |
| .....caucucugucugggguucg.....          | 1   | 0 | 1a2 |
| .....cauUucugucugggguucgagac.....      | 1   | 1 | 1a2 |
| .....caucucugucugggguucgagacc.....     | 1   | 0 | 1a2 |
| .....caucucugucugggguucgagaccg.....    | 1   | 0 | 1a2 |
| .....aucucugucugggguucg.....           | 1   | 1 | 1a2 |
| .....aucucugucugggguucg.....           | 1   | 0 | 1a2 |
| .....aucucugucugggguucgagacc.....      | 1   | 0 | 1a2 |
| .....ucucugucugggguucgagac.....        | 1   | 0 | 1a2 |
| .....cucugucucggguucgagaga.....        | 1   | 1 | 1a2 |
| .....cugucugggguucgagag.....           | 1   | 1 | 1a2 |
| .....cugucugggguucgagac.....           | 1   | 0 | 1a2 |
| .....cugucugggguucgagaccU.....         | 1   | 1 | 1a2 |
| .....ugucugggguucgagac.....            | 1   | 0 | 1a2 |
| .....guucgagaccgcgggCg.....            | 7   | 1 | 1a2 |
| .....guucgagaccgcgggCgcu.....          | 2   | 1 | 1a2 |
| .....guucgagaccgcgggugcuU.....         | 1   | 1 | 1a2 |
| .....guucgagaccgcgggugcuuacuga.....    | 1   | 0 | 1a2 |
| .....uucgagaccgcgggCgc.....            | 1   | 1 | 1a2 |
| .....ucgagaccgcgggCgcu.....            | 1   | 1 | 1a2 |

cuaccgggucggaguuagcucaagcgguuaccuccuacugcgggacuuucuaucuguccaucugugcgggguuucgagaccgcggggucuuacugacccuuuaug

|                                        |    |   |     |
|----------------------------------------|----|---|-----|
| .....cgagaccgcgggucuuacuga.....        | 1  | 0 | 1a2 |
| .....cgagaccgcgggucuuacugac.....       | 1  | 0 | 1a2 |
| .....cgagaccgcgggucuuacugacccu.....    | 1  | 0 | 1a2 |
| .....cgagaccgcgggucuuacugacccuu.....   | 2  | 0 | 1a2 |
| .....cgagaccgcgggucuuacugacccuuu.....  | 4  | 0 | 1a2 |
| .....cgagaccgcgggucuuacugacccuuuA...   | 1  | 1 | 1a2 |
| .....accgcgggucuuacugacccuu.....       | 1  | 0 | 1a2 |
| .....cggggucuuacugacc.....             | 1  | 0 | 1a2 |
| .....cggggucuuacugacccuA.....          | 1  | 1 | 1a2 |
| .....cggggucuuacuUaccuu.....           | 1  | 1 | 1a2 |
| .....cgcgggucuuacugacccuu.....         | 45 | 0 | 1a2 |
| .....cgcgggucuuacugacccuG.....         | 1  | 1 | 1a2 |
| .....cgcgggucuuacugacccuCu.....        | 1  | 1 | 1a2 |
| .....cgcgggucuuCugacccuu.....          | 1  | 1 | 1a2 |
| .....cggggucuuacugacccuuA.....         | 2  | 1 | 1a2 |
| .....Ugcgggucuuacugacccuu.....         | 1  | 1 | 1a2 |
| .....cgcgggucuuacugacccuAu.....        | 1  | 1 | 1a2 |
| .....cgcgggucuuacugacccuuu.....        | 34 | 0 | 1a2 |
| .....cgcgggucuuacugaAccuu.....         | 1  | 1 | 1a2 |
| .....cgcgggucuuacugacccuuuA...         | 4  | 1 | 1a2 |
| .....cgcgggucuuacugacccuuuu.....       | 3  | 0 | 1a2 |
| .....cggggucuuacugacccuuuuU.....       | 1  | 1 | 1a2 |
| .....cgggucuuacugacccuu.....           | 1  | 0 | 1a2 |
| .....cgggucggaguuagcucaagcgc.....      | 1  | 1 | j08 |
| .....cgggucggaguuagcucaagcgg.....      | 6  | 0 | j08 |
| .....cgggucggaguuagcucaagcgggu.....    | 8  | 0 | j08 |
| .....cgggucggaguuagcucaagcggA.....     | 2  | 1 | j08 |
| .....cgggucggaguuagcucaagcggC.....     | 1  | 1 | j08 |
| .....gggucggaguuagcucaagcgggu.....     | 5  | 0 | j08 |
| .....gggucggaguuagcucaagcggguAa.....   | 3  | 1 | j08 |
| .....cgcgggucuuacugacccuu.....         | 3  | 0 | j08 |
| .....cgggucggaguuagcucaagcgggu.....    | 1  | 0 | j12 |
| ..accgggucggaguuagc.....               | 1  | 0 | 1i2 |
| ..accgggucggaguuagA.....               | 1  | 1 | 1i2 |
| ..accgggucggaguuagcuc.....             | 2  | 0 | 1i2 |
| ..accgggucggaguuagcuca.....            | 2  | 0 | 1i2 |
| ..accgggucggaguuagcucaa.....           | 2  | 0 | 1i2 |
| ..accgggucggaguuagcucaaA.....          | 1  | 1 | 1i2 |
| ..accgggucggaguuagcucaag.....          | 7  | 0 | 1i2 |
| ..accgggucggaguuagcAcaagc.....         | 1  | 1 | 1i2 |
| ..accgggucggaguuagcucaagc.....         | 56 | 0 | 1i2 |
| ..accgggucggCguuagcucaagc.....         | 1  | 1 | 1i2 |
| ..accgggucggaguuagcucaagA.....         | 2  | 1 | 1i2 |
| ..aUccgggucggaguuagcucaagc.....        | 1  | 1 | 1i2 |
| ..accgggucggaguuagcucaagc.....         | 1  | 1 | 1i2 |
| ..accgggucggaguuagcucCagc.....         | 1  | 1 | 1i2 |
| ..accgggucggaguuagcucaagcg.....        | 4  | 0 | 1i2 |
| ..accgggucggaguuagcucaagcgg.....       | 26 | 0 | 1i2 |
| ..accgggucggaguuagcucaagcgA.....       | 2  | 1 | 1i2 |
| ..accgggucggCguuagcucaagcgg.....       | 1  | 1 | 1i2 |
| ..accgggucggaguuCgcucaagcgg.....       | 1  | 1 | 1i2 |
| ..accgggucggagAagcucaagcgggu.....      | 1  | 1 | 1i2 |
| ..accgggucggaguuagcucaagcgggu.....     | 24 | 0 | 1i2 |
| ..accgggucggaguuagcucaagcggguu.....    | 3  | 0 | 1i2 |
| ..accgggucggaguuagcucaagcgguuU.....    | 1  | 1 | 1i2 |
| ..accgggucggaguuagcucaagcgguuac.....   | 3  | 0 | 1i2 |
| ..accgggucggaguuagcucaagcgUuuac.....   | 1  | 1 | 1i2 |
| ..accgggucggaguuagcucaagcgguuacc.....  | 1  | 0 | 1i2 |
| ..accgggucggaguuagcucaagcgguuaccu..... | 1  | 0 | 1i2 |
| ..Accgggucggaguuagcuc.....             | 1  | 1 | 1i2 |
| ..Accgggucggaguuagcuca.....            | 1  | 1 | 1i2 |
| ..Accgggucggaguuagcucaag.....          | 1  | 1 | 1i2 |
| ..ccgggucggaguuagcucaag.....           | 1  | 0 | 1i2 |
| ..Accgggucggaguuagcucaagc.....         | 16 | 1 | 1i2 |
| ..ccgggucggaguuagcucaagc.....          | 11 | 0 | 1i2 |
| ..ccgggucggaguuagcucaagcg.....         | 12 | 0 | 1i2 |

cuaccgggucggaguuagcucaagcgguuaccuccuacugcggacuuucuaucuguccaucucugucgggguuucgagaccgcgggugcuuacugaccuuuuuug

|                                       |     |   |     |
|---------------------------------------|-----|---|-----|
| ...ccgggucggaguuagcucaaaUcg.....      | 1   | 1 | 112 |
| ...Accgggucggaguuagcucaagcg.....      | 11  | 1 | 112 |
| ...Accgggucggaguuagcucaagcgg.....     | 13  | 1 | 112 |
| ...ccgggucggaguuagcucaagcgg.....      | 19  | 0 | 112 |
| ...ccgggucggaguuagcucaagcggg.....     | 14  | 0 | 112 |
| ...ccgggucggaguuagcucaagcggA.....     | 1   | 1 | 112 |
| ...Accgggucggaguuagcucaagcggg.....    | 9   | 1 | 112 |
| ...ccgggucggaguuagcucaagcgguu.....    | 4   | 0 | 112 |
| ...ccgggucggaguuagcucaagcgguuU.....   | 1   | 1 | 112 |
| ...cGgggucggaguuagcuca.....           | 1   | 1 | 112 |
| ...ccgggucggaguuagcuca.....           | 2   | 0 | 112 |
| ...ccgggucggaguuagcucaa.....          | 1   | 0 | 112 |
| ...ccgggucggaguuagcucaag.....         | 1   | 0 | 112 |
| ...ccgggucggaguuagcucaCgc.....        | 1   | 1 | 112 |
| ...ccgggucggaguuagcCcaagc.....        | 1   | 1 | 112 |
| ...ccgggucAgaguuagcucaagc.....        | 1   | 1 | 112 |
| ...ccgggucggaguuagcucaagc.....        | 52  | 0 | 112 |
| ...ccgggucCgaguuagcucaagcg.....       | 1   | 1 | 112 |
| ...ccgggucggaguuagcucaagcgg.....      | 53  | 0 | 112 |
| ...ccgggucggaguuagGuaagcgg.....       | 1   | 1 | 112 |
| ...ccgggucggCguuagcucaagcgg.....      | 4   | 1 | 112 |
| ...ccgggucCggaguuagcucaagcgg.....     | 2   | 1 | 112 |
| ...Accgggucggaguuagcucaagcgg.....     | 2   | 1 | 112 |
| ...ccgggucggaguuagcucCagcgg.....      | 1   | 1 | 112 |
| ...cGgggucggaguuagcucaagcgg.....      | 1   | 1 | 112 |
| ...ccgggucggaguuagcucaagcggA.....     | 9   | 1 | 112 |
| ...ccggUucggaguuagcucaagcgg.....      | 1   | 1 | 112 |
| ...ccgggucggaguuuacCucaagcgg.....     | 1   | 1 | 112 |
| ...ccgggucggaguuagcuUaaagcgg.....     | 1   | 1 | 112 |
| ...ccgggucAgaguuagcucaagcgg.....      | 2   | 1 | 112 |
| ...ccgggucggaguuagcAcaagcgg.....      | 1   | 1 | 112 |
| ...ccgggucUgaguuagcucaagcgg.....      | 1   | 1 | 112 |
| ...ccgggucggaguuagcucaagcggC.....     | 1   | 1 | 112 |
| ...ccgggucggaguuagcucaGgcgg.....      | 1   | 1 | 112 |
| ...Ucgggucggaguuagcucaagcgg.....      | 3   | 1 | 112 |
| ...ccgggucggaguuagcucaagcggU.....     | 1   | 1 | 112 |
| ...ccgggucCgaguuagcucaagcgg.....      | 1   | 1 | 112 |
| ...ccgggGcggaguuagcucaagcgg.....      | 4   | 1 | 112 |
| ...ccgggucggaguuagcucaagUgg.....      | 1   | 1 | 112 |
| ...ccgggucggaguuagcucaagcgg.....      | 486 | 0 | 112 |
| ...ccgggucggGguuagcucaagcgg.....      | 1   | 1 | 112 |
| ...ccgggucggaguuagcucaagcAag.....     | 1   | 1 | 112 |
| ...ccgggucggaguuagcucaagcUg.....      | 1   | 1 | 112 |
| ...ccgggucggCguuagcucaagcggg.....     | 1   | 1 | 112 |
| ...ccgggucCgaguuagcucaagcggg.....     | 1   | 1 | 112 |
| ...ccgggucggaguuagUucaagcggg.....     | 1   | 1 | 112 |
| ...ccgggucggaguuagcucaagcggg.....     | 214 | 0 | 112 |
| ...Accgggucggaguuagcucaagcggg.....    | 3   | 1 | 112 |
| ...ccgggucggaguuagcucaagcggC.....     | 2   | 1 | 112 |
| ...ccgggGcggaguuagcucaagcggg.....     | 3   | 1 | 112 |
| ...ccgAgucggaguuagcucaagcggg.....     | 1   | 1 | 112 |
| ...cGgggucggaguuagcucaagcggg.....     | 4   | 1 | 112 |
| ...ccgggucggaguuagcCcaagcggg.....     | 1   | 1 | 112 |
| ...Ucgggucggaguuagcucaagcggg.....     | 1   | 1 | 112 |
| ...ccgggucggaguuagcucaCgcgg.....      | 1   | 1 | 112 |
| ...ccggCucggaguuagcucaagcggg.....     | 2   | 1 | 112 |
| ...ccgggucggaguuagcucaagcggA.....     | 3   | 1 | 112 |
| ...ccgggucggaguuagcucaagcggU.....     | 2   | 1 | 112 |
| ...ccgggucggaguuagcuUaaagcggg.....    | 1   | 1 | 112 |
| ...cGgggucggaguuagcucaagcggg.....     | 4   | 1 | 112 |
| ...ccgggucggaguuagcucaagcgggG.....    | 2   | 1 | 112 |
| ...ccgggucggaguuagcucaagcgggC.....    | 1   | 1 | 112 |
| ...ccgggucggaguuagcucaagcgggA.....    | 3   | 1 | 112 |
| ...ccgggucggaguuagcucaagcggg.....     | 20  | 0 | 112 |
| ...ccgggucggaguuagcucaagcgggAa.....   | 1   | 1 | 112 |
| ...ccgggucggaguuagcucaagcgggU.....    | 8   | 1 | 112 |
| ...ccgggucggaguuagcucaagcgggUua.....  | 2   | 0 | 112 |
| ...ccgggucggaguuagcucaagcgggUac.....  | 1   | 0 | 112 |
| ...ccgggucggaguuagcucaagcgggUuaU..... | 1   | 1 | 112 |

cuaccgggucgggaguuagcucaagcgguuaccuccuacugcgggacuuucuaucuguccaucucugugcgggguuucgagaccgcggggugcuuacugaccuuuuuag

|                                    |     |   |     |
|------------------------------------|-----|---|-----|
| .....cgggucgggaguuagcuca.....      | 8   | 0 | 112 |
| .....cgggucgggaguuagcucaa.....     | 8   | 0 | 112 |
| .....cgggucgggaguuagcucaaa.....    | 1   | 1 | 112 |
| .....cgggucgggCguuagcucaag.....    | 1   | 1 | 112 |
| .....cgggucgggaguuagcucaag.....    | 21  | 0 | 112 |
| .....cgggucgggUguuagcucaagc.....   | 1   | 1 | 112 |
| .....cggguuAggaguuagcucaagc.....   | 1   | 1 | 112 |
| .....cgggucgggaguuagcGcaagc.....   | 1   | 1 | 112 |
| .....cgggucgggGguuagcucaagc.....   | 1   | 1 | 112 |
| .....cgggucAgaguuagcucaagc.....    | 1   | 1 | 112 |
| .....cAggucgggaguuagcucaagc.....   | 1   | 1 | 112 |
| .....cgggucgggaguuagcucaagc.....   | 380 | 0 | 112 |
| .....cgggucgggaguuGgcucaagc.....   | 1   | 1 | 112 |
| .....cgggucgggaguuagcuUaagc.....   | 1   | 1 | 112 |
| .....cgggAcgggaguuagcucaagc.....   | 1   | 1 | 112 |
| .....cgggucgggaguuagcucCagc.....   | 1   | 1 | 112 |
| .....Ugggucgggaguuagcucaagc.....   | 1   | 1 | 112 |
| .....cgggucgggaguuagcucaagU.....   | 2   | 1 | 112 |
| .....cgggucgggCguuagcucaagc.....   | 2   | 1 | 112 |
| .....cgggucgggaguuagcucaagA.....   | 3   | 1 | 112 |
| .....cUggucgggaguuagcucaagc.....   | 1   | 1 | 112 |
| .....cgggucgggaguuCagcucaagc.....  | 1   | 1 | 112 |
| .....cgggucgggGuaagcucaagc.....    | 1   | 1 | 112 |
| .....cgggGcgggaguuagcucaagc.....   | 3   | 1 | 112 |
| .....cgAgucgggaguuagcucaagc.....   | 2   | 1 | 112 |
| .....cgggucgggaguuagUucaagc.....   | 1   | 1 | 112 |
| .....cgCgucgggaguuagcucaagc.....   | 1   | 1 | 112 |
| .....cgggucgAguuagcucaagc.....     | 1   | 1 | 112 |
| .....cgggucgggaguuagcucaaUcg.....  | 1   | 1 | 112 |
| .....cgggucgggCguuagcucaagc.....   | 4   | 1 | 112 |
| .....cUggucgggaguuagcucaagc.....   | 1   | 1 | 112 |
| .....cgggucgggaguuCgcucaagc.....   | 2   | 1 | 112 |
| .....cgggucgggaguuagcCcaagc.....   | 1   | 1 | 112 |
| .....cgggucgggaguuagcucaagUg.....  | 2   | 1 | 112 |
| .....cgggucgggaguuagcucCagc.....   | 2   | 1 | 112 |
| .....cgggucgggaguuagcucaagcA.....  | 9   | 1 | 112 |
| .....cgggucgggagCuagcucaagc.....   | 2   | 1 | 112 |
| .....cgggucAgaguuagcucaagc.....    | 3   | 1 | 112 |
| .....Ugggucgggaguuagcucaagc.....   | 2   | 1 | 112 |
| .....cAggucgggaguuagcucaagc.....   | 1   | 1 | 112 |
| .....cgggucgggaguuagcuUaagc.....   | 1   | 1 | 112 |
| .....cgggucgggaguuAucucaagc.....   | 1   | 1 | 112 |
| .....cCggucgggaguuagcucaagc.....   | 1   | 1 | 112 |
| .....cgggucgggaguuagcucaagcU.....  | 4   | 1 | 112 |
| .....cgggucgggaguuagUucaagc.....   | 1   | 1 | 112 |
| .....cgggGcgggaguuagcucaagc.....   | 8   | 1 | 112 |
| .....cgggucgggaguuagcucaagc.....   | 703 | 0 | 112 |
| .....cgggCcggaguuagcucaagc.....    | 2   | 1 | 112 |
| .....cgggucgggaguuagcucaagcC.....  | 1   | 1 | 112 |
| .....cgggucgggaguuagcucaagcA.....  | 110 | 1 | 112 |
| .....cgggCcgggaguuagcucaagcgg..... | 34  | 1 | 112 |
| .....cgggucgggaguuAucucaagcgg..... | 4   | 1 | 112 |
| .....cgggucgggaguuagcCcaagcgg..... | 10  | 1 | 112 |
| .....cgggucgggaguuagcucaagGgg..... | 3   | 1 | 112 |
| .....cgggucgggaguuUgcucaagcgg..... | 2   | 1 | 112 |
| .....cggCucgggaguuagcucaagcgg..... | 5   | 1 | 112 |
| .....cgUgucgggaguuagcucaagcgg..... | 2   | 1 | 112 |
| .....cgggucgggaguuGgcucaagcgg..... | 3   | 1 | 112 |
| .....cgggucgggaguuagcuUgcgg.....   | 1   | 1 | 112 |
| .....cgggucgggCguuagcucaagcgg..... | 15  | 1 | 112 |
| .....cgggucgggaguuagcuUaagcgg..... | 11  | 1 | 112 |
| .....cgggucCgaguuagcucaagcgg.....  | 3   | 1 | 112 |
| .....cUggucgggaguuagcucaagcgg..... | 14  | 1 | 112 |
| .....cgggucgggaguuagcucaagcUg..... | 5   | 1 | 112 |
| .....Ggggucgggaguuagcucaagcgg..... | 15  | 1 | 112 |
| .....cgggucgggaguuagcucaagcG.....  | 50  | 1 | 112 |
| .....cgggucgggaguuagcAcaagcgg..... | 3   | 1 | 112 |
| .....cgggucgggaguuagcucaagAgg..... | 13  | 1 | 112 |
| .....cgggucgggAuuagcucaagcgg.....  | 6   | 1 | 112 |

cuaccgggucgggaguuagcucaagcgguuaccuccuacugcggacuuucuaucuguccaucucugucgggguuucgagaccgcgggugcuuacugaccuuuuuag

|                                     |       |   |     |
|-------------------------------------|-------|---|-----|
| .....cgggucgggaguuagcGcaagcgg.....  | 1     | 1 | 112 |
| .....cgggucgggagucCagcucaagcgg..... | 17    | 1 | 112 |
| .....Ugggucgggaguuagcucaagcgg.....  | 23    | 1 | 112 |
| .....cgggucgggaguuagcucaagcGg.....  | 5     | 1 | 112 |
| .....cgggucgggaguuagcucaGgcgg.....  | 3     | 1 | 112 |
| .....cgggucgggaguuagcucGagcgg.....  | 3     | 1 | 112 |
| .....cgggucgggaguuagcucaagUgg.....  | 11    | 1 | 112 |
| .....cgggucgggaguuAucucaagcgg.....  | 2     | 1 | 112 |
| .....cgggucggGguuagcucaagcgg.....   | 16    | 1 | 112 |
| .....cgggucggUguuagcucaagcgg.....   | 3     | 1 | 112 |
| .....cGggucgggaguuagcucaagcgg.....  | 10    | 1 | 112 |
| .....cgggucgggaguuagcucaagcgg.....  | 9300  | 0 | 112 |
| .....cgggucgggAUuuagcucaagcgg.....  | 2     | 1 | 112 |
| .....cggguGggaguuagcucaagcgg.....   | 1     | 1 | 112 |
| .....cgggucgggaguuagcucaCgcgg.....  | 10    | 1 | 112 |
| .....cgggucgggaguuagcucaagcAg.....  | 4     | 1 | 112 |
| .....cgggucAggaguuagcucaagcgg.....  | 2     | 1 | 112 |
| .....cgggucUgaguuagcucaagcgg.....   | 1     | 1 | 112 |
| .....cAggucgggaguuagcucaagcgg.....  | 6     | 1 | 112 |
| .....cgggucgggaguuagcucaaAcgg.....  | 3     | 1 | 112 |
| .....cgggucgggaguuagcuGaacgg.....   | 2     | 1 | 112 |
| .....cgAucgggaguuagcucaagcgg.....   | 2     | 1 | 112 |
| .....cgggucGcaguuagcucaagcgg.....   | 4     | 1 | 112 |
| .....Agggucgggaguuagcucaagcgg.....  | 9     | 1 | 112 |
| .....cgggucgggagCuagcucaagcgg.....  | 9     | 1 | 112 |
| .....cggUucgggaguuagcucaagcgg.....  | 10    | 1 | 112 |
| .....cgggucgggACuuagcucaagcgg.....  | 2     | 1 | 112 |
| .....cggguUggaguuagcucaagcgg.....   | 9     | 1 | 112 |
| .....cgggucgggaguuagcucaagcGU.....  | 72    | 1 | 112 |
| .....cgggucgggaguuagcucUagcgg.....  | 2     | 1 | 112 |
| .....cgggucgggaguuagAUcaagcgg.....  | 3     | 1 | 112 |
| .....cgggucgggaguuAUcucaagcgg.....  | 5     | 1 | 112 |
| .....cgggucgggagGUagcucaagcgg.....  | 6     | 1 | 112 |
| .....cgggucgggaguuagcucaaCcg.....   | 4     | 1 | 112 |
| .....cgggucgggaguuagGUcaagcgg.....  | 3     | 1 | 112 |
| .....cgggucgggaguuagUucaagcgg.....  | 5     | 1 | 112 |
| .....cggAucgggaguuagcucaagcgg.....  | 5     | 1 | 112 |
| .....cgggucgggaguuagcucaaUcgg.....  | 21    | 1 | 112 |
| .....cgggucgggaguuAagcucaagcgg..... | 1     | 1 | 112 |
| .....cgggucgggaguuagcuAaagcgg.....  | 2     | 1 | 112 |
| .....cgggAcggaguuagcucaagcgg.....   | 14    | 1 | 112 |
| .....cgggucAgaguuagcucaagcgg.....   | 14    | 1 | 112 |
| .....cgggucgUaguuagcucaagcgg.....   | 17    | 1 | 112 |
| .....cgggGcgggaguuagcucaagcgg.....  | 84    | 1 | 112 |
| .....cgggucgggaguuCgcucaagcgg.....  | 4     | 1 | 112 |
| .....cgggucgggaguuagcucCagcgg.....  | 27    | 1 | 112 |
| .....cgggucgggagAUagcucaagcgg.....  | 3     | 1 | 112 |
| .....cgggucCgaguuagcucaagcgg.....   | 9     | 1 | 112 |
| .....cgggucGcaguuagcucaagcgg.....   | 7     | 1 | 112 |
| .....cAggucgggaguuagcucaagcgg.....  | 9     | 1 | 112 |
| .....cgggucgggaguuagcucaCgcgg.....  | 26    | 1 | 112 |
| .....cgggucgggaguuAagcucaagcgg..... | 2     | 1 | 112 |
| .....cgggucgggaguuagcucaagcGU.....  | 53    | 1 | 112 |
| .....cgggucgggaguuagcucaagcgg.....  | 24404 | 0 | 112 |
| .....cgggucgggaguuagcucaGgcgg.....  | 7     | 1 | 112 |
| .....cgggucgggaguuAucucaagcgg.....  | 11    | 1 | 112 |
| .....cgggucgggaguuagUucaagcgg.....  | 13    | 1 | 112 |
| .....cggguGggaguuagcucaagcgg.....   | 4     | 1 | 112 |
| .....cgggucgggaguuagAUcaagcgg.....  | 8     | 1 | 112 |
| .....cgUgucgggaguuagcucaagcgg.....  | 13    | 1 | 112 |
| .....cgggucgggaguuagcuUaagcgg.....  | 13    | 1 | 112 |
| .....cgggucgggaguuagcucaagcUgu..... | 15    | 1 | 112 |
| .....cgggucgggaguuagcucUagcgg.....  | 3     | 1 | 112 |
| .....cgggucgggaguuagcucaagcAgu..... | 7     | 1 | 112 |
| .....cgggucgggaguuagcuAaagcgg.....  | 4     | 1 | 112 |
| .....cgggucAgaguuagcucaagcgg.....   | 55    | 1 | 112 |
| .....cgggucgggaguuagcucaaUcgg.....  | 38    | 1 | 112 |
| .....cgggucgggaguuagcucGagcgg.....  | 13    | 1 | 112 |
| .....cgggucgggaguuCgcucaagcgg.....  | 15    | 1 | 112 |

cuaccgggucgggaguuagcucaagcgguuaccuccuacugcgggacuuucuaucuguccaucucugugcgggguuucgagaccgcgggugcuuacugaccuuuuuag

|                                       |     |   |     |
|---------------------------------------|-----|---|-----|
| .....cgggucgggaguuagcCcaagcgggu.....  | 29  | 1 | 112 |
| .....cgggucgggaguuagcucCagcgggu.....  | 53  | 1 | 112 |
| .....cgggucgggaguuauUcucaagcgggu..... | 15  | 1 | 112 |
| .....cgggucgggaguuagcGcaagcgggu.....  | 2   | 1 | 112 |
| .....cgggucgggGguuagcucaagcgggu.....  | 15  | 1 | 112 |
| .....cgAucgggaguuagcucaagcgggu.....   | 9   | 1 | 112 |
| .....cgggAcgggaguuagcucaagcgggu.....  | 34  | 1 | 112 |
| .....cgggucgggagucCagcucaagcgggu..... | 26  | 1 | 112 |
| .....cgggucgggaguuGgcucaagcgggu.....  | 11  | 1 | 112 |
| .....cgggucgggaguuUgcucaagcgggu.....  | 1   | 1 | 112 |
| .....cgggucgggaguuagcucaagcgggu.....  | 3   | 1 | 112 |
| .....cgggucAggaguuagcucaagcgggu.....  | 5   | 1 | 112 |
| .....Agggucgggaguuagcucaagcgggu.....  | 14  | 1 | 112 |
| .....cgggucgggCguuagcucaagcgggu.....  | 23  | 1 | 112 |
| .....cgggucgggaguuagcAcaagcgggu.....  | 7   | 1 | 112 |
| .....cgggucgggagGuaagcucaagcgggu..... | 10  | 1 | 112 |
| .....cgggucgggaguuagcucaagUggu.....   | 12  | 1 | 112 |
| .....cgggucgggaguuagcucaagcggcC.....  | 187 | 1 | 112 |
| .....cgggucgggagCuagcucaagcgggu.....  | 17  | 1 | 112 |
| .....cggUucgggaguuagcucaagcgggu.....  | 14  | 1 | 112 |
| .....cgggucgggaguuagcucaagcgggA.....  | 292 | 1 | 112 |
| .....cgggucgggAUuuagcucaagcgggu.....  | 10  | 1 | 112 |
| .....Ugggucgggaguuagcucaagcgggu.....  | 51  | 1 | 112 |
| .....Ggggucgggaguuagcucaagcgggu.....  | 43  | 1 | 112 |
| .....cgggGcgggaguuagcucaagcgggu.....  | 202 | 1 | 112 |
| .....cgggucgggAUuuagcucaagcgggu.....  | 14  | 1 | 112 |
| .....cgggucgggaguuagcucaaaAcgggu..... | 7   | 1 | 112 |
| .....cgggucgggaguuagGuaagcgggu.....   | 4   | 1 | 112 |
| .....cgggucUgaguuagcucaagcgggu.....   | 10  | 1 | 112 |
| .....cgggucgggUguuagcucaagcgggu.....  | 5   | 1 | 112 |
| .....cgggucgAaguuagcucaagcgggu.....   | 2   | 1 | 112 |
| .....cgggucgggagAuaagcucaagcgggu..... | 8   | 1 | 112 |
| .....cgggucgggaguuagcucaagAggu.....   | 23  | 1 | 112 |
| .....cgggucgggaguuagcucaagcggCu.....  | 3   | 1 | 112 |
| .....cCggucgggaguuagcucaagcgggu.....  | 6   | 1 | 112 |
| .....cgggucgggaguuagcucaagcggG.....   | 89  | 1 | 112 |
| .....cgggucgggaguuagcuGaaagcgggu..... | 2   | 1 | 112 |
| .....cgggucgggACuuagcucaagcgggu.....  | 11  | 1 | 112 |
| .....cgggucUggaguuagcucaagcgggu.....  | 30  | 1 | 112 |
| .....cgggucgggaguuACcucaagcgggu.....  | 14  | 1 | 112 |
| .....cggAucgggaguuagcucaagcgggu.....  | 7   | 1 | 112 |
| .....cgggucgUaguuagcucaagcgggu.....   | 35  | 1 | 112 |
| .....cggCucgggaguuagcucaagcgggu.....  | 11  | 1 | 112 |
| .....cgCgucgggaguuagcucaagcgggu.....  | 8   | 1 | 112 |
| .....cUggucgggaguuagcucaagcgggu.....  | 19  | 1 | 112 |
| .....cgggucgggaguuagcucaaaCcggu.....  | 15  | 1 | 112 |
| .....cgggucgggaguuagcucaUgcgggu.....  | 2   | 1 | 112 |
| .....cgggCcggaguuagcucaagcgggu.....   | 73  | 1 | 112 |
| .....cgggucgggaguuagcucaagcCgu.....   | 7   | 1 | 112 |
| .....cggCucgggaguuagcucaagcggguu..... | 3   | 1 | 112 |
| .....cgggucgggaguuagcucaagcggUuu..... | 13  | 1 | 112 |
| .....cgggucgggaguuagcucGagcgggu.....  | 5   | 1 | 112 |
| .....cgggucgggaguuagcuUaagcgggu.....  | 1   | 1 | 112 |
| .....cgggucgggaguuUgcucaagcgggu.....  | 2   | 1 | 112 |
| .....cggUucgggaguuagcucaagcgggu.....  | 4   | 1 | 112 |
| .....cgggucgCaguagcucaagcgggu.....    | 2   | 1 | 112 |
| .....cgggucgggaguuAacuagcgggu.....    | 2   | 1 | 112 |
| .....cgggAcgggaguuagcucaagcgggu.....  | 5   | 1 | 112 |
| .....cgggucgggaguuagcucaagcggCu.....  | 8   | 1 | 112 |
| .....cgggGcgggaguuagcucaagcgggu.....  | 27  | 1 | 112 |
| .....cgggucgggagAuaagcucaagcgggu..... | 1   | 1 | 112 |
| .....cgggucgggaguuagUucaagcgggu.....  | 2   | 1 | 112 |
| .....cgggucUgaguuagcucaagcgggu.....   | 1   | 1 | 112 |
| .....cgggucgggaguuagcucCagcgggu.....  | 2   | 1 | 112 |
| .....Ggggucgggaguuagcucaagcgggu.....  | 10  | 1 | 112 |
| .....cgggucgggaguuagcucaagcAgu.....   | 1   | 1 | 112 |
| .....cgggucgggaguuCgcucaagcgggu.....  | 2   | 1 | 112 |
| .....cAggucgggaguuagcucaagcgggu.....  | 3   | 1 | 112 |
| .....cgggucgggCguuagcucaagcgggu.....  | 8   | 1 | 112 |



cuaccgggucgggaguuagcucaagcgguuuaccuccuacugcgggacuuucuaucuguccaucucugugcgggguucgagaccgcgggugcuuacugaccuuuuuag

|                                       |      |   |     |
|---------------------------------------|------|---|-----|
| .....cgggucgggaguuagcucaagcggua.....  | 659  | 1 | 112 |
| .....cgAgucgggaguuagcucaagcgguu.....  | 1    | 1 | 112 |
| .....cUggucgggaguuagcucaagcgguu.....  | 1    | 1 | 112 |
| .....cgggucgggaguuagcucaagcGcu.....   | 1    | 1 | 112 |
| .....cgggucgggaguuagcucaCgcgguu.....  | 1    | 1 | 112 |
| .....cgggucgggaguuUfcuacgcgguu.....   | 2    | 1 | 112 |
| .....cgggucgggaguuagcucaagcggG.....   | 15   | 1 | 112 |
| .....cgggucCgaguuagcucaagcgguu.....   | 1    | 1 | 112 |
| .....Agggucgggaguuagcucaagcgguu.....  | 1    | 1 | 112 |
| .....cgggucgggaguCagcucaagcgguu.....  | 3    | 1 | 112 |
| .....cgggucgggaguuagcucaagcggGu.....  | 10   | 1 | 112 |
| .....cgggucgggAuuagcucaagcgguu.....   | 2    | 1 | 112 |
| .....cgggucgggaguuagcucaaCcggu.....   | 1    | 1 | 112 |
| .....cgggucgggaguuagcucaagcgguu.....  | 2788 | 0 | 112 |
| .....cgggucgggagCuagcucaagcgguu.....  | 5    | 1 | 112 |
| .....cgggucgUaguuagcucaagcgguu.....   | 3    | 1 | 112 |
| .....cgggucggGguuagcucaagcgguu.....   | 1    | 1 | 112 |
| .....cgggCcgaguuagcucaagcgguu.....    | 10   | 1 | 112 |
| .....cgggucgggaguuagcucaagcggAu.....  | 17   | 1 | 112 |
| .....cggguUggaguuagcucaagcgguu.....   | 2    | 1 | 112 |
| .....cgggucgggaguuagcucaaAcggu.....   | 1    | 1 | 112 |
| .....cgggucAgaguuagcucaagcgguu.....   | 6    | 1 | 112 |
| .....cgggucgggaguuagcucaagUgguu.....  | 1    | 1 | 112 |
| .....cCggucgggaguuagcucaagcgguu.....  | 1    | 1 | 112 |
| .....cgggucgggaguuagcCcaagcgguu.....  | 5    | 1 | 112 |
| .....cgggucgggaguuagcucaagcgguC.....  | 12   | 1 | 112 |
| .....cgggucgggaguuagcucaGcggu.....    | 1    | 1 | 112 |
| .....cggguAggaguuagcucaagcgguu.....   | 3    | 1 | 112 |
| .....cgggucgggaguuagcucaaUcggu.....   | 5    | 1 | 112 |
| .....cgggucgggaguuagcAcaagcgguu.....  | 1    | 1 | 112 |
| .....Ugggucgggaguuagcucaagcgguu.....  | 3    | 1 | 112 |
| .....cgAgucgggaguuagcucaagcgguu.....  | 1    | 1 | 112 |
| .....cgggucgggaguuagcucaagcggGu.....  | 1    | 1 | 112 |
| .....cgggucgggaguuagcucaagcgguuG..... | 5    | 1 | 112 |
| .....cgggGcggaguuagcucaagcgguu.....   | 1    | 1 | 112 |
| .....Ugggucgggaguuagcucaagcgguu.....  | 1    | 1 | 112 |
| .....cgggucgggaguuagcucaagcgguaA..... | 152  | 1 | 112 |
| .....cgggucgggaguuagcucaagcggG.....   | 7    | 1 | 112 |
| .....cgggucgggaguuagcucaagcgguu.....  | 1    | 1 | 112 |
| .....cgggucgggaguuagcucaagcgguu.....  | 6    | 1 | 112 |
| .....cgggucgggaguuagcucaagcgguu.....  | 798  | 1 | 112 |
| .....cgggucgggaguuagcucaagcgguu.....  | 1    | 1 | 112 |
| .....cgggucgggaguuagcucaagcgguu.....  | 107  | 0 | 112 |
| .....cgggucgggaguuagcucaagcgguu.....  | 6    | 0 | 112 |
| .....cgggucgggaguuagcucaagcgguu.....  | 2    | 1 | 112 |
| .....cgggucgggaguuagcucaagcgguu.....  | 2    | 1 | 112 |
| .....cgggucgggaguuagcucaagcgguu.....  | 2    | 1 | 112 |
| .....cgggucgggaguuagcucaagcgguu.....  | 55   | 1 | 112 |
| .....cgggucgggaguuagcucaagcgguu.....  | 24   | 1 | 112 |
| .....cgggucgggaguuagcucaagcgguu.....  | 1    | 1 | 112 |
| .....cgggucgggaguuagcucaagcgguu.....  | 1    | 0 | 112 |
| .....cgggucgggaguuagcucaagcgguu.....  | 1    | 0 | 112 |
| .....gggucgggaguuagcucaag.....        | 1    | 0 | 112 |
| .....gggucgggaguuagcucaagc.....       | 14   | 0 | 112 |
| .....gggucgggaguuCgcuaagc.....        | 1    | 1 | 112 |
| .....gggucgggaguuagcucaagA.....       | 1    | 1 | 112 |
| .....gggucgggaguuagcucaagA.....       | 2    | 1 | 112 |
| .....gggucgggaguuagcucaagc.....       | 7    | 0 | 112 |
| .....gggucgggaguuagcucaCgcgg.....     | 1    | 1 | 112 |
| .....gggucgggaguuCgcuaagcgg.....      | 1    | 1 | 112 |
| .....gggucgggaguuagcucaagcgg.....     | 1    | 1 | 112 |
| .....gggucgggaguuagcucaagcgg.....     | 180  | 0 | 112 |
| .....Uggucgggaguuagcucaagcgg.....     | 1    | 1 | 112 |
| .....gggucgggaguuagcucCagcgg.....     | 1    | 1 | 112 |
| .....gggucgggaguuagcucaagcggU.....    | 1    | 1 | 112 |
| .....gggucgggaguuagcCcaagcgg.....     | 1    | 1 | 112 |
| .....gggucgggaguuagcucaagcCg.....     | 1    | 1 | 112 |
| .....gggucgggaguuagcucaagcgg.....     | 1    | 1 | 112 |
| .....Cggucgggaguuagcucaagcgg.....     | 8    | 1 | 112 |

cuaccgggucggaguuagcucaagcgguuaccuccuacugcggacuucuaucuguccaucucugugcgggguuucgagaccgcgggugcuuacugaccuuuuuug

|                                           |     |   |     |
|-------------------------------------------|-----|---|-----|
| .....gggucggaguuagcucaagcgcC.....         | 2   | 1 | 112 |
| .....gggucggaguuagcucaagcggG.....         | 2   | 1 | 112 |
| .....gggucggaguuagcucaaaAcggu.....        | 2   | 1 | 112 |
| .....gggucggaguuagcucaUgcggu.....         | 1   | 1 | 112 |
| .....gggucggaguuagcucaaCcggu.....         | 1   | 1 | 112 |
| .....gggucggaguuagcucaCgcggu.....         | 3   | 1 | 112 |
| .....ggguUggaguuagcucaagcgggu.....        | 1   | 1 | 112 |
| .....gggucggaguuagAucaagcgggu.....        | 1   | 1 | 112 |
| .....Cggucggaguuagcucaagcgggu.....        | 7   | 1 | 112 |
| .....Uggucggaguuagcucaagcgggu.....        | 1   | 1 | 112 |
| .....gggucggaguuagcucaagcAgu.....         | 1   | 1 | 112 |
| .....gggucggaguuCgcucaagcgggu.....        | 2   | 1 | 112 |
| .....gggucggaguuagcucaagcggC.....         | 8   | 1 | 112 |
| .....gggucggaguuagcucaagcUgu.....         | 2   | 1 | 112 |
| .....gggucgUaguuagcucaagcgggu.....        | 1   | 1 | 112 |
| .....gggucggaguuagcucaagUggu.....         | 1   | 1 | 112 |
| .....gggucUgaguuagcucaagcgggu.....        | 1   | 1 | 112 |
| .....gggCcgaguuagcucaagcgggu.....         | 5   | 1 | 112 |
| .....gggucggAuuagcucaagcgggu.....         | 2   | 1 | 112 |
| .....gggucggaguuagcucaagcgggu.....        | 960 | 0 | 112 |
| .....gggGcggaguuagcucaagcgggu.....        | 2   | 1 | 112 |
| .....gggucggaguuagcCcaagcgggu.....        | 1   | 1 | 112 |
| .....gUgucggaguuagcucaagcgggu.....        | 1   | 1 | 112 |
| .....gggucggaguuagcucaGgcggu.....         | 2   | 1 | 112 |
| .....gggucggagCuagcucaagcgggu.....        | 3   | 1 | 112 |
| .....gggucggaguuagcuUaagcgggu.....        | 4   | 1 | 112 |
| .....gggucggaguuagcucCagcgggu.....        | 1   | 1 | 112 |
| .....gggucAgaguuagcucaagcgggu.....        | 2   | 1 | 112 |
| .....gggucggCguuagcucaagcgggu.....        | 2   | 1 | 112 |
| .....gggucggaguuagcucaagcggA.....         | 10  | 1 | 112 |
| .....gggucggaguuCagcucaagcgggu.....       | 1   | 1 | 112 |
| .....gggucggaguuagGuaagcgggu.....         | 1   | 1 | 112 |
| .....gggucggaguuagcucaagcggguA.....       | 46  | 1 | 112 |
| .....gggucggaguuagcucaagcggguC.....       | 1   | 1 | 112 |
| .....gggGcggaguuagcucaagcggguu.....       | 4   | 1 | 112 |
| .....gggucggaguuagcucaagGggu.....         | 1   | 1 | 112 |
| .....gggucggaguuagcucaaUcggu.....         | 1   | 1 | 112 |
| .....Uggucggaguuagcucaagcgggu.....        | 2   | 1 | 112 |
| .....gggucggaguuagcuUaagcgggu.....        | 1   | 1 | 112 |
| .....gggucggaguuagcucaagcgggu.....        | 293 | 0 | 112 |
| .....gggucggaguuagcCcaagcgggu.....        | 1   | 1 | 112 |
| .....gggucggaguuagcucCagcgggu.....        | 1   | 1 | 112 |
| .....gggucggaguuagcAcaagcgggu.....        | 1   | 1 | 112 |
| .....gggucggaguuCgcucaagcgggu.....        | 3   | 1 | 112 |
| .....gggucggaguuagcucaagcggGu.....        | 1   | 1 | 112 |
| .....Cggucggaguuagcucaagcgggu.....        | 3   | 1 | 112 |
| .....gggucggCguuagcucaagcgggu.....        | 1   | 1 | 112 |
| .....gggucggaguuagcucaCgcggu.....         | 1   | 1 | 112 |
| .....gggucggaguuagcucGagcgggu.....        | 1   | 1 | 112 |
| .....gggCcgaguuagcucaagcgggu.....         | 1   | 1 | 112 |
| .....gggucggaguuagcucaagcAgu.....         | 1   | 1 | 112 |
| .....gggucggaguuagcucaagcgguuU.....       | 145 | 1 | 112 |
| .....gggucggaguuagcucaagcgguu.....        | 22  | 0 | 112 |
| .....gggucggaguuagcucaagcgguuA.....       | 2   | 1 | 112 |
| .....gggucggaguuagcucaagcgguuac.....      | 11  | 0 | 112 |
| .....gggucggaguuagcucaagcgguuUc.....      | 1   | 1 | 112 |
| .....gUgucggaguuagcucaagcgguuac.....      | 1   | 1 | 112 |
| .....gggucAgaguuagcucaagcgguuac.....      | 1   | 1 | 112 |
| .....gggucggaguuagcucaagcgguuA.....       | 1   | 1 | 112 |
| .....gggucggaguuagcucaagcgguuacA.....     | 2   | 1 | 112 |
| .....gggucggaguuagcucaagcgguuacc.....     | 6   | 0 | 112 |
| .....gggucggaguuagcucaagcgguuaccu.....    | 1   | 0 | 112 |
| .....gggucggaguuagcucaagcgguuaccucc.....  | 2   | 0 | 112 |
| .....gggucggaguuagcucaagcgguuaccuccc..... | 2   | 0 | 112 |
| .....ggGcggaguuagcucaagcgc.....           | 1   | 1 | 112 |
| .....Ugucggaguuagcucaagcgggu.....         | 1   | 1 | 112 |
| .....ggucggaguuagcucaagcgggu.....         | 3   | 0 | 112 |
| .....ggucggaguuagcucaagcgggu.....         | 4   | 0 | 112 |
| .....ggucggaguuagcucaagcggguacc.....      | 1   | 0 | 112 |



cuaccgggucggaguuagcucaagcgguuaccuccuacugcggacuucuaucuguccaucucugucgggguuucgagaccgcgggugcuuacugaccuuuuuag

|           |     |   |     |
|-----------|-----|---|-----|
| . . . . . | 1   | 1 | va3 |
| . . . . . | 1   | 1 | va3 |
| . . . . . | 1   | 1 | va3 |
| . . . . . | 39  | 0 | va3 |
| . . . . . | 1   | 1 | va3 |
| . . . . . | 1   | 1 | va3 |
| . . . . . | 1   | 1 | va3 |
| . . . . . | 1   | 1 | va3 |
| . . . . . | 26  | 0 | va3 |
| . . . . . | 1   | 1 | va3 |
| . . . . . | 2   | 0 | va3 |
| . . . . . | 1   | 1 | va3 |
| . . . . . | 1   | 0 | va3 |
| . . . . . | 2   | 1 | va3 |
| . . . . . | 2   | 0 | va3 |
| . . . . . | 1   | 1 | va3 |
| . . . . . | 1   | 1 | va3 |
| . . . . . | 2   | 0 | va3 |
| . . . . . | 1   | 1 | va3 |
| . . . . . | 2   | 1 | va3 |
| . . . . . | 1   | 1 | va3 |
| . . . . . | 1   | 1 | va3 |
| . . . . . | 2   | 0 | va3 |
| . . . . . | 1   | 1 | va3 |
| . . . . . | 13  | 0 | va3 |
| . . . . . | 21  | 0 | va3 |
| . . . . . | 1   | 1 | va3 |
| . . . . . | 2   | 1 | va3 |
| . . . . . | 1   | 1 | va3 |
| . . . . . | 12  | 0 | va3 |
| . . . . . | 3   | 0 | va3 |
| . . . . . | 1   | 1 | va3 |
| . . . . . | 3   | 0 | va3 |
| . . . . . | 1   | 0 | va3 |
| . . . . . | 2   | 0 | va3 |
| . . . . . | 1   | 0 | va3 |
| . . . . . | 5   | 0 | va3 |
| . . . . . | 1   | 1 | va3 |
| . . . . . | 1   | 1 | va3 |
| . . . . . | 1   | 1 | va3 |
| . . . . . | 1   | 1 | va3 |
| . . . . . | 176 | 0 | va3 |
| . . . . . | 3   | 1 | va3 |
| . . . . . | 1   | 1 | va3 |
| . . . . . | 1   | 1 | va3 |
| . . . . . | 1   | 1 | va3 |
| . . . . . | 2   | 1 | va3 |
| . . . . . | 2   | 1 | va3 |
| . . . . . | 2   | 1 | va3 |
| . . . . . | 1   | 1 | va3 |
| . . . . . | 1   | 1 | va3 |
| . . . . . | 5   | 1 | va3 |
| . . . . . | 1   | 1 | va3 |
| . . . . . | 12  | 1 | va3 |
| . . . . . | 1   | 1 | va3 |
| . . . . . | 2   | 1 | va3 |
| . . . . . | 1   | 1 | va3 |
| . . . . . | 1   | 1 | va3 |
| . . . . . | 1   | 1 | va3 |
| . . . . . | 2   | 1 | va3 |
| . . . . . | 2   | 1 | va3 |
| . . . . . | 356 | 0 | va3 |
| . . . . . | 10  | 1 | va3 |
| . . . . . | 1   | 1 | va3 |
| . . . . . | 1   | 1 | va3 |
| . . . . . | 1   | 1 | va3 |
| . . . . . | 1   | 1 | va3 |
| . . . . . | 6   | 1 | va3 |
| . . . . . | 1   | 1 | va3 |
| . . . . . | 29  | 1 | va3 |
| . . . . . | 106 | 0 | va3 |
| . . . . . | 1   | 1 | va3 |
| . . . . . | 1   | 1 | va3 |

cuaccgggucgggaguuagcucaagcgguuuaccuccuacugcggacuuucuaucuguccaucucugucgggguuucgagaccgcggggugcuuacugaccuuuuuug

|                                            |      |   |     |
|--------------------------------------------|------|---|-----|
| .....cgggucgggaguuagcucaagcgguuGa.....     | 1    | 1 | va3 |
| .....cgggucgggaguuagcucaagcgguuAa.....     | 12   | 1 | va3 |
| .....cgggucgggaguuagcucaagcgguuU.....      | 19   | 1 | va3 |
| .....cgggucUgaguuagcucaagcgguu.....        | 1    | 1 | va3 |
| .....cgggGcgggaguuagcucaagcgguu.....       | 1    | 1 | va3 |
| .....Ggggucgggaguuagcucaagcgguu.....       | 2    | 1 | va3 |
| .....cgggucgggaguuagcucaagcgguu.....       | 14   | 0 | va3 |
| .....cgggucgggaguuagcucaagcgguuU.....      | 1    | 1 | va3 |
| .....cgggucgggaguuagcucaagcgguuac.....     | 15   | 0 | va3 |
| .....cgggucgggaguuagcucaagcgguuacc.....    | 8    | 0 | va3 |
| .....Ggggucgggaguuagcucaagcgguuacc.....    | 1    | 1 | va3 |
| .....cgggucgggaguuagcucaagcgguuaccu.....   | 1    | 0 | va3 |
| .....cgggucgggaguuagcucaagcgguuCccu.....   | 1    | 1 | va3 |
| .....cgggucgggaguuagcucaagcgguuaccucc..... | 1    | 0 | va3 |
| .....gggucgggaguuagcucaag.....             | 2    | 0 | va3 |
| .....gggucgggaguuagcucaagc.....            | 12   | 0 | va3 |
| .....gggGcgggaguuagcucaagc.....            | 1    | 1 | va3 |
| .....gggucgggaguuagcucaagcg.....           | 26   | 0 | va3 |
| .....gggucgggaguuagcucaGcgg.....           | 1    | 1 | va3 |
| .....gggucgggaguuagcuAaagcgg.....          | 3    | 1 | va3 |
| .....gggGcgggaguuagcucaagcgg.....          | 3    | 1 | va3 |
| .....gggCcgggaguuagcucaagcgg.....          | 2    | 1 | va3 |
| .....gggucgggaguuagcuAaagcgg.....          | 2    | 1 | va3 |
| .....gggUAggaguuagcucaagcgg.....           | 3    | 1 | va3 |
| .....gggucgggaguuagcucaagcggU.....         | 1    | 1 | va3 |
| .....gggucgggaguuagcuUaagcgg.....          | 1    | 1 | va3 |
| .....gggucgggaguuagcucaagcgg.....          | 328  | 0 | va3 |
| .....gggucgggaguuagcucaagAgg.....          | 3    | 1 | va3 |
| .....gggucggaUuuagcucaagcgg.....           | 2    | 1 | va3 |
| .....gggucggGguuagcucaagcgg.....           | 1    | 1 | va3 |
| .....gggucgggaguuagcucaaaCcg.....          | 1    | 1 | va3 |
| .....gggucgggaguuagcucGagcgg.....          | 1    | 1 | va3 |
| .....gggGcgggaguuagcucaagcgg.....          | 16   | 1 | va3 |
| .....gggucgggaguuagcucaagGggu.....         | 3    | 1 | va3 |
| .....gggucgggaguuagcucaagAggu.....         | 4    | 1 | va3 |
| .....gggucgggaguuagcucUagcgg.....          | 1    | 1 | va3 |
| .....gggucggaUuuagcucaagcgg.....           | 2    | 1 | va3 |
| .....gggucgggagUuagcucaagcgg.....          | 1    | 1 | va3 |
| .....gggucgggaguuagcucaagcggG.....         | 14   | 1 | va3 |
| .....Aggucgggaguuagcucaagcgg.....          | 1    | 1 | va3 |
| .....gggucgggaguuagcucaagUggu.....         | 6    | 1 | va3 |
| .....gggucgggaguuagcucaagcgg.....          | 1199 | 0 | va3 |
| .....gggucgggaguuagcucaagcgUu.....         | 1    | 1 | va3 |
| .....gggucgggaguuagcGcaagcgg.....          | 1    | 1 | va3 |
| .....gggucgggaguuagcucaagcggC.....         | 8    | 1 | va3 |
| .....gggucgggaguuagcuGaaagcgg.....         | 1    | 1 | va3 |
| .....Uggucgggaguuagcucaagcgg.....          | 1    | 1 | va3 |
| .....gggucgggaguuagcCcaagcgg.....          | 1    | 1 | va3 |
| .....gggucgggaguuagGuaagcgg.....           | 1    | 1 | va3 |
| .....gggucAgaguuagcucaagcgg.....           | 1    | 1 | va3 |
| .....gggucgggaguuagcucaagcggA.....         | 4    | 1 | va3 |
| .....gggCcgggaguuagcucaagcgg.....          | 1    | 1 | va3 |
| .....gggUAggaguuagcucaagcgg.....           | 6    | 1 | va3 |
| .....gggucgggaguuUcucaagcgg.....           | 1    | 1 | va3 |
| .....gggUgaguuagcucaagcgg.....             | 1    | 1 | va3 |
| .....gggucgggaguuagUucaagcgg.....          | 1    | 1 | va3 |
| .....gggucgggagUuagcucaagcgg.....          | 2    | 1 | va3 |
| .....gggAcgggaguuagcucaagcgg.....          | 1    | 1 | va3 |
| .....gggucgggaguuagcuAaagcgg.....          | 6    | 1 | va3 |
| .....gggucggGguuagcucaagcgg.....           | 1    | 1 | va3 |
| .....gggucgggaguuuAcucaagcgg.....          | 1    | 1 | va3 |
| .....gggucgggaguuagcuUaagcgg.....          | 4    | 1 | va3 |
| .....gggucgggagCuagcucaagcgg.....          | 1    | 1 | va3 |
| .....gggucgggaguuagcucaaUcgg.....          | 1    | 1 | va3 |
| .....gggucgggaguuagcucaCgagcgg.....        | 2    | 1 | va3 |
| .....gggucgggaguuagcuAaagcgg.....          | 11   | 1 | va3 |
| .....gggCcgggaguuagcucaagcgguu.....        | 1    | 1 | va3 |
| .....gggucgggaguuagGuaagcgg.....           | 1    | 1 | va3 |
| .....gggucgggaguuagLucaagcgg.....          | 5    | 1 | va3 |

cuaccgggucggaguuagcucaagcgguuuaccuccuacugcggacuucuaucuguccaucucugucggguucgagaccgcgggucuuacugaccuuuuuug

|                                         |     |   |     |
|-----------------------------------------|-----|---|-----|
| .....gggucggaguuagcucaagAgguu.....      | 1   | 1 | va3 |
| .....gggucggaguuagcuAaagcgguu.....      | 2   | 1 | va3 |
| .....gggucggaguuagcucaagcggGu.....      | 4   | 1 | va3 |
| .....ggguAaggaguuagcucaagcgguu.....     | 1   | 1 | va3 |
| .....gggucggaguuagcGcaagcgguu.....      | 1   | 1 | va3 |
| .....gggucggaguuagcucaagcggCu.....      | 2   | 1 | va3 |
| .....gggucggaguuagcucaagUgguu.....      | 1   | 1 | va3 |
| .....gggucggaguuagcAcaagcgguu.....      | 1   | 1 | va3 |
| .....gggucggagGuaagcucaagcgguu.....     | 2   | 1 | va3 |
| .....gggucggaguuagcucaagcgguC.....      | 1   | 1 | va3 |
| .....gggucggaguuagcucaagcgguu.....      | 523 | 0 | va3 |
| .....gggucggUguuagcucaagcgguu.....      | 1   | 1 | va3 |
| .....gggucggaguuagcucaUgcgguu.....      | 1   | 1 | va3 |
| .....gggucggaguuagcucaagcgguaA.....     | 14  | 1 | va3 |
| .....gggGcggaguuagcucaagcgguu.....      | 8   | 1 | va3 |
| .....gggucggAuuagcucaagcgguu.....       | 1   | 1 | va3 |
| .....ggguUggaguuagcucaagcgguu.....      | 1   | 1 | va3 |
| .....ggguGggaguuagcucaagcgguu.....      | 1   | 1 | va3 |
| .....gggucggAuuagcucaagcgguu.....       | 1   | 1 | va3 |
| .....gggucAagaguuagcucaagcgguu.....     | 1   | 1 | va3 |
| .....gggucggGguuagcucaagcgguu.....      | 1   | 1 | va3 |
| .....gggucggaguuagcucaagcggGu.....      | 1   | 1 | va3 |
| .....gggucggaguuagcucaagcgguuC.....     | 2   | 1 | va3 |
| .....gggucggaguuagcucaagGgguu.....      | 1   | 1 | va3 |
| .....gggucggaguuagcucaagcgguu.....      | 77  | 0 | va3 |
| .....gggucggaguuagcucaagcgguaA.....     | 15  | 1 | va3 |
| .....gggucggaguuagcuGaaagcgguu.....     | 1   | 1 | va3 |
| .....gggucggaguuagcucaagcgguuU.....     | 4   | 1 | va3 |
| .....gggucggaguuagcGcaagcgguuac.....    | 1   | 1 | va3 |
| .....gggucggaguuagcCcaagcgguuac.....    | 1   | 1 | va3 |
| .....gUgucggaguuagcucaagcgguuac.....    | 1   | 1 | va3 |
| .....gggucggaguuagcucaaCcgguuac.....    | 1   | 1 | va3 |
| .....gggucggaguuagcucaagcgguuac.....    | 147 | 0 | va3 |
| .....gggGcggaguuagcucaagcgguuac.....    | 2   | 1 | va3 |
| .....ggUcggaguuagcucaagcgguuac.....     | 1   | 1 | va3 |
| .....gggucggaguuagcucaagcgguuA.....     | 4   | 1 | va3 |
| .....gggucggaguuagcucaagcgguuAG.....    | 1   | 1 | va3 |
| .....gggucggaguuagcAcaagcgguuac.....    | 1   | 1 | va3 |
| .....gggucggaguuagcuAaagcgguuac.....    | 1   | 1 | va3 |
| .....gggucggaguuagcucaaAcgguuacc.....   | 1   | 1 | va3 |
| .....Uggucggaguuagcucaagcgguuacc.....   | 1   | 1 | va3 |
| .....gggucggaguuagcucaagcgguuacc.....   | 63  | 0 | va3 |
| .....gggucggaguuagcucCagcgguuacc.....   | 1   | 1 | va3 |
| .....gggucggaguuagcucaagcgguuacA.....   | 1   | 1 | va3 |
| .....gggucggaguuagcucaagcgguuUc.....    | 2   | 1 | va3 |
| .....ggguAaggaguuagcucaagcgguuacc.....  | 1   | 1 | va3 |
| .....gggucggaguuagcucaagcgguuCcc.....   | 1   | 1 | va3 |
| .....ggguAaggaguuagcucaagcgguuaccu..... | 1   | 1 | va3 |
| .....gggucggaguuagcucaagcgguuaccA.....  | 2   | 1 | va3 |
| .....gggucggaguuagcucaagcgguuAUc.....   | 1   | 1 | va3 |
| .....gggGcggaguuagcucaagcgguuaccu.....  | 1   | 1 | va3 |
| .....gggucggaguuagcucaagcgguuaccu.....  | 48  | 0 | va3 |
| .....gUgucggaguuagcucaagcgguuaccu.....  | 1   | 1 | va3 |
| .....gggucggaguuagcucaagcgguuaccuc..... | 11  | 0 | va3 |
| .....Cgucggaguuagcucaagcgguu.....       | 1   | 1 | va3 |
| .....ggucggaguuagcucaagcgguuua.....     | 1   | 0 | va3 |
| .....ggucggaguuagcucaagcgguuaccu.....   | 1   | 0 | va3 |
| .....cggaguuagcucaagcgguuua.....        | 2   | 0 | va3 |
| .....cggaguuagcucaagcgguuac.....        | 1   | 0 | va3 |
| .....ggaguuagcucaagcgguu.....           | 1   | 0 | va3 |
| .....gcucaagcgguuaccuccuagccggac.....   | 1   | 0 | va3 |
| .....cucaagcgguuaccuccuagcc.....        | 1   | 0 | va3 |
| .....caagcgguuaccuccuagccgg.....        | 1   | 0 | va3 |
| .....aagcgguuaccuccuagccgg.....         | 1   | 0 | va3 |
| .....aagcgguuaccuccuagccggacuuu.....    | 2   | 0 | va3 |
| .....agcgguuaccuccuagccgg.....          | 1   | 0 | va3 |
| .....agcgguuaccuccuagccggac.....        | 1   | 0 | va3 |
| .....agcgguuaccuccuagccggacuu.....      | 1   | 0 | va3 |
| .....gcccguuaccuccuagccgg.....          | 1   | 0 | va3 |

cuaccgggucggaguagcucaagcgguuaccuccucaugccggacuucuaucuguccaucugugcggguucgagaccgcgggugcuuacugaccuuuaug

|                                         |    |   |     |
|-----------------------------------------|----|---|-----|
| .....gcgguuaccuccucaugccggacu.....      | 1  | 0 | va3 |
| .....cgguuaccuccucaugccggacuuc.....     | 1  | 0 | va3 |
| .....gguuaccuccucaugccggacuuu.....      | 2  | 0 | va3 |
| .....guuaccuccucaugccggacuuu.....       | 1  | 0 | va3 |
| .....uuaccuccucaugccggacuuu.....        | 1  | 0 | va3 |
| .....uaccuccucaugccggacuuu.....         | 1  | 0 | va3 |
| .....uaccuccucaugccggacuuucG.....       | 1  | 1 | va3 |
| .....uaccuccucaugccggacuuucu.....       | 1  | 0 | va3 |
| .....uaccuccucaugccggacuuucua.....      | 1  | 0 | va3 |
| .....accuccucaugccggacu.....            | 1  | 0 | va3 |
| .....accuccucaugccggacu.....            | 1  | 0 | va3 |
| .....accuccucaugccggacuuu.....          | 3  | 0 | va3 |
| .....accuccucaugccggacuuuc.....         | 1  | 0 | va3 |
| .....accuccucaugccggacuuucu.....        | 2  | 0 | va3 |
| .....accuccucaugccggacuuucuauc.....     | 1  | 0 | va3 |
| .....Acuccucaugccggacuuu.....           | 1  | 1 | va3 |
| .....uccucaugccggacuuucu.....           | 1  | 0 | va3 |
| .....ccucaugccggacuuucua.....           | 1  | 0 | va3 |
| .....ccucaugccggacuuucuauc.....         | 1  | 0 | va3 |
| .....uccaugccggacuuucuauc.....          | 1  | 0 | va3 |
| .....cuuucuaucuguccaucu.....            | 1  | 0 | va3 |
| .....uuucuaucuguccaucucugucug.....      | 1  | 0 | va3 |
| .....uacuguccaucucugucugg.....          | 1  | 0 | va3 |
| .....uccaucucugucuggguucgagaccg.....    | 1  | 0 | va3 |
| .....uccaucucugucuggguucgagaccg.....    | 2  | 0 | va3 |
| .....ccaucucugucuggguucgagacc.....      | 2  | 0 | va3 |
| .....ccaucucugucuggguucgagaccg.....     | 6  | 0 | va3 |
| .....ccaucucugucuggguucgagaccg.....     | 1  | 0 | va3 |
| .....caucucugucuggguucgag.....          | 1  | 0 | va3 |
| .....caucucugucuggguucgagacc.....       | 1  | 0 | va3 |
| .....aucucugucuggguucgagacc.....        | 1  | 0 | va3 |
| .....cugucuggguucgagacc.....            | 1  | 0 | va3 |
| .....gguucgagaccgcgggugc.....           | 1  | 0 | va3 |
| .....gguucgagaccgcgggugcuuacuga.....    | 1  | 0 | va3 |
| .....gguucgagaccgclggugcuuacuga.....    | 1  | 1 | va3 |
| .....guucgagaccgcgggugcuuacug.....      | 1  | 0 | va3 |
| .....guucgagaccgcgggugcuuacugac.....    | 1  | 0 | va3 |
| .....guucgagaccgcgggugcuuacugacc.....   | 1  | 0 | va3 |
| .....guucgagaccgcgggugcuuacugaccuu..... | 1  | 0 | va3 |
| .....uucgagaccgcgggugcuuacugaccuu.....  | 1  | 0 | va3 |
| .....ucgagaccgcgggugcuuacugaccuu.....   | 1  | 0 | va3 |
| .....cgagaccgcgggugcuuacugaccuuu.....   | 2  | 0 | va3 |
| .....gagaccgcgggugcuuacugaccuuuu.....   | 1  | 1 | va3 |
| .....gagaccgcgggugcuuacugaccuuuuU.....  | 1  | 1 | va3 |
| .....agaccgcgggugcuuacugaccuuuu.....    | 1  | 0 | va3 |
| .....aUaccgcgggugcuuacugaccuuuu.....    | 1  | 1 | va3 |
| .....agaccgcgggGgcuuacugaccuuuu.....    | 1  | 1 | va3 |
| .....agaccgcgggugcuuacugaccuuuu.....    | 3  | 0 | va3 |
| .....gaaccgcgggugcuuacugac.....         | 1  | 0 | va3 |
| .....gaccgcgggugcuuacugaccuuuu.....     | 1  | 0 | va3 |
| .....gaccgcgggugcuuacugaccuuuu.....     | 1  | 1 | va3 |
| .....gaccgcgggugcuuacugaccuuuu.....     | 14 | 0 | va3 |
| .....Uaccgcgggugcuuacugaccuuuu.....     | 1  | 1 | va3 |
| .....gaccgcgggugcuuacugaccuuuuU.....    | 8  | 1 | va3 |
| .....accgcgCgugcuuacugacc.....          | 1  | 1 | va3 |
| .....accgcgggugcuuacugacc.....          | 1  | 0 | va3 |
| .....accgcgggugcuuacugaccuuuu.....      | 6  | 0 | va3 |
| .....accgcgggugcuuacugaUccuuuu.....     | 1  | 1 | va3 |
| .....accgcgggugcuuacugaccuuuuU.....     | 1  | 1 | va3 |
| .....ccgcgggugcuuacugaccuuuuUu.....     | 1  | 1 | va3 |
| .....cgcgggugcuuacugaccuu.....          | 1  | 0 | va3 |
| .....cgcgggugAuuacugaccuuuu.....        | 1  | 1 | va3 |
| .....cgcgggugcuuacugaccuuCu.....        | 1  | 1 | va3 |
| .....cgcgggugcuuacugaccuuuu.....        | 18 | 0 | va3 |
| .....cgcgggugcuuacugaccuuuu.....        | 4  | 0 | va3 |
| .....cgcgggugcuuacugaccuuuuA.....       | 2  | 1 | va3 |

cuaccgggucggaguuagcucaagcgguuaccuccuacugcgggacuuucuaucuguccaucucugucgggguuucgagaccgcggggugcuuacugaccuuuuuug

|                                |   |   |     |
|--------------------------------|---|---|-----|
| .....cgcgggugcuuacugaccuuGua.. | 1 | 1 | va3 |
| .....cgcgggugcuuacugaccuuuuU.. | 3 | 1 | va3 |
| .....cgcgggugcuuacugaccuuuuUu. | 3 | 1 | va3 |
| .....gcgggugcuuacugaccuuuu...  | 9 | 0 | va3 |
| .....gAgggugcuuacugaccuuuu...  | 1 | 1 | va3 |
| .....gcgggugcuuacugaccuuuuU..  | 5 | 1 | va3 |
| .....cgggugcuuacugaccuuuu...   | 2 | 0 | va3 |
| .....cgggugcuuacugUccuuuu...   | 1 | 1 | va3 |
| .....cgggugcuuacugaccuuuuua..  | 1 | 0 | va3 |
| .....gggugcuuacugaccuuuuUu.    | 1 | 1 | va3 |
| .....ggugcuuacugaccuuuuU..     | 1 | 1 | va3 |
| .....gugcuuacugaccuuuu...      | 3 | 0 | va3 |
| .....gugcuuacugaccuuuuU..      | 1 | 1 | va3 |

|                                     |    |   |     |
|-------------------------------------|----|---|-----|
| ..accgggucggaguuagc.....            | 1  | 0 | SW4 |
| ..accgggucggaguuagcucaa.....        | 1  | 0 | SW4 |
| ...ccgggucggaguuagcucaagc.....      | 1  | 0 | SW4 |
| ...ccgggucggaguuagcucaagcgg.....    | 1  | 0 | SW4 |
| ...cgggucggaguuagcucaag.....        | 2  | 0 | SW4 |
| ...cUggucggaguuagcucaagc.....       | 1  | 1 | SW4 |
| ...cgggucggaguuagcucaagcgg.....     | 8  | 0 | SW4 |
| ...cgggucggaguuagcucaCgcgg.....     | 1  | 1 | SW4 |
| ...cgggucggaguuagcucaagcggA.....    | 2  | 1 | SW4 |
| ...cgggucggaguuagcucaagcgg.....     | 13 | 0 | SW4 |
| ...cgggucggaguuagcucaagcgggu.....   | 24 | 0 | SW4 |
| ...cgggAcggaguuagcucaagcgggu.....   | 1  | 1 | SW4 |
| ...cgggucggaguuagcucaagcgggu.....   | 1  | 1 | SW4 |
| ...cgggucggaguuagcucaagcggguA.....  | 1  | 1 | SW4 |
| ...cgggucggaguuagcucaagcggguC.....  | 1  | 1 | SW4 |
| ...cgggucggaguuagcucaagcggguu.....  | 10 | 0 | SW4 |
| ...cgggucggaguuagcucaagcggguuG..... | 1  | 1 | SW4 |
| ...cgggucggaguuagcucaagcggguuU..... | 6  | 1 | SW4 |
| ...gggucggaguuagcucaagc.....        | 1  | 0 | SW4 |
| ...gggucggaguuagcucaagcgg.....      | 1  | 0 | SW4 |
| ...gggucggaguuagcucaagcgggu.....    | 2  | 0 | SW4 |
| .....gUgguuagcagaccgcgggugc.....    | 1  | 1 | SW4 |
| .....uucgagaccgcgggugcuuacu.....    | 1  | 0 | SW4 |
| .....ucgagaccgcgggugcuuacugacc..... | 1  | 0 | SW4 |
| .....gagaccgcgggugcuuacugac.....    | 1  | 0 | SW4 |
| .....cccgggugcuuacugac.....         | 1  | 0 | SW4 |
| .....cgcgggugcuuacugaccuu.....      | 2  | 0 | SW4 |
| .....cgcgggugcuuacugCccuuu.....     | 1  | 1 | SW4 |
| .....cgcgggugcuuacugaccuuA.....     | 1  | 1 | SW4 |
| .....cgcgggugcuuacugaccuuu.....     | 15 | 0 | SW4 |

|                                     |    |   |     |
|-------------------------------------|----|---|-----|
| ..accgggucggaguuagcucaagc.....      | 1  | 0 | ya4 |
| ..acUcgggucggaguuagcucaagcgg.....   | 1  | 1 | ya4 |
| ..accgggucggaguuagcucaagcgggu.....  | 2  | 0 | ya4 |
| ..accgggucggaguuagcucaagcggguu..... | 1  | 0 | ya4 |
| ...ccgggucggaguuagcucaag.....       | 1  | 0 | ya4 |
| ...Acgggucggaguuagcucaag.....       | 1  | 1 | ya4 |
| ...cgggucggaguuagcucaagcgg.....     | 8  | 0 | ya4 |
| ...Ucgggucggaguuagcucaagcgg.....    | 2  | 1 | ya4 |
| ...cgggucggaguuagcucaag.....        | 1  | 0 | ya4 |
| ...cgggucggaguuagcucaagc.....       | 15 | 0 | ya4 |
| ...Ugggucggaguuagcucaagc.....       | 2  | 1 | ya4 |
| ...cgggucAgaguuagcucaagc.....       | 1  | 1 | ya4 |
| ...cgggucggaguuagcucaagA.....       | 1  | 1 | ya4 |
| ...cgggucggaguuagUcaagcgg.....      | 1  | 1 | ya4 |
| ...cgggucggaguuagCagcucaagcgg.....  | 1  | 1 | ya4 |
| ...cgggucggaguuagcucaagcgg.....     | 10 | 0 | ya4 |
| ...cgggucggaguuagcucaagcU.....      | 1  | 1 | ya4 |
| ...cgggucgUaguuagcucaagcgg.....     | 3  | 1 | ya4 |
| ...cUggucggaguuagcucaagcgg.....     | 1  | 1 | ya4 |
| ...cgggucggaguuagcGcaagcgg.....     | 1  | 1 | ya4 |
| ...cgggucggaguuagcucaaUcgg.....     | 2  | 1 | ya4 |
| ...cgggGcggaguuagcucaagcgg.....     | 1  | 1 | ya4 |
| ...cgggucggaguuagUcaagcgg.....      | 1  | 1 | ya4 |
| ...cgggucggaguuagUcaagcgg.....      | 1  | 1 | ya4 |



cuaccgggucgggaguuagcucaagcgguuaccuccuacugcgggacuuucuaucuguccaucucugucgggguuucgagaccgcgggugcuuacugaccuuuuuug

|                                         |     |   |     |
|-----------------------------------------|-----|---|-----|
| .....cgggucgggaguuagcucaagcga.....      | 2   | 1 | ya4 |
| .....cgggucgggaguuagcucaagcgg.....      | 321 | 0 | ya4 |
| .....cgggucgggaguuagcucUagcgg.....      | 1   | 1 | ya4 |
| .....cgggucgggaguuagcucaaCcg.....       | 1   | 1 | ya4 |
| .....cgggucgggaguuagcuGaaagcgg.....     | 1   | 1 | ya4 |
| .....Ggggucgggaguuagcucaagcgg.....      | 1   | 1 | ya4 |
| .....cgggucgggaguuagcCcaagcgg.....      | 2   | 1 | ya4 |
| .....cgggucCgaguuagcucaagcgg.....       | 1   | 1 | ya4 |
| .....cgggucgggaguuagcucaagcgg.....      | 133 | 0 | ya4 |
| .....cgggucgggaguuUcuaagcgg.....        | 1   | 1 | ya4 |
| .....cgggucggaUuuagcucaagcgg.....       | 1   | 1 | ya4 |
| .....cgAgucgggaguuagcucaagcgg.....      | 1   | 1 | ya4 |
| .....cgggucgggaguuagcucaagcggA.....     | 3   | 1 | ya4 |
| .....cgggucUgaguuagcucaagcgg.....       | 1   | 1 | ya4 |
| .....cgggucgggaguuagcucaagUgg.....      | 1   | 1 | ya4 |
| .....cgggucgggaguuagcucaagcgguu.....    | 8   | 0 | ya4 |
| .....cgggucgggaguuagcucaagcggua.....    | 2   | 1 | ya4 |
| .....cgggucgggaguuagcucaagcgguuU.....   | 1   | 1 | ya4 |
| .....cgggucgggaguuagcucaagcgguuacc..... | 1   | 0 | ya4 |
| .....gggucgggaguuagcucaag.....          | 3   | 0 | ya4 |
| .....gggucggGuuagcucaagc.....           | 1   | 1 | ya4 |
| .....gggucgggaguuagcucaagc.....         | 5   | 0 | ya4 |
| .....gggucgggaguuagcucaagc.....         | 3   | 0 | ya4 |
| .....gggucggGuuagcucaagc.....           | 1   | 1 | ya4 |
| .....gggucgggaguuagcucCagcgg.....       | 1   | 1 | ya4 |
| .....gCgucgggaguuagcucaagcgg.....       | 1   | 1 | ya4 |
| .....gggucgggaguuagcucaagcgg.....       | 47  | 0 | ya4 |
| .....gggucgggaguuagcucaagcGU.....       | 2   | 1 | ya4 |
| .....gggGcgggaguuagcucaagcgg.....       | 2   | 1 | ya4 |
| .....gggucggGuuagcucaagcgg.....         | 1   | 1 | ya4 |
| .....gggucgggaguuagcucaagcgg.....       | 120 | 0 | ya4 |
| .....ggUcgggaguuagcucaagcgg.....        | 1   | 1 | ya4 |
| .....gggucgggaguuGcuaagcgg.....         | 1   | 1 | ya4 |
| .....gggucgggaguuagAucaagcgguu.....     | 1   | 1 | ya4 |
| .....gggucgggaguuagcucaaUcgguu.....     | 1   | 1 | ya4 |
| .....gggGcgggaguuagcucaagcgguu.....     | 2   | 1 | ya4 |
| .....gggucggUuuagcucaagcgguu.....       | 2   | 1 | ya4 |
| .....gggucgggaguuagcucaagUgguu.....     | 1   | 1 | ya4 |
| .....gggucgggaguuagcucaagcgguu.....     | 223 | 0 | ya4 |
| .....gggucgggaguuagcucaagcgguG.....     | 1   | 1 | ya4 |
| .....Cggucgggaguuagcucaagcgguu.....     | 1   | 1 | ya4 |
| .....gggucgggaguuagcucaagcggCu.....     | 1   | 1 | ya4 |
| .....gggucgggaguuagcucaagcggGu.....     | 6   | 1 | ya4 |
| .....gggucgggaguuagcucaagcggAu.....     | 1   | 1 | ya4 |
| .....gggucgggaguuagcucaagcgguuU.....    | 2   | 1 | ya4 |
| .....gggucgggaguuagcucaagcgguuu.....    | 2   | 0 | ya4 |
| .....ggucgggaguuagcucaagcgg.....        | 1   | 0 | ya4 |
| .....gucgggaguuagcucaagcgguu.....       | 1   | 0 | ya4 |
| .....cgaguuagcucaagcgguuaccuc.....      | 1   | 0 | ya4 |
| .....cgaguuagcucaagcgguuaccucc.....     | 1   | 0 | ya4 |
| .....ggaguuagcucaagcgg.....             | 1   | 0 | ya4 |
| .....ggaguuagcucaagcgguu.....           | 3   | 0 | ya4 |
| .....ggaguuagcucaagcgguuu.....          | 1   | 0 | ya4 |
| .....gcgguuaccuccuacugcc.....           | 1   | 0 | ya4 |
| .....uaccuccuacugcggacuuc.....          | 1   | 0 | ya4 |
| .....cucugucgugguuucgagac.....          | 2   | 0 | ya4 |
| .....cugugcugguuUgaga.....              | 1   | 1 | ya4 |
| .....gagaccgcggugcuuU.....              | 1   | 1 | ya4 |
| .....accgcggugcuuacugac.....            | 1   | 0 | ya4 |
| .....cgcgggugcuuacugacc.....            | 1   | 0 | ya4 |
| .....cgcgggugcuuacugacc.....            | 2   | 0 | ya4 |
| .....cgcgggugcuuacugaccuu.....          | 1   | 0 | ya4 |
| .....cgcgggugcuuacugaccuuu.....         | 14  | 0 | ya4 |
| .....cgcgggugcuuacugaccuuuA.....        | 1   | 1 | ya4 |
| .....gcgggugcuuacugaccuuu.....          | 1   | 0 | ya4 |
| ..accgggucgggaguuagcucaagcgg.....       | 1   | 0 | ku1 |
| ..Accgggucgggaguuagcucaagc.....         | 1   | 1 | ku1 |
| ..cccgggucgggaguuagcucaagc.....         | 1   | 0 | ku1 |

cuaccgggucgggaguuagcucaagcgguuuaccuccuacugcgggacuuucuaucuguccaucucugugcgggguuucgagaccgcgggugcuuacugaccuuuuuag

|                                       |     |   |     |
|---------------------------------------|-----|---|-----|
| ...ccgggucgggaguuagcucaagcgggu.....   | 1   | 0 | ku1 |
| ...ccgggucgggaguuagcucaagcgggu.....   | 1   | 0 | ku1 |
| ...cgggucgggaguuagcucaagc.....        | 1   | 0 | ku1 |
| ...cgggucgggaguuagcucaagcg.....       | 6   | 0 | ku1 |
| ...cgggucgggaguuagcucCagcgg.....      | 1   | 1 | ku1 |
| ...cgggucgggaguuagcucaagcgg.....      | 11  | 0 | ku1 |
| ...cgggucgggaguuagcucaagcggA.....     | 2   | 1 | ku1 |
| ...cgggucgggaguuagcucaagcgggu.....    | 14  | 0 | ku1 |
| ...cgggucgggaguuagcucaagcggC.....     | 1   | 1 | ku1 |
| ...cgggucgggaguuagcucaagcgguu.....    | 3   | 0 | ku1 |
| ...cgggucgggaguuagcucaagcgguaa.....   | 1   | 0 | ku1 |
| ...cgggucgggaguuagcucaagcgguaA.....   | 2   | 1 | ku1 |
| ...cgggucgggaguuagcucaag.....         | 1   | 0 | ku1 |
| ...cgggucgggaguuagcucaagc.....        | 1   | 0 | ku1 |
| ...cgggucgggaguuagcucaagcA.....       | 1   | 1 | ku1 |
| ...cgggucgggaguuagcucaagcg.....       | 13  | 0 | ku1 |
| ...cgggucgggaguuagcucUagcgg.....      | 1   | 1 | ku1 |
| ...cgggucgggaguuagcucGagcucagcgg..... | 1   | 1 | ku1 |
| ...cgggucgUaguuagcucaagcgg.....       | 1   | 1 | ku1 |
| ...cgggucgggaguuagAuaagcgg.....       | 1   | 1 | ku1 |
| ...cgggucgggaguuagcucaagcggC.....     | 3   | 1 | ku1 |
| ...cgggucgggaguuagcucaagcgg.....      | 2   | 1 | ku1 |
| ...cgggucgggaguuagcucaagcgg.....      | 1   | 1 | ku1 |
| ...Ugggucgggaguuagcucaagcgg.....      | 1   | 1 | ku1 |
| ...Ggggucgggaguuagcucaagcgg.....      | 1   | 1 | ku1 |
| ...cgggucgggaguuagcucaagcgg.....      | 1   | 1 | ku1 |
| ...cgggucgggaguuagcucaagcgg.....      | 285 | 0 | ku1 |
| ...cgggucCgaguuagcucaagcgg.....       | 1   | 1 | ku1 |
| ...cgggucgggaguuagcCaaagcgg.....      | 1   | 1 | ku1 |
| ...cgggucgggaguuagcucaUgcgg.....      | 1   | 1 | ku1 |
| ...cgggucgggCguuagcucaagcgg.....      | 1   | 1 | ku1 |
| ...cgggucgCaguagcucaagcgg.....        | 1   | 1 | ku1 |
| ...cgggGcggaguuagcucaagcgg.....       | 1   | 1 | ku1 |
| ...cgggucgggaguuagcucaagcggU.....     | 1   | 1 | ku1 |
| ...cgggucgggaguuagcuAaagcgg.....      | 1   | 1 | ku1 |
| ...cgggucgggaguuagcucaagcA.....       | 2   | 1 | ku1 |
| ...cgggucgggaguuagcucaaaUcgg.....     | 2   | 1 | ku1 |
| ...cgggucgggaguuagcuAaagcgg.....      | 2   | 1 | ku1 |
| ...cgggucgggaguuagcucaagcggC.....     | 16  | 1 | ku1 |
| ...cgggCcggaguuagcucaagcgg.....       | 3   | 1 | ku1 |
| ...cgggucgggaguuagcucaagcgg.....      | 1   | 1 | ku1 |
| ...cgggucgggaguuagcucaagcgg.....      | 3   | 1 | ku1 |
| ...cgggucgggaguuagcucaagcgg.....      | 3   | 1 | ku1 |
| ...cgggucgUaguuagcucaagcgg.....       | 1   | 1 | ku1 |
| ...cgggucgggaguuagcucaagcggG.....     | 2   | 1 | ku1 |
| ...cgggucgggaguuagAuaagcgg.....       | 1   | 1 | ku1 |
| ...cgggucgggaguuagcucaagcgg.....      | 526 | 0 | ku1 |
| ...cgggucgggagCuagcucaagcgg.....      | 2   | 1 | ku1 |
| ...cgggucgCaguagcucaagcgg.....        | 3   | 1 | ku1 |
| ...cgggucgggUguuagcucaagcgg.....      | 1   | 1 | ku1 |
| ...cggguAaggaguuagcucaagcgg.....      | 1   | 1 | ku1 |
| ...cgggGcggaguuagcucaagcgg.....       | 11  | 1 | ku1 |
| ...cgggucgggaguuagcucCagcgg.....      | 4   | 1 | ku1 |
| ...cgggucgggaguuagcAaagcgg.....       | 1   | 1 | ku1 |
| ...cgggucgggaguuagcucaagcggA.....     | 10  | 1 | ku1 |
| ...cgggucgggaguuagcucaagcgguaA.....   | 45  | 1 | ku1 |
| ...cgggucgggaguuagcucaagcgguu.....    | 1   | 1 | ku1 |
| ...cgggucgggaguuagcucaagcgguG.....    | 2   | 1 | ku1 |
| ...cgggucgggaguuagcucaagcgguu.....    | 111 | 0 | ku1 |
| ...cgggucgggaguuagcucaagcggG.....     | 1   | 1 | ku1 |
| ...cgggCcggaguuagcucaagcgguu.....     | 1   | 1 | ku1 |
| ...cgggGcggaguuagcucaagcgguu.....     | 1   | 1 | ku1 |
| ...cgggucgggaguuagcucaagcggA.....     | 1   | 1 | ku1 |
| ...cgggucgggaguuagcucaagcgguuU.....   | 45  | 1 | ku1 |
| ...cgggucgggaguuagcucaagcgguaA.....   | 18  | 1 | ku1 |
| ...cgggucgggaguuagcucaagcgguuu.....   | 7   | 0 | ku1 |
| ...cgggucgggaguuagcucaagcgguuu.....   | 1   | 1 | ku1 |
| ...cgggucgggaguuagcucaagcgguuac.....  | 1   | 0 | ku1 |
| ...gggucgggaguuagcucGagcgg.....       | 1   | 1 | ku1 |

cuaccgggucggaguuagcucaagcgguuaccuccuacugcggacuuucuaucuguccaucucugucgggguuucgagaccgcgggugcuuacugaccuuuuuag

|                                      |     |   |     |
|--------------------------------------|-----|---|-----|
| .....gggGcggaguuagcucaagcgg.....     | 1   | 1 | ku1 |
| .....gggucggaguuagcucaagcgg.....     | 43  | 0 | ku1 |
| .....gggucggaguuagcucaagcgg.....     | 1   | 1 | ku1 |
| .....gggucggaguuagcucaagcgg.....     | 169 | 0 | ku1 |
| .....gggucggaguuagcucaCgcgg.....     | 1   | 1 | ku1 |
| .....gCgucggaguuagcucaagcgg.....     | 1   | 1 | ku1 |
| .....gggucAgaguuagcucaagcgg.....     | 1   | 1 | ku1 |
| .....gggGcggaguuagcucaagcgg.....     | 3   | 1 | ku1 |
| .....gggucCgaguuagcucaagcgg.....     | 1   | 1 | ku1 |
| .....gggucggaguuagcucaagcggG.....    | 6   | 1 | ku1 |
| .....gggucggaguuagcucaagcggC.....    | 5   | 1 | ku1 |
| .....gggucggaguuagcucaagcgg.....     | 1   | 1 | ku1 |
| .....gggucggaguuagcucaagcggA.....    | 13  | 1 | ku1 |
| .....gggGcggaguuagcucaagcgguu.....   | 1   | 1 | ku1 |
| .....gggucggaguuagcucaagcggA.....    | 41  | 1 | ku1 |
| .....gggucggaguuagcucaagcggA.....    | 1   | 1 | ku1 |
| .....gggucggaguuagcucaagcgguu.....   | 23  | 0 | ku1 |
| .....gggucggaguuagcucaagcggG.....    | 2   | 1 | ku1 |
| .....gggucggaguuagcucaagcggA.....    | 12  | 1 | ku1 |
| .....gggucggaguuagcucaagcgguuU.....  | 11  | 1 | ku1 |
| .....gggucggaguuagcucaagcgguu.....   | 6   | 0 | ku1 |
| .....gggucggaguuagcucaagcgguuac..... | 2   | 0 | ku1 |
| .....gggucggaguuagcucaagcgguuA.....  | 1   | 1 | ku1 |
| .....ggaguuagcucaagcgguuU.....       | 1   | 1 | ku1 |
| .....cgcgggugcuuacugaccuu.....       | 2   | 0 | ku1 |
| .....cgcgggugcuuacGgaccuu.....       | 1   | 1 | ku1 |
| .....cgCggugcuuacugaccuu.....        | 1   | 1 | ku1 |
| .....cgcgggugcuuacugaccuuA.....      | 4   | 1 | ku1 |
| .....cgcgggugcuuacugaccuu.....       | 43  | 0 | ku1 |
| .....cgcgggugcuuacugaccuuu.....      | 9   | 0 | ku1 |
| .....cgcgggugcuuacugaccuuuA.....     | 1   | 1 | ku1 |
| .....cgcgggugcuuacugaccuuuu.....     | 1   | 0 | ku1 |
| .....accgggucggaguuagcu.....         | 1   | 0 | j23 |
| .....accgggGcggaguuagcucaagcgg.....  | 1   | 1 | j23 |
| .....accgggucggaguuagcucaagcgg.....  | 1   | 0 | j23 |
| .....accgggucggaguuagcGcaagcgg.....  | 1   | 1 | j23 |
| .....accgggucggaguuagcuGaaagcgg..... | 1   | 1 | j23 |
| .....accgggucggaguuagcucaagcggA..... | 1   | 1 | j23 |
| .....cccgggucggaguuagcucaagc.....    | 1   | 0 | j23 |
| .....cccUggucggaguuagcucaagc.....    | 1   | 1 | j23 |
| .....cccgggucggaguuagcucaagcgg.....  | 3   | 0 | j23 |
| .....cccgggucggaguuagcucaagcgg.....  | 5   | 0 | j23 |
| .....Acgggucggaguuagcucaagcgg.....   | 4   | 1 | j23 |
| .....cgggucggGuuagcucaag.....        | 1   | 1 | j23 |
| .....cgggucggaguuagcucaag.....       | 2   | 0 | j23 |
| .....cgggucggaguuagcucaagc.....      | 2   | 0 | j23 |
| .....cgggucggaguuagcucaagc.....      | 7   | 0 | j23 |
| .....cgggucggaguuagcucaagcGU.....    | 1   | 1 | j23 |
| .....cgggucAggaguuagcucaagcgg.....   | 1   | 1 | j23 |
| .....cgggucggaguuagcucaagcgg.....    | 102 | 0 | j23 |
| .....cgggucggaguuagcucaagcgg.....    | 1   | 1 | j23 |
| .....cgggGcggaguuagcucaagcgg.....    | 3   | 1 | j23 |
| .....cgggucggaguuUcucaagcgg.....     | 1   | 1 | j23 |
| .....cgggucggaguuagcAcaagcgg.....    | 1   | 1 | j23 |
| .....cgggucggCguuagcucaagcgg.....    | 1   | 1 | j23 |
| .....cAgggucggaguuagcucaagcgg.....   | 1   | 1 | j23 |
| .....Ucgggucggaguuagcucaagcgg.....   | 2   | 1 | j23 |
| .....cgggucggaguuagcucaagcG.....     | 1   | 1 | j23 |
| .....cggGucggaguuagcucaagcgg.....    | 1   | 1 | j23 |
| .....cgggucggGuuagcucaagcgg.....     | 1   | 1 | j23 |
| .....cgggucggaguuagcucaagAgg.....    | 1   | 1 | j23 |
| .....cgggucggaguuagcucaagcgg.....    | 135 | 0 | j23 |
| .....cgggucggagCuagcucaagcgg.....    | 1   | 1 | j23 |
| .....ccggGcggaguuagcucaagcgg.....    | 1   | 1 | j23 |
| .....cgggucggaUuuagcucaagcgg.....    | 1   | 1 | j23 |
| .....cgggucggaguuagcucaagcG.....     | 2   | 1 | j23 |
| .....cgggucggaguuagcGcaagcgg.....    | 1   | 1 | j23 |
| .....cgggucggGuuagcucaagcgg.....     | 1   | 1 | j23 |

cuaccgggucggaguuagcucaagcgguuaccuccuacugcggacuuucuaucuguccaucucugucgggguuucgagaccgcgggugcuuacugaccuuuuuag

|                                      |     |   |     |
|--------------------------------------|-----|---|-----|
| ...ccgggucggaguuagcCcaagcgggu.....   | 1   | 1 | j23 |
| ...cUgggucggaguuagcucaagcgggu.....   | 1   | 1 | j23 |
| ...Acgggucggaguuagcucaagcgggu.....   | 1   | 1 | j23 |
| ...ccgggAcggaguuagcucaagcgggu.....   | 1   | 1 | j23 |
| ...ccgggucggaguuagcucaagcggA.....    | 5   | 1 | j23 |
| ...ccgggucggaguuagcucaagcCgu.....    | 1   | 1 | j23 |
| ...ccgggucggaguuagcucaaaUcgggu.....  | 1   | 1 | j23 |
| ...ccgggucggaguuagcucaagcggG.....    | 4   | 1 | j23 |
| ...ccgggucggaguuagcucaagcggC.....    | 1   | 1 | j23 |
| ...ccgggucggaguuagUucaagcgggu.....   | 1   | 1 | j23 |
| ...ccgggGcggaguuagcucaagcgggu.....   | 2   | 1 | j23 |
| ...ccgggucggagGuagcucaagcgggu.....   | 2   | 1 | j23 |
| ...ccgggGcggaguuagcucaagcggguu.....  | 1   | 1 | j23 |
| ...ccgggucggGguuagcucaagcgggu.....   | 1   | 1 | j23 |
| ...ccgggucggaguuagcucaagcggguA.....  | 5   | 1 | j23 |
| ...ccgggucggaguuagcGcaagcgggu.....   | 1   | 1 | j23 |
| ...ccgggucggaguuagcucaagcgggu.....   | 4   | 0 | j23 |
| ...ccgggucGcaguuagcucaagcgggu.....   | 1   | 1 | j23 |
| ...ccgggucggaguuagcucaagcggguAa..... | 7   | 1 | j23 |
| ...cgggucggaguuagcucaag.....         | 11  | 0 | j23 |
| ...cgggucggagGuagcucaag.....         | 1   | 1 | j23 |
| ...cgggucggaguuagcucaaU.....         | 1   | 1 | j23 |
| ...cgggucggaguuagcucaagG.....        | 1   | 1 | j23 |
| ...cggUucggaguuagcucaagc.....        | 1   | 1 | j23 |
| ...Agggucggaguuagcucaagc.....        | 1   | 1 | j23 |
| ...cgggucggaguuagcucaagA.....        | 2   | 1 | j23 |
| ...cgggucggaguuagcucaagc.....        | 19  | 0 | j23 |
| ...cgggucggagCuagcucaagcgg.....      | 1   | 1 | j23 |
| ...cgggCcgaguuagcucaagcgg.....       | 2   | 1 | j23 |
| ...cgggucggaguuagcucaagcA.....       | 4   | 1 | j23 |
| ...cgggGcggaguuagcucaagcgg.....      | 10  | 1 | j23 |
| ...cgggucggaguuagcAcaagcgg.....      | 1   | 1 | j23 |
| ...cgggucggaguuagAucaagcgg.....      | 2   | 1 | j23 |
| ...cgCgucggaguuagcucaagcgg.....      | 1   | 1 | j23 |
| ...cgggucggaguuagcuUaagcgg.....      | 1   | 1 | j23 |
| ...cAggucggaguuagcucaagcgg.....      | 1   | 1 | j23 |
| ...cgggucggaguuUcucuagcgg.....       | 1   | 1 | j23 |
| ...cgggucggaguuagcucaagcgg.....      | 144 | 0 | j23 |
| ...cgggucggagGuagcucaagcgg.....      | 5   | 1 | j23 |
| ...cgggucAgaguuagcucaagcgg.....      | 1   | 1 | j23 |
| ...cgggucggaguuCgcucuagcgg.....      | 2   | 1 | j23 |
| ...cgggucggaguuagcucaagcCg.....      | 3   | 1 | j23 |
| ...cgggucggGguuagcucaagcgg.....      | 1   | 1 | j23 |
| ...cgggucggaguuagcuAaagcgg.....      | 6   | 1 | j23 |
| ...cgggucggaguuagcucaaUcgg.....      | 20  | 1 | j23 |
| ...cgggucggAuuagcucaagcgg.....       | 2   | 1 | j23 |
| ...cgggucggaguuagcucaagAgg.....      | 2   | 1 | j23 |
| ...cgggucggagGuagcucaagcgg.....      | 44  | 1 | j23 |
| ...cggCucggaguuagcucaagcgg.....      | 2   | 1 | j23 |
| ...cgggucggaguuagcucaaCcg.....       | 2   | 1 | j23 |
| ...cgggucggaguuagcuGaaagcgg.....     | 5   | 1 | j23 |
| ...cgggucggaguuagUucaagcgg.....      | 7   | 1 | j23 |
| ...cgggucggaguuagcucaagcggU.....     | 8   | 1 | j23 |
| ...cgggucggaguuCgcucuagcgg.....      | 2   | 1 | j23 |
| ...cgCgucggaguuagcucaagcgg.....      | 1   | 1 | j23 |
| ...cgggucAgaguuagcucaagcgg.....      | 3   | 1 | j23 |
| ...Ugggucggaguuagcucaagcgg.....      | 15  | 1 | j23 |
| ...cgggucggaCuuaagcucaagcgg.....     | 4   | 1 | j23 |
| ...cgggucggaguuagGcucaagcgg.....     | 8   | 1 | j23 |
| ...cAggucggaguuagcucaagcgg.....      | 2   | 1 | j23 |
| ...cgggucggaguuCagcucaagcgg.....     | 7   | 1 | j23 |
| ...cgggucggaguuagcAcaagcgg.....      | 1   | 1 | j23 |
| ...cgggucggaguuagcGcaagcgg.....      | 11  | 1 | j23 |
| ...cgggucGcaguuagcucaagcgg.....      | 1   | 1 | j23 |
| ...cgggGcggaguuagcucaagcgg.....      | 97  | 1 | j23 |
| ...cgggucggaguuagcucaagcggA.....     | 13  | 1 | j23 |
| ...cgggAcggaguuagcucaagcgg.....      | 1   | 1 | j23 |
| ...cgggucggCguuagcucaagcgg.....      | 4   | 1 | j23 |
| ...cgggucggaguuagcGagcgg.....        | 1   | 1 | j23 |

cuaccgggucgggaguuagcucaagcgguuaccucucuaugcggacuuucuaucuguccaucucugucgggguuucgagaccgcgggugcuuacugaccuuuuuag

|                                     |      |   |     |
|-------------------------------------|------|---|-----|
| .....cgggucgggaguuagAucaagcgg.....  | 1    | 1 | j23 |
| .....cgggucgggaguuagcucaagcgc.....  | 3    | 1 | j23 |
| .....cgggucgggaguuagcucaagcgg.....  | 2    | 1 | j23 |
| .....cgggucgggaguuagcucaagcUg.....  | 1    | 1 | j23 |
| .....cgggucgggagCuaagcucaagcgg..... | 4    | 1 | j23 |
| .....cgggucgUaguuagcucaagcgg.....   | 4    | 1 | j23 |
| .....Agggucgggaguuagcucaagcgg.....  | 5    | 1 | j23 |
| .....cgggucgCaguuagcucaagcgg.....   | 4    | 1 | j23 |
| .....cgggucgggaguuagcucaagcAg.....  | 1    | 1 | j23 |
| .....cgggucgggaguuagcuUaagcgg.....  | 4    | 1 | j23 |
| .....cgggucgggaguuagcucaagcgg.....  | 2026 | 0 | j23 |
| .....cgggCcgaguuagcucaagcgg.....    | 17   | 1 | j23 |
| .....Ggggucgggaguuagcucaagcgg.....  | 2    | 1 | j23 |
| .....cCggucgggaguuagcucaagcgg.....  | 4    | 1 | j23 |
| .....cggguGggaguuagcucaagcgg.....   | 2    | 1 | j23 |
| .....cggUucgggaguuagcucaagcgg.....  | 3    | 1 | j23 |
| .....cgggucgggaguuacCucaagcgg.....  | 2    | 1 | j23 |
| .....cgggucgggUguuagcucaagcgg.....  | 1    | 1 | j23 |
| .....cgggucgggaguuagcCcaagcgg.....  | 10   | 1 | j23 |
| .....cgggucgggaguuagcucaagUgg.....  | 3    | 1 | j23 |
| .....cgggucgggaguuagcucaCgcgg.....  | 3    | 1 | j23 |
| .....cgggucgggaguuagcucCagcgg.....  | 8    | 1 | j23 |
| .....cgggucgggaguuGgcucaagcgg.....  | 1    | 1 | j23 |
| .....cgggucgggaguuagcucUagcgg.....  | 1    | 1 | j23 |
| .....cggAucgggaguuagcucaagcgg.....  | 1    | 1 | j23 |
| .....cggguUggaguuagcucaagcgg.....   | 3    | 1 | j23 |
| .....cggguAggaguuagcucaagcgg.....   | 1    | 1 | j23 |
| .....cgggucgggaguuagcucaaCcggu..... | 4    | 1 | j23 |
| .....Ugggucgggaguuagcucaagcgg.....  | 17   | 1 | j23 |
| .....cgggAcgggaguuagcucaagcgg.....  | 21   | 1 | j23 |
| .....cgggucgggaguuagcucaagcUu.....  | 1    | 1 | j23 |
| .....cgggucgggaguuagcAcaagcgg.....  | 1    | 1 | j23 |
| .....cgggucgCaguuagcucaagcgg.....   | 4    | 1 | j23 |
| .....cgggucgggaguuagcucaagUggu..... | 10   | 1 | j23 |
| .....cgggucgggaguuagcucaagcgg.....  | 5    | 1 | j23 |
| .....cgggucCgaguuagcucaagcgg.....   | 2    | 1 | j23 |
| .....cgggucgggaguuagAucaagcgg.....  | 6    | 1 | j23 |
| .....cgggucgggaguuagcGcaagcgg.....  | 14   | 1 | j23 |
| .....cgggucgggaguuagcucaagcAgu..... | 2    | 1 | j23 |
| .....cgggucgggaguuagcucaCgcgg.....  | 15   | 1 | j23 |
| .....cgggucgggaguuagcucaagcggA..... | 133  | 1 | j23 |
| .....cgggucggaCuuaagcucaagcgg.....  | 6    | 1 | j23 |
| .....cgggucggaUuuagcucaagcgg.....   | 1    | 1 | j23 |
| .....cgggucgggaguuagcuGagcgg.....   | 6    | 1 | j23 |
| .....cgUucgggaguuagcucaagcgg.....   | 1    | 1 | j23 |
| .....cgggucgggaguuagcuAaagcgg.....  | 12   | 1 | j23 |
| .....cgggucgggaguuagUuaagcgg.....   | 5    | 1 | j23 |
| .....cgggucgggaguuCgcucaagcgg.....  | 2    | 1 | j23 |
| .....cggCucgggaguuagcucaagcgg.....  | 3    | 1 | j23 |
| .....cgggucgggaguuagcucaagcggG..... | 54   | 1 | j23 |
| .....cggguAgggaguuagcucaagcgg.....  | 6    | 1 | j23 |
| .....cgggucgggaguuagGuaagcgg.....   | 10   | 1 | j23 |
| .....cggguUgggaguuagcucaagcgg.....  | 6    | 1 | j23 |
| .....cgggucgggaguuagcucaGgcgg.....  | 2    | 1 | j23 |
| .....cgggucAagaguuagcucaagcgg.....  | 2    | 1 | j23 |
| .....cgggucgggagAuaagcucaagcgg..... | 3    | 1 | j23 |
| .....cgggucgggagGuaagcucaagcgg..... | 89   | 1 | j23 |
| .....Ggggucgggaguuagcucaagcgg.....  | 4    | 1 | j23 |
| .....cgggucgggaguuGgcucaagcgg.....  | 1    | 1 | j23 |
| .....cgggucgggaguuagcucUagcgg.....  | 1    | 1 | j23 |
| .....cgggucgggaguuagcucaagcCgu..... | 2    | 1 | j23 |
| .....cgggucgggGguuagcucaagcgg.....  | 4    | 1 | j23 |
| .....cUggucgggaguuagcucaagcgg.....  | 3    | 1 | j23 |
| .....cgggucgggaguuagcucaagcUgu..... | 1    | 1 | j23 |
| .....cgggucgggaguuagcucaagcgg.....  | 3351 | 0 | j23 |
| .....cgggucgggaguuacCucaagcgg.....  | 3    | 1 | j23 |
| .....cCggucgggaguuagcucaagcgg.....  | 7    | 1 | j23 |
| .....cgggucgggaguuUcucaagcgg.....   | 2    | 1 | j23 |
| .....cgggCcgaguuagcucaagcgg.....    | 35   | 1 | j23 |

cuaccgggucgggaguuagcucaagcgguuaccuccuacugcgggacuuucuaucuguccaucucugugcgggguuucgagaccgcgggugcuuacugaccuuuuuag

|                                           |     |   |     |
|-------------------------------------------|-----|---|-----|
| .....cgggucgggaguuagcucaagAggu.....       | 6   | 1 | j23 |
| .....cgggucgggaguuagcucaagGggu.....       | 8   | 1 | j23 |
| .....cgggucgggaguuagcucaagcgggu.....      | 4   | 1 | j23 |
| .....cgggucgggaguuagcucaaUcgggu.....      | 24  | 1 | j23 |
| .....cgggucgggaguuagcucCagcgggu.....      | 4   | 1 | j23 |
| .....cgggucgggaguuagcucaagcgggu.....      | 2   | 1 | j23 |
| .....cgggucgggaguuagcucaagcgggu.....      | 3   | 1 | j23 |
| .....cgggucgggaguuagcucaagcgggu.....      | 5   | 1 | j23 |
| .....cgggucgggaguuagcucaagcgggu.....      | 7   | 1 | j23 |
| .....cgggucgggaguuagcucaagcgggu.....      | 3   | 1 | j23 |
| .....cgggucgggaguuagcucaagcgggu.....      | 11  | 1 | j23 |
| .....cgggucgggaguuagcucaagcgggu.....      | 7   | 1 | j23 |
| .....cgggucgggaguuagcucGagcgggu.....      | 3   | 1 | j23 |
| .....Agggucgggaguuagcucaagcgggu.....      | 4   | 1 | j23 |
| .....cggUucgggaguuagcucaagcgggu.....      | 4   | 1 | j23 |
| .....cgggucgggaguuagcucaagcggGC.....      | 83  | 1 | j23 |
| .....cgggGcgggaguuagcucaagcgggu.....      | 227 | 1 | j23 |
| .....cgggucgggUguuagcucaagcgggu.....      | 1   | 1 | j23 |
| .....cgggucgggaguuagcuUaagcgggu.....      | 8   | 1 | j23 |
| .....cgggucgggaguuagcucaaAcggu.....       | 1   | 1 | j23 |
| .....cgCgucgggaguuagcucaagcgggu.....      | 1   | 1 | j23 |
| .....cgggucgggaguuagcucaagcggGu.....      | 7   | 1 | j23 |
| .....cgggucgggaguuagcucaagAgggu.....      | 1   | 1 | j23 |
| .....cgggucgggaguuagcuUaagcgggu.....      | 1   | 1 | j23 |
| .....cgggucgggaguuUcuaagcgggu.....        | 1   | 1 | j23 |
| .....cgggAcgggaguuagcucaagcgggu.....      | 1   | 1 | j23 |
| .....cgggucCgaguuagcucaagcgggu.....       | 1   | 1 | j23 |
| .....cggUucgggaguuagcucaagcgggu.....      | 2   | 1 | j23 |
| .....cgggucgggaguuagcucaagcggGu.....      | 5   | 1 | j23 |
| .....cgggucgggaguuagcucaaUcgggu.....      | 2   | 1 | j23 |
| .....cgggucgggaguuagcuUaagcgggu.....      | 3   | 1 | j23 |
| .....cgggucgggaguuagcuGaaagcgggu.....     | 1   | 1 | j23 |
| .....cgggucgggaguuagcucaagcggguG.....     | 7   | 1 | j23 |
| .....cgggucgggaguuagcucaCgagggu.....      | 2   | 1 | j23 |
| .....cgggucgggaguuagGucaagcgggu.....      | 1   | 1 | j23 |
| .....cgggucgggaguuagcucaagcgggu.....      | 1   | 1 | j23 |
| .....cggguUaggaguuagcucaagcgggu.....      | 3   | 1 | j23 |
| .....cggAuaggaguuagcucaagcgggu.....       | 2   | 1 | j23 |
| .....cgggucgggaguuagcucaagcgggu.....      | 1   | 1 | j23 |
| .....cgggucgggaguuagcucaagcgggu.....      | 238 | 1 | j23 |
| .....Ggggucgggaguuagcucaagcgggu.....      | 2   | 1 | j23 |
| .....cgggucgggaguuagcuCaaagcgggu.....     | 1   | 1 | j23 |
| .....cgggucgggaguuagcucaagcgggu.....      | 364 | 0 | j23 |
| .....cgggucgggaguuagcucaagcggguC.....     | 2   | 1 | j23 |
| .....cgggucgggaguuagcuGaaagcgggu.....     | 1   | 1 | j23 |
| .....cgggucgggaguuagcucaagcgggu.....      | 9   | 1 | j23 |
| .....cgggCgggaguuagcucaagcgggu.....       | 4   | 1 | j23 |
| .....cgggucgggaguuaggucaagcgggu.....      | 1   | 1 | j23 |
| .....cgggGcgggaguuagcucaagcgggu.....      | 18  | 1 | j23 |
| .....cgggucgggaguuagcucaagcggguAa.....    | 117 | 1 | j23 |
| .....cgggGcgggaguuagcucaagcggguAa.....    | 1   | 1 | j23 |
| .....cgggucgggaguuagcucaagcggguAa.....    | 1   | 1 | j23 |
| .....cgggucgggaguuagcucaagcggguAa.....    | 13  | 0 | j23 |
| .....cgggucgggaguuagcucaagcggguAa.....    | 1   | 1 | j23 |
| .....cgggucgggaguuagcucaagcggguU.....     | 49  | 1 | j23 |
| .....cgggucgggaguuagcucaagcggguAa.....    | 2   | 1 | j23 |
| .....cgggucgggaguuagcucaagcggguaccGc..... | 1   | 1 | j23 |
| .....gggucgggaguuagUucaagcgg.....         | 2   | 1 | j23 |
| .....gggucgggaguuagcucaagcgg.....         | 2   | 1 | j23 |
| .....gggucgggaguuagcucaagcgg.....         | 1   | 1 | j23 |
| .....gggucgggaguuagcuGaaagcgg.....        | 1   | 1 | j23 |
| .....gggucgggaguuagGucaagcgg.....         | 1   | 1 | j23 |
| .....gggucgggaguuaggucaagcgg.....         | 1   | 1 | j23 |
| .....gggAcgggaguuagcucaagcgg.....         | 1   | 1 | j23 |
| .....gggucgggaguuagcucaaCcg.....          | 1   | 1 | j23 |
| .....gggucAggaguuagcucaagcgg.....         | 1   | 1 | j23 |
| .....gggucgggaguuagcucaagcgg.....         | 1   | 1 | j23 |
| .....gggGcgggaguuagcucaagcgg.....         | 4   | 1 | j23 |
| .....gggucgggaguuCgcuaagcgg.....          | 1   | 1 | j23 |

cuaccgggucgggaguuagcucaagcgguuaccuccuacugcggacuucuaucuguccaucucugucgggguuucgagaccgcgggugcuuacugaccuuuuuag

|                                       |     |   |     |
|---------------------------------------|-----|---|-----|
| .....gggCcgaguuagcucaagcgg.....       | 1   | 1 | j23 |
| .....Cggucggaguuagcucaagcgg.....      | 2   | 1 | j23 |
| .....gggucggaguuagcucaagcgg.....      | 33  | 0 | j23 |
| .....gggucggaguuagcucaagAggu.....     | 1   | 1 | j23 |
| .....gggucggaguuagUucaagcgg.....      | 2   | 1 | j23 |
| .....gggucggaguuagcucaagcgg.....      | 2   | 1 | j23 |
| .....gUgucggaguuagcucaagcgg.....      | 2   | 1 | j23 |
| .....ggguUggaguuagcucaagcgg.....      | 1   | 1 | j23 |
| .....ggguGggaguuagcucaagcgg.....      | 1   | 1 | j23 |
| .....gCgucggaguuagcucaagcgg.....      | 1   | 1 | j23 |
| .....gggucggaguuagcucaagcUgu.....     | 1   | 1 | j23 |
| .....gggucggagUuagcucaagcgg.....      | 1   | 1 | j23 |
| .....gggCcgaguuagcucaagcgg.....       | 3   | 1 | j23 |
| .....gggGcggaguuagcucaagcgg.....      | 21  | 1 | j23 |
| .....gggucggaguuagcucaaCcg.....       | 2   | 1 | j23 |
| .....Uggucggaguuagcucaagcgg.....      | 1   | 1 | j23 |
| .....gggucggaguuagcucCagcgg.....      | 2   | 1 | j23 |
| .....gggucggaguuagcucaagcgg.....      | 273 | 0 | j23 |
| .....gggucggaguuagLucaagcgg.....      | 1   | 1 | j23 |
| .....gggucggaguuagcucaagcggA.....     | 8   | 1 | j23 |
| .....gggucggaguuagcucaagcggG.....     | 6   | 1 | j23 |
| .....gggucggaguuagcucaagcggC.....     | 5   | 1 | j23 |
| .....gggucggCguuagcucaagcgg.....      | 2   | 1 | j23 |
| .....gggucUgaguuagcucaagcgg.....      | 1   | 1 | j23 |
| .....gggAcggaguuagcucaagcgg.....      | 5   | 1 | j23 |
| .....gggucggaguuagGuaagcgg.....       | 1   | 1 | j23 |
| .....Cggucggaguuagcucaagcgg.....      | 1   | 1 | j23 |
| .....gggucggaguuagcGcaagcgg.....      | 3   | 1 | j23 |
| .....gggucggGguuagcucaagcgg.....      | 3   | 1 | j23 |
| .....gggucggaguuagcuUaagcgg.....      | 2   | 1 | j23 |
| .....gggucggaguuagcucaagGgg.....      | 2   | 1 | j23 |
| .....gggucggagCuagcucaagcgg.....      | 7   | 1 | j23 |
| .....gggucggagGuaagcucaagcgg.....     | 3   | 1 | j23 |
| .....gggucggaguuagcucaagcggCu.....    | 1   | 1 | j23 |
| .....gggucggaguuagcGcaagcgguu.....    | 3   | 1 | j23 |
| .....gggucggaguuagcucaagcgguu.....    | 108 | 0 | j23 |
| .....gggucggaguuagcucaagcgguaA.....   | 38  | 1 | j23 |
| .....gggucggagCuagcucaagcgguu.....    | 1   | 1 | j23 |
| .....gggucggaguuagcuUaagcgguu.....    | 1   | 1 | j23 |
| .....gggucggagGuaagcucaagcgguu.....   | 2   | 1 | j23 |
| .....gggucggaguuagcucaagcgguu.....    | 1   | 1 | j23 |
| .....gggucggaguuagcucUagcgguu.....    | 2   | 1 | j23 |
| .....gggucggagLuagcucaagcgguu.....    | 1   | 1 | j23 |
| .....gggucggaguuagcucaagcgguG.....    | 1   | 1 | j23 |
| .....gggucggaguuagcuLaagcgguu.....    | 1   | 1 | j23 |
| .....gggucggaguuagcucaagcggG.....     | 2   | 1 | j23 |
| .....gggGcggaguuagcucaagcgguu.....    | 7   | 1 | j23 |
| .....gggucggaguuagcucCagcgguu.....    | 2   | 1 | j23 |
| .....gggCcgaguuagcucaagcgguu.....     | 1   | 1 | j23 |
| .....gggucggaguuagcucaagcgguu.....    | 1   | 1 | j23 |
| .....gggucggaguuagcucaagcggCu.....    | 1   | 1 | j23 |
| .....gggucggaguuagcucaagcgguuu.....   | 9   | 0 | j23 |
| .....gggucggaguuagcucaagcgguuU.....   | 68  | 1 | j23 |
| .....gggucggaguuagcucaagcgguuA.....   | 11  | 1 | j23 |
| .....gggucggaguuagcucaagcgguuG.....   | 1   | 1 | j23 |
| .....gggucggaguuagcucaagcgguuac.....  | 1   | 0 | j23 |
| .....gggucggaguuagcucaagcgguuAA.....  | 3   | 1 | j23 |
| .....gggucggaguuagcucaagcgguuacc..... | 1   | 0 | j23 |
| .....ggucggaguuagcucaagcgguu.....     | 1   | 0 | j23 |
| .....ucggaguuagcucaagcgguu.....       | 1   | 0 | j23 |
| .....ggaguuuUcucaagcgg.....           | 1   | 1 | j23 |
| .....ggaguuagUucaagcgg.....           | 1   | 1 | j23 |
| .....ggaguuagcucaagcgg.....           | 4   | 0 | j23 |
| .....ggaguuagcucaagcggA.....          | 1   | 1 | j23 |
| .....ggaguuagcucaagcgguaA.....        | 1   | 1 | j23 |
| .....uuaccuccuacugcggacuu.....        | 1   | 0 | j23 |
| .....uaccuccuacGcggacuu.....          | 1   | 1 | j23 |
| .....uaccuccuacugcggacuu.....         | 3   | 0 | j23 |
| .....uaccuccuacugcggacuuu.....        | 1   | 0 | j23 |

cuaccgggucggaguagcucaagcgguuaccuccuacugcgggacuuuauucuguccaucugugcgggguuucgagaccgcggggucuuacugaccuuuuuag

|                                   |      |   |     |
|-----------------------------------|------|---|-----|
| .....cugugcgggguuucgagac.....     | 1    | 0 | j23 |
| .....accgcgggugucuuacugac.....    | 1    | 0 | j23 |
| .....accgcgggugucuuacugacc.....   | 1    | 0 | j23 |
| .....accgcggggCgcuuacugaccuuu.... | 1    | 1 | j23 |
| .....Acgcgggugucuuacugaccuu.....  | 1    | 1 | j23 |
| .....cgcggggucuuacugacc.....      | 4    | 0 | j23 |
| .....cgcggggUcuuacugaccu.....     | 2    | 1 | j23 |
| .....cgcggggucuuacugaUccu.....    | 1    | 1 | j23 |
| .....cgcggggCgcuuacugaccu.....    | 2    | 1 | j23 |
| .....cgcggggucuuacugaccu.....     | 54   | 0 | j23 |
| .....cgcggggGcuuacugaccu.....     | 2    | 1 | j23 |
| .....cgcgUgugucuuacugaccu.....    | 1    | 1 | j23 |
| .....cgcggggucuuacugaccG.....     | 1    | 1 | j23 |
| .....cgcggggucuuagugaccu.....     | 1    | 1 | j23 |
| .....cgcggggAgcuuacugaccu.....    | 2    | 1 | j23 |
| .....cCcggggucuuacugaccuu.....    | 1    | 1 | j23 |
| .....cAcgggugucuuacugaccuu.....   | 4    | 1 | j23 |
| .....cgGgggugucuuacugaccuu.....   | 2    | 1 | j23 |
| .....cGcgggugucuuacugaccuG.....   | 4    | 1 | j23 |
| .....cUcgggugucuuacugaccuu.....   | 1    | 1 | j23 |
| .....cgcgUgucuuacugaccuu.....     | 1    | 1 | j23 |
| .....cgUgggugucuuacugaccuu.....   | 4    | 1 | j23 |
| .....cgcggggucuuacugaAccuu.....   | 6    | 1 | j23 |
| .....cgcggggucuuacugaccG.....     | 10   | 1 | j23 |
| .....cgcggggucuuacugaccCu.....    | 4    | 1 | j23 |
| .....cgcgggugcCucugaccuu.....     | 6    | 1 | j23 |
| .....cgcggggucuuacugaUccuu.....   | 4    | 1 | j23 |
| .....cgcgggCugucuuacugaccuu.....  | 2    | 1 | j23 |
| .....cgcggggucuuacugaccG.....     | 2    | 1 | j23 |
| .....cgcggggucuuacugacGcu.....    | 3    | 1 | j23 |
| .....cgcgggugcGucugaccuu.....     | 4    | 1 | j23 |
| .....cgcggggucuuUgaccuu.....      | 13   | 1 | j23 |
| .....cgcgUgucuuacugaccuu.....     | 2    | 1 | j23 |
| .....cgcggggUcuuacugaccuu.....    | 3    | 1 | j23 |
| .....cgcggggucuuacuCaaccuu.....   | 1    | 1 | j23 |
| .....cgcggggGcuuacugaccuu.....    | 38   | 1 | j23 |
| .....Ugcggggucuuacugaccuu.....    | 4    | 1 | j23 |
| .....cgcggggucuuacugaccAuu.....   | 8    | 1 | j23 |
| .....cgcAgggugucuuacugaccuu.....  | 3    | 1 | j23 |
| .....cgcggggCgcuuacugaccuu.....   | 57   | 1 | j23 |
| .....cgcggggucuuacGgaccuu.....    | 2    | 1 | j23 |
| .....cgcgUggugucuuacugaccuu.....  | 1    | 1 | j23 |
| .....cgcggggucuuacugaccuA.....    | 24   | 1 | j23 |
| .....cgcggggUAcuuacugaccuu.....   | 1    | 1 | j23 |
| .....cgcggggucuuacugCccuu.....    | 3    | 1 | j23 |
| .....cgcggggUuuacugaccuu.....     | 8    | 1 | j23 |
| .....cgcggggucuuacugacUcu.....    | 2    | 1 | j23 |
| .....cgcggggucuuacugaccUuu.....   | 2    | 1 | j23 |
| .....cgcggggucuuAaugaccuu.....    | 3    | 1 | j23 |
| .....cgcggggUguuacugaccuu.....    | 1    | 1 | j23 |
| .....cgcggggucuuacuUaccuu.....    | 2    | 1 | j23 |
| .....cgcggggAgcuuacugaccuu.....   | 14   | 1 | j23 |
| .....cgcggggucuuacugacAcuu.....   | 4    | 1 | j23 |
| .....cgcggggucuuacugaGccuu.....   | 4    | 1 | j23 |
| .....Agcggggucuuacugaccuu.....    | 3    | 1 | j23 |
| .....cgcggggucuuacuAaccuu.....    | 1    | 1 | j23 |
| .....cgcggggUuuacugaccuu.....     | 1    | 1 | j23 |
| .....cgcggggucuuacCGaccuu.....    | 3    | 1 | j23 |
| .....cgcgCgugucuuacugaccuu.....   | 1    | 1 | j23 |
| .....cgcggggucuuagugaccuu.....    | 1    | 1 | j23 |
| .....cgcggggucuuacugaccuC.....    | 3    | 1 | j23 |
| .....cgcggggUcuuacugaccuu.....    | 1    | 1 | j23 |
| .....cgcggggucuuacugaccuu.....    | 1116 | 0 | j23 |
| .....cgAggggucuuacugaccuu.....    | 2    | 1 | j23 |
| .....cgcggggucugacugaccuu.....    | 5    | 1 | j23 |
| .....cgcggggucuuCugaccuu.....     | 4    | 1 | j23 |
| .....cgcggggCgcuuacugaccuu.....   | 20   | 1 | j23 |
| .....cgcggggucuuacugaccAuu.....   | 1    | 1 | j23 |
| .....cgcggggucuuacugUccuu.....    | 1    | 1 | j23 |



cuaccgggucggaguuagcucaagcgguuaccuccuacugcgggacuuucuaucuguccaucucugucgggguuucgagaccgcggggucuuacugaccuuuuuug

|                                   |     |   |     |
|-----------------------------------|-----|---|-----|
| .....cgcggggGcuuacugaccuuu....    | 11  | 1 | j23 |
| .....cgcggggUcuuacugaccuuu....    | 2   | 1 | j23 |
| .....cgcgggAuguuacugaccuuu....    | 1   | 1 | j23 |
| .....cgcggggucuuacuUaccuuu....    | 1   | 1 | j23 |
| .....cgcggggucuuacugaAaccuuu....  | 3   | 1 | j23 |
| .....cgcggggucuuacugaccuuG....    | 1   | 1 | j23 |
| .....cgcggggucuuuUugaccuuu....    | 2   | 1 | j23 |
| .....cgcggggucuuacugaccuuAu....   | 8   | 1 | j23 |
| .....cgcggggUuuacugaccuuu....     | 4   | 1 | j23 |
| .....cgcggggucCuaacugaccuuu....   | 1   | 1 | j23 |
| .....cgcggggGuaacugaccuuu....     | 1   | 1 | j23 |
| .....cgcggggucUcugaccuuu....      | 2   | 1 | j23 |
| .....cgcggggucuuacugaccuuu....    | 354 | 0 | j23 |
| .....cgcggggucGacugaccuuu....     | 3   | 1 | j23 |
| .....cgcggggucuuacugaccuuA....    | 6   | 1 | j23 |
| .....cgcggggucuuGugaccuuu....     | 1   | 1 | j23 |
| .....cgcggggucuuacugaUccuuu....   | 1   | 1 | j23 |
| .....cgcgggUuguuacugaccuuu....    | 1   | 1 | j23 |
| .....cgcggggucuuacugacUccuuu....  | 1   | 1 | j23 |
| .....cgCGggucuuacugaccuuu....     | 1   | 1 | j23 |
| .....cgcggggAguuacugaccuuu....    | 8   | 1 | j23 |
| .....cgcggggucuuacugaGccuuu....   | 1   | 1 | j23 |
| .....Agcggggucuuacugaccuuu....    | 1   | 1 | j23 |
| .....cgcggggucuuacuCaccuuu....    | 2   | 1 | j23 |
| .....cgcggggAuuaacugaccuuu....    | 1   | 1 | j23 |
| .....cgcggggucuuacugaccGuu....    | 2   | 1 | j23 |
| .....cgcggggucCacugaccuuu....     | 1   | 1 | j23 |
| .....cgcggggucuuacugacAuuu....    | 3   | 1 | j23 |
| .....cgcggggucuuacugaccUuuu....   | 1   | 1 | j23 |
| .....cgcggggucuuacugaccuuG....    | 1   | 1 | j23 |
| .....cgcggggucuuacugaccuuuA....   | 9   | 1 | j23 |
| .....Ugcggggucuuacugaccuuu....    | 1   | 1 | j23 |
| .....cgcggggucuuacugaccuuAu....   | 1   | 1 | j23 |
| .....cgcggggucuuacugacGuuu....    | 1   | 1 | j23 |
| .....cgcggggucuuacugaccuuuu....   | 7   | 0 | j23 |
| .....cgcggggucuuacugaccuuuAa....  | 2   | 1 | j23 |
| .....gcggggGcuuacugaccuu....      | 1   | 1 | j23 |
| .....gcggggucuuacugaccuu....      | 1   | 0 | j23 |
| ..accgggucggaguuagcucaag....      | 1   | 0 | s05 |
| ..accgggucggaguuagcuUaagcg....    | 1   | 1 | s05 |
| ..accgggucggaguuagcucaagcgg....   | 6   | 0 | s05 |
| ..accgggucggaguuagcucaagcggg....  | 4   | 0 | s05 |
| ..accgggGcggaguuagcucaagcgguu.... | 1   | 1 | s05 |
| ..accgggucggaguuagcucaagcgUuu.... | 1   | 1 | s05 |
| ..accgggucggaguuagcucaagcgguu.... | 4   | 0 | s05 |
| ..ccgggucggaguuagcucaag....       | 1   | 0 | s05 |
| ..ccgggucggaguuagcucaagc....      | 2   | 0 | s05 |
| ..ccgggucggaguuagcucaagcgg....    | 4   | 0 | s05 |
| ..Accgggucggaguuagcucaagcgg....   | 2   | 1 | s05 |
| ..cgggucggaguuagcucaCgcgg....     | 1   | 1 | s05 |
| ..ccgggGcggaguuagcucaagcgguu....  | 1   | 1 | s05 |
| ..Accgggucggaguuagcucaagcgguu.... | 1   | 1 | s05 |
| ..cgggucggaguuagcucaag....        | 2   | 0 | s05 |
| ..cgggucggaguuagcucaagc....       | 1   | 0 | s05 |
| ..ccgggucggaguuagcucaagcU....     | 1   | 1 | s05 |
| ..cgggucggaguuagcucaagcgg....     | 13  | 0 | s05 |
| ..cgggucggaguuagcucaagAgg....     | 1   | 1 | s05 |
| ..cgggucggaguuagcucCagcgg....     | 1   | 1 | s05 |
| ..cgggucggaguuagcucaagcgg....     | 82  | 0 | s05 |
| ..cgggucggaguuuUcuaagcgg....      | 1   | 1 | s05 |
| ..cgggucggaguuagcGcaagcgg....     | 1   | 1 | s05 |
| ..cgggucggaguuagcucaaUcgg....     | 1   | 1 | s05 |
| ..cgggucggaguuagcucaCgcgg....     | 1   | 1 | s05 |
| ..ccgggucgUaguuagcucaagcgg....    | 1   | 1 | s05 |
| ..ccgggGcggaguuagcucaagcgg....    | 1   | 1 | s05 |
| ..ccgggucggaguuagcucaagcggA....   | 4   | 1 | s05 |
| ..cggcCucggaguuagcucaagcgg....    | 1   | 1 | s05 |
| ..ccgggucggaguuagcucaagcggC....   | 1   | 1 | s05 |

cuaccgggucggaguuagcucaagcgguuaccuccuacugcggacuuucuaucuguccaucucugugcgggguuucgagaccgcggggugcuuacugaccuuuuuag

|                                     |     |   |     |
|-------------------------------------|-----|---|-----|
| ...AcgggucggaguuagcucaagcgggU.....  | 1   | 1 | s05 |
| ...ccgggucggCguuagcucaagcgggU.....  | 1   | 1 | s05 |
| ...ccgggucggaguuagcucCagcgggU.....  | 5   | 1 | s05 |
| ...ccgggucggaguuagcucaagcgggU.....  | 1   | 1 | s05 |
| ...ccgggucggaguuagcucaagcggG.....   | 4   | 1 | s05 |
| ...ccgggucggaguuagcuUaaagcgggU..... | 1   | 1 | s05 |
| ...ccgggucggaguuagcucaCgcgggU.....  | 1   | 1 | s05 |
| ...ccgggucggaguuagcucaaUcgggU.....  | 1   | 1 | s05 |
| ...ccgggucggaguuagcucaagcgggU.....  | 161 | 0 | s05 |
| ...GcgggucggaguuagcucaagcgggU.....  | 1   | 1 | s05 |
| ...ccgggucggaguuagcucaagcggU.....   | 1   | 1 | s05 |
| ...ccgggucggaguuagcucaagcgguu.....  | 17  | 0 | s05 |
| ...ccgggucggaguuagcucaagcgggA.....  | 3   | 1 | s05 |
| ...ccgggucggaguuagcucCagcgggUU..... | 2   | 1 | s05 |
| ...ccgggucggaguuagcucaCgcgggUU..... | 1   | 1 | s05 |
| ...ccgggucggaguuagcucaaUcgggUU..... | 1   | 1 | s05 |
| ...ccgggucggaguuagcucaagcgggUU..... | 1   | 1 | s05 |
| ...cgggucggaguuagcucaa.....         | 2   | 0 | s05 |
| ...cgggucggaguuagcucaG.....         | 1   | 1 | s05 |
| ...cgggucggaguuagcucaCg.....        | 1   | 1 | s05 |
| ...cgggucggaguuagcucaag.....        | 1   | 1 | s05 |
| ...cgggucggaguuagcucaag.....        | 27  | 0 | s05 |
| ...cgggGcggaguuagcucaag.....        | 2   | 1 | s05 |
| ...cgggucggaguuagcucCagc.....       | 1   | 1 | s05 |
| ...cgggucggaguuagcucaCgc.....       | 2   | 1 | s05 |
| ...cgggucggaguuagcucaaUc.....       | 1   | 1 | s05 |
| ...cgggucggaguuagcucaagA.....       | 1   | 1 | s05 |
| ...cgggCcgaguuagcucaagc.....        | 1   | 1 | s05 |
| ...cgggGcggaguuagcucaagc.....       | 1   | 1 | s05 |
| ...cgggucggaguuagcucaagc.....       | 47  | 0 | s05 |
| ...cgggucggCguuagcucaagcgc.....     | 5   | 1 | s05 |
| ...cggCucggaguuagcucaagcgc.....     | 1   | 1 | s05 |
| ...cgggucggaguuagcuUaaagcgc.....    | 1   | 1 | s05 |
| ...cgggucggaguuagcucaCgcgc.....     | 6   | 1 | s05 |
| ...cgggucggaguuagcucaagcgc.....     | 294 | 0 | s05 |
| ...cUgggucggaguuagcucaagcgc.....    | 2   | 1 | s05 |
| ...cgUgucggaguuagcucaagcgc.....     | 1   | 1 | s05 |
| ...cgggucggaguuagcucaagcgc.....     | 2   | 1 | s05 |
| ...Ggggucggaguuagcucaagcgc.....     | 1   | 1 | s05 |
| ...cgggucggaguuagcucaaUcgc.....     | 3   | 1 | s05 |
| ...cgggucggaguuagcucaagcU.....      | 2   | 1 | s05 |
| ...cgggucggaguuagcGcaagcgc.....     | 1   | 1 | s05 |
| ...cgggucggaguuUcuaagcgc.....       | 1   | 1 | s05 |
| ...cgggGcggaguuagcucaagcgc.....     | 9   | 1 | s05 |
| ...cgggucggagGuaagcucaagcgc.....    | 2   | 1 | s05 |
| ...cgggAcggaguuagcucaagcgc.....     | 1   | 1 | s05 |
| ...cgggucggaguuagcucaagcA.....      | 3   | 1 | s05 |
| ...cgggucggaguuGgcuaagcgcgc.....    | 1   | 1 | s05 |
| ...cgggucggagCuaagcucaagcgcgc.....  | 1   | 1 | s05 |
| ...Agggucggaguuagcucaagcgcgc.....   | 2   | 1 | s05 |
| ...cgggucggaguuagcucaagcgcU.....    | 12  | 1 | s05 |
| ...cgggucggGguuagcucaagcgcgc.....   | 1   | 1 | s05 |
| ...cgCgucggaguuagcucaagcgcgc.....   | 1   | 1 | s05 |
| ...cgggucggaguuagcCcaagcgcgc.....   | 3   | 1 | s05 |
| ...cggUucggaguuagcucaagcgcgc.....   | 3   | 1 | s05 |
| ...cgggucggaguuagcucaCgcgcgc.....   | 35  | 1 | s05 |
| ...cgggucggagGuaagcucaagcgcgc.....  | 18  | 1 | s05 |
| ...cgggucgUaguuagcucaagcgcgc.....   | 6   | 1 | s05 |
| ...cgggucggaguuagcucaagcgcC.....    | 5   | 1 | s05 |
| ...cgggucggaguuUcuaagcgcgc.....     | 9   | 1 | s05 |
| ...cgggucUgaguuagcucaagcgcgc.....   | 3   | 1 | s05 |
| ...cgggucggaguuagcucGagcgcgc.....   | 1   | 1 | s05 |
| ...Ggggucggaguuagcucaagcgcgc.....   | 2   | 1 | s05 |
| ...cgggGcggaguuagcucaagcgcgc.....   | 83  | 1 | s05 |
| ...cgggucggaguuagcucaaUcgcgc.....   | 45  | 1 | s05 |
| ...cgggucggaguuagcAcaagcgcgc.....   | 1   | 1 | s05 |
| ...cgggucggaguuagcucaaCgcgc.....    | 7   | 1 | s05 |
| ...cgggCcgaguuagcucaagcgcgc.....    | 2   | 1 | s05 |
| ...cgggucggaguuACuaagcgcgc.....     | 1   | 1 | s05 |

cuaccgggucgggaguuagcucaagcgguuaccucucuaugcgggacuuucuaucuguccaucucugugcgggguuucgagaccgcgggugcuuacugaccuuuuuug

|                                       |      |   |     |
|---------------------------------------|------|---|-----|
| .....cgggucggCguuagcucaagcgg.....     | 8    | 1 | s05 |
| .....cgggucgggaguuagcucaagAgg.....    | 3    | 1 | s05 |
| .....cgggucgggaguuagcucaagcgg.....    | 31   | 1 | s05 |
| .....cgggucgggAuuagcucaagcgg.....     | 1    | 1 | s05 |
| .....cgggucgggaguuagcucaUgcgg.....    | 1    | 1 | s05 |
| .....cggCucgggaguuagcucaagcgg.....    | 1    | 1 | s05 |
| .....cgggucgAaguuagcucaagcgg.....     | 1    | 1 | s05 |
| .....cgUgucgggaguuagcucaagcgg.....    | 4    | 1 | s05 |
| .....cgggucgggaguuagcucaagcgg.....    | 1    | 1 | s05 |
| .....cgggAcgggaguuagcucaagcgg.....    | 2    | 1 | s05 |
| .....cgggucgggaguuagcucaGgcgg.....    | 2    | 1 | s05 |
| .....cgggucgggaguuagcucaagcUg.....    | 12   | 1 | s05 |
| .....cUggucgggaguuagcucaagcgg.....    | 5    | 1 | s05 |
| .....cCggucgggaguuagcucaagcgg.....    | 3    | 1 | s05 |
| .....cgggucCgaguuagcucaagcgg.....     | 1    | 1 | s05 |
| .....cgggucgggaguuagcucaagcgg.....    | 2443 | 0 | s05 |
| .....cgggucgggaguuagcucaagcgg.....    | 1    | 1 | s05 |
| .....cgggucgggaguuCgcucaagcgg.....    | 5    | 1 | s05 |
| .....cgggucgggaguuagcucaagcCg.....    | 1    | 1 | s05 |
| .....cggAucgggaguuagcucaagcgg.....    | 1    | 1 | s05 |
| .....cgggucAaguuagcucaagcgg.....      | 6    | 1 | s05 |
| .....cgggucgggaguuagcucaagcgg.....    | 1    | 1 | s05 |
| .....cgggucgggaguuagcucaaaLcgg.....   | 2    | 1 | s05 |
| .....cgggucgggaguuagcucaUagcgg.....   | 4    | 1 | s05 |
| .....cggguGggaguuagcucaagcgg.....     | 1    | 1 | s05 |
| .....cgggucgggUguuagcucaagcgg.....    | 1    | 1 | s05 |
| .....cgggucgCaguagcucaagcgg.....      | 1    | 1 | s05 |
| .....Ugggucgggaguuagcucaagcgg.....    | 2    | 1 | s05 |
| .....cgggucgggaguuagcucaagcGΛ.....    | 15   | 1 | s05 |
| .....cgggucgggaguuagΛucaagcgg.....    | 1    | 1 | s05 |
| .....cgggucgggaguuagcucaagcggG.....   | 10   | 1 | s05 |
| .....cgggucgggaguuagcucaaCcggu.....   | 9    | 1 | s05 |
| .....cgggucgggaguuUcucaagcgggu.....   | 13   | 1 | s05 |
| .....cggUucgggaguuagcucaagcgggu.....  | 4    | 1 | s05 |
| .....cgggucgggGguuagcucaagcgggu.....  | 5    | 1 | s05 |
| .....cCggucgggaguuagcucaagcgggu.....  | 1    | 1 | s05 |
| .....cgggucgggaguuagcucaagcgggu.....  | 4628 | 0 | s05 |
| .....Agggucgggaguuagcucaagcgggu.....  | 5    | 1 | s05 |
| .....cgggucgggaguuagcucaagcΛgu.....   | 4    | 1 | s05 |
| .....cgggucgggaguuagcucaUgcgggu.....  | 3    | 1 | s05 |
| .....cgggucAaguuagcucaagcgggu.....    | 15   | 1 | s05 |
| .....cgggucgggaguuagcucaagcgggu.....  | 46   | 1 | s05 |
| .....cgggucgggaguuagcucaagcGU.....    | 26   | 1 | s05 |
| .....cgggCcgggaguuagcucaagcgggu.....  | 7    | 1 | s05 |
| .....cgggGcgggaguuagcucaagcgggu.....  | 178  | 1 | s05 |
| .....cgggucUgaguuagcucaagcgggu.....   | 5    | 1 | s05 |
| .....cgggucgggaguuagUucaagcgggu.....  | 1    | 1 | s05 |
| .....cgggucgggaguuagcucaagcggC.....   | 21   | 1 | s05 |
| .....cgggucgggaguuAuccuagcgggu.....   | 1    | 1 | s05 |
| .....cgggucgggaguuagcucaGgcgggu.....  | 3    | 1 | s05 |
| .....cgggucgggaguuagcucaCgcgggu.....  | 69   | 1 | s05 |
| .....cgggucgggagCuagcucaagcgggu.....  | 5    | 1 | s05 |
| .....cgggucgggaguuagcucaagUgggu.....  | 1    | 1 | s05 |
| .....cgggucgggaguuagcGcaagcgggu.....  | 5    | 1 | s05 |
| .....cgggucgggaguuagcuUaagcgggu.....  | 1    | 1 | s05 |
| .....cgggucgggCguuagcucaagcgggu.....  | 25   | 1 | s05 |
| .....cUggucgggaguuagcucaagcgggu.....  | 8    | 1 | s05 |
| .....Ggggucgggaguuagcucaagcgggu.....  | 7    | 1 | s05 |
| .....cgggucgggaguuagcucaaaLcgggu..... | 3    | 1 | s05 |
| .....cAggucgggaguuagcucaagcgggu.....  | 1    | 1 | s05 |
| .....cgggucgggaguuagcucaagcGcu.....   | 1    | 1 | s05 |
| .....cgggucgggaguuagΛucaagcgggu.....  | 1    | 1 | s05 |
| .....cgggucgggAuuagcucaagcgggu.....   | 1    | 1 | s05 |
| .....cgggucgggAuuagcucaagcgggu.....   | 5    | 1 | s05 |
| .....cgUgucgggaguuagcucaagcgggu.....  | 4    | 1 | s05 |
| .....Ugggucgggaguuagcucaagcgggu.....  | 6    | 1 | s05 |
| .....cgggucgggaguuAagcucaagcgggu..... | 1    | 1 | s05 |
| .....cgggucgggAuuagcucaagcgggu.....   | 1    | 1 | s05 |
| .....cgggucgggaguuAΛcucaagcgggu.....  | 1    | 1 | s05 |

cuaccgggucgggaguuagcucaagcgguuaccuccuacugcgggacuuucuaucuguccaucucugucgggguuucgagaccgcgggugcuuacugaccuuuuuag

|                                                 |     |   |     |
|-------------------------------------------------|-----|---|-----|
| .....cgggucggagGuaagcucaagcgggu.....            | 30  | 1 | s05 |
| .....cgggucgggaguuagcCcaagcgggu.....            | 2   | 1 | s05 |
| .....cgggucgggaguuagcucGagcgggu.....            | 2   | 1 | s05 |
| .....cgggucgggaguuagcucCagcucaagcgggu.....      | 1   | 1 | s05 |
| .....cgggucgggaguuagcucCaguuaagcucaagcgggu..... | 1   | 1 | s05 |
| .....cgggucgggaguuagcuGaaagcgggu.....           | 1   | 1 | s05 |
| .....cgggucgggaguuagcuAaagcgggu.....            | 3   | 1 | s05 |
| .....cgggucgggaguuagcucaagcUgu.....             | 12  | 1 | s05 |
| .....cgggucgggaguuCgcucaagcgggu.....            | 3   | 1 | s05 |
| .....cgggucgggaguuagcucaagcgggu.....            | 13  | 1 | s05 |
| .....cgggucgggaguuagcucaaUcgggu.....            | 67  | 1 | s05 |
| .....cgggucgggaguuagcucaagcGlu.....             | 2   | 1 | s05 |
| .....cgggucCgaguuagcucaagcgggu.....             | 14  | 1 | s05 |
| .....cggguGggaguuagcucaagcgggu.....             | 1   | 1 | s05 |
| .....cgggucgggaguuagcucaagcgggA.....            | 68  | 1 | s05 |
| .....cgggucgggaguuagGuaagcgggu.....             | 2   | 1 | s05 |
| .....cgggucgggaguuagcucCagcucaagcgggu.....      | 1   | 1 | s05 |
| .....cggCucgggaguuagcucaagcgggu.....            | 1   | 1 | s05 |
| .....cgggucgggaguuagcucaagcgggu.....            | 2   | 1 | s05 |
| .....cgCgucgggaguuagcucaagcgggu.....            | 2   | 1 | s05 |
| .....cgggucgggagluagcucaagcgggu.....            | 1   | 1 | s05 |
| .....cgggucAaggaguuagcucaagcgggu.....           | 1   | 1 | s05 |
| .....cgggAacgggaguuagcucaagcgggu.....           | 5   | 1 | s05 |
| .....cgggucgggaguuagcucaaUcgggu.....            | 4   | 1 | s05 |
| .....cgggucgggaguuagcucaagcggguC.....           | 4   | 1 | s05 |
| .....cgggucgggaguuagcucaagcgggu.....            | 460 | 0 | s05 |
| .....cgggucgggaguuagcucaagcggCu.....            | 4   | 1 | s05 |
| .....cgggucgggaguuagcucaagcgggA.....            | 2   | 1 | s05 |
| .....cgggucgggaguuagcucaagcgggA.....            | 156 | 1 | s05 |
| .....cgggucgggaguuagcucaCgagggu.....            | 14  | 1 | s05 |
| .....Ggggucgggaguuagcucaagcgggu.....            | 1   | 1 | s05 |
| .....cgggucgggaguuagcucaagcggguG.....           | 4   | 1 | s05 |
| .....cgggGcgggaguuagcucaagcgggu.....            | 18  | 1 | s05 |
| .....cUggucgggaguuagcucaagcgggu.....            | 1   | 1 | s05 |
| .....cgggucgggaguuUcucagcgggu.....              | 2   | 1 | s05 |
| .....cgggucgggaguuagcucaagcggUuu.....           | 3   | 1 | s05 |
| .....cgggucgggaguuagcucCagcgggu.....            | 4   | 1 | s05 |
| .....cgggucgggaguuagcucaagcgggu.....            | 1   | 1 | s05 |
| .....cgggucgggaguuagcucaagcgggu.....            | 3   | 1 | s05 |
| .....cgggucUgaguuagcucaagcgggu.....             | 4   | 1 | s05 |
| .....cgggucgggaguuGgcucaagcgggu.....            | 1   | 1 | s05 |
| .....cgggucCgaguuagcucaagcgggu.....             | 1   | 1 | s05 |
| .....cgggucgggaguuagcGcaagcgggu.....            | 2   | 1 | s05 |
| .....cgggucAagaguuagcucaagcgggu.....            | 1   | 1 | s05 |
| .....Ggggucgggaguuagcucaagcgggu.....            | 1   | 1 | s05 |
| .....cgggucgggaguuagcucCagcgggu.....            | 1   | 1 | s05 |
| .....cgggucAagaguuagcucaagcgggu.....            | 1   | 1 | s05 |
| .....cgggucgggaguuagcucaagcggguGa.....          | 2   | 1 | s05 |
| .....cgggucgggaguuagcucaagcggguA.....           | 25  | 1 | s05 |
| .....cgggucgggaguuagcucaagcggguU.....           | 49  | 1 | s05 |
| .....cgggucgggaguuagcucaagcgggu.....            | 11  | 0 | s05 |
| .....cgggucgggaguuagcucaagcggguG.....           | 2   | 1 | s05 |
| .....cgggucgggaguuagcucaagcggguU.....           | 1   | 1 | s05 |
| .....gUgucgggaguuagcucaag.....                  | 1   | 1 | s05 |
| .....gggucgggaguuagcucaagc.....                 | 1   | 0 | s05 |
| .....Cggucgggaguuagcucaagcgg.....               | 1   | 1 | s05 |
| .....gggucgggagGuaagcucaagcgg.....              | 1   | 1 | s05 |
| .....gggucgggaguuagcucCagcgg.....               | 1   | 1 | s05 |
| .....gggucgggaguuagcucaCgcg.....                | 1   | 1 | s05 |
| .....gggucgggaguuagcucCagcgg.....               | 4   | 1 | s05 |
| .....ggguUggaguuagcucaagcgg.....                | 1   | 1 | s05 |
| .....gUgucgggaguuagcucaagcgg.....               | 1   | 1 | s05 |
| .....gggucgggaguuaglucaagcgg.....               | 1   | 1 | s05 |
| .....gggucgggaguuagcucaCgcg.....                | 1   | 1 | s05 |
| .....gggucgggaguuagcucaagcgg.....               | 56  | 0 | s05 |
| .....gggGcgggaguuagcucaagcgg.....               | 2   | 1 | s05 |
| .....Cggucgggaguuagcucaagcgg.....               | 3   | 1 | s05 |
| .....gggucgggaguuagcucaagcggG.....              | 2   | 1 | s05 |
| .....gggucgggaguuagcucaagcggC.....              | 2   | 1 | s05 |

cuaccgggucggaguuagcucaagcgguuaccuccucaugcggacuucuaucuguccaucucugucgggguuucgagaccgcggggucuuacugaccuuuuug

|                                       |     |   |     |
|---------------------------------------|-----|---|-----|
| .....gggGcggaguuagcucaagcgggu.....    | 8   | 1 | s05 |
| .....gggucggaguuagcucaagcCgu.....     | 1   | 1 | s05 |
| .....gggucggaguuagcucaagGgggu.....    | 1   | 1 | s05 |
| .....Cggucggaguuagcucaagcgggu.....    | 6   | 1 | s05 |
| .....gggucgCaguuagcucaagcgggu.....    | 1   | 1 | s05 |
| .....ggguUggaguuagcucaagcgggu.....    | 1   | 1 | s05 |
| .....gggucggaguuagcucCagcgggu.....    | 7   | 1 | s05 |
| .....gggucggaguuagcucaCgcgggu.....    | 5   | 1 | s05 |
| .....gggucgUaguuagcucaagcgggu.....    | 1   | 1 | s05 |
| .....gggucggCguuagcucaagcgggu.....    | 4   | 1 | s05 |
| .....gggucggaguuagcucaagcgggA.....    | 2   | 1 | s05 |
| .....gggucggUguuagcucaagcgggu.....    | 1   | 1 | s05 |
| .....gggucggaguuagcucaagcgggu.....    | 188 | 0 | s05 |
| .....gggucggaguuagcucaagcUgu.....     | 1   | 1 | s05 |
| .....gggucgAaguuagcucaagcgggu.....    | 1   | 1 | s05 |
| .....gggucggaguuagcucCagcgggu.....    | 6   | 1 | s05 |
| .....gggucggaguuagcucGagcgggu.....    | 1   | 1 | s05 |
| .....gggucggaguuagcucGagcgggu.....    | 1   | 1 | s05 |
| .....gggucggaguuagcucaagcgggu.....    | 74  | 0 | s05 |
| .....gggucggaguuagcucaCgcgggu.....    | 3   | 1 | s05 |
| .....gggucggaguuagcGcaagcgggu.....    | 1   | 1 | s05 |
| .....gggucggaguuagcucaagcggguA.....   | 8   | 1 | s05 |
| .....gggGcggaguuagcucaagcgggu.....    | 1   | 1 | s05 |
| .....gggucggaguuagcucaagcggguC.....   | 3   | 1 | s05 |
| .....gggucggaguuagcucaagcggCu.....    | 1   | 1 | s05 |
| .....Cggucggaguuagcucaagcgggu.....    | 1   | 1 | s05 |
| .....gggucggaguuagcucaagcggGu.....    | 2   | 1 | s05 |
| .....gggCcgaguuagcucaagcgggu.....     | 1   | 1 | s05 |
| .....gggucggaguuagcucaagcggguAa.....  | 2   | 1 | s05 |
| .....gggucggaguuagcucaagcggguua.....  | 10  | 0 | s05 |
| .....gggucggaguuagcucaagcggguuU.....  | 44  | 1 | s05 |
| .....gggucggaguuagcucaagcggguuaU..... | 1   | 1 | s05 |
| .....gggucggaguuagcucaagcggguuac..... | 3   | 0 | s05 |
| .....Cgucggaguuagcucaagcgggu.....     | 1   | 1 | s05 |
| .....uaccuccucaugcgggacu.....         | 2   | 0 | s05 |
| .....uaccuccucaugcgggacu.....         | 1   | 0 | s05 |
| .....uaccuccGcaugcgggacu.....         | 1   | 1 | s05 |
| .....uaccuccucaugcgggacu.....         | 19  | 0 | s05 |
| .....uaccuccucaugcgggacu.....         | 1   | 0 | s05 |
| .....accuccucaugcgggacu.....          | 2   | 0 | s05 |
| .....accuccucaugcgggacu.....          | 1   | 0 | s05 |
| .....ucucugugcgggguuucgagac.....      | 1   | 0 | s05 |
| .....Acgcgggugcuuacugaccuu.....       | 1   | 1 | s05 |
| .....cgcggggucuuacugaccuu.....        | 1   | 0 | s05 |
| .....cgcggggucuuacugacc.....          | 1   | 0 | s05 |
| .....cgcggggucuuacugaccuu.....        | 39  | 0 | s05 |
| .....cgcggggucuuacugaccC.....         | 1   | 1 | s05 |
| .....cgcggggucuuacugaccuu.....        | 1   | 1 | s05 |
| .....cgcggggucuuacugCccuu.....        | 7   | 1 | s05 |
| .....cgcggggucuuacugaccCu.....        | 1   | 1 | s05 |
| .....cgcggggucuuacugacAuu.....        | 1   | 1 | s05 |
| .....cgcggggCgcuuacugaccuu.....       | 5   | 1 | s05 |
| .....cgcggggucuuacuUaccuu.....        | 2   | 1 | s05 |
| .....cgcggggAguuacugaccuu.....        | 1   | 1 | s05 |
| .....cgcggggucuuacugaccAuu.....       | 1   | 1 | s05 |
| .....cgcggggucuuacugaccuu.....        | 3   | 1 | s05 |
| .....cgcggggucGuaacugaccuu.....       | 1   | 1 | s05 |
| .....cgcggggucuuacugaccuu.....        | 296 | 0 | s05 |
| .....cgcggggucuuacugaccGu.....        | 1   | 1 | s05 |
| .....cgcggggGcuuacugaccuu.....        | 9   | 1 | s05 |
| .....cgcgUgucuuacugaccuu.....         | 1   | 1 | s05 |
| .....cgcggggucuuacugaccuu.....        | 1   | 1 | s05 |
| .....cgcggggucuuacugaccuuG.....       | 1   | 1 | s05 |
| .....cgcggggucuuacugaccuuA.....       | 3   | 1 | s05 |
| .....cgcggggUcuuacugaccuu.....        | 1   | 1 | s05 |
| .....cgcggggucuuacugaccCu.....        | 1   | 1 | s05 |
| .....cgcggggucuuacugaccuu.....        | 64  | 0 | s05 |
| .....cUcggggucuuacugaccuu.....        | 1   | 1 | s05 |

cuaccgggucggaguuagcucaagcgguuaccuccuacugcgggacuuucuaucuguccaucucugucgggguuucgagaccgcgggugcuuacugaccuuuuuag

|                                       |     |   |     |
|---------------------------------------|-----|---|-----|
| .....cgcgggugcuuacugaccGuu....        | 1   | 1 | s05 |
| .....cgcgggGgcuuacugaccuuu....        | 2   | 1 | s05 |
| .....cgcgggugcuuacuUaccuuu....        | 1   | 1 | s05 |
| .....cgcgggCgcuuacugaccuuu....        | 1   | 1 | s05 |
| .....cgcgggugcuuacugaccuuC....        | 1   | 1 | s05 |
| .....cgcgggugcuuacugaccuuA....        | 2   | 1 | s05 |
| .....cgUgggugcuuacugaccuuu....        | 1   | 1 | s05 |
| .....cgcgggugcuuacugaccuuu....        | 1   | 0 | s05 |
| .....cgcgggugcuuacugaccuuuAa..        | 1   | 1 | s05 |
| .....gcgggugcuuacugaccuu.....         | 1   | 0 | s05 |
| ..cccgggucggaguuagcucaagc.....        | 1   | 0 | ta2 |
| ...cgggucggaguuagcucaagcg.....        | 2   | 0 | ta2 |
| ...ccgggucggaguuagcucaagcgg.....      | 6   | 0 | ta2 |
| ...cgggucggaguuagcucaagcga.....       | 1   | 1 | ta2 |
| ...ccgggucggaguuagcucaagcggg.....     | 4   | 0 | ta2 |
| ...cgggucggaguuagcucaag.....          | 1   | 0 | ta2 |
| ...cgggucggaguuagcucaagc.....         | 1   | 0 | ta2 |
| ...cgggucggaguuagcucaagcg.....        | 3   | 0 | ta2 |
| ...cgggGcggaguuagcucaagcg.....        | 1   | 1 | ta2 |
| ...cgggucggagGuaagcucaagcgg.....      | 2   | 1 | ta2 |
| ...cgggucggaguuagcucUagcgg.....       | 1   | 1 | ta2 |
| ...cgggucggaguuagcugagcucaagcgg.....  | 1   | 1 | ta2 |
| ...cgggucggaguuagcucaagcga.....       | 2   | 1 | ta2 |
| ...cgggucggGguuagcucaagcgg.....       | 1   | 1 | ta2 |
| ...cgggucggaguuagcucaaUcgg.....       | 2   | 1 | ta2 |
| ...cgggucggaguuagcucaagcUg.....       | 1   | 1 | ta2 |
| ...cgggucggaguuagcucaagcgg.....       | 148 | 0 | ta2 |
| ...cgggGcggaguuagcucaagcgg.....       | 3   | 1 | ta2 |
| ...cgggucggaguuagcucaCgcggu.....      | 1   | 1 | ta2 |
| ...cgggucgUaguuagcucaagcggg.....      | 1   | 1 | ta2 |
| ...cgggucggaguuUcuaagcggg.....        | 1   | 1 | ta2 |
| ...cgggucggaguuagcucaagcUgu.....      | 1   | 1 | ta2 |
| ...cgggucggaguuagcucaagcggg.....      | 114 | 0 | ta2 |
| ...cgggucggaguuagcucaagcggA.....      | 7   | 1 | ta2 |
| ...cgggucggaguuagcucaagcgguu.....     | 18  | 0 | ta2 |
| ...cgggucggaguuagcucaagcggAu.....     | 1   | 1 | ta2 |
| ...cgggucggaguuagcucaagcgggA.....     | 5   | 1 | ta2 |
| ...cgggucggaguuagcucaagcgguuU.....    | 6   | 1 | ta2 |
| ...gggucggaguuagcucaagcgg.....        | 22  | 0 | ta2 |
| ...gggucggaguuagcucaagcggg.....       | 17  | 0 | ta2 |
| ...gggucggaguuagcucUagcgg.....        | 1   | 1 | ta2 |
| ...gggucggaguuUcuaagcgguu.....        | 1   | 1 | ta2 |
| ...gggucggaguuagcucaagcgguu.....      | 9   | 0 | ta2 |
| .....aagcgguuaccuccuacugcggacuuu..... | 1   | 0 | ta2 |
| .....accuccuacugcggacuu.....          | 1   | 0 | ta2 |
| .....accuccuacugcggacuA.....          | 1   | 1 | ta2 |
| .....accuccuacugcggacuuu.....         | 1   | 0 | ta2 |
| .....accuccuacugcggacuuuc.....        | 1   | 0 | ta2 |
| .....cugucugggguucgagac.....          | 1   | 0 | ta2 |
| .....acccgggugcuuacugaccuu.....       | 2   | 0 | ta2 |
| .....cgcgggugcuuacugaccu.....         | 2   | 0 | ta2 |
| .....cgcgggugcuuacugaccuu.....        | 20  | 0 | ta2 |
| .....cgcgggugcuuacugAcuuu.....        | 1   | 1 | ta2 |
| .....cgcgggugcuuacuUaccuuu.....       | 1   | 1 | ta2 |
| .....cgcgggugcuuacugaccuuu.....       | 23  | 0 | ta2 |
| .....cgcgggugcuuacugaccuuu.....       | 1   | 0 | ta2 |
| .....cgcgggugcuuacugaccuuuAa..        | 1   | 1 | ta2 |
| .....cgggucggaguuAcucaagc.....        | 1   | 1 | j24 |
| .....cgggucggaguuagcucaagA.....       | 1   | 1 | j24 |
| ...cgCgucggaguuagcucaagcg.....        | 1   | 1 | j24 |
| ...cgggucggaguuagcucaagcg.....        | 3   | 0 | j24 |
| ...cgggucggagAuagcucaagcgg.....       | 1   | 1 | j24 |
| ...cgggucggaguuagcucaagcgg.....       | 70  | 0 | j24 |
| ...cgggucggagGuaagcucaagcgg.....      | 1   | 1 | j24 |
| ...cgggucggaguuagcucaaUcgg.....       | 1   | 1 | j24 |
| ...cgggucCgaguuagcucaagcgg.....       | 1   | 1 | j24 |
| ...cgggucggaguuagcucaagcga.....       | 10  | 1 | j24 |

cuaccgggucggaguuagcucaagcgguuaccuccuacugcggacuuucuaucuguccaucucugucgggguuucgagaccgcgggugcuuacugaccuuuuuag

|                                      |    |   |     |
|--------------------------------------|----|---|-----|
| .....cgggCcgaguuagcucaagcgg.....     | 1  | 1 | j24 |
| .....cgggGcggaguuagcucaagcgg.....    | 2  | 1 | j24 |
| .....cgggGcggaguuagcucaagcgg.....    | 3  | 1 | j24 |
| .....cgggucggaguuagcucaagcAgu.....   | 2  | 1 | j24 |
| .....cgggucggagGuaagcucaagcgg.....   | 3  | 1 | j24 |
| .....cggCucggaguuagcucaagcgg.....    | 1  | 1 | j24 |
| .....cgggucggaguuagcucaagcggA.....   | 3  | 1 | j24 |
| .....cgggucggaguuagcucaagcgg.....    | 36 | 0 | j24 |
| .....cgggCcgaguuagcucaagcgg.....     | 1  | 1 | j24 |
| .....cgggucggaguuagcucaCgcgg.....    | 1  | 1 | j24 |
| .....cgggucggaguuagcucaagcgguu.....  | 2  | 0 | j24 |
| .....cggUucggaguuagcucaagcgg.....    | 1  | 1 | j24 |
| .....cgggCcgaguuagcucaagcgg.....     | 1  | 1 | j24 |
| .....cgggucggaguuagcucaagcgguuU..... | 2  | 1 | j24 |
| .....cgggucggaguuagcucaagcgguuA..... | 5  | 1 | j24 |
| .....gggucggaguuagcucaagcgg.....     | 7  | 0 | j24 |
| .....gggucggaguuagcCcaagcgg.....     | 1  | 1 | j24 |
| .....gggucggaguuagcucaagcggA.....    | 1  | 1 | j24 |
| .....gggucggaguuagcucaagcgg.....     | 3  | 0 | j24 |
| .....gggucggaguuagcucaagcgguu.....   | 3  | 0 | j24 |
| .....gggucggaguuagcucaagcgguuU.....  | 2  | 1 | j24 |
| .....cgcgggugcuuacugaccuu.....       | 4  | 0 | j24 |
| .....cgcgggGcguuacugaccuu.....       | 1  | 1 | j24 |
| .....cgcgggugcuuacugacUcuu.....      | 1  | 1 | j24 |
| .....cgcgggugcuuacugaccuuA.....      | 3  | 1 | j24 |
| .....cgcgggugcuCacugaccuu.....       | 1  | 1 | j24 |
| .....cgcgggugcuuacugaccuu.....       | 1  | 1 | j24 |
| .....cgcgggugcuuacugaccG.....        | 1  | 1 | j24 |
| .....cgcgggugcuuacugaccuu.....       | 41 | 0 | j24 |
| .....cgcgggGcguuacugaccuu.....       | 1  | 1 | j24 |
| .....cgcgggGgcuuacugaccuu.....       | 1  | 1 | j24 |
| .....cgcgggugcuuacugaccuu.....       | 7  | 0 | j24 |
| .....ccgggucggaguuagcucaagcgg.....   | 1  | 0 | k11 |
| .....cgggucggaguuagcucaagcgg.....    | 13 | 0 | k11 |
| .....cgggucggagGuaagcucaagcgg.....   | 1  | 1 | k11 |
| .....cgggucggaguuagcucaagcgg.....    | 3  | 0 | k11 |
| .....cgggucggaguuagcucaagcggG.....   | 1  | 1 | k11 |
| .....cgggucggaguuagcucaagcgguu.....  | 5  | 0 | k11 |
| .....cgggucggaguuagcucaagcggA.....   | 1  | 1 | k11 |
| .....gggucggaguuagcucaagcgg.....     | 1  | 0 | k11 |
| .....gggucggaguuagcucaagcgg.....     | 4  | 0 | k11 |
| .....ugugcgggguuucgagac.....         | 1  | 0 | k11 |
| .....cgcgggugcuuacugaccuu.....       | 6  | 0 | k11 |
| .....cgcgggugcuuacugaccuu.....       | 3  | 0 | k11 |
| .....cgcgggugcuuacuUaccuu.....       | 1  | 1 | k11 |
| .....accgggucggaguuagc.....          | 1  | 0 | ta1 |
| .....ccgggucggaguuagcucaagcgg.....   | 2  | 0 | ta1 |
| .....cgggucggaguuagcucaag.....       | 1  | 0 | ta1 |
| .....cgggucggaguuagGuaag.....        | 1  | 1 | ta1 |
| .....cgggucggaguuagcucaagc.....      | 4  | 0 | ta1 |
| .....cgggucggaguuagcucaagc.....      | 3  | 0 | ta1 |
| .....cgggucggaguuagcucaagcgg.....    | 45 | 0 | ta1 |
| .....cgggucggaguuagUucaagcgg.....    | 1  | 1 | ta1 |
| .....cgggGcggaguuagcucaagcgg.....    | 1  | 1 | ta1 |
| .....cgggucggaguuagcucaGgcgg.....    | 1  | 1 | ta1 |
| .....cgggucggaguuagcucaUgcgg.....    | 1  | 1 | ta1 |
| .....cgggucggaguuagcucaagcgg.....    | 18 | 0 | ta1 |
| .....cgggucggaguuagcucaagcgguu.....  | 1  | 0 | ta1 |
| .....cgggucggaguuagcucaagcgguuA..... | 1  | 1 | ta1 |
| .....gggucggaguuagcucaa.....         | 1  | 0 | ta1 |
| .....gggucggaguuagcucaagcgg.....     | 1  | 0 | ta1 |
| .....gggucggaguuagcucaagcggA.....    | 1  | 1 | ta1 |
| .....aagcgguuaccuccuacugcggacu.....  | 1  | 0 | ta1 |
| .....agcgguuaccuccuacugcgg.....      | 1  | 0 | ta1 |
| .....accuccuacugcggacu.....          | 1  | 0 | ta1 |
| .....cugugcgggguuucgaga.....         | 1  | 0 | ta1 |
| .....cgcgggugcuuacugacc.....         | 1  | 0 | ta1 |





cuaccgggucggaguuagcucaagcgguuaccuccuacugcggacuucuaucuguccaucucugucgggguuucgagaccgcgggugcuuacugaccuuuuuag

|                                        |    |   |     |
|----------------------------------------|----|---|-----|
| .....gagaccgcgggugcuuacuga.....        | 1  | 0 | NL2 |
| .....cgcgggugcuuacugacAc.....          | 1  | 1 | NL2 |
| .....cgcgggugcuuacugaccuu.....         | 1  | 0 | NL2 |
| .....cgcgggugcuuacugaccuu.....         | 3  | 0 | NL2 |
| .....gcgggugcuuacugaccuuuu.....        | 1  | 0 | NL2 |
| .....cgggucggaguuagcucaagcggg.....     | 1  | 0 | j13 |
| .....ccgggucggaguuagcucaagcggg.....    | 2  | 0 | k10 |
| .....cgggucggaguuagcucaagcgg.....      | 2  | 0 | k10 |
| .....cgggucggaguuagcucaagcggg.....     | 14 | 0 | k10 |
| .....cgggucggaguuagcucaagcggg.....     | 35 | 0 | k10 |
| .....cgggGcggaguuagcucaagcggg.....     | 1  | 1 | k10 |
| .....cgggucggaguuagcucaagcggG.....     | 2  | 1 | k10 |
| .....cgggCcgaguuagcucaagcggg.....      | 1  | 1 | k10 |
| .....cgggucggaguuagcucaagcggA.....     | 2  | 1 | k10 |
| .....cgggucggaguuagcucaagcgggA.....    | 4  | 1 | k10 |
| .....cgggucggaguuagcucaagcgggu.....    | 8  | 0 | k10 |
| .....cgggucggaguuagcucaagcggGu.....    | 1  | 1 | k10 |
| .....cgggucggaguuagcucaCgcggu.....     | 1  | 1 | k10 |
| .....cgggucggaguuagcucaagcgggA.....    | 2  | 1 | k10 |
| .....gggucggaguuagcucaagcggg.....      | 3  | 0 | k10 |
| .....gggucggaguuagcucaagcggG.....      | 3  | 1 | k10 |
| .....gggucggaguuagcucaagcggA.....      | 2  | 1 | k10 |
| .....gggucggaguuagcucaagcggC.....      | 1  | 1 | k10 |
| .....gggucggaguuagcucaagcggg.....      | 21 | 0 | k10 |
| .....gggucggaguuagcucaagcggA.....      | 4  | 1 | k10 |
| .....gggGcggaguuagcucaagcgggu.....     | 1  | 1 | k10 |
| .....gggucggaguuagcucaagcggGu.....     | 1  | 1 | k10 |
| .....gggucggaguuagcucCagcgggu.....     | 1  | 1 | k10 |
| .....gggucggaguuagcucaagcgggu.....     | 49 | 0 | k10 |
| .....gggucggaguuagcucaagcgggA.....     | 2  | 1 | k10 |
| .....gggucggaguuagcucaagcgggA.....     | 1  | 1 | k10 |
| .....ggaguuagcucaagcggg.....           | 1  | 0 | k10 |
| .....ggaguuagcucaagcgggA.....          | 1  | 1 | k10 |
| .....cgguuaccuccuacugcggacuu.....      | 1  | 0 | k10 |
| .....ccaucucugucgggguuucga.....        | 1  | 0 | k10 |
| .....cgcgggugcuuacugaccuu.....         | 1  | 0 | k10 |
| .....cgcgggAgcuuacugaccuu.....         | 1  | 1 | k10 |
| .....cgcgggugcuuacugaccuu.....         | 10 | 0 | k10 |
| .....cgcgggugcuuacugaccuuuu.....       | 9  | 0 | k10 |
| .....cgcgggugcGuacugaccuuuu.....       | 1  | 1 | k10 |
| .....gcgggugcuuacugaccuu.....          | 1  | 0 | k10 |
| .....accgggucggaguuagcu.....           | 1  | 0 | j19 |
| .....aUcgggucggaguuagcucaag.....       | 1  | 1 | j19 |
| .....accggCucggaguuagcucaag.....       | 1  | 1 | j19 |
| .....accgggucggaguuagcucaagc.....      | 1  | 0 | j19 |
| .....accgggucggaguuagcucaagcA.....     | 1  | 1 | j19 |
| .....accgggucggaguuagcucaagcgg.....    | 1  | 0 | j19 |
| .....accgggucggaguuacCucaagcgg.....    | 1  | 1 | j19 |
| .....accgggucggagGuaagcucaagcgg.....   | 1  | 1 | j19 |
| .....accgggucggaguuagcucaagcggg.....   | 1  | 0 | j19 |
| .....accUgggucggaguuagcucaagcgggu..... | 1  | 1 | j19 |
| .....ccgggucggaguuagcucaa.....         | 1  | 0 | j19 |
| .....ccgggucggaguuagcucaag.....        | 1  | 0 | j19 |
| .....Accgggucggaguuagcucaagc.....      | 2  | 1 | j19 |
| .....Accgggucggaguuagcucaagcgg.....    | 2  | 1 | j19 |
| .....ccgggucggaguuagcucaagcgg.....     | 2  | 0 | j19 |
| .....ccgggucggaguuagcucaagcA.....      | 1  | 1 | j19 |
| .....cccgUgucggaguuagcucaagcggg.....   | 1  | 1 | j19 |
| .....ccgggucggaguuagcucaagcggg.....    | 7  | 0 | j19 |
| .....ccgggucggaguuagcucaagcggG.....    | 1  | 1 | j19 |
| .....ccgggucggaguuagcucaagcggg.....    | 10 | 0 | j19 |
| .....Accgggucggaguuagcucaagcggg.....   | 4  | 1 | j19 |
| .....ccgggGcggaguuagcucaagcggg.....    | 1  | 1 | j19 |
| .....Accgggucggaguuagcucaagcgggu.....  | 3  | 1 | j19 |
| .....ccggguAaggaguuagcucaag.....       | 1  | 1 | j19 |

cuaccgggucgggaguuagcucaagcgguuaccuccuacugcggacuuucuaucuguccaucucugucgggguuucgagaccgcgggugcuuacugaccuuuuuag

|                                   |     |   |     |
|-----------------------------------|-----|---|-----|
| ...ccgggucgggaguuagcucaag...      | 7   | 0 | j19 |
| ...ccgggucgggaguuagcucaagA...     | 1   | 1 | j19 |
| ...ccgggucgggaguuagUucaagc...     | 1   | 1 | j19 |
| ...ccgggucgggCguuagcucaagc...     | 1   | 1 | j19 |
| ...ccgggucgggaguuagcucaagc...     | 7   | 0 | j19 |
| ...Gcgggucgggaguuagcucaagc...     | 1   | 1 | j19 |
| ...ccgggucgggaguuagcucaagcgg...   | 19  | 0 | j19 |
| ...ccgggucgggaguuagUucaagcgg...   | 2   | 1 | j19 |
| ...ccCggucgggaguuagcucaagcgg...   | 1   | 1 | j19 |
| ...ccgggucgggaguuagcucCagcgg...   | 1   | 1 | j19 |
| ...cGgggucgggaguuagcucaagcgg...   | 1   | 1 | j19 |
| ...ccgggucgggaguuagcucaagcggA...  | 3   | 1 | j19 |
| ...ccgggucgggCguuagcucaagcgg...   | 2   | 1 | j19 |
| ...ccgggGcgggaguuagcucaagcgg...   | 2   | 1 | j19 |
| ...ccCggucgggaguuagcucaagcgg...   | 1   | 1 | j19 |
| ...ccgggucgggaguuagcucaagcgg...   | 108 | 0 | j19 |
| ...ccgggucgggagUuagcucaagcgg...   | 1   | 1 | j19 |
| ...ccgggucgggaguuagcucCagcgg...   | 2   | 1 | j19 |
| ...ccgggucAgaguuagcucaagcgg...    | 1   | 1 | j19 |
| ...ccgggucgggaguuagcCcaagcgg...   | 1   | 1 | j19 |
| ...ccgggucgggaguuagUucaagcgg...   | 1   | 1 | j19 |
| ...Ucgggucgggaguuagcucaagcgg...   | 6   | 1 | j19 |
| ...ccgggucgggaguuagcucaCgcgg...   | 1   | 1 | j19 |
| ...ccgggCcgaguuagcucaagcgg...     | 4   | 1 | j19 |
| ...ccgggucgggagCuagcucaagcgg...   | 3   | 1 | j19 |
| ...ccgggucgggaguuagcucaagcggU...  | 3   | 1 | j19 |
| ...ccgggucgggaguuagcucaagcggC...  | 1   | 1 | j19 |
| ...cGgggucgggaguuagcucaagcgg...   | 3   | 1 | j19 |
| ...ccgggucgggCguuagcucaagcgg...   | 1   | 1 | j19 |
| ...ccgggucgggagUuagcucaagcgg...   | 1   | 1 | j19 |
| ...ccgggucgggaguuagcucaagcggA...  | 8   | 1 | j19 |
| ...ccgggucgggaguuagcucaagcgg...   | 65  | 0 | j19 |
| ...Acgggucgggaguuagcucaagcgg...   | 3   | 1 | j19 |
| ...ccgggucgggaguuagcucaagcggG...  | 2   | 1 | j19 |
| ...ccgggucgggaguuagcuGaaagcgg...  | 1   | 1 | j19 |
| ...ccgggGcgggaguuagcucaagcgg...   | 1   | 1 | j19 |
| ...ccgggucgggaguuagUucaagcgg...   | 1   | 1 | j19 |
| ...ccgggucgggagCuagcucaagcgg...   | 1   | 1 | j19 |
| ...Ucgggucgggaguuagcucaagcgg...   | 2   | 1 | j19 |
| ...ccgggucgggaguuagcucaagcgguu... | 15  | 0 | j19 |
| ...ccgggUAggaguuagcucaagcgg...    | 1   | 1 | j19 |
| ...ccgggucgggaguuagcucaagcggG...  | 1   | 1 | j19 |
| ...ccgggucgggaguuagcucaagcggA...  | 5   | 1 | j19 |
| ...Acgggucgggaguuagcucaagcgg...   | 1   | 1 | j19 |
| ...ccgggucgggaguuagcucaagcggA...  | 4   | 1 | j19 |
| ...ccgggucgggaguuagcucaagcggU...  | 1   | 1 | j19 |
| ...cgggucgggaguuagcuca...         | 2   | 0 | j19 |
| ...cgggucgggaguuagcucaa...        | 4   | 0 | j19 |
| ...cgggucgggaguuagcuAaag...       | 1   | 1 | j19 |
| ...cgggucgggagUuagcucaag...       | 2   | 1 | j19 |
| ...cgggucggaCuuaagcucaag...       | 1   | 1 | j19 |
| ...cgggucgggaguuagcucCag...       | 1   | 1 | j19 |
| ...Ugggucgggaguuagcucaag...       | 1   | 1 | j19 |
| ...cgggucgggaguuagUucaag...       | 1   | 1 | j19 |
| ...cgggucgggaguuagcucaCg...       | 1   | 1 | j19 |
| ...cgggucgggaguuagcucaag...       | 42  | 0 | j19 |
| ...cgggCcgaguuagcucaag...         | 1   | 1 | j19 |
| ...cgggGcggaguuagcucaag...        | 1   | 1 | j19 |
| ...cgggAcgggaguuagcucaag...       | 2   | 1 | j19 |
| ...cgggucgCaguuagcucaagc...       | 1   | 1 | j19 |
| ...cgggucgggaguuagcucaagA...      | 12  | 1 | j19 |
| ...cgggucgggaguuagcucCagc...      | 1   | 1 | j19 |
| ...cgggucgUaguuagcucaagc...       | 1   | 1 | j19 |
| ...cgggGcgggaguuagcucaagc...      | 1   | 1 | j19 |
| ...Ggggucgggaguuagcucaagc...      | 1   | 1 | j19 |
| ...cgggucgggaguuagcucaagc...      | 51  | 0 | j19 |
| ...cgggucgggaguuagcucaagU...      | 5   | 1 | j19 |
| ...cgggucgggagUuagcucaagc...      | 11  | 1 | j19 |

cuaccgggucgggaguuagcucaagcgguuuaccuccuacugcgggacuuucuaucuguccaucucugugcgggguuucgagaccgcggggugcuuacugaccuuuuuag

|                                     |     |   |     |
|-------------------------------------|-----|---|-----|
| .....cgggucggCguuagcucaagcgg.....   | 6   | 1 | j19 |
| .....cgggucgggaguuagcucaagcA.....   | 18  | 1 | j19 |
| .....cgAgucgggaguuagcucaagcgg.....  | 1   | 1 | j19 |
| .....Ugggucgggaguuagcucaagcgg.....  | 5   | 1 | j19 |
| .....cCggucgggaguuagcucaagcgg.....  | 2   | 1 | j19 |
| .....cgggucgggaguuagcuUaagcgg.....  | 1   | 1 | j19 |
| .....cgggCcgggaguuagcucaagcgg.....  | 6   | 1 | j19 |
| .....cgggAcgggaguuagcucaagcgg.....  | 5   | 1 | j19 |
| .....cgggucCgaguuagcucaagcgg.....   | 1   | 1 | j19 |
| .....cgggucgggaguuagcucaCgcg.....   | 5   | 1 | j19 |
| .....cgggucgggaguuagGuaagcgg.....   | 2   | 1 | j19 |
| .....cggguAaggaguuagcucaagcgg.....  | 3   | 1 | j19 |
| .....cgggucgggaguuagcucaagcgg.....  | 408 | 0 | j19 |
| .....cgggucgggaguuCgcucaagcgg.....  | 2   | 1 | j19 |
| .....cgggucgggaguuagcucaagcU.....   | 2   | 1 | j19 |
| .....cgggucgggaguuagcuGaagcgg.....  | 1   | 1 | j19 |
| .....cgggucgggaguuagcuAaagcgg.....  | 5   | 1 | j19 |
| .....cgggGcgggaguuagcucaagcgg.....  | 34  | 1 | j19 |
| .....cgggucgggagUGagcucaagcgg.....  | 1   | 1 | j19 |
| .....cgggucgggaguuagcucaaUcgg.....  | 2   | 1 | j19 |
| .....cgggucgggaguuagGlucaagcgg..... | 4   | 1 | j19 |
| .....cggCucgggaguuagcucaagcgg.....  | 1   | 1 | j19 |
| .....cgggucgggAuuagcucaagcgg.....   | 1   | 1 | j19 |
| .....cgggucgCaguuagcucaagcgg.....   | 1   | 1 | j19 |
| .....cgggucgggaguuagcucaagAg.....   | 1   | 1 | j19 |
| .....cgggucgggaguuagUucaagcgg.....  | 2   | 1 | j19 |
| .....cUggucgggaguuagcucaagcgg.....  | 1   | 1 | j19 |
| .....cgggucgggagCuagcucaagcgg.....  | 2   | 1 | j19 |
| .....cgggucgggaguuagcucaGgcgg.....  | 4   | 1 | j19 |
| .....Ugggucgggaguuagcucaagcgg.....  | 24  | 1 | j19 |
| .....cgggucgggaguuUcucaagcgg.....   | 6   | 1 | j19 |
| .....cgggucgggaguuagUucaagcgg.....  | 12  | 1 | j19 |
| .....cgggucgggaguuagcucaagcUg.....  | 4   | 1 | j19 |
| .....cgAgucgggaguuagcucaagcgg.....  | 8   | 1 | j19 |
| .....cgggucgggaguuagcucaagcggA..... | 115 | 1 | j19 |
| .....cgggucgggaguuagcucaagcCg.....  | 1   | 1 | j19 |
| .....cgggucgAaguuagcucaagcgg.....   | 3   | 1 | j19 |
| .....Agggucgggaguuagcucaagcgg.....  | 14  | 1 | j19 |
| .....cgggucAagaguuagcucaagcgg.....  | 3   | 1 | j19 |
| .....cgCgucgggaguuagcucaagcgg.....  | 10  | 1 | j19 |
| .....cgggucgggaguuagcucaagcAg.....  | 3   | 1 | j19 |
| .....cgggucgggGuuagcucaagcgg.....   | 2   | 1 | j19 |
| .....cgggucgggagUcagcucaagcgg.....  | 7   | 1 | j19 |
| .....cgggucgggaguuacCucaagcgg.....  | 5   | 1 | j19 |
| .....cgggucgggaguuagcucaagcgg.....  | 81  | 1 | j19 |
| .....cgggAcgggaguuagcucaagcgg.....  | 23  | 1 | j19 |
| .....cggUucgggaguuagcucaagcgg.....  | 4   | 1 | j19 |
| .....cgggGcgggaguuagcucaagcgg.....  | 288 | 1 | j19 |
| .....cgggucgggaguuagcucaCgcg.....   | 43  | 1 | j19 |
| .....cgggucgggaguuagcuGaagcgg.....  | 6   | 1 | j19 |
| .....cgggucCgaguuagcucaagcgg.....   | 7   | 1 | j19 |
| .....cgggucgggaguuagcucaagcggU..... | 42  | 1 | j19 |
| .....cggguAaggaguuagcucaagcgg.....  | 18  | 1 | j19 |
| .....cggguUgggaguuagcucaagcgg.....  | 10  | 1 | j19 |
| .....cgggucgggaguuAacucaagcgg.....  | 1   | 1 | j19 |
| .....cgggucgggAuuagcucaagcgg.....   | 3   | 1 | j19 |
| .....cgggucgggUuuagcucaagcgg.....   | 2   | 1 | j19 |
| .....cUggucgggaguuagcucaagcgg.....  | 4   | 1 | j19 |
| .....cgggucgggaguuagcuAaagcgg.....  | 36  | 1 | j19 |
| .....cgggucgggagLuagcucaagcgg.....  | 6   | 1 | j19 |
| .....cgggucgggAuuagcucaagcgg.....   | 4   | 1 | j19 |
| .....cgggucgggaguuagcucaaAcgg.....  | 2   | 1 | j19 |
| .....cgggucgggaguuagGuaagcgg.....   | 15  | 1 | j19 |
| .....cCggucgggaguuagcucaagcgg.....  | 9   | 1 | j19 |
| .....cgggucgggaguuagcuUagcgg.....   | 3   | 1 | j19 |
| .....cgggucgggaguuagcuUaagcgg.....  | 4   | 1 | j19 |
| .....cgggucgggaguuagcucaagcggC..... | 6   | 1 | j19 |
| .....cgggucgggaguuagcUcaagcgg.....  | 8   | 1 | j19 |
| .....cggguGgggaguuagcucaagcgg.....  | 7   | 1 | j19 |

cuaccgggucgggaguuagcucaagcgguuaccuccuacugcgggacuuucuaucuguccaucucugugcgggguuucgagaccgcggggugcuuacugaccuuuuuag

|                                       |      |   |     |
|---------------------------------------|------|---|-----|
| .....cAggucgggaguuagcucaagcgg.....    | 1    | 1 | j19 |
| .....cgggucgggaguuagcucGagcgg.....    | 2    | 1 | j19 |
| .....cgggucgggagCuagcucaagcgg.....    | 24   | 1 | j19 |
| .....cgggucgggaguuagcucaagcgg.....    | 5483 | 0 | j19 |
| .....cgggucgggaguuagcucaagAgg.....    | 6    | 1 | j19 |
| .....cgggucgggACuuagcucaagcgg.....    | 6    | 1 | j19 |
| .....cgggucgggaguuagcucaUgcgg.....    | 2    | 1 | j19 |
| .....cggCucgggaguuagcucaagcgg.....    | 1    | 1 | j19 |
| .....cgggucgggaguuagcCcaagcgg.....    | 8    | 1 | j19 |
| .....cgggucgUaguuagcucaagcgg.....     | 5    | 1 | j19 |
| .....Ggggucgggaguuagcucaagcgg.....    | 25   | 1 | j19 |
| .....cgggucgggaguuagAucaagcgg.....    | 25   | 1 | j19 |
| .....cgggucgCaguuagcucaagcgg.....     | 4    | 1 | j19 |
| .....cgggucgggaguuagcucaaUcgg.....    | 17   | 1 | j19 |
| .....cgggucgggagCuagcucaagcgg.....    | 98   | 1 | j19 |
| .....cgggCcgaggaguuagcucaagcgg.....   | 47   | 1 | j19 |
| .....cgggucgggaguuagcucaaCcg.....     | 3    | 1 | j19 |
| .....cgggucgggaguuagcucaagUgg.....    | 2    | 1 | j19 |
| .....cggAuaggaguuagcucaagcgg.....     | 1    | 1 | j19 |
| .....cgggucgggagUgagcucaagcgg.....    | 8    | 1 | j19 |
| .....cgggucgggCguuuagcucaagcgg.....   | 35   | 1 | j19 |
| .....cgggucgggaguuCgcucaagcgg.....    | 8    | 1 | j19 |
| .....cgggucgggCguuuagcucaagcgg.....   | 30   | 1 | j19 |
| .....cgggucgggaguuagcucaagcUgu.....   | 4    | 1 | j19 |
| .....cgggucgggACuuagcucaagcgg.....    | 9    | 1 | j19 |
| .....cgggucgggAguuagcucaagcgg.....    | 7    | 1 | j19 |
| .....cgggAuaggaguuagcucaagcgg.....    | 12   | 1 | j19 |
| .....cgggCcgaggaguuagcucaagcgg.....   | 385  | 1 | j19 |
| .....cgggucUgaguuagcucaagcgg.....     | 1    | 1 | j19 |
| .....cgggCcgaggaguuagcucaagcgg.....   | 52   | 1 | j19 |
| .....cgggucgggaguuagcuUaagcgg.....    | 7    | 1 | j19 |
| .....cgggucgggaguuagcucaCgagg.....    | 66   | 1 | j19 |
| .....cgggucgggAUuuagcucaagcgg.....    | 5    | 1 | j19 |
| .....cgggucgggaguuagcGcaagcgg.....    | 8    | 1 | j19 |
| .....cgCgucgggaguuagcucaagcgg.....    | 10   | 1 | j19 |
| .....cgggucgggaguuagcucaagGgg.....    | 2    | 1 | j19 |
| .....cgggAuaggaguuagcucaagcgg.....    | 44   | 1 | j19 |
| .....cgggucgggagUgagcucaagcgg.....    | 13   | 1 | j19 |
| .....cggguUggaguuagcucaagcgg.....     | 13   | 1 | j19 |
| .....cggCucgggaguuagcucaagcgg.....    | 1    | 1 | j19 |
| .....cgggucgggaguuAUcucaagcgg.....    | 7    | 1 | j19 |
| .....cgggucgggagCuagcucaagcgg.....    | 27   | 1 | j19 |
| .....cUggucgggaguuagcucaagcgg.....    | 3    | 1 | j19 |
| .....cgggucgggaguuagcucaagcGlu.....   | 3    | 1 | j19 |
| .....cgggucgCaguuagcucaagcgg.....     | 5    | 1 | j19 |
| .....cgggucAuaggaguuagcucaagcgg.....  | 1    | 1 | j19 |
| .....cgggucgggaguuagcuUaagcgg.....    | 36   | 1 | j19 |
| .....cCggucgggaguuagcucaagcgg.....    | 17   | 1 | j19 |
| .....cgggucgggUguuuagcucaagcgg.....   | 1    | 1 | j19 |
| .....cgggucgggaguuagcucaagcggG.....   | 64   | 1 | j19 |
| .....cgggucgggaguuUgcuaagcgg.....     | 1    | 1 | j19 |
| .....cggguGggaguuagcucaagcgg.....     | 11   | 1 | j19 |
| .....cgggucgggaguuagcucCagcgg.....    | 77   | 1 | j19 |
| .....cgggucgggaguuagcuGaagcgg.....    | 9    | 1 | j19 |
| .....cgggucgggaguuagcucaaCcg.....     | 4    | 1 | j19 |
| .....cgggucgggaguuagUucaagcgg.....    | 10   | 1 | j19 |
| .....cgggucgggaguuagcucaagcgg.....    | 6566 | 0 | j19 |
| .....cAggucgggaguuagcucaagcgg.....    | 2    | 1 | j19 |
| .....cgggucgggaguuagcucaagcGcu.....   | 1    | 1 | j19 |
| .....cgggucgggaguuagGducaagcgg.....   | 21   | 1 | j19 |
| .....cgggucgAuaggaguuagcucaagcgg..... | 3    | 1 | j19 |
| .....cgggucgggaguuagcCcaagcgg.....    | 11   | 1 | j19 |
| .....cggAuaggaguuagcucaagcgg.....     | 1    | 1 | j19 |
| .....cgggucCgaguuagcucaagcgg.....     | 6    | 1 | j19 |
| .....cgggucgggaguuagcucaagAggu.....   | 8    | 1 | j19 |
| .....cgggucgggaguuagcucaagcggC.....   | 116  | 1 | j19 |
| .....cgggucgggaguuagcucaaAacgg.....   | 1    | 1 | j19 |
| .....cgggucgggaguuagcucaagcGU.....    | 10   | 1 | j19 |
| .....cgggucgggaguuagcAcaagcgg.....    | 1    | 1 | j19 |

cuaccgggucgggaguuagcucaagcgguuaccuccuacugcgggacuuucuaucuguccaucucugugcgggguuucgagaccgcgggugcuuacugaccuuuuuag

|                                        |      |   |     |
|----------------------------------------|------|---|-----|
| .....Agggucgggaguuagcucaagcgggu.....   | 16   | 1 | j19 |
| .....cgggucgggagGuaagcucaagcgggu.....  | 140  | 1 | j19 |
| .....cgggucgggaguCagcucaagcgggu.....   | 8    | 1 | j19 |
| .....cggUucgggaguuagcucaagcgggu.....   | 7    | 1 | j19 |
| .....cgggucgggaguuagcucaaaUcgggu.....  | 16   | 1 | j19 |
| .....cgAgucgggaguuagcucaagcgggu.....   | 5    | 1 | j19 |
| .....cgggucgggaguuagcucaagcggA.....    | 381  | 1 | j19 |
| .....cgggucgUaguuagcucaagcgggu.....    | 11   | 1 | j19 |
| .....cgggucggGguuagcucaagcgggu.....    | 5    | 1 | j19 |
| .....cgggucgggaguuCgcucaagcgggu.....   | 9    | 1 | j19 |
| .....cgggucgggaguuagcucaagUgggu.....   | 4    | 1 | j19 |
| .....cgUgucgggaguuagcucaagcgggu.....   | 2    | 1 | j19 |
| .....cgggucgggaguuagcucaagcCgu.....    | 6    | 1 | j19 |
| .....cgggucgggaguuagcucaUgucgggu.....  | 2    | 1 | j19 |
| .....cgggucgggaguuagcucUagcgggu.....   | 2    | 1 | j19 |
| .....cgggucgggaguuAgcucaagcgggu.....   | 2    | 1 | j19 |
| .....Ugggucgggaguuagcucaagcgggu.....   | 35   | 1 | j19 |
| .....cgggucgggaguuagAuaagcgggu.....    | 19   | 1 | j19 |
| .....cgggucgggaguuuCcucaagcgggu.....   | 1    | 1 | j19 |
| .....Ggggucgggaguuagcucaagcgggu.....   | 62   | 1 | j19 |
| .....cggguUgggaguuagcucaagcgggu.....   | 1    | 1 | j19 |
| .....cgggucggGguuagcucaagcgggu.....    | 3    | 1 | j19 |
| .....cggguGgggaguuagcucaagcgggu.....   | 2    | 1 | j19 |
| .....cgggucgggaguuagcucaagcgggu.....   | 1079 | 0 | j19 |
| .....Agggucgggaguuagcucaagcgggu.....   | 3    | 1 | j19 |
| .....cgggucgggaguuagcucaagcggCu.....   | 9    | 1 | j19 |
| .....cgggucggGguuagcucaagcgggu.....    | 2    | 1 | j19 |
| .....cCggucgggaguuagcucaagcgggu.....   | 3    | 1 | j19 |
| .....cgggucCgaguuagcucaagcgggu.....    | 1    | 1 | j19 |
| .....Ugggucgggaguuagcucaagcgggu.....   | 4    | 1 | j19 |
| .....cgggucgggaguuUcucaagcgggu.....    | 1    | 1 | j19 |
| .....cgggucgggaguuagcucaagcggA.....    | 518  | 1 | j19 |
| .....cgggucgggaguuagcuAaagcgggu.....   | 8    | 1 | j19 |
| .....cgggucgggagGuaagcucaagcgggu.....  | 15   | 1 | j19 |
| .....cgggCcgaguuagcucaagcgggu.....     | 10   | 1 | j19 |
| .....Ggggucgggaguuagcucaagcgggu.....   | 21   | 1 | j19 |
| .....cgggucgggaguuagcucaagUgggu.....   | 1    | 1 | j19 |
| .....cgggucgggaguuagcucCagcgggu.....   | 12   | 1 | j19 |
| .....cgggucgggAuuagcucaagcgggu.....    | 1    | 1 | j19 |
| .....cggCucgggaguuagcucaagcgggu.....   | 2    | 1 | j19 |
| .....cgCgucgggaguuagcucaagcgggu.....   | 2    | 1 | j19 |
| .....cgggucgggaguuagcCcaagcgggu.....   | 1    | 1 | j19 |
| .....cgggucgggaguuagcGcaagcgggu.....   | 1    | 1 | j19 |
| .....cgggucgggaguuagcucaagcggG.....    | 14   | 1 | j19 |
| .....cgggucgggaguuagAuaagcgggu.....    | 5    | 1 | j19 |
| .....cgggucgggaguuUgcucaagcgggu.....   | 1    | 1 | j19 |
| .....cgggucgCaguuagcucaagcgggu.....    | 1    | 1 | j19 |
| .....cgggucgggaguuagcucaagcggA.....    | 13   | 1 | j19 |
| .....cgAgucgggaguuagcucaagcgggu.....   | 1    | 1 | j19 |
| .....cgggucgggaguuagcucaagcgguC.....   | 5    | 1 | j19 |
| .....cgggucgggaguuagcucaCgucgggu.....  | 12   | 1 | j19 |
| .....cgggucgggaguuagcucaaCggu.....     | 2    | 1 | j19 |
| .....cgggAcgggaguuagcucaagcgggu.....   | 8    | 1 | j19 |
| .....cgggucgggaguuCgcucaagcgggu.....   | 1    | 1 | j19 |
| .....cgggucgggaguuagGuaagcgggu.....    | 3    | 1 | j19 |
| .....cgggucgggaguuagcucaagcggG.....    | 11   | 1 | j19 |
| .....cgggucgggaguuagcucaagAggu.....    | 3    | 1 | j19 |
| .....cgggucgggagAuaagcucaagcgggu.....  | 2    | 1 | j19 |
| .....cgggucgggagCuagcucaagcgggu.....   | 3    | 1 | j19 |
| .....cgggGcgggaguuagcucaagcgggu.....   | 42   | 1 | j19 |
| .....Ugggucgggaguuagcucaagcgggu.....   | 1    | 1 | j19 |
| .....cgggucgggaguuagcucaagcgguuG.....  | 3    | 1 | j19 |
| .....cgggucgggagCuagcucaagcgggu.....   | 1    | 1 | j19 |
| .....cgggucgggaguuagcucaagcgguuU.....  | 150  | 1 | j19 |
| .....cgggucgggaguuagcucCagcgggu.....   | 1    | 1 | j19 |
| .....cgggucgggaguuagcucaagcgguuA.....  | 258  | 1 | j19 |
| .....cgggucgggaguuagcucaagcgguuCa..... | 1    | 1 | j19 |
| .....cgggucgCaguuagcucaagcgguu.....    | 1    | 1 | j19 |
| .....cgggucgggagGuaagcucaagcgguu.....  | 1    | 1 | j19 |

cuaccgggucgggaguuagcucaagcgguuuaccuccuacugcgggacuuucuaucuguccaucucugugcgggguuucgagaccgcggggugcuuacugaccuuuuuug

|                                        |      |   |     |
|----------------------------------------|------|---|-----|
| .....cgggucgggaguuagcucaagcgguuu.....  | 22   | 0 | j19 |
| .....cgggGcgggaguuagcucaagcgguuu.....  | 4    | 1 | j19 |
| .....cgggucgggaguuagcucaagcgguuCc..... | 1    | 1 | j19 |
| .....cgggucgggaguuagcucaagcgguuuA..... | 17   | 1 | j19 |
| .....gggucgggaguuagcucaaA.....         | 1    | 1 | j19 |
| .....ggguAaggaguuagcucaag.....         | 1    | 1 | j19 |
| .....gggucgggaguuagcucaagA.....        | 1    | 1 | j19 |
| .....gggucgggaguuagcucaagc.....        | 4    | 0 | j19 |
| .....gggGcgggaguuagcucaagcgg.....      | 1    | 1 | j19 |
| .....ggguAaggaguuagcucaagcgg.....      | 1    | 1 | j19 |
| .....gggucgggaguuagcucaagcgg.....      | 11   | 0 | j19 |
| .....gggGcgggaguuagcucaagcgg.....      | 38   | 1 | j19 |
| .....gggucgggaguuagcuAaagcgg.....      | 2    | 1 | j19 |
| .....gCgucgggaguuagcucaagcgg.....      | 1    | 1 | j19 |
| .....gggucgggaguuagcucaagcggC.....     | 2    | 1 | j19 |
| .....gggucgggaguuagcucaagcgg.....      | 1    | 1 | j19 |
| .....gggucgggaguuCgcucaagcgg.....      | 4    | 1 | j19 |
| .....ggguAaggaguuagcucaagcgg.....      | 6    | 1 | j19 |
| .....gggucgCaguuagcucaagcgg.....       | 1    | 1 | j19 |
| .....gggAcggaguuagcucaagcgg.....       | 3    | 1 | j19 |
| .....gggucgggaguuagcucaaAacgg.....     | 1    | 1 | j19 |
| .....gggucgggagCuagcucaagcgg.....      | 4    | 1 | j19 |
| .....gggucgggaguuCagcucaagcgg.....     | 1    | 1 | j19 |
| .....gggucgggaguuagAuaagcgg.....       | 7    | 1 | j19 |
| .....gggucgggaguuagcucaagcggA.....     | 1    | 1 | j19 |
| .....gggucgggaguuagcucaCgccc.....      | 1    | 1 | j19 |
| .....ggguUggaguuagcucaagcgg.....       | 3    | 1 | j19 |
| .....gggucggCguuagcucaagcgg.....       | 2    | 1 | j19 |
| .....gggucgggaguuagcucaagAagg.....     | 1    | 1 | j19 |
| .....gggucgggaguuagcucCagcgg.....      | 13   | 1 | j19 |
| .....gggucgggaguuagUucaagcgg.....      | 2    | 1 | j19 |
| .....gggucgggaguuagcCcaagcgg.....      | 2    | 1 | j19 |
| .....gggucgggaguuagGuaagcgg.....       | 1    | 1 | j19 |
| .....gggucgggaguuagcucaagcgg.....      | 2    | 1 | j19 |
| .....gggucgggaguuagcucaGgccc.....      | 1    | 1 | j19 |
| .....gggucgggaguuagcucaagcgg.....      | 475  | 0 | j19 |
| .....ggAucgggaguuagcucaagcgg.....      | 1    | 1 | j19 |
| .....gggucgggaguuagcucaagcggU.....     | 12   | 1 | j19 |
| .....gggucgggaUuuagcucaagcgg.....      | 4    | 1 | j19 |
| .....gggucgggaguuagcGcaagcgg.....      | 10   | 1 | j19 |
| .....Cggucgggaguuagcucaagcgg.....      | 2    | 1 | j19 |
| .....gggCcgaguuagcucaagcgg.....        | 5    | 1 | j19 |
| .....gggucgggaguuagcucGagcgg.....      | 1    | 1 | j19 |
| .....gggucggGguuagcucaagcgg.....       | 3    | 1 | j19 |
| .....gggucgggaguuagcucaagcgg.....      | 2    | 1 | j19 |
| .....gggucgggaguuagcucaagcgg.....      | 2    | 1 | j19 |
| .....gggucgggaguuUcuaagcgg.....        | 1    | 1 | j19 |
| .....gggucgggaguuagcucaaUcgg.....      | 1    | 1 | j19 |
| .....Uggucgggaguuagcucaagcgg.....      | 1    | 1 | j19 |
| .....gggucgggaguuagcucaaCccc.....      | 2    | 1 | j19 |
| .....ggCucgggaguuagcucaagcgg.....      | 1    | 1 | j19 |
| .....Uggucgggaguuagcucaagcgggu.....    | 14   | 1 | j19 |
| .....gggucgggaguuUcuaagcgggu.....      | 2    | 1 | j19 |
| .....gggucgggaguuGagcucaagcgggu.....   | 25   | 1 | j19 |
| .....gCgucgggaguuagcucaagcgggu.....    | 12   | 1 | j19 |
| .....ggAucgggaguuagcucaagcgggu.....    | 9    | 1 | j19 |
| .....gggucgggaguuagcucaagAaggu.....    | 10   | 1 | j19 |
| .....Aaggucgggaguuagcucaagcgggu.....   | 3    | 1 | j19 |
| .....gggucgggaguuUgcucaagcgggu.....    | 1    | 1 | j19 |
| .....gggucgggaguuagcucaagcgggu.....    | 5140 | 0 | j19 |
| .....gggucgggaUuuagcucaagcgggu.....    | 1    | 1 | j19 |
| .....gggucgggagCuagcucaagcgggu.....    | 39   | 1 | j19 |
| .....gggucgggaguuagGuaagcgggu.....     | 4    | 1 | j19 |
| .....gggucgggaguuagcucaagcAgu.....     | 2    | 1 | j19 |
| .....gggucgggaguuagcucGagcgggu.....    | 3    | 1 | j19 |
| .....gggucgggaguuagcGcaagcgggu.....    | 61   | 1 | j19 |
| .....gggucgggaguuAagcucaagcgggu.....   | 1    | 1 | j19 |
| .....gggucggCguuagcucaagcgggu.....     | 26   | 1 | j19 |
| .....gggAcgggaguuagcucaagcgggu.....    | 24   | 1 | j19 |

cuaccgggucgggaguuagcucaagcgguuaccuccuacugcgggacuuucuaucuguccaucucugugcgggguuucgagaccgcgggugcuuacugaccuuuuuug

|                                      |     |   |     |
|--------------------------------------|-----|---|-----|
| .....gggucgggaguuagcucUagcgggu.....  | 1   | 1 | j19 |
| .....gggucgggaguuagcucaagcggG.....   | 38  | 1 | j19 |
| .....gggucgggaguuagcucaagcgggu.....  | 30  | 1 | j19 |
| .....gggucgCaguuagcucaagcgggu.....   | 4   | 1 | j19 |
| .....gggucgggaguuagcucaagcgggu.....  | 18  | 1 | j19 |
| .....gAgucgggaguuagcucaagcgggu.....  | 3   | 1 | j19 |
| .....gggucgUaguuagcucaagcgggu.....   | 3   | 1 | j19 |
| .....gggucgggaguuagcucaaaUcgggu..... | 2   | 1 | j19 |
| .....gggucgggaguuagcucaagcgggu.....  | 21  | 1 | j19 |
| .....gggucgggaguuagcucaagcgggu.....  | 1   | 1 | j19 |
| .....gggucgggaguuagcucaagcggA.....   | 83  | 1 | j19 |
| .....gggucgggaguuagcucaagcgggu.....  | 20  | 1 | j19 |
| .....gggucgggaguuagcucaagcggAu.....  | 1   | 1 | j19 |
| .....gggucgggaguuGgcucaagcgggu.....  | 1   | 1 | j19 |
| .....gggGcgggaguuagcucaagcgggu.....  | 256 | 1 | j19 |
| .....gggucgggagGuaucucaagcgggu.....  | 65  | 1 | j19 |
| .....gggucgggaguuagcCaaagcgggu.....  | 11  | 1 | j19 |
| .....gggucgggaguuagcucaagcggC.....   | 57  | 1 | j19 |
| .....gggucgggaguuCagcucaagcgggu..... | 9   | 1 | j19 |
| .....gggucgggaguuagcuGaaagcgggu..... | 8   | 1 | j19 |
| .....Cggucgggaguuagcucaagcgggu.....  | 12  | 1 | j19 |
| .....gggucgggaguuagcucaagcUgu.....   | 4   | 1 | j19 |
| .....gggucgggaguuagcucaagUgggu.....  | 10  | 1 | j19 |
| .....gggucgggaguuagUucaagcgggu.....  | 23  | 1 | j19 |
| .....gggucgggaguuagcucaaaLcgggu..... | 2   | 1 | j19 |
| .....gggucgggaguuagcucaaaCcgggu..... | 9   | 1 | j19 |
| .....ggguUgggaguuagcucaagcgggu.....  | 9   | 1 | j19 |
| .....ggUucgggaguuagcucaagcgggu.....  | 1   | 1 | j19 |
| .....gggucgggaguuagcucaagGgggu.....  | 4   | 1 | j19 |
| .....gggCcgggaguuagcucaagcgggu.....  | 44  | 1 | j19 |
| .....gggucAgaguuagcucaagcgggu.....   | 1   | 1 | j19 |
| .....ggguAaggaguuagcucaagcgggu.....  | 33  | 1 | j19 |
| .....gggucgggaguuagcuUaaagcgggu..... | 8   | 1 | j19 |
| .....ggCucgggaguuagcucaagcgggu.....  | 17  | 1 | j19 |
| .....gggucgggaguuagcucaagcGU.....    | 8   | 1 | j19 |
| .....gggucUgaguuagcucaagcgggu.....   | 1   | 1 | j19 |
| .....gggucgggaguuAaCcucaagcgggu..... | 2   | 1 | j19 |
| .....gggucgggaUuuagcucaagcgggu.....  | 2   | 1 | j19 |
| .....gggucgggUuuagcucaagcgggu.....   | 5   | 1 | j19 |
| .....gggucgggaCuuaagcucaagcgggu..... | 4   | 1 | j19 |
| .....gggucCgaguuagcucaagcgggu.....   | 2   | 1 | j19 |
| .....gggucggGuuagcucaagcgggu.....    | 21  | 1 | j19 |
| .....gggucgggaguuagcAcaagcgggu.....  | 1   | 1 | j19 |
| .....gggucgggaguuagcucaagcCgu.....   | 1   | 1 | j19 |
| .....gggucgggaguuCgcucaagcgggu.....  | 8   | 1 | j19 |
| .....gggucgggaguuagcucaagcGcu.....   | 3   | 1 | j19 |
| .....gggucgggaguuagcucCagcgggu.....  | 73  | 1 | j19 |
| .....gggucgggaguuagcucaCgcgggu.....  | 32  | 1 | j19 |
| .....gggucgggaguuagcCcaagcgggu.....  | 6   | 1 | j19 |
| .....gggucgggaguuagUucaagcgggu.....  | 12  | 1 | j19 |
| .....gggucgggaguuagcucaUgcgggu.....  | 3   | 1 | j19 |
| .....gggucgggaguuagcucaagcggG.....   | 24  | 1 | j19 |
| .....gggucgggaguuagcucaagcggguC..... | 13  | 1 | j19 |
| .....gggucgggaguuagcucaagUgggu.....  | 5   | 1 | j19 |
| .....gggucgggaguuagcucaagcGcu.....   | 1   | 1 | j19 |
| .....gggucgggaCuuaagcucaagcgggu..... | 4   | 1 | j19 |
| .....gggucgggaguuagcucaagcggCu.....  | 36  | 1 | j19 |
| .....gggucgggaguuagcucGagcgggu.....  | 2   | 1 | j19 |
| .....gggucgggaguuagcucaagcgggu.....  | 18  | 1 | j19 |
| .....gggucgggaguuagcucaagAagggu..... | 5   | 1 | j19 |
| .....gAgucgggaguuagcucaagcgggu.....  | 2   | 1 | j19 |
| .....gggucgggUuuagcucaagcgggu.....   | 3   | 1 | j19 |
| .....gggucgggaguuagcucaagcggAu.....  | 16  | 1 | j19 |
| .....gggucgggUuuagcucaagcgggu.....   | 16  | 1 | j19 |
| .....gUucgggaguuagcucaagcgggu.....   | 1   | 1 | j19 |
| .....gggucgggaguuagcucaaaCcgggu..... | 3   | 1 | j19 |
| .....gggucgggaguuagcucaagGgggu.....  | 3   | 1 | j19 |
| .....gggucgggaguuagcucCagcgggu.....  | 42  | 1 | j19 |
| .....gggGcgggaguuagcucaagcgggu.....  | 153 | 1 | j19 |

cuaccgggucggaguagcucaagcgguuuaccuccuacugcggacuucuaucuguccaucucugucgggguuucgagaccgcgggucuuacugaccuuuuuag

|                                     |      |   |     |
|-------------------------------------|------|---|-----|
| .....gCgucggaguuagcucaagcgguu.....  | 11   | 1 | j19 |
| .....gggucgCaguuagcucaagcgguu.....  | 5    | 1 | j19 |
| .....gggucggaguCagcucaagcgguu.....  | 5    | 1 | j19 |
| .....ggguλggaguuagcucaagcgguu.....  | 21   | 1 | j19 |
| .....gggucggaguuagcucaaUcgguu.....  | 1    | 1 | j19 |
| .....ggguUggaguuagcucaagcgguu.....  | 7    | 1 | j19 |
| .....gggucggaguuagcucaagcgguu.....  | 2727 | 0 | j19 |
| .....gggucggagGuaagcucaagcgguu..... | 23   | 1 | j19 |
| .....gggucUggaguuagcucaagcgguu..... | 2    | 1 | j19 |
| .....λggucggaguuagcucaagcgguu.....  | 1    | 1 | j19 |
| .....gggucλgaguuagcucaagcgguu.....  | 2    | 1 | j19 |
| .....Cggucggaguuagcucaagcgguu.....  | 3    | 1 | j19 |
| .....gggucggagλagcucaagcgguu.....   | 1    | 1 | j19 |
| .....Uggucggaguuagcucaagcgguu.....  | 10   | 1 | j19 |
| .....ggCucggaguuagcucaagcgguu.....  | 8    | 1 | j19 |
| .....gggucggaguuagcucaGgcgguu.....  | 1    | 1 | j19 |
| .....gggCcgaguuagcucaagcgguu.....   | 27   | 1 | j19 |
| .....gggucggaguuagGuaagcgguu.....   | 7    | 1 | j19 |
| .....gggucggaguuagcAcaagcgguu.....  | 2    | 1 | j19 |
| .....gggucggagUgagcucaagcgguu.....  | 13   | 1 | j19 |
| .....gggucggaguuagcucaagcggUG.....  | 36   | 1 | j19 |
| .....gggucggCGuuagcucaagcgguu.....  | 12   | 1 | j19 |
| .....gggucggaguuagcGcaagcgguu.....  | 39   | 1 | j19 |
| .....gggucggaguuUcuaagcgguu.....    | 3    | 1 | j19 |
| .....gggucggaguuagcuλaagcgguu.....  | 15   | 1 | j19 |
| .....gggucggaguuagcuUaagcgguu.....  | 7    | 1 | j19 |
| .....gggucggaguuGgcuaagcgguu.....   | 1    | 1 | j19 |
| .....gggucggaguuagcucaagcgUuu.....  | 8    | 1 | j19 |
| .....gggucggaguuCgcuaagcgguu.....   | 5    | 1 | j19 |
| .....gggλcggaguuagcucaagcgguu.....  | 10   | 1 | j19 |
| .....gggucggaguuagcucaCgcgguu.....  | 13   | 1 | j19 |
| .....gggucggaguuagcucaagcggUλ.....  | 436  | 1 | j19 |
| .....gggucggagλuagcucaagcgguu.....  | 14   | 1 | j19 |
| .....ggguGggaguuagcucaagcgguu.....  | 18   | 1 | j19 |
| .....gggucggaguuagcuGaaagcgguu..... | 7    | 1 | j19 |
| .....ggλucggaguuagcucaagcgguu.....  | 5    | 1 | j19 |
| .....gggucggagCuaagcucaagcgguu..... | 23   | 1 | j19 |
| .....gggucggaguuagcucaagcggGua..... | 1    | 1 | j19 |
| .....gggGcggaguuagcucaagcgguu.....  | 4    | 1 | j19 |
| .....gggucggaguuagcucaCgcgguu.....  | 1    | 1 | j19 |
| .....gCgucggaguuagcucaagcgguu.....  | 1    | 1 | j19 |
| .....gggλcggaguuagcucaagcgguu.....  | 1    | 1 | j19 |
| .....gggucggaguuagcucaagcgguuG..... | 12   | 1 | j19 |
| .....gggucggaguuagcucaagcgguuC..... | 2    | 1 | j19 |
| .....gggucggaguuagcuCagcgguu.....   | 3    | 1 | j19 |
| .....gggucggaguuagcucaagcgguu.....  | 116  | 0 | j19 |
| .....gggucggaguuagcucaagcgguuU..... | 1079 | 1 | j19 |
| .....gggucggagCuaagcucaagcgguu..... | 2    | 1 | j19 |
| .....gggucggaguuagcucaagcggCua..... | 1    | 1 | j19 |
| .....gggucggagGuaagcucaagcgguu..... | 1    | 1 | j19 |
| .....gggucggaguuagcucaagcggUλ.....  | 207  | 1 | j19 |
| .....gggucggagUgagcucaagcgguu.....  | 1    | 1 | j19 |
| .....gggucggaguuagcucaagcggUca..... | 5    | 1 | j19 |
| .....gggucggaguuagcuGaaagcgguu..... | 1    | 1 | j19 |
| .....ggguλggaguuagcucaagcgguu.....  | 2    | 1 | j19 |
| .....gggucggaguuCgcuaagcgguu.....   | 1    | 1 | j19 |
| .....gggucggGguagcucaagcgguu.....   | 1    | 1 | j19 |
| .....gggucggCguuagcucaagcgguu.....  | 1    | 1 | j19 |
| .....gggucggaguuagcucaagcgguuλ..... | 54   | 1 | j19 |
| .....gggucggaguuagcucaagcgguuU..... | 2    | 1 | j19 |
| .....ggucggaguuagcuUaagcgg.....     | 1    | 1 | j19 |
| .....ggucggagUcagcucaagcgg.....     | 1    | 1 | j19 |
| .....ggucggaguuagcucaagcgg.....     | 4    | 0 | j19 |
| .....ggucggaguuagcucaagcggUλ.....   | 1    | 1 | j19 |
| .....ggucggaguuagcucaagcgguu.....   | 3    | 0 | j19 |
| .....ggucggaguuagcucaagcgguuU.....  | 2    | 1 | j19 |
| .....ucggaguuagcucCagcgg.....       | 1    | 1 | j19 |
| .....cggaguuagcGcaagcgguu.....      | 1    | 1 | j19 |
| .....Gggaguuagcucaagcgguu.....      | 1    | 1 | j19 |



cuaccgggucggaguuagcucaagcgguuaccuccucaugcgggacuuucuaucuguccaucucugucggggucgagaccgcgggugcuuacugaccuuuauug

|                                  |     |   |     |
|----------------------------------|-----|---|-----|
| .....ggGguuagcucaagcgggu.....    | 1   | 1 | j19 |
| .....ggaguuagcuUaagcgggu.....    | 1   | 1 | j19 |
| .....uaccuccucaugcgggacu.....    | 3   | 0 | j19 |
| .....uaccuccucaugcgggacA.....    | 1   | 1 | j19 |
| .....uaccucAucaugcgggacu.....    | 1   | 1 | j19 |
| .....uaccuccucaugcgggacuuA.....  | 1   | 1 | j19 |
| .....uaccucUucaugcgggacuuu.....  | 1   | 1 | j19 |
| .....uaccuccucaugcgggacuuu.....  | 29  | 0 | j19 |
| .....uCCuccucaugcgggacuuu.....   | 1   | 1 | j19 |
| .....uaccuccucaugcggCcuuuc.....  | 1   | 1 | j19 |
| .....uaccuccucaugcgggacuuuc..... | 2   | 0 | j19 |
| .....uaccuccucaugcggCcuuuc.....  | 1   | 1 | j19 |
| .....cuccucaugcgggacuuuc.....    | 2   | 0 | j19 |
| .....cucugugcggggucgagacc.....   | 1   | 0 | j19 |
| .....cugugcggggucgagac.....      | 1   | 0 | j19 |
| .....accgcgggugcuuacugaccuu..... | 5   | 0 | j19 |
| .....accgcgggGgcuuacugaccuu..... | 1   | 1 | j19 |
| .....accgcgggugAuuacugaccuu..... | 1   | 1 | j19 |
| .....accgcgggugcuuacugaccuu..... | 4   | 0 | j19 |
| .....cgcgggCgcuuacugacc.....     | 2   | 1 | j19 |
| .....cgcgggugcuuacugacA.....     | 2   | 1 | j19 |
| .....cgcgggugcuuacugaAc.....     | 1   | 1 | j19 |
| .....cgcgggugcuuUugacc.....      | 1   | 1 | j19 |
| .....cgcgggugcuuacugacc.....     | 23  | 0 | j19 |
| .....cgcgggugcuuacugaUc.....     | 1   | 1 | j19 |
| .....cgcgggGgcuuacugacc.....     | 1   | 1 | j19 |
| .....cgcgggCgcuuacugacc.....     | 2   | 1 | j19 |
| .....cgcgggugcuuacugaccA.....    | 1   | 1 | j19 |
| .....cgcgggugcuuacugacc.....     | 10  | 0 | j19 |
| .....cgcgggugcuuacugaGcc.....    | 1   | 1 | j19 |
| .....cgcgggGgcuuacugacc.....     | 1   | 1 | j19 |
| .....cgcgggGgcuuacugacc.....     | 5   | 1 | j19 |
| .....cgcgggugcuuacugaGcc.....    | 1   | 1 | j19 |
| .....cgcgggugcuuUugacc.....      | 5   | 1 | j19 |
| .....Agcgggugcuuacugacc.....     | 1   | 1 | j19 |
| .....cgcgggucuuacugacc.....      | 1   | 1 | j19 |
| .....cgcgggugcuuAugacc.....      | 1   | 1 | j19 |
| .....cgcgggugcuuacugaccA.....    | 1   | 1 | j19 |
| .....cgcgggugcuuacugacUcu.....   | 1   | 1 | j19 |
| .....cgAgggugcuuacugacc.....     | 1   | 1 | j19 |
| .....cgcgggucuuacugacc.....      | 1   | 1 | j19 |
| .....cgcgggugcGcuuacugacc.....   | 1   | 1 | j19 |
| .....cgcgggCgcuuacugacc.....     | 9   | 1 | j19 |
| .....cgcgggugcGacugacc.....      | 1   | 1 | j19 |
| .....cgcgggugcuAacugacc.....     | 1   | 1 | j19 |
| .....Ugcgggugcuuacugacc.....     | 1   | 1 | j19 |
| .....cgcgggugcuuacugCccu.....    | 1   | 1 | j19 |
| .....cgcgggugcuuacugaccC.....    | 1   | 1 | j19 |
| .....cgcgggugcuuacuUaccu.....    | 1   | 1 | j19 |
| .....cgCggugcuuacugacc.....      | 2   | 1 | j19 |
| .....cgcgggugcuuacugaccAu.....   | 1   | 1 | j19 |
| .....cgcgggugcuuacGgacc.....     | 2   | 1 | j19 |
| .....cgcgggugcuuacugaAccu.....   | 4   | 1 | j19 |
| .....cgCuggugcuuacugacc.....     | 1   | 1 | j19 |
| .....cgcgggAgcuuacugacc.....     | 3   | 1 | j19 |
| .....cgcgggugcuuacugacc.....     | 235 | 0 | j19 |
| .....cgcgggugcuuacugaccG.....    | 3   | 1 | j19 |
| .....cgcgggugAuuacugacc.....     | 1   | 1 | j19 |
| .....cgcgggugcuuacugaccUu.....   | 2   | 1 | j19 |
| .....cgcgggugGuuacugacc.....     | 3   | 1 | j19 |
| .....cgcgggugcuuGugacc.....      | 3   | 1 | j19 |
| .....cgcgggugcuuacuCaaccu.....   | 1   | 1 | j19 |
| .....cgcgggugcuuGugacc.....      | 2   | 1 | j19 |
| .....cgcgggugcCuacugacc.....     | 7   | 1 | j19 |
| .....cgcgggugcuuacugaccAu.....   | 3   | 1 | j19 |
| .....cgcgggugcuCaacugacc.....    | 3   | 1 | j19 |
| .....cgcgggugcuuacugacUcu.....   | 5   | 1 | j19 |
| .....cgcgggugcuuacugaccUu.....   | 9   | 1 | j19 |

cuaccgggucggaguuagcucaagcgguuaccuccuacugcgggacuuuauucuguccaucucugucgggguuucgagaccggcgggugcuuacugacccuuuuuag

|                                  |      |   |     |
|----------------------------------|------|---|-----|
| .....cgcgAgugcuuacugacccuu.....  | 3    | 1 | j19 |
| .....cgcgggugcuuacCgacccuu.....  | 3    | 1 | j19 |
| .....cgcgggugcuuacugacCcu.....   | 1    | 1 | j19 |
| .....cgcgggGgcuuacugacccuu.....  | 58   | 1 | j19 |
| .....cgcgggugcuuacugacccuG.....  | 5    | 1 | j19 |
| .....cgcgggugcuuacugaAccuu.....  | 22   | 1 | j19 |
| .....cgcgggugcuuacugacccuu.....  | 2718 | 0 | j19 |
| .....cgcgggugcuGacugacccuu.....  | 18   | 1 | j19 |
| .....Ugcgggugcuuacugacccuu.....  | 15   | 1 | j19 |
| .....cgcgggugUuuacugacccuu.....  | 23   | 1 | j19 |
| .....cgcgCgugcuuacugacccuu.....  | 5    | 1 | j19 |
| .....cgcgggugcGuacugacccuu.....  | 4    | 1 | j19 |
| .....cgcggguCuuacugacccuu.....   | 2    | 1 | j19 |
| .....cgcgggugcuuacugCccuu.....   | 11   | 1 | j19 |
| .....cgcgggugcuuacugacCCuu.....  | 17   | 1 | j19 |
| .....cgcgggugcuAacugacccuu.....  | 1    | 1 | j19 |
| .....cCcgggugcuuacugacccuu.....  | 8    | 1 | j19 |
| .....cgcgggugcuuacuUacccuu.....  | 6    | 1 | j19 |
| .....cgcgggugGuuacugacccuu.....  | 7    | 1 | j19 |
| .....cgcgggugcuuacugacccuA.....  | 135  | 1 | j19 |
| .....cgcgggAgcuuacugacccuu.....  | 49   | 1 | j19 |
| .....cgcgggugcuuacuAacccuu.....  | 1    | 1 | j19 |
| .....cgcgggugcuuacugacCCG.....   | 20   | 1 | j19 |
| .....cUcgggugcuuacugacccuu.....  | 3    | 1 | j19 |
| .....cgcgggugcuuacugGccuu.....   | 1    | 1 | j19 |
| .....cgcgggugcuuacugUccuu.....   | 3    | 1 | j19 |
| .....cgcgggugcuuGcugacccuu.....  | 2    | 1 | j19 |
| .....cgcgggCgcuuacugacccuu.....  | 104  | 1 | j19 |
| .....cgCggugcuuacugacccuu.....   | 2    | 1 | j19 |
| .....cgcgggUcuuacugacccuu.....   | 6    | 1 | j19 |
| .....cgcgggugcuuacGacccuu.....   | 3    | 1 | j19 |
| .....cgAgggugcuuacugacccuu.....  | 14   | 1 | j19 |
| .....cgcgggugcuuUgacccuu.....    | 27   | 1 | j19 |
| .....cgUgggugcuuacugacccuu.....  | 9    | 1 | j19 |
| .....cgcgUgcuuacugacccuu.....    | 2    | 1 | j19 |
| .....cgGggugcuuacugacccuu.....   | 2    | 1 | j19 |
| .....cgcgggugcuuacugaUccuu.....  | 7    | 1 | j19 |
| .....cgcgggugcuuacuCacccuu.....  | 4    | 1 | j19 |
| .....cAcgggugcuuacugacccuu.....  | 1    | 1 | j19 |
| .....cgcgggugcuuAugacccuu.....   | 5    | 1 | j19 |
| .....cgcgggugcuuCugacccuu.....   | 22   | 1 | j19 |
| .....cgcgggugcuuacugacAcu.....   | 5    | 1 | j19 |
| .....cgcgggugcuuUcugacccuu.....  | 1    | 1 | j19 |
| .....Agcgggugcuuacugacccuu.....  | 7    | 1 | j19 |
| .....cgcgggugcuuacugacCCu.....   | 8    | 1 | j19 |
| .....cgcgggugcAacugacccuu.....   | 3    | 1 | j19 |
| .....cgcgUgugcuuacugacccuu.....  | 6    | 1 | j19 |
| .....cgcgggugAuacugacccuu.....   | 2    | 1 | j19 |
| .....cgcgCugcuuacugacccuu.....   | 4    | 1 | j19 |
| .....cgCggugcuuacugacccuu.....   | 3    | 1 | j19 |
| .....cgcgggugcuuacugacCCu.....   | 15   | 1 | j19 |
| .....cgcgggugcuuacugaGccuu.....  | 5    | 1 | j19 |
| .....cgcgggugcuuacugCccuu.....   | 1    | 1 | j19 |
| .....cCcgggugcuuacugacccuu.....  | 1    | 1 | j19 |
| .....cgcgggugcuuacugacCCGu.....  | 2    | 1 | j19 |
| .....cgcggguCuuacugacccuu.....   | 1    | 1 | j19 |
| .....cgcgggugcuuacugacccuu.....  | 3    | 1 | j19 |
| .....cgcgggGgcuuacugacccuu.....  | 6    | 1 | j19 |
| .....cgcgggugcuuacugacCCu.....   | 2    | 1 | j19 |
| .....cgcgggugUuuacugacccuu.....  | 3    | 1 | j19 |
| .....cgcgggugcuuGugacccuu.....   | 1    | 1 | j19 |
| .....cgcgggugcuuacuUacccuu.....  | 2    | 1 | j19 |
| .....cgcgggugcuuacugaAacuu.....  | 2    | 1 | j19 |
| .....cgcgggugcuuacugacAacuu..... | 2    | 1 | j19 |
| .....cgcgggugcGuacugacccuu.....  | 1    | 1 | j19 |
| .....cgcgggugcuuacugacCCAu.....  | 1    | 1 | j19 |
| .....cgcgggCgcuuacugacccuu.....  | 10   | 1 | j19 |
| .....cgcgUgugcuuacugacccuu.....  | 1    | 1 | j19 |
| .....cgcgggugcuuacuCacccuu.....  | 1    | 1 | j19 |



cuaccgggucgggaguuagcucaagcgguuaccuccuacugcgggacuuucuaucuguccaucucugucgggguuucgagaccgcggggugcuuacugaccuuuuuug

|                                        |     |   |     |
|----------------------------------------|-----|---|-----|
| .....cgggucgggaguuagUucaagcgggu.....   | 1   | 1 | j03 |
| .....cgggucgggaguuagcucaagcgggu.....   | 125 | 0 | j03 |
| .....cgggAcgggaguuagcucaagcgggu.....   | 4   | 1 | j03 |
| .....cgggucgggCguuagcucaagcgggu.....   | 6   | 1 | j03 |
| .....cgggGcgggaguuagcucaagcgggu.....   | 3   | 1 | j03 |
| .....cgggucgggaguuagcuGaaagcgggu.....  | 1   | 1 | j03 |
| .....cgggucgUaguuuagcucaagcgggu.....   | 1   | 1 | j03 |
| .....cgggucgggagGuaagcucaagcgggu.....  | 1   | 1 | j03 |
| .....cgggucgggaguuagcucaagcggGA.....   | 7   | 1 | j03 |
| .....cgggucgggaguuCgcucaagcgggu.....   | 1   | 1 | j03 |
| .....cggUucgggaguuagcucaagcgggu.....   | 1   | 1 | j03 |
| .....cgggucgggaguuagcucaagcggG.....    | 2   | 1 | j03 |
| .....cgggucgggaguuUucaagcgggu.....     | 2   | 1 | j03 |
| .....cgggucgggaguuagcucaUgcgggu.....   | 1   | 1 | j03 |
| .....cgggucgggaguuagcucaagcggguC.....  | 1   | 1 | j03 |
| .....cgggucgggaguuagcuAaagcgggu.....   | 1   | 1 | j03 |
| .....cgggucgggCguuagcucaagcgggu.....   | 2   | 1 | j03 |
| .....cgggucgggaguuagcucaagcggguG.....  | 1   | 1 | j03 |
| .....cgggAcgggaguuagcucaagcgggu.....   | 3   | 1 | j03 |
| .....cgggucgggaguuagGucaagcgggu.....   | 1   | 1 | j03 |
| .....cgggGcgggaguuagcucaagcgggu.....   | 2   | 1 | j03 |
| .....cgggucgggaguuagcGcaagcgggu.....   | 1   | 1 | j03 |
| .....cgggucgggaguuagcucaagcggCu.....   | 1   | 1 | j03 |
| .....cgggucgggaguuUucaagcgggu.....     | 1   | 1 | j03 |
| .....cgggucgggaguuagcucaagcggguA.....  | 14  | 1 | j03 |
| .....cgggucgggaguuagcucaagcgggu.....   | 34  | 0 | j03 |
| .....cgggucgggaguuagcucaagcgguuU.....  | 8   | 1 | j03 |
| .....cgggucgggaguuagcucaagcgguuAa..... | 6   | 1 | j03 |
| .....cgggucgggaguuagcucaagcgguuua..... | 4   | 0 | j03 |
| .....gggucgggaguuagcucaagc.....        | 1   | 0 | j03 |
| .....gggAcgggaguuagcucaagcggg.....     | 1   | 1 | j03 |
| .....gggucgggaguuUucaagcggg.....       | 1   | 1 | j03 |
| .....gggucgggaguuagcucaagcggg.....     | 7   | 0 | j03 |
| .....gggucgggaguuagcucaagcgggC.....    | 2   | 1 | j03 |
| .....gggucgggagGuaagcucaagcgggu.....   | 1   | 1 | j03 |
| .....gggucgggaguuCgcucaagcgggu.....    | 1   | 1 | j03 |
| .....gggGcgggaguuagcucaagcgggu.....    | 1   | 1 | j03 |
| .....gggCcggaguuagcucaagcgggu.....     | 1   | 1 | j03 |
| .....gggucgggaguuagcucaagcggGA.....    | 3   | 1 | j03 |
| .....gggucgggaguuagcucaagcgggu.....    | 36  | 0 | j03 |
| .....gggucgggaguuagcucaagGgggu.....    | 1   | 1 | j03 |
| .....gggucgggaguuagcucaCgcgggu.....    | 1   | 1 | j03 |
| .....gggucgggaguuagcucaagcggguA.....   | 3   | 1 | j03 |
| .....gggucgggaguuagcucaagcggguC.....   | 1   | 1 | j03 |
| .....ggCucgggaguuagcucaagcgggu.....    | 1   | 1 | j03 |
| .....gggucgggaguuCgcucaagcgggu.....    | 1   | 1 | j03 |
| .....gggucgggaguuagcAcaagcgggu.....    | 1   | 1 | j03 |
| .....gggucgggaguuagcucaagcggUuu.....   | 3   | 1 | j03 |
| .....gggucgggaguuagUucaagcgggu.....    | 1   | 1 | j03 |
| .....gggucgggaguuagcucaagcgggu.....    | 28  | 0 | j03 |
| .....gggucgggaguuagcucCagcgggu.....    | 2   | 1 | j03 |
| .....gggucgggCguuagcucaagcgggu.....    | 1   | 1 | j03 |
| .....gggucgggaguuagcucaagcggGdu.....   | 1   | 1 | j03 |
| .....ggguAgggaguuagcucaagcgggu.....    | 1   | 1 | j03 |
| .....gggucgggaguuagcucaagcggguAa.....  | 1   | 1 | j03 |
| .....gggucgggaguuagcucaagcggguua.....  | 5   | 0 | j03 |
| .....gggucgggaguuagcucaagcggguU.....   | 20  | 1 | j03 |
| .....cgcgggugcuuacugacc.....           | 1   | 0 | j03 |
| .....cgcgggugcuuacuCaaccu.....         | 1   | 1 | j03 |
| .....cgcgggugcuuacugaccuu.....         | 7   | 0 | j03 |
| .....cgcgggCgcuuacugaccuu.....         | 2   | 1 | j03 |
| .....Ugcgggugcuuacugaccuu.....         | 1   | 1 | j03 |
| .....cgcgggugcuuacugaccuu.....         | 21  | 0 | j03 |
| .....cgcgggugcuuacugacUcu.....         | 1   | 1 | j03 |
| .....cgcgggugcuuacugaccuuA.....        | 3   | 1 | j03 |
| .....cgcgggAgcuuacugaccuu.....         | 1   | 1 | j03 |
| .....cgcgggugcuuUugaccuu.....          | 1   | 1 | j03 |
| .....cgcgggGgcuuacugaccuu.....         | 1   | 1 | j03 |
| .....cgcgggugcuuacugaccuuu.....        | 2   | 0 | j03 |



cuaccgggucggaguuagcucaagcgguuaccuccuacugcggacuuucuaucuguccaucucugucgggguuucgagaccgcgggugcuuacugaccuuuuuag

|                                      |    |   |     |
|--------------------------------------|----|---|-----|
| .....cgcgggugcuuacugaccuu.....       | 10 | 0 | k04 |
| .....cgcgggugcuuacugaccuuu...        | 17 | 0 | k04 |
| .....cgcgggugcuuacugaccuuuu...       | 1  | 0 | k04 |
| .....cgcgggugcuuacugaccuuuA...       | 1  | 1 | k04 |
| .....gcgggugcuuacugaccuuu...         | 1  | 0 | k04 |
| ..accgggucggaguuagcucaagc.....       | 4  | 0 | s01 |
| ..accgggucggaguuagcucaagcg.....      | 2  | 0 | s01 |
| ..accgggGcggaguuagcucaagcg.....      | 1  | 1 | s01 |
| ..accgggGcggaguuagcucaagcgg.....     | 1  | 1 | s01 |
| ..accgggucggaguuagcucaagcgU.....     | 1  | 1 | s01 |
| ..accgggucggaguuagcucaagcgg.....     | 20 | 0 | s01 |
| ..accgggucggaguuagcucaagAgg.....     | 1  | 1 | s01 |
| ..accgggGcggaguuagcucaagcgg.....     | 4  | 1 | s01 |
| ..accgggCcgaguuagcucaagcgg.....      | 1  | 1 | s01 |
| ..accgggucggaguuagcucaagcgg.....     | 37 | 0 | s01 |
| ..accgggucggGuuagcucaagcgg.....      | 1  | 1 | s01 |
| ..accgggucggaguuagcucaagcggA.....    | 1  | 1 | s01 |
| ..accgggucggaguuagcucaagcgguu.....   | 14 | 0 | s01 |
| ..accgggGcggaguuagcucaagcgguu.....   | 1  | 1 | s01 |
| ..accgggucggaguuagcucaagcgguuA.....  | 4  | 0 | s01 |
| ..accgggucggaguuagcucaagcgguuU.....  | 1  | 1 | s01 |
| ..accgggucggaguuagcucaagcgguuAU..... | 1  | 1 | s01 |
| ..Accgggucggaguuagcucaagc.....       | 2  | 1 | s01 |
| ..Accgggucggaguuagcucaagcg.....      | 2  | 1 | s01 |
| ..ccgggCcgaguuagcucaagcgg.....       | 1  | 1 | s01 |
| ..Accgggucggaguuagcucaagcgg.....     | 12 | 1 | s01 |
| ..ccgggucggaguuagcucaagcgg.....      | 3  | 0 | s01 |
| ..ccgggucggaguuagcucaagcgg.....      | 11 | 0 | s01 |
| ..ccgggucggaguuagcucaagcggA.....     | 1  | 1 | s01 |
| ..Accgggucggaguuagcucaagcgg.....     | 12 | 1 | s01 |
| ..ccgggCcgaguuagcucaagcgg.....       | 1  | 1 | s01 |
| ..ccgggucggaguuagcucaagcggU.....     | 1  | 1 | s01 |
| ..Gccgggucggaguuagcucaagcgg.....     | 1  | 1 | s01 |
| ..ccgggucggaguuagcucaagcgguu.....    | 2  | 0 | s01 |
| ..Accgggucggaguuagcucaagcgguu.....   | 2  | 1 | s01 |
| ..ccgggucggaguuagcucaagcg.....       | 1  | 0 | s01 |
| ..ccgggucggaguuagcucaagcgg.....      | 21 | 0 | s01 |
| ..ccgggGcggaguuagcucaagcgg.....      | 1  | 1 | s01 |
| ..cGgggucggaguuagcucaagcgg.....      | 1  | 1 | s01 |
| ..ccgggCcgaguuagcucaagcgg.....       | 1  | 1 | s01 |
| ..cGgggucggaguuagcucaagcgg.....      | 1  | 1 | s01 |
| ..ccgggucggaguuagcucaaUcgg.....      | 1  | 1 | s01 |
| ..ccgggucggaguuagcucaagcggA.....     | 2  | 1 | s01 |
| ..ccgggAcggaguuagcucaagcgg.....      | 1  | 1 | s01 |
| ..ccUgggucggaguuagcucaagcgg.....     | 2  | 1 | s01 |
| ..ccgggucggaguuagcucaagcgg.....      | 23 | 0 | s01 |
| ..ccgggucggaguuagcucaagcggA.....     | 1  | 1 | s01 |
| ..ccgggucggaguuagcucaagcgguu.....    | 3  | 0 | s01 |
| ..ccgggucggaguuagcucaagcgguuAa.....  | 1  | 1 | s01 |
| ..ccgggucggaguuagcucaag.....         | 4  | 0 | s01 |
| ..cgggGcggaguuagcucaagc.....         | 2  | 1 | s01 |
| ..Ggggucggaguuagcucaagc.....         | 1  | 1 | s01 |
| ..cgggGcggaguuagcucaagc.....         | 22 | 0 | s01 |
| ..cgggGcggaguuagcucaagcg.....        | 2  | 1 | s01 |
| ..cgggucggaguuagcucaagcg.....        | 41 | 0 | s01 |
| ..Ggggucggaguuagcucaagcg.....        | 1  | 1 | s01 |
| ..cgggCcgaguuagcucaagcgg.....        | 9  | 1 | s01 |
| ..cgggucggaguuGagcucaagcgg.....      | 2  | 1 | s01 |
| ..cgggAcggaguuagcucaagcgg.....       | 5  | 1 | s01 |
| ..cgggucggagCuagcucaagcgg.....       | 1  | 1 | s01 |
| ..cgggucggaguuagcucaagcCg.....       | 2  | 1 | s01 |
| ..cgggucggaguuagcuUaagcgg.....       | 1  | 1 | s01 |
| ..cgggucggaguuagcucaagcgA.....       | 7  | 1 | s01 |
| ..Ugggucggaguuagcucaagcgg.....       | 2  | 1 | s01 |
| ..cgggucggaguuagcucaaUcgg.....       | 2  | 1 | s01 |
| ..cggguUggaguuagcucaagcgg.....       | 1  | 1 | s01 |
| ..cCgggucggaguuagcucaagcgg.....      | 1  | 1 | s01 |
| ..Ggggucggaguuagcucaagcgg.....       | 12 | 1 | s01 |

cuaccgggucgggaguuagcucaagcgguuaccucucuaugcggacuuucuaucuguccaucucugucgggguuucgagaccgcgggugcuuacugaccuuuuuug

|                                        |      |   |     |
|----------------------------------------|------|---|-----|
| .....cgggucggagGuaagcucaagcgg.....     | 8    | 1 | s01 |
| .....cgAgucggaguuagcucaagcgg.....      | 1    | 1 | s01 |
| .....cgggucggauuuagcucaagcgg.....      | 1    | 1 | s01 |
| .....Agggucggaguuagcucaagcgg.....      | 3    | 1 | s01 |
| .....cgggucggaguuagcucaagcUg.....      | 12   | 1 | s01 |
| .....cgggucggaguuagUucaagcgg.....      | 1    | 1 | s01 |
| .....cgggucCgaguuagcucaagcgg.....      | 1    | 1 | s01 |
| .....cgggucggaguuagcucGagcgg.....      | 1    | 1 | s01 |
| .....cgggucggaguuagcucUagcgg.....      | 1    | 1 | s01 |
| .....cgggucggaguuagcucCagcuaagcgg..... | 1    | 1 | s01 |
| .....cgggGcggaguuagcucaagcgg.....      | 74   | 1 | s01 |
| .....cgggucggaguuagcucaagcgg.....      | 1378 | 0 | s01 |
| .....cgggucggaguuagcucaaCcg.....       | 1    | 1 | s01 |
| .....cgggucggaguuagcGcaagcgg.....      | 1    | 1 | s01 |
| .....cggguAaggaguuagcucaagcgg.....     | 5    | 1 | s01 |
| .....cgggucggaguuagcucaagcU.....       | 5    | 1 | s01 |
| .....cgCgucggaguuagcucaagcgg.....      | 1    | 1 | s01 |
| .....cgggucggaguuUcuaagcgg.....        | 1    | 1 | s01 |
| .....cUggucggaguuagcucaagcgg.....      | 2    | 1 | s01 |
| .....cggguAaggaguuagcucaagcgg.....     | 5    | 1 | s01 |
| .....cgggucggaguuagcucaagcggC.....     | 11   | 1 | s01 |
| .....cgggucggaguuagcucGagcgg.....      | 1    | 1 | s01 |
| .....cgggucggauuuagcucaagcgg.....      | 1    | 1 | s01 |
| .....cgggucggaguuagcuAaagcgg.....      | 1    | 1 | s01 |
| .....cCggucggaguuagcucaagcgg.....      | 2    | 1 | s01 |
| .....cgggGcggaguuagcucaagcgg.....      | 144  | 1 | s01 |
| .....cgggucggaguuagcucaagcU.....       | 5    | 1 | s01 |
| .....cgggucggauuuagcucaagcgg.....      | 4    | 1 | s01 |
| .....cgggucggaguuagcucaaUcgg.....      | 3    | 1 | s01 |
| .....cgggucggaguuagcucUagcgg.....      | 4    | 1 | s01 |
| .....cgggucggaguuagcucaagcCg.....      | 3    | 1 | s01 |
| .....cgggucggaguuagcucaagcUg.....      | 33   | 1 | s01 |
| .....cgggucggGguuagcucaagcgg.....      | 2    | 1 | s01 |
| .....cgggucggUguuagcucaagcgg.....      | 2    | 1 | s01 |
| .....cgggucggaguuagcucCagcuaagcgg..... | 1    | 1 | s01 |
| .....cUggucggaguuagcucaagcgg.....      | 5    | 1 | s01 |
| .....cgggucggaguuagcucaUcgg.....       | 1    | 1 | s01 |
| .....cgggucggaguuagcucaagcggG.....     | 3    | 1 | s01 |
| .....cgggucggaguuagcucaagAgg.....      | 2    | 1 | s01 |
| .....cgggCcggaguuagcucaagcgg.....      | 12   | 1 | s01 |
| .....cgggucggaguuagcucaaCcg.....       | 1    | 1 | s01 |
| .....cgggucAgaguuagcucaagcgg.....      | 3    | 1 | s01 |
| .....cgggucggaguuagcuaagcgg.....       | 4    | 1 | s01 |
| .....cgggucggaguuagcGcaagcgg.....      | 1    | 1 | s01 |
| .....Gggucggaguuagcucaagcgg.....       | 107  | 1 | s01 |
| .....cgggucCgaguuagcucaagcgg.....      | 2    | 1 | s01 |
| .....cgggucgUaguuagcucaagcgg.....      | 1    | 1 | s01 |
| .....cgUgucggaguuagcucaagcgg.....      | 3    | 1 | s01 |
| .....cgggAcggaguuagcucaagcgg.....      | 7    | 1 | s01 |
| .....Agggucggaguuagcucaagcgg.....      | 4    | 1 | s01 |
| .....cgggucggaguuagcucaagcggA.....     | 65   | 1 | s01 |
| .....cgggucggagGuaagcucaagcgg.....     | 18   | 1 | s01 |
| .....cgggucggaguuagcAcaagcgg.....      | 2    | 1 | s01 |
| .....cggUcggaguuagcucaagcgg.....       | 2    | 1 | s01 |
| .....cgggucggaguuagUucaagcgg.....      | 2    | 1 | s01 |
| .....cgggucUgaguuagcucaagcgg.....      | 3    | 1 | s01 |
| .....cgggucggaguuUcuaagcgg.....        | 5    | 1 | s01 |
| .....cgggucggaguuagLucaagcgg.....      | 3    | 1 | s01 |
| .....Ugggucggaguuagcucaagcgg.....      | 6    | 1 | s01 |
| .....cgCgucggaguuagcucaagcgg.....      | 1    | 1 | s01 |
| .....cgggucggaguuagcucaagcgg.....      | 3108 | 0 | s01 |
| .....cgggucgAaguuagcucaagcgg.....      | 2    | 1 | s01 |
| .....cgggucggaguuAaAcaagcgg.....       | 1    | 1 | s01 |
| .....cgggucggagLuagcucaagcgg.....      | 2    | 1 | s01 |
| .....cgggucggCguuagcucaagcgg.....      | 1    | 1 | s01 |
| .....cggguUggaguuagcucaagcgg.....      | 1    | 1 | s01 |
| .....cgggucggaguuagcuUaagcgg.....      | 4    | 1 | s01 |
| .....cggCucggaguuagcucaagcgg.....      | 3    | 1 | s01 |

cuaccgggucgggaguuagcuaagcgguuaccuccuacugcgggacuuucuaucuguccaucucugcugggguucgagaccgcgggugcuuacugaccuuuuuag

|                                           |     |   |     |
|-------------------------------------------|-----|---|-----|
| .....cAgggucgggaguuagcuaagcgggu.....      | 2   | 1 | s01 |
| .....cgggucgggaguuUgcuaagcgggu.....       | 1   | 1 | s01 |
| .....cggguUggaguuagcuaagcgggu.....        | 1   | 1 | s01 |
| .....cgggucgggaguuagcuaagcgggu.....       | 262 | 0 | s01 |
| .....Agggucgggaguuagcuaagcgggu.....       | 1   | 1 | s01 |
| .....cgggucgggaguuagcuaagcgggu.....       | 1   | 1 | s01 |
| .....cgCgucgggaguuagcuaagcgggu.....       | 1   | 1 | s01 |
| .....cgggucgggagCuaagcuaagcgggu.....      | 1   | 1 | s01 |
| .....cgggGcgggaguuagcuaagcgggu.....       | 17  | 1 | s01 |
| .....cgggucgggaguuagcuaaUcgggu.....       | 1   | 1 | s01 |
| .....cgggucgggaguuagUucaagcgggu.....      | 1   | 1 | s01 |
| .....cgggucgggaguuagcuaagcggCu.....       | 1   | 1 | s01 |
| .....Ggggucgggaguuagcuaagcgggu.....       | 38  | 1 | s01 |
| .....cgggucgggagGuaagcuaagcgggu.....      | 1   | 1 | s01 |
| .....cCggucgggaguuagcuaagcgggu.....       | 1   | 1 | s01 |
| .....cgggucgggaguuagcuaagcggguC.....      | 1   | 1 | s01 |
| .....cgggCcgggaguuagcuaagcgggu.....       | 1   | 1 | s01 |
| .....cgggucgggaguuagcucUagcgggu.....      | 1   | 1 | s01 |
| .....cggUucgggaguuagcuaagcgggu.....       | 1   | 1 | s01 |
| .....cgggucgggaguuagcuaagcggguG.....      | 1   | 1 | s01 |
| .....Ugggucgggaguuagcuaagcgggu.....       | 3   | 1 | s01 |
| .....cgggucgggaguuagcuaagcggguA.....      | 170 | 1 | s01 |
| .....cgggAcgggaguuagcuaagcgggu.....       | 1   | 1 | s01 |
| .....cgggucgggaguuagcuaagcggguU.....      | 1   | 1 | s01 |
| .....cgggucgggaguuUgcuaagcgggu.....       | 1   | 1 | s01 |
| .....cgggucgggaguCagcuaagcgggu.....       | 1   | 1 | s01 |
| .....cgggucgggaguuagcuaagcggguA.....      | 5   | 1 | s01 |
| .....cgggGcgggaguuagcuaagcggguuA.....     | 3   | 1 | s01 |
| .....GgggucgggaguuagcuaagcggguuA.....     | 4   | 1 | s01 |
| .....cgggCcgggaguuagcuaagcggguuA.....     | 1   | 1 | s01 |
| .....cgggucgggaguuagcuaagcggguAa.....     | 79  | 1 | s01 |
| .....cgggucgggaguuagcuaagcggCuA.....      | 1   | 1 | s01 |
| .....cgggucgggaguuagcuaagcggguuA.....     | 26  | 0 | s01 |
| .....cgggucgggaguuagcuaagcggguU.....      | 46  | 1 | s01 |
| .....cgggucgggaguuagcuaagcggguuAG.....    | 1   | 1 | s01 |
| .....cgggucgggaguuagcuaagcggguuac.....    | 4   | 0 | s01 |
| .....cgggucgggaguuagcuaagcggguuAA.....    | 4   | 1 | s01 |
| .....cgggucgggaguuagcuaagcggguuAU.....    | 4   | 1 | s01 |
| .....Ggggucgggaguuagcuaagcggguuac.....    | 1   | 1 | s01 |
| .....cgggucgggaguuagcuaagcggguuacc.....   | 5   | 0 | s01 |
| .....Ggggucgggaguuagcuaagcggguuacc.....   | 1   | 1 | s01 |
| .....cgggucgggaguuagcuaagcggguuacU.....   | 1   | 1 | s01 |
| .....cgggucgggaguuagcuaagcggguuaccU.....  | 2   | 0 | s01 |
| .....cgggucgggaguuagcuaagcggguuaccuc..... | 1   | 0 | s01 |
| .....gggGcgggaguuagcuaag.....             | 1   | 1 | s01 |
| .....gggucgggaguuagcuaag.....             | 4   | 0 | s01 |
| .....gggucgggaguuagcuaagc.....            | 68  | 0 | s01 |
| .....gggAcgggaguuagcuaagc.....            | 2   | 1 | s01 |
| .....gggucgggaguuagcAcaagc.....           | 1   | 1 | s01 |
| .....gggucgggagCuagcuaagc.....            | 1   | 1 | s01 |
| .....gggGcgggaguuagcuaagc.....            | 3   | 1 | s01 |
| .....gggucgggaguuagcuaagcgg.....          | 13  | 0 | s01 |
| .....gggGcgggaguuagcuaagcgg.....          | 1   | 1 | s01 |
| .....gggucgggGuuagcuaagcgg.....           | 1   | 1 | s01 |
| .....gggucgggaguuagcuaagcgg.....          | 252 | 0 | s01 |
| .....Cggucgggaguuagcuaagcgg.....          | 2   | 1 | s01 |
| .....ggguGggaguuagcuaagcgg.....           | 1   | 1 | s01 |
| .....gggucgggaguuagcuaagcUg.....          | 1   | 1 | s01 |
| .....gggucgggaguuagcuaagcUg.....          | 4   | 1 | s01 |
| .....gggAcgggaguuagcuaagcgg.....          | 1   | 1 | s01 |
| .....gggucgggaguuagcuaagcgg.....          | 3   | 1 | s01 |
| .....gggucgggagGagcuaagcgg.....           | 2   | 1 | s01 |
| .....gggCcgggaguuagcuaagcgg.....          | 1   | 1 | s01 |
| .....gggGcgggaguuagcuaagcgg.....          | 8   | 1 | s01 |
| .....gggucgggagGuaagcuaagcgg.....         | 1   | 1 | s01 |
| .....ggguAggaguuagcuaagcgg.....           | 1   | 1 | s01 |
| .....gggucgggaguuACcuaagcgg.....          | 1   | 1 | s01 |
| .....gggucgggaguuagcuaagcUg.....          | 34  | 1 | s01 |
| .....gggucgggaguuagcucUagcgg.....         | 5   | 1 | s01 |



cuaccgggucgggaguuagcucaagcgguuaccuccuacugcggacuuucuaucuguccaucucugugcgggguuucgagaccgcgggugcuuacugaccuuuuuag

|                                     |      |   |     |
|-------------------------------------|------|---|-----|
| .....gggAcggaguuagcucaagcggg.....   | 8    | 1 | s01 |
| .....gggucggauuuagcucaagcggg.....   | 2    | 1 | s01 |
| .....Aggucggaguuagcucaagcggg.....   | 1    | 1 | s01 |
| .....Uggucggaguuagcucaagcggg.....   | 1    | 1 | s01 |
| .....gUgucggaguuagcucaagcggg.....   | 3    | 1 | s01 |
| .....gggucggagCuagcucaagcggg.....   | 2    | 1 | s01 |
| .....ggCucggaguuagcucaagcggg.....   | 1    | 1 | s01 |
| .....gggCcgaguuagcucaagcggg.....    | 17   | 1 | s01 |
| .....gggGcggaguuagcucaagcggg.....   | 185  | 1 | s01 |
| .....ggguAggaguuagcucaagcggg.....   | 9    | 1 | s01 |
| .....gggucggaguuagcGcaagcggg.....   | 11   | 1 | s01 |
| .....gggucggaguuagUucaagcggg.....   | 5    | 1 | s01 |
| .....gggucggagUcagcucaagcggg.....   | 1    | 1 | s01 |
| .....gAgucggaguuagcucaagcggg.....   | 1    | 1 | s01 |
| .....gggucggagUuagcucaagcggg.....   | 14   | 1 | s01 |
| .....gggucggaguuagcucaagcggC.....   | 22   | 1 | s01 |
| .....gggucggagUGagcucaagcggg.....   | 6    | 1 | s01 |
| .....gggucggaguuagcCcaagcggg.....   | 1    | 1 | s01 |
| .....gggucggaguuagcuGaaagcggg.....  | 1    | 1 | s01 |
| .....gggucggauuuagcucaagcggg.....   | 4    | 1 | s01 |
| .....ggUucggaguuagcucaagcggg.....   | 4    | 1 | s01 |
| .....gggucggaguuagcucaaaagcggg..... | 1    | 1 | s01 |
| .....gggucggaguuagcucaagcggg.....   | 3752 | 0 | s01 |
| .....gggucggagAuaagcucaagcggg.....  | 3    | 1 | s01 |
| .....gggucggaguuagcucaagAggu.....   | 2    | 1 | s01 |
| .....gggucggaguuGgcucaagcggg.....   | 1    | 1 | s01 |
| .....gggucggaguuagcucaagcgcCu.....  | 1    | 1 | s01 |
| .....gggucggaguuagcuUaagcggg.....   | 5    | 1 | s01 |
| .....gggucggaguuagcucaagcgggA.....  | 7    | 1 | s01 |
| .....gggucggaguuUcuaagcggg.....     | 1    | 1 | s01 |
| .....gggucggaguuagcucaaCcggu.....   | 2    | 1 | s01 |
| .....ggguUggaguuagcucaagcggg.....   | 1    | 1 | s01 |
| .....gggucggaguuagcucaagUggu.....   | 1    | 1 | s01 |
| .....gggucggaguuagcucaagcUgu.....   | 17   | 1 | s01 |
| .....gggucggaguuagcuAaagcggg.....   | 3    | 1 | s01 |
| .....gggucgggUguuagcucaagcggg.....  | 1    | 1 | s01 |
| .....gggucggaguuagcucCagcggg.....   | 2    | 1 | s01 |
| .....Cggucggaguuagcucaagcggg.....   | 7    | 1 | s01 |
| .....gggucggaguuagcucaUgcggg.....   | 2    | 1 | s01 |
| .....gggucggaguuagcucGagcggg.....   | 2    | 1 | s01 |
| .....gggucggaguuagcucaagcAgu.....   | 1    | 1 | s01 |
| .....gggucggaguuagcucaagcggG.....   | 15   | 1 | s01 |
| .....ggguGggaguuagcucaagcggg.....   | 3    | 1 | s01 |
| .....gggucggGguuagcucaagcggg.....   | 3    | 1 | s01 |
| .....gCgucggaguuagcucaagcggg.....   | 3    | 1 | s01 |
| .....gggucggaguuagcucaaUcggu.....   | 3    | 1 | s01 |
| .....gggucggaguuagAucaagcggg.....   | 1    | 1 | s01 |
| .....gggucggagCuagcucaagcgggu.....  | 4    | 1 | s01 |
| .....gggucggaguuagUucaagcgggu.....  | 2    | 1 | s01 |
| .....gggucggaguuagcucaagcggUuu..... | 9    | 1 | s01 |
| .....Uggucggaguuagcucaagcgggu.....  | 1    | 1 | s01 |
| .....gggucUgaguuagcucaagcgggu.....  | 1    | 1 | s01 |
| .....gggucggaguuGgcucaagcgggu.....  | 1    | 1 | s01 |
| .....gggucggaguuagcucaagcggG.....   | 6    | 1 | s01 |
| .....gggucggaguuagcucaagcgggu.....  | 1148 | 0 | s01 |
| .....gggucggaguuagcucaagcggCu.....  | 5    | 1 | s01 |
| .....gggAcggaguuagcucaagcgggu.....  | 1    | 1 | s01 |
| .....gggucggaguuagcucaagcgggA.....  | 32   | 1 | s01 |
| .....gggGcggaguuagcucaagcgggu.....  | 68   | 1 | s01 |
| .....gggucgAaguuagcucaagcgggu.....  | 1    | 1 | s01 |
| .....gggCcgaguuagcucaagcgggu.....   | 4    | 1 | s01 |
| .....gggucgCaguagcucaagcgggu.....   | 1    | 1 | s01 |
| .....gggucggagUuagcucaagcgggu.....  | 3    | 1 | s01 |
| .....gggucggaguuUcuaagcgggu.....    | 1    | 1 | s01 |
| .....gUgucggaguuagcucaagcgggu.....  | 1    | 1 | s01 |
| .....ggAucggaguuagcucaagcgggu.....  | 1    | 1 | s01 |
| .....gggucggagUGagcucaagcgggu.....  | 1    | 1 | s01 |
| .....gggucggaguuagcucaaCcggu.....   | 1    | 1 | s01 |
| .....gggucggaguuagcucUagcgggu.....  | 2    | 1 | s01 |

cuaccgggucgggaguuagcucaagcgguuuaccuccuacugcgggacuuucuaucuguccaucucugucgggguuucgagaccgcggggugcuuacugaccuuuuuug

|                                          |     |   |     |
|------------------------------------------|-----|---|-----|
| .....gggucgggaguuagcucaagUgguu.....      | 1   | 1 | s01 |
| .....gggucgggaguuagcucaagcgguu.....      | 1   | 1 | s01 |
| .....gggucgggaguuagcucaagGgguu.....      | 1   | 1 | s01 |
| .....Cggucgggaguuagcucaagcgguu.....      | 6   | 1 | s01 |
| .....gggucgggGuuagcucaagcgguu.....       | 2   | 1 | s01 |
| .....gggucgggaguuagcGcaagcgguu.....      | 3   | 1 | s01 |
| .....gggucgggaguuagcucaaaLcgguu.....     | 1   | 1 | s01 |
| .....gCgucgggaguuagcucaagcgguu.....      | 1   | 1 | s01 |
| .....gggucgggaguuCagcucaagcgguu.....     | 1   | 1 | s01 |
| .....gggucAgaguuagcucaagcgguu.....       | 1   | 1 | s01 |
| .....gggucgggaguuagcucaagcUguu.....      | 5   | 1 | s01 |
| .....gggucAggaguuagcucaagcgguu.....      | 2   | 1 | s01 |
| .....gggucgggaguuagcucaGgcgguu.....      | 1   | 1 | s01 |
| .....gggucgggaguuagcucaagcgguG.....      | 1   | 1 | s01 |
| .....gggucgggaguuagcuUaagcgguu.....      | 1   | 1 | s01 |
| .....gggucgggaguuagcucaCgcgguu.....      | 1   | 1 | s01 |
| .....gggucgggUuuagcucaagcgguu.....       | 1   | 1 | s01 |
| .....gggucgggUuuagcucaagcgguu.....       | 1   | 1 | s01 |
| .....gggucgggaguuagcucaagcgguC.....      | 1   | 1 | s01 |
| .....gggucgggUuuagcucaagcgguuu.....      | 1   | 1 | s01 |
| .....gggucgggaguuagcucaagcgguGa.....     | 1   | 1 | s01 |
| .....gggCcgaguuagcucaagcgguuu.....       | 1   | 1 | s01 |
| .....gggGcggaguuagcucaagcgguuu.....      | 15  | 1 | s01 |
| .....gggucgggaguuagcucaagcgguuu.....     | 171 | 0 | s01 |
| .....gggucgggaguuagcucaagcgguuAa.....    | 5   | 1 | s01 |
| .....gggucgggaguuagUucaagcgguuu.....     | 1   | 1 | s01 |
| .....gggucgggaguuagcucaagcgguuAa.....    | 1   | 1 | s01 |
| .....gggucgggaguuagcucaagcgguuU.....     | 21  | 1 | s01 |
| .....gggucgggaguuagcucaagcUguuu.....     | 1   | 1 | s01 |
| .....gggucgggaguuagcGcaagcgguuac.....    | 1   | 1 | s01 |
| .....gggucgggaguuagcucaagcgguuU.....     | 3   | 1 | s01 |
| .....gggucgggGuaagcucaagcgguuac.....     | 1   | 1 | s01 |
| .....gggucgggaguuagcuUaagcgguuac.....    | 1   | 1 | s01 |
| .....gggucgggaguuagcucaagcgguuac.....    | 43  | 0 | s01 |
| .....gggGcggaguuagcucaagcgguuac.....     | 6   | 1 | s01 |
| .....gggucAggaguuagcucaagcgguuac.....    | 1   | 1 | s01 |
| .....gggucgggaguuagcucaagcUguuac.....    | 1   | 1 | s01 |
| .....ggAucggaguuagcucaagcgguuacc.....    | 1   | 1 | s01 |
| .....gggucgggaguuagcucaagcgguuUcc.....   | 1   | 1 | s01 |
| .....gggucgggaguuagcucaagcgguuUc.....    | 1   | 1 | s01 |
| .....gggucgggaguuagcucUagcgguuacc.....   | 1   | 1 | s01 |
| .....gggucgggaguuagcucaagcgguuacc.....   | 74  | 0 | s01 |
| .....gggGcggaguuagcucaagcgguuacc.....    | 4   | 1 | s01 |
| .....gggCcgaguuagcucaagcgguuacc.....     | 1   | 1 | s01 |
| .....gggucgggaguuagcucaUgcgguuacc.....   | 1   | 1 | s01 |
| .....gggucgggaguuagcucaagcgguuaccu.....  | 26  | 0 | s01 |
| .....gggucgggaguuagcucaagcggUuuaccu..... | 1   | 1 | s01 |
| .....gggucgggaguuagcucaagcggCuaccu.....  | 1   | 1 | s01 |
| .....gggucgggaguuagcucaagcgguuUccuc..... | 1   | 1 | s01 |
| .....gggucgggaguuagcucaagcgguuaccuc..... | 6   | 0 | s01 |
| .....Cgucgggaguuagcucaagcgg.....         | 1   | 1 | s01 |
| .....ggucgggaguuagcucaagcgg.....         | 4   | 0 | s01 |
| .....Cgucgggaguuagcucaagcgg.....         | 1   | 1 | s01 |
| .....ggucgggaguuagcucaagcgguu.....       | 1   | 0 | s01 |
| .....ggucgggaguuagcucaagcgguuu.....      | 2   | 0 | s01 |
| .....gucgggaguuagcucaagcgg.....          | 1   | 0 | s01 |
| .....agcucaagcgguuaccuccuagcgg.....      | 1   | 0 | s01 |
| .....gcucaagcgguuaccucc.....             | 1   | 0 | s01 |
| .....gugguuaccuccuagcggacu.....          | 1   | 0 | s01 |
| .....cgguuaccuccuagcggacuuc.....         | 1   | 0 | s01 |
| .....uaccuccuagcggacu.....               | 1   | 0 | s01 |
| .....uaccuccuagcggacu.....               | 1   | 0 | s01 |
| .....uaccuccuagcggacu.....               | 1   | 0 | s01 |
| .....uaccuccuagcggacu.....               | 1   | 0 | s01 |
| .....uaccuccuagcggacu.....               | 6   | 0 | s01 |
| .....uaccuccuagcggacuucua.....           | 2   | 0 | s01 |
| .....accuccuagcggacu.....                | 1   | 1 | s01 |
| .....accuccuagcggacu.....                | 1   | 0 | s01 |
| .....accuccuagcggacuucua.....            | 1   | 0 | s01 |
| .....uccuagcggacuucua.....               | 1   | 1 | s01 |

cuaccgggucggaguuagcucaagcgguuaccuccuacugcgggacuuucuaucuguccaucugugcgggguuucgagaccgcgggugcuuacugaccuuuuuug

|                                       |    |   |     |
|---------------------------------------|----|---|-----|
| .....caugccggacuucuaucu.....          | 1  | 0 | s01 |
| .....ucugugcgggguuucgagacc.....       | 1  | 0 | s01 |
| .....cugugcgggguuucgagac.....         | 1  | 0 | s01 |
| .....ugugcgggguuucgagac.....          | 1  | 0 | s01 |
| .....gagaccgcgggugcuuacugaccuuuu... . | 1  | 0 | s01 |
| .....gaccgcgggugcuuacugaccuuuuU..     | 1  | 1 | s01 |
| .....ccgcgggugcuuacugaccuuuu... .     | 1  | 0 | s01 |
| .....cgcgggugcuuacugaccuu... .        | 2  | 0 | s01 |
| .....cgcggguuUcuuacugaccuu... .       | 1  | 1 | s01 |
| .....cgcgggCgcuuacugaccuu... .        | 1  | 1 | s01 |
| .....cgcgggugcuuacugaccuu... .        | 64 | 0 | s01 |
| .....cgcgggugcuuacugaccuuA... .       | 1  | 1 | s01 |
| .....cgcgggugcuuacugaccuuUcuu... .    | 1  | 1 | s01 |
| .....cgcgggugcuuUugaccuu... .         | 1  | 1 | s01 |
| .....cgcgguUgcuuacugaccuu... .        | 1  | 1 | s01 |
| .....cgcgggugcuuacugaccuuuu... .      | 63 | 0 | s01 |
| .....cgcgggugcuuacugaccuuuu... .      | 1  | 1 | s01 |
| .....cgcgggugcuuacugaccuuuu... .      | 2  | 1 | s01 |
| .....cgcgggugcuuacugaccuuuu... .      | 1  | 1 | s01 |
| .....cgcgggugcuuacugaccuuuu... .      | 1  | 1 | s01 |
| .....cgcgggugcuuacugaccuuuu... .      | 1  | 0 | s01 |
| .....cgcgggugcuuacugaccuuuuA... .     | 2  | 1 | s01 |
| .....gcgggugcuuacugaccuuuu... .       | 1  | 0 | s01 |
| .....cgggugcuuacugaccuuuu... .        | 1  | 0 | s01 |
| .....cgggucggaguuagcucaagcgggu... .   | 1  | 0 | U20 |
| .....gguuucgagaccgcgggugcuuU... .     | 1  | 1 | U20 |
| .....accgggucggaguuagcucaagcgggu... . | 2  | 0 | ku2 |
| .....cccgggucggaguuagcucaagcggg... .  | 1  | 0 | ku2 |
| .....cccgggucggaguuagcucaagcgggu... . | 4  | 0 | ku2 |
| .....ccgggucggaguuagcucaagcgg... .    | 1  | 0 | ku2 |
| .....ccgggucggaguuagcucaagcggg... .   | 1  | 1 | ku2 |
| .....ccgggucggaguuagcucaagcggg... .   | 14 | 0 | ku2 |
| .....ccgggGcggaguuagcucaagcggg... .   | 1  | 1 | ku2 |
| .....ccgggucggaguuagcucaagcggCg... .  | 1  | 1 | ku2 |
| .....ccgggucggaguuagcucaagcggA... .   | 1  | 1 | ku2 |
| .....ccgggucggaguuagcucaagcggG... .   | 1  | 1 | ku2 |
| .....ccgggucggaguuagcucaagcgggu... .  | 1  | 1 | ku2 |
| .....ccgggucggaguuagcucaagcggCu... .  | 1  | 1 | ku2 |
| .....ccgggucggaguuagcucaagcggC... .   | 1  | 1 | ku2 |
| .....ccgggucggaguuagcucaagcggg... .   | 3  | 1 | ku2 |
| .....ccgggucggaguuagcucaagcgggu... .  | 14 | 0 | ku2 |
| .....ccgggucggaguuagcucaagcgggA... .  | 2  | 1 | ku2 |
| .....ccgggCcgaguuagcucaagcgggu... .   | 1  | 1 | ku2 |
| .....ccgggucggaguuagcucaagcgggu... .  | 5  | 0 | ku2 |
| .....ccgggucggaguuagcucaagcggguA... . | 2  | 1 | ku2 |
| .....ccgggucggaguuagcucaagcgggu... .  | 1  | 1 | ku2 |
| .....ccgggucggaguuagcucaagcggguu... . | 2  | 0 | ku2 |
| .....ccgggucggaguuagcucaagcggguA... . | 3  | 1 | ku2 |
| .....ccgggucggaguuagcucaagcgggu... .  | 1  | 1 | ku2 |
| .....ccgggucggaguuagcucaagcgggu... .  | 1  | 0 | ku2 |
| .....ccgggucggaguuagcucaagcgggu... .  | 1  | 1 | ku2 |
| .....ccgggucggaguuagcucaagcggg... .   | 19 | 0 | ku2 |
| .....ccgggGcggaguuagcucaagcgg... .    | 1  | 1 | ku2 |
| .....ccgggucggaguuagcucaagcggA... .   | 3  | 1 | ku2 |
| .....ccgggucggaguuagcucaagcggg... .   | 2  | 1 | ku2 |
| .....ccgggucggaguuagcucaagcggg... .   | 5  | 1 | ku2 |
| .....ccgggucAgaguuagcucaagcggg... .   | 1  | 1 | ku2 |
| .....ccgggucggaguuagcucaagcggU... .   | 2  | 1 | ku2 |
| .....ccgggucggaguuagcucaagcggg... .   | 1  | 1 | ku2 |
| .....ccgggucggaguuagcucaagcggg... .   | 1  | 1 | ku2 |
| .....ccgggGcggaguuagcucaagcggg... .   | 2  | 1 | ku2 |
| .....Agggucggaguuagcucaagcggg... .    | 1  | 1 | ku2 |
| .....ccgggucggaguuagcucaagcggg... .   | 1  | 1 | ku2 |
| .....ccgggucggaguuagcucaagcggC... .   | 3  | 1 | ku2 |
| .....ccgggucggaguuagcucaagcggg... .   | 1  | 1 | ku2 |

cuaccgggucgggaguuagcucaagcgguuaccuccuacugcgggacuuucuaucuguccaucucugugcgggguuucgagaccgcgggugcuuacugaccuuuuuag

|                                        |     |   |     |
|----------------------------------------|-----|---|-----|
| .....cgggucgggaguuagcucaagcggg.....    | 315 | 0 | ku2 |
| .....cgggucgggaguuGgcucaagcggg.....    | 1   | 1 | ku2 |
| .....cgggucgggaguuagcGcaagcggg.....    | 1   | 1 | ku2 |
| .....cgggucgggaguuagcCcaagcggg.....    | 2   | 1 | ku2 |
| .....cgggucgggaguuagcucGagcggg.....    | 1   | 1 | ku2 |
| .....cggCucgggaguuagcucaagcggg.....    | 1   | 1 | ku2 |
| .....cgggCcgggaguuagcucaagcggg.....    | 2   | 1 | ku2 |
| .....cgggucgggaguuagcucaaUcggg.....    | 1   | 1 | ku2 |
| .....cgggucgggaguuagcucCagcggg.....    | 2   | 1 | ku2 |
| .....cgggucgggaguuagcucaagcCg.....     | 1   | 1 | ku2 |
| .....cgggAcgggaguuagcucaagcggg.....    | 1   | 1 | ku2 |
| .....cgggucgggaguuagcucaagcCgCu.....   | 1   | 1 | ku2 |
| .....cgggucgggaguuagcAuaagcggg.....    | 1   | 1 | ku2 |
| .....cgggucgggaguuagcucaaUcggg.....    | 3   | 1 | ku2 |
| .....cgggucgggaguuacCucaagcggg.....    | 2   | 1 | ku2 |
| .....cgggucCgaguuagcucaagcggg.....     | 1   | 1 | ku2 |
| .....cgggucgggaguuagcucaagcggg.....    | 692 | 0 | ku2 |
| .....cgggucgggaguuagcucaGgcggg.....    | 2   | 1 | ku2 |
| .....cgggGcgggaguuagcucaagcggg.....    | 4   | 1 | ku2 |
| .....cgggucgggaguuagcucaCgcggg.....    | 3   | 1 | ku2 |
| .....cgggucgggaguuagcucaagcgggA.....   | 25  | 1 | ku2 |
| .....cgggucgggaguuagcucaagcgggG.....   | 29  | 1 | ku2 |
| .....cgggucgggagGuaagcucaagcggg.....   | 3   | 1 | ku2 |
| .....cCgggucgggaguuagcucaagcggg.....   | 1   | 1 | ku2 |
| .....cgggucgggaguuagcucCagcggg.....    | 5   | 1 | ku2 |
| .....cgggucgggCguuagcucaagcggg.....    | 1   | 1 | ku2 |
| .....cgggCcgggaguuagcucaagcggg.....    | 1   | 1 | ku2 |
| .....cgggucgggaguuagcucaagAggg.....    | 1   | 1 | ku2 |
| .....cgggucgggagCuagcucaagcggg.....    | 2   | 1 | ku2 |
| .....cgggucgggagCuagcucaagcggg.....    | 1   | 1 | ku2 |
| .....cgggucgggaguuagcCcaagcggg.....    | 2   | 1 | ku2 |
| .....cgggucgCaguuagcucaagcggg.....     | 1   | 1 | ku2 |
| .....cgggucgggaguuagcucaaCcggu.....    | 1   | 1 | ku2 |
| .....cgAgucgggaguuagcucaagcggg.....    | 1   | 1 | ku2 |
| .....cgggucgggaguuCgcucaagcggg.....    | 1   | 1 | ku2 |
| .....cgggucgggaguuagcuAaagcggg.....    | 3   | 1 | ku2 |
| .....cgggucgggaguuagcucaagcCgu.....    | 3   | 1 | ku2 |
| .....cgggucgggaguuagcucaagcgggC.....   | 14  | 1 | ku2 |
| .....cgggucgggaguuagcucaagUggg.....    | 1   | 1 | ku2 |
| .....cgggucgggaguuagcucaagcggg.....    | 1   | 1 | ku2 |
| .....cgggucgggaguuagcucaagcgggC.....   | 1   | 1 | ku2 |
| .....cgggucgggaguuagcucaagcgggu.....   | 126 | 0 | ku2 |
| .....cgggucgggaguuagcucaagAggguu.....  | 1   | 1 | ku2 |
| .....cgggucgggaguuagcucaagcgggA.....   | 81  | 1 | ku2 |
| .....cgggGcgggaguuagcucaagcgggu.....   | 3   | 1 | ku2 |
| .....cgggucgggaguuagcucaCgcgggu.....   | 1   | 1 | ku2 |
| .....cgggucgggaguuagcucaagcgggA.....   | 6   | 1 | ku2 |
| .....cgggucgggaguuagcucaagcCgu.....    | 1   | 1 | ku2 |
| .....cgggucgggagGuaagcucaagcgggu.....  | 1   | 1 | ku2 |
| .....cgggucgggaguuagcCcaagcgggu.....   | 2   | 1 | ku2 |
| .....cgggucgggaguuagcucaagcgggG.....   | 3   | 1 | ku2 |
| .....cgggucgggaguuagcucaagcgggU.....   | 9   | 1 | ku2 |
| .....cgggCcgggaguuagcucaagcgggu.....   | 1   | 1 | ku2 |
| .....cgggucgggaguuagcucaagcgggCu.....  | 3   | 1 | ku2 |
| .....Agggucgggaguuagcucaagcgggu.....   | 1   | 1 | ku2 |
| .....cgggucgggaguuagcucaagcCgu.....    | 1   | 1 | ku2 |
| .....cgggucgggaguuagcucaagcgggCua..... | 2   | 1 | ku2 |
| .....cgggucgggaguuagcucaagcgggGua..... | 3   | 1 | ku2 |
| .....cgggucgggaguuagcucaagcgggAa.....  | 29  | 1 | ku2 |
| .....cgggucgggaguuagcucaagcgggGa.....  | 2   | 1 | ku2 |
| .....cgggucgggaguuagcucaagcggguU.....  | 37  | 1 | ku2 |
| .....cgggucgggaguuagcucaagcggguG.....  | 1   | 1 | ku2 |
| .....cgggucgggaguuagcucaagcggguu.....  | 14  | 0 | ku2 |
| .....cgggucgggaguuagcucaagcggguaa..... | 5   | 1 | ku2 |
| .....gggucgggaguuagcucCagcggg.....     | 1   | 1 | ku2 |
| .....gggucgggaguuagcucaagcggg.....     | 65  | 0 | ku2 |
| .....gggucgggaguuagcucaCgcggg.....     | 1   | 1 | ku2 |
| .....gggucgggaguuagcCcaagcggg.....     | 1   | 1 | ku2 |
| .....gggucgggaguuagcucCagcggg.....     | 8   | 1 | ku2 |

cuaccgggucggaguuagcucaagcgguuaccuccuacugcggacuucuaucuguccaucucugucgggguuucgagaccgcgggugcuuacugaccuuuuuag

|                                       |     |   |     |
|---------------------------------------|-----|---|-----|
| .....gggGcggaguuagcucaagcggg.....     | 1   | 1 | ku2 |
| .....gggucggaguuagcAcaagcggg.....     | 1   | 1 | ku2 |
| .....gggucggaguuagcucaagcggG.....     | 17  | 1 | ku2 |
| .....gggucggaguuagcucUagcggg.....     | 1   | 1 | ku2 |
| .....gggucggaguuagcucaagcCGu.....     | 1   | 1 | ku2 |
| .....gggucggaguuagcucaagcCGu.....     | 2   | 1 | ku2 |
| .....gggucggagucCagcucaagcggg.....    | 1   | 1 | ku2 |
| .....gggucggaguuagcucaagcggA.....     | 13  | 1 | ku2 |
| .....gggucggaguuagAuaagcggg.....      | 1   | 1 | ku2 |
| .....gggCcgaguuagcucaagcggg.....      | 2   | 1 | ku2 |
| .....gggucggagGuaagcucaagcggg.....    | 1   | 1 | ku2 |
| .....gggucggaguuagcucaagcggg.....     | 269 | 0 | ku2 |
| .....gggucggaguuagcucaagcggC.....     | 10  | 1 | ku2 |
| .....gggucggagucGagcucaagcggg.....    | 1   | 1 | ku2 |
| .....gggucggaguuagcucaagcggCu.....    | 1   | 1 | ku2 |
| .....gggucggaguuagcucaagcgggu.....    | 14  | 0 | ku2 |
| .....gggucggaguuagcucaagcgggA.....    | 48  | 1 | ku2 |
| .....gggucggaguuagcucaagcgggC.....    | 2   | 1 | ku2 |
| .....gggucggaguuagcucaagcggGu.....    | 1   | 1 | ku2 |
| .....gggucggaguuagcucCagcggguua.....  | 1   | 1 | ku2 |
| .....gggucggaguuagcucaagcgggAa.....   | 10  | 1 | ku2 |
| .....gggucggaguuagcucaagcggGu.....    | 1   | 1 | ku2 |
| .....gggucggaguuagcucaagcggguua.....  | 10  | 0 | ku2 |
| .....gggucggaguuagcucaagcggguU.....   | 20  | 1 | ku2 |
| .....gggucggaguuagcucaagcggguC.....   | 1   | 1 | ku2 |
| .....gggucggagAuaagcucaagcggguua..... | 1   | 1 | ku2 |
| .....gggucggaguuagcucaagcggguuac..... | 2   | 0 | ku2 |
| .....gggucggaguuagcucaagcggguuaA..... | 3   | 1 | ku2 |
| .....cggaguuagcucaagcggguAa.....      | 1   | 1 | ku2 |
| .....uaccuccuacugcgggacu.....         | 1   | 0 | ku2 |
| .....uaccuccGcaugcgggacuuu.....       | 1   | 1 | ku2 |
| .....cgcgggugcuuacugaccuuA.....       | 5   | 1 | ku2 |
| .....cgcgggugcuuacugaAccuu.....       | 1   | 1 | ku2 |
| .....cgcgggugcuuacCgaccuu.....        | 1   | 1 | ku2 |
| .....cgcgggugcuuacugaccuu.....        | 29  | 0 | ku2 |
| .....cgcgggugcuuacugaccuuu.....       | 9   | 0 | ku2 |
| .....cgcgggugcuuacugaccuuuA.....      | 2   | 1 | ku2 |
| .....accgggucggaguuagc.....           | 1   | 0 | j21 |
| .....accgggucggaguuagcu.....          | 1   | 0 | j21 |
| .....accgggucggaguuagcucaaa.....      | 1   | 0 | j21 |
| .....accgggucggaguuagcucaag.....      | 1   | 0 | j21 |
| .....accgggucggaguuagcucaagc.....     | 7   | 0 | j21 |
| .....accgggucggaguuuacCucaagc.....    | 1   | 1 | j21 |
| .....accgggucggaguuagcucaagcG.....    | 1   | 1 | j21 |
| .....accgggucggaguuagcucaagcA.....    | 1   | 1 | j21 |
| .....accgggucggaguuagcucaagcG.....    | 1   | 0 | j21 |
| .....accgggucggagGuaagcucaagcgg.....  | 1   | 1 | j21 |
| .....accgggucggaguuagcuUaagcgg.....   | 1   | 1 | j21 |
| .....accgggucggaguuagUucaagcgg.....   | 4   | 1 | j21 |
| .....accgggucggaguuagcucaagcGU.....   | 2   | 1 | j21 |
| .....accgggucggaguuagcucaagcgg.....   | 37  | 0 | j21 |
| .....accgggucgCaguuagcucaagcgg.....   | 1   | 1 | j21 |
| .....aaccgggucggaguuagcucaagcgg.....  | 1   | 1 | j21 |
| .....accgggucggaguuagcucaagcGA.....   | 1   | 1 | j21 |
| .....accgggucggaguuagAuaagcgg.....    | 1   | 1 | j21 |
| .....accgggucggaguuagcucaagcggg.....  | 1   | 1 | j21 |
| .....accgggucggaguuagcucaagcggg.....  | 62  | 0 | j21 |
| .....accgggucggaguuagcucaagcggg.....  | 1   | 1 | j21 |
| .....accgggucgUaguuagcucaagcggg.....  | 3   | 1 | j21 |
| .....accgggucggagCuagcucaagcggg.....  | 1   | 1 | j21 |
| .....accgggucggaguuagAuaagcggg.....   | 1   | 1 | j21 |
| .....accgggucggaguuagcucaagcggA.....  | 2   | 1 | j21 |
| .....accgggucggaguuagcucaagcggC.....  | 2   | 1 | j21 |
| .....accgggucggaguuagcucaagcggg.....  | 3   | 1 | j21 |
| .....accgggucggaguuagcucGagcgggu..... | 1   | 1 | j21 |
| .....accgggucggaguuagcucaagcgggu..... | 8   | 0 | j21 |
| .....accgggucggaguuagcucaagcggCu..... | 1   | 1 | j21 |

cuaccgggucggaguuagcucaagcgguuaccuccuacugcggacuuucuaucuguccaucucugucgggguuucgagaccgcgggugcuuacugaccuuuuug

|           |    |   |     |
|-----------|----|---|-----|
| . . . . . | 1  | 1 | j21 |
| . . . . . | 4  | 1 | j21 |
| . . . . . | 2  | 0 | j21 |
| . . . . . | 1  | 1 | j21 |
| . . . . . | 1  | 1 | j21 |
| . . . . . | 1  | 1 | j21 |
| . . . . . | 7  | 0 | j21 |
| . . . . . | 3  | 1 | j21 |
| . . . . . | 1  | 1 | j21 |
| . . . . . | 28 | 1 | j21 |
| . . . . . | 2  | 1 | j21 |
| . . . . . | 2  | 1 | j21 |
| . . . . . | 1  | 1 | j21 |
| . . . . . | 1  | 1 | j21 |
| . . . . . | 1  | 1 | j21 |
| . . . . . | 2  | 1 | j21 |
| . . . . . | 85 | 0 | j21 |
| . . . . . | 1  | 1 | j21 |
| . . . . . | 1  | 1 | j21 |
| . . . . . | 2  | 1 | j21 |
| . . . . . | 1  | 1 | j21 |
| . . . . . | 1  | 1 | j21 |
| . . . . . | 1  | 1 | j21 |
| . . . . . | 39 | 1 | j21 |
| . . . . . | 1  | 1 | j21 |
| . . . . . | 1  | 1 | j21 |
| . . . . . | 7  | 1 | j21 |
| . . . . . | 1  | 1 | j21 |
| . . . . . | 69 | 0 | j21 |
| . . . . . | 1  | 1 | j21 |
| . . . . . | 14 | 1 | j21 |
| . . . . . | 15 | 0 | j21 |
| . . . . . | 1  | 1 | j21 |
| . . . . . | 3  | 1 | j21 |
| . . . . . | 2  | 1 | j21 |
| . . . . . | 6  | 0 | j21 |
| . . . . . | 1  | 1 | j21 |
| . . . . . | 16 | 0 | j21 |
| . . . . . | 1  | 1 | j21 |
| . . . . . | 1  | 1 | j21 |
| . . . . . | 1  | 1 | j21 |
| . . . . . | 1  | 1 | j21 |
| . . . . . | 41 | 0 | j21 |
| . . . . . | 2  | 1 | j21 |
| . . . . . | 1  | 1 | j21 |
| . . . . . | 1  | 1 | j21 |
| . . . . . | 1  | 1 | j21 |
| . . . . . | 2  | 1 | j21 |
| . . . . . | 10 | 1 | j21 |
| . . . . . | 1  | 1 | j21 |
| . . . . . | 1  | 1 | j21 |
| . . . . . | 1  | 1 | j21 |
| . . . . . | 2  | 1 | j21 |
| . . . . . | 5  | 1 | j21 |
| . . . . . | 2  | 1 | j21 |
| . . . . . | 1  | 1 | j21 |
| . . . . . | 6  | 1 | j21 |
| . . . . . | 2  | 1 | j21 |
| . . . . . | 1  | 1 | j21 |
| . . . . . | 5  | 1 | j21 |
| . . . . . | 1  | 1 | j21 |
| . . . . . | 4  | 1 | j21 |
| . . . . . | 1  | 1 | j21 |
| . . . . . | 7  | 1 | j21 |
| . . . . . | 1  | 1 | j21 |
| . . . . . | 1  | 1 | j21 |
| . . . . . | 2  | 1 | j21 |
| . . . . . | 1  | 1 | j21 |

cuaccgggucggaguuagcucaagcgguuaccuccuacugcggacuucuaucuguccaucucugucgggguuucgagaccgcgggugcuuacugaccuuuuug

|                                     |     |   |     |
|-------------------------------------|-----|---|-----|
| ...ccgggucggaguuagcucaagcgaA.....   | 6   | 1 | j21 |
| ...ccgggucggaguuagcucaagUgg.....    | 1   | 1 | j21 |
| ...ccgggucggaguuagcucaaaCcg.....    | 1   | 1 | j21 |
| ...ccgggucggaguuCgcucaagcgg.....    | 1   | 1 | j21 |
| ...Acgggucggaguuagcucaagcgg.....    | 2   | 1 | j21 |
| ...ccgggGcggaguuagcucaagcgg.....    | 8   | 1 | j21 |
| ...ccggUucggaguuagcucaagcgg.....    | 1   | 1 | j21 |
| ...ccgggucggaguuUcucaagcgg.....     | 1   | 1 | j21 |
| ...ccgggucggaguuagcucaagcgg.....    | 571 | 0 | j21 |
| ...ccgggucggaAuuagcucaagcgg.....    | 1   | 1 | j21 |
| ...ccgggucggaguuagcucGagcgg.....    | 1   | 1 | j21 |
| ...ccgggucggGguagcucaagcgg.....     | 1   | 1 | j21 |
| ...ccgggucggaguuagcuGaaagcgg.....   | 2   | 1 | j21 |
| ...ccgggucggaguuagcucaCgcgg.....    | 2   | 1 | j21 |
| ...ccUggucggaguuagcucaagcgg.....    | 1   | 1 | j21 |
| ...ccgggucggaguuagcGcaagcgg.....    | 9   | 1 | j21 |
| ...ccgggucggaguuagcuUaagcgg.....    | 3   | 1 | j21 |
| ...ccgggucggaguuagcucaUgcgg.....    | 1   | 1 | j21 |
| ...ccAggucggaguuagcucaagcgg.....    | 1   | 1 | j21 |
| ...cAgggucggaguuagcucaagcgg.....    | 3   | 1 | j21 |
| ...ccgggucggaguuagcucaagcggC.....   | 9   | 1 | j21 |
| ...ccgggucggaguuagcucaagcCgu.....   | 2   | 1 | j21 |
| ...ccgggucggaguuagcucaaaCcg.....    | 2   | 1 | j21 |
| ...Ucgggucggaguuagcucaagcgg.....    | 6   | 1 | j21 |
| ...ccgggucggaguuGgcucaagcgg.....    | 1   | 1 | j21 |
| ...ccgggucggaguuagcucaagUgg.....    | 1   | 1 | j21 |
| ...ccgggucggaguuagcuUaagcgg.....    | 2   | 1 | j21 |
| ...Gcgggucggaguuagcucaagcgg.....    | 1   | 1 | j21 |
| ...ccgggucggagGuaagcucaagcgg.....   | 8   | 1 | j21 |
| ...ccgggucggaguuagUucaagcgg.....    | 3   | 1 | j21 |
| ...ccgggucUgaguuagcucaagcgg.....    | 1   | 1 | j21 |
| ...ccgggucggagCuagcucaagcgg.....    | 1   | 1 | j21 |
| ...ccgggucggaguuagcucaaUcgg.....    | 1   | 1 | j21 |
| ...ccgggucggaguuagcucaagcggA.....   | 32  | 1 | j21 |
| ...ccgggCcgaguuagcucaagcgg.....     | 11  | 1 | j21 |
| ...ccgggucggagAuaagcucaagcgg.....   | 1   | 1 | j21 |
| ...ccgggGcggaguuagcucaagcgg.....    | 30  | 1 | j21 |
| ...ccgggucggGguagcucaagcgg.....     | 1   | 1 | j21 |
| ...ccgggucggaguuAucucaagcgg.....    | 2   | 1 | j21 |
| ...ccgggucggaguuagcucaagAggu.....   | 2   | 1 | j21 |
| ...ccgggucggagUgagcucaagcgg.....    | 1   | 1 | j21 |
| ...ccgggucggaguuagcucaagcgaA.....   | 1   | 1 | j21 |
| ...Acgggucggaguuagcucaagcgg.....    | 3   | 1 | j21 |
| ...ccgggucggGguagcucaagcgg.....     | 5   | 1 | j21 |
| ...ccgggucggaguuagcCcaagcgg.....    | 1   | 1 | j21 |
| ...ccgggucggaguuagcucaagcgg.....    | 852 | 0 | j21 |
| ...ccgggucggUguagcucaagcgg.....     | 1   | 1 | j21 |
| ...cGgggucggaguuagcucaagcgg.....    | 3   | 1 | j21 |
| ...ccgggucggaguuagAuaagcgg.....     | 2   | 1 | j21 |
| ...ccgUgucggaguuagcucaagcgg.....    | 1   | 1 | j21 |
| ...ccggguUggaguuagcucaagcgg.....    | 1   | 1 | j21 |
| ...ccggCucggaguuagcucaagcgg.....    | 1   | 1 | j21 |
| ...ccgggucggaguuagcucaagcggG.....   | 27  | 1 | j21 |
| ...ccgggucggaguuagcucCagcgg.....    | 3   | 1 | j21 |
| ...ccgggucggaguuUcucaagcgg.....     | 4   | 1 | j21 |
| ...ccgggAcggaguuagcucaagcgg.....    | 4   | 1 | j21 |
| ...ccgggucggGguagcucaagcgguu.....   | 3   | 1 | j21 |
| ...ccgggucggaguuagcucaagcggCu.....  | 2   | 1 | j21 |
| ...ccgggucggaguuagcucaagcggA.....   | 3   | 1 | j21 |
| ...ccgggucggagUgagcucaagcgguu.....  | 1   | 1 | j21 |
| ...ccgggucggaguuagcuUaagcgguu.....  | 1   | 1 | j21 |
| ...ccgggucggagGuaagcucaagcgguu..... | 2   | 1 | j21 |
| ...Acgggucggaguuagcucaagcgguu.....  | 2   | 1 | j21 |
| ...ccgggucggaguuagcucaagcgguaA..... | 48  | 1 | j21 |
| ...ccgggucggaguuCgcucaagcgguu.....  | 1   | 1 | j21 |
| ...ccgggAcggaguuagcucaagcgguu.....  | 1   | 1 | j21 |
| ...cGgggucggaguuagcucaagcgguu.....  | 2   | 1 | j21 |
| ...ccgggucggaguuagcCcaagcgguu.....  | 1   | 1 | j21 |





cuaccgggucgggaguuagcucaagcgguuaccuccuacugcgggacuuucuaucuguccaucucugugcgggguuucgagaccgcggggugcuuacugaccuuuuuag

|                                     |      |   |     |
|-------------------------------------|------|---|-----|
| .....cgggCcgaguuagcucaagcg.....     | 12   | 1 | j21 |
| .....cgggucgggaguuagGucaagcg.....   | 1    | 1 | j21 |
| .....cgggGcggaguuagcucaagcg.....    | 29   | 1 | j21 |
| .....cgggucgggaguuagcucaCgcg.....   | 2    | 1 | j21 |
| .....cgggucgggUguuagcucaagcg.....   | 1    | 1 | j21 |
| .....cgggucgggaguuagcucaagcg.....   | 563  | 0 | j21 |
| .....cgggucgCaguuaagcucaagcgg.....  | 8    | 1 | j21 |
| .....cgggucgggaguuagcuLaagcgg.....  | 22   | 1 | j21 |
| .....cgggucgggaguuCagcucaagcgg..... | 9    | 1 | j21 |
| .....cgggucgggaguuagcucaagcgA.....  | 32   | 1 | j21 |
| .....cgggucgggaguuCgcucaagcgg.....  | 13   | 1 | j21 |
| .....cgggucgggaguuagUucaagcgg.....  | 11   | 1 | j21 |
| .....cgCgucgggaguuagcucaagcgg.....  | 12   | 1 | j21 |
| .....cgggucgggaguuagcucaagGgg.....  | 11   | 1 | j21 |
| .....cgggucgggaguuagcuCagcgg.....   | 47   | 1 | j21 |
| .....cgggucgggaguuagcucaagcgg.....  | 7    | 1 | j21 |
| .....Ugggucgggaguuagcucaagcgg.....  | 30   | 1 | j21 |
| .....cgggucgggaguuUcucaagcgg.....   | 12   | 1 | j21 |
| .....cgggucgggUguuagcucaagcgg.....  | 4    | 1 | j21 |
| .....cgggucgggaguuagcucUagcgg.....  | 4    | 1 | j21 |
| .....cgggucCgaguuagcucaagcgg.....   | 7    | 1 | j21 |
| .....cgggucgggaguuagcucaagcUg.....  | 9    | 1 | j21 |
| .....cgggucgggaguuAacucaagcgg.....  | 3    | 1 | j21 |
| .....cgggucgggagCuagcucaagcgg.....  | 33   | 1 | j21 |
| .....cCggucgggaguuagcucaagcgg.....  | 16   | 1 | j21 |
| .....Ggggucgggaguuagcucaagcgg.....  | 6    | 1 | j21 |
| .....cgggucgggaguuagcucaagcAg.....  | 2    | 1 | j21 |
| .....cggCucgggaguuagcucaagcgg.....  | 11   | 1 | j21 |
| .....cgggucgggaguuAccucaagcgg.....  | 14   | 1 | j21 |
| .....cgggucgAaguuagcucaagcgg.....   | 3    | 1 | j21 |
| .....cgggucgggaguuagcCcaagcgg.....  | 36   | 1 | j21 |
| .....cgggucgggaguuagcucaaCcg.....   | 20   | 1 | j21 |
| .....Agggucgggaguuagcucaagcgg.....  | 32   | 1 | j21 |
| .....cggguUggaguuagcucaagcgg.....   | 13   | 1 | j21 |
| .....cgggucgggAuuagcucaagcgg.....   | 7    | 1 | j21 |
| .....cgggucgggaguuagcucaUgcg.....   | 2    | 1 | j21 |
| .....cgggucgggaguuagcucaagAg.....   | 16   | 1 | j21 |
| .....cgggucgggagUuagcucaagcgg.....  | 119  | 1 | j21 |
| .....cggUucgggaguuagcucaagcgg.....  | 8    | 1 | j21 |
| .....cgggucgggUuuagcucaagcgg.....   | 14   | 1 | j21 |
| .....cgggucgggAuuagcucaagcgg.....   | 5    | 1 | j21 |
| .....cgggucgggaguuagcucaagcgU.....  | 61   | 1 | j21 |
| .....cgggucgggaguuAagcucaagcgg..... | 2    | 1 | j21 |
| .....cgggucgggCguuagcucaagcgg.....  | 21   | 1 | j21 |
| .....cgggucgggagUGagcucaagcgg.....  | 15   | 1 | j21 |
| .....cgggucgggaguuagLucaagcgg.....  | 29   | 1 | j21 |
| .....cAggucgggaguuagcucaagcgg.....  | 3    | 1 | j21 |
| .....cgggucgggaguuagcuGaagcgg.....  | 19   | 1 | j21 |
| .....cgggucgggaguuagcAcaagcgg.....  | 8    | 1 | j21 |
| .....cgggucgggaguuagcucGagcgg.....  | 5    | 1 | j21 |
| .....cggAucgggaguuagcucaagcgg.....  | 6    | 1 | j21 |
| .....cgggucgggaguuagcucaaUcgg.....  | 29   | 1 | j21 |
| .....cgggucgUaguuagcucaagcgg.....   | 7    | 1 | j21 |
| .....cgggucgggaguuagcucaagcgg.....  | 9352 | 0 | j21 |
| .....cgggucgggaguuUgcucaagcgg.....  | 2    | 1 | j21 |
| .....cgggucgggaguuagcuUaagcgg.....  | 26   | 1 | j21 |
| .....cgggucgggaguuagcucaagcgC.....  | 13   | 1 | j21 |
| .....cgggucgggaguuagcGcaagcgg.....  | 44   | 1 | j21 |
| .....cggguAggaguuagcucaagcgg.....   | 16   | 1 | j21 |
| .....cgggucgggaguuagcucaCgcg.....   | 17   | 1 | j21 |
| .....cgggGcggaguuagcucaagcgg.....   | 386  | 1 | j21 |
| .....cgggucgggaguuagcucaagUgg.....  | 17   | 1 | j21 |
| .....cgggUGggaguuagcucaagcgg.....   | 10   | 1 | j21 |
| .....cgggucgggaguuagGucaagcgg.....  | 9    | 1 | j21 |
| .....cgAgucgggaguuagcucaagcgg.....  | 4    | 1 | j21 |
| .....cgggucgggaguuagcucaagcCg.....  | 17   | 1 | j21 |
| .....cgggucgggaguuagcucaaAcgg.....  | 6    | 1 | j21 |
| .....cgggucgggAuuagcucaagcgg.....   | 7    | 1 | j21 |
| .....cgggucUgaguuagcucaagcgg.....   | 1    | 1 | j21 |

cuaccgggucgggaguuagcucaagcgguuaccucucuaugcggacuuucuaucuguccaucucugugcgggguuucgagaccgcgggugcuuacugaccuuuuuag

|                                     |       |   |     |
|-------------------------------------|-------|---|-----|
| .....cgggCcgaguuagcucaagcgg.....    | 141   | 1 | j21 |
| .....cgUgucgggaguuagcucaagcgg.....  | 1     | 1 | j21 |
| .....cgggAcggaguuagcucaagcgg.....   | 44    | 1 | j21 |
| .....cgggucgggaguuGgcucaagcgg.....  | 4     | 1 | j21 |
| .....cUggucgggaguuagcucaagcgg.....  | 2     | 1 | j21 |
| .....cgggucAgaguuagcucaagcgg.....   | 1     | 1 | j21 |
| .....cggAucgggaguuagcucaagcgg.....  | 13    | 1 | j21 |
| .....cgggucgggaguuagcuUaagcgg.....  | 64    | 1 | j21 |
| .....cgggucgggaguuCgcucaagcgg.....  | 42    | 1 | j21 |
| .....cCggucgggaguuagcucaagcgg.....  | 35    | 1 | j21 |
| .....cgggucgggaguuagcucaaAcgg.....  | 11    | 1 | j21 |
| .....cgggucgggaguuagcuCaaagcgg..... | 86    | 1 | j21 |
| .....cgggucgggaguuagcucaGgucgg..... | 13    | 1 | j21 |
| .....cgggucgggaguuagcucGagcgg.....  | 13    | 1 | j21 |
| .....Ugggucgggaguuagcucaagcgg.....  | 121   | 1 | j21 |
| .....cgggucgggaguuAaCcucaagcgg..... | 32    | 1 | j21 |
| .....cgggucgggagCuagcucaagcgg.....  | 63    | 1 | j21 |
| .....cgggucgggaguuagcucaagcgg.....  | 23052 | 0 | j21 |
| .....cgggucgggaguuagcucaagcUg.....  | 11    | 1 | j21 |
| .....cgAucgggaguuagcucaagcgg.....   | 10    | 1 | j21 |
| .....cgggucgggAuuagcucaagcgg.....   | 6     | 1 | j21 |
| .....cUggucgggaguuagcucaagcgg.....  | 13    | 1 | j21 |
| .....cgggucgggAuuagcucaagcgg.....   | 12    | 1 | j21 |
| .....cgggucgggAuaagcucaagcgg.....   | 20    | 1 | j21 |
| .....cgggucgggaguuagcucaaUcgg.....  | 63    | 1 | j21 |
| .....cgggucgggaguuagUuaagcgg.....   | 38    | 1 | j21 |
| .....cgggucgggaguuagcucCagcgg.....  | 77    | 1 | j21 |
| .....cggguGggaguuagcucaagcgg.....   | 29    | 1 | j21 |
| .....cgggucgggaguuAagcucaagcgg..... | 2     | 1 | j21 |
| .....cgggGcgggaguuagcucaagcgg.....  | 1022  | 1 | j21 |
| .....cggCucgggaguuagcucaagcgg.....  | 32    | 1 | j21 |
| .....Ggggucgggaguuagcucaagcgg.....  | 31    | 1 | j21 |
| .....cAggucgggaguuagcucaagcgg.....  | 21    | 1 | j21 |
| .....cgggucgggaguuagcucaCgucgg..... | 51    | 1 | j21 |
| .....cgggucggGuuagcucaagcgg.....    | 53    | 1 | j21 |
| .....cgggucgggaguuagcucaagcU.....   | 35    | 1 | j21 |
| .....cgggucggUguuagcucaagcgg.....   | 16    | 1 | j21 |
| .....cgggucgggaguuagcucaagGg.....   | 32    | 1 | j21 |
| .....cggguAaggaguuagcucaagcgg.....  | 37    | 1 | j21 |
| .....cgggucgggaguuagcucaagcggC..... | 390   | 1 | j21 |
| .....cgggucUgaguuagcucaagcgg.....   | 5     | 1 | j21 |
| .....cgggucgggaguuGagcucaagcgg..... | 46    | 1 | j21 |
| .....cgggucgggaguuagGuaagcgg.....   | 40    | 1 | j21 |
| .....cgggucgggaguuagcucaaCcg.....   | 49    | 1 | j21 |
| .....cgggucgggaguuagcucaagcA.....   | 10    | 1 | j21 |
| .....cgggucgggaguuagcucaagcC.....   | 34    | 1 | j21 |
| .....cgggucgAaguuagcucaagcgg.....   | 6     | 1 | j21 |
| .....cgggucgCaguuagcucaagcgg.....   | 29    | 1 | j21 |
| .....cgggucgggaguuagcucaagA.....    | 46    | 1 | j21 |
| .....cgggucgUaguuagcucaagcgg.....   | 22    | 1 | j21 |
| .....cgggucgggaguuagAuaagcgg.....   | 74    | 1 | j21 |
| .....cgggucgggaguuagcuGaaagcgg..... | 26    | 1 | j21 |
| .....cgggucgggaguuUcucaagcgg.....   | 35    | 1 | j21 |
| .....cgggucggGuuagcucaagcgg.....    | 36    | 1 | j21 |
| .....cgggAcggaguuagcucaagcgg.....   | 106   | 1 | j21 |
| .....cggUucgggaguuagcucaagcgg.....  | 15    | 1 | j21 |
| .....cgUgucgggaguuagcucaagcgg.....  | 4     | 1 | j21 |
| .....cgggucgggaguuCagcucaagcgg..... | 50    | 1 | j21 |
| .....cgggucgggaguuagcucaagcggG..... | 344   | 1 | j21 |
| .....cgggucgggaguuGgcucaagcgg.....  | 9     | 1 | j21 |
| .....cgggucgggaguuagcucaagcG.....   | 25    | 1 | j21 |
| .....cgggucCgaguuagcucaagcgg.....   | 15    | 1 | j21 |
| .....cgggucgggaguuagcuUaagcgg.....  | 76    | 1 | j21 |
| .....cgggCcgaguuagcucaagcgg.....    | 311   | 1 | j21 |
| .....cgggucgggaguuagcGcaagcgg.....  | 91    | 1 | j21 |
| .....cgggucgggaguuAaAaagcgg.....    | 10    | 1 | j21 |
| .....cgggucgggaguuagcucUagcgg.....  | 5     | 1 | j21 |
| .....cgggucgggaguuagcAaagcgg.....   | 31    | 1 | j21 |
| .....cgggucAaguuagcucaagcgg.....    | 8     | 1 | j21 |

cuaccgggucgggaguuagcucaagcgguuaccuccuacugcgggacuuucuaucuguccaucucugugcgggguuucgagaccgcgggugcuuacugaccuuuuuag

|                                       |      |   |     |
|---------------------------------------|------|---|-----|
| .....cgggucgggaguuagcucaagcggA.....   | 3    | 1 | j21 |
| .....Agggucgggaguuagcucaagcgggu.....  | 68   | 1 | j21 |
| .....cgggucgggaguuagcucaagcgggu.....  | 353  | 1 | j21 |
| .....cgggucgggaguuagcucaUgcgggu.....  | 2    | 1 | j21 |
| .....cgCgucgggaguuagcucaagcgggu.....  | 24   | 1 | j21 |
| .....cgggucgggAuuagcucaagcgggu.....   | 22   | 1 | j21 |
| .....cgggucgggaguuagcucaagUgggu.....  | 33   | 1 | j21 |
| .....cggguUgggaguuagcucaagcgggu.....  | 46   | 1 | j21 |
| .....cgggucgggaguuagcucaagcggA.....   | 553  | 1 | j21 |
| .....cgggucgggaguuUgcucaagcgggu.....  | 2    | 1 | j21 |
| .....cggAucgggaguuagcucaagcgggu.....  | 2    | 1 | j21 |
| .....cgggGcgggaguuagcucaagcgggu.....  | 186  | 1 | j21 |
| .....cgggucgggaguuagcucaagcggG.....   | 68   | 1 | j21 |
| .....cgggucgggaguuagcucaagcggA.....   | 29   | 1 | j21 |
| .....Agggucgggaguuagcucaagcgggu.....  | 14   | 1 | j21 |
| .....cgCgucgggaguuagcucaagcgggu.....  | 5    | 1 | j21 |
| .....cggguUgggaguuagcucaagcgggu.....  | 9    | 1 | j21 |
| .....cgggCcgggaguuagcucaagcgggu.....  | 72   | 1 | j21 |
| .....cgggucgggaguuagcucaacCgggu.....  | 6    | 1 | j21 |
| .....cgggucgggaguuagcucaagcAgu.....   | 1    | 1 | j21 |
| .....cgggucgggaguuagcucaagcggG.....   | 82   | 1 | j21 |
| .....cgAucgggaguuagcucaagcgggu.....   | 2    | 1 | j21 |
| .....cgggucgggaguuagcuUaagcgggu.....  | 12   | 1 | j21 |
| .....cggUucgggaguuagcucaagcgggu.....  | 4    | 1 | j21 |
| .....cgggucgggaguuagcucaGgcgggu.....  | 2    | 1 | j21 |
| .....cgggucgggaguuagcucaagcGU.....    | 7    | 1 | j21 |
| .....cgUucgggaguuagcucaagcgggu.....   | 2    | 1 | j21 |
| .....cgggucgggaguuagcAcaagcgggu.....  | 2    | 1 | j21 |
| .....cgggucgggaguuCgcucaagcgggu.....  | 10   | 1 | j21 |
| .....cgggucgggaguuagAucaagcgggu.....  | 14   | 1 | j21 |
| .....cgggucgggaguuagcucaagcGU.....    | 3    | 1 | j21 |
| .....cgggucgggaguuagcucaagcAgu.....   | 1    | 1 | j21 |
| .....cgggucgggaguuagcucaagcGU.....    | 4    | 1 | j21 |
| .....cgggucgggaguuGgcucaagcgggu.....  | 3    | 1 | j21 |
| .....cgggucgggaguuagcuUaagcgggu.....  | 7    | 1 | j21 |
| .....cUggucgggaguuagcucaagcgggu.....  | 3    | 1 | j21 |
| .....cgggucgggaguuacCucaagcgggu.....  | 9    | 1 | j21 |
| .....cgggucgggaguuagcucaagAgu.....    | 10   | 1 | j21 |
| .....Ugggucgggaguuagcucaagcgggu.....  | 18   | 1 | j21 |
| .....cgggucgggaguuagGucaagcgggu.....  | 6    | 1 | j21 |
| .....Ggggucgggaguuagcucaagcgggu.....  | 8    | 1 | j21 |
| .....cgggucgggaguuagcucCagcgggu.....  | 15   | 1 | j21 |
| .....cgggucgggaguuagcucaagcgggu.....  | 11   | 1 | j21 |
| .....cgggucgggaguuCagcucaagcgggu..... | 11   | 1 | j21 |
| .....cgggucgggaguuagcucaagcggA.....   | 1803 | 1 | j21 |
| .....cgggucgggaguuagcCcaagcgggu.....  | 15   | 1 | j21 |
| .....cggCucgggaguuagcucaagcgggu.....  | 5    | 1 | j21 |
| .....cgggucgggaguuagcucaagcgggu.....  | 4661 | 0 | j21 |
| .....cgggucgggaguuagcucaagUgggu.....  | 4    | 1 | j21 |
| .....cgggucgggAuuagcucaagcgggu.....   | 2    | 1 | j21 |
| .....cgggucgggaguuAucucaagcgggu.....  | 3    | 1 | j21 |
| .....cgggucgggAuuagcucaagcgggu.....   | 3    | 1 | j21 |
| .....cgggucgggUuuagcucaagcgggu.....   | 3    | 1 | j21 |
| .....cgggucgggaguuagUucaagcgggu.....  | 8    | 1 | j21 |
| .....cgggucUgaguuagcucaagcgggu.....   | 1    | 1 | j21 |
| .....cgggucAgaguuagcucaagcgggu.....   | 3    | 1 | j21 |
| .....cgggucgggaguuagcucaagcgggu.....  | 15   | 1 | j21 |
| .....cgggucgggaguuUcucaagcgggu.....   | 3    | 1 | j21 |
| .....cgggucgggaguuUgcucaagcgggu.....  | 3    | 1 | j21 |
| .....cgggucCgaguuagcucaagcgggu.....   | 1    | 1 | j21 |
| .....cgggucgggaguuagcucaagGgggu.....  | 13   | 1 | j21 |
| .....cgggAucgggaguuagcucaagcgggu..... | 25   | 1 | j21 |
| .....cgggucgggaguuagcucaagcgggu.....  | 10   | 1 | j21 |
| .....cgggucgggAuuagcucaagcgggu.....   | 4    | 1 | j21 |
| .....cggguGgggaguuagcucaagcgggu.....  | 4    | 1 | j21 |
| .....cgggucgggaguuagcucaagcggCu.....  | 81   | 1 | j21 |
| .....cgggucgggaguuagcucGagcgggu.....  | 5    | 1 | j21 |
| .....cgggucgggaguuagcucaagcggguC..... | 28   | 1 | j21 |
| .....cgggucgggaguuagcucaUgcgggu.....  | 2    | 1 | j21 |

cuaccgggucggaguuagcucaagcgguuuaccuccuacugcgggacuuucuaucuguccaucucugugcgggguuucgagaccgcgggugcuuacugaccuuuuuag

|                                       |      |   |     |
|---------------------------------------|------|---|-----|
| .....cAggucggaguuagcucaagcgguu.....   | 3    | 1 | j21 |
| .....cgggucggaguuagcuGaaagcgguu.....  | 6    | 1 | j21 |
| .....cgggucggaguuagcucaaUcgguu.....   | 17   | 1 | j21 |
| .....cgggucGlaguuagcucaagcgguu.....   | 1    | 1 | j21 |
| .....cgggucgUaguuagcucaagcgguu.....   | 4    | 1 | j21 |
| .....cCggucggaguuagcucaagcgguu.....   | 10   | 1 | j21 |
| .....cgggucggagGuaagcucaagcgguu.....  | 55   | 1 | j21 |
| .....cgggucggaguuagcucaagcgguu.....   | 1    | 1 | j21 |
| .....cgggucggaguuagcucaCgcgguu.....   | 8    | 1 | j21 |
| .....cgggucggcGuuagcucaagcgguu.....   | 7    | 1 | j21 |
| .....cgggucggaguuagcGcaagcgguu.....   | 14   | 1 | j21 |
| .....cgggucgCaguuagcucaagcgguu.....   | 4    | 1 | j21 |
| .....cgggucggGuuagcucaagcgguu.....    | 2    | 1 | j21 |
| .....cgggucggagluagcucaagcgguu.....   | 3    | 1 | j21 |
| .....cgggucggaguuagcucaagcggGua.....  | 2    | 1 | j21 |
| .....cgggucggaguuagcucCagcgguu.....   | 1    | 1 | j21 |
| .....cgggGcggaguuagcucaagcgguu.....   | 10   | 1 | j21 |
| .....cgggucggaguuagcucaagcgguuU.....  | 1341 | 1 | j21 |
| .....cgggucggaguuagcucaagcgguuG.....  | 16   | 1 | j21 |
| .....cgggucggaguuagcucaagcgguuC.....  | 7    | 1 | j21 |
| .....cggguUaggaguuagcucaagcgguu.....  | 1    | 1 | j21 |
| .....cgggucggaguuagcucaagcggCa.....   | 3    | 1 | j21 |
| .....cgggucggcGuuagcucaagcgguu.....   | 1    | 1 | j21 |
| .....Ugggucggaguuagcucaagcgguu.....   | 1    | 1 | j21 |
| .....cgggucggaguuagcucaaUcgguu.....   | 1    | 1 | j21 |
| .....cgggucggaguuagcucaagcgguGa.....  | 9    | 1 | j21 |
| .....cgggAcggaguuagcucaagcgguu.....   | 1    | 1 | j21 |
| .....cgggucggaguuaglucaagcgguu.....   | 1    | 1 | j21 |
| .....cgggucggaguuagcuGaaagcgguu.....  | 1    | 1 | j21 |
| .....cgggCcggaguuagcucaagcgguu.....   | 3    | 1 | j21 |
| .....cgggucggaguuagcucaagcgguaA.....  | 1350 | 1 | j21 |
| .....cgggucggaguuagcucaagGgguu.....   | 2    | 1 | j21 |
| .....cgggucggaguuagcucaagcgguu.....   | 143  | 0 | j21 |
| .....cgggucggaguuagcucaCgcgguu.....   | 1    | 1 | j21 |
| .....cgggucggaguuagcucaagcgguuac..... | 3    | 0 | j21 |
| .....cgggucggaguuagcucaagcgguuA.....  | 69   | 1 | j21 |
| .....cgggGcggaguuagcucaagcgguuac..... | 1    | 1 | j21 |
| .....cgggucggaguuagcucaagcgguuU.....  | 6    | 1 | j21 |
| .....gggucggaguuagcucaag.....         | 2    | 0 | j21 |
| .....gggucggaguuagcucaagc.....        | 3    | 0 | j21 |
| .....gggucggaguuagcucaagUg.....       | 1    | 1 | j21 |
| .....gggucggaguuagcucaagcgg.....      | 3    | 0 | j21 |
| .....gggucggaguuagcuUaaagcgg.....     | 1    | 1 | j21 |
| .....gggGcggaguuagcucaagcgg.....      | 15   | 1 | j21 |
| .....gggucggaguuagcGcaagcgg.....      | 2    | 1 | j21 |
| .....gggucggaguuagcucaagcgcC.....     | 1    | 1 | j21 |
| .....gggucggaguuagUuaagcgg.....       | 2    | 1 | j21 |
| .....gggucggaguuagcucCagcgg.....      | 3    | 1 | j21 |
| .....gggucCgaguuagcucaagcgg.....      | 1    | 1 | j21 |
| .....gggucggaguuagcucaagcggU.....     | 1    | 1 | j21 |
| .....gggucggaguuagcCcaagcgg.....      | 1    | 1 | j21 |
| .....gggucggaguuagcAcaagcgg.....      | 1    | 1 | j21 |
| .....gggucggaguuagcucaagcgg.....      | 163  | 0 | j21 |
| .....gggucggaguuagcucaCgcgg.....      | 1    | 1 | j21 |
| .....gggucggagGuaagcucaagcgg.....     | 4    | 1 | j21 |
| .....gggCcgaguuagcucaagcgg.....       | 2    | 1 | j21 |
| .....Cggucggaguuagcucaagcgg.....      | 6    | 1 | j21 |
| .....ggUucggaguuagcucaagcgg.....      | 1    | 1 | j21 |
| .....gggucggaguuagcucaagcgg.....      | 821  | 0 | j21 |
| .....gggucggagCuagcucaagcgg.....      | 3    | 1 | j21 |
| .....gggucggaguuagcuGaaagcgg.....     | 2    | 1 | j21 |
| .....gggucCgaguuagcucaagcgg.....      | 1    | 1 | j21 |
| .....gggucAgaguuagcucaagcgg.....      | 3    | 1 | j21 |
| .....gggucggaguuagcucaagUgg.....      | 5    | 1 | j21 |
| .....gggucggaguuagcuUaagcgg.....      | 6    | 1 | j21 |
| .....gggucggaguuCagcucaagcgg.....     | 1    | 1 | j21 |
| .....gggucggagGuaagcucaagcgg.....     | 16   | 1 | j21 |
| .....gggucggaguuUcucaagcgg.....       | 1    | 1 | j21 |
| .....ggguUggaguuagcucaagcgg.....      | 1    | 1 | j21 |

cuaccgggucggaguuagcucaagcgguuaccuccuacugcggacuuucuaucuguccaucucugucgggguuucgagaccgcgggugcuuacugaccuuuuuag

|                                     |    |   |     |
|-------------------------------------|----|---|-----|
| .....Cggucggaguuagcucaagcgggu.....  | 12 | 1 | j21 |
| .....ggCucggaguuagcucaagcgggu.....  | 2  | 1 | j21 |
| .....gggucggaguuagcuAaagcgggu.....  | 4  | 1 | j21 |
| .....gggucggaguuagcucaaCcggu.....   | 6  | 1 | j21 |
| .....gggucgCaguuagcucaagcgggu.....  | 2  | 1 | j21 |
| .....gCgucggaguuagcucaagcgggu.....  | 3  | 1 | j21 |
| .....Aggucggaguuagcucaagcgggu.....  | 2  | 1 | j21 |
| .....gggucggaguuagcucaagcggCu.....  | 2  | 1 | j21 |
| .....gggGcggaguuagcucaagcgggu.....  | 49 | 1 | j21 |
| .....gggucggaguuGagcucaagcgggu..... | 2  | 1 | j21 |
| .....gggucggGguuagcucaagcgggu.....  | 1  | 1 | j21 |
| .....ggguGggaguuagcucaagcgggu.....  | 4  | 1 | j21 |
| .....gggucggaguuagUucaagcgggu.....  | 2  | 1 | j21 |
| .....gggucggaguuagcGcaagcgggu.....  | 8  | 1 | j21 |
| .....gggucggaguuagcucaagcCgu.....   | 3  | 1 | j21 |
| .....ggUucggaguuagcucaagcgggu.....  | 2  | 1 | j21 |
| .....gggucggaguuagcucaaAcgggu.....  | 1  | 1 | j21 |
| .....gggucggaguuagcucaagcggG.....   | 18 | 1 | j21 |
| .....gggucggaguuuAuccaagcgggu.....  | 1  | 1 | j21 |
| .....gggucggaguuagcucaCgcgggu.....  | 1  | 1 | j21 |
| .....gggucggaguuagcucaagcclgu.....  | 1  | 1 | j21 |
| .....gggucggaguuCgcucaagcgggu.....  | 1  | 1 | j21 |
| .....gggucggaguuagcucaagcggcC.....  | 22 | 1 | j21 |
| .....gggucggaguuagcCcaagcgggu.....  | 1  | 1 | j21 |
| .....gggucggaguuagcucaagcggA.....   | 15 | 1 | j21 |
| .....gggucggaguuagcucaaUcgggu.....  | 2  | 1 | j21 |
| .....gggucggaguuagAucaagcgggu.....  | 2  | 1 | j21 |
| .....gggucggaguuagcucaagGgggu.....  | 1  | 1 | j21 |
| .....gggucggUguuagcucaagcgggu.....  | 1  | 1 | j21 |
| .....gggCcggaguuagcucaagcgggu.....  | 13 | 1 | j21 |
| .....Uggucggaguuagcucaagcgggu.....  | 1  | 1 | j21 |
| .....gggucggaguuagcucGagcgggu.....  | 2  | 1 | j21 |
| .....gggucggaguuagcucCagcgggu.....  | 7  | 1 | j21 |
| .....gggucggaCuuaagcucaagcgggu..... | 2  | 1 | j21 |
| .....gggucggaguuagcucaGgcgggu.....  | 1  | 1 | j21 |
| .....gggucggaguuuAuccaagcgggu.....  | 1  | 1 | j21 |
| .....gggucggaguuagcucaagcggUu.....  | 1  | 1 | j21 |
| .....gggucgAaguuagcucaagcgggu.....  | 2  | 1 | j21 |
| .....ggguAaggaguuagcucaagcgggu..... | 2  | 1 | j21 |
| .....gggucggaguuagcucaagcUgu.....   | 2  | 1 | j21 |
| .....gggucggCguuagcucaagcgggu.....  | 3  | 1 | j21 |
| .....gggAcggaguuagcucaagcgggu.....  | 7  | 1 | j21 |
| .....gggucggaguuagAucaagcgggu.....  | 3  | 1 | j21 |
| .....gggucggaguuuAuccaagcgggu.....  | 1  | 1 | j21 |
| .....gggucggaguuagcucaagcggguA..... | 80 | 1 | j21 |
| .....gggucggaguuagcucaagAgggu.....  | 1  | 1 | j21 |
| .....gggAcggaguuagcucaagcgggu.....  | 6  | 1 | j21 |
| .....gggucggaguuagcucaagcggCu.....  | 9  | 1 | j21 |
| .....ggguAggaguuagcucaagcgggu.....  | 1  | 1 | j21 |
| .....ggguGggaguuagcucaagcgggu.....  | 1  | 1 | j21 |
| .....gggucggaguuagcucaCgcgggu.....  | 1  | 1 | j21 |
| .....gggCcggaguuagcucaagcgggu.....  | 5  | 1 | j21 |
| .....gggucggaguuCgcucaagcgggu.....  | 1  | 1 | j21 |
| .....gggucggCguuagcucaagcgggu.....  | 1  | 1 | j21 |
| .....gggucgCaguuagcucaagcgggu.....  | 1  | 1 | j21 |
| .....gggucggaguuGagcucaagcgggu..... | 2  | 1 | j21 |
| .....gUgucggaguuagcucaagcgggu.....  | 1  | 1 | j21 |
| .....gggucggaguuagUucaagcgggu.....  | 2  | 1 | j21 |
| .....gggucggaCuuaagcucaagcgggu..... | 1  | 1 | j21 |
| .....gggucggaguuagcucaaAcgggu.....  | 1  | 1 | j21 |
| .....ggCucggaguuagcucaagcgggu.....  | 1  | 1 | j21 |
| .....gggucggagAuaagcucaagcgggu..... | 2  | 1 | j21 |
| .....gggucggaguuagcucaagcggUu.....  | 2  | 1 | j21 |
| .....gggucggaguuagcucaagcggG.....   | 9  | 1 | j21 |
| .....gCgucggaguuagcucaagcgggu.....  | 3  | 1 | j21 |
| .....gggucAaguuagcucaagcgggu.....   | 1  | 1 | j21 |
| .....gggucggaguuagcucaaCcggu.....   | 1  | 1 | j21 |
| .....gggGcggaguuagcucaagcgggu.....  | 20 | 1 | j21 |
| .....Cggucggaguuagcucaagcgggu.....  | 2  | 1 | j21 |

cuaccgggucgggaguuagcucaagcgguuuaccuccuacugccggacuucuaucuguccaucucugucgggguuucgagaccgcgggugcuuacugaccuuuuuag

|                                         |     |   |     |
|-----------------------------------------|-----|---|-----|
| .....gggucgggaguuagcucaagcggAu.....     | 1   | 1 | j21 |
| .....gggucgggagCuagcucaagcgguu.....     | 2   | 1 | j21 |
| .....gggucgggaguuGdcucaagcgguu.....     | 1   | 1 | j21 |
| .....gggucgggaguuagcucaagcgguC.....     | 1   | 1 | j21 |
| .....gggucgggaguuagcucaagcgguu.....     | 385 | 0 | j21 |
| .....gggucgggagGuagcucaagcgguu.....     | 6   | 1 | j21 |
| .....gggucgggaguuagcucaUcgguu.....      | 1   | 1 | j21 |
| .....gggucgggaguuagcuCagcgguu.....      | 4   | 1 | j21 |
| .....gggucgggaguuagcucaagcgguG.....     | 5   | 1 | j21 |
| .....gggucgggaguuagcGcaagcgguu.....     | 5   | 1 | j21 |
| .....gggucgggaguuagcCcaagcgguu.....     | 1   | 1 | j21 |
| .....gggucgggaguuagcucaagcggGuA.....    | 1   | 1 | j21 |
| .....gggucgggaguuagcucaagcggCuA.....    | 2   | 1 | j21 |
| .....gggucgggaguuagcucaagcgguuG.....    | 3   | 1 | j21 |
| .....gggucgggaguuGagcucaagcgguuA.....   | 1   | 1 | j21 |
| .....gggucgggaguuagcucaagcggAuA.....    | 1   | 1 | j21 |
| .....gggGcggaguuagcucaagcgguuA.....     | 2   | 1 | j21 |
| .....gggucgggaguuagcucaagcgguuU.....    | 398 | 1 | j21 |
| .....gggucgggaguuagcucaagcgguuAa.....   | 51  | 1 | j21 |
| .....gggucgggaguuagcucaagcgguuC.....    | 5   | 1 | j21 |
| .....gggucgggaguuagcGcaagcgguuA.....    | 1   | 1 | j21 |
| .....gggucgggaguuagcucaagcgguuA.....    | 28  | 0 | j21 |
| .....gggucgggaguuagcucaagcgguuac.....   | 10  | 0 | j21 |
| .....gggucgggaguuagcucaagcggCuac.....   | 1   | 1 | j21 |
| .....gggucgggAuuagcucaagcgguuac.....    | 1   | 1 | j21 |
| .....gggucgggaguuagcucaagcgguuA.....    | 8   | 1 | j21 |
| .....gggucgggaguuagcGcaagcgguuac.....   | 1   | 1 | j21 |
| .....gggucgggaguuagcucaagcgguuAU.....   | 1   | 1 | j21 |
| .....gggucgggaguuagcucaagAgguuac.....   | 1   | 1 | j21 |
| .....gggucgggaguuagGucaagcgguuac.....   | 1   | 1 | j21 |
| .....gggucgggaguuagcucaagcgguuacA.....  | 2   | 1 | j21 |
| .....gggucgggaguuagcucaaaCgguuacc.....  | 1   | 1 | j21 |
| .....gggucgggaguuagcucaagcgguuacc.....  | 2   | 0 | j21 |
| .....Cgucgggaguuagcucaagcgg.....        | 1   | 1 | j21 |
| .....ggGcgggaguuagcucaagcgguu.....      | 1   | 1 | j21 |
| .....ggucgggaguuagcucaagcgguu.....      | 1   | 0 | j21 |
| .....ggucgggaguuagcucaagcgguuU.....     | 1   | 1 | j21 |
| .....ggucgggaguuagcucaagcgguuA.....     | 1   | 0 | j21 |
| .....ucgggaguuagcucaagcgguu.....        | 1   | 0 | j21 |
| .....ucgggaguuagcucaagcgguu.....        | 2   | 0 | j21 |
| .....ucgggaguuagcucaagcgguuA.....       | 1   | 0 | j21 |
| .....cgggaguuagcucaagcgguu.....         | 1   | 0 | j21 |
| .....ggaguuagcucaagUggu.....            | 1   | 1 | j21 |
| .....ggaguuagcucaagcggA.....            | 2   | 1 | j21 |
| .....ggaguuagcucaagcggG.....            | 1   | 1 | j21 |
| .....ggaguuagcucaagcgguu.....           | 32  | 0 | j21 |
| .....ggaguuagcucaagcggC.....            | 2   | 1 | j21 |
| .....ggaguuagcucaagcAgu.....            | 1   | 1 | j21 |
| .....ggaCuagcucaagcgguu.....            | 1   | 1 | j21 |
| .....ggaguuagcucaagcgguu.....           | 4   | 0 | j21 |
| .....ggaguuagcucaagcggua.....           | 1   | 1 | j21 |
| .....ggaguuagcucaagcgguaA.....          | 1   | 1 | j21 |
| .....agAgguuaccuccuacugccggacuucuu..... | 1   | 1 | j21 |
| .....gguuaccuccuacugccggacuA.....       | 1   | 1 | j21 |
| .....gguuaccuccuacugccggauuu.....       | 1   | 1 | j21 |
| .....uaGcuccuacugccggacu.....           | 1   | 1 | j21 |
| .....uaccuccuacugccggacu.....           | 2   | 0 | j21 |
| .....uaccuccuacugUcggacu.....           | 1   | 1 | j21 |
| .....uaccuccuacugccggCuu.....           | 1   | 1 | j21 |
| .....uaccuccuacugccggacuu.....          | 5   | 0 | j21 |
| .....uaccuccuacugcUgacuuu.....          | 1   | 1 | j21 |
| .....uaccuccuacugccggacuuu.....         | 7   | 0 | j21 |
| .....uaccuccuacugccggaAuuu.....         | 1   | 1 | j21 |
| .....uaccuccuacugccggacuuc.....         | 6   | 0 | j21 |
| .....uaccuccuacugccggacuucuu.....       | 32  | 0 | j21 |
| .....uaccuUcucugccggacuucuu.....        | 3   | 1 | j21 |
| .....uaccuccuacuUccggacuucuu.....       | 1   | 1 | j21 |
| .....uaccuccuacugccggacuucC.....        | 1   | 1 | j21 |
| .....uacUuccuacugccggacuucuu.....       | 1   | 1 | j21 |

cuaccgggucggaguagcucaagcgguuaccuccucaugccggacuucuaucuguccaucugugcggggucgagaccgcgggugcuuacugaccuuuaug

|                                     |     |   |     |
|-------------------------------------|-----|---|-----|
| .....uaccuccucaugccggacuucua.....   | 1   | 0 | j21 |
| .....uaccuccucaugccggacuuuGua.....  | 1   | 1 | j21 |
| .....uaccuccucaugccggacuucua.....   | 2   | 0 | j21 |
| .....uaccuccucaugccggacuucuaA.....  | 1   | 1 | j21 |
| .....uaccuccucaugccggacuucuauc..... | 1   | 0 | j21 |
| .....uaccuccucaugccggacuucuauc..... | 2   | 0 | j21 |
| .....ccucaugccggacuucua.....        | 1   | 0 | j21 |
| .....Uucaugccggacuucua.....         | 1   | 1 | j21 |
| .....ucaugccggacuucuauc.....        | 1   | 0 | j21 |
| .....ucaugccggacuucuauc.....        | 1   | 0 | j21 |
| .....uucuaucuguccaucu.....          | 1   | 0 | j21 |
| .....uucuaCcguccaucu.....           | 1   | 1 | j21 |
| .....cucugugcggggucgagacc.....      | 1   | 0 | j21 |
| .....ucugugcggggucgagacU.....       | 1   | 1 | j21 |
| .....cugugcgggUucgaga.....          | 1   | 1 | j21 |
| .....cugugcggggucgagac.....         | 5   | 0 | j21 |
| .....cugugcggggucgagacc.....        | 1   | 0 | j21 |
| .....cugugcggggucgagaccU.....       | 1   | 1 | j21 |
| .....guucgagaccgcggcGcu.....        | 2   | 1 | j21 |
| .....acUcggggugcuuacugaccuu.....    | 1   | 1 | j21 |
| .....accgcgggugcuuacugaccuu.....    | 3   | 0 | j21 |
| .....Acggggugcuuacugaccuu.....      | 4   | 1 | j21 |
| .....cgcgggGcuuacugacc.....         | 1   | 1 | j21 |
| .....cgcgggugcuuacugaGc.....        | 1   | 1 | j21 |
| .....cgcgggGcuuacugacc.....         | 2   | 1 | j21 |
| .....cgcgggugcuuacugacc.....        | 17  | 0 | j21 |
| .....cgcgggugcuuacugaccA.....       | 1   | 1 | j21 |
| .....cgcgggAgcuuacugacc.....        | 1   | 1 | j21 |
| .....cgcgggugcuuacGgacc.....        | 1   | 1 | j21 |
| .....cgcgggugcuuacugacc.....        | 18  | 0 | j21 |
| .....cgcgggGcuuacugacc.....         | 3   | 1 | j21 |
| .....cgcgggugcuuacugacc.....        | 2   | 1 | j21 |
| .....cgcgggugcuuacugGccu.....       | 1   | 1 | j21 |
| .....cgcgggugGcuuacugaccu.....      | 1   | 1 | j21 |
| .....cgcgggugcuuacugaccAu.....      | 1   | 1 | j21 |
| .....cgcgggAgcuuacugaccu.....       | 2   | 1 | j21 |
| .....cgcgggugcuuacugaccG.....       | 2   | 1 | j21 |
| .....cgcGugcuuacugaccu.....         | 1   | 1 | j21 |
| .....cgcgggugcuuacugaccu.....       | 134 | 0 | j21 |
| .....cgcgggugcuuacugaccC.....       | 4   | 1 | j21 |
| .....cgcgggugcuuacugaccu.....       | 1   | 1 | j21 |
| .....cgcgggugcCuacugaccu.....       | 1   | 1 | j21 |
| .....cgcgggugcuuacugaccGu.....      | 1   | 1 | j21 |
| .....cgcgggGcuuacugaccu.....        | 5   | 1 | j21 |
| .....cgcgggGcuuacugaccu.....        | 5   | 1 | j21 |
| .....cgcgggugGcuuacugaccu.....      | 1   | 1 | j21 |
| .....cgcgggugcuuacugaccU.....       | 2   | 1 | j21 |
| .....cgcgggugcAuuacugaccu.....      | 1   | 1 | j21 |
| .....cgcgggugcuuacuUaccuu.....      | 10  | 1 | j21 |
| .....cgcgggugcuuauUgaccuu.....      | 8   | 1 | j21 |
| .....cCgggugcuuacugaccu.....        | 6   | 1 | j21 |
| .....cgcgggugcuuacugaUccuu.....     | 20  | 1 | j21 |
| .....cgcgggugcuuacGgaccuu.....      | 8   | 1 | j21 |
| .....Agcgggugcuuacugaccu.....       | 14  | 1 | j21 |
| .....cgcgggugcuuacGgaccuu.....      | 13  | 1 | j21 |
| .....Ggcgggugcuuacugaccu.....       | 2   | 1 | j21 |
| .....cgcgggugcuuacuCaaccuu.....     | 11  | 1 | j21 |
| .....cgcgggGcuuacugaccu.....        | 166 | 1 | j21 |
| .....cgcgggugcuuacugacUccu.....     | 13  | 1 | j21 |
| .....cgcgggugcuuacugaccCu.....      | 14  | 1 | j21 |
| .....cgcgggugcuuacugaccuA.....      | 53  | 1 | j21 |
| .....cgcgggugcuuacugacAcuu.....     | 11  | 1 | j21 |
| .....cgcggguCcuuacugaccu.....       | 6   | 1 | j21 |
| .....cgcggGcguuacugaccu.....        | 7   | 1 | j21 |
| .....cgcggguAcuuacugaccu.....       | 3   | 1 | j21 |
| .....cgcAggugcuuacugaccu.....       | 6   | 1 | j21 |
| .....cgcgggugcuuacugaccAu.....      | 3   | 1 | j21 |
| .....cgcgggugcuuacugCccuu.....      | 10  | 1 | j21 |
| .....cgcgggAgcuuacugaccu.....       | 38  | 1 | j21 |

cuaccgggucggaguuagcucaagcgguuaccuccuacugcgggacuuuauucuguccaucucugucgggguuucgagaccgcggggugcuuacugacccuuuauug

|                                  |      |   |     |
|----------------------------------|------|---|-----|
| .....cgcgggugcuGacugacccuu.....  | 16   | 1 | j21 |
| .....cgcgggugcuuacugaccGuu.....  | 6    | 1 | j21 |
| .....cgcgggugcuuacugaccuC.....   | 5    | 1 | j21 |
| .....cgcgggugcuuacugaAccuu.....  | 21   | 1 | j21 |
| .....cgcgggCgcuuacugacccuu.....  | 145  | 1 | j21 |
| .....cgcgggUgcuuacugacccuu.....  | 6    | 1 | j21 |
| .....cgGgggugcuuacugacccuu.....  | 1    | 1 | j21 |
| .....cgcgggugcuuGcugacccuu.....  | 2    | 1 | j21 |
| .....cgcgggugcuuacugacGcuu.....  | 3    | 1 | j21 |
| .....cAcgggugcuuacugacccuu.....  | 4    | 1 | j21 |
| .....cgcgggugcuuGugacccuu.....   | 5    | 1 | j21 |
| .....cUcgggugcuuacugacccuu.....  | 1    | 1 | j21 |
| .....cgcgggugAuuacugacccuu.....  | 6    | 1 | j21 |
| .....cgcgggugcCuacugacccuu.....  | 6    | 1 | j21 |
| .....cgcgggugcuuacugaccGu.....   | 18   | 1 | j21 |
| .....cgCgggugcuuacugacccuu.....  | 7    | 1 | j21 |
| .....cGgggugcuuacugacccuu.....   | 2    | 1 | j21 |
| .....cgAgggugcuuacugacccuu.....  | 7    | 1 | j21 |
| .....cgcgggugcuuCcugacccuu.....  | 10   | 1 | j21 |
| .....cgcgggugcuuacugUccuu.....   | 3    | 1 | j21 |
| .....cgcgggugcuuacugaGccuu.....  | 8    | 1 | j21 |
| .....cgcgggUcuuacugacccuu.....   | 6    | 1 | j21 |
| .....cgCgggugcuuacugacccuu.....  | 6    | 1 | j21 |
| .....cgcgggugcuAacugacccuu.....  | 1    | 1 | j21 |
| .....cgcgUgugcuuacugacccuu.....  | 5    | 1 | j21 |
| .....cgcgggugcuuacugaccAu.....   | 15   | 1 | j21 |
| .....cgcgggugGuuacugacccuu.....  | 7    | 1 | j21 |
| .....cgcgggugcGuacugacccuu.....  | 12   | 1 | j21 |
| .....cgcgggugcuuacugacccuu.....  | 4262 | 0 | j21 |
| .....cgcgCgugcuuacugacccuu.....  | 7    | 1 | j21 |
| .....cgcgggugcuuacuAaccuu.....   | 3    | 1 | j21 |
| .....Ugcgggugcuuacugacccuu.....  | 23   | 1 | j21 |
| .....cgcgggugcuuacugaccuG.....   | 16   | 1 | j21 |
| .....cgcgggugcuuAaugacccuu.....  | 11   | 1 | j21 |
| .....cgcgggugUuuacugacccuu.....  | 24   | 1 | j21 |
| .....cgcgggugcuCacugacccuu.....  | 4    | 1 | j21 |
| .....cgcggAugcuuacugacccuu.....  | 6    | 1 | j21 |
| .....cgcgAgugcuuacugacccuu.....  | 5    | 1 | j21 |
| .....cgcgggugcuuacugaccUuu.....  | 16   | 1 | j21 |
| .....cgcgggugcuuacugaccuGu.....  | 15   | 1 | j21 |
| .....cCcgggugcuuacugacccuuu..... | 13   | 1 | j21 |
| .....cgUgggugcuuacugacccuuu..... | 2    | 1 | j21 |
| .....cgcgggugcGuacugacccuuu..... | 11   | 1 | j21 |
| .....cgcgggugcuuacugaGccuuu..... | 9    | 1 | j21 |
| .....cgcgggugcuuacugacccuuu..... | 8    | 1 | j21 |
| .....cgcgCugcuuacugacccuuu.....  | 10   | 1 | j21 |
| .....cgcgggugcuuacAgacccuuu..... | 2    | 1 | j21 |
| .....cgcgggugcuuacugaccuCu.....  | 11   | 1 | j21 |
| .....cgcgUgugcuuacugacccuuu..... | 5    | 1 | j21 |
| .....cgcgggugcuuacuCaaccuuu..... | 9    | 1 | j21 |
| .....cgcgggugcuuacugacGcuu.....  | 8    | 1 | j21 |
| .....cgcggAugcuuacugacccuuu..... | 2    | 1 | j21 |
| .....cgcgggugcuuacCgacccuuu..... | 5    | 1 | j21 |
| .....cgcgCgugcuuacugacccuuu..... | 9    | 1 | j21 |
| .....cgcgggugcuuacugacAcuuu..... | 8    | 1 | j21 |
| .....cgcgggugcuuacugaccAu.....   | 2    | 1 | j21 |
| .....cgcgggugcCuacugacccuuu..... | 6    | 1 | j21 |
| .....cgcgggugcuuacuUaccuuu.....  | 7    | 1 | j21 |
| .....Ugcgggugcuuacugacccuuu..... | 12   | 1 | j21 |
| .....cgcgggugcAuacugacccuuu..... | 2    | 1 | j21 |
| .....cgcgggugcuuacugaccGu.....   | 17   | 1 | j21 |
| .....cgcgggugcuCacugacccuuu..... | 1    | 1 | j21 |
| .....cgcgggugcuuacugacccuG.....  | 9    | 1 | j21 |
| .....Agcgggugcuuacugacccuuu..... | 12   | 1 | j21 |
| .....cgcgggugGuuacugacccuuu..... | 4    | 1 | j21 |
| .....cgcggguAcuuacugacccuuu..... | 2    | 1 | j21 |
| .....cgGgggugcuuacugacccuuu..... | 3    | 1 | j21 |
| .....cgCgggugcuuacugacccuuu..... | 9    | 1 | j21 |
| .....cgCgggugcuuacugacccuuu..... | 5    | 1 | j21 |



cuaccgggucggaguuagcucaagcgguuaccuccuacugcggacuucuaucuguccaucucugcggguucgagaccgcgggugcuuacugaccuuuuug

|                                     |      |   |     |
|-------------------------------------|------|---|-----|
| .....cgcgggugcuuacGgaccuuu... ..    | 9    | 1 | j21 |
| .....cgcgggugcuuaUgaccuuu... ..     | 9    | 1 | j21 |
| .....cAcgggugcuuacugaccuuu... ..    | 2    | 1 | j21 |
| .....cgcgggugcuuGcugaccuuu... ..    | 2    | 1 | j21 |
| .....cgcgggugcuuacugaccAuuu... ..   | 13   | 1 | j21 |
| .....cgCAgggugcuuacugaccuuu... ..   | 3    | 1 | j21 |
| .....cgcgggugcuuacuAaccuuu... ..    | 4    | 1 | j21 |
| .....cUcgggugcuuacugaccuuu... ..    | 1    | 1 | j21 |
| .....cgcgggAgcuuacugaccuuu... ..    | 49   | 1 | j21 |
| .....cgcgggugcuuacugaccGuu... ..    | 6    | 1 | j21 |
| .....cgAgggugcuuacugaccuuu... ..    | 11   | 1 | j21 |
| .....cgcgggGcguuacugaccuuu... ..    | 158  | 1 | j21 |
| .....cgcgggugcuuacugaccCuu... ..    | 6    | 1 | j21 |
| .....cgcgggUugcuuacugaccuuu... ..   | 4    | 1 | j21 |
| .....cgcgggUcguuacugaccuuu... ..    | 6    | 1 | j21 |
| .....cgcgggugcuuUcugaccuuu... ..    | 2    | 1 | j21 |
| .....cgcgggugcuuacugaccuuC... ..    | 12   | 1 | j21 |
| .....cgcgggugcuuacugaccuuu... ..    | 4010 | 0 | j21 |
| .....cgcgggugcuuacugCccuuu... ..    | 7    | 1 | j21 |
| .....cgcgggugAuuacugaccuuu... ..    | 8    | 1 | j21 |
| .....cgcgggugUuuacugaccuuu... ..    | 22   | 1 | j21 |
| .....cgcgggugcuuAugaccuuu... ..     | 13   | 1 | j21 |
| .....cgcgggugcuGacugaccuuu... ..    | 31   | 1 | j21 |
| .....cgcgggugcuuacugacUcuuu... ..   | 10   | 1 | j21 |
| .....cgcgggUcguuacugaccuuu... ..    | 6    | 1 | j21 |
| .....cgcgggugcuuGugaccuuu... ..     | 5    | 1 | j21 |
| .....cgcgggugcuuacugaAaccuu... ..   | 13   | 1 | j21 |
| .....cgcgggGcguuacugaccuuu... ..    | 151  | 1 | j21 |
| .....cgcgggugcuAacugaccuuu... ..    | 1    | 1 | j21 |
| .....cgcgggugcuuacugaUccuuu... ..   | 15   | 1 | j21 |
| .....cgcgggugcuuacugaccuuA... ..    | 16   | 1 | j21 |
| .....Gcgggugcuuacugaccuuu... ..     | 2    | 1 | j21 |
| .....cgcgggugcuuacugaccUuuu... ..   | 17   | 1 | j21 |
| .....cgcgggugcuuacugaccuuA... ..    | 42   | 1 | j21 |
| .....cgcgggugcuuAaugaccuuu... ..    | 1    | 1 | j21 |
| .....cgcgggugcGuaugaccuuuu... ..    | 1    | 1 | j21 |
| .....cgcgggugcuuacugaccuuuG... ..   | 1    | 1 | j21 |
| .....cgcgggugcuuacugCccuuu... ..    | 1    | 1 | j21 |
| .....Agcgggugcuuacugaccuuu... ..    | 2    | 1 | j21 |
| .....cgcgggugAuuacugaccuuu... ..    | 1    | 1 | j21 |
| .....cgcgggugcuuacugaccuuGu... ..   | 1    | 1 | j21 |
| .....cgcgCgugcuuacugaccuuu... ..    | 1    | 1 | j21 |
| .....cgcgggugcuuacugaccuuA... ..    | 5    | 1 | j21 |
| .....cgcgggAgcuuacugaccuuu... ..    | 3    | 1 | j21 |
| .....cgcgggugcuuacugaccUuuu... ..   | 2    | 1 | j21 |
| .....cgcgggugcuuacGgaccuuu... ..    | 1    | 1 | j21 |
| .....cgcgggugcuuacugaccuuuC... ..   | 2    | 1 | j21 |
| .....cCcgggugcuuacugaccuuu... ..    | 1    | 1 | j21 |
| .....cgcgggugcuuGugaccuuu... ..     | 1    | 1 | j21 |
| .....cgcgggugcuuacugaccuuu... ..    | 189  | 0 | j21 |
| .....Ucgggugcuuacugaccuuu... ..     | 1    | 1 | j21 |
| .....cgcgggGcguuacugaccuuu... ..    | 11   | 1 | j21 |
| .....cgcgggugcuuacugaUccuuu... ..   | 1    | 1 | j21 |
| .....cgcgCugcuuacugaccuuu... ..     | 1    | 1 | j21 |
| .....cgcgggugUuuacugaccuuu... ..    | 1    | 1 | j21 |
| .....cgcgggGcguuacugaccuuu... ..    | 8    | 1 | j21 |
| .....cgcgggugcuuacugaccuuuA... ..   | 86   | 1 | j21 |
| .....cgcgggugcuuacugaccuuuU... ..   | 12   | 1 | j21 |
| .....cgcgggugcuuacugaccuuuA... ..   | 7    | 1 | j21 |
| .....cgcgggugcuuacugaccuuuGa... ..  | 1    | 1 | j21 |
| .....cgcgggugcuuacugaccuuuuaA... .. | 1    | 1 | j21 |
| .....cgcgggugcuuacugaccuuuUu... ..  | 1    | 1 | j21 |
| .....gcgggugcuuAaugaccuu... ..      | 1    | 1 | j21 |
| .....gcgggugcuuacugaccuu... ..      | 3    | 0 | j21 |
| .....gcgggGcguuacugaccuu... ..      | 1    | 1 | j21 |
| .....gcgggugcuuacugaccuuu... ..     | 13   | 0 | j21 |
| .....gcgggugcuuacugaccuuGu... ..    | 1    | 1 | j21 |
| .....gcgggugcuuacugaccuuGu... ..    | 1    | 1 | j21 |
| .....gcgggGcguuacugaccuuu... ..     | 2    | 1 | j21 |

cuaccgggucggaguuagcucaagcgguuaccuccuacugcgggacuuucuaucuguccaucucugucgggguuucgagaccgcgggugcuuacugaccuuuuuug

|                                     |     |   |     |
|-------------------------------------|-----|---|-----|
| .....gcgggCgcuuacugaccuuu...        | 1   | 1 | j21 |
| .....gcgggugcGuacugaccuuu...        | 1   | 1 | j21 |
| .....gcgggugcuuacugaAccuuu...       | 1   | 1 | j21 |
| .....gcgggugcuuacugaccuuu...        | 1   | 1 | j21 |
| .....gcgggugcuuacugaccuuu...        | 4   | 0 | j21 |
| .....cAgggugcuuacugaccuuu...        | 1   | 1 | j21 |
| .....cgggugcuuacugaccuuuA...        | 1   | 1 | j21 |
| .....gggugcuuacugaccuuu...          | 1   | 0 | j21 |
| ..accgggucggaguuagc.....            | 2   | 0 | j07 |
| ..ccgggucggaguuagcucaagcggua.....   | 1   | 1 | j07 |
| ...cgggucggaguuagcuAaagc.....       | 1   | 1 | j07 |
| ...cgggucggaguuagcucaagcg.....      | 1   | 0 | j07 |
| ...ccgggCcgaguuagcucaagcgg.....     | 1   | 1 | j07 |
| ...ccgggucggaguuagcucaagcgg.....    | 4   | 0 | j07 |
| ...ccgggGcggaguuagcucaagcgg.....    | 1   | 1 | j07 |
| ...cGgggucggaguuagcucaagcgg.....    | 1   | 1 | j07 |
| ...ccgggucggaguuagcucaagcggA.....   | 2   | 1 | j07 |
| ...ccgggucggaguuagcucUagcgg.....    | 1   | 1 | j07 |
| ...ccgggucggaguuagcucaagcgg.....    | 7   | 0 | j07 |
| ...ccgggucggCguuagcucaagcgguu.....  | 1   | 1 | j07 |
| ...ccgggucggaguuagcucaagcggua.....  | 5   | 1 | j07 |
| ...ccgggucggaguuagcucaagcgguuA..... | 2   | 0 | j07 |
| ...cgggucggaguuagcucaag.....        | 6   | 0 | j07 |
| ...cgggucggaguuagcucaagc.....       | 2   | 0 | j07 |
| ...cgggCcgaguuagcucaagcg.....       | 1   | 1 | j07 |
| ...cgggucggaguuagcucCagcg.....      | 1   | 1 | j07 |
| ...cgggucggaguuagcucaagcg.....      | 20  | 0 | j07 |
| ...cgggucggaguuagcucaagcgg.....     | 194 | 0 | j07 |
| ...cgggucggaguuagcucaaaUcgg.....    | 1   | 1 | j07 |
| ...cgggucggCguuagcucaagcgg.....     | 1   | 1 | j07 |
| ...cgggCcgaguuagcucaagcgg.....      | 1   | 1 | j07 |
| ...Ugggucggaguuagcucaagcgg.....     | 1   | 1 | j07 |
| ...cgggucggaguuagcucaagcggA.....    | 4   | 1 | j07 |
| ...cgggucgggAUuagcucaagcgg.....     | 1   | 1 | j07 |
| ...cgggGcggaguuagcucaagcgg.....     | 4   | 1 | j07 |
| ...Ggggucggaguuagcucaagcgg.....     | 3   | 1 | j07 |
| ...cgggucggagucCagcucaagcgg.....    | 2   | 1 | j07 |
| ...cgggucggaguuagcucaagcgg.....     | 2   | 1 | j07 |
| ...cgggucggGguuagUucaagcgg.....     | 1   | 1 | j07 |
| ...cgggucggaguuagUucaagcgg.....     | 2   | 1 | j07 |
| ...cgggAcggaguuagcucaagcgg.....     | 3   | 1 | j07 |
| ...cgggucggaguuagcCcaagcgg.....     | 1   | 1 | j07 |
| ...cgggucggaguuagcucaagcggU.....    | 2   | 1 | j07 |
| ...cgggucggagCuagcucaagcgg.....     | 1   | 1 | j07 |
| ...cgggucgggAUuagcucaagcgg.....     | 1   | 1 | j07 |
| ...cgggucggagGUagcucaagcgg.....     | 5   | 1 | j07 |
| ...cgggucggaguuagcucaagcUg.....     | 1   | 1 | j07 |
| ...cgggucggaguuUgcucaagcgg.....     | 1   | 1 | j07 |
| ...cgggucggUguuagcucaagcgg.....     | 1   | 1 | j07 |
| ...cgggucggaguuagcuAaagcgg.....     | 1   | 1 | j07 |
| ...cgggucggaguuagAUcaagcgg.....     | 1   | 1 | j07 |
| ...cgggucgUaguagcucaagcgg.....      | 1   | 1 | j07 |
| ...cgggAcggaguuagcucaagcgg.....     | 6   | 1 | j07 |
| ...cgggucggaguuagcucaagcggC.....    | 10  | 1 | j07 |
| ...cgggucgCaguagcucaagcgg.....      | 1   | 1 | j07 |
| ...cgggGcggaguuagcucaagcgg.....     | 19  | 1 | j07 |
| ...Ugggucggaguuagcucaagcgg.....     | 5   | 1 | j07 |
| ...cgggucggaguuagcucaagcggG.....    | 1   | 1 | j07 |
| ...cgggucggaguuagcucaaaUcgg.....    | 2   | 1 | j07 |
| ...cgggucggagGUagcucaagcgg.....     | 1   | 1 | j07 |
| ...Agggucggaguuagcucaagcgg.....     | 2   | 1 | j07 |
| ...cgggucggaguuagcucaagcgg.....     | 505 | 0 | j07 |
| ...cgggucggCguuagcucaagcgg.....     | 6   | 1 | j07 |
| ...cgggucgggAUuagcucaagcgg.....     | 1   | 1 | j07 |
| ...cgggucggaguuAUucaagcgg.....      | 2   | 1 | j07 |
| ...cgggucggaguuAagcucaagcgg.....    | 1   | 1 | j07 |
| ...Ggggucggaguuagcucaagcgg.....     | 33  | 1 | j07 |
| ...cgUgucggaguuagcucaagcgg.....     | 1   | 1 | j07 |

cuaccgggucgggaguuagcucaagcgguuaccuccuacugcggacuuucuaucuguccaucucugucgggguuucgagaccgcgggugcuuacugaccuuuuuag

|                                             |     |   |     |
|---------------------------------------------|-----|---|-----|
| .....cgggucggUguuagcucaagcgggu.....         | 1   | 1 | j07 |
| .....cgggucgggaguuGgcucaagcgggu.....        | 1   | 1 | j07 |
| .....cgggucgggaguuagcucUagcgggu.....        | 1   | 1 | j07 |
| .....cgggucgggaCuuaagcucaagcgggu.....       | 1   | 1 | j07 |
| .....cgggucgggaguuagcucaagcCgu.....         | 3   | 1 | j07 |
| .....cgggucgggaguuagcuLaagcgggu.....        | 1   | 1 | j07 |
| .....cggguLaggaguuagcucaagcgggu.....        | 6   | 1 | j07 |
| .....cgggucgggaguuagcucaagGgggu.....        | 2   | 1 | j07 |
| .....cgggucgggaguuagcucGagcgggu.....        | 1   | 1 | j07 |
| .....cgggucggGguuagcucaagcgggu.....         | 1   | 1 | j07 |
| .....cgggucggagCuagcucaagcgggu.....         | 2   | 1 | j07 |
| .....cgggucgggaguuagcucCagcgggu.....        | 2   | 1 | j07 |
| .....cgggCcggaguuagcucaagcgggu.....         | 3   | 1 | j07 |
| .....cgggucgggaguuagcucaagcUgu.....         | 2   | 1 | j07 |
| .....cgggucgggaguuagcucaagcAgu.....         | 1   | 1 | j07 |
| .....cgggucgggaguuA Ccucaagcgggu.....       | 1   | 1 | j07 |
| .....cgggucgggaguuagcucaagcggA.....         | 25  | 1 | j07 |
| .....cgggucgggaguuagcuGaaagcgggu.....       | 1   | 1 | j07 |
| .....cgggucgggaguuagcucaagAaggu.....        | 1   | 1 | j07 |
| .....cgggucgggaguuagcucaagcGUuu.....        | 2   | 1 | j07 |
| .....cgggucggGguuagcucaagcggguu.....        | 2   | 1 | j07 |
| .....cgggucgggaguuagcucaagcggguC.....       | 2   | 1 | j07 |
| .....cgggucggGguuagcucaagcgggu.....         | 1   | 1 | j07 |
| .....cggguLaggaguuagcucaagcggguu.....       | 1   | 1 | j07 |
| .....cgggucgggaguuagcucaaUcgggu.....        | 2   | 1 | j07 |
| .....cgggucgggaguuagcucaagcggguA.....       | 81  | 1 | j07 |
| .....cgggucgggaguuagcucaagcggguu.....       | 109 | 0 | j07 |
| .....cgggucgggaguuagcucaagcggCu.....        | 2   | 1 | j07 |
| .....cgggucgggaguuagcuLaagcggguu.....       | 1   | 1 | j07 |
| .....cgggucgggaguuagcucaUgcgggu.....        | 1   | 1 | j07 |
| .....cgggucLagaguuagcucaagcgggu.....        | 1   | 1 | j07 |
| .....Ggggucgggaguuagcucaagcgggu.....        | 1   | 1 | j07 |
| .....cgggucgggaguuagcucCagcgggu.....        | 2   | 1 | j07 |
| .....cgggCcggaguuagcucaagcgggu.....         | 2   | 1 | j07 |
| .....cgggucgggaguuagcucaagcgggu.....        | 2   | 1 | j07 |
| .....cgggCcggaguuagcucaagcgggu.....         | 6   | 1 | j07 |
| .....Lagggucgggaguuagcucaagcgggu.....       | 1   | 1 | j07 |
| .....Ugggucgggaguuagcucaagcgggu.....        | 1   | 1 | j07 |
| .....cgggucgggagCuagcucaagcgggu.....        | 1   | 1 | j07 |
| .....cgggucgggaguuagcucaagcggguA.....       | 24  | 1 | j07 |
| .....cgggucgggaguuagcucaagcggguu.....       | 1   | 1 | j07 |
| .....cgggucgggaguuagcucaagcggguU.....       | 26  | 1 | j07 |
| .....cgggucgggaguuagcucaagcggguu.....       | 12  | 0 | j07 |
| .....cgggucgggaguuagcucaagcggguu.....       | 1   | 1 | j07 |
| .....cgggucgggaguuagcucaagcggguuA.....      | 2   | 1 | j07 |
| .....cUgggucgggaguuagcucaagcggguuaccuc..... | 2   | 1 | j07 |
| .....gggucgggaguuagcucaagc.....             | 2   | 0 | j07 |
| .....gggucgggaguuagcucaagc.....             | 2   | 0 | j07 |
| .....gggucggGguuagcucaagc.....              | 1   | 1 | j07 |
| .....ggguLaggaguuagcucaagc.....             | 1   | 1 | j07 |
| .....gggucgggaguuagcucaaUcgg.....           | 1   | 1 | j07 |
| .....gggucgggaguuagcucGagcucagc.....        | 1   | 1 | j07 |
| .....gggucgggaUuuagcucaagc.....             | 1   | 1 | j07 |
| .....gggucgggaguuA Ccucaagc.....            | 1   | 1 | j07 |
| .....gggucggUguuagcucaagc.....              | 2   | 1 | j07 |
| .....gggCcggaguuagcucaagc.....              | 1   | 1 | j07 |
| .....gggucUgaguuagcucaagc.....              | 1   | 1 | j07 |
| .....gggucLagaguuagcucaagc.....             | 1   | 1 | j07 |
| .....ggguGggaguuagcucaagc.....              | 1   | 1 | j07 |
| .....gggucgggaguuagcucaagc.....             | 140 | 0 | j07 |
| .....gggucgggaguuagcucaGgc.....             | 1   | 1 | j07 |
| .....gCgucgggaguuagcucaagc.....             | 1   | 1 | j07 |
| .....gggucgggaguuagcucaUgc.....             | 1   | 1 | j07 |
| .....gggucgggaguuagUuuagc.....              | 1   | 1 | j07 |
| .....gggucgggaguuagcucaagc.....             | 2   | 1 | j07 |
| .....gggucgggaguuagcucCagc.....             | 1   | 1 | j07 |
| .....gAgucgggaguuagcucaagc.....             | 1   | 1 | j07 |
| .....gggucgggaguuUgcucaagc.....             | 1   | 1 | j07 |
| .....gggucgggaguuCgcucaagc.....             | 1   | 1 | j07 |

cuaccgggucgggaguuagcucaagcgguuaccuccuacugcgggacuuucuaucuguccaucucugugcgggguucgagaccgcgggugcuuacugaccuuuuuag

|                                       |     |   |     |
|---------------------------------------|-----|---|-----|
| .....gggAcggaguuagcucaagcgg.....      | 3   | 1 | j07 |
| .....gggucgggaguuagcucaCgCGG.....     | 1   | 1 | j07 |
| .....gggGcggaguuagcucaagcgg.....      | 9   | 1 | j07 |
| .....gggucgggaguuagcucaagUggu.....    | 2   | 1 | j07 |
| .....gUgucgggaguuagcucaagcgggu.....   | 1   | 1 | j07 |
| .....gggucgggaguuagcAcaagcgggu.....   | 1   | 1 | j07 |
| .....gggucgggaguuagcucaagcggUu.....   | 2   | 1 | j07 |
| .....gggucgggGguuagcucaagcgggu.....   | 5   | 1 | j07 |
| .....gggucgggaguuagcucaagcggG.....    | 5   | 1 | j07 |
| .....gggCcgaguuagcucaagcgggu.....     | 14  | 1 | j07 |
| .....gggucgggaguuagcuUaagcgggu.....   | 1   | 1 | j07 |
| .....gggucgggaguuagcAuaagcgggu.....   | 4   | 1 | j07 |
| .....gggAcggaguuagcucaagcgggu.....    | 4   | 1 | j07 |
| .....gAgucgggaguuagcucaagcgggu.....   | 3   | 1 | j07 |
| .....gggucgggagUGagcucaagcgggu.....   | 2   | 1 | j07 |
| .....gggucgggagUCagcucaagcgggu.....   | 2   | 1 | j07 |
| .....gggucgggaguuGgcucaagcgggu.....   | 2   | 1 | j07 |
| .....gggucgggaguuagcucaagAggu.....    | 1   | 1 | j07 |
| .....ggguAggaguuagcucaagcgggu.....    | 2   | 1 | j07 |
| .....Cggucgggaguuagcucaagcgggu.....   | 1   | 1 | j07 |
| .....gggucgggaguuagUucaagcgggu.....   | 3   | 1 | j07 |
| .....gggucgggaguuagcucaagGggu.....    | 2   | 1 | j07 |
| .....gggucgggaguuAucuaagcgggu.....    | 5   | 1 | j07 |
| .....gggucgggaguuagcucaCgCGG.....     | 2   | 1 | j07 |
| .....gggucgggagCUagcucaagcgggu.....   | 2   | 1 | j07 |
| .....gggucgggaguuagcuAaagcgggu.....   | 4   | 1 | j07 |
| .....ggguGggaguuagcucaagcgggu.....    | 3   | 1 | j07 |
| .....gggucgggaguuagcucaagcGcU.....    | 3   | 1 | j07 |
| .....gCgucgggaguuagcucaagcgggu.....   | 2   | 1 | j07 |
| .....gggucgggagAuaagcucaagcgggu.....  | 2   | 1 | j07 |
| .....gggucgggaguuagcuGaaagcgggu.....  | 2   | 1 | j07 |
| .....gggucgggaguuagcucaagcgggu.....   | 859 | 0 | j07 |
| .....gggGcggaguuagcucaagcgggu.....    | 38  | 1 | j07 |
| .....Aggucgggaguuagcucaagcgggu.....   | 1   | 1 | j07 |
| .....gggucgggaguuagcucCagcgggu.....   | 2   | 1 | j07 |
| .....gggucgggagGuaagcucaagcgggu.....  | 4   | 1 | j07 |
| .....gggucgggaguuagcucaagcggC.....    | 13  | 1 | j07 |
| .....gggucgCaguuagcucaagcgggu.....    | 1   | 1 | j07 |
| .....gggucgggUuuagcucaagcgggu.....    | 3   | 1 | j07 |
| .....gggucgggaguuagcucaaCcggu.....    | 2   | 1 | j07 |
| .....ggAucgggaguuagcucaagcgggu.....   | 1   | 1 | j07 |
| .....gggucgggaguuagcucaagcUggu.....   | 1   | 1 | j07 |
| .....gggucgggaguuCgcucaagcgggu.....   | 1   | 1 | j07 |
| .....ggguUggaguuagcucaagcgggu.....    | 3   | 1 | j07 |
| .....gggucgggaguuagcucaagcggA.....    | 35  | 1 | j07 |
| .....gggucgggCguuagcucaagcgggu.....   | 8   | 1 | j07 |
| .....ggCucgggaguuagcucaagcgggu.....   | 2   | 1 | j07 |
| .....gggucgggaguuagcucaCgCGGU.....    | 1   | 1 | j07 |
| .....gggucgggaguuagcucaagcggGU.....   | 6   | 1 | j07 |
| .....gggucgggaguuCgcucaagcgggu.....   | 1   | 1 | j07 |
| .....gggucgggaguuagcucaagcggGU.....   | 1   | 1 | j07 |
| .....gggAcgggaguuagcucaagcgggu.....   | 2   | 1 | j07 |
| .....gggucgggaguuagcucaagcggguA.....  | 370 | 1 | j07 |
| .....gggucgggCguuagcucaagcgggu.....   | 3   | 1 | j07 |
| .....gggGcggaguuagcucaagcgggu.....    | 4   | 1 | j07 |
| .....gggucgggaguuagcuUaagcgggu.....   | 1   | 1 | j07 |
| .....gggucgggaguuagcucaagcgggu.....   | 147 | 0 | j07 |
| .....gggucgggGguuagcucaagcgggu.....   | 1   | 1 | j07 |
| .....Uggucgggaguuagcucaagcgggu.....   | 1   | 1 | j07 |
| .....gggucAggaguuagcucaagcgggu.....   | 1   | 1 | j07 |
| .....gggucgggaguuagcGcaagcgggu.....   | 1   | 1 | j07 |
| .....gggucgggaguuagcucaagcggguG.....  | 3   | 1 | j07 |
| .....gggucgggagCUagcucaagcgggu.....   | 1   | 1 | j07 |
| .....gggucgggaguuagcucaagcggcU.....   | 4   | 1 | j07 |
| .....gggucgggaguuagcucaagcggguU.....  | 82  | 1 | j07 |
| .....gggCcgaguuagcucaagcggguua.....   | 1   | 1 | j07 |
| .....gggucgggaguuagcucaagUggguua..... | 1   | 1 | j07 |
| .....gggucgggaguuagcucaagcggguua..... | 52  | 0 | j07 |
| .....gggucgggaguuagcucaagcggguGa..... | 2   | 1 | j07 |

cuaccgggucggaguuagcucaagcgguuuaccuccuacugcggacuucuaucuguccaucugugcgggguuucgagaccgcggggugcuuacugaccuuuuuag

|                                        |     |   |     |
|----------------------------------------|-----|---|-----|
| .....gggucggaguuagcucaagcggGua.....    | 1   | 1 | j07 |
| .....gggucggaguuagcucaagcgguaa.....    | 72  | 1 | j07 |
| .....gggucggaguuagcucaagcgguuac.....   | 2   | 0 | j07 |
| .....gggucggaguuagcucaagcgguaaA.....   | 1   | 1 | j07 |
| .....gggucggaguuCgcucaagcgguuacc.....  | 1   | 1 | j07 |
| .....gggucggaguuagcucaagcgguuacc.....  | 4   | 0 | j07 |
| .....gggucggaguuagcucaagcgguuaccu..... | 1   | 0 | j07 |
| .....ggucggaguuagcucaagcgggu.....      | 1   | 0 | j07 |
| .....ggaguuagcucaagcggG.....           | 1   | 1 | j07 |
| .....ggaguuagcucaagcgggu.....          | 2   | 0 | j07 |
| .....uaccuccuacugcggacuuu.....         | 1   | 0 | j07 |
| .....cgcgggugcuuacugaccuu.....         | 8   | 0 | j07 |
| .....cgcgggAgcuuacugaccuu.....         | 1   | 1 | j07 |
| .....cgcgggugcuuacugUccuu.....         | 1   | 1 | j07 |
| .....cgcgggugcuuacuAaccuu.....         | 1   | 1 | j07 |
| .....cgcgggAgcuuacugaccuu.....         | 1   | 1 | j07 |
| .....cgcgggugcuuagugaccuu.....         | 1   | 1 | j07 |
| .....cgcgggugcuuacugaccuuA.....        | 2   | 1 | j07 |
| .....cgcgggugcuuacugaccuu.....         | 44  | 0 | j07 |
| .....cgcgggugcuuacugaccuuA.....        | 5   | 1 | j07 |
| .....cgcgggugcuuacugaccuuuu.....       | 3   | 0 | j07 |
| ..accgggucggaguuagcucaagcgggu.....     | 1   | 0 | j14 |
| ..accgggucggaguuagcucaagcgggu.....     | 2   | 0 | j14 |
| ..Accgggucggaguuagcucaagc.....         | 1   | 1 | j14 |
| ..Accgggucggaguuagcucaagcgggu.....     | 2   | 1 | j14 |
| ..ccgggucggaguuagcucaagcgg.....        | 6   | 0 | j14 |
| ..ccgggGcggaguuagcucaagcgg.....        | 1   | 1 | j14 |
| ..ccgggucggaguuagcucaagcgggu.....      | 3   | 0 | j14 |
| ..ccgggucggaguuagcucaagcggA.....       | 1   | 1 | j14 |
| ..cgggGcggaguuagcucaag.....            | 1   | 1 | j14 |
| ..cgggucggaguuagcucaagcg.....          | 7   | 0 | j14 |
| ..cgggucggaguuagcucaagUg.....          | 1   | 1 | j14 |
| ..cgggucggaguuagcuAaagcg.....          | 1   | 1 | j14 |
| ..cgggucggaguuagcucaagcA.....          | 1   | 1 | j14 |
| ..cgggucggaguuagcucaagcgg.....         | 1   | 1 | j14 |
| ..cgggucggCguuagcucaagcgg.....         | 2   | 1 | j14 |
| ..cgggCcgaguuagcucaagcgg.....          | 2   | 1 | j14 |
| ..cgggucggaguuagcuUaagcgg.....         | 1   | 1 | j14 |
| ..cgggucgCaguagcucaagcgg.....          | 1   | 1 | j14 |
| ..cgggucggaguuagcucaagcgg.....         | 3   | 1 | j14 |
| ..cgggucggaguuagcucaagcgu.....         | 1   | 1 | j14 |
| ..Ugggucggaguuagcucaagcgg.....         | 2   | 1 | j14 |
| ..Ggggucggaguuagcucaagcgg.....         | 2   | 1 | j14 |
| ..cgggucggaguuagcucaagcUg.....         | 2   | 1 | j14 |
| ..cgggucggaguuagcucaagcgg.....         | 223 | 0 | j14 |
| ..cgggucggaguuagcucaagUgg.....         | 1   | 1 | j14 |
| ..cgggucggUguagcucaagcgg.....          | 1   | 1 | j14 |
| ..cgggucggaguuagcucaagAgg.....         | 1   | 1 | j14 |
| ..cgggGcggaguuagcucaagcgg.....         | 14  | 1 | j14 |
| ..cgggucggGguuagcucaagcgg.....         | 2   | 1 | j14 |
| ..cgggucggaguuagcucCagcgg.....         | 1   | 1 | j14 |
| ..cgggucggaguuagcucaaAcgg.....         | 1   | 1 | j14 |
| ..cgggucggaguuagcucaaUcgg.....         | 1   | 1 | j14 |
| ..cgggucggagUgagcucaagcgg.....         | 1   | 1 | j14 |
| ..cgggucggaguuagcucaUgcgg.....         | 1   | 1 | j14 |
| ..cgggucggaguuagcuAaagcgg.....         | 2   | 1 | j14 |
| ..cgggucggaguuAucuaagcgg.....          | 1   | 1 | j14 |
| ..cgggucggagGuaagcucaagcgg.....        | 4   | 1 | j14 |
| ..cggAucggaguuagcucaagcgg.....         | 1   | 1 | j14 |
| ..cgggucggaguuagcucaGgcgg.....         | 1   | 1 | j14 |
| ..cgggCcgaguuagcucaagcgggu.....        | 2   | 1 | j14 |
| ..cgggAcggaguuagcucaagcgggu.....       | 2   | 1 | j14 |
| ..cgggucggaguuagcucaaUcgggu.....       | 2   | 1 | j14 |
| ..cgggucggagCuagcucaagcgggu.....       | 3   | 1 | j14 |
| ..cgggucggaguuAucuaagcgggu.....        | 3   | 1 | j14 |
| ..cgggucggaguuagcucaagUgggu.....       | 3   | 1 | j14 |
| ..cgggucggCguuagcucaagcgggu.....       | 1   | 1 | j14 |
| ..cgggucggaguuagcucaagcggC.....        | 8   | 1 | j14 |

cuaccgggucgggaguuagcucaagcgguuaccuccuacugcgggacuuucuaucuguccaucucugucgggguuucgagaccgcggggucuuacugaccuuuuuag

|                                        |     |   |     |
|----------------------------------------|-----|---|-----|
| .....cgggGcggaguuagcucaagcgggu.....    | 17  | 1 | j14 |
| .....cgggucgggaguuagcCcaagcgggu.....   | 2   | 1 | j14 |
| .....cgggucgggaguuagUucaagcgggu.....   | 2   | 1 | j14 |
| .....cgggucGcaguuagcucaagcgggu.....    | 1   | 1 | j14 |
| .....cgggucggUguuagcucaagcgggu.....    | 3   | 1 | j14 |
| .....cgUgucgggaguuagcucaagcgggu.....   | 2   | 1 | j14 |
| .....cgggucgggaguuagcucaagcUgu.....    | 3   | 1 | j14 |
| .....cgggucgggaguuagcucaaCcggu.....    | 1   | 1 | j14 |
| .....cgggucgggaguuagcuAaagcgggu.....   | 2   | 1 | j14 |
| .....cgggucgggaguuagcAcaagcgggu.....   | 1   | 1 | j14 |
| .....cgggucgggaguuagcucaagcgggu.....   | 300 | 0 | j14 |
| ....Aaggucgggaguuagcucaagcgggu.....    | 1   | 1 | j14 |
| .....cgggucgggagUuagcucaagcgggu.....   | 5   | 1 | j14 |
| .....cgggucgggaguuagcucaaAacgggu.....  | 1   | 1 | j14 |
| .....cgggucgggaguuagcucaagcggUu.....   | 1   | 1 | j14 |
| .....cgggucgggaguuagcucaUgcgggu.....   | 2   | 1 | j14 |
| .....cgggucgggaguuagcucaagcggG.....    | 4   | 1 | j14 |
| .....Ugggucgggaguuagcucaagcgggu.....   | 1   | 1 | j14 |
| .....cgggucgggaguuagcucaagcggA.....    | 8   | 1 | j14 |
| .....cgggucgggaguuagcucaCgcgggu.....   | 1   | 1 | j14 |
| .....cgggucgUaguuagcucaagcgggu.....    | 1   | 1 | j14 |
| .....cAaggucgggaguuagcucaagcgggu.....  | 1   | 1 | j14 |
| .....cgggucgggaguuagcucaagcgggu.....   | 49  | 0 | j14 |
| .....cgggucgggaguuagcucUagcgggu.....   | 1   | 1 | j14 |
| .....cgggucgggaguuagcucaagcggguA.....  | 18  | 1 | j14 |
| .....cgggucgggaguuagcucaCgcgggu.....   | 1   | 1 | j14 |
| .....cgggGcggaguuagcucaagcgggu.....    | 3   | 1 | j14 |
| .....cgggucgggaguuagcucaagcgguuU.....  | 19  | 1 | j14 |
| .....cgggucgggaguuagcucaagcggguua..... | 2   | 0 | j14 |
| .....cgggucgggaguuagcucaagcggguAa..... | 5   | 1 | j14 |
| .....gggucgggaguuagcucCagcgg.....      | 1   | 1 | j14 |
| .....gggucgggaguuagcucaagcgg.....      | 2   | 1 | j14 |
| .....gggGcggaguuagcucaagcgggu.....     | 2   | 1 | j14 |
| .....gggucgggaguuagcucaagcgggu.....    | 14  | 0 | j14 |
| .....gggucgggaguuagcucaagcggG.....     | 2   | 1 | j14 |
| .....Uggucgggaguuagcucaagcgggu.....    | 1   | 1 | j14 |
| .....gggucgggaguuagUucaagcgggu.....    | 1   | 1 | j14 |
| .....gggucgggaguuagcucaagcggUuu.....   | 1   | 1 | j14 |
| .....ggguGggaguuagcucaagcgggu.....     | 1   | 1 | j14 |
| .....gggucgggaguuagcucaagcgggu.....    | 10  | 0 | j14 |
| .....gggucgggaguuagcucaagcggguua.....  | 1   | 0 | j14 |
| .....gggucgggaguuagcucaagcggguU.....   | 3   | 1 | j14 |
| .....ggaguuagcucaagcgggu.....          | 2   | 0 | j14 |
| .....cugucuggggguucgagac.....          | 1   | 0 | j14 |
| .....cgcgggugcuuacugaccuu.....         | 1   | 0 | j14 |
| .....cgcgggugcuuaUugaccuu.....         | 1   | 1 | j14 |
| .....cgcgggGgcuuacugaccuu.....         | 2   | 1 | j14 |
| .....cgcgggAgcuuacugaccuu.....         | 1   | 1 | j14 |
| .....cgcgggugcuuacugaccuu.....         | 12  | 0 | j14 |
| .....cgcgggugUuacugaccuu.....          | 1   | 1 | j14 |
| .....cgcgggugcuuGcugaccuu.....         | 1   | 1 | j14 |
| .....cgcgggAgcuuacugaccuu.....         | 5   | 1 | j14 |
| .....cgcgggCgcuuacugaccuu.....         | 1   | 1 | j14 |
| .....cgcgggugcuuCugaccuu.....          | 1   | 1 | j14 |
| .....cgcgggugcuuacugaccuu.....         | 22  | 0 | j14 |
| .....cgcgggugcuuacugaccAuu.....        | 1   | 1 | j14 |
| .....cgcgggugcuuacugaccCuu.....        | 1   | 1 | j14 |
| .....cgAgggugcuuacugaccuu.....         | 1   | 1 | j14 |
| .....cgcgggugcuuacugaccuu.....         | 4   | 0 | j14 |
| .....cgcgggugcuuacugaccuuA.....        | 1   | 1 | j14 |
| .....cgcgggugcuuacugaccuuAau.....      | 1   | 1 | j14 |
| ....cccgggucgggaguuagcucaagcggA.....   | 1   | 1 | k02 |
| .....cgggucgggaguuagcucaagcgg.....     | 11  | 0 | k02 |
| .....cgggucgggaguuagcucaCgcgg.....     | 1   | 1 | k02 |
| .....cgggucgggaguuagcucaagcgggu.....   | 19  | 0 | k02 |
| .....cgggucgggaguuagcucaagcggA.....    | 1   | 1 | k02 |
| .....cggUucgggaguuagcucaagcgggu.....   | 1   | 1 | k02 |
| .....cgggucgggaguuagcucaagcgggu.....   | 1   | 1 | k02 |

cuaccgggucggaguuagcucaagcgguuaccuccuacugcggacuucuaucuguccaucucugucgggguuucgagaccgcgggugcuuacugacccuuuaug

|                                       |    |   |     |
|---------------------------------------|----|---|-----|
| .....cgggucggaguuagcucaagcgguu.....   | 2  | 0 | k02 |
| .....cgggucggaguuagcucaagcgguuU.....  | 1  | 1 | k02 |
| .....gggucggaguuagcucaagcgg.....      | 3  | 0 | k02 |
| .....gggucggaguuagcucaagcggU.....     | 5  | 0 | k02 |
| .....gggucggaguuagcucaagcggG.....     | 1  | 1 | k02 |
| .....ggguAggaguuagcucaagcgguu.....    | 1  | 1 | k02 |
| .....gggucggaguuGgcucaagcgguu.....    | 1  | 1 | k02 |
| .....gggucggaguuagcucaagcgguu.....    | 19 | 0 | k02 |
| .....gggucggaguuGagcucaagcgguu.....   | 1  | 1 | k02 |
| .....gggucggaguuagcucaagcggG.....     | 1  | 1 | k02 |
| .....cgcgggugcuuacugacAcu.....        | 1  | 1 | k02 |
| .....cgcgggugcuuacugacccuu.....       | 8  | 0 | k02 |
| .....cgcgggugcuuGcugacccuu.....       | 1  | 1 | k02 |
| .....cgcgggGcguuacugacccuu.....       | 1  | 1 | k02 |
| .....cgcgggugcuuacuAacccuu.....       | 1  | 1 | k02 |
| .....cgcgggugcuuacugacccuu.....       | 3  | 0 | k02 |
| .....cgcgggugcuuacugacccuu.....       | 1  | 0 | k02 |
| .....cgcgggugcuuGcugacccuu.....       | 1  | 1 | k02 |
| .....cAgggucggaguuagcucaagcgg.....    | 1  | 1 | j28 |
| .....ccgggucggaguuagcucaagcgg.....    | 3  | 0 | j28 |
| .....cgggucggaguuagcucaag.....        | 1  | 0 | j28 |
| .....cgggucggaguuagcucaagcg.....      | 4  | 0 | j28 |
| .....Ugggucggaguuagcucaagcg.....      | 2  | 1 | j28 |
| .....cgggucggUguuagcucaagcgg.....     | 1  | 1 | j28 |
| .....cgggucggaguuagcucaagcG.....      | 1  | 1 | j28 |
| .....cgggucggaguuagcucaagcgg.....     | 34 | 0 | j28 |
| .....cgggucggaguuagcucaagcggU.....    | 18 | 0 | j28 |
| .....cgggucggaguuagcucaagcggA.....    | 4  | 1 | j28 |
| .....cgggucggaguuagcucaagcggU.....    | 2  | 1 | j28 |
| .....gggucggaguuagcucaagcgg.....      | 9  | 0 | j28 |
| .....gggucggaguuagcucaagcggU.....     | 9  | 0 | j28 |
| .....gggucggaguuagcucaagcgguu.....    | 3  | 0 | j28 |
| .....gggAcggaguuagcucaagcgguu.....    | 1  | 1 | j28 |
| .....cgcgggugcuuacugacccuu.....       | 4  | 0 | j28 |
| .....cgcgggugcuuacugacccuuA.....      | 1  | 1 | j28 |
| .....accgggucggaguuagcucaa.....       | 1  | 0 | s08 |
| .....accgggucggaguuagcucaagcg.....    | 1  | 0 | s08 |
| .....accgggucggaguuagcucaagcAg.....   | 1  | 1 | s08 |
| .....accgggucggaguuagcucaagcgg.....   | 7  | 0 | s08 |
| .....accgggucggaguuagcucaagcggU.....  | 8  | 0 | s08 |
| .....accgggucggaguuagcucaagcggA.....  | 1  | 1 | s08 |
| .....accgggucggaguuagcucaagcgguu..... | 1  | 0 | s08 |
| .....Accgggucggaguuagcucaagcgg.....   | 2  | 1 | s08 |
| .....cccgggucggaguuagcucaagcgg.....   | 7  | 0 | s08 |
| .....cccgggucggaguuagcucaagcggU.....  | 2  | 0 | s08 |
| .....AccgggucggaguuagcucaagcggU.....  | 5  | 1 | s08 |
| .....ccgggucggaguuagcucaag.....       | 1  | 0 | s08 |
| .....cgggucggaguuagcucaagcg.....      | 1  | 0 | s08 |
| .....Ugggucggaguuagcucaagcgg.....     | 2  | 1 | s08 |
| .....cgggucggaguuagcucaagUgg.....     | 1  | 1 | s08 |
| .....Ucgggucggaguuagcucaagcgg.....    | 4  | 1 | s08 |
| .....cgggucggaguuagcucaagcgg.....     | 93 | 0 | s08 |
| .....ccgggucggaguuagcucaaCgg.....     | 1  | 1 | s08 |
| .....ccgggucggaguuagcucaaAcgg.....    | 1  | 1 | s08 |
| .....cgggucggaguuUgcucaagcgg.....     | 2  | 1 | s08 |
| .....ccgggucUgaguuagcucaagcgg.....    | 1  | 1 | s08 |
| .....cgggucggaguuagcucaagcGU.....     | 1  | 1 | s08 |
| .....ccgggucggaguuCagcucaagcggU.....  | 1  | 1 | s08 |
| .....UcgggucggaguuagcucaagcggU.....   | 9  | 1 | s08 |
| .....cgggucggaguuagcucaagcggA.....    | 5  | 1 | s08 |
| .....ccgggucggaguuacCucaagcggU.....   | 1  | 1 | s08 |
| .....cgggucggaguuagcucaagcUgu.....    | 2  | 1 | s08 |
| .....ccgggucggaguuagcucaCgcggU.....   | 1  | 1 | s08 |
| .....cgggucgCaguuagcucaagcggU.....    | 1  | 1 | s08 |
| .....ccggguUggaguuagcucaagcggU.....   | 1  | 1 | s08 |
| .....cgggucggaguuagcucaagcggU.....    | 1  | 1 | s08 |
| .....cUgggucggaguuagcucaagcggU.....   | 2  | 1 | s08 |

cuaccgggucggaguuagcucaagcgguuaccuccuacugcggacuuucuaucuguccaucucugugcgggguuucgagaccgcgggugcuuacugaccuuuuuag

|                                     |      |   |     |
|-------------------------------------|------|---|-----|
| ...ccgggucggaguuagcucaagUggU.....   | 1    | 1 | s08 |
| ...ccgggucggaguuagcucaagcggU.....   | 209  | 0 | s08 |
| ...ccgggucggaguuagcucUagcggU.....   | 2    | 1 | s08 |
| ...ccgggucggaguuagcucaagcggU.....   | 11   | 0 | s08 |
| ...ccgggucggaguuagcucaagcggUΔ.....  | 11   | 1 | s08 |
| ...ccgggucggaguuagcucaagcggΔU.....  | 2    | 1 | s08 |
| ...ccgggucggaguuagcucaagcggUΔΔ..... | 3    | 1 | s08 |
| ...ccgggucggaguuagcucaagcggUU.....  | 1    | 1 | s08 |
| ...cgggucggaguuagcucaag.....        | 8    | 0 | s08 |
| ...cgggucggaguuagcucaagU.....       | 1    | 1 | s08 |
| ...cgggucggaguuagcucaagc.....       | 12   | 0 | s08 |
| ...cgggucggaguuagcucaagcg.....      | 60   | 0 | s08 |
| ...cgggucggaguuagcucaagcΔ.....      | 1    | 1 | s08 |
| ...cgggucgggAUuuagcucaagcg.....     | 1    | 1 | s08 |
| ...Ggggucggaguuagcucaagcg.....      | 1    | 1 | s08 |
| ...cgggucggaguuGgcucaagcgg.....     | 1    | 1 | s08 |
| ...cgggucggaguuagcuΔaagcgg.....     | 1    | 1 | s08 |
| ...cgggucggaguuagcucaUgcgg.....     | 8    | 1 | s08 |
| ...cgUgucggaguuagcucaagcgg.....     | 2    | 1 | s08 |
| ...cgggucggaguuagcucaagcggΔ.....    | 5    | 1 | s08 |
| ...cgggucggGguuuagcucaagcgg.....    | 1    | 1 | s08 |
| ...cgggucgUaguuagcucaagcgg.....     | 2    | 1 | s08 |
| ...cgggucggaguuagcucaagcCg.....     | 6    | 1 | s08 |
| ...cUggucggaguuagcucaagcgg.....     | 3    | 1 | s08 |
| ...cgggucggaguuagcucaagcgg.....     | 2692 | 0 | s08 |
| ...cgggucggaguuagcucaagcggC.....    | 5    | 1 | s08 |
| ...cgggucggaguuagcucaagcUg.....     | 12   | 1 | s08 |
| ...cggΔucggaguuagcucaagcgg.....     | 1    | 1 | s08 |
| ...cgggucΔaguuagcucaagcgg.....      | 1    | 1 | s08 |
| ...cgggucggaguuAUcucaagcgg.....     | 3    | 1 | s08 |
| ...cgggucggaguuagcucUagcgg.....     | 6    | 1 | s08 |
| ...cgggCcgaguuagcucaagcgg.....      | 1    | 1 | s08 |
| ...cgggucggaguuagcΔaagcgg.....      | 1    | 1 | s08 |
| ...cΔggucggaguuagcucaagcgg.....     | 2    | 1 | s08 |
| ...Ugggucggaguuagcucaagcgg.....     | 6    | 1 | s08 |
| ...cgggucggaguuagcucaGcgg.....      | 2    | 1 | s08 |
| ...cgggucggCguuuagcucaagcgg.....    | 1    | 1 | s08 |
| ...cggUucggaguuagcucaagcgg.....     | 1    | 1 | s08 |
| ...cgggucggaguuagcucaagΔgg.....     | 1    | 1 | s08 |
| ...cgggucgggAUuagcucaagcgg.....     | 1    | 1 | s08 |
| ...cgggucgggAUuagcucaagcgg.....     | 1    | 1 | s08 |
| ...cgggucgggAUuagcucaagcgg.....     | 3    | 1 | s08 |
| ...cgggucgΔaguuagcucaagcgg.....     | 1    | 1 | s08 |
| ...cgggucggaguuagcucaagcggU.....    | 16   | 1 | s08 |
| ...cgggucggagucAgcucaagcgg.....     | 1    | 1 | s08 |
| ...cgggucggaguuagcucaCgcgg.....     | 13   | 1 | s08 |
| ...Ggggucggaguuagcucaagcgg.....     | 1    | 1 | s08 |
| ...cgggucggaguuagcucaaUcgg.....     | 6    | 1 | s08 |
| ...cgCgucggaguuagcucaagcgg.....     | 1    | 1 | s08 |
| ...cgggucggaguuagUucaagcgg.....     | 3    | 1 | s08 |
| ...cgggucggaguuagcuGaaagcgg.....    | 1    | 1 | s08 |
| ...cgggucggaguuagcuUaagcgg.....     | 6    | 1 | s08 |
| ...cgggucggaguuagcucaagUgg.....     | 1    | 1 | s08 |
| ...cgggucggaguuagGuaagcgg.....      | 1    | 1 | s08 |
| ...cgggucggaguuagcucaagcΔg.....     | 10   | 1 | s08 |
| ...cgggGcggaguuagcucaagcgg.....     | 3    | 1 | s08 |
| ...cgggucggUguuuagcucaagcgg.....    | 1    | 1 | s08 |
| ...cgggucggaguuAΔcucaagcgg.....     | 1    | 1 | s08 |
| ...cgggucggaguuagΔucaagcgg.....     | 1    | 1 | s08 |
| ...cgggucggaguuagcucCagcgg.....     | 5    | 1 | s08 |
| ...cgggucggaguuagcucaagUggU.....    | 3    | 1 | s08 |
| ...cgggucggaguuagΔucaagcggU.....    | 1    | 1 | s08 |
| ...cgggucgggAUuagcucaagcggU.....    | 3    | 1 | s08 |
| ...UgggucggaguuagcucaagcggU.....    | 25   | 1 | s08 |
| ...cgggucggaguuagcucaagΔggU.....    | 4    | 1 | s08 |
| ...cgggucggaguuagcucaagcggU.....    | 12   | 1 | s08 |
| ...cgggucggaguuagcΔcaagcggU.....    | 3    | 1 | s08 |
| ...cgggucggaguuagcucaagGggU.....    | 2    | 1 | s08 |
| ...cgUgucggaguuagcucaagcggU.....    | 10   | 1 | s08 |



cuaccgggucgggaguuagcucaagcgguuaccuccuacugcggacuucuaucuguccaucucugucgggguuucgagaccgcgggugcuuacugaccuuuuuug

|                                       |      |   |     |
|---------------------------------------|------|---|-----|
| .....Ggggucgggaguuagcucaagcgggu.....  | 6    | 1 | s08 |
| .....cgggucgggaguuagcucaaUcgggu.....  | 23   | 1 | s08 |
| .....cggguAggaguuagcucaagcgggu.....   | 1    | 1 | s08 |
| .....cgggucAggaguuagcucaagcgggu.....  | 3    | 1 | s08 |
| .....cgggucgggaguuUcucaaagcgggu.....  | 5    | 1 | s08 |
| .....cgggucgggaguuagcucCagcgggu.....  | 11   | 1 | s08 |
| .....cCggucgggaguuagcucaagcgggu.....  | 4    | 1 | s08 |
| .....cggUcgggaguuagcucaagcgggu.....   | 4    | 1 | s08 |
| .....cgggucgggaguuagcucaagcggG.....   | 4    | 1 | s08 |
| .....cgggucgggaguuagcucaagcGcCu.....  | 3    | 1 | s08 |
| .....cgggucgUaguuagcucaagcgggu.....   | 3    | 1 | s08 |
| .....cgggucgggaguuagcucaagcggcC.....  | 33   | 1 | s08 |
| .....cgggucgggaguuagcucaagcCgu.....   | 24   | 1 | s08 |
| .....cgggucgggaguuGgcucaagcgggu.....  | 4    | 1 | s08 |
| .....cAggucgggaguuagcucaagcgggu.....  | 3    | 1 | s08 |
| .....cgggucgggaguuagcucaCgcgggu.....  | 30   | 1 | s08 |
| .....cgggucgggAUuagcucaagcgggu.....   | 2    | 1 | s08 |
| .....cgggucgggaguuUgcucaagcgggu.....  | 1    | 1 | s08 |
| .....cgggucgggaguuagcuUaagcgggu.....  | 1    | 1 | s08 |
| .....cgggucgggaguuagcucGagcgggu.....  | 2    | 1 | s08 |
| .....cgggucgggUguuagcucaagcgggu.....  | 1    | 1 | s08 |
| .....cUggucgggaguuagcucaagcgggu.....  | 11   | 1 | s08 |
| .....cgggucgggACuuagcucaagcgggu.....  | 1    | 1 | s08 |
| .....cggCucgggaguuagcucaagcgggu.....  | 1    | 1 | s08 |
| .....cgggucgggGuaagcucaagcgggu.....   | 3    | 1 | s08 |
| .....Agggucgggaguuagcucaagcgggu.....  | 2    | 1 | s08 |
| .....cgggucgggaguuagcCaaagcgggu.....  | 2    | 1 | s08 |
| .....cgggucgggagUaagcucaagcgggu.....  | 1    | 1 | s08 |
| .....cgggucgCaguuagcucaagcgggu.....   | 1    | 1 | s08 |
| .....cgggucgggaguuagGuaagcgggu.....   | 1    | 1 | s08 |
| .....cgggucgggaguuagcucaGgcgggu.....  | 13   | 1 | s08 |
| .....cgCgucgggaguuagcucaagcgggu.....  | 3    | 1 | s08 |
| .....cgggucgggaguuagcucaUgcgggu.....  | 22   | 1 | s08 |
| .....cgggCcgaguuagcucaagcgggu.....    | 2    | 1 | s08 |
| .....cgggucgggaguuagcucaagcUgu.....   | 42   | 1 | s08 |
| .....cggguUggaguuagcucaagcgggu.....   | 9    | 1 | s08 |
| .....cgggucgggaguuagUucaagcgggu.....  | 13   | 1 | s08 |
| .....cgggucgggagUcagcucaagcgggu.....  | 4    | 1 | s08 |
| .....cgggucgggaguuagcucaagcgggu.....  | 8543 | 0 | s08 |
| .....cgggucgggaguuagcucaagcggA.....   | 166  | 1 | s08 |
| .....cgggucgggaguuAagcucaagcgggu..... | 1    | 1 | s08 |
| .....cgggGcgggaguuagcucaagcgggu.....  | 5    | 1 | s08 |
| .....cgggAcgggaguuagcucaagcgggu.....  | 1    | 1 | s08 |
| .....cggAucgggaguuagcucaagcgggu.....  | 1    | 1 | s08 |
| .....cgggucgggaguuACcucaagcgggu.....  | 3    | 1 | s08 |
| .....cgggucgggaguuagcucaaaAcgggu..... | 1    | 1 | s08 |
| .....cgggucgggaguuagcucaagcAgu.....   | 23   | 1 | s08 |
| .....cgggucgggaguuagcucaaCgggu.....   | 8    | 1 | s08 |
| .....cgggucgggaguuagcucUagcgggu.....  | 6    | 1 | s08 |
| .....cgAucgggaguuagcucaagcgggu.....   | 4    | 1 | s08 |
| .....cgggucgggaguuagcuUaagcgggu.....  | 6    | 1 | s08 |
| .....cgggucgggaguuAAcucaagcgggu.....  | 1    | 1 | s08 |
| .....cgggucgggaguuagcucaagcggguA..... | 604  | 1 | s08 |
| .....cgggucgggaguuagcucaagcggguG..... | 19   | 1 | s08 |
| .....cgggucgggaguuagcucaagcggguC..... | 4    | 1 | s08 |
| .....cgggucgggaguuagcucaagcggguA..... | 5    | 1 | s08 |
| .....Ugggucgggaguuagcucaagcgggu.....  | 3    | 1 | s08 |
| .....cgCgucgggaguuagcucaagcgggu.....  | 1    | 1 | s08 |
| .....cgggGcgggaguuagcucaagcgggu.....  | 1    | 1 | s08 |
| .....cgggucgggaguuagcucaagcgggu.....  | 2    | 1 | s08 |
| .....cgggucgggaguuagcucaagcCgu.....   | 1    | 1 | s08 |
| .....Ggggucgggaguuagcucaagcgggu.....  | 1    | 1 | s08 |
| .....cgggCcgaguuagcucaagcgggu.....    | 1    | 1 | s08 |
| .....cgggucgggaguuagcucaagcUgu.....   | 2    | 1 | s08 |
| .....cgggucgggaguuagcucaUgcgggu.....  | 1    | 1 | s08 |
| .....cgUgucgggaguuagcucaagcgggu.....  | 1    | 1 | s08 |
| .....cgggucgggaguuagcucaagcgggu.....  | 495  | 0 | s08 |
| .....cgggucgggaguuagcucaagcggcCu..... | 2    | 1 | s08 |
| .....cgggucgggaguuagcucaaUcgggu.....  | 1    | 1 | s08 |

cuaccgggucggaguuagcucaagcgguuuaccuccuacugcggacuucuaucuguccaucugugcgggguuucgagaccgcggggugcuuacugaccuuuuuag

|                                        |     |   |     |
|----------------------------------------|-----|---|-----|
| .....cgggucggaguuagcucaagcgguuCa.....  | 1   | 1 | s08 |
| .....cgggucggaguuagcucaagcgguuC.....   | 1   | 1 | s08 |
| .....cgggucggaguuagcucaagcUguua.....   | 1   | 1 | s08 |
| .....cgggucggaguuagcucaagcgguuA.....   | 27  | 0 | s08 |
| .....cgggucggaguuagcucaagcgguuU.....   | 74  | 1 | s08 |
| .....cgggucggaguuagcucaagcgguuAa.....  | 206 | 1 | s08 |
| .....cgggucggaguuagcucaagcgguuG.....   | 1   | 1 | s08 |
| .....cgggucggaguuagcucaagcgguuGa.....  | 6   | 1 | s08 |
| .....cgggucggaaUuagcucaagcgguuA.....   | 1   | 1 | s08 |
| .....cgggucggaguuagcucaagcgguuAac..... | 1   | 1 | s08 |
| .....cgggucggaguuagcucaagcgguuAU.....  | 1   | 1 | s08 |
| .....cgggucggaguuagcucaagcgguuAA.....  | 1   | 1 | s08 |
| .....gggucggaguuagcucaagc.....         | 4   | 0 | s08 |
| .....gggucggaguuagcucaagcgc.....       | 2   | 0 | s08 |
| .....gggucggaguuagcucaagcgcgg.....     | 57  | 0 | s08 |
| .....gggGcggaguuagcucaagcgcgg.....     | 1   | 1 | s08 |
| .....Cggucggaguuagcucaagcgcgg.....     | 3   | 1 | s08 |
| .....gggucggaguuagcucaaCcg.....        | 1   | 1 | s08 |
| .....gggucggaguuagcucaaCcggu.....      | 1   | 1 | s08 |
| .....Uggucggaguuagcucaagcgcgg.....     | 1   | 1 | s08 |
| .....gUgucggaguuagcucaagcgcgg.....     | 1   | 1 | s08 |
| .....Cggucggaguuagcucaagcgcgg.....     | 4   | 1 | s08 |
| .....gggucggaguuagcucaagcUgu.....      | 1   | 1 | s08 |
| .....gggucggaguuagcucaagcGlu.....      | 1   | 1 | s08 |
| .....gggucggaguuagcucaagcgcgg.....     | 226 | 0 | s08 |
| .....gggucggaguuagcucaagUggu.....      | 1   | 1 | s08 |
| .....gggucggaguuagcucaagcGU.....       | 1   | 1 | s08 |
| .....gggucggaguuagcucaaUcggu.....      | 1   | 1 | s08 |
| .....gggucggaguuagcucCagcgg.....       | 1   | 1 | s08 |
| .....gggucggaguuagcucUagcgg.....       | 1   | 1 | s08 |
| .....gggucggaguuagcucaaAcggu.....      | 1   | 1 | s08 |
| .....gggucggaguuagcucaagcggC.....      | 3   | 1 | s08 |
| .....gggucggaguuagcucaagcggA.....      | 6   | 1 | s08 |
| .....gggucggaguuagcucaagcggCu.....     | 1   | 1 | s08 |
| .....gggucggaguuagcucaagcggUA.....     | 46  | 1 | s08 |
| .....gggCcgaguuagcucaagcgguu.....      | 1   | 1 | s08 |
| .....gAgucggaguuagcucaagcgguu.....     | 1   | 1 | s08 |
| .....gggucggaguuagcucaagcGluu.....     | 1   | 1 | s08 |
| .....gggucggaguuagcucaagcgguu.....     | 80  | 0 | s08 |
| .....CggucggaguuagcucaagcgguuA.....    | 1   | 1 | s08 |
| .....gggucggaguuagcucaagcgguuA.....    | 11  | 0 | s08 |
| .....gggucggaguuagcucaagcgguuU.....    | 18  | 1 | s08 |
| .....gggucggaguuagcucaagcGUua.....     | 1   | 1 | s08 |
| .....gggucggaguuagcucaagcgguuAa.....   | 4   | 1 | s08 |
| .....gggucggaguuagcucaagcgguuac.....   | 1   | 0 | s08 |
| .....Cgucggaguuagcucaagcgguu.....      | 2   | 1 | s08 |
| .....ggucggaguuagcucaagcgguu.....      | 1   | 0 | s08 |
| .....ggucggaguuagcucaagcgguuA.....     | 1   | 1 | s08 |
| .....ggaguuagcucaagcgguu.....          | 1   | 0 | s08 |
| .....uaccuccuacugcggacu.....           | 1   | 0 | s08 |
| .....uaccuccuacugcggacuuuu.....        | 2   | 0 | s08 |
| .....uaccuccuacugcggacuuuuc.....       | 2   | 0 | s08 |
| .....uaccuccuacugcggacuuuuc.....       | 5   | 0 | s08 |
| .....cuacugcggacuuuucuu.....           | 1   | 0 | s08 |
| .....cucugugcgggguuucga.....           | 1   | 0 | s08 |
| .....accgcgggucuuacugaccuuu.....       | 1   | 0 | s08 |
| .....cgcgggugcuuacugaccuu.....         | 2   | 0 | s08 |
| .....cgcgggugcuuacugCccuu.....         | 1   | 1 | s08 |
| .....cgcgggugcuuUugaccuu.....          | 1   | 1 | s08 |
| .....cgcgggugcuuacugaccuu.....         | 83  | 0 | s08 |
| .....cgcgggugcuuacugaccuuA.....        | 2   | 1 | s08 |
| .....cgcggguuUcuuacugaccuu.....        | 1   | 1 | s08 |
| .....cgcgggugcuuacuCaaccuu.....        | 1   | 1 | s08 |
| .....cgcgggugcuuacugaccuuu.....        | 72  | 0 | s08 |
| .....cgcgggugcuuacugaccuuLu.....       | 3   | 1 | s08 |
| .....cgcgggugcuuacugaUccuu.....        | 1   | 1 | s08 |
| .....cgcgggugcuuacugaccuuA.....        | 8   | 1 | s08 |
| .....cgcgggugcuuacugaccuuC.....        | 4   | 1 | s08 |
| .....cgcgggugcuuacugaccuuuA.....       | 1   | 1 | s08 |

cuaccgggucggaguuagcucaagcgguuaccuccuacugcgggacuuucuaucuguccaucucugugcgggguuucgagaccgcggggucuuacugaccuuuuuag

|                                   |      |   |     |
|-----------------------------------|------|---|-----|
| .....cgcgggugcuuacugaccuuuu..     | 2    | 0 | s08 |
| .....cgcgggugcuuacugaccuuuuU..    | 1    | 1 | s08 |
| .....gcgggugcuuacugaccuu.....     | 1    | 0 | s08 |
| .....Ccgggugcuuacugaccuu.....     | 1    | 1 | s08 |
| ..accgggucggaguuagcucaagc.....    | 1    | 0 | DLD |
| ..Accgggucggaguuagcucaagc.....    | 1    | 1 | DLD |
| ..ccgggucggaguuagcucaagc.....     | 1    | 0 | DLD |
| ..cccgAgucggaguuagcucaagcgg.....  | 1    | 1 | DLD |
| ..ccgggucggaguuagcucaagcgg.....   | 2    | 0 | DLD |
| ..ccgggucggaguuagcucaagcggU.....  | 2    | 1 | DLD |
| ..Accgggucggaguuagcucaagcgg.....  | 2    | 1 | DLD |
| ..ccgggucggaguuagcucaagcggU.....  | 4    | 0 | DLD |
| ..ccgggucggaguuagcuc.....         | 2    | 0 | DLD |
| ..ccgggucggaguuagcucaagc.....     | 2    | 0 | DLD |
| ..ccgggucggaguuagcucaagA.....     | 2    | 1 | DLD |
| ..ccgggucggaguuagcucaagc.....     | 9    | 0 | DLD |
| ..ccgggucggaguuGgcucaagc.....     | 1    | 1 | DLD |
| ..ccgggucggaguuagcucaagcG.....    | 3    | 1 | DLD |
| ..ccgggucggaguuagcucaagcgg.....   | 32   | 0 | DLD |
| ..ccgggucggaguuagcucaagcggU.....  | 3    | 1 | DLD |
| ..ccgggucggaguuagcucaagcggU.....  | 16   | 0 | DLD |
| ..ccgggucggaguuagcucaagcgguu..... | 5    | 0 | DLD |
| ..ccgggucggaguuagcucaagcggU.....  | 1    | 1 | DLD |
| ..ccgggucggaguuagcucaa.....       | 4    | 0 | DLD |
| ..ccgggucggCguuagcucaag.....      | 1    | 1 | DLD |
| ..ccgggucggaguuagcucCag.....      | 2    | 1 | DLD |
| ..ccgggucggaguuagcucaag.....      | 34   | 0 | DLD |
| ..ccgggucggaguuagcucaCg.....      | 1    | 1 | DLD |
| ..ccgggucggaguuagcucaagA.....     | 1    | 1 | DLD |
| ..ccgggucggaguuagcucaaUc.....     | 1    | 1 | DLD |
| ..ccgggucggaguuagcucaCgc.....     | 2    | 1 | DLD |
| ..ccgggucggaguuagcucaagc.....     | 49   | 0 | DLD |
| ..ccgggucggCguuagcucaagc.....     | 2    | 1 | DLD |
| ..ccgggucggaguuagcucaCgc.....     | 1    | 1 | DLD |
| ..ccgggucggaguuagcucaagc.....     | 94   | 0 | DLD |
| ..ccgggucggaguuagcucaagAg.....    | 2    | 1 | DLD |
| ..ccgggucggaguuagcucaagcA.....    | 2    | 1 | DLD |
| ..ccgggucggaguuagcucaCgcgg.....   | 5    | 1 | DLD |
| ..ccgggAcggaguuagcucaagcgg.....   | 1    | 1 | DLD |
| ..ccgggucggCguuagcucaagcgg.....   | 2    | 1 | DLD |
| ..ccgggucggaguuagcucCagcgg.....   | 4    | 1 | DLD |
| ..ccgggucggaguuagcucaaUcgg.....   | 2    | 1 | DLD |
| ..ccgggucggaguuagcucaagcAg.....   | 1    | 1 | DLD |
| ..ccgggucggAuuagcucaagcgg.....    | 1    | 1 | DLD |
| ..ccgggucggaguuagcucaagcG.....    | 6    | 1 | DLD |
| ..ccgggucggaguuagcucaagcUg.....   | 2    | 1 | DLD |
| ..ccgggucggagGuaagcucaagcgg.....  | 1    | 1 | DLD |
| ..ccgggucggaguuagcucaagAgg.....   | 1    | 1 | DLD |
| ..ccgggucggaguuagcucaagcggU.....  | 8    | 1 | DLD |
| ..ccgggucggaguuagcucGagcgg.....   | 1    | 1 | DLD |
| ..ccgggucggaguuagcucaagcgg.....   | 506  | 0 | DLD |
| ..cCgggucggaguuagcucaagcgg.....   | 2    | 1 | DLD |
| ..ccgggucggGguuagcucaagcgg.....   | 1    | 1 | DLD |
| ..ccgggucggaguuagcucaaCcggu.....  | 1    | 1 | DLD |
| ..ccgggucggaguuagcucaagcggU.....  | 10   | 1 | DLD |
| ..cUgggucggaguuagcucaagcggU.....  | 2    | 1 | DLD |
| ..ccgggucggaguuagcucaagcggU.....  | 1342 | 0 | DLD |
| ..ccgggucgCaguuagcucaagcggU.....  | 4    | 1 | DLD |
| ..cgAgucggaguuagcucaagcggU.....   | 3    | 1 | DLD |
| ..ccgggucggaguuagcucaagcggU.....  | 4    | 1 | DLD |
| ..ccgggucggaguuagcucaagAggu.....  | 2    | 1 | DLD |
| ..ccgggucggaguuUcuaagcggU.....    | 2    | 1 | DLD |
| ..ccgggucggaguuagcucaagcggA.....  | 13   | 1 | DLD |
| ..ccgggAcggaguuagcucaagcggU.....  | 1    | 1 | DLD |
| ..AggggucggaguuagcucaagcggU.....  | 1    | 1 | DLD |
| ..ccgggucggaguuagcucaagcggA.....  | 1    | 1 | DLD |

cuaccgggucgggaguuagcucaagcgguuaccuccuacugcgggacuuucuaucuguccaucucugucgggguuucgagaccgcgggugcuuacugaccuuuuuug

|                                        |     |   |     |
|----------------------------------------|-----|---|-----|
| .....Ggggucgggaguuagcucaagcggg.....    | 1   | 1 | DLD |
| .....Ugggucgggaguuagcucaagcggg.....    | 1   | 1 | DLD |
| .....cgggucGggaguuagcucaagcggg.....    | 1   | 1 | DLD |
| .....cgggucAggaguuagcucaagcggg.....    | 3   | 1 | DLD |
| .....cgggucgAggaguuagcucaagcggg.....   | 1   | 1 | DLD |
| .....cgggucUggaguuagcucaagcggg.....    | 1   | 1 | DLD |
| .....cgggucggGuuuagcucaagcggg.....     | 1   | 1 | DLD |
| .....cgggucgggaguuagcuCagcggg.....     | 11  | 1 | DLD |
| .....cgggucgggaguuagUucaagcggg.....    | 1   | 1 | DLD |
| .....cgggucgggaguuagcuUaagcggg.....    | 1   | 1 | DLD |
| .....cgggucgggaguuagcucaagcggg.....    | 2   | 1 | DLD |
| .....cgggucgggaguuagcucaagcggg.....    | 6   | 1 | DLD |
| .....cgggucgggaguuagcuUaagcggg.....    | 1   | 1 | DLD |
| .....cgggucgggaguuagcuUaagcggg.....    | 2   | 1 | DLD |
| .....cgggucgggaguuagcucaagcggg.....    | 4   | 1 | DLD |
| .....cgggucgggaguuagcucaagcggg.....    | 1   | 1 | DLD |
| .....cgggucgggaguuagcucaagcggg.....    | 2   | 1 | DLD |
| .....cggAucgggaguuagcucaagcggg.....    | 3   | 1 | DLD |
| .....cgCgucgggaguuagcucaagcggg.....    | 1   | 1 | DLD |
| .....cgggucgggaguuagcucaagcgggG.....   | 1   | 1 | DLD |
| .....cgggucgggaguuagcucaagUggg.....    | 2   | 1 | DLD |
| .....cgggucgggaguuagcucaagGggg.....    | 1   | 1 | DLD |
| .....cgggucgggCguuagcucaagcggg.....    | 15  | 1 | DLD |
| .....cggUucgggaguuagcucaagcggg.....    | 3   | 1 | DLD |
| .....cgggucgggaguuagcucaCgcggu.....    | 10  | 1 | DLD |
| .....cgggucgggaguuagcucaaUcggu.....    | 7   | 1 | DLD |
| .....cgUgucgggaguuagcucaagcggg.....    | 1   | 1 | DLD |
| .....cgggucgggaguuagcucaagcgggC.....   | 2   | 1 | DLD |
| .....cgggucgggCguuagcucaagcgggu.....   | 4   | 1 | DLD |
| .....cgggucgggUguuagcucaagcgggu.....   | 2   | 1 | DLD |
| .....cgggucgggaguuagcucaagcgggA.....   | 40  | 1 | DLD |
| .....cgggucgggaguuagcuCagcgggu.....    | 4   | 1 | DLD |
| .....cgggucgggGguuagcucaagcgggu.....   | 1   | 1 | DLD |
| .....cgggucgggaguuagcucaagcgggu.....   | 203 | 0 | DLD |
| .....cgggucCgaguuagcucaagcgggu.....    | 1   | 1 | DLD |
| .....cgggucgggaguuagcucaagcgggG.....   | 2   | 1 | DLD |
| .....cgggucgggaguuagcucaCgcggu.....    | 2   | 1 | DLD |
| .....cgggucgggaguuagcucaGgcgggu.....   | 1   | 1 | DLD |
| .....cggguAaggaguuagcucaagcgggu.....   | 1   | 1 | DLD |
| .....cgggucgggaguuagcucaaUcggu.....    | 1   | 1 | DLD |
| .....cgggucgggaguuagcucaagcgggAa.....  | 15  | 1 | DLD |
| .....cgggucgggaguuagcucaagcgggGa.....  | 3   | 1 | DLD |
| .....cgggucgggaguuagcucaagcggguC.....  | 1   | 1 | DLD |
| .....cgggucgggaguuagcucaagcggguA.....  | 5   | 0 | DLD |
| .....cgggucgggaguuagcucaagcggguU.....  | 39  | 1 | DLD |
| .....cgggucgggaguuagcucaagcggguA.....  | 9   | 1 | DLD |
| .....gggucgggaguuagcucaagc.....        | 3   | 0 | DLD |
| .....gggucgggaguuagcucaagcgg.....      | 29  | 0 | DLD |
| .....gggucgggaguuagcucaagcA.....       | 2   | 1 | DLD |
| .....gggucgggaguuagcucaCgcg.....       | 1   | 1 | DLD |
| .....gggucgggaguuagcuUaagcgg.....      | 1   | 1 | DLD |
| .....gggucgggaguuagcucaaUcg.....       | 1   | 1 | DLD |
| .....gggucAggaguuagcucaagcgg.....      | 1   | 1 | DLD |
| .....gggucgggaguuagcucaagcgg.....      | 1   | 1 | DLD |
| .....Cggucgggaguuagcucaagcggg.....     | 3   | 1 | DLD |
| .....gggucgggaguuagcuGaaagcgg.....     | 1   | 1 | DLD |
| .....gggucgggaguuagcucaagcggg.....     | 77  | 0 | DLD |
| .....gggucgggaguuagcucaCgcg.....       | 1   | 1 | DLD |
| .....ggAucgggaguuagcucaagcggg.....     | 1   | 1 | DLD |
| .....gggucgggaguuagcucaGgcgg.....      | 1   | 1 | DLD |
| .....gggucgggaguuagcucaagcgggA.....    | 3   | 1 | DLD |
| .....gggucgggaguuagcuUaagcgg.....      | 1   | 1 | DLD |
| .....gggucgggaguuagcucaagcggg.....     | 20  | 0 | DLD |
| .....gggucgggaguuagcucaagcgggU.....    | 5   | 1 | DLD |
| .....gggucgggaguuagcucaagcggguac.....  | 1   | 0 | DLD |
| .....gggucgggaguuagcucaagcggguA.....   | 1   | 1 | DLD |
| .....gggucgggaguuagcucaagcggguacc..... | 2   | 0 | DLD |
| .....gggucgggaguuagcucaagcggguacc..... | 1   | 1 | DLD |
| .....gggucgggaguuagcucaagcggguacc..... | 1   | 0 | DLD |

cuaccgggucggaguagcucaagcgguuuaccuccuacugccggacuucuaucuguccaucucugucgggguuucgagacccgcgggugcuuacugaccuuuuuag

|                                         |     |   |     |
|-----------------------------------------|-----|---|-----|
| .....gggucggaguagcucaCgcgguuaccucc..... | 1   | 1 | DL  |
| .....ggucggaguagcucaag.....             | 1   | 0 | DL  |
| .....ggucggaguagcucaagc.....            | 2   | 0 | DL  |
| .....ggucggaguagcucaagcgggu.....        | 1   | 0 | DL  |
| .....ggucggaguagcucaagcgggu.....        | 1   | 0 | DL  |
| .....ucggaguagcucaagcgggu.....          | 3   | 0 | DL  |
| .....ucggaguagcucaagcggguU.....         | 1   | 1 | DL  |
| .....cggaguagcucaagcggg.....            | 1   | 0 | DL  |
| .....uuaccuccuacugccggac.....           | 1   | 0 | DL  |
| .....uaccuccuacugccggacuuu.....         | 1   | 0 | DL  |
| .....uaccuccuacugccggacuuuu.....        | 4   | 0 | DL  |
| .....ccuacugccggacuuuu.....             | 1   | 0 | DL  |
| .....ucuauucuguccaucucugucgggguu.....   | 1   | 0 | DL  |
| .....ucugucugggguucgagacc.....          | 1   | 0 | DL  |
| .....Ugguucgagacccgcggu.....            | 2   | 1 | DL  |
| .....guucgagacccgcgguuacugaccuuuu.....  | 1   | 0 | DL  |
| .....uucgagacccgcgguu.....              | 1   | 0 | DL  |
| .....gagacccgcgguuacugaccuuuu.....      | 2   | 0 | DL  |
| .....gaccAcggugcuuacugaccuuuu.....      | 1   | 1 | DL  |
| .....acccgggugcuuacugaccuuu.....        | 3   | 0 | DL  |
| .....cccgggugcuuacugaccuuu.....         | 1   | 0 | DL  |
| .....cgAgggugcuuacugacc.....            | 1   | 1 | DL  |
| .....cgcgggugcuuacugacc.....            | 10  | 0 | DL  |
| .....cgcgggugcuuacugacc.....            | 12  | 0 | DL  |
| .....cgcgAgugcuuacugacc.....            | 1   | 1 | DL  |
| .....cgcgggugAuacugaccu.....            | 1   | 1 | DL  |
| .....cgcgggugcuuacugaccu.....           | 12  | 0 | DL  |
| .....Agcgggugcuuacugaccuu.....          | 1   | 1 | DL  |
| .....cgcgggugcuuacugaccuA.....          | 2   | 1 | DL  |
| .....cgcgggugcuuacugaccuu.....          | 60  | 0 | DL  |
| .....cgcgggugcuuacugaccAu.....          | 1   | 1 | DL  |
| .....cgcgggugcuuacugaccuC.....          | 3   | 1 | DL  |
| .....cAcggugcuuacugaccuuu.....          | 4   | 1 | DL  |
| .....cgcgggugcuuacugacUcuu.....         | 2   | 1 | DL  |
| .....cgcgggugcuuacuAaccuuu.....         | 1   | 1 | DL  |
| .....cgcgggugcuuacugacccuu.....         | 2   | 1 | DL  |
| .....cgcgggugcuuacugaccuuu.....         | 653 | 0 | DL  |
| .....cgcgggugcuuacugaccAu.....          | 1   | 1 | DL  |
| .....cgcgggugcuuacugaccuGu.....         | 1   | 1 | DL  |
| .....cgcgggugcuuacugaccuAuuu.....       | 1   | 1 | DL  |
| .....cgcgggugcuuacugaccUuuu.....        | 2   | 1 | DL  |
| .....cgcgggugcuuacugaccuuu.....         | 1   | 1 | DL  |
| .....cgUggugcuuacugaccuuu.....          | 1   | 1 | DL  |
| .....cgcgAgugcuuacugaccuuu.....         | 1   | 1 | DL  |
| .....cgcgggugcuuacugaccuuC.....         | 4   | 1 | DL  |
| .....cgcgggugcuuacugaccuuu.....         | 2   | 1 | DL  |
| .....cgcgggugcuuacugaccuuA.....         | 17  | 1 | DL  |
| .....cgcgggugcuuacCgaccuuu.....         | 1   | 1 | DL  |
| .....cgcgggugcuCacugaccuuu.....         | 2   | 1 | DL  |
| .....cgcgggugcuuacugaccuCu.....         | 2   | 1 | DL  |
| .....cgcgggugcuuacugaccuAu.....         | 16  | 1 | DL  |
| .....cgcgggugAuacugaccuuu.....          | 1   | 1 | DL  |
| .....cgcgggugcuuAuacugaccuuu.....       | 1   | 1 | DL  |
| .....cgcgggugcuuacuUaccuuu.....         | 2   | 1 | DL  |
| .....cgcgCugcuuacugaccuuu.....          | 3   | 1 | DL  |
| .....cgcgggugcuuacugaccuuuA.....        | 6   | 1 | DL  |
| .....cgcgggugcuuacugaccuAu.....         | 2   | 1 | DL  |
| .....cgcgggugcuuacugaccuuuG.....        | 3   | 1 | DL  |
| .....cgcgggugcuuacugaccuuu.....         | 26  | 0 | DL  |
| .....cgcgggugcuuacugaccuCu.....         | 1   | 1 | DL  |
| .....cgcgggugcuuacugaccuCu.....         | 1   | 1 | DL  |
| .....cgcgggugcuuacugaccuuuuau.....      | 1   | 0 | DL  |
| .....gcgggugcuuacugaccuuu.....          | 2   | 0 | DL  |
| .....gcgggugcuuacugaccuuuUu.....        | 1   | 1 | DL  |
| .....ggugcuuacugaccuuu.....             | 4   | 0 | DL  |
| .....cgggucggaguagcucaagcgg.....        | 1   | 0 | k03 |
| .....cgggucggaguagcucaagcgg.....        | 2   | 0 | k03 |

cuaccgggucggaguuagcucaagcgguuaccuccuacugcggacuuucuaucuguccaucucugucgggguuucgagaccgcggggugcuuacugaccuuuuuag

|                                        |     |   |     |
|----------------------------------------|-----|---|-----|
| .....cggCucggaguuagcucaagcggg.....     | 1   | 1 | k03 |
| .....cgggucggaguuagcucaagcggg.....     | 3   | 0 | k03 |
| .....cgggucggaguuagcucaaaUcggg.....    | 1   | 1 | k03 |
| .....cgggucggaguuagcucaagcggg.....     | 1   | 0 | k03 |
| .....cgggucggaguuagcucaagcggguU.....   | 2   | 1 | k03 |
| .....gggucggaguuagcucaagcggg.....      | 1   | 0 | k03 |
| .....gggGcggaguuagcucaagcggg.....      | 1   | 1 | k03 |
| .....gggucggaguuagcucaagcgggu.....     | 3   | 0 | k03 |
| .....cgcgggugcuuacugaccuu.....         | 3   | 0 | k03 |
| .....cgcgggugcuuacugacUcuu.....        | 1   | 1 | k03 |
| .....cgcgggugcuuacugaccuu.....         | 2   | 0 | k03 |
| .....accgggucggaguuagUucaagcgg.....    | 1   | 1 | ya2 |
| .....accgggucggaguuagcucaagcgg.....    | 3   | 0 | ya2 |
| .....accgggucggaguuagcucaagcggg.....   | 6   | 0 | ya2 |
| .....accgggucggaguuagcucaagcgggu.....  | 5   | 0 | ya2 |
| .....accgggucggaguuagcucaagcggguU..... | 1   | 1 | ya2 |
| .....Accgggucggaguuagcucaag.....       | 2   | 1 | ya2 |
| .....ccgggucggaguuagcucaagcgg.....     | 1   | 0 | ya2 |
| .....Accgggucggaguuagcucaagcggg.....   | 3   | 1 | ya2 |
| .....Accgggucggaguuagcucaagcggg.....   | 1   | 1 | ya2 |
| .....ccgggucggaguuagcucaagcgggu.....   | 1   | 0 | ya2 |
| .....ccgggucggaguuagcucaag.....        | 1   | 0 | ya2 |
| .....ccgggucggaguuagcucaagc.....       | 3   | 0 | ya2 |
| .....Ucgggucggaguuagcucaagcgg.....     | 1   | 1 | ya2 |
| .....ccgggucggaguuagcucaagcgg.....     | 10  | 0 | ya2 |
| .....ccgggucggaguuagcucaagcggg.....    | 5   | 0 | ya2 |
| .....ccgggucggaguuagcCcaagcgg.....     | 1   | 1 | ya2 |
| .....ccgggucggaguuagcucaagcggA.....    | 1   | 1 | ya2 |
| .....ccgggGcggaguuagcucaagcgggu.....   | 1   | 1 | ya2 |
| .....ccgggucggaguuagcucaagcgggu.....   | 5   | 0 | ya2 |
| .....cgggucggaguuagcucaag.....         | 9   | 0 | ya2 |
| .....cgggucggaguuagcucaagc.....        | 23  | 0 | ya2 |
| .....cgggucggagUuagcucaagc.....        | 1   | 1 | ya2 |
| .....cgggAcggaguuagcucaagc.....        | 1   | 1 | ya2 |
| .....cgggucggaguuagcucaagA.....        | 1   | 1 | ya2 |
| .....cgggucggaguuagcucaagc.....        | 16  | 0 | ya2 |
| .....cgggucAgaguuagcucaagcgg.....      | 1   | 1 | ya2 |
| .....Ugggucggaguuagcucaagcgg.....      | 1   | 1 | ya2 |
| .....cgggucggagCuagcucaagcgg.....      | 1   | 1 | ya2 |
| .....cgggucggaguuagGuaagcgg.....       | 1   | 1 | ya2 |
| .....cgggucggaguuagcucaUgcgg.....      | 1   | 1 | ya2 |
| .....cggguUggaguuagcucaagcgg.....      | 1   | 1 | ya2 |
| .....cgggucgUaguuagcucaagcgg.....      | 4   | 1 | ya2 |
| .....cgggucggaguuagcucaagcgg.....      | 560 | 0 | ya2 |
| .....cggUucggaguuagcucaagcgg.....      | 2   | 1 | ya2 |
| .....cgggucggaguuagUucaagcgg.....      | 1   | 1 | ya2 |
| .....cCgggucggaguuagcucaagcgg.....     | 1   | 1 | ya2 |
| .....cgggucggaguuagcucaagcgA.....      | 3   | 1 | ya2 |
| .....cgggucggaguuagcucaGgcgg.....      | 1   | 1 | ya2 |
| .....cgggGcggaguuagcucaagcgg.....      | 3   | 1 | ya2 |
| .....cgggucggaguuagcucaagcUg.....      | 1   | 1 | ya2 |
| .....Agggucggaguuagcucaagcgg.....      | 1   | 1 | ya2 |
| .....cgggucggagGuaagcucaagcgg.....     | 2   | 1 | ya2 |
| .....cgggucggaguuagcucaaUcgg.....      | 2   | 1 | ya2 |
| .....cgggucggaguuagcuAaagcgg.....      | 2   | 1 | ya2 |
| .....cgAgucggaguuagcucaagcgg.....      | 1   | 1 | ya2 |
| .....cgggucggaguuUcucaagcgg.....       | 1   | 1 | ya2 |
| .....cgggucggaguuagcucaagAgg.....      | 2   | 1 | ya2 |
| .....cggguUggaguuagcucaagcgg.....      | 1   | 1 | ya2 |
| .....cgggGcggaguuagcucaagcgg.....      | 5   | 1 | ya2 |
| .....cgggucggaguuagcucaagcGpu.....     | 2   | 1 | ya2 |
| .....cgggucggaguuUcucaagcgg.....       | 1   | 1 | ya2 |
| .....cgggCcgaguuagcucaagcgg.....       | 2   | 1 | ya2 |
| .....Ugggucggaguuagcucaagcgg.....      | 1   | 1 | ya2 |
| .....cgggucggaguuagcucaagcgg.....      | 534 | 0 | ya2 |
| .....cgggucggaguuagcucGagcgg.....      | 1   | 1 | ya2 |
| .....cggAucggaguuagcucaagcgg.....      | 1   | 1 | ya2 |
| .....cgggucggaguuagcucaagcggA.....     | 17  | 1 | ya2 |

cuaccgggucgggaguuagcucaagcgguuaccuccucaugcgggacuuucuaucuguccaucucugugcgggguuucgagaccgcgggugcuuacugaccuuuuuag

|                                       |     |   |     |
|---------------------------------------|-----|---|-----|
| .....cgggucUgaguuagcucaagcggg.....    | 1   | 1 | ya2 |
| .....cgggucgggaguuagcucaagUggg.....   | 2   | 1 | ya2 |
| ....Agggucgggaguuagcucaagcggg.....    | 1   | 1 | ya2 |
| .....cgggucgggaguuagcuAaagcggg.....   | 1   | 1 | ya2 |
| .....cgggucgCaguuagcucaagcggg.....    | 1   | 1 | ya2 |
| .....cgggucgggaguuagcuUaagcggg.....   | 1   | 1 | ya2 |
| .....cgggucgggaguuagcucaagcggC.....   | 4   | 1 | ya2 |
| .....cAggucgggaguuagcucaagcggg.....   | 1   | 1 | ya2 |
| .....cggguAaggaguuagcucaagcggg.....   | 2   | 1 | ya2 |
| .....cggUucgggaguuagcucaagcggg.....   | 2   | 1 | ya2 |
| .....Ggggucgggaguuagcucaagcggg.....   | 2   | 1 | ya2 |
| ....cgggucgggaguuagcucaagcggG.....    | 1   | 1 | ya2 |
| .....cgggAcgggaguuagcucaagcggg.....   | 1   | 1 | ya2 |
| .....cUggucgggaguuagcucaagcggg.....   | 1   | 1 | ya2 |
| .....cgUgucgggaguuagcucaagcggg.....   | 2   | 1 | ya2 |
| .....cgggucgggaguuagcAcaagcggg.....   | 1   | 1 | ya2 |
| .....cgggucgggaguuagcucaaCcggu.....   | 1   | 1 | ya2 |
| .....cgggucgggaguuagcucaaUcggu.....   | 1   | 1 | ya2 |
| ....cgggucgggaguuagcucaagcgggu.....   | 1   | 1 | ya2 |
| .....cgggucgggaguuagcucaagcggUuu..... | 1   | 1 | ya2 |
| .....cgggucgggaguuagcucaagcggUuu..... | 1   | 1 | ya2 |
| .....cgggucgggaguuagcucaagcgggu.....  | 138 | 0 | ya2 |
| .....Ggggucgggaguuagcucaagcgggu.....  | 6   | 1 | ya2 |
| .....cgggucgggaguuagcCcaagcgggu.....  | 1   | 1 | ya2 |
| .....cgggucgggaguuagcucaagcggGu.....  | 1   | 1 | ya2 |
| .....cggUucgggaguuagcucaagcgggu.....  | 1   | 1 | ya2 |
| ....cgggucgggaguuagcucaagcggCu.....   | 1   | 1 | ya2 |
| .....cgggucgggaguuagcucaagcgggA.....  | 8   | 1 | ya2 |
| .....cgggucUgaguuagcucaagcgggu.....   | 1   | 1 | ya2 |
| .....cgggucgggaguuagGuaagcgggu.....   | 1   | 1 | ya2 |
| .....cgggucgggaguuagcucaagcgggA.....  | 1   | 1 | ya2 |
| .....cgggucgggaguuagcucaagcgggAa..... | 1   | 1 | ya2 |
| .....cgggucgggaguuagcucaagcggguU..... | 10  | 1 | ya2 |
| ....cgggucgggaguuagcucaagcggguuU..... | 1   | 1 | ya2 |
| .....gggucgggaguuagcucaag.....        | 1   | 0 | ya2 |
| .....gggGcgggaguuagcucaagc.....       | 1   | 1 | ya2 |
| .....gggucgggaguuagcucaagc.....       | 18  | 0 | ya2 |
| .....gggucgggaguuagcucaagcg.....      | 6   | 0 | ya2 |
| .....gggucggGuuagcucaagcgg.....       | 1   | 1 | ya2 |
| .....gggucgggaguuagcucaagcgg.....     | 128 | 0 | ya2 |
| .....Uggucgggaguuagcucaagcgg.....     | 1   | 1 | ya2 |
| .....Cggucgggaguuagcucaagcgg.....     | 2   | 1 | ya2 |
| .....gggucgggaguuagcucUagcggg.....    | 1   | 1 | ya2 |
| .....gggucgggaguuagUucaagcggg.....    | 1   | 1 | ya2 |
| .....gggucgggaguuagcucaagcggA.....    | 2   | 1 | ya2 |
| .....gggucgggaguuagcucCagcggg.....    | 1   | 1 | ya2 |
| .....gggGcgggaguuagcucaagcggg.....    | 3   | 1 | ya2 |
| .....gggucgggagAuaagcucaagcggg.....   | 2   | 1 | ya2 |
| .....gggucgggaguuagcucaagcggG.....    | 1   | 1 | ya2 |
| .....gggucgggaguuagcucaagcggUu.....   | 4   | 1 | ya2 |
| .....gUgucgggaguuagcucaagcggg.....    | 1   | 1 | ya2 |
| .....gggucgggaguuagcucaagcggg.....    | 303 | 0 | ya2 |
| .....Cggucgggaguuagcucaagcggg.....    | 2   | 1 | ya2 |
| .....gggucgggaguuagcucaaCcggu.....    | 2   | 1 | ya2 |
| .....ggAucgggaguuagcucaagcggg.....    | 1   | 1 | ya2 |
| .....ggguUgggaguuagcucaagcggg.....    | 2   | 1 | ya2 |
| .....gggucgggaguuagcucaaUcggu.....    | 3   | 1 | ya2 |
| .....gggucgggaguuUcuaagcggg.....      | 2   | 1 | ya2 |
| .....gggucgggaguuagcGcaagcggg.....    | 1   | 1 | ya2 |
| .....gUgucgggaguuagcucaagcgggu.....   | 4   | 1 | ya2 |
| .....gggGcgggaguuagcucaagcgggu.....   | 10  | 1 | ya2 |
| .....ggguAgggaguuagcucaagcgggu.....   | 1   | 1 | ya2 |
| .....gCgucgggaguuagcucaagcgggu.....   | 2   | 1 | ya2 |
| .....gggucgggaguuagcucaagcgggA.....   | 1   | 1 | ya2 |
| .....gggucgggUuuagcucaagcgggu.....    | 2   | 1 | ya2 |
| .....gggucgggaguuagcucUagcgggu.....   | 1   | 1 | ya2 |
| .....gggucgggaguuagUucaagcgggu.....   | 2   | 1 | ya2 |
| .....gggucgggaguuagcucaagcgggu.....   | 1   | 1 | ya2 |
| .....ggCucgggaguuagcucaagcgggu.....   | 1   | 1 | ya2 |
| .....gggucgggaguuagcucaagcggUuu.....  | 3   | 1 | ya2 |

cuaccgggucggaguuagcucaagcgguuaccuccuacugcggacuuucuaucuguccaucucugucgggguuucgagaccgcggggucuuacugaccuuuuuug

|                                       |      |   |     |
|---------------------------------------|------|---|-----|
| .....gggucggaguuGgcucaagcgguu.....    | 2    | 1 | ya2 |
| .....gggucggaguuagcGcaagcgguu.....    | 1    | 1 | ya2 |
| .....gggucggaguuagcCcaagcgguu.....    | 1    | 1 | ya2 |
| .....gggucggaguuagcucaagcggCu.....    | 8    | 1 | ya2 |
| .....Uggucggaguuagcucaagcgguu.....    | 2    | 1 | ya2 |
| .....gggucggaguuagcucaaaAcgguu.....   | 2    | 1 | ya2 |
| .....gggucggGguuagcucaagcgguu.....    | 1    | 1 | ya2 |
| .....Aggucggaguuagcucaagcgguu.....    | 1    | 1 | ya2 |
| .....ggλucggaguuagcucaagcgguu.....    | 1    | 1 | ya2 |
| .....ggUucggaguuagcucaagcgguu.....    | 3    | 1 | ya2 |
| .....ggguUggaguuagcucaagcgguu.....    | 1    | 1 | ya2 |
| .....gggCcgaguuagcucaagcgguu.....     | 1    | 1 | ya2 |
| .....gggucggaguuagcucaagGgguu.....    | 1    | 1 | ya2 |
| .....gggucggaguuagcucaagcggGū.....    | 13   | 1 | ya2 |
| .....gggucggaguuagcucaagcggūλ.....    | 2    | 1 | ya2 |
| .....gggucgggλuuagcucaagcgguu.....    | 4    | 1 | ya2 |
| .....gggucggaguuagcucaagcgguu.....    | 1514 | 0 | ya2 |
| .....gggucggaguuagcucaagUgguu.....    | 3    | 1 | ya2 |
| .....gggucggaguuagcucCagcgguu.....    | 1    | 1 | ya2 |
| .....gggucggaguuagcucaUgcgguu.....    | 1    | 1 | ya2 |
| .....gggucggaguuagcuλaagcgguu.....    | 1    | 1 | ya2 |
| .....gggucggaguuagcucaaaCcggu.....    | 2    | 1 | ya2 |
| .....gggucggaguuλucucaagcgguu.....    | 1    | 1 | ya2 |
| .....gggucggaguuagGūcaagcgguu.....    | 1    | 1 | ya2 |
| .....gggucggaguuagcucaagcλgu.....     | 1    | 1 | ya2 |
| .....gggucggaguuagcucaaaUcggu.....    | 5    | 1 | ya2 |
| .....ggguλggaguuagcucaagcgguu.....    | 1    | 1 | ya2 |
| .....gggucggaguuagcucaagcgguuU.....   | 8    | 1 | ya2 |
| .....gggucggaguuagcucaagcgguu.....    | 18   | 0 | ya2 |
| .....gggucggaguuagcucaagcgguuac.....  | 7    | 0 | ya2 |
| .....gggucggaguuagcucaagcgguuacc..... | 1    | 0 | ya2 |
| .....ggucggaguuagcucaagcgguu.....     | 2    | 0 | ya2 |
| .....cggaguuagcucaagcgguu.....        | 4    | 0 | ya2 |
| .....ggaguuagcucaagcgguu.....         | 1    | 0 | ya2 |
| .....ggaguuagcucaagcgguu.....         | 1    | 0 | ya2 |
| .....accuccuacugcggacuuuc.....        | 1    | 0 | ya2 |
| .....cgagacUcgcgggucuuacugacc.....    | 1    | 1 | ya2 |
| .....gaccgcgggucuuacugacc.....        | 1    | 0 | ya2 |
| .....cgcggggucuuacugacc.....          | 7    | 0 | ya2 |
| .....cgcggggucuuacugaGc.....          | 1    | 1 | ya2 |
| .....cgUgggucuuacugacc.....           | 1    | 1 | ya2 |
| .....cgcggggucuuacugacc.....          | 2    | 0 | ya2 |
| .....cgcggggucuuacugaccuu.....        | 2    | 0 | ya2 |
| .....Ugcgggucuuacugaccuuu.....        | 1    | 1 | ya2 |
| .....cgcggggucuuacugaccuλu.....       | 1    | 1 | ya2 |
| .....cgcggggucuuacugaccuuu.....       | 41   | 0 | ya2 |
| .....cgcggggucuuacugaccuuuλ.....      | 1    | 1 | ya2 |
| .....cgcggggucuuacugaccuuu.....       | 1    | 0 | ya2 |
| .....gcggggucuuacugaccuuu.....        | 1    | 0 | ya2 |
| .....accgggucggaguuagcucaagcgg.....   | 1    | 0 | NL3 |
| .....accgggucggaguuagcucaagcgg.....   | 2    | 0 | NL3 |
| .....cccgggucggaguuagcucaagcgguu..... | 1    | 0 | NL3 |
| .....ccgggucggaguuagcucaagcgg.....    | 1    | 0 | NL3 |
| .....ccgggucggaguuagcucaagcgguuU..... | 1    | 1 | NL3 |
| .....cgggucggaguuagcucaagcgg.....     | 11   | 0 | NL3 |
| .....cgggucggaguuagcucaagcgg.....     | 6    | 0 | NL3 |
| .....cgggucggaguuagcucaagcggλ.....    | 2    | 1 | NL3 |
| .....Ggggucggaguuagcucaagcgguu.....   | 2    | 1 | NL3 |
| .....cgggucggaguuagcucaagUgguu.....   | 1    | 1 | NL3 |
| .....cgggucggaguuagcucaagcgguu.....   | 15   | 0 | NL3 |
| .....cgggucggaguuagcucaagcgguu.....   | 1    | 0 | NL3 |
| .....cgggucggaguuagcucaagcgguuU.....  | 1    | 1 | NL3 |
| .....gggucggaguuagcucaagcgg.....      | 6    | 0 | NL3 |
| .....gggucggaguuagcucaagcggλ.....     | 1    | 1 | NL3 |
| .....gggucggaguuagcucaaaAcgg.....     | 1    | 1 | NL3 |
| .....gggucggaguuagcucaagcgg.....      | 43   | 0 | NL3 |
| .....gggucggaguuagcucaagcggGū.....    | 3    | 1 | NL3 |
| .....ggguGggaguuagcucaagcgguu.....    | 1    | 1 | NL3 |



cuaccgggucggaguuagcucaagcgguuuaccuccuacugcgggacuuucuaucuguccaucucugugcgggguuucgagaccgcggggugcuuacugaccuuuuuug

|                                        |     |   |     |
|----------------------------------------|-----|---|-----|
| .....gggucgAaguuagcucaagcgguu.....     | 1   | 1 | NL3 |
| .....gggucggaguuagcGcaagcgguu.....     | 1   | 1 | NL3 |
| .....gggucggaguuagcucaagcgguu.....     | 183 | 0 | NL3 |
| .....gggucggaguuagcucaCgcgguu.....     | 1   | 1 | NL3 |
| .....gAguccggaguuagcucaagcgguu.....    | 1   | 1 | NL3 |
| .....gggucggaguuagcucaagcgguu.....     | 5   | 0 | NL3 |
| .....gggucggaguuagcucaagcgguuU.....    | 3   | 1 | NL3 |
| .....gggucggaguuagcucaagcgguu.....     | 2   | 0 | NL3 |
| .....ucucugugcgggguuucgagac.....       | 1   | 0 | NL3 |
| .....accgggucggaguuagcucaCgcgg.....    | 1   | 1 | s02 |
| .....accgggucggaguuagcucaagcgg.....    | 3   | 0 | s02 |
| .....accgggGcggaguuagcucaagcgguu.....  | 1   | 1 | s02 |
| .....accgggucggaguuagcucaagcgguu.....  | 3   | 0 | s02 |
| .....accgggucggaguuagcucaagcgguu.....  | 4   | 0 | s02 |
| .....Accgggucggaguuagcucaagcgguu.....  | 3   | 1 | s02 |
| .....ccgggucggaguuagcucaagcgguu.....   | 3   | 0 | s02 |
| .....ccgggucggaguuagcucaagc.....       | 1   | 0 | s02 |
| .....ccgggucggaguuagcucaagcgg.....     | 11  | 0 | s02 |
| .....cGgggucggaguuagcucaagcgguu.....   | 1   | 1 | s02 |
| .....ccgggucggaguuUcucaagcgguu.....    | 1   | 1 | s02 |
| .....ccgggucggaguuagcucaagcgguu.....   | 18  | 0 | s02 |
| .....ccgggucggaguuagcucaagcggG.....    | 1   | 1 | s02 |
| .....ccgggucggaguuagcucaagcgguuC.....  | 1   | 1 | s02 |
| .....cGgggucggaguuagcucaagcgguu.....   | 1   | 1 | s02 |
| .....ccgggucggaguuagcucaagcgguu.....   | 2   | 0 | s02 |
| .....ccgggucggaguuagcucaagcgguuAa..... | 1   | 1 | s02 |
| .....ccgggucggaguuagcucaagcgguuU.....  | 2   | 1 | s02 |
| .....cgggucggaguuagcucaagc.....        | 1   | 0 | s02 |
| .....cgggucggaguuagcucaagc.....        | 10  | 0 | s02 |
| .....cgggucggaguuagcucaagcA.....       | 1   | 1 | s02 |
| .....cgggucggaguuagcucaaUcg.....       | 1   | 1 | s02 |
| .....cgggucggagGuaagcucaagcgg.....     | 1   | 1 | s02 |
| .....cggCucggaguuagcucaagcgg.....      | 1   | 1 | s02 |
| .....cgggucggaguuagcucaCgcgg.....      | 4   | 1 | s02 |
| .....Ggggucggaguuagcucaagcgg.....      | 1   | 1 | s02 |
| .....cgggucggaguuagcucaagcggA.....     | 3   | 1 | s02 |
| .....cgggucggaguuagcucaaUcgg.....      | 6   | 1 | s02 |
| .....cgggGcggaguuagcucaagcgg.....      | 13  | 1 | s02 |
| .....cgggucggaguuagcucCagcgg.....      | 4   | 1 | s02 |
| .....cgggucggaguuagcucaagcgg.....      | 240 | 0 | s02 |
| .....cgggAcggaguuagcucaagcgg.....      | 1   | 1 | s02 |
| .....cgggucggaguuagcucaagcggU.....     | 1   | 1 | s02 |
| .....cgggucggaguuagcucaagcUg.....      | 2   | 1 | s02 |
| .....cUgggucggaguuagcucaagcgg.....     | 2   | 1 | s02 |
| .....cgggucggaguuCgcucaagcgguu.....    | 1   | 1 | s02 |
| .....Ggggucggaguuagcucaagcgguu.....    | 3   | 1 | s02 |
| .....cgggucggaguuagcucaagcggA.....     | 11  | 1 | s02 |
| .....cgggucggaguuagcucaagcggC.....     | 3   | 1 | s02 |
| .....cgggucggaguuagcucaagcUgu.....     | 3   | 1 | s02 |
| .....cgggucggagCuagcucaagcgguu.....    | 1   | 1 | s02 |
| .....cgggucggaguuagcucaagcggUu.....    | 2   | 1 | s02 |
| .....cgggucggaguuagcucaaCcggu.....     | 1   | 1 | s02 |
| .....cgggucgUaguuagcucaagcgguu.....    | 2   | 1 | s02 |
| .....cgggucggaguuagcucaCgcgguu.....    | 6   | 1 | s02 |
| .....cgggucggaguuagcucaagcgguu.....    | 545 | 0 | s02 |
| .....cUgggucggaguuagcucaagcgguu.....   | 2   | 1 | s02 |
| .....cgggucggaguuagGuaagcgguu.....     | 1   | 1 | s02 |
| .....cgggucggaguuUcucaagcgguu.....     | 1   | 1 | s02 |
| .....cgggucggaguuagcucCagcgguu.....    | 3   | 1 | s02 |
| .....cgggucggAuuagcucaagcgguu.....     | 1   | 1 | s02 |
| .....cgggAcggaguuagcucaagcgguu.....    | 1   | 1 | s02 |
| .....cgggUAggaguuagcucaagcgguu.....    | 1   | 1 | s02 |
| .....cgggucggagGuaagcucaagcgguu.....   | 5   | 1 | s02 |
| .....cgggGcggaguuagcucaagcgguu.....    | 37  | 1 | s02 |
| .....cggguUggaguuagcucaagcgguu.....    | 3   | 1 | s02 |
| .....cggUucggaguuagcucaagcgguu.....    | 1   | 1 | s02 |
| .....cgggucggaguuagcucaagcggG.....     | 1   | 1 | s02 |
| .....cgggucggaguuagcucaaUcgguu.....    | 10  | 1 | s02 |

cuaccgggucgggaguuagcucaagcgguuaccuccuacugcgggacuuucuaucuguccaucucugucgggguuucgagaccgcggggucuuacugaccuuuuuug

|                                        |    |   |     |
|----------------------------------------|----|---|-----|
| .....cgggCcgaguuagcucaagcgggu.....     | 1  | 1 | s02 |
| .....cgggucgggaguuagcucaagcggGu.....   | 1  | 1 | s02 |
| .....cgggucgggaaUuuagcucaagcgggu.....  | 1  | 1 | s02 |
| .....cgggGcggaguuagcucaagcgggu.....    | 7  | 1 | s02 |
| .....cgggucgggaguuagcucaagUgggu.....   | 1  | 1 | s02 |
| .....cgggucgggaguuagcucaaUcgggu.....   | 1  | 1 | s02 |
| .....cgggucgggaguuagcucaCgcgggu.....   | 3  | 1 | s02 |
| .....cgggucgggaguuagcucaagcUguu.....   | 1  | 1 | s02 |
| .....cgggucgggagGuaagcucaagcgggu.....  | 1  | 1 | s02 |
| .....cgggucgggaguuagcucCagcgggu.....   | 1  | 1 | s02 |
| .....cgggucgggaguuagcucaagAgggu.....   | 1  | 1 | s02 |
| .....cgggucgUaguuagcucaagcgggu.....    | 1  | 1 | s02 |
| .....cgggucgggaguuagcucaagcgggu.....   | 68 | 0 | s02 |
| .....cgggucgggaguuagcucaagcggua.....   | 32 | 1 | s02 |
| .....cgggucgggaguuagcucaagcggCu.....   | 1  | 1 | s02 |
| .....cgggucgggaguuagLucaagcgggu.....   | 1  | 1 | s02 |
| .....cCggucgggaguuagcucaagcgggu.....   | 1  | 1 | s02 |
| .....cgggucgggaguuagcucaagcgguaA.....  | 14 | 1 | s02 |
| .....cgggucgggaguuagcucaagcgguaGa..... | 1  | 1 | s02 |
| .....cgggucgggaguuagcucaagcggguua..... | 1  | 0 | s02 |
| .....cgggucgggaguuagcucaagcgguuU.....  | 26 | 1 | s02 |
| .....cgggucgggaguuagcucaagcgguuU.....  | 2  | 1 | s02 |
| .....gggucgggaguuagcucaagcgg.....      | 4  | 0 | s02 |
| .....gggucgggaguuagcucCagcgggu.....    | 1  | 1 | s02 |
| .....gggGcggaguuagcucaagcgggu.....     | 1  | 1 | s02 |
| .....gggucgggaguuagcucaaUcgggu.....    | 1  | 1 | s02 |
| .....gggucgggaguuagcucaagcgggu.....    | 21 | 0 | s02 |
| .....gggucgggaguuagcucCagcgggu.....    | 1  | 1 | s02 |
| .....gggucgggaguuagcucaagcgguaA.....   | 4  | 1 | s02 |
| .....gggucgggaguuUcuaagcgggu.....      | 1  | 1 | s02 |
| .....gggucgggaguuagcucaagcggLu.....    | 1  | 1 | s02 |
| .....gggucgggaguuagcucaagcgggu.....    | 13 | 0 | s02 |
| .....gggucgggaguuagcucaagcggguua.....  | 2  | 0 | s02 |
| .....gggucgggaguuagcucaagcgguuU.....   | 5  | 1 | s02 |
| .....gggucgggaguuagcucaagcgguuac.....  | 1  | 0 | s02 |
| .....gggucgggaguuagcucaagcgguuacc..... | 1  | 0 | s02 |
| .....uaccuccuacugcgggacuuuc.....       | 1  | 0 | s02 |
| .....cgcCggugcuuacugaccuu.....         | 1  | 1 | s02 |
| .....cgcgggugcuuacugaccuu.....         | 8  | 0 | s02 |
| .....cgcgggugcuuacugaccUuu.....        | 1  | 1 | s02 |
| .....cgcgggugcuuacugaccuuuu.....       | 12 | 0 | s02 |
| .....cgcgggugcuuacugaccuuA.....        | 1  | 1 | s02 |
| .....cgcgggGgcuuacugaccuu.....         | 1  | 1 | s02 |
| .....cgcgggugcuuacugaccuuuu.....       | 1  | 0 | s02 |
| .....accgggucgggaguuagcucaagcgggu..... | 1  | 0 | k06 |
| .....cgggucgggaguuagcucaagcgg.....     | 3  | 0 | k06 |
| .....cgggucgggaguuagcucaagcggG.....    | 1  | 1 | k06 |
| .....cgggucgggaguuagcucaagcgggu.....   | 3  | 0 | k06 |
| .....cgggucgggaguuagcucaagcgggu.....   | 1  | 0 | k06 |
| .....gggucgggaguuagcucaagcgg.....      | 2  | 0 | k06 |
| .....gggucgggaguuagcucaagcgggu.....    | 2  | 0 | k06 |
| .....gggucgggaguuagcucaCgcgggu.....    | 1  | 1 | k06 |
| .....gggucgggaguuagcucaagcggGu.....    | 1  | 1 | k06 |
| .....gggucgggaguuagcucaagcggCu.....    | 1  | 1 | k06 |
| .....gggucgggaguuagcucaagcAguua.....   | 1  | 1 | k06 |
| .....gggucgggaguuagcucaagcggguua.....  | 2  | 0 | k06 |
| .....gggucgggaguuagcucaagcgguuac.....  | 1  | 0 | k06 |
| .....cgcgggugcuuacugaccuu.....         | 2  | 0 | k06 |
| .....cgcgggugcuuacugaccuuuu.....       | 1  | 0 | k06 |
| .....accgggucgggaguuagcu.....          | 1  | 0 | sh2 |
| .....accgggucgggaguuagcuca.....        | 1  | 0 | sh2 |
| .....accgggucgggaguuagcucaa.....       | 2  | 0 | sh2 |
| .....accgggucgggaguuagcucaU.....       | 1  | 1 | sh2 |
| .....accgggucgggaguuagcucaag.....      | 1  | 0 | sh2 |
| .....accgggucgggaguuagcucaaU.....      | 1  | 1 | sh2 |
| .....accgggucgggaguuagcucaagc.....     | 4  | 0 | sh2 |
| .....accgggucgggaguuagcuca.....        | 2  | 1 | sh2 |

cuaccgggucggaguuagcucaagcgguuaccuccuacugcggacuuucuaucuguccaucucugucgggguuucgagaccgcgggugcuuacugaccuuuuuag

|                                  |     |   |     |
|----------------------------------|-----|---|-----|
| ...Ucgggucggaguuagcucaagcggg...  | 1   | 1 | sh2 |
| ...Ggggucggaguuagcuca...         | 2   | 1 | sh2 |
| ...cgggucggaguuagcucaagc...      | 2   | 0 | sh2 |
| ...Ggggucggaguuagcucaagcg...     | 3   | 1 | sh2 |
| ...cgggucggaguuagcucaagcg...     | 4   | 0 | sh2 |
| ...cgggucggaguuagcucaagcgA...    | 3   | 1 | sh2 |
| ...cgggucggaguuagcucaaaUcgg...   | 1   | 1 | sh2 |
| ...cgggucggaguuagcucaagcgg...    | 19  | 0 | sh2 |
| ...cgggucggaguuagcucaagcggg...   | 39  | 0 | sh2 |
| ...cgggucggaguuagcucaagcggC...   | 1   | 1 | sh2 |
| ...cgggucggaguuagcucaagcggA...   | 2   | 1 | sh2 |
| ...cgggucggaguuagcucaagGggg...   | 1   | 1 | sh2 |
| ...Ggggucggaguuagcucaagcggg...   | 1   | 1 | sh2 |
| ...cgggucggaguuagcucUagcggg...   | 1   | 1 | sh2 |
| ...cgggGcggaguuagcucaagcggg...   | 1   | 1 | sh2 |
| ...Agggucggaguuagcucaagcgggu...  | 1   | 1 | sh2 |
| ...Ggggucggaguuagcucaagcgggu...  | 1   | 1 | sh2 |
| ...cgggucggaguuagcucaagcgggA...  | 1   | 1 | sh2 |
| ...cgggucggaguuagcucaagcgggu...  | 16  | 0 | sh2 |
| ...gggucggaguuagcucaagc...       | 4   | 0 | sh2 |
| ...gggucggaguuagcucaagcgg...     | 1   | 0 | sh2 |
| ...gggucggaguuagcucaagcggg...    | 10  | 0 | sh2 |
| ...gggucggaguuagcucaagcggA...    | 1   | 1 | sh2 |
| ...gggucggGuuagcucaagcggg...     | 1   | 1 | sh2 |
| ...gggucggaguuagcucaagcggg...    | 19  | 0 | sh2 |
| ...gggucggaguuagUucaagcggg...    | 1   | 1 | sh2 |
| ...gggucggaguuagcucaagcggA...    | 1   | 1 | sh2 |
| ...gggGcggaguuagcucaagcggg...    | 1   | 1 | sh2 |
| ...gggucggaguuagcucaaaUcgggu...  | 1   | 1 | sh2 |
| ...gggucggaguuagcucaagcggUuu...  | 1   | 1 | sh2 |
| ...gggucggagCuagcucaagcgggu...   | 1   | 1 | sh2 |
| ...ggAucggaguuagcucaagcgggu...   | 1   | 1 | sh2 |
| ...gggGcggaguuagcucaagcgggu...   | 1   | 1 | sh2 |
| ...gggucggaguuagcucaagcgggu...   | 169 | 0 | sh2 |
| ...gggucggaguuagcucaagcUggu...   | 1   | 1 | sh2 |
| ...gggucggaguuagcucCagcgggu...   | 2   | 1 | sh2 |
| ...gUgucggaguuagcucaagcgggu...   | 1   | 1 | sh2 |
| ...Uggucggaguuagcucaagcgggu...   | 1   | 1 | sh2 |
| ...gggucggaguuagcucaagcggguU...  | 1   | 1 | sh2 |
| ...gggucggaguuagcucaagcggguG...  | 1   | 1 | sh2 |
| ...gggucggaguuagcucaagcggguac... | 2   | 0 | sh2 |
| ...gggucAgaguuagcucaagcggguac... | 2   | 1 | sh2 |
| ...ggucggaguuagcucaagcggg...     | 1   | 0 | sh2 |
| ...ggucggaguuagcucaagcgggu...    | 2   | 0 | sh2 |
| ...ggaguuagcucaagcgggu...        | 1   | 0 | sh2 |
| ...gcucaagcggguaccucc...         | 2   | 0 | sh2 |
| ...gcucaagcggguaccuccuca...      | 1   | 0 | sh2 |
| ...gcgguuaccuccucUgcccggac...    | 1   | 1 | sh2 |
| ...gcgguuaccuccuacugcccggac...   | 2   | 0 | sh2 |
| ...Ccgguuaccuccuacugcccggacu...  | 2   | 1 | sh2 |
| ...uuucuaucuguccaucucugug...     | 2   | 0 | sh2 |
| ...cugugcugggguucgagac...        | 1   | 0 | sh2 |
| ...ugugcugggguucgagac...         | 1   | 0 | sh2 |
| ...gugcugggguucgagaccc...        | 1   | 0 | sh2 |
| ...gugcugggguucgagacccgcggu...   | 3   | 0 | sh2 |
| ...guucgagaccgcgggCgc...         | 1   | 1 | sh2 |
| ...agaccgcgggucuuacugaccc...     | 3   | 0 | sh2 |
| ...agaccgcgggucuuacugacccuu...   | 1   | 0 | sh2 |
| ...gaccgcgggucuuacugacccuuu...   | 6   | 0 | sh2 |
| ...gaccgcgggGgcuuacugacccuuu...  | 1   | 1 | sh2 |
| ...accgcgggucuuacugacccu...      | 2   | 0 | sh2 |
| ...aUccgcgggucuuacugacccu...     | 1   | 1 | sh2 |
| ...accgcgggucuuacuUaccuuu...     | 1   | 1 | sh2 |
| ...accgcgggucuuacugacccuuu...    | 6   | 0 | sh2 |
| ...accgcgggucuuacugacccuuuu...   | 6   | 0 | sh2 |
| ...cccggggucuuacugacccuu...      | 2   | 0 | sh2 |
| ...cccggggucuuacugacccuuu...     | 2   | 0 | sh2 |
| ...cccggggucuuacugacccuuu...     | 2   | 0 | sh2 |
| ...cccggggucuuacugacccuuu...     | 2   | 0 | sh2 |
| ...cccggggucuuacugacccuuu...     | 1   | 1 | sh2 |

cuaccgggucggaguuagcucaagcgguuaccuccuacugcggacuucuaucuguccaucucugucgggguuacgagaccgcggggucuuacugaccuuuuuag

|                                      |     |   |     |
|--------------------------------------|-----|---|-----|
| .....ccgcgggugcuuacugaccuu.....      | 1   | 0 | sh2 |
| .....ccgcgggugcuuacugaccuuuu.....    | 1   | 0 | sh2 |
| .....cgcgggugcuuacugacc.....         | 2   | 0 | sh2 |
| .....cgcgggugcuuacugaccuu.....       | 2   | 0 | sh2 |
| .....cgcgggugcuuacugaccuu.....       | 5   | 0 | sh2 |
| .....cgcgggugcuuacugaccAuu.....      | 1   | 1 | sh2 |
| .....cgcgggGgcuuacugaccuu.....       | 1   | 1 | sh2 |
| .....cgcgggugcuuacugaccuuA.....      | 1   | 1 | sh2 |
| .....cgcgggugcuuacugaccuu.....       | 30  | 0 | sh2 |
| .....cgcgggugcuuacugaccuuuA.....     | 3   | 1 | sh2 |
| .....gcgggugcuuacugaccuu.....        | 1   | 0 | sh2 |
| .....ccgggucggaguuagcucaagcgg.....   | 2   | 0 | j29 |
| .....ccgggucggaguuagcucaagcgguu..... | 1   | 0 | j29 |
| .....cgggucggaguuagcucaagcUg.....    | 1   | 1 | j29 |
| .....cgggucggaguuagcucaagcgg.....    | 20  | 0 | j29 |
| .....cgggucggaguuagcucaagcAg.....    | 1   | 1 | j29 |
| .....Ggggucggaguuagcucaagcgg.....    | 3   | 1 | j29 |
| .....cgggucggaguuagcucaagcggA.....   | 3   | 1 | j29 |
| .....cgggucggaguuagcucaagcgg.....    | 22  | 0 | j29 |
| .....cgggucggaguuagcucaagcggA.....   | 1   | 1 | j29 |
| .....cgggucggaguuagcucaagcgguu.....  | 5   | 0 | j29 |
| .....gggucggaguuagcucaagcgg.....     | 2   | 0 | j29 |
| .....gggucggaguuagcucaagcgg.....     | 11  | 0 | j29 |
| .....gggucggaguuagcucaagcgguu.....   | 24  | 0 | j29 |
| .....gggucggaguuagcucaagcgguuU.....  | 1   | 1 | j29 |
| .....ggucggaguuagcucaagcggA.....     | 1   | 1 | j29 |
| .....cgcgggugcuuacugaccuu.....       | 3   | 0 | j29 |
| .....gcgggugcuuacugaccuu.....        | 1   | 0 | j29 |
| .....cgggucggaguuagcucaagUgg.....    | 1   | 1 | MCF |
| .....cccgggucggaguuagcucaagcgg.....  | 1   | 0 | j01 |
| .....ccCggucggaguuagcucaagcgg.....   | 1   | 1 | j01 |
| .....ccgggucggaguuagcucaagcgcC.....  | 1   | 1 | j01 |
| .....ccgggucggaguuagcucaagcgg.....   | 2   | 0 | j01 |
| .....ccgggucggaguuagcucaagcgg.....   | 4   | 0 | j01 |
| .....ccgggucggaguuUcuaagcgg.....     | 1   | 1 | j01 |
| .....cgggucggaguuagcucaagc.....      | 5   | 0 | j01 |
| .....cgggucggaguuagcucaagcgg.....    | 3   | 0 | j01 |
| .....cgggGcggaguuagcucaagcgg.....    | 1   | 1 | j01 |
| .....cgggucggaguuagcucGagcgg.....    | 1   | 1 | j01 |
| .....cgggucggaguuagcucaagcgtU.....   | 1   | 1 | j01 |
| .....cgggucggaguuagcucaaUcgg.....    | 1   | 1 | j01 |
| .....cgggucggaguuagcucaagcgg.....    | 63  | 0 | j01 |
| .....cgggucggaguuagcucaagcCg.....    | 1   | 1 | j01 |
| .....cgggAcggaguuagcucaagcgg.....    | 1   | 1 | j01 |
| .....cgggucggaguuagcucaagcgg.....    | 113 | 0 | j01 |
| .....cgggucggCguuagcucaagcgg.....    | 2   | 1 | j01 |
| .....cgggucggaguuagcucaaUcgg.....    | 1   | 1 | j01 |
| .....cgggucggaguuagcucaCgcgg.....    | 2   | 1 | j01 |
| .....cgggucggaguuagUucaagcgg.....    | 1   | 1 | j01 |
| .....cgggucggagGuaagcucaagcgg.....   | 1   | 1 | j01 |
| .....cgggucggaguuagcucaagcggA.....   | 15  | 1 | j01 |
| .....cgggucggaguuagcucaagcggG.....   | 1   | 1 | j01 |
| .....cgggucggaguuagcucaagcgguu.....  | 2   | 0 | j01 |
| .....cgggucggaguuagcucaagcggA.....   | 10  | 1 | j01 |
| .....cgggucggaguuagcucaagcgguuA..... | 1   | 0 | j01 |
| .....cgggucggaguuagcucaagcggAa.....  | 4   | 1 | j01 |
| .....gggucggaguuagcucaagcgg.....     | 9   | 0 | j01 |
| .....gggCcgaguuagcucaagcgg.....      | 1   | 1 | j01 |
| .....gggGcggaguuagcucaagcgg.....     | 1   | 1 | j01 |
| .....gggucggaguuagcucaaUcgg.....     | 1   | 1 | j01 |
| .....gggucggGguuagcucaagcgg.....     | 1   | 1 | j01 |
| .....gggucggaguuagcucaagcggC.....    | 1   | 1 | j01 |
| .....gggucggaguuagcucaagcggA.....    | 1   | 1 | j01 |
| .....gggucggaguuagcucaagcgg.....     | 30  | 0 | j01 |
| .....gggucggagCuagcucaagcgg.....     | 1   | 1 | j01 |
| .....gggucggaguuagcucaagcgguu.....   | 2   | 0 | j01 |

cuaccgggucggaguuagcucaagcgguuaccuccuacugcgggacuuucuaucuguccaucucugucgggguuucgagaccgcggggugcuuacugaccuuuuuag

|                                                |    |   |     |
|------------------------------------------------|----|---|-----|
| .....gggucggaguuagcucaagcggua.....             | 13 | 1 | j01 |
| .....gggucggaguuagcucaagcgguaa.....            | 3  | 1 | j01 |
| .....cgcgggugcuuacugaccuu.....                 | 14 | 0 | j01 |
| .....cgcgggAgcuuacugaccuu.....                 | 1  | 1 | j01 |
| .....cgcgggugcuuacugaccuuu.....                | 7  | 0 | j01 |
| ..accgggucggaguuagcucaa.....                   | 1  | 0 | NL1 |
| ..ccgggucggaguuagcucaagc.....                  | 1  | 0 | NL1 |
| ..Accgggucggaguuagcucaagcgg.....               | 2  | 1 | NL1 |
| .....Ggggucggaguuagcucaagcgg.....              | 1  | 1 | NL1 |
| .....cgggucggaguuagLucaagcgg.....              | 1  | 1 | NL1 |
| .....cgggucggaguuagcucaagcgg.....              | 9  | 0 | NL1 |
| .....cgggucggaguuagUucaagcgg.....              | 1  | 1 | NL1 |
| .....cgggGcggaguuagcucaagcgg.....              | 1  | 1 | NL1 |
| .....cgggucggaguuagcucaagcggA.....             | 1  | 1 | NL1 |
| .....cgggGcggaguuagcucaagcgg.....              | 1  | 1 | NL1 |
| .....cgggucggaguuagcucaagcgg.....              | 30 | 0 | NL1 |
| .....cgggucggaguuagcucaagcgguu.....            | 2  | 0 | NL1 |
| .....cgggucggaguuagcucaagcgguuu.....           | 1  | 0 | NL1 |
| .....cgggucggaguuagcucaagcgguaa.....           | 1  | 1 | NL1 |
| .....cgggucggaguuagcucaagcgguuU.....           | 3  | 1 | NL1 |
| .....gggucggaguuagcucaagcgg.....               | 2  | 0 | NL1 |
| .....gggucggaguuagcucaagcgg.....               | 15 | 0 | NL1 |
| .....gggucggaguuagcucaagcggua.....             | 1  | 1 | NL1 |
| .....gggucggaguuagcGcaagcgguu.....             | 1  | 1 | NL1 |
| .....gggucggaguuagcCcaagcgguu.....             | 1  | 1 | NL1 |
| .....gggucggaguuagcucaagcgguu.....             | 51 | 0 | NL1 |
| .....gggucggaguuagcucaagcgguuu.....            | 2  | 0 | NL1 |
| .....gggucggaguuagcGcaagcgguuacc.....          | 1  | 1 | NL1 |
| .....ucggaguuagcucaagcgguuu.....               | 1  | 0 | NL1 |
| .....gaccgcgggugcuuacugaccuuu.....             | 1  | 0 | NL1 |
| .....gaccgcgggugcuuacugaccuuuu.....            | 1  | 0 | NL1 |
| .....accgcgggugcuuacugaccuu.....               | 1  | 0 | NL1 |
| .....cgcgggugcuuacugaccuu.....                 | 1  | 0 | NL1 |
| .....cgcgggugcuuacugaccuuu.....                | 1  | 0 | NL1 |
| .....ccgggucggaguuagcucaa.....                 | 1  | 0 | MBM |
| .....ccgggucggaguuagcucaagcgg.....             | 2  | 0 | MBM |
| .....cgggucggaguuagcuca.....                   | 2  | 0 | MBM |
| .....cgggucggaguuagcucaag.....                 | 1  | 0 | MBM |
| .....cgggucggaguuUucaag.....                   | 1  | 1 | MBM |
| .....cgggucggaguuagcucaagc.....                | 4  | 0 | MBM |
| .....cgggucggaguuagcucaagcA.....               | 3  | 1 | MBM |
| .....cgggucggaguuagcucaagcgg.....              | 4  | 0 | MBM |
| .....cgggucggaguuagcucaagcU.....               | 1  | 1 | MBM |
| .....cgggucggaguuagcucaagcG.....               | 3  | 1 | MBM |
| .....cgggucggaguuagcucaagcgg.....              | 1  | 1 | MBM |
| .....cgggucggaguuagcucaagcgg.....              | 27 | 0 | MBM |
| .....cgggucggaguuagcucaagcGU.....              | 2  | 1 | MBM |
| .....cgggucggaguuagcucaagcgg.....              | 37 | 0 | MBM |
| .....cgggucggaguuagcucaagcLgu.....             | 1  | 1 | MBM |
| .....cgggucggaguuagcucaagcggA.....             | 1  | 1 | MBM |
| .....cgggGcggaguuagcucaagcgg.....              | 1  | 1 | MBM |
| .....cgggucggaguuagcucaagcggua.....            | 2  | 1 | MBM |
| .....cgggucLgaguuagcucaagcgguu.....            | 1  | 1 | MBM |
| .....cgggucggaguuagcucaagcggLu.....            | 1  | 1 | MBM |
| .....cgggucggaguuagcucaagcggUG.....            | 1  | 1 | MBM |
| .....cgggucggaguuagcucaagcgguu.....            | 9  | 0 | MBM |
| .....cgggucggaguuagcucaagcgguaa.....           | 1  | 1 | MBM |
| .....cgggucggaguuagcucaagcgguuU.....           | 1  | 1 | MBM |
| .....cgggucggaguuagcucaagcgguuu.....           | 1  | 0 | MBM |
| .....gggucggaguuagcucaagcgg.....               | 4  | 0 | MBM |
| .....gggucggaguuagcucaagcgg.....               | 2  | 0 | MBM |
| .....gggucggaguuagcucaagcgguu.....             | 2  | 0 | MBM |
| .....gggucggaguuagcucaagcgguuu.....            | 2  | 0 | MBM |
| .....gggucggaguuagcucaagcgguuu.....            | 1  | 0 | MBM |
| .....gggucggaguuagcucaagcgguaa.....            | 1  | 1 | MBM |
| .....gggucggaguuagcucaagcgguuaccucc.....       | 1  | 0 | MBM |
| .....gggucggaguuagcucaagcgguuacAuccucaugc..... | 1  | 1 | MBM |
| .....gggucggaguuagcucaagcgguuaccuccucaugc..... | 1  | 0 | MBM |

cuaccgggucggaguuagcucaagcgguuaccuccuacugcgggacuuucuaucuguccaucucugucgggguuucgagacccgcgggugcuuacugaccuuuuuug

|                                          |     |   |     |
|------------------------------------------|-----|---|-----|
| .....ggucggaguuagcucaagcgguuaccuccu..... | 1   | 0 | MBM |
| .....aucucugucgucgggguuucgagacc.....     | 1   | 0 | MBM |
| .....gUgguuucgagacccgcggg.....           | 1   | 1 | MBM |
| .....Ugguuucgagacccgcggg.....            | 7   | 1 | MBM |
| .....accgcgggugcuuacugaccuu.....         | 2   | 0 | MBM |
| .....accgcgggugcuuacugaccuu.....         | 1   | 0 | MBM |
| .....accgcgggugcuuacugaccuuuu.....       | 1   | 0 | MBM |
| .....ccgcgggugcuuacugaccuu.....          | 1   | 0 | MBM |
| .....cgcgggugcuuacugacc.....             | 1   | 0 | MBM |
| .....cgcgggugcuuacugaccuu.....           | 1   | 0 | MBM |
| .....cgcgggugcuuacugaccuu.....           | 1   | 0 | MBM |
| .....cgcgggugcuuacugaccuu.....           | 15  | 0 | MBM |
| .....cgcgggugcuuacugaccuuA.....          | 1   | 1 | MBM |
| .....cgggucggaguuagcucaagcgg.....        | 1   | 0 | k07 |
| .....gggucggaguuagcucaagcgg.....         | 2   | 0 | k07 |
| .....gggucggaguuagcucaagcgg.....         | 1   | 0 | k07 |
| .....gggucggaguuagcucaagcggG.....        | 1   | 1 | k07 |
| .....gggucggaguuagcucaagcgguu.....       | 3   | 0 | k07 |
| .....cgcgggugcuuacugaccuu.....           | 1   | 1 | k07 |
| .....cgcgggugcuuacugaccuu.....           | 1   | 0 | k07 |
| .....cgcgggugcuuacugaccuu.....           | 1   | 0 | k07 |
| .....cgcgggugcuuacugaccuuuA.....         | 1   | 1 | k07 |
| .....cccgggucggaguuagcucaagcgg.....      | 1   | 0 | sh1 |
| .....cccgggucggaguuagcucaagcgg.....      | 1   | 0 | sh1 |
| .....ccgggucggaguuagcucaagcgg.....       | 2   | 0 | sh1 |
| .....ccgggucggaguuagcucaagcgg.....       | 1   | 0 | sh1 |
| .....ccgggucggaguuagcucaagcgguu.....     | 1   | 0 | sh1 |
| .....cgggucggaguuagcucaagcgg.....        | 3   | 0 | sh1 |
| .....cgggucggaguuagcucaagcgg.....        | 29  | 0 | sh1 |
| .....Ggggucggaguuagcucaagcgg.....        | 1   | 1 | sh1 |
| .....Ggggucggaguuagcucaagcgg.....        | 2   | 1 | sh1 |
| .....cgggucggaguuagcucaagcggG.....       | 1   | 1 | sh1 |
| .....cgggucggaguuagcucaagcgg.....        | 74  | 0 | sh1 |
| .....cgggucggaguuagcucaagcgg.....        | 2   | 1 | sh1 |
| .....Ggggucggaguuagcucaagcgguu.....      | 8   | 1 | sh1 |
| .....cgggucggaguuagcucaagcggA.....       | 4   | 1 | sh1 |
| .....Ugggucggaguuagcucaagcgguu.....      | 1   | 1 | sh1 |
| .....cgggucggaguuagcucaagcgguu.....      | 25  | 0 | sh1 |
| .....cgggucggaguuagcucaagcggAa.....      | 1   | 1 | sh1 |
| .....cgggucggaguuagcucaagcggua.....      | 1   | 0 | sh1 |
| .....gggucggaguuagcucaag.....            | 1   | 0 | sh1 |
| .....gggucggaguuagcucaagcgg.....         | 7   | 0 | sh1 |
| .....gggucggaguuagcucaagcAgu.....        | 1   | 1 | sh1 |
| .....gggucggaguuagcucaagcgg.....         | 32  | 0 | sh1 |
| .....gggucggaguuagcucaagcggG.....        | 1   | 1 | sh1 |
| .....gggucggaguuagcAcaagcgguu.....       | 1   | 1 | sh1 |
| .....gggucggaguuagcucaagcggGu.....       | 1   | 1 | sh1 |
| .....gggucggaguuagcucaagcgguu.....       | 148 | 0 | sh1 |
| .....gggucggaguuagcucaagcggAa.....       | 1   | 1 | sh1 |
| .....gggucggaguuagcucaagcggua.....       | 3   | 0 | sh1 |
| .....gggucggaguuagcucaagcgguuac.....     | 2   | 0 | sh1 |
| .....cugugcgggguuucgagac.....            | 2   | 0 | sh1 |
| .....cgcgggugcuuacugaccuu.....           | 2   | 1 | sh1 |
| .....cgcgggugcuuacugaccuu.....           | 12  | 0 | sh1 |
| .....cgcgggugcuuacugaccuA.....           | 1   | 1 | sh1 |
| .....cgcgggugcuuacugaccuuu.....          | 3   | 0 | sh1 |
| .....accgggucggaguuagcucaagc.....        | 1   | 0 | li1 |
| .....accgggucggaguuagcucaagcgg.....      | 3   | 0 | li1 |
| .....accgCgucggaguuagcucaagcgg.....      | 1   | 1 | li1 |
| .....Accgggucggaguuagcucaagc.....        | 3   | 1 | li1 |
| .....cccgggucggGuuagcucaagcgg.....       | 1   | 1 | li1 |
| .....cccgggucggaguuagcucaagcGU.....      | 1   | 1 | li1 |
| .....cccgggucggaguuagcucaagcgg.....      | 1   | 0 | li1 |
| .....Accgggucggaguuagcucaagcgg.....      | 1   | 1 | li1 |
| .....cccgggucggaguuagcucaagcGC.....      | 1   | 1 | li1 |
| .....cccgggucggaguuagcucaagcGA.....      | 1   | 1 | li1 |

cuaccgggucggaguuagcucaagcgguuaccuccuacugcggacuuucuaucuguccaucucugucgggguuucgagaccgcgggugcuuacugaccuuuuuag

|                                   |     |   |     |
|-----------------------------------|-----|---|-----|
| ...ccgggucggaguuagcucaagcggg...   | 2   | 0 | 111 |
| ...ccgggucggaguuagcucaag...       | 2   | 0 | 111 |
| ...ccgggucggaguuagcucaagc...      | 21  | 0 | 111 |
| ...ccgggucggaguuagcucaagcg...     | 8   | 0 | 111 |
| ...ccggUucggaguuagcucaagcg...     | 1   | 1 | 111 |
| ...cAaggucggaguuagcucaagcg...     | 1   | 1 | 111 |
| ...ccgggucggaguuagcucaagcggA...   | 4   | 1 | 111 |
| ...ccgUgucggaguuagcucaagcggg...   | 1   | 1 | 111 |
| ...ccgCgucggaguuagcucaagcggg...   | 1   | 1 | 111 |
| ...ccgggucggaguuagcucaagcgC...    | 3   | 1 | 111 |
| ...ccgggucggaguuUcuaagcggg...     | 1   | 1 | 111 |
| ...ccgggucggaguuagcucaagAgg...    | 1   | 1 | 111 |
| ...ccgggucggGguagcucaagcggg...    | 1   | 1 | 111 |
| ...ccgggucggaguuagcucaagcUg...    | 1   | 1 | 111 |
| ...ccgggucggaguuagcucaaCcgg...    | 1   | 1 | 111 |
| ...ccggCucggaguuagcucaagcggg...   | 1   | 1 | 111 |
| ...ccgggucggaguuagAuaagcggg...    | 1   | 1 | 111 |
| ...cGgggucggaguuagcucaagcggg...   | 2   | 1 | 111 |
| ...ccgggucggaguuagcucaaUcgg...    | 1   | 1 | 111 |
| ...ccgggucggaguCagcucaagcggg...   | 1   | 1 | 111 |
| ...ccgggucggaguuagcuUaagcggg...   | 1   | 1 | 111 |
| ...ccgggucggaguuagcucaagcggg...   | 113 | 0 | 111 |
| ...ccgggucggaguuagcucaaCcggu...   | 1   | 1 | 111 |
| ...ccgggucggaguuagcucaagcgggC...  | 2   | 1 | 111 |
| ...ccgggCcgaguuagcucaagcgggu...   | 1   | 1 | 111 |
| ...ccgggucggaguuagcucaagcgggA...  | 4   | 1 | 111 |
| ...ccgggucggaguuagcucaagcgggG...  | 1   | 1 | 111 |
| ...cGgggucggaguuagcucaagcgggu...  | 1   | 1 | 111 |
| ...ccgggucgUaguuagcucaagcgggu...  | 1   | 1 | 111 |
| ...ccgggucggaguuagcucaagcgggu...  | 43  | 0 | 111 |
| ...ccgggucggaguuagcucaagcggguu... | 5   | 0 | 111 |
| ...ccgggucggaguuagcucaagcggguA... | 1   | 1 | 111 |
| ...ccgggucggaguuagcucaagcggguu... | 1   | 0 | 111 |
| ...ccgggucggaguuagcucaagcgggu...  | 1   | 0 | 111 |
| ...ccgggucggaguuagcucaagcgggu...  | 4   | 0 | 111 |
| ...ccgggucggaguuagcucaagc...      | 136 | 0 | 111 |
| ...ccgggucggaguuagcucaagcCagc...  | 3   | 1 | 111 |
| ...ccgggucggaguuagcucaagcA...     | 2   | 1 | 111 |
| ...ccgggucggCguuagcucaagc...      | 1   | 1 | 111 |
| ...ccgggucggagCuagcucaagc...      | 3   | 1 | 111 |
| ...ccgggucggaguuagcucaaUc...      | 1   | 1 | 111 |
| ...ccgggucggaguuagcucaagc...      | 1   | 1 | 111 |
| ...ccgggucggaguuUcuaagc...        | 2   | 1 | 111 |
| ...ccgggucggaguuagcucaagU...      | 1   | 1 | 111 |
| ...ccggAucggaguuagcucaagc...      | 1   | 1 | 111 |
| ...ccgggucgggAUuuagcucaagc...     | 1   | 1 | 111 |
| ...ccgggucggaguuCgcucaagc...      | 1   | 1 | 111 |
| ...ccggguUggaguuagcucaagc...      | 1   | 1 | 111 |
| ...ccgggCcgaguuagcucaagc...       | 1   | 1 | 111 |
| ...ccgggucggaguuagcucaaAcg...     | 1   | 1 | 111 |
| ...ccgggucggaguuUcuaagcgg...      | 1   | 1 | 111 |
| ...ccgggucggaguuagcucaagcA...     | 2   | 1 | 111 |
| ...ccgggucggaguuagcucaagAg...     | 1   | 1 | 111 |
| ...ccgUgucggaguuagcucaagcgg...    | 1   | 1 | 111 |
| ...ccgggucggaguuagcucaagcgg...    | 69  | 0 | 111 |
| ...ccgggucggaguuagcucaagGg...     | 1   | 1 | 111 |
| ...ccgggucgCaguagcucaagcgg...     | 1   | 1 | 111 |
| ...ccgggucggaguuagcucCagcg...     | 1   | 1 | 111 |
| ...ccgggucggaguuagcucaaCcg...     | 1   | 1 | 111 |
| ...ccgggucAagaguuagcucaagcgg...   | 1   | 1 | 111 |
| ...cCgggucggaguuagcucaagcgg...    | 1   | 1 | 111 |
| ...ccgggucggaguuagcCcaagcgg...    | 1   | 1 | 111 |
| ...ccgggucgggAUuuagcucaagcggg...  | 4   | 1 | 111 |
| ...ccgggucggaguuagcucaagcCg...    | 2   | 1 | 111 |
| ...ccgggucggaguuUcuaagcggg...     | 4   | 1 | 111 |
| ...ccgggAcgaguuagcucaagcggg...    | 2   | 1 | 111 |
| ...ccgggCcgaguuagcucaagcggg...    | 7   | 1 | 111 |
| ...cAggucggaguuagcucaagcggg...    | 1   | 1 | 111 |
| ...ccgggucgggAUuuagcucaagcggg...  | 1   | 1 | 111 |

cuaccgggucgggaguuagcucaagcgguuaccuccuacugcgggacuuucuaucuguccaucucugugcgggguuucgagaccgcggggugcuuacugaccuuuuuag

|                                      |      |   |     |
|--------------------------------------|------|---|-----|
| .....cggguUggaguuagcucaagcgg.....    | 5    | 1 | 111 |
| .....cgggucgggaguuagcucaagcggU.....  | 20   | 1 | 111 |
| .....Ugggucgggaguuagcucaagcgg.....   | 6    | 1 | 111 |
| .....cgggucggGguuagcucaagcgg.....    | 11   | 1 | 111 |
| .....cgggGcgggaguuagcucaagcgg.....   | 3    | 1 | 111 |
| .....cggUucgggaguuagcucaagcgg.....   | 3    | 1 | 111 |
| .....cggguUaggaguuagcucaagcgg.....   | 3    | 1 | 111 |
| .....cgggucUaggaguuagcucaagcgg.....  | 7    | 1 | 111 |
| .....cgggucgggaguuagcucaagcUg.....   | 3    | 1 | 111 |
| .....Uagggucgggaguuagcucaagcgg.....  | 2    | 1 | 111 |
| .....cgggucgggaguuagcucaaUcgg.....   | 2    | 1 | 111 |
| .....cgggucgggaguuacCcucaagcgg.....  | 3    | 1 | 111 |
| .....cgggucgggaguuagcucaaUcgg.....   | 2    | 1 | 111 |
| .....cgggucgggaguuagcucaagcGΛ.....   | 79   | 1 | 111 |
| .....cgggucgggaguuagcGcaagcgg.....   | 1    | 1 | 111 |
| .....cgCgucgggaguuagcucaagcgg.....   | 1    | 1 | 111 |
| .....cgggucgggaguuagΛucaagcgg.....   | 2    | 1 | 111 |
| .....cgggucggGguuagcucaagcgg.....    | 1    | 1 | 111 |
| .....cgggucgggaguuagcucaagUgg.....   | 14   | 1 | 111 |
| .....Ggggucgggaguuagcucaagcgg.....   | 1    | 1 | 111 |
| .....cgggucgCaguuaagcucaagcgg.....   | 2    | 1 | 111 |
| .....cgggucgggaguuagcucGagcgg.....   | 3    | 1 | 111 |
| .....cgggucCgaguuagcucaagcgg.....    | 5    | 1 | 111 |
| .....cgggucgggaguuagcucaagUgg.....   | 9    | 1 | 111 |
| .....cgggucgggaguuagcucaCgcgg.....   | 8    | 1 | 111 |
| .....cgggucgggaguuagcCcaagcgg.....   | 4    | 1 | 111 |
| .....cggguGggaguuagcucaagcgg.....    | 3    | 1 | 111 |
| .....cgUgucgggaguuagcucaagcgg.....   | 1    | 1 | 111 |
| .....cgggucggUgguuagcucaagcgg.....   | 4    | 1 | 111 |
| .....cgggucgggaguuagcucCagcgg.....   | 5    | 1 | 111 |
| .....cggCucgggaguuagcucaagcgg.....   | 5    | 1 | 111 |
| .....cgggucgggaguuagcucaagcUg.....   | 5    | 1 | 111 |
| .....cgUgucgggaguuagcucaagcgg.....   | 1    | 1 | 111 |
| .....cgggucgggaguuΛcucaagcgg.....    | 2    | 1 | 111 |
| .....cgggucgggaguuagcΛcaagcgg.....   | 3    | 1 | 111 |
| .....cgggucgggaguuUagcucaagcgg.....  | 1    | 1 | 111 |
| .....cgggucgggaguuagcucaagcG.....    | 44   | 1 | 111 |
| .....cgggucgggaguuagcucaGgcgg.....   | 2    | 1 | 111 |
| .....cgggucgggaguuagUucaagcgg.....   | 3    | 1 | 111 |
| .....cgggucgUaguuaagcucaagcgg.....   | 4    | 1 | 111 |
| .....cgggucgggaguuagcuUaagcgg.....   | 1    | 1 | 111 |
| .....cggUucgggaguuagcucaagcgg.....   | 2    | 1 | 111 |
| .....cgggucgggagCuagcucaagcgg.....   | 2    | 1 | 111 |
| .....cgggucgggaguuagcucaagcgg.....   | 2051 | 0 | 111 |
| .....cgggucgggaguuGcucaagcgg.....    | 1    | 1 | 111 |
| .....cgggucgggagGuaagcucaagcgg.....  | 1    | 1 | 111 |
| .....cgggucUgaguuagcucaagcgg.....    | 4    | 1 | 111 |
| .....cgggucgggaguuagcucaaCcg.....    | 2    | 1 | 111 |
| .....cgggucgggaguuagcuUaagcgg.....   | 3    | 1 | 111 |
| .....cgggucgggagUcagcucaagcgg.....   | 4    | 1 | 111 |
| .....cgCgucgggaguuagcucaagcggU.....  | 3    | 1 | 111 |
| .....cgggucUgaguuagcucaagcggU.....   | 6    | 1 | 111 |
| .....cgggUcgggaguuagcucaagcggU.....  | 2    | 1 | 111 |
| .....cgggucgCaguuaagcucaagcggU.....  | 2    | 1 | 111 |
| .....cgggucgggaguuagcucGagcggU.....  | 3    | 1 | 111 |
| .....cgggucgggaguuagcGcaagcggU.....  | 13   | 1 | 111 |
| .....cgggucgggaguuagcucaaUcggU.....  | 4    | 1 | 111 |
| .....cgggucgggaCuuaagcucaagcggU..... | 1    | 1 | 111 |
| .....cggCucgggaguuagcucaagcggU.....  | 4    | 1 | 111 |
| .....cgggucgggagUcagcucaagcggU.....  | 3    | 1 | 111 |
| .....cgggucgggaguuagcucaagcGΛu.....  | 5    | 1 | 111 |
| .....cgggucgggagCuagcucaagcggU.....  | 3    | 1 | 111 |
| .....cgggucgggaguuagcucaagcCgu.....  | 3    | 1 | 111 |
| .....cgggucgggaguuagΛucaagcggU.....  | 3    | 1 | 111 |
| .....cgggucggGguuagcucaagcggU.....   | 2    | 1 | 111 |
| .....cggUucgggaguuagcucaagcggU.....  | 5    | 1 | 111 |
| .....cgggucgggΛuuagcucaagcggU.....   | 3    | 1 | 111 |



cuaccgggucgggaguuagcucaagcgguuaccuccuacugcggacuuucuaucuguccaucucugugcgggguuucgagaccgcgggugcuuacugaccuuuuuag

|                                            |      |   |     |
|--------------------------------------------|------|---|-----|
| .....Ugggucgggaguuagcucaagcgggu.....       | 9    | 1 | 111 |
| .....cgggucgggaguuagcucaagAggu.....        | 18   | 1 | 111 |
| .....cgggucgggaguuCgcucaagcgggu.....       | 5    | 1 | 111 |
| .....cgggucgggaguuagcucaagcGcu.....        | 4    | 1 | 111 |
| .....cCggucgggaguuagcucaagcgggu.....       | 1    | 1 | 111 |
| .....cggguGggaguuagcucaagcgggu.....        | 4    | 1 | 111 |
| .....cgggucgggaguuagcucaagcgggu.....       | 3    | 1 | 111 |
| .....cgggucgggaguuagcucaagcGfu.....        | 37   | 1 | 111 |
| .....cgggucAggaguuagcucaagcgggu.....       | 14   | 1 | 111 |
| .....cgggucggGcuuagcucaagcgggu.....        | 12   | 1 | 111 |
| .....Agggucgggaguuagcucaagcgggu.....       | 4    | 1 | 111 |
| .....cgggucgggaguuagcucaagcAggu.....       | 1    | 1 | 111 |
| .....cgggucgUaguuagcucaagcgggu.....        | 4    | 1 | 111 |
| .....cgggGcgggaguuagcucaagcgggu.....       | 3    | 1 | 111 |
| .....cgggCgggaguuagcucaagcgggu.....        | 6    | 1 | 111 |
| .....cgggucgggaguuAAcucaagcgggu.....       | 1    | 1 | 111 |
| .....cgAgucgggaguuagcucaagcgggu.....       | 1    | 1 | 111 |
| .....cgggucgggaguuagcuUaagcgggu.....       | 3    | 1 | 111 |
| .....cgggucgggaguuagGuaagcgggu.....        | 4    | 1 | 111 |
| .....cgggucggaUuuagcucaagcgggu.....        | 3    | 1 | 111 |
| .....cgggucggUuuuagcucaagcgggu.....        | 6    | 1 | 111 |
| .....cgggucgggaguuagcCcaagcgggu.....       | 5    | 1 | 111 |
| .....cgggucgggaguuagcucaagcggG.....        | 211  | 1 | 111 |
| .....cgggucgggaguuagcAcaagcgggu.....       | 8    | 1 | 111 |
| .....cgggucgggaguuagcucaagcggA.....        | 222  | 1 | 111 |
| .....cgggucCgaguuagcucaagcgggu.....        | 6    | 1 | 111 |
| .....cggguAggaguuagcucaagcgggu.....        | 1    | 1 | 111 |
| .....cggAucgggaguuagcucaagcgggu.....       | 6    | 1 | 111 |
| .....cgggucgggaguuagUucaagcgggu.....       | 2    | 1 | 111 |
| .....cgggucgggaguuagcucCagcgggu.....       | 7    | 1 | 111 |
| .....cgggucgggaguuagcucaCgcgggu.....       | 11   | 1 | 111 |
| .....cgggucgggaguuagcucaagcgggu.....       | 3404 | 0 | 111 |
| .....cgggucgggaguuagcucaagcggC.....        | 225  | 1 | 111 |
| .....cgggucgggaguuA Ccucaagcgggu.....      | 2    | 1 | 111 |
| .....cgggucgggaguuagcucaA Ccgggu.....      | 4    | 1 | 111 |
| .....cgggucgggaguuagcucaagcUgu.....        | 2    | 1 | 111 |
| .....cgggucgggaguuAUcucuagcgggu.....       | 12   | 1 | 111 |
| .....cgggucgggaguuagcucaGgcgggu.....       | 1    | 1 | 111 |
| .....cggguUggaguuagcucaagcgggu.....        | 2    | 1 | 111 |
| .....cUggucgggaguuagcucaagcgggu.....       | 1    | 1 | 111 |
| .....cgggucgggaguuagcucaagUggu.....        | 25   | 1 | 111 |
| .....cgggucgggaguuagcuUaagcgggu.....       | 1    | 1 | 111 |
| .....cgggucgggaguuagcucaagcggCu.....       | 1    | 1 | 111 |
| .....cgggucgggaguuagcucaagcggguA.....      | 71   | 1 | 111 |
| .....cgggCgggaguuagcucaagcggguu.....       | 1    | 1 | 111 |
| .....cgggucgggaguuagcucaagAgguu.....       | 1    | 1 | 111 |
| .....cggAucgggaguuagcucaagcggguu.....      | 1    | 1 | 111 |
| .....cgggucgggaguuagcucaagcggGu.....       | 6    | 1 | 111 |
| .....cgggucgggaguuagcucaagcggguG.....      | 2    | 1 | 111 |
| .....cgggucgggaguuagcucaagcggguu.....      | 109  | 0 | 111 |
| .....cgggucgggaguuagcucaagcggguA.....      | 6    | 1 | 111 |
| .....cgggucgggaguuagcucaagcGfu.....        | 4    | 1 | 111 |
| .....cgggucgggaguuagcucaagcggguG.....      | 1    | 1 | 111 |
| .....cgggucgggaguuagcucaagcggguGa.....     | 1    | 1 | 111 |
| .....cgggucgggaguuagcucaagcggguu.....      | 3    | 0 | 111 |
| .....Ggggucgggaguuagcucaagcggguu.....      | 1    | 1 | 111 |
| .....cgggucgggaguuagcucaagcggguuU.....     | 7    | 1 | 111 |
| .....cgggucgggaguuagcucaagcggguAa.....     | 12   | 1 | 111 |
| .....cgggucgggaguuagcucaagcggguuA.....     | 2    | 1 | 111 |
| .....cgggucgggaguuagcucaagcggguuaccu.....  | 1    | 0 | 111 |
| .....cgggucgggaguuagcucaagcggguuaccuc..... | 1    | 0 | 111 |
| .....gggGcgggaguuagcucaagc.....            | 1    | 1 | 111 |
| .....gggucgggaguuagcucaagc.....            | 6    | 0 | 111 |
| .....Cggucgggaguuagcucaagc.....            | 1    | 1 | 111 |
| .....gggucgggaguuagcucaagcAg.....          | 1    | 1 | 111 |
| .....gggucgggaguuagcucaCgcgg.....          | 1    | 1 | 111 |
| .....gggucgggaguuagcucaagcgcG.....         | 1    | 1 | 111 |
| .....gggucgggaguuagcucaagcgg.....          | 42   | 0 | 111 |
| .....gggucgggaguuagcucaagcggA.....         | 3    | 1 | 111 |

cuaccgggucgggaguuagcucaagcgguuaccuccuacugcgggacuuucuaucuguccaucucugugcgggguuucgagaccgcgggugcuuacugaccuuuuuag

|                                                         |     |   |     |
|---------------------------------------------------------|-----|---|-----|
| .....gggucgggaguuagGuaagcgg.....                        | 1   | 1 | 111 |
| .....gggGcgggaguuagcucaagcgg.....                       | 1   | 1 | 111 |
| .....gggucUgaguuagcucaagcgg.....                        | 1   | 1 | 111 |
| .....gggucgggaguuagcucaagcggU.....                      | 2   | 1 | 111 |
| .....Cggucgggaguuagcucaagcgg.....                       | 2   | 1 | 111 |
| .....gggGcgggaguuagcucaagcgggu.....                     | 7   | 1 | 111 |
| .....gggucgggaguuagcucaagcλgu.....                      | 1   | 1 | 111 |
| .....gggucgggaguuagcucaagUgggu.....                     | 1   | 1 | 111 |
| .....gggCcgggaguuagcucaagcgggu.....                     | 3   | 1 | 111 |
| .....gggucgggagGuaagcucaagcgggu.....                    | 2   | 1 | 111 |
| .....gggucgggagCuaagcucaagcgggu.....                    | 1   | 1 | 111 |
| .....gggucgUaguuagcucaagcgggu.....                      | 3   | 1 | 111 |
| .....gggucgggaguuagcucaagcggG.....                      | 3   | 1 | 111 |
| .....gggucgggaguuCgcucaagcgggu.....                     | 3   | 1 | 111 |
| .....gggucgggaguCagcucaagcgggu.....                     | 2   | 1 | 111 |
| .....gggucgggaguuagcucaagcggC.....                      | 5   | 1 | 111 |
| .....gggucgggaguuagcucaCgcgggu.....                     | 2   | 1 | 111 |
| .....Uggucgggaguuagcucaagcgggu.....                     | 2   | 1 | 111 |
| .....gggucggGguuagcucaagcgggu.....                      | 2   | 1 | 111 |
| .....gggucgggaguuagcucCagcgggu.....                     | 8   | 1 | 111 |
| .....gggucggGguuagcucaagcgggu.....                      | 1   | 1 | 111 |
| .....gggucgggaguuagcucaaaCgggu.....                     | 1   | 1 | 111 |
| .....gggucgggaguuagcuUaagcgggu.....                     | 1   | 1 | 111 |
| .....gggucgggaguuGgcucaagcgggu.....                     | 1   | 1 | 111 |
| .....gggucgCaguuaagcucaagcgggu.....                     | 1   | 1 | 111 |
| .....gggucAgaguuagcucaagcgggu.....                      | 3   | 1 | 111 |
| .....gggucgggaguuagcucaaUcgggu.....                     | 3   | 1 | 111 |
| .....gggucgggaguuagcucaagcUgu.....                      | 1   | 1 | 111 |
| .....gggucgggaguuagcucaagcUgu.....                      | 1   | 1 | 111 |
| .....gggucgggaguuagcucaagcgggu.....                     | 296 | 0 | 111 |
| .....Cggucgggaguuagcucaagcgggu.....                     | 13  | 1 | 111 |
| .....gggGcgggaguuagcucaagcggguu.....                    | 1   | 1 | 111 |
| .....gggucgggaguuagcucaagcggguu.....                    | 29  | 0 | 111 |
| .....gggucgggaguCagcucaagcggguu.....                    | 1   | 1 | 111 |
| .....gggucgggaguuagcucaagcggguA.....                    | 1   | 1 | 111 |
| .....Cggucgggaguuagcucaagcggguu.....                    | 1   | 1 | 111 |
| .....gggucgggaguuagcucaagcggguC.....                    | 2   | 1 | 111 |
| .....gggucgggaguuCgcucaagcggguu.....                    | 1   | 1 | 111 |
| .....gggucgggaguuagcucaagcggguuC.....                   | 1   | 1 | 111 |
| .....gggucgggaguuagcucaagcggguuU.....                   | 2   | 1 | 111 |
| .....gggucgggaguuagcucaagcggguuac.....                  | 4   | 0 | 111 |
| .....gggucgggaguuagcucaagcggguGacc.....                 | 1   | 1 | 111 |
| .....gggucgggaguuagcucaagcggguuacc.....                 | 2   | 0 | 111 |
| .....gggucgggaguuagcucaagcggguuaccu.....                | 1   | 0 | 111 |
| .....gggucgggaguuagcucaagcggguuaccuccuacugcgggacu.....  | 1   | 0 | 111 |
| .....gggucgggaguuagcucaagcggguuaccuccuacugcgggacuG..... | 1   | 1 | 111 |
| .....ggucgggaguuagcucaagcgg.....                        | 1   | 0 | 111 |
| .....ggucgggaguuagcucaagcgggu.....                      | 1   | 0 | 111 |
| .....gucgggaguuagcucaaUcgggu.....                       | 1   | 1 | 111 |
| .....gucgggaguuagcucaagcgggu.....                       | 1   | 0 | 111 |
| .....ucgggaguuagcucaagcgg.....                          | 3   | 0 | 111 |
| .....ucgggaguuagcucCagcgggu.....                        | 1   | 1 | 111 |
| .....ucgUaguuagcucaagcgggu.....                         | 1   | 1 | 111 |
| .....ucgggaguuagcucaagcgggu.....                        | 5   | 0 | 111 |
| .....ucgggaguuagcucaagcggguuac.....                     | 1   | 0 | 111 |
| .....cgggaguuagcucaagcgg.....                           | 4   | 0 | 111 |
| .....cgggaguuagcucaagcgggu.....                         | 15  | 0 | 111 |
| .....cgggaguuagcucaagUgggu.....                         | 1   | 1 | 111 |
| .....cgggaguuagcucaagλgggu.....                         | 1   | 1 | 111 |
| .....ggagCuagcucaagcgggu.....                           | 1   | 1 | 111 |
| .....ggagGuaagcucaagcgggu.....                          | 1   | 1 | 111 |
| .....ggaguuagcucaagcgggu.....                           | 4   | 0 | 111 |
| .....ggGguuagcucaagcgggu.....                           | 1   | 1 | 111 |
| .....ggaguuagcucaagcggguλa.....                         | 1   | 1 | 111 |
| .....gcucaagcggguuaccuccuacugcgggacu.....               | 1   | 0 | 111 |
| .....gcucaagcggguuUuccuccuacugcgggacuuucuauc.....       | 1   | 1 | 111 |
| .....caagcggguuaccuccu.....                             | 2   | 0 | 111 |
| .....guuaccuccuacugcgggacuuucuaucgu.....                | 1   | 0 | 111 |

cuaccgggucggaguuagcucaagcgguuaccuccuauugcgggacuuucuaucuguccaucucugucgggguucgagaccgcggggucuuacugaccuuuuuag

|                                                 |    |   |     |
|-------------------------------------------------|----|---|-----|
| .....uaccuccuauugcggacuuucu.....                | 1  | 0 | l11 |
| .....uaccuccuauugcggacuuucuaucuguccaucucug..... | 1  | 0 | l11 |
| .....accuccuauugcggacuuucuaCug.....             | 1  | 1 | l11 |
| .....ucaugcggacuuucuCu.....                     | 1  | 1 | l11 |
| .....ucaugcggacuuucuaucuguccaucucuguc.....      | 1  | 0 | l11 |
| .....caugcggacuuucuaucuguccaucucugug.....       | 1  | 0 | l11 |
| .....gccggacuuucuaucuguccaucucugug.....         | 1  | 0 | l11 |
| .....uucuaucuguccaucucu.....                    | 1  | 0 | l11 |
| .....uauucuguccaucucugucg.....                  | 1  | 0 | l11 |
| .....aucuguccaucucugucgggguucgaga.....          | 1  | 0 | l11 |
| .....ucuguccaucucugucgggguucgagaccgcggguc.....  | 1  | 0 | l11 |
| .....ucucugucgggguucgagacc.....                 | 1  | 0 | l11 |
| .....ucugucgggguucgagacc.....                   | 1  | 0 | l11 |
| .....ucugucgggguucgagacc.....                   | 1  | 0 | l11 |
| .....ugugcgggguucgagacc.....                    | 1  | 0 | l11 |
| .....uucgagaccgcgggGgcuuac.....                 | 1  | 1 | l11 |
| .....uucgagaccgcgggucuuacugaccuuu.....          | 1  | 0 | l11 |
| .....uucgagaccgcgggucuuacugaccuuuu.....         | 1  | 0 | l11 |
| .....ucgagaccgcgggucuuacugaccuuuu.....          | 1  | 0 | l11 |
| .....cgcggggucuuacugacc.....                    | 8  | 0 | l11 |
| .....cgcggggucuuacugacc.....                    | 1  | 1 | l11 |
| .....cgcggggucuuacugaccuuA.....                 | 1  | 1 | l11 |
| .....cgcggggucuuacugaccuuG.....                 | 2  | 1 | l11 |
| .....cgcggggucuuacugaccuuu.....                 | 21 | 0 | l11 |
| .....cgcgggGcguuacugaccuuu.....                 | 1  | 1 | l11 |
| .....cgcgggUgcuuacugaccuuu.....                 | 1  | 1 | l11 |
| .....cgcggggucuuacugaccuuA.....                 | 4  | 1 | l11 |
| .....accgggGcggaguuagcucaa.....                 | 1  | 1 | k13 |
| .....cgggucggaguuagcucaag.....                  | 1  | 0 | k13 |
| .....cggUucggaguuagcucaagcgg.....               | 1  | 1 | k13 |
| .....cgggucggaguuagcucaagcgg.....               | 4  | 0 | k13 |
| .....cgggucggaguuagcucaagcggA.....              | 1  | 1 | k13 |
| .....cgggucggaguuagcucaagcggg.....              | 4  | 0 | k13 |
| .....cgggucggaguuagcucaagcggg.....              | 1  | 1 | k13 |
| .....gggGcggaguuagcucaagcgg.....                | 1  | 1 | k13 |
| .....gggucggaguuagcucaagcgg.....                | 1  | 0 | k13 |
| .....gggucggaguuagcucaagcggg.....               | 4  | 0 | k13 |
| .....gggucggaguuagcucaagcggA.....               | 1  | 1 | k13 |
| .....gggucggaguuagcucCagcgguu.....              | 1  | 1 | k13 |
| .....gggucggaguuagcucaagcgguu.....              | 3  | 0 | k13 |
| .....cgcggggucuuacugaccu.....                   | 1  | 0 | k13 |
| .....cgcggggucuuacCgaccuu.....                  | 2  | 1 | k13 |
| .....cgcggggucuuacugaccuu.....                  | 1  | 0 | k13 |
| .....cgcggggucuuacugaccuuu.....                 | 3  | 0 | k13 |
| .....accgggucggaguuagcucaagcggg.....            | 1  | 0 | j20 |
| .....Accgggucggaguuagcucaagcgg.....             | 1  | 1 | j20 |
| .....Accgggucggaguuagcucaagcgg.....             | 2  | 1 | j20 |
| .....ccGgggucggaguuagcucaagcggg.....            | 1  | 1 | j20 |
| .....Uccgggucggaguuagcucaagcggg.....            | 1  | 1 | j20 |
| .....Accgggucggaguuagcucaagcggg.....            | 5  | 1 | j20 |
| .....cccgggucggaguuagcucaagcggg.....            | 4  | 0 | j20 |
| .....Accgggucggaguuagcucaagcgguu.....           | 4  | 1 | j20 |
| .....ccgggucggaguuagcucaagA.....                | 1  | 1 | j20 |
| .....ccgggucggaguuagUucaagc.....                | 1  | 1 | j20 |
| .....ccgggucggaguuagcucaagcgg.....              | 7  | 0 | j20 |
| .....ccgggucggaguuagcucaagcUg.....              | 1  | 1 | j20 |
| .....ccgggucggaguuagcucaacCcg.....              | 1  | 1 | j20 |
| .....Ucgggucggaguuagcucaagcgg.....              | 1  | 1 | j20 |
| .....ccgggucggaguuagcucaagcgg.....              | 1  | 1 | j20 |
| .....ccgggucggaguuagcucCagcgg.....              | 2  | 1 | j20 |
| .....ccgggucggaguuagcucaagcgg.....              | 21 | 0 | j20 |
| .....ccgggucggaguuagcucaagcggA.....             | 1  | 1 | j20 |
| .....ccgggucggaguuagcCcaagcgg.....              | 1  | 1 | j20 |
| .....ccgggucggaguuagcucaagcggG.....             | 2  | 1 | j20 |
| .....ccgggucggaguuagcucaagcggA.....             | 2  | 1 | j20 |
| .....ccgggucggaguuagcucCagcgg.....              | 1  | 1 | j20 |
| .....ccgggucggaguuagcucaagcgg.....              | 1  | 1 | j20 |
| .....ccgggucggaguuagcucaagcgg.....              | 1  | 1 | j20 |

cuaccgggucgggaguuagcucaagcgguuaccucucuaugcggacuuucuaucuguccaucucugucgggguuucgagaccgcgggugcuuacugaccuuuuuag

|                                       |      |   |     |
|---------------------------------------|------|---|-----|
| ...cGgggucgggaguuagcucaagcgggu.....   | 1    | 1 | j20 |
| ...ccgggucgggaguuagcucaagcggC.....    | 2    | 1 | j20 |
| ...ccgggucgggagAuaagcucaagcgggu.....  | 1    | 1 | j20 |
| ...ccgggucgggaguuAaCcucaagcgggu.....  | 1    | 1 | j20 |
| ...ccgggGcgggaguuagcucaagcgggu.....   | 2    | 1 | j20 |
| ...cUgggucgggaguuagcucaagcgggu.....   | 2    | 1 | j20 |
| ...ccggCucgggaguuagcucaagcgggu.....   | 1    | 1 | j20 |
| ...ccgggucgggaguuagcucaagcgggu.....   | 63   | 0 | j20 |
| ...Ucgggucgggaguuagcucaagcgggu.....   | 1    | 1 | j20 |
| ...ccgggucgggaguuAUCucaagcgggu.....   | 1    | 1 | j20 |
| ...ccgggGcgggaguuagcucaagcgggu.....   | 1    | 1 | j20 |
| ...ccgggucgggagCuagcucaagcgggu.....   | 1    | 1 | j20 |
| ...ccgggucgggaguuagcucaagcgggu.....   | 14   | 0 | j20 |
| ...ccgggucgggaguuagcucaagcggCu.....   | 1    | 1 | j20 |
| ...ccgggucgggaguuagcucaagcCguu.....   | 1    | 1 | j20 |
| ...ccgggucgggaguuagcucaagcggguA.....  | 1    | 1 | j20 |
| ...ccgggucgggaguuagcGcaagcgggu.....   | 1    | 1 | j20 |
| ...ccgggucgggaguuagcucaagcggguU.....  | 2    | 1 | j20 |
| ...ccgggucgggaguuagcucaagcggguAa..... | 1    | 1 | j20 |
| ...cgggucgggaguuagcucaag.....         | 10   | 0 | j20 |
| ...cgggucgCaguuaagcucaag.....         | 1    | 1 | j20 |
| ...cgggAcgggaguuagcucaagc.....        | 1    | 1 | j20 |
| ...cgggucgggaguuagcucaagc.....        | 16   | 0 | j20 |
| ...cgggucgggaguuagcucaaUc.....        | 1    | 1 | j20 |
| ...cgggucCgaguuagcucaagc.....         | 1    | 1 | j20 |
| ...cgggucgggaguuagcucaagcA.....       | 5    | 1 | j20 |
| ...cgggCcgggaguuagcucaagc.....        | 1    | 1 | j20 |
| ...cgggGcgggaguuagcucaagc.....        | 5    | 1 | j20 |
| ...cgggucgggaguuagcucaagc.....        | 98   | 0 | j20 |
| ...cgggucgggaguuagcucaaUcg.....       | 2    | 1 | j20 |
| ...cgggucgggagGuaagcucaagc.....       | 3    | 1 | j20 |
| ...cgggucgggaguuagGuaagc.....         | 1    | 1 | j20 |
| ...cgggucgggaguuCgcucaagc.....        | 1    | 1 | j20 |
| ...cgggAcgggaguuagcucaagc.....        | 1    | 1 | j20 |
| ...cUggucgggaguuagcucaagc.....        | 1    | 1 | j20 |
| ...Ugggucgggaguuagcucaagc.....        | 3    | 1 | j20 |
| ...cgggucgggaguuagLucaagc.....        | 2    | 1 | j20 |
| ...cgggucgggaguuagcGcaagc.....        | 2    | 1 | j20 |
| ...cgggucgggaguuAaLcucaagc.....       | 1    | 1 | j20 |
| ...cgggucgggaguuCgcucaagc.....        | 2    | 1 | j20 |
| ...cgggucgggagGuaagcucaagc.....       | 28   | 1 | j20 |
| ...cgggucgggaguuagcucaagcGU.....      | 9    | 1 | j20 |
| ...cGggucgggaguuagcucaagc.....        | 4    | 1 | j20 |
| ...cgggucgggaguuagcuUaagc.....        | 4    | 1 | j20 |
| ...cgggucgggaguuagcucaagUgg.....      | 1    | 1 | j20 |
| ...cggCucgggaguuagcucaagc.....        | 2    | 1 | j20 |
| ...cgggucgggaguuagcucaaAac.....       | 1    | 1 | j20 |
| ...cgggucgggaguuagcuUgc.....          | 1    | 1 | j20 |
| ...cggAucgggaguuagcucaagc.....        | 3    | 1 | j20 |
| ...cgggucgggAuuagcucaagc.....         | 1    | 1 | j20 |
| ...cgggucgggaguuagcucaagcCg.....      | 2    | 1 | j20 |
| ...cgggucgggaguuagcucaagc.....        | 1438 | 0 | j20 |
| ...cggguAaggaguuagcucaagc.....        | 1    | 1 | j20 |
| ...cgggucgggaguuagcucaaCcg.....       | 10   | 1 | j20 |
| ...cgggucgggaguuagcucaaUcgg.....      | 15   | 1 | j20 |
| ...Ggggucgggaguuagcucaagc.....        | 4    | 1 | j20 |
| ...cgggucgggagGagcucaagc.....         | 1    | 1 | j20 |
| ...cgggucgggaguuGgcucaagc.....        | 1    | 1 | j20 |
| ...cgggucgggaguuagcuCaagc.....        | 13   | 1 | j20 |
| ...cggguGgggaguuagcucaagc.....        | 1    | 1 | j20 |
| ...cgggucgggaguuagcucaagGgg.....      | 1    | 1 | j20 |
| ...cggguUgggaguuagcucaagc.....        | 2    | 1 | j20 |
| ...cgggucgggagCuagcucaagc.....        | 3    | 1 | j20 |
| ...cgggucgggagAuaagcucaagc.....       | 1    | 1 | j20 |
| ...cgggucgggaguuagGuaagc.....         | 3    | 1 | j20 |
| ...cgCucgggaguuagcucaagc.....         | 3    | 1 | j20 |
| ...cggUucgggaguuagcucaagc.....        | 4    | 1 | j20 |
| ...cAggucgggaguuagcucaagc.....        | 2    | 1 | j20 |
| ...cgggucgggaguuagcucaagAag.....      | 4    | 1 | j20 |

cuaccgggucgggaguuagcucaagcgguuaccuccuacugcgggacuuucuaucuguccaucucugugcgggguuucgagaccgcggggugcuuacugaccuuuuuag

|                                       |      |   |     |
|---------------------------------------|------|---|-----|
| .....cgggucgggaguuagcucaagcga.....    | 12   | 1 | j20 |
| .....Ugggucgggaguuagcucaagcgg.....    | 9    | 1 | j20 |
| .....cgggGcgggaguuagcucaagcgg.....    | 54   | 1 | j20 |
| .....cgggucgggagCuagcucaagcgg.....    | 8    | 1 | j20 |
| .....cgggucgggaguuUcucuaagcgg.....    | 2    | 1 | j20 |
| .....cgggucgggaguuagcucaagcgc.....    | 6    | 1 | j20 |
| .....cgggAcgggaguuagcucaagcgg.....    | 10   | 1 | j20 |
| .....cUgggucgggaguuagcucaagcgg.....   | 5    | 1 | j20 |
| .....cgggucgggaguuagcCcaagcgg.....    | 4    | 1 | j20 |
| .....cgggucgCaguuagcucaagcgg.....     | 2    | 1 | j20 |
| .....cgggCcgaguuagcucaagcgg.....      | 8    | 1 | j20 |
| .....cgggucgggaguuUgcuaagcgg.....     | 1    | 1 | j20 |
| .....cgggucgggaguuagcucCagcgg.....    | 5    | 1 | j20 |
| .....Agggucgggaguuagcucaagcgg.....    | 5    | 1 | j20 |
| .....cgggucgUaguuagcucaagcgg.....     | 4    | 1 | j20 |
| .....cgggucgggaguuagcuAaagcgg.....    | 4    | 1 | j20 |
| .....cgggucgggaguuagcAcaagcgg.....    | 2    | 1 | j20 |
| .....cgggucgggGuuagcucaagcgg.....     | 1    | 1 | j20 |
| .....cgggucgggaguuagUucaagcgg.....    | 5    | 1 | j20 |
| .....cgggucgggaguuagcuGaagcgg.....    | 3    | 1 | j20 |
| .....cgggucgAaguuagcucaagcgg.....     | 1    | 1 | j20 |
| .....cgggucgggCuuagcucaagcgg.....     | 7    | 1 | j20 |
| .....cgggucgggAuuagcucaagcgg.....     | 1    | 1 | j20 |
| .....cgggucgggaguuagcucaagcggC.....   | 45   | 1 | j20 |
| .....cgggucAaguuagcucaagcgggu.....    | 3    | 1 | j20 |
| .....cgggucgggaguuagAuaagcgggu.....   | 4    | 1 | j20 |
| .....cgggucgUaguuagcucaagcgggu.....   | 10   | 1 | j20 |
| .....cgggAcgggaguuagcucaagcgggu.....  | 9    | 1 | j20 |
| .....cAggucgggaguuagcucaagcgggu.....  | 4    | 1 | j20 |
| .....cgggucgggaguuagcucaagGgggu.....  | 1    | 1 | j20 |
| .....cgggucgggaguuUgcuaagcgggu.....   | 1    | 1 | j20 |
| .....cggAucgggaguuagcucaagcgggu.....  | 1    | 1 | j20 |
| .....cgggucgggaguuUcucuaagcgggu.....  | 2    | 1 | j20 |
| .....cgggucgggaguuagcucaGgcgggu.....  | 2    | 1 | j20 |
| .....cgggucgggaguuagcucaagAggu.....   | 3    | 1 | j20 |
| .....cggUucgggaguuagcucaagcgggu.....  | 5    | 1 | j20 |
| .....cgggucgggaguuagGuaagcgggu.....   | 3    | 1 | j20 |
| .....cgggucgggUuuagcucaagcgggu.....   | 1    | 1 | j20 |
| .....cgggucgggagAuaagcucaagcgggu..... | 2    | 1 | j20 |
| .....cgggucgggaguuagcuGaagcgggu.....  | 1    | 1 | j20 |
| .....cgggucgggaguuCgcuaagcgggu.....   | 7    | 1 | j20 |
| .....Ugggucgggaguuagcucaagcgggu.....  | 14   | 1 | j20 |
| .....cgggucgggaguuagcuUaagcgggu.....  | 7    | 1 | j20 |
| .....cgUucgggaguuagcucaagcgggu.....   | 1    | 1 | j20 |
| .....cgggucgggaguuagcucaagcgggu.....  | 2894 | 0 | j20 |
| .....cgggGcgggaguuagcucaagcgggu.....  | 133  | 1 | j20 |
| .....cgggucgggAuuagcucaagcgggu.....   | 1    | 1 | j20 |
| .....cgggucgCaguuagcucaagcgggu.....   | 4    | 1 | j20 |
| .....cgggucgggCuuagcucaagcgggu.....   | 8    | 1 | j20 |
| .....cgggucgggaguuagUucaagcgggu.....  | 3    | 1 | j20 |
| .....cgggCcgggaguuagcucaagcgggu.....  | 34   | 1 | j20 |
| .....cgggucgggAuuagcucaagcgggu.....   | 7    | 1 | j20 |
| .....cgggucgggagUagcucaagcgggu.....   | 1    | 1 | j20 |
| .....cggguUgggaguuagcucaagcgggu.....  | 6    | 1 | j20 |
| .....cgggucgggaguuagcucaagUgggu.....  | 3    | 1 | j20 |
| .....cgggucgggaguuagcucaagcggG.....   | 29   | 1 | j20 |
| .....cgggucgggagUagcucaagcgggu.....   | 33   | 1 | j20 |
| .....cggguGgggaguuagcucaagcgggu.....  | 3    | 1 | j20 |
| .....cgggucgggaguuagcucaagcgcU.....   | 1    | 1 | j20 |
| .....cgggucgggaguuagcucUagcgggu.....  | 2    | 1 | j20 |
| .....cgggucgggaguuagcucaagcggA.....   | 63   | 1 | j20 |
| .....cgggucgggaguuagcucaagcCgu.....   | 3    | 1 | j20 |
| .....Ggggucgggaguuagcucaagcgggu.....  | 13   | 1 | j20 |
| .....Agggucgggaguuagcucaagcgggu.....  | 12   | 1 | j20 |
| .....cgggucgggaguuagcAcaagcgggu.....  | 2    | 1 | j20 |
| .....cgggucgggaguuagcucGagcgggu.....  | 3    | 1 | j20 |
| .....cgggucgggaguuagcuAaagcgggu.....  | 11   | 1 | j20 |
| .....cgggucgggagCuagcucaagcgggu.....  | 10   | 1 | j20 |
| .....cgggucgggagUagcucaagcgggu.....   | 9    | 1 | j20 |

cuaccgggucgggaguuagcucaagcgguuaccuccuacugcgggacuuucuaucuguccaucucugugcgggguuucgagaccgcgggugcuuacugaccuuuuuug

|                                        |     |   |     |
|----------------------------------------|-----|---|-----|
| .....cgggucgggaguuagcucaagcggUu.....   | 5   | 1 | j20 |
| .....cgggucUgaguuagcucaagcggU.....     | 1   | 1 | j20 |
| .....cCggucgggaguuagcucaagcggU.....    | 4   | 1 | j20 |
| .....cgggucgggaguuAAcucaagcggU.....    | 1   | 1 | j20 |
| .....cgggucgggaguuagcucaaCcggu.....    | 6   | 1 | j20 |
| .....cgggucgggaguuagcucaUgcggU.....    | 7   | 1 | j20 |
| .....cgggucCgaguuagcucaagcggU.....     | 3   | 1 | j20 |
| .....cgggucgggaguuUgcuaagcggU.....     | 1   | 1 | j20 |
| .....cgCgucgggaguuagcucaagcggU.....    | 4   | 1 | j20 |
| .....cggguAaggaguuagcucaagcggU.....    | 3   | 1 | j20 |
| .....cgggucgggaguuagcCcaagcggU.....    | 5   | 1 | j20 |
| .....cgggucgggaguuagcCcaagcggU.....    | 6   | 1 | j20 |
| .....cgggucgggaguuagcucaaUcggu.....    | 25  | 1 | j20 |
| .....cgggucgggaguuagcucaCgcggu.....    | 21  | 1 | j20 |
| .....cgggucgggaguuagcucCagcggU.....    | 17  | 1 | j20 |
| .....cUggucgggaguuagcucaagcggU.....    | 6   | 1 | j20 |
| .....cggCucgggaguuagcucaagcggU.....    | 4   | 1 | j20 |
| .....cgggucgggaguuagcucaaAcggu.....    | 1   | 1 | j20 |
| .....cgggucggGguuagcucaagcggU.....     | 1   | 1 | j20 |
| .....cgggucgggaguuA CcucaagcggU.....   | 5   | 1 | j20 |
| .....cgggucgggaguuagcucaagcUgu.....    | 1   | 1 | j20 |
| .....Ugggucgggaguuagcucaagcgguu.....   | 4   | 1 | j20 |
| .....cgggucgggaguuagcucCagcgguu.....   | 2   | 1 | j20 |
| .....cgggucgggaguuagcCcaagcgguu.....   | 2   | 1 | j20 |
| .....cgCgucgggaguuagcucaagcgguu.....   | 1   | 1 | j20 |
| .....cgggucgggaguuagcuUaagcgguu.....   | 2   | 1 | j20 |
| .....cUggucgggaguuagcucaagcgguu.....   | 2   | 1 | j20 |
| .....cgggucgggaguuagcucaagcggUu.....   | 2   | 1 | j20 |
| .....cgUgucgggaguuagcucaagcgguu.....   | 1   | 1 | j20 |
| .....Ggggucgggaguuagcucaagcgguu.....   | 5   | 1 | j20 |
| .....cCggucgggaguuagcucaagcgguu.....   | 2   | 1 | j20 |
| .....cgggucgggaguuagcucaagcgguu.....   | 535 | 0 | j20 |
| .....cgggucgggagUGagcucaagcgguu.....   | 1   | 1 | j20 |
| .....cgggucgggaguuagcucaCgcggu.....    | 6   | 1 | j20 |
| .....cgggGcgggaguuagcucaagcgguu.....   | 12  | 1 | j20 |
| .....cgggucgggaguuagcucaagcggUuu.....  | 2   | 1 | j20 |
| .....cggCucgggaguuagcucaagcgguu.....   | 1   | 1 | j20 |
| .....cgggucgggaguuagcucaaCcggu.....    | 2   | 1 | j20 |
| .....cgggucgggaguuagUucaagcgguu.....   | 1   | 1 | j20 |
| .....cgggucgggaguuA Ccucaagcgguu.....  | 2   | 1 | j20 |
| .....cgggucgggaguuagcucaagcggUa.....   | 127 | 1 | j20 |
| .....cgggucgUaguuagcucaagcgguu.....    | 1   | 1 | j20 |
| .....cgggucgggaguuagcucaagcggUu.....   | 7   | 1 | j20 |
| .....cgggucgggaguuagcucaagcggCu.....   | 12  | 1 | j20 |
| .....cgggucgggaguuagcucaagcggUG.....   | 7   | 1 | j20 |
| .....cgggucggGguuagcucaagcgguu.....    | 1   | 1 | j20 |
| .....cgggucgggaguuagcucaagcggUgu.....  | 1   | 1 | j20 |
| .....cgggucgggaguuagcucaagcggUC.....   | 4   | 1 | j20 |
| .....cgggucgggagGuaagcucaagcgguu.....  | 9   | 1 | j20 |
| .....cgggCcgaguuagcucaagcgguu.....     | 9   | 1 | j20 |
| .....cgggucgggagCuagcucaagcgguu.....   | 2   | 1 | j20 |
| .....cgggucgggaguuagcucaUgcgguu.....   | 1   | 1 | j20 |
| .....cgggucCgaguuagcucaagcgguu.....    | 2   | 1 | j20 |
| .....cggguUgggaguuagcucaagcgguu.....   | 1   | 1 | j20 |
| .....cgggucgggaguuagcuUaagcgguu.....   | 1   | 1 | j20 |
| .....cgggucgggaguuagcucaagcggCu.....   | 2   | 1 | j20 |
| .....cgggucgUaguuagcucaagcgguu.....    | 2   | 1 | j20 |
| .....cgggucgggaguuAUcucaagcgguu.....   | 1   | 1 | j20 |
| .....cgggucggaCuagcucaagcgguu.....     | 3   | 1 | j20 |
| .....cgggucgggaguuagcucaagcCGuu.....   | 1   | 1 | j20 |
| .....cgggucCgaguuagcucaagcgguuu.....   | 1   | 1 | j20 |
| .....cgggucgggaguuagcucaagcgguuu.....  | 7   | 0 | j20 |
| .....cgggucgggaguuagcucaagcggUa.....   | 159 | 1 | j20 |
| .....cgggucgggaguuagcucaagcggUca.....  | 1   | 1 | j20 |
| .....cgggucgggaguuagcucaagcggUuU.....  | 55  | 1 | j20 |
| .....cgggucgggaguuagcucaagcgguuuA..... | 9   | 1 | j20 |
| .....gggucgggaguuagcucaag.....         | 2   | 0 | j20 |
| .....gggucgggaguuagcuUaagcgg.....      | 1   | 1 | j20 |
| .....gggucgggaguuagcucaagcg.....       | 4   | 0 | j20 |

cuaccgggucgggaguuagcucaagcgguuaccuccuacugcggacuuucuaucuguccaucucugugcgggguuucgagaccgcgggugcuuacugaccuuuuuag

|                                       |      |   |     |
|---------------------------------------|------|---|-----|
| .....gggucgggaguuagcGcaagcg.....      | 1    | 1 | j20 |
| .....gggucgggaguuagcucaacCgg.....     | 3    | 1 | j20 |
| .....gggCcgaguuagcucaagcgg.....       | 4    | 1 | j20 |
| .....gggucgggaguuagcucaagcG.....      | 2    | 1 | j20 |
| .....gggGcggaguuagcucaagcgg.....      | 5    | 1 | j20 |
| .....gggucgggaguuagcuUaaagcgg.....    | 1    | 1 | j20 |
| .....gggucgggaguuagcucCagcgg.....     | 4    | 1 | j20 |
| .....Cggucgggaguuagcucaagcgg.....     | 2    | 1 | j20 |
| .....gggAcgggaguuagcucaagcgg.....     | 1    | 1 | j20 |
| .....gggucgggagCuagcucaagcgg.....     | 2    | 1 | j20 |
| .....gggucgggagGuaagcucaagcgg.....    | 1    | 1 | j20 |
| .....gggucgggaguuagcuUaaagcgg.....    | 1    | 1 | j20 |
| .....gggucgggaguuagcucGagcgg.....     | 1    | 1 | j20 |
| .....gggucgggaguuagcucaagUgg.....     | 1    | 1 | j20 |
| .....gggucgggaguuagcucaagcUg.....     | 1    | 1 | j20 |
| .....gggucgggaguuagcucaaUcgg.....     | 1    | 1 | j20 |
| .....gggucgggaguuagcucaagcgg.....     | 124  | 0 | j20 |
| .....gggucgggaguuAacuaagcgg.....      | 3    | 1 | j20 |
| .....gggCcgaguuagcucaagcgg.....       | 24   | 1 | j20 |
| .....gggucgggaguuagcucaCgcgg.....     | 1    | 1 | j20 |
| .....gggucgCaguuagcucaagcgg.....      | 8    | 1 | j20 |
| .....Uggucgggaguuagcucaagcgg.....     | 3    | 1 | j20 |
| .....gggucgggaguuagGuaagcgg.....      | 1    | 1 | j20 |
| .....gggucgggaguuagcucaagcggC.....    | 22   | 1 | j20 |
| .....gggucgggaguuagcuUaaagcgg.....    | 1    | 1 | j20 |
| .....gggUgggaguuagcucaagcgg.....      | 3    | 1 | j20 |
| .....gggucgggaguuagcucUagcgg.....     | 1    | 1 | j20 |
| .....gggucgggagAuaagcucaagcgg.....    | 4    | 1 | j20 |
| .....ggCucgggaguuagcucaagcgg.....     | 3    | 1 | j20 |
| .....gggucgggaguuagcucaagGgg.....     | 2    | 1 | j20 |
| .....gggucggaCuagcucaagcgg.....       | 2    | 1 | j20 |
| .....gggucAagaguuagcucaagcgg.....     | 1    | 1 | j20 |
| .....gggucgggaguuagcCaaagcgg.....     | 5    | 1 | j20 |
| .....gggGcggaguuagcucaagcgg.....      | 91   | 1 | j20 |
| .....gggucggUguagcucaagcgg.....       | 1    | 1 | j20 |
| .....gggucgggaguuagcucaagAgg.....     | 2    | 1 | j20 |
| .....gggucgggaguuagUuaagcgg.....      | 6    | 1 | j20 |
| .....gggucgggagCuagcucaagcgg.....     | 9    | 1 | j20 |
| .....gggucgggaguuagcuUaaagcgg.....    | 5    | 1 | j20 |
| .....gggucgggaguuagcucaagcggA.....    | 11   | 1 | j20 |
| .....gggucgggaguuagcucaagcgg.....     | 14   | 1 | j20 |
| .....gggucgggaguuagcucaagcgg.....     | 1313 | 0 | j20 |
| .....gggucUgaguuagcucaagcgg.....      | 2    | 1 | j20 |
| .....gggucgggaguuagcGcaagcgg.....     | 8    | 1 | j20 |
| .....gggucgggaguuagcucaagcUg.....     | 3    | 1 | j20 |
| .....gggucgggaguuCgcuaagcgg.....      | 2    | 1 | j20 |
| .....gUgucgggaguuagcucaagcgg.....     | 8    | 1 | j20 |
| .....gggucgggaguuagcucaagcGlu.....    | 1    | 1 | j20 |
| .....gggucgggaguuUcucaagcgg.....      | 2    | 1 | j20 |
| .....gggucgggaguuagcAcaagcgg.....     | 3    | 1 | j20 |
| .....gggucgggaguuagcGagcucaagcgg..... | 5    | 1 | j20 |
| .....gggucgggaguuagcucCagcgg.....     | 12   | 1 | j20 |
| .....gggucgggAuuagcucaagcgg.....      | 4    | 1 | j20 |
| .....gggucggGuuagcucaagcgg.....       | 3    | 1 | j20 |
| .....gggucggGuuagcucaagcgg.....       | 4    | 1 | j20 |
| .....gggucgggaguuagcucaagcggG.....    | 20   | 1 | j20 |
| .....gggucgggaguuagcucGagcgg.....     | 1    | 1 | j20 |
| .....gggucgggaguuaglucaagcgg.....     | 5    | 1 | j20 |
| .....Cggucgggaguuagcucaagcgg.....     | 5    | 1 | j20 |
| .....gggucgggAuuagcucaagcgg.....      | 1    | 1 | j20 |
| .....gggucgggaguuagcuGaaagcgg.....    | 1    | 1 | j20 |
| .....gggucgggaguuCagcucaagcgg.....    | 6    | 1 | j20 |
| .....gggucgAaguuagcucaagcgg.....      | 1    | 1 | j20 |
| .....gggucgggaguuagcucaagUgg.....     | 3    | 1 | j20 |
| .....gggucgggaguuagcucaagcGU.....     | 3    | 1 | j20 |
| .....gggAcgggaguuagcucaagcgg.....     | 9    | 1 | j20 |
| .....ggguAaggaguuagcucaagcgg.....     | 3    | 1 | j20 |
| .....gggucgggaguuagcucaagcGgu.....    | 2    | 1 | j20 |
| .....ggguGggaguuagcucaagcgg.....      | 2    | 1 | j20 |

cuaccgggucgggaguuagcucaagcgguuaccuccuacugcggacuucuaucuguccaucucugucgggguuucgagaccgcgggucuuacugaccuuuuuag

|                                        |     |   |     |
|----------------------------------------|-----|---|-----|
| .....gggucgggaguuacCucaagcgggu.....    | 6   | 1 | j20 |
| .....gggucgggaguuagcucaGgcgggu.....    | 1   | 1 | j20 |
| .....gCgucgggaguuagcucaaaAcgggu.....   | 2   | 1 | j20 |
| .....gggucgggaguuagcucaaaAcgggu.....   | 2   | 1 | j20 |
| .....gggucgggaguuagcucaaaGcgCu.....    | 1   | 1 | j20 |
| .....gggucgggaguuagcucaaaUcggu.....    | 2   | 1 | j20 |
| .....gggucgggaguuagcucaaaCcggu.....    | 10  | 1 | j20 |
| .....gggucgggaguuagcucaaaGcgAu.....    | 2   | 1 | j20 |
| .....gggucgggaguuagcucaaaCcgguu.....   | 3   | 1 | j20 |
| .....gggucgggaguuagcucaaaCcgguu.....   | 2   | 1 | j20 |
| .....UggucgggaguuagcucaaaGcgguu.....   | 4   | 1 | j20 |
| .....gggucgggaguuagcucaaaGcgguu.....   | 4   | 1 | j20 |
| .....gggucgggaguuagcucaaaGcgguu.....   | 1   | 1 | j20 |
| .....ggguGggaguuagcucaaaGcgguu.....    | 2   | 1 | j20 |
| .....gggucgggaguuagAucaaaGcgguu.....   | 3   | 1 | j20 |
| .....gCgucgggaguuagcucaaaGcgguu.....   | 1   | 1 | j20 |
| .....gggucgggaguuacUcaaaGcgguu.....    | 2   | 1 | j20 |
| .....gggucgggaguuagcucaaaGAgguu.....   | 3   | 1 | j20 |
| .....AggucgggaguuagcucaaaGcgguu.....   | 1   | 1 | j20 |
| .....gggucgggaguuagcucaaaGcgguu.....   | 1   | 1 | j20 |
| .....gggucgggaguuagcucaaaGcAgguu.....  | 2   | 1 | j20 |
| .....gggucgggaguuagcucaaaGcgguu.....   | 7   | 1 | j20 |
| .....gggucgggaguuagcucaaaGcgguu.....   | 589 | 0 | j20 |
| .....gggucgggaguuagcucaaaGcgguG.....   | 1   | 1 | j20 |
| .....gggucgggaguuagcCcaaaGcgguu.....   | 2   | 1 | j20 |
| .....gggucgAaguuagcucaaaGcgguu.....    | 1   | 1 | j20 |
| .....gAagcgggaguuagcucaaaGcgguu.....   | 1   | 1 | j20 |
| .....gggucgggaguuagcucaaaGcCguu.....   | 1   | 1 | j20 |
| .....gggucgggaguuagcucaaaGcgguu.....   | 1   | 1 | j20 |
| .....gggucgUaguuagcucaaaGcgguu.....    | 1   | 1 | j20 |
| .....gggCcgaguuagcucaaaGcgguu.....     | 13  | 1 | j20 |
| .....gggucgggGguuagcucaaaGcgguu.....   | 1   | 1 | j20 |
| .....ggCucgggaguuagcucaaaGcgguu.....   | 1   | 1 | j20 |
| .....gggucgggaguuagcucaaaGcgguu.....   | 1   | 1 | j20 |
| .....gggucgggaguuagcGcaaaGcgguu.....   | 8   | 1 | j20 |
| .....gggucgggaguuagcuAaaGcgguu.....    | 2   | 1 | j20 |
| .....gggucgggaguuagcucaaaGcgGcu.....   | 10  | 1 | j20 |
| .....gggucgggaguuagcucaaaGcgguu.....   | 3   | 1 | j20 |
| .....gggucgggaguuagcucaaaUcgguu.....   | 5   | 1 | j20 |
| .....gggucgggaguuagcuUaaGcgguu.....    | 1   | 1 | j20 |
| .....gggucgggagCuagcucaaaGcgguu.....   | 10  | 1 | j20 |
| .....gggucgggaguuagcucaaaGcgguA.....   | 63  | 1 | j20 |
| .....gggucgggaguuagcucaaaGcgguC.....   | 2   | 1 | j20 |
| .....gggucgggaguuagcucaaaGcgGuu.....   | 1   | 1 | j20 |
| .....gggCcgaguuagcucaaaGcgguu.....     | 36  | 1 | j20 |
| .....gggucgggaguuagUcaaaGcgguu.....    | 3   | 1 | j20 |
| .....gggAcggaguuagcucaaaGcgguu.....    | 4   | 1 | j20 |
| .....gUgucgggaguuagcucaaaGcgguu.....   | 1   | 1 | j20 |
| .....gggucgggaguuagcucGagcggguu.....   | 1   | 1 | j20 |
| .....gggucgggaguuagcucaaaGcgGuu.....   | 9   | 1 | j20 |
| .....gggucgggaguuagcucaaaGcgguuC.....  | 2   | 1 | j20 |
| .....gggucgggaguuagcucaaaUcgguua.....  | 1   | 1 | j20 |
| .....gggucgggaguuagcucaaaGcgguuG.....  | 2   | 1 | j20 |
| .....gggucgggaguuagcucaaaGcgguuU.....  | 324 | 1 | j20 |
| .....gggucgggGguuagcucaaaGcgguua.....  | 1   | 1 | j20 |
| .....gggucgggaguuagcucaaaGcgguuAa..... | 89  | 1 | j20 |
| .....gggAcggaguuagcucaaaGcgguua.....   | 1   | 1 | j20 |
| .....gggucgggaguuagcucaaaGcgguua.....  | 1   | 1 | j20 |
| .....gggucgggaguuagcucaaaGcgguua.....  | 18  | 0 | j20 |
| .....gggucgggaguuagcucaaaGcgguuaA..... | 8   | 1 | j20 |
| .....ggucgggaguuagcucaaaGcggu.....     | 1   | 0 | j20 |
| .....ggucgggaguuagcucaaaGcgguu.....    | 1   | 0 | j20 |
| .....ggucgggaguuagcucaaaGcgguuAa.....  | 1   | 1 | j20 |
| .....ggucgggaguuagcucaaaGcgguuU.....   | 4   | 1 | j20 |
| .....ucgggaguuagcucaaaGcgg.....        | 1   | 0 | j20 |
| .....cggaguuagcucaaaGcgguu.....        | 2   | 0 | j20 |
| .....ggaguuagcucaaaGcgguu.....         | 6   | 0 | j20 |
| .....ggagUuagcucaaaGcgguu.....         | 1   | 1 | j20 |
| .....AaguuagcucaaaGcgguu.....          | 1   | 1 | j20 |



cuaccgggucggaguagcucaagcgguuaccuccucaugcggacuucuaucuguccaucucugcgggguuacgagaccgcggggucuuacugaccuuuaug

|                                   |      |   |     |
|-----------------------------------|------|---|-----|
| .....ggaguagcucaaUcgggu.....      | 1    | 1 | j20 |
| .....ggaguagcucaagcggA.....       | 1    | 1 | j20 |
| .....ggaguagcucaagcgguu.....      | 2    | 0 | j20 |
| .....uaccuccucaugcggacu.....      | 2    | 0 | j20 |
| .....uaccuccucaugcggacuuu.....    | 1    | 0 | j20 |
| .....uaccuccucaugcggacuuc.....    | 1    | 0 | j20 |
| .....accuccucaugcggacuuu.....     | 1    | 0 | j20 |
| .....cuccucaugcggacuuu.....       | 1    | 0 | j20 |
| .....cucaugcggacuucuu.....        | 1    | 0 | j20 |
| .....uuucuaucuguccaucucu.....     | 1    | 0 | j20 |
| .....aucucugucgggguuacgagacc..... | 1    | 0 | j20 |
| .....cugucgggguuacgaga.....       | 1    | 0 | j20 |
| .....gaccgcggggucuuacugaccuu..... | 1    | 0 | j20 |
| .....Acgcggggucuuacugaccuu.....   | 2    | 1 | j20 |
| .....cgcgggGcguuacugacc.....      | 2    | 1 | j20 |
| .....cgcgggGgcuuacugacc.....      | 1    | 1 | j20 |
| .....cgcgggGucuuacugacc.....      | 12   | 0 | j20 |
| .....cgcgggGcuuacugaccA.....      | 2    | 1 | j20 |
| .....cgcgggGucuuacugacc.....      | 7    | 0 | j20 |
| .....cgcgggGcuuacuUaccuu.....     | 1    | 1 | j20 |
| .....cgcgggGcuuCuugaccuu.....     | 1    | 1 | j20 |
| .....cgcgggGcuuacuAaccuu.....     | 1    | 1 | j20 |
| .....cgcgggGgcuuacugaccuu.....    | 2    | 1 | j20 |
| .....cgcgggGucGacugaccuu.....     | 1    | 1 | j20 |
| .....cgcgggGcuuUugaccuu.....      | 1    | 1 | j20 |
| .....AgcgggGucuuacugaccuu.....    | 1    | 1 | j20 |
| .....cgcgggGgcuuacugaccuu.....    | 2    | 1 | j20 |
| .....cgcgggGucuuacugCccuu.....    | 1    | 1 | j20 |
| .....cgcgggGucuuacugaccAuu.....   | 1    | 1 | j20 |
| .....cgcgggGucuuacugaccAuu.....   | 1    | 1 | j20 |
| .....cgcgggGucuuacuCaaccuu.....   | 1    | 1 | j20 |
| .....cgcgggGcuuacugaccUu.....     | 1    | 1 | j20 |
| .....cgcgggGcguuacugaccuu.....    | 6    | 1 | j20 |
| .....cgcgggGucuuacugaccGu.....    | 1    | 1 | j20 |
| .....cgcgggGucuuacugaccG.....     | 1    | 1 | j20 |
| .....cgcgggGucuuacugaccGcu.....   | 1    | 1 | j20 |
| .....cUcgggGucuuacugaccuu.....    | 1    | 1 | j20 |
| .....cgcgggGcuuacugaccuu.....     | 1    | 1 | j20 |
| .....cgcgggGucuuacugaccuu.....    | 103  | 0 | j20 |
| .....AgcgggGucuuacugaccuu.....    | 7    | 1 | j20 |
| .....cgcgggGucuuacugaccuuG.....   | 4    | 1 | j20 |
| .....cgcgggGucuuacugaGccuu.....   | 1    | 1 | j20 |
| .....cUcgggGucuuacugaccuu.....    | 2    | 1 | j20 |
| .....cgcgggGgcuuacugaccuu.....    | 35   | 1 | j20 |
| .....cgcgggGucuuacugCccuu.....    | 6    | 1 | j20 |
| .....cgcgggGucuuacugaccuu.....    | 1516 | 0 | j20 |
| .....cgcgggGucuuacuUaccuu.....    | 18   | 1 | j20 |
| .....cgcgggGucuuacugaccuuA.....   | 16   | 1 | j20 |
| .....GgcgggGucuuacugaccuu.....    | 1    | 1 | j20 |
| .....cgcgggGucGacugaccuu.....     | 11   | 1 | j20 |
| .....cgcgggGucuuacAgaccuu.....    | 1    | 1 | j20 |
| .....cgcgggGucuuacugaccuuC.....   | 5    | 1 | j20 |
| .....cgcgggGucCuacugaccuu.....    | 5    | 1 | j20 |
| .....cgcgggGucuuacugaccuu.....    | 7    | 1 | j20 |
| .....cgCgggGucuuacugaccuu.....    | 6    | 1 | j20 |
| .....cgcgggGucuuacugaccuu.....    | 7    | 1 | j20 |
| .....cgUgggGucuuacugaccuu.....    | 6    | 1 | j20 |
| .....cgcgggGucuuacugaccuu.....    | 8    | 1 | j20 |
| .....cgcgggGgcuuacugaccuu.....    | 20   | 1 | j20 |
| .....cgcgggGUuuuacugaccuu.....    | 8    | 1 | j20 |
| .....cgcgggGucuuacugaUccuu.....   | 3    | 1 | j20 |
| .....cgAgggGucuuacugaccuu.....    | 1    | 1 | j20 |
| .....cgcgggGucuuacugaAccuu.....   | 5    | 1 | j20 |
| .....cgcgggGucuuacuAaccuu.....    | 2    | 1 | j20 |
| .....cgcgggGucGuacugaccuu.....    | 1    | 1 | j20 |
| .....cgcgggGguuuacugaccuu.....    | 2    | 1 | j20 |
| .....cgcgggGucuuacugaccuu.....    | 13   | 1 | j20 |
| .....cgcgggGucuuUugaccuu.....     | 3    | 1 | j20 |
| .....cgcgggGUuuacugaccuu.....     | 5    | 1 | j20 |

cuaccgggucggaguuagcucaagcgguuaccuccuacugcggacuuucuaucuguccaucugugcgggguucgagaccgcggggucuuacugacccuuuaug

|                                    |     |   |     |
|------------------------------------|-----|---|-----|
| .....cgcggggucuuacugaccCu.....     | 4   | 1 | j20 |
| .....cgcggggucuuCugacccuu.....     | 5   | 1 | j20 |
| .....cgcggggucuuacuCaaccuu.....    | 2   | 1 | j20 |
| .....cgcggggucuuacCgacccuu.....    | 3   | 1 | j20 |
| .....cgcgUgugucuuacugacccuu.....   | 4   | 1 | j20 |
| .....cgcggggucuuacGgacccuu.....    | 5   | 1 | j20 |
| .....cCggggucuuacugacccuu.....     | 5   | 1 | j20 |
| .....cgcggggucuuAugacccuu.....     | 1   | 1 | j20 |
| .....cgcgUggugucuuacugacccuu.....  | 3   | 1 | j20 |
| .....cgcggggucuuacugacGcuu.....    | 1   | 1 | j20 |
| .....Ugcggggucuuacugacccuu.....    | 5   | 1 | j20 |
| .....cgcggggucuuacugaccUuu.....    | 11  | 1 | j20 |
| .....cgcgggUgucuuacugacccuu.....   | 1   | 1 | j20 |
| .....cgcggggucuuacugacUcuu.....    | 4   | 1 | j20 |
| .....cgcgggguAcuuacugacccuu.....   | 3   | 1 | j20 |
| .....cgcgCgugucuuacugacccuu.....   | 2   | 1 | j20 |
| .....cgcgggCugucuuacugacccuu.....  | 4   | 1 | j20 |
| .....cgcgggCgucuuacugacccuu.....   | 60  | 1 | j20 |
| .....cgcggggucuuacugaAccuuu.....   | 1   | 1 | j20 |
| .....cgcggggucuuacugaccGuuu.....   | 1   | 1 | j20 |
| .....cgcggggucuuacugaccUuuu.....   | 1   | 1 | j20 |
| .....cgcgggugcGuacugacccuuu.....   | 2   | 1 | j20 |
| .....cgcgAgugucuuacugacccuuu.....  | 1   | 1 | j20 |
| .....cgcggggucuuGcugacccuuu.....   | 1   | 1 | j20 |
| .....cgcggggucuuacuUaccuuu.....    | 2   | 1 | j20 |
| .....cgcggggucuuCugacccuuu.....    | 1   | 1 | j20 |
| .....cgcggggucuuacugaccAuuu.....   | 2   | 1 | j20 |
| .....cgcggggucuuacugacccuuC.....   | 1   | 1 | j20 |
| .....cgcggggucuuacugacccuuu.....   | 3   | 1 | j20 |
| .....cgcggggucuuacugacUcuuu.....   | 1   | 1 | j20 |
| .....cgcggggucuuacugacccuGu.....   | 3   | 1 | j20 |
| .....cgcggggucuuGacugacccuuu.....  | 4   | 1 | j20 |
| .....cgcggggucuuacugacccuuG.....   | 1   | 1 | j20 |
| .....cgcggggucuuAaugacccuuu.....   | 1   | 1 | j20 |
| .....cgcgggGgucuuacugacccuuu.....  | 10  | 1 | j20 |
| .....cgcgggguUcuuacugacccuuu.....  | 1   | 1 | j20 |
| .....cgcggggCgucuuacugacccuuu..... | 20  | 1 | j20 |
| .....cgcggggucuuacCgacccuuu.....   | 3   | 1 | j20 |
| .....cgGgggucuuacugacccuuu.....    | 1   | 1 | j20 |
| .....cgcgggugcuCacugacccuuu.....   | 2   | 1 | j20 |
| .....cgcgUggugucuuacugacccuuu..... | 1   | 1 | j20 |
| .....cgcggggucuuacugacccuuA.....   | 3   | 1 | j20 |
| .....Ugcggggucuuacugacccuuu.....   | 1   | 1 | j20 |
| .....cgcgUgugucuuacugacccuuu.....  | 1   | 1 | j20 |
| .....cgcggggucuuacugacccuuAu.....  | 1   | 1 | j20 |
| .....cgcggggucCuacugacccuuu.....   | 2   | 1 | j20 |
| .....cgcggggucuuacugaccCu.....     | 1   | 1 | j20 |
| .....cgcggggAgcuuacugacccuuu.....  | 10  | 1 | j20 |
| .....cgcggggucuuacugaccCu.....     | 3   | 1 | j20 |
| .....cAeggggucuuacugacccuuu.....   | 1   | 1 | j20 |
| .....cgcggggucuuacugaUccuuu.....   | 3   | 1 | j20 |
| .....cgcggggucuuUugacccuuu.....    | 4   | 1 | j20 |
| .....cgcggggUuuacugacccuuu.....    | 2   | 1 | j20 |
| .....cgcggggucuuacugacccuuu.....   | 446 | 0 | j20 |
| .....cgcggggucuuacugUccuuu.....    | 1   | 1 | j20 |
| .....cgcggggucuuacuCaaccuuu.....   | 1   | 1 | j20 |
| .....cgcggggucuuGugacccuuu.....    | 1   | 1 | j20 |
| .....cgcggggucuuacuAaccuuu.....    | 1   | 1 | j20 |
| .....cCggggucuuacugacccuuu.....    | 1   | 1 | j20 |
| .....cgcggggucuuacGgacccuuu.....   | 4   | 1 | j20 |
| .....cgcgUgucuuacugacccuuu.....    | 2   | 1 | j20 |
| .....cgcggggucuuacugaccGuu.....    | 2   | 1 | j20 |
| .....cgcggggucuuacugacAcuuu.....   | 1   | 1 | j20 |
| .....cgcgAggugucuuacugacccuuu..... | 1   | 1 | j20 |
| .....cgcgggCugucuuacugacccuuu..... | 1   | 1 | j20 |
| .....cgcggggucuuacugacccuuuA.....  | 12  | 1 | j20 |
| .....cgcggggucuuacugaAccuuu.....   | 1   | 1 | j20 |
| .....cgcggggucuuacugacccuuuU.....  | 21  | 0 | j20 |
| .....cgcggggucuuacugacccuuuU.....  | 1   | 1 | j20 |

cuaccgggucggaguuagcucaagcgguuaccuccuacugcggacuucuaucuguccaucucugucgggguuacgagaccgcgggugcuuacugaccuuuuuag

|                                        |    |   |     |
|----------------------------------------|----|---|-----|
| .....cgcgggugcuuacugaccuuuAa..         | 3  | 1 | j20 |
| .....gcgggugcuuacugaccuu.....          | 3  | 0 | j20 |
| .....Ccgggugcuuacugaccuu.....          | 1  | 1 | j20 |
| .....gcgggugcuuacugaccuu.....          | 3  | 0 | j20 |
| .....cgggugcuuacugaccuu.....           | 1  | 0 | j20 |
| .....gugcuuacugaccuuuu.....            | 1  | 0 | j20 |
| .....ccgggucggaguuagcucaagc.....       | 1  | 0 | A54 |
| .....ccgggucggaguuagcucaagcgg.....     | 1  | 0 | A54 |
| .....ccgggucggaguuagcucaagcgg.....     | 2  | 0 | A54 |
| .....ccgggucggaguuagcucaagcgguuU.....  | 1  | 1 | A54 |
| .....cgggucggaguuagcucaaa.....         | 2  | 0 | A54 |
| .....cgggucggaguuagcucaagcg.....       | 10 | 0 | A54 |
| .....cgggucggaguuagcucCagcgg.....      | 1  | 1 | A54 |
| .....cgggucggaguuagcucaagcguU.....     | 4  | 1 | A54 |
| .....cgggucggaguuagcucaagcga.....      | 8  | 1 | A54 |
| .....cgggCcgaguuagcucaagcgg.....       | 1  | 1 | A54 |
| .....cgggucggaguuagcucaagcgg.....      | 37 | 0 | A54 |
| .....cgggucggaguuacCucaagcgg.....      | 1  | 1 | A54 |
| .....cgggucggaguuagAuaagcgg.....       | 1  | 1 | A54 |
| .....cgggucggagGuaagcucaagcgg.....     | 1  | 1 | A54 |
| .....cgggucggaguuagcucaaaAacgg.....    | 1  | 1 | A54 |
| .....cgggucggaguuagcucaagcggC.....     | 3  | 1 | A54 |
| .....cgggucggaguuagcucaagcgg.....      | 81 | 0 | A54 |
| .....cgggucggaguuagcucCagcgg.....      | 1  | 1 | A54 |
| .....cggguUggaguuagcucaagcgg.....      | 1  | 1 | A54 |
| .....cgAgucggaguuagcucaagcgg.....      | 1  | 1 | A54 |
| .....cggCucggaguuagcucaagcgg.....      | 1  | 1 | A54 |
| .....cgggucggaguuagcucaagAggu.....     | 1  | 1 | A54 |
| .....cgggucggaguuagcucaagcguU.....     | 1  | 1 | A54 |
| .....cgggucggCguuagcucaagcgg.....      | 1  | 1 | A54 |
| .....cgggucggaguuagcucaagcguC.....     | 1  | 1 | A54 |
| .....cgggucggaguuagcucaagcgguu.....    | 9  | 0 | A54 |
| .....cgggucggaguuagcucaagcgguuU.....   | 2  | 1 | A54 |
| .....cgggucggaguuagcucaagcgguuU.....   | 1  | 1 | A54 |
| .....gggucggaguuagcucaagcgg.....       | 3  | 0 | A54 |
| .....gggucggaguuagcucaagcUg.....       | 1  | 1 | A54 |
| .....gggucggaguuagcGcaagcgg.....       | 1  | 1 | A54 |
| .....gggucggaguuagcucaagcggG.....      | 1  | 1 | A54 |
| .....gggucggaguuagcucaagcgg.....       | 6  | 0 | A54 |
| .....gggucggaguuagcucaaaUcgg.....      | 1  | 1 | A54 |
| .....gggucggaguuUcuaagcgg.....         | 1  | 1 | A54 |
| .....gggucggaguuagcucaagcgguuaccu..... | 1  | 0 | A54 |
| .....ggucggaguuagcucaagc.....          | 3  | 0 | A54 |
| .....gaccgcgggugcuuacugaccuuuuU.....   | 1  | 1 | A54 |
| .....accgcgggugcuuacugaccuuuu.....     | 2  | 0 | A54 |
| .....accgcgggugcuuacugacAcuuuu.....    | 1  | 1 | A54 |
| .....accgcggUugcuuacugaccuuuu.....     | 1  | 1 | A54 |
| .....cgcgggugcuuacugacc.....           | 3  | 0 | A54 |
| .....cgcgggugcuuacugaccu.....          | 2  | 0 | A54 |
| .....cgcgggugcuuacugaccuu.....         | 7  | 0 | A54 |
| .....cUcgggugcuuacugaccuu.....         | 1  | 1 | A54 |
| .....accgggucggaguuagcucaagcgg.....    | 1  | 0 | k12 |
| .....cgggucggaguuagcucaagcgg.....      | 3  | 0 | k12 |
| .....cgggucggaguuagcucaagcgg.....      | 2  | 0 | k12 |
| .....gggucggaguuagcucaagcgg.....       | 1  | 0 | k12 |
| .....gggucggaguuagcucaagcgg.....       | 2  | 0 | k12 |
| .....gggucggaguuagcucaagcggA.....      | 1  | 1 | k12 |
| .....gggucggaguuagcucaagcggGu.....     | 1  | 1 | k12 |
| .....cgcgggugcuuacugacc.....           | 1  | 0 | k12 |
| .....cgcgggugcuuacugaccu.....          | 1  | 0 | k12 |
| .....cgcgggugcuGacugaccu.....          | 1  | 1 | k12 |
| .....cgcgggugcuuacugaccuu.....         | 5  | 0 | k12 |
| .....cgcgggugcuuacugaccuu.....         | 4  | 0 | k12 |
| .....cgcgggAgcuuacugaccuu.....         | 1  | 1 | k12 |
| .....Accgggucggaguuagcucaagcgg.....    | 2  | 1 | j30 |
| .....cccgggucggaguuagcucaagcgg.....    | 1  | 0 | j30 |

cuaccgggucgggaguuagcucaagcgguuaccuccucaugccggacuucuaucuguccaucucugucgggguuucgagaccgcgggugcuuacugaccuuuuuag

|                                      |     |   |     |
|--------------------------------------|-----|---|-----|
| ....ccgggucgggaguuagcucaagcg.....    | 1   | 0 | j30 |
| ....ccgggucgggaguuagcucaagcgg.....   | 17  | 0 | j30 |
| ....Ucgggucgggaguuagcucaagcgg.....   | 1   | 1 | j30 |
| ....ccgggucgggaguuagcucaagcggA.....  | 3   | 1 | j30 |
| ....ccgggucgggaguuagcucaagcggC.....  | 1   | 1 | j30 |
| ....ccgggucgggaguuagcucaagcggG.....  | 36  | 0 | j30 |
| ....ccgggucgggaguuagcucaagcggU.....  | 1   | 1 | j30 |
| ....cgggucgggaguuagcucaa.....        | 1   | 0 | j30 |
| ....cgggucgggaguuagcucaag.....       | 1   | 0 | j30 |
| ....cgggucgggaguuagcucaagc.....      | 8   | 0 | j30 |
| ....cgggucgggaguuagcucaagcA.....     | 1   | 1 | j30 |
| ....cgggucgggaguuagcucaagcG.....     | 28  | 0 | j30 |
| ....cgggucgggaguuagcucaagcC.....     | 1   | 1 | j30 |
| ....cgggucgggaguuUcucuaagcgg.....    | 1   | 1 | j30 |
| ....cgggucgggaguuagcucaCgcgg.....    | 3   | 1 | j30 |
| ....cgggGcgggaguuagcucaagcgg.....    | 2   | 1 | j30 |
| ....cgggucgggaguuagcuUaagcgg.....    | 1   | 1 | j30 |
| ....cggCucgggaguuagcucaagcgg.....    | 1   | 1 | j30 |
| ....cgggucgggaguuagcucaagcggA.....   | 2   | 1 | j30 |
| ....cgggucgggaguuCgcuaagcgg.....     | 1   | 1 | j30 |
| ....cgggucgggaguuagcucaagAgg.....    | 2   | 1 | j30 |
| ....cgggucgggaguuagcucaagcgg.....    | 402 | 0 | j30 |
| ....cgggucgggaguuagcucaagcggA.....   | 7   | 1 | j30 |
| ....cGAgucgggaguuagcucaagcggG.....   | 1   | 1 | j30 |
| ....cgggucgggACuuagcucaagcggG.....   | 1   | 1 | j30 |
| ....cgggucgggaguuagcucaagcUgu.....   | 1   | 1 | j30 |
| ....cgggucgggaguuagcuUaagcgg.....    | 1   | 1 | j30 |
| ....cgggCcgggaguuagcucaagcggG.....   | 1   | 1 | j30 |
| ....GgggucgggaguuagcucaagcggG.....   | 1   | 1 | j30 |
| ....cgggucgggaguuagcuAaagcggG.....   | 2   | 1 | j30 |
| ....UgggucgggaguuagcucaagcggG.....   | 2   | 1 | j30 |
| ....cgggucgggUguuagcucaagcggG.....   | 1   | 1 | j30 |
| ....cgggGcgggaguuagcucaagcggG.....   | 4   | 1 | j30 |
| ....cgggucgggaguuagcucaagcggG.....   | 689 | 0 | j30 |
| ....cgggucgggAuuagcucaagcggG.....    | 1   | 1 | j30 |
| ....cgggucgggGuaagcucaagcggG.....    | 3   | 1 | j30 |
| ....cggCucgggaguuagcucaagcggG.....   | 1   | 1 | j30 |
| ....cgggucgggaguuagcucaaUcgg.....    | 1   | 1 | j30 |
| ....cgggucgggagCuagcucaagcggG.....   | 1   | 1 | j30 |
| ....cgggucgggaguuagcucaagcggG.....   | 3   | 1 | j30 |
| ....cgggucgggaguuagcucaagcGU.....    | 1   | 1 | j30 |
| ....cgggucAgaguuagcucaagcggG.....    | 1   | 1 | j30 |
| ....cgggucgggagUcagcucaagcggG.....   | 1   | 1 | j30 |
| ....cgggucgggaguuagcucaagAgg.....    | 1   | 1 | j30 |
| ....cgggucgggaguuagcucaagcggC.....   | 1   | 1 | j30 |
| ....cgggucgggaguuagUcaagcggG.....    | 2   | 1 | j30 |
| ....cgggUAggaguuagcucaagcggG.....    | 1   | 1 | j30 |
| ....cgggucgggGguuagcucaagcggG.....   | 1   | 1 | j30 |
| ....cgggucgggaguuagcucaagcgguu.....  | 49  | 0 | j30 |
| ....cgggucgggaguuagcucaagcggG.....   | 1   | 1 | j30 |
| ....cgggucgggaguuagcucaagcggUA.....  | 7   | 1 | j30 |
| ....cgggucgggaguuagcucaagcggUAa..... | 13  | 1 | j30 |
| ....gggucgggaguuagcucaagc.....       | 1   | 0 | j30 |
| ....gggucgggaguuagcucaagcG.....      | 4   | 0 | j30 |
| ....gggucgggaguuagcucaagcgg.....     | 20  | 0 | j30 |
| ....ggAucgggaguuagcucaagcggG.....    | 1   | 1 | j30 |
| ....gggucgggaguuagcucaagcggAu.....   | 1   | 1 | j30 |
| ....gggucgggaguuagcuUaagcggG.....    | 1   | 1 | j30 |
| ....gggucgggaguuagcucaagcggG.....    | 128 | 0 | j30 |
| ....gggucgggaguuagcucaagcggUG.....   | 1   | 1 | j30 |
| ....gggucgggaguuagcucaagcgguu.....   | 26  | 0 | j30 |
| ....gggucgggaguuagcucaagcggUA.....   | 4   | 1 | j30 |
| ....gggucgggaguuagcucaagcgguuu.....  | 1   | 0 | j30 |
| ....gggucgggaguuagcucaagcgguuU.....  | 4   | 1 | j30 |
| ....gggucgggaguuagcucaagcggUAa.....  | 2   | 1 | j30 |
| ....cgaguuagcucaagcgguuU.....        | 1   | 1 | j30 |
| ....ggaguuagcucaagcggG.....          | 1   | 0 | j30 |
| ....uaccuccucaugccggacuucuu.....     | 1   | 0 | j30 |
| ....ucaugccggacuucuu.....            | 1   | 0 | j30 |

cuaccgggucggaguuagcucaagcgguuaccucucuaugcggacuucuaucuguccaucucugugcugggguucgagaccgcgaggugcuuacugacccuuuaug

|                                  |     |   |     |
|----------------------------------|-----|---|-----|
| .....cugugcugggguucgagac.....    | 1   | 0 | j30 |
| .....cgaggugcuuacugacc.....      | 1   | 0 | j30 |
| .....cgaggugcuuacugacccu.....    | 5   | 0 | j30 |
| .....cgaggugcuuacugacccuu.....   | 115 | 0 | j30 |
| .....cgaggugcuuacugacccuA.....   | 7   | 1 | j30 |
| .....cgagggAgcuuacugacccuu.....  | 1   | 1 | j30 |
| .....cgaggugUuuacugacccuu.....   | 1   | 1 | j30 |
| .....cgaggugcuuacuUacccuu.....   | 1   | 1 | j30 |
| .....cgaggugcuuacugacccuAu.....  | 2   | 1 | j30 |
| .....cgaggugcuuacugacccuA.....   | 1   | 1 | j30 |
| .....cgagggCgcuuacugacccuu.....  | 1   | 1 | j30 |
| .....cgCggugcuuacugacccuu.....   | 1   | 1 | j30 |
| .....cgaggugcuuacugacccuu.....   | 72  | 0 | j30 |
| .....cgaggugcuuacugacccuuA.....  | 1   | 1 | j30 |
| .....cgaggugcuuacugacccuu.....   | 2   | 0 | j30 |
| .....cgaggugcuuacugacccuuua..... | 1   | 0 | j30 |
| .....cgaggugcuuacugacccuuU.....  | 1   | 1 | j30 |
| .....cgaggugcuuacugacccuu.....   | 1   | 0 | j30 |

Supl. Fig. 5

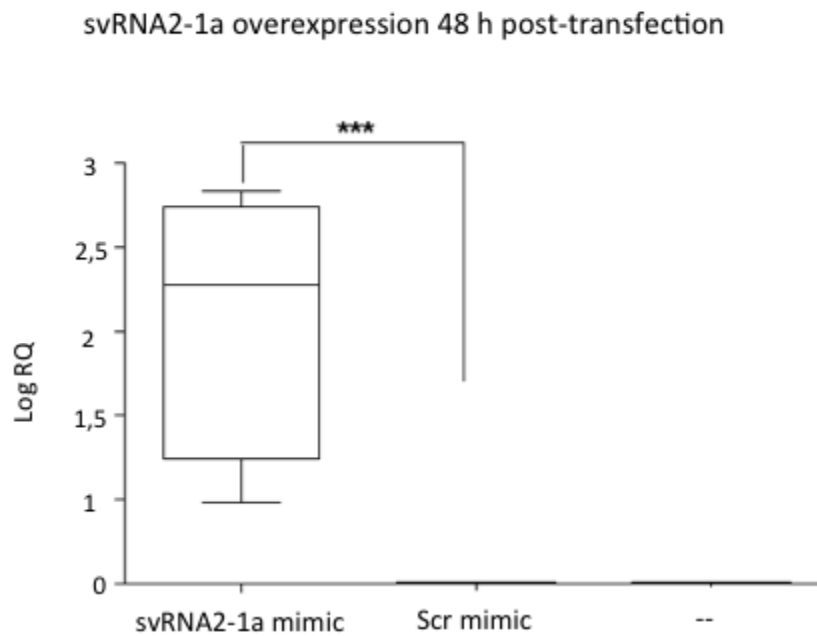

Supl. Fig. 5. svRNA2-1a expression levels 48 hours after transfection of differentiated SHSY-5Y cells with either specific svRNA2-1a mimics or a scrambled mimic. Relative expression for svRNA2-1a was assessed in the same RNA samples used for gene expression profiling by RT-PCR. Bar plot shows log RQ values  $\pm$  SEM (\*\*\*,  $p < 0,001$ ; using LMM)

Supl.T.1. Characteristics of PD and control cases brain samples; techniques and figures in which they were used

| n° | Braak staging | gender | age | post-mortem time | Amygdala   |               | Frontal Cortex |          | Cerebellum |         | Substantia Nigra |         |
|----|---------------|--------|-----|------------------|------------|---------------|----------------|----------|------------|---------|------------------|---------|
|    |               |        |     |                  | Techniques | Figures       | Techniques     | Figures  | Techniques | Figures | Techniques       | Figures |
| 1  | LBD 5         | M      | 66  | 5h               | x / o      | 1.A/ 2.A/ S.1 | x              | 1.B/ 2.B | x          | 1.C     | -                | -       |
| 2  | LBD 5         | M      | 88  | 2h               | x / o      | 1.A/ 2.A/ S.1 | x              | 1.B/ 2.B | x          | 1.C     | -                | -       |
| 3  | LBD 5         | M      | 77  | 11h              | x / o      | 1.A/ 2.A/ S.1 | x              | 1.B/ 2.B | x          | 1.C     | -                | -       |
| 4  | LBD 5         | M      | 82  | 16h 30           | x / o      | 1.A/ 2.A/ S.1 | x              | 1.B/ 2.B | x          | 1.C     | -                | -       |
| 5  | LBD 5         | F      | 84  | 4h               | x / o      | 1.A/ 2.A/ S.1 | x              | 1.B/ 2.B | x          | 1.C     | -                | -       |
| 6  | LBD 4         | M      | 68  | 4h 45            | x / o      | 1.A/ 2.A/ S.1 | x              | 1.B/ 2.B | x          | 1.C     | -                | -       |
| 7  | LBD 4         | M      | 51  | 9h 15            | x / o      | 1.A/ 2.A/ S.1 | x              | 1.B/ 2.B | x          | 1.C     | -                | -       |
| 8  | LBD 4         | M      | 69  | 5h 55            | x / o      | 1.A/ 2.A/ S.1 | x              | 1.B/ 2.B | x          | 1.C     | -                | -       |
| 9  | LBD 5         | F      | 85  | 6h 15            | x / o      | 1.A/ 2.A/ S.1 | x              | 1.B/ 2.B | x          | 1.C     | x                | 1.D     |
| 10 | LBD 5         | M      | 81  | 7h               | x / o      | 1.A/ 2.A/ S.1 | x              | 1.B/ 2.B | x          | 1.C     | x                | 1.D     |
| 11 | LBD 5         | F      | 54  | 10h 50           | x / o      | 1.A/ 2.A/ S.1 | x              | 1.B/ 2.B | x          | 1.C     | x                | 1.D     |
| 12 | LBD1          | M      | 68  | 14h 15           | x          | 2.A           | x              | 2.B      | -          | -       | -                | -       |
| 13 | LBD1          | M      | 74  | 10h 50           | x          | 2.A           | -              | -        | -          | -       | -                | -       |
| 14 | LBD 2         | M      | 33  | 3h 30            | x          | 2.A           | -              | -        | -          | -       | -                | -       |
| 15 | LBD 3         | F      | 70  | 10h 50           | x          | 2.A           | -              | -        | -          | -       | -                | -       |
| 16 | LBD1          | M      | 72  | 8h 55            | x          | 2.A           | x              | 2.B      | -          | -       | -                | -       |
| 17 | LBD1          | M      | 83  | 4h 30            | x          | 2.A           | x              | 2.B      | -          | -       | -                | -       |
| 18 | LBD4          | M      | 83  | 4h               | x          | 1.A/ 2.A      | x              | 1.B/ 2.B | -          | -       | x                | 1.D     |
| 19 | LBD4          | F      | 85  | 4h               | x          | 1.A/ 2.A      | x              | 1.B/ 2.B | -          | -       | x                | 1.D     |
| 20 | LBD1          | F      | 77  | 3h 15            | -          | -             | x              | 2.B      | -          | -       | -                | -       |
| 21 | LBD 4         | M      | 73  | 4h 40            | -          | -             | x              | 1.B/ 2.B | -          | -       | -                | -       |
| 22 | LBD 4         | F      | 77  | 3h 15            | -          | -             | -              | -        | -          | -       | x                | 1.D     |
| 23 | LBD 4         | F      | 70  | 4h 40            | -          | -             | -              | -        | -          | -       | x                | 1.D     |
| 24 | NL            | M      | 40  | 9h 15            | x / o      | 1.A/ 2.A/ S.1 | x              | 1.B/ 2.B | x          | 1.C     | -                | -       |
| 25 | NL            | F      | 24  | 6h               | x / o      | 1.A/ 2.A/ S.1 | x              | 1.B/ 2.B | x          | 1.C     | -                | -       |
| 26 | NL            | F      | 47  | 9h 35            | x / o      | 1.A/ 2.A/ S.1 | x              | 1.B/ 2.B | x          | 1.C     | -                | -       |
| 27 | NL            | M      | 71  | 12h              | x / o      | 1.A/ 2.A/ S.1 | x              | 1.B/ 2.B | x          | 1.C     | -                | -       |
| 28 | NL            | M      | 30  | 4h 10            | x / o      | 1.A/ 2.A/ S.1 | x              | 1.B/ 2.B | x          | 1.C     | -                | -       |
| 29 | NL            | F      | 46  | 14h 15           | x / o      | 1.A/ 2.A/ S.1 | x              | 1.B/ 2.B | x          | 1.C     | -                | -       |
| 30 | NL            | M      | 56  | 5h               | x          | 1.A/ 2.A      | -              | -        | -          | -       | x                | 1.D     |
| 31 | NL            | M      | 59  | 6h 25            | x          | 1.A/ 2.A      | -              | -        | -          | -       | -                | -       |
| 32 | NL            | F      | 71  | 8h 30            | x          | 1.A/ 2.A      | -              | -        | -          | -       | -                | -       |
| 33 | NL            | M      | 66  | 3h 5             | x          | 1.A/ 2.A      | x              | 1.B/ 2.B | -          | -       | -                | -       |
| 34 | NL            | F      | 81  | 4h               | x          | 1.A/ 2.A      | x              | 1.B/ 2.B | -          | -       | -                | -       |
| 35 | NL            | F      | 64  | 5h               | x          | 1.A/ 2.A      | x              | 1.B/ 2.B | -          | -       | -                | -       |
| 36 | NL            | F      | 49  | 7h               | -          | -             | x              | 1.B/ 2.B | x          | 1.C     | -                | -       |
| 37 | NL            | M      | 79  | 7h               | -          | -             | x              | 1.B/ 2.B | x          | 1.C     | -                | -       |
| 38 | NL            | F      | 75  | 3h               | -          | -             | x              | 1.B/ 2.B | x          | 1.C     | -                | -       |
| 39 | NL            | M      | 35  | 8h               | -          | -             | x              | 1.B/ 2.B | x          | 1.C     | -                | -       |
| 40 | NL            | F      | 65  | 4h               | -          | -             | x              | 1.B/ 2.B | x          | 1.C     | -                | -       |
| 41 | NL            | M      | 53  | 3h               | -          | -             | x              | 1.B/ 2.B | x          | 1.C     | -                | -       |
| 42 | NL            | M      | 62  | 3h               | -          | -             | x              | 1.B/ 2.B | x          | 1.C     | -                | -       |
| 43 | NL            | M      | 67  | 5h               | -          | -             | x              | 1.B/ 2.B | x          | 1.C     | x                | 1.D     |
| 44 | NL            | M      | 85  | 5h 45            | -          | -             | x              | 1.B/ 2.B | x          | 1.C     | -                | -       |
| 45 | NL            | M      | 78  | 2h 15            | -          | -             | x              | 1.B/ 2.B | x          | 1.C     | -                | -       |
| 46 | NL            | M      | 58  | 4h               | -          | -             | x              | 1.B/ 2.B | x          | 1.C     | -                | -       |
| 47 | NL            | F      | 78  | 3h 40            | -          | -             | x              | 1.B/ 2.B | -          | -       | -                | -       |
| 48 | NL            | M      | 53  | 7h 25            | -          | -             | -              | -        | -          | -       | x                | 1.D     |
| 49 | NL            | M      | 56  | 3h 50            | -          | -             | -              | -        | -          | -       | x                | 1.D     |
| 50 | NL            | M      | 39  | 3h 30            | -          | -             | -              | -        | -          | -       | x                | 1.D     |
| 51 | NL            | F      | 55  | 8h 30            | -          | -             | -              | -        | -          | -       | x                | 1.D     |

x: RT-PCR

o: Exiqon arrays

-: not available

NL: no lesions

LBD: Lewy body disease pathology (1-6 refers to Braak staging)

Supl.T.2: genes with predicted target sites in the 3'UTR for svRNA2-1a, by at least 2 different algorithms

| Gene     | miRanda | miRDB | miRWalk | PITA | Targetscan | microCosm | total |
|----------|---------|-------|---------|------|------------|-----------|-------|
| BCAT2    | 1       |       | 1       | 1    | 1          | 1         | 5     |
| EN1      | 1       |       | 1       | 1    | 1          | 1         | 5     |
| JMJD2A   | 1       | 1     | 1       | 1    | 1          |           | 5     |
| KCNA1    | 1       |       | 1       | 1    | 1          | 1         | 5     |
| KIAA0774 | 1       |       | 1       | 1    | 1          | 1         | 5     |
| SEPT5    | 1       | 1     | 1       | 1    | 1          |           | 5     |
| TBX19    | 1       |       | 1       | 1    | 1          | 1         | 5     |
| TLX3     | 1       |       | 1       | 1    | 1          | 1         | 5     |
| TRIM54   | 1       |       | 1       | 1    | 1          | 1         | 5     |
| ARSG     |         |       | 1       | 1    | 1          | 1         | 4     |
| BAI1     | 1       |       |         | 1    | 1          | 1         | 4     |
| BHLHB5   | 1       |       | 1       | 1    | 1          |           | 4     |
| BRSK2    |         |       | 1       | 1    | 1          | 1         | 4     |
| C17orf82 |         |       | 1       | 1    | 1          | 1         | 4     |
| C19orf47 | 1       |       | 1       | 1    | 1          |           | 4     |
| CALM1    | 1       |       | 1       | 1    | 1          |           | 4     |
| CAMKK2   | 1       |       | 1       | 1    | 1          |           | 4     |
| CDC123   | 1       |       |         | 1    | 1          | 1         | 4     |
| CHD3     | 1       |       |         | 1    | 1          | 1         | 4     |
| CNN1     | 1       |       |         | 1    | 1          | 1         | 4     |
| CSNK2A2  | 1       |       |         | 1    | 1          | 1         | 4     |
| CX3CL1   |         |       | 1       | 1    | 1          | 1         | 4     |
| DAG1     | 1       |       | 1       | 1    | 1          |           | 4     |
| DAGLA    | 1       |       | 1       | 1    | 1          |           | 4     |
| DENND1A  | 1       |       | 1       | 1    |            | 1         | 4     |
| DERL3    |         |       | 1       | 1    | 1          | 1         | 4     |
| DGCR14   | 1       |       | 1       | 1    | 1          |           | 4     |
| DMPK     | 1       |       |         | 1    | 1          | 1         | 4     |
| EFHD2    | 1       |       | 1       | 1    | 1          |           | 4     |
| EGR3     | 1       |       | 1       | 1    | 1          |           | 4     |
| ENG      | 1       |       |         | 1    | 1          | 1         | 4     |
| FA2H     |         |       | 1       | 1    | 1          | 1         | 4     |
| FAM109B  |         |       | 1       | 1    | 1          | 1         | 4     |
| FAM43B   |         |       | 1       | 1    | 1          | 1         | 4     |



|          |   |   |   |   |   |   |   |
|----------|---|---|---|---|---|---|---|
| FBXO41   | 1 |   | 1 | 1 | 1 |   | 4 |
| FLJ40125 | 1 | 1 |   | 1 | 1 |   | 4 |
| FOXN3    | 1 |   | 1 | 1 | 1 |   | 4 |
| GNG3     | 1 |   |   | 1 | 1 | 1 | 4 |
| GNL3L    | 1 |   | 1 | 1 | 1 |   | 4 |
| GPR107   | 1 |   | 1 | 1 | 1 |   | 4 |
| HSPB6    |   | 1 |   | 1 | 1 | 1 | 4 |
| KIAA1539 | 1 |   | 1 | 1 |   | 1 | 4 |
| KPNA6    | 1 |   | 1 | 1 | 1 |   | 4 |
| L3MBTL2  |   |   | 1 | 1 | 1 | 1 | 4 |
| LASS3    | 1 |   | 1 | 1 | 1 |   | 4 |
| LMTK3    | 1 |   |   | 1 | 1 | 1 | 4 |
| LRTM2    |   |   | 1 | 1 | 1 | 1 | 4 |
| LZTS2    | 1 |   |   | 1 | 1 | 1 | 4 |
| MAPKAPK3 | 1 |   | 1 | 1 | 1 |   | 4 |
| MBD6     | 1 |   | 1 | 1 |   | 1 | 4 |
| MINK1    | 1 |   | 1 | 1 | 1 |   | 4 |
| MUPCDH   |   |   | 1 | 1 | 1 | 1 | 4 |
| MYF6     |   |   | 1 | 1 | 1 | 1 | 4 |
| NAV1     | 1 |   | 1 | 1 | 1 |   | 4 |
| NEUROG1  | 1 |   |   | 1 | 1 | 1 | 4 |
| NPEPPS   | 1 |   | 1 | 1 | 1 |   | 4 |
| PPARD    | 1 |   | 1 | 1 | 1 |   | 4 |
| PPP1CA   | 1 |   |   | 1 | 1 | 1 | 4 |
| PRMT2    |   |   | 1 | 1 | 1 | 1 | 4 |
| PRSS22   |   |   | 1 | 1 | 1 | 1 | 4 |
| PVR      | 1 |   | 1 | 1 | 1 |   | 4 |
| RANBP9   | 1 |   |   | 1 | 1 | 1 | 4 |
| RASGEF1C | 1 |   |   | 1 | 1 | 1 | 4 |
| RNF24    |   |   | 1 | 1 | 1 | 1 | 4 |
| RTN4R    |   |   | 1 | 1 | 1 | 1 | 4 |
| RUNX3    |   |   | 1 | 1 | 1 | 1 | 4 |
| SBNO2    |   |   | 1 | 1 | 1 | 1 | 4 |
| SHROOM4  | 1 |   | 1 | 1 | 1 |   | 4 |
| SLC25A35 | 1 |   | 1 | 1 |   | 1 | 4 |
| SLC35A2  | 1 |   |   | 1 | 1 | 1 | 4 |
| SLC6A1   |   |   | 1 | 1 | 1 | 1 | 4 |
| SMC1A    | 1 |   | 1 | 1 | 1 |   | 4 |
| SMPDL3B  |   |   | 1 | 1 | 1 | 1 | 4 |
| SPRED2   | 1 |   | 1 | 1 | 1 |   | 4 |
| TMEM62   | 1 |   |   | 1 | 1 | 1 | 4 |

|           |   |   |   |   |   |   |   |
|-----------|---|---|---|---|---|---|---|
| TMEM88    |   |   | 1 | 1 | 1 | 1 | 4 |
| TRABD     |   |   | 1 | 1 | 1 | 1 | 4 |
| TSPAN14   | 1 |   | 1 | 1 | 1 |   | 4 |
| TULP4     |   | 1 | 1 | 1 | 1 |   | 4 |
| UBE2M     | 1 |   |   | 1 | 1 | 1 | 4 |
| UVRAG     | 1 |   | 1 | 1 | 1 |   | 4 |
| WBSCR18   | 1 |   | 1 | 1 |   | 1 | 4 |
| WDR68     | 1 |   | 1 | 1 | 1 |   | 4 |
| ZFPL1     | 1 |   |   | 1 | 1 | 1 | 4 |
| ZNF385A   | 1 |   | 1 | 1 | 1 |   | 4 |
| ABCF1     | 1 |   | 1 |   |   | 1 | 3 |
| ADAM33    |   |   |   | 1 | 1 | 1 | 3 |
| ADCY9     |   |   | 1 | 1 | 1 |   | 3 |
| ALDH1A3   | 1 |   | 1 | 1 |   |   | 3 |
| ALPK3     |   |   | 1 | 1 | 1 |   | 3 |
| ANKRD45   |   |   | 1 | 1 | 1 |   | 3 |
| ANTXR1    | 1 |   | 1 | 1 |   |   | 3 |
| AP4E1     | 1 |   | 1 | 1 |   |   | 3 |
| ARHGDI1A  |   |   |   | 1 | 1 | 1 | 3 |
| ATRN      |   |   | 1 | 1 | 1 |   | 3 |
| B3GAT3    | 1 |   |   | 1 |   | 1 | 3 |
| BARHL1    |   |   |   | 1 | 1 | 1 | 3 |
| BCL3      | 1 |   |   | 1 |   | 1 | 3 |
| BRD3      |   |   | 1 | 1 |   | 1 | 3 |
| BRD4      | 1 |   |   | 1 |   | 1 | 3 |
| BSND      | 1 |   |   | 1 |   | 1 | 3 |
| BTBD12    |   |   |   | 1 | 1 | 1 | 3 |
| C10orf10  |   |   | 1 | 1 | 1 |   | 3 |
| C14orf181 | 1 |   |   | 1 | 1 |   | 3 |
| C17orf66  | 1 |   |   | 1 |   | 1 | 3 |
| C19orf12  |   |   |   | 1 | 1 | 1 | 3 |
| C19orf36  |   |   |   | 1 | 1 | 1 | 3 |
| C1orf76   | 1 |   | 1 | 1 |   |   | 3 |
| C3orf38   | 1 |   | 1 | 1 |   |   | 3 |
| C9orf25   |   |   | 1 | 1 | 1 |   | 3 |
| CACNG4    |   |   | 1 | 1 | 1 |   | 3 |
| CALN1     |   |   | 1 | 1 | 1 |   | 3 |
| CARD9     |   |   | 1 | 1 |   | 1 | 3 |
| CASKIN1   |   |   | 1 | 1 |   | 1 | 3 |
| CAV1      | 1 |   | 1 | 1 |   |   | 3 |
| CBFA2T2   |   |   | 1 | 1 | 1 |   | 3 |

|          |   |   |   |   |   |   |   |
|----------|---|---|---|---|---|---|---|
| CCDC92   |   | 1 |   | 1 | 1 |   | 3 |
| CD34     | 1 |   | 1 | 1 |   |   | 3 |
| CD6      | 1 |   |   | 1 |   | 1 | 3 |
| CDC42EP2 |   |   |   | 1 | 1 | 1 | 3 |
| CDH15    |   |   |   | 1 | 1 | 1 | 3 |
| CEP27    |   |   | 1 | 1 | 1 |   | 3 |
| CHD5     |   |   | 1 | 1 | 1 |   | 3 |
| CHRAC1   |   |   | 1 | 1 | 1 |   | 3 |
| CIDEB    |   |   | 1 | 1 | 1 |   | 3 |
| CITED4   | 1 |   |   | 1 |   | 1 | 3 |
| CLEC4F   | 1 |   |   | 1 |   | 1 | 3 |
| CLSTN2   | 1 |   |   | 1 |   | 1 | 3 |
| CNTD2    |   |   | 1 | 1 | 1 |   | 3 |
| COASY    |   |   | 1 | 1 |   | 1 | 3 |
| COL12A1  | 1 |   | 1 | 1 |   |   | 3 |
| COL5A1   |   |   |   | 1 | 1 | 1 | 3 |
| COL6A2   |   |   | 1 | 1 |   | 1 | 3 |
| CPEB3    | 1 |   | 1 |   | 1 |   | 3 |
| CPEB4    | 1 |   | 1 | 1 |   |   | 3 |
| CRYBB3   |   |   | 1 | 1 |   | 1 | 3 |
| CSH2     | 1 |   |   | 1 |   | 1 | 3 |
| CSNK1E   |   |   | 1 | 1 |   | 1 | 3 |
| CUX1     |   |   | 1 | 1 | 1 |   | 3 |
| CYP2W1   |   |   |   | 1 | 1 | 1 | 3 |
| D4S234E  | 1 |   |   | 1 | 1 |   | 3 |
| DIRAS1   | 1 |   |   | 1 | 1 |   | 3 |
| DLG2     | 1 |   | 1 | 1 |   |   | 3 |
| DLX1     |   |   | 1 | 1 | 1 |   | 3 |
| DUSP13   |   |   | 1 | 1 |   | 1 | 3 |
| DUSP8    |   |   | 1 | 1 |   | 1 | 3 |
| DVL1     |   |   | 1 | 1 |   | 1 | 3 |
| ECH1     |   |   |   | 1 | 1 | 1 | 3 |
| EDA      | 1 |   | 1 | 1 |   |   | 3 |
| EHBP1L1  |   |   |   | 1 | 1 | 1 | 3 |
| ENAM     |   |   | 1 | 1 | 1 |   | 3 |
| ERBB2    |   |   | 1 | 1 | 1 |   | 3 |
| ESPN     |   |   |   | 1 | 1 | 1 | 3 |
| FAM20A   |   |   |   | 1 | 1 | 1 | 3 |
| FAM53C   | 1 |   |   | 1 | 1 |   | 3 |
| FANCE    |   |   |   | 1 | 1 | 1 | 3 |
| FBXO39   | 1 |   |   | 1 |   | 1 | 3 |

|          |   |  |   |   |   |   |   |
|----------|---|--|---|---|---|---|---|
| FGF17    |   |  | 1 | 1 | 1 |   | 3 |
| FLT4     |   |  |   | 1 | 1 | 1 | 3 |
| FOSB     | 1 |  |   | 1 | 1 |   | 3 |
| FOXP4    |   |  |   | 1 | 1 | 1 | 3 |
| FXYD7    |   |  |   | 1 | 1 | 1 | 3 |
| FYTTD1   |   |  | 1 | 1 | 1 |   | 3 |
| GABRB3   |   |  | 1 | 1 | 1 |   | 3 |
| GNB3     |   |  |   | 1 | 1 | 1 | 3 |
| GNG7     |   |  | 1 | 1 | 1 |   | 3 |
| GPBP1L1  | 1 |  |   | 1 |   | 1 | 3 |
| GPI      | 1 |  |   | 1 |   | 1 | 3 |
| GPR62    | 1 |  | 1 | 1 |   |   | 3 |
| GUK1     |   |  |   | 1 | 1 | 1 | 3 |
| HCST     | 1 |  |   | 1 |   | 1 | 3 |
| HDLBP    |   |  | 1 | 1 |   | 1 | 3 |
| HEMK1    | 1 |  |   | 1 | 1 |   | 3 |
| HLA-DOA  |   |  | 1 | 1 | 1 |   | 3 |
| HOOK1    | 1 |  | 1 | 1 |   |   | 3 |
| HOXC5    |   |  |   | 1 | 1 | 1 | 3 |
| HS1BP3   |   |  |   | 1 | 1 | 1 | 3 |
| ICA1L    |   |  | 1 | 1 |   | 1 | 3 |
| IGF2BP1  | 1 |  | 1 | 1 |   |   | 3 |
| IKZF4    | 1 |  | 1 | 1 |   |   | 3 |
| IRF2BP1  | 1 |  |   | 1 | 1 |   | 3 |
| ISL1     |   |  | 1 | 1 | 1 |   | 3 |
| ITGA5    | 1 |  | 1 | 1 |   |   | 3 |
| JAZF1    | 1 |  | 1 | 1 |   |   | 3 |
| JMJD3    | 1 |  | 1 | 1 |   |   | 3 |
| JUNB     | 1 |  |   | 1 |   | 1 | 3 |
| KCNAB2   |   |  |   | 1 | 1 | 1 | 3 |
| KCNJ5    |   |  | 1 | 1 | 1 |   | 3 |
| KCTD17   |   |  |   | 1 | 1 | 1 | 3 |
| KDELC2   |   |  | 1 | 1 | 1 |   | 3 |
| KIAA0515 |   |  | 1 | 1 |   | 1 | 3 |
| KIAA0892 |   |  |   | 1 | 1 | 1 | 3 |
| KIAA1219 | 1 |  | 1 | 1 |   |   | 3 |
| KIAA1755 |   |  | 1 | 1 | 1 |   | 3 |
| KIAA1853 | 1 |  |   | 1 | 1 |   | 3 |
| KIF23    | 1 |  | 1 | 1 |   |   | 3 |
| KIT      | 1 |  | 1 | 1 |   |   | 3 |
| KLC2     | 1 |  |   | 1 | 1 |   | 3 |

|         |   |   |   |   |   |   |   |
|---------|---|---|---|---|---|---|---|
| KLF12   | 1 |   | 1 | 1 |   |   | 3 |
| KLK5    | 1 |   |   | 1 |   | 1 | 3 |
| KRAS    |   |   | 1 | 1 | 1 |   | 3 |
| LAMC2   | 1 |   | 1 | 1 |   |   | 3 |
| LENG8   | 1 |   |   | 1 | 1 |   | 3 |
| LHX5    |   |   |   | 1 | 1 | 1 | 3 |
| LRCH4   |   |   |   | 1 | 1 | 1 | 3 |
| MAF1    | 1 |   |   | 1 |   | 1 | 3 |
| MAN1C1  | 1 |   |   | 1 |   | 1 | 3 |
| MAP3K14 | 1 |   |   | 1 |   | 1 | 3 |
| MARK4   | 1 |   |   | 1 | 1 |   | 3 |
| MCOLN1  | 1 |   |   | 1 | 1 |   | 3 |
| MECP2   | 1 |   | 1 | 1 |   |   | 3 |
| MEN1    |   |   |   | 1 | 1 | 1 | 3 |
| MEX3A   |   |   | 1 | 1 |   | 1 | 3 |
| MGLL    |   |   | 1 | 1 | 1 |   | 3 |
| MLL2    | 1 |   | 1 | 1 |   |   | 3 |
| MMEL1   |   |   |   | 1 | 1 | 1 | 3 |
| MOV10   | 1 |   |   | 1 |   | 1 | 3 |
| MRPL19  |   |   | 1 | 1 | 1 |   | 3 |
| MSI2    |   |   | 1 | 1 | 1 |   | 3 |
| MT1X    | 1 |   |   | 1 |   | 1 | 3 |
| MTMR7   |   |   | 1 | 1 | 1 |   | 3 |
| MUC20   |   |   | 1 | 1 |   | 1 | 3 |
| N-PAC   | 1 |   | 1 | 1 |   |   | 3 |
| NCKAP1L | 1 |   |   | 1 |   | 1 | 3 |
| NDUFS8  |   |   |   | 1 | 1 | 1 | 3 |
| NINJ1   |   |   |   | 1 | 1 | 1 | 3 |
| NKX2-3  |   |   |   | 1 | 1 | 1 | 3 |
| NPR1    |   |   |   | 1 | 1 | 1 | 3 |
| NTNG2   | 1 |   |   | 1 |   | 1 | 3 |
| NXF1    |   |   | 1 | 1 |   | 1 | 3 |
| OAZ2    | 1 |   |   | 1 | 1 |   | 3 |
| OLIG2   |   |   |   | 1 | 1 | 1 | 3 |
| OR2C3   |   |   | 1 | 1 | 1 |   | 3 |
| OTX2    | 1 |   | 1 | 1 |   |   | 3 |
| P2RX1   |   |   |   | 1 | 1 | 1 | 3 |
| PAPPA2  | 1 | 1 |   | 1 |   |   | 3 |
| PARP10  |   |   |   | 1 | 1 | 1 | 3 |
| PAX1    |   |   | 1 | 1 |   | 1 | 3 |
| PDGFRL  |   |   |   | 1 | 1 | 1 | 3 |

|          |   |  |   |   |   |   |   |
|----------|---|--|---|---|---|---|---|
| PDZD4    |   |  | 1 | 1 | 1 |   | 3 |
| PEX19    |   |  | 1 | 1 | 1 |   | 3 |
| PFKFB2   | 1 |  | 1 | 1 |   |   | 3 |
| PHOSPHO1 |   |  |   | 1 | 1 | 1 | 3 |
| PIK3CD   |   |  | 1 | 1 | 1 |   | 3 |
| PIP5K1C  | 1 |  |   | 1 | 1 |   | 3 |
| PITX1    |   |  |   | 1 | 1 | 1 | 3 |
| PKM2     |   |  | 1 | 1 |   | 1 | 3 |
| PLXDC1   |   |  | 1 | 1 | 1 |   | 3 |
| PLXNA3   | 1 |  |   | 1 |   | 1 | 3 |
| PM20D1   | 1 |  |   | 1 | 1 |   | 3 |
| PNKD     | 1 |  |   | 1 | 1 |   | 3 |
| POLR3H   | 1 |  | 1 | 1 |   |   | 3 |
| PPP1R9B  | 1 |  |   | 1 |   | 1 | 3 |
| PPP2R1A  | 1 |  |   | 1 |   | 1 | 3 |
| PRAF2    |   |  |   | 1 | 1 | 1 | 3 |
| PRDM10   | 1 |  | 1 | 1 |   |   | 3 |
| PRDM16   |   |  | 1 | 1 |   | 1 | 3 |
| PSCD3    |   |  | 1 | 1 | 1 |   | 3 |
| PXMP3    | 1 |  | 1 | 1 |   |   | 3 |
| PYY      |   |  |   | 1 | 1 | 1 | 3 |
| RABEP2   |   |  |   | 1 | 1 | 1 | 3 |
| RANBP10  | 1 |  | 1 | 1 |   |   | 3 |
| RASL10B  |   |  | 1 | 1 | 1 |   | 3 |
| RAVER1   |   |  | 1 | 1 | 1 |   | 3 |
| RAX      |   |  |   | 1 | 1 | 1 | 3 |
| RELT     |   |  | 1 | 1 | 1 |   | 3 |
| REN      | 1 |  |   | 1 |   | 1 | 3 |
| RHOBTB2  |   |  | 1 | 1 | 1 |   | 3 |
| RNF216   |   |  | 1 | 1 | 1 |   | 3 |
| RNF44    | 1 |  |   | 1 | 1 |   | 3 |
| RSPO4    |   |  | 1 | 1 | 1 |   | 3 |
| RUVBL2   | 1 |  |   | 1 | 1 |   | 3 |
| SC5DL    |   |  | 1 | 1 |   | 1 | 3 |
| SCN1B    | 1 |  |   | 1 |   | 1 | 3 |
| SCUBE3   | 1 |  |   | 1 | 1 |   | 3 |
| SELENBP1 |   |  |   | 1 | 1 | 1 | 3 |
| SEMA4A   | 1 |  |   | 1 |   | 1 | 3 |
| SEPT11   |   |  |   | 1 | 1 | 1 | 3 |
| SETD7    |   |  | 1 | 1 | 1 |   | 3 |
| SFN      |   |  |   | 1 | 1 | 1 | 3 |

|          |   |  |   |   |   |   |   |
|----------|---|--|---|---|---|---|---|
| SFTPG    |   |  |   | 1 | 1 | 1 | 3 |
| SGTA     |   |  | 1 | 1 | 1 |   | 3 |
| SH3PXD2A | 1 |  | 1 | 1 |   |   | 3 |
| SHANK3   | 1 |  |   | 1 | 1 |   | 3 |
| SIAH2    | 1 |  |   | 1 | 1 |   | 3 |
| SLC29A4  |   |  | 1 | 1 |   | 1 | 3 |
| SLC37A1  |   |  |   | 1 | 1 | 1 | 3 |
| SLC38A3  |   |  |   | 1 | 1 | 1 | 3 |
| SLC6A18  |   |  |   | 1 | 1 | 1 | 3 |
| SMCR8    | 1 |  | 1 |   |   | 1 | 3 |
| SNTA1    | 1 |  |   | 1 |   | 1 | 3 |
| SORBS3   | 1 |  |   | 1 |   | 1 | 3 |
| SPI1     |   |  | 1 | 1 |   | 1 | 3 |
| SPTB     |   |  | 1 | 1 |   | 1 | 3 |
| SRD5A2   | 1 |  | 1 |   |   | 1 | 3 |
| SSH2     |   |  | 1 | 1 | 1 |   | 3 |
| ST3GAL2  |   |  | 1 | 1 |   | 1 | 3 |
| ST8SIA2  |   |  | 1 | 1 | 1 |   | 3 |
| SUV39H1  | 1 |  |   | 1 | 1 |   | 3 |
| SYT5     |   |  |   | 1 | 1 | 1 | 3 |
| TAGLN    | 1 |  |   | 1 |   | 1 | 3 |
| TBC1D13  |   |  | 1 | 1 | 1 |   | 3 |
| TBC1D22A |   |  |   | 1 | 1 | 1 | 3 |
| TBL1XR1  | 1 |  | 1 | 1 |   |   | 3 |
| TBR1     | 1 |  | 1 | 1 |   |   | 3 |
| TBR1     |   |  | 1 |   | 1 | 1 | 3 |
| TCF3     |   |  | 1 | 1 | 1 |   | 3 |
| TCF7L1   |   |  | 1 | 1 | 1 |   | 3 |
| TFEB     |   |  |   | 1 | 1 | 1 | 3 |
| THAP6    | 1 |  | 1 | 1 |   |   | 3 |
| THSD7B   | 1 |  | 1 | 1 |   |   | 3 |
| TMC2     | 1 |  |   | 1 |   | 1 | 3 |
| TMEM145  | 1 |  |   | 1 |   | 1 | 3 |
| TMEM63C  |   |  | 1 | 1 | 1 |   | 3 |
| TMUB1    | 1 |  |   | 1 |   | 1 | 3 |
| TNRC6C   |   |  |   | 1 | 1 | 1 | 3 |
| TOLLIP   |   |  | 1 | 1 | 1 |   | 3 |
| TOM1L2   |   |  | 1 | 1 | 1 |   | 3 |
| TRAM2    |   |  | 1 | 1 | 1 |   | 3 |
| TRAPPC4  | 1 |  |   | 1 |   | 1 | 3 |
| TRIM50   |   |  | 1 | 1 |   | 1 | 3 |

|          |   |  |   |   |   |   |   |
|----------|---|--|---|---|---|---|---|
| TSC1     |   |  | 1 | 1 | 1 |   | 3 |
| TSKU     |   |  |   | 1 | 1 | 1 | 3 |
| TTBK1    |   |  | 1 | 1 | 1 |   | 3 |
| TTC9C    | 1 |  |   | 1 |   | 1 | 3 |
| TTYH1    | 1 |  |   | 1 |   | 1 | 3 |
| TUBB4    |   |  |   | 1 | 1 | 1 | 3 |
| TUSC1    | 1 |  | 1 | 1 |   |   | 3 |
| UBL4A    |   |  | 1 | 1 | 1 |   | 3 |
| USP19    | 1 |  |   | 1 |   | 1 | 3 |
| VDAC3    | 1 |  |   | 1 |   | 1 | 3 |
| VPS13D   |   |  | 1 | 1 | 1 |   | 3 |
| WNT9B    |   |  | 1 | 1 |   | 1 | 3 |
| WWC2     |   |  | 1 | 1 | 1 |   | 3 |
| WWP2     |   |  | 1 | 1 | 1 |   | 3 |
| ZBTB7A   |   |  | 1 | 1 | 1 |   | 3 |
| ZHX3     |   |  | 1 | 1 |   | 1 | 3 |
| ZKSCAN1  |   |  | 1 | 1 | 1 |   | 3 |
| ZNF304   | 1 |  | 1 | 1 |   |   | 3 |
| ZNF37A   |   |  | 1 | 1 | 1 |   | 3 |
| ZNF395   |   |  | 1 | 1 | 1 |   | 3 |
| ZNF580   | 1 |  |   | 1 | 1 |   | 3 |
| ZNF618   |   |  | 1 | 1 | 1 |   | 3 |
| ZNF740   |   |  | 1 | 1 | 1 |   | 3 |
| ZNF785   |   |  | 1 | 1 | 1 |   | 3 |
| ABCA2    |   |  |   | 1 |   | 1 | 2 |
| ABCC1    |   |  | 1 | 1 |   |   | 2 |
| ABCG8    |   |  |   | 1 |   | 1 | 2 |
| ABHD2    |   |  | 1 | 1 |   |   | 2 |
| ABHD4    | 1 |  |   | 1 |   |   | 2 |
| ABLIM1   |   |  | 1 | 1 |   |   | 2 |
| ABLIM3   |   |  | 1 | 1 |   |   | 2 |
| ACAD11   |   |  |   | 1 |   | 1 | 2 |
| ACO2     |   |  |   | 1 |   | 1 | 2 |
| ACPP     |   |  | 1 | 1 |   |   | 2 |
| ACSBG1   |   |  |   | 1 | 1 |   | 2 |
| ACSF3    |   |  | 1 | 1 |   |   | 2 |
| ACSM5    | 1 |  |   | 1 |   |   | 2 |
| ACVRL1   |   |  | 1 | 1 |   |   | 2 |
| ADAM8    |   |  | 1 | 1 |   |   | 2 |
| ADAMTS17 |   |  | 1 | 1 |   |   | 2 |
| ADAMTSL4 |   |  | 1 | 1 |   |   | 2 |



|          |   |  |   |   |   |   |   |
|----------|---|--|---|---|---|---|---|
| ADARB1   |   |  | 1 | 1 |   |   | 2 |
| ADARB2   |   |  |   | 1 |   | 1 | 2 |
| ADAT2    |   |  | 1 | 1 |   |   | 2 |
| ADCY1    |   |  | 1 | 1 |   |   | 2 |
| ADCY3    |   |  | 1 | 1 |   |   | 2 |
| ADD1     |   |  | 1 | 1 |   |   | 2 |
| ADH6     |   |  |   | 1 | 1 |   | 2 |
| ADM2     |   |  |   | 1 | 1 |   | 2 |
| ADO      |   |  | 1 | 1 |   |   | 2 |
| ADRBK2   |   |  | 1 | 1 |   |   | 2 |
| AES      |   |  |   | 1 | 1 |   | 2 |
| AFF2     |   |  |   | 1 | 1 |   | 2 |
| AGPAT3   |   |  | 1 | 1 |   |   | 2 |
| AHCYL2   |   |  | 1 | 1 |   |   | 2 |
| AK1      |   |  | 1 | 1 |   |   | 2 |
| AKAP3    |   |  |   | 1 |   | 1 | 2 |
| AKAP8    |   |  | 1 | 1 |   |   | 2 |
| AKNA     |   |  | 1 | 1 |   |   | 2 |
| ALCAM    |   |  | 1 | 1 |   |   | 2 |
| ALDH1A2  | 1 |  |   | 1 |   |   | 2 |
| ALG10B   |   |  | 1 | 1 |   |   | 2 |
| ALS2CL   |   |  | 1 | 1 |   |   | 2 |
| ALX4     |   |  | 1 | 1 |   |   | 2 |
| ANGPTL7  |   |  | 1 | 1 |   |   | 2 |
| ANK1     |   |  | 1 | 1 |   |   | 2 |
| ANKFY1   |   |  | 1 | 1 |   |   | 2 |
| ANKS6    | 1 |  | 1 |   |   |   | 2 |
| ANPEP    |   |  |   | 1 |   | 1 | 2 |
| AP2S1    |   |  |   | 1 |   | 1 | 2 |
| AP3D1    | 1 |  |   | 1 |   |   | 2 |
| APBB1IP  |   |  |   | 1 |   | 1 | 2 |
| APBB2    |   |  | 1 | 1 |   |   | 2 |
| APOL2    |   |  |   | 1 | 1 |   | 2 |
| APOL6    |   |  | 1 | 1 |   |   | 2 |
| APTX     | 1 |  |   | 1 |   |   | 2 |
| AQP10    |   |  |   | 1 |   | 1 | 2 |
| AQP6     |   |  | 1 | 1 |   |   | 2 |
| ARHGEF17 |   |  |   | 1 | 1 |   | 2 |
| ARL10    |   |  | 1 | 1 |   |   | 2 |
| ARL3     |   |  | 1 | 1 |   |   | 2 |
| ARMC7    |   |  | 1 | 1 |   |   | 2 |

|           |   |  |   |   |   |     |
|-----------|---|--|---|---|---|-----|
| ARRB1     | 1 |  |   | 1 |   | 2   |
| ASXL1     |   |  | 1 | 1 |   | 2   |
| ATCAY     |   |  |   | 1 | 1 | 2   |
| ATG7      |   |  |   | 1 |   | 1 2 |
| ATM       |   |  | 1 | 1 |   | 2   |
| ATP10B    |   |  | 1 | 1 |   | 2   |
| ATP1A2    |   |  | 1 | 1 |   | 2   |
| ATP2B2    |   |  | 1 | 1 |   | 2   |
| ATP6V0E1  |   |  |   | 1 |   | 1 2 |
| ATP6V0E2  |   |  |   | 1 | 1 | 2   |
| ATP6V1C1  |   |  | 1 | 1 |   | 2   |
| ATPIF1    |   |  | 1 | 1 |   | 2   |
| ATXN7L3   |   |  | 1 | 1 |   | 2   |
| B3GAT1    | 1 |  |   | 1 |   | 2   |
| B3GNT8    |   |  |   | 1 |   | 1 2 |
| B4GALT2   | 1 |  |   | 1 |   | 2   |
| B4GALT5   |   |  | 1 | 1 |   | 2   |
| BAD       |   |  |   | 1 |   | 1 2 |
| BAHCC1    |   |  | 1 | 1 |   | 2   |
| BAIAP3    |   |  |   | 1 |   | 1 2 |
| BANP      |   |  | 1 | 1 |   | 2   |
| BAT4      | 1 |  |   |   |   | 1 2 |
| BBS10     | 1 |  |   | 1 |   | 2   |
| BCL11B    |   |  | 1 | 1 |   | 2   |
| BCL2L15   |   |  | 1 | 1 |   | 2   |
| BCR       |   |  |   | 1 | 1 | 2   |
| BIN2      |   |  |   | 1 | 1 | 2   |
| BMP8A     |   |  | 1 | 1 |   | 2   |
| BSDC1     | 1 |  |   | 1 |   | 2   |
| BSN       |   |  | 1 | 1 |   | 2   |
| BTBD14B   |   |  | 1 | 1 |   | 2   |
| BTBD9     |   |  | 1 | 1 |   | 2   |
| C10orf132 |   |  | 1 | 1 |   | 2   |
| C10orf33  | 1 |  |   |   |   | 1 2 |
| C10orf47  |   |  | 1 | 1 |   | 2   |
| C10orf55  |   |  | 1 | 1 |   | 2   |
| C11orf41  |   |  | 1 | 1 |   | 2   |
| C11orf80  |   |  |   | 1 |   | 1 2 |
| C12orf59  |   |  | 1 | 1 |   | 2   |
| C14orf4   |   |  | 1 | 1 |   | 2   |
| C15orf2   |   |  | 1 | 1 |   | 2   |

|          |   |   |   |   |   |   |   |
|----------|---|---|---|---|---|---|---|
| C15orf39 | 1 |   |   | 1 |   | 2 |   |
| C16orf71 |   |   |   | 1 | 1 | 2 |   |
| C17orf39 |   |   | 1 | 1 |   | 2 |   |
| C17orf60 |   |   |   | 1 | 1 | 2 |   |
| C17orf63 |   |   | 1 | 1 |   | 2 |   |
| C18orf1  |   |   | 1 | 1 |   | 2 |   |
| C19orf10 |   |   | 1 | 1 |   | 2 |   |
| C19orf19 |   |   |   | 1 | 1 | 2 |   |
| C1orf107 |   |   | 1 | 1 |   | 2 |   |
| C1orf116 |   |   | 1 | 1 |   | 2 |   |
| C1orf151 |   |   | 1 | 1 |   | 2 |   |
| C1orf183 |   |   | 1 | 1 |   | 2 |   |
| C21orf2  |   |   | 1 | 1 |   | 2 |   |
| C21orf29 |   |   | 1 | 1 |   | 2 |   |
| C22orf13 |   |   | 1 | 1 |   | 2 |   |
| C3orf64  |   |   | 1 | 1 |   | 2 |   |
| C4orf36  |   |   |   | 1 | 1 | 2 |   |
| C5orf38  |   |   |   |   | 1 | 1 | 2 |
| C6orf106 | 1 |   |   | 1 |   | 2 |   |
| C7orf41  |   |   | 1 | 1 |   | 2 |   |
| C7orf43  |   |   | 1 | 1 |   | 2 |   |
| C7orf50  |   | 1 |   | 1 |   | 2 |   |
| C9orf100 | 1 |   |   | 1 |   | 2 |   |
| C9orf116 |   |   |   | 1 | 1 | 2 |   |
| C9orf164 |   |   |   | 1 | 1 | 2 |   |
| C9orf47  | 1 |   |   | 1 |   | 2 |   |
| C9orf58  |   |   | 1 | 1 |   | 2 |   |
| C9orf75  |   |   |   | 1 | 1 | 2 |   |
| CA12     |   |   |   | 1 | 1 | 2 |   |
| CA5B     |   |   | 1 | 1 |   | 2 |   |
| CABLES2  |   |   |   | 1 | 1 | 2 |   |
| CACNA1B  |   |   | 1 | 1 |   | 2 |   |
| CACNA1H  |   |   |   | 1 | 1 | 2 |   |
| CACNA2D4 |   |   | 1 | 1 |   | 2 |   |
| CACYBP   |   |   | 1 | 1 |   | 2 |   |
| CAMK2G   |   |   | 1 | 1 |   | 2 |   |
| CANT1    |   |   |   | 1 | 1 | 2 |   |
| CAPS     |   |   | 1 | 1 |   | 2 |   |
| CBL      |   |   | 1 | 1 |   | 2 |   |
| CCDC113  |   |   | 1 | 1 |   | 2 |   |
| CCDC120  |   |   | 1 | 1 |   | 2 |   |

|          |   |  |   |   |   |   |   |
|----------|---|--|---|---|---|---|---|
| CCDC134  |   |  |   | 1 |   | 1 | 2 |
| CCDC149  |   |  | 1 | 1 |   |   | 2 |
| CCDC39   |   |  |   | 1 | 1 |   | 2 |
| CCDC4    |   |  |   | 1 | 1 |   | 2 |
| CCDC48   |   |  |   | 1 |   | 1 | 2 |
| CCDC81   |   |  |   | 1 |   | 1 | 2 |
| CCDC88A  |   |  | 1 | 1 |   |   | 2 |
| CCKBR    |   |  | 1 | 1 |   |   | 2 |
| CCND2    |   |  | 1 | 1 |   |   | 2 |
| CCT5     |   |  | 1 | 1 |   |   | 2 |
| CD109    |   |  | 1 | 1 |   |   | 2 |
| CD151    |   |  |   | 1 |   | 1 | 2 |
| CD180    |   |  | 1 | 1 |   |   | 2 |
| CD1E     |   |  | 1 | 1 |   |   | 2 |
| CD244    |   |  | 1 | 1 |   |   | 2 |
| CD5L     |   |  |   | 1 |   | 1 | 2 |
| CD7      |   |  |   | 1 |   | 1 | 2 |
| CD74     |   |  |   | 1 | 1 |   | 2 |
| CDC34    |   |  |   | 1 |   | 1 | 2 |
| CDC42BPA |   |  | 1 | 1 |   |   | 2 |
| CDC42EP3 |   |  |   | 1 | 1 |   | 2 |
| CDC42SE2 |   |  |   | 1 | 1 |   | 2 |
| CDCP1    |   |  | 1 | 1 |   |   | 2 |
| CDH2     | 1 |  |   | 1 |   |   | 2 |
| CDH23    |   |  | 1 | 1 |   |   | 2 |
| CDKN2A   |   |  | 1 | 1 |   |   | 2 |
| CDKN2A   |   |  | 1 |   |   | 1 | 2 |
| CDR2L    |   |  | 1 | 1 |   |   | 2 |
| CEBPD    |   |  |   | 1 | 1 |   | 2 |
| CECR2    |   |  |   | 1 | 1 |   | 2 |
| CENTA2   | 1 |  |   | 1 |   |   | 2 |
| CEP63    |   |  | 1 | 1 |   |   | 2 |
| CHERP    |   |  |   | 1 | 1 |   | 2 |
| CHRM1    | 1 |  |   | 1 |   |   | 2 |
| CHRNA4   |   |  |   | 1 | 1 |   | 2 |
| CLASP1   |   |  | 1 | 1 |   |   | 2 |
| CLASP2   |   |  | 1 | 1 |   |   | 2 |
| CLCN6    |   |  | 1 | 1 |   |   | 2 |
| CLDN1    | 1 |  |   | 1 |   |   | 2 |
| CLDN15   |   |  |   | 1 |   | 1 | 2 |
| CLDN2    |   |  | 1 | 1 |   |   | 2 |

|         |   |  |   |   |   |   |   |
|---------|---|--|---|---|---|---|---|
| CLEC11A |   |  |   | 1 | 1 |   | 2 |
| CLEC16A |   |  |   | 1 | 1 |   | 2 |
| CLIC4   |   |  |   | 1 | 1 |   | 2 |
| CLOCK   |   |  | 1 | 1 |   |   | 2 |
| CLRN1   |   |  | 1 | 1 |   |   | 2 |
| CMIP    |   |  |   | 1 | 1 |   | 2 |
| CMTM4   |   |  | 1 | 1 |   |   | 2 |
| CNGB1   |   |  |   | 1 |   | 1 | 2 |
| CNN2    |   |  |   | 1 |   | 1 | 2 |
| CNNM2   |   |  |   | 1 | 1 |   | 2 |
| CNOT8   |   |  | 1 | 1 |   |   | 2 |
| CNP     |   |  | 1 | 1 |   |   | 2 |
| CNPY1   |   |  |   | 1 | 1 |   | 2 |
| COL1A1  |   |  | 1 | 1 |   |   | 2 |
| COL7A1  | 1 |  |   | 1 |   |   | 2 |
| COQ4    |   |  |   | 1 |   | 1 | 2 |
| COX18   | 1 |  |   | 1 |   |   | 2 |
| COX19   |   |  | 1 | 1 |   |   | 2 |
| COX8A   |   |  |   | 1 |   | 1 | 2 |
| CPNE7   |   |  |   | 1 |   | 1 | 2 |
| CRIM1   |   |  |   | 1 | 1 |   | 2 |
| CRIP2   |   |  |   | 1 | 1 |   | 2 |
| CRKL    |   |  | 1 | 1 |   |   | 2 |
| CRTAP   |   |  | 1 | 1 |   |   | 2 |
| CRTC3   |   |  | 1 | 1 |   |   | 2 |
| CSDC2   |   |  | 1 | 1 |   |   | 2 |
| CSF2    | 1 |  |   | 1 |   |   | 2 |
| CSMD1   |   |  |   | 1 | 1 |   | 2 |
| CTDSPL  |   |  | 1 | 1 |   |   | 2 |
| CTF8    | 1 |  |   | 1 |   |   | 2 |
| CTRB1   |   |  |   |   | 1 | 1 | 2 |
| CUEDC1  |   |  |   | 1 |   | 1 | 2 |
| CUGBP2  |   |  | 1 | 1 |   |   | 2 |
| CWF19L2 |   |  | 1 | 1 |   |   | 2 |
| CYP11B1 |   |  | 1 | 1 |   |   | 2 |
| CYP11B2 |   |  | 1 | 1 |   |   | 2 |
| CYP20A1 |   |  | 1 | 1 |   |   | 2 |
| CYYR1   |   |  | 1 | 1 |   |   | 2 |
| DAK     |   |  |   | 1 | 1 |   | 2 |
| DBT     |   |  | 1 | 1 |   |   | 2 |
| DCTN1   |   |  |   | 1 |   | 1 | 2 |

|              |   |  |   |   |  |   |   |
|--------------|---|--|---|---|--|---|---|
| DCX          |   |  | 1 | 1 |  |   | 2 |
| DDB1         |   |  | 1 | 1 |  |   | 2 |
| DDEF1        |   |  | 1 | 1 |  |   | 2 |
| DEFB126      |   |  |   | 1 |  | 1 | 2 |
| DENND4C      |   |  | 1 | 1 |  |   | 2 |
| DERL1        |   |  | 1 | 1 |  |   | 2 |
| DFNA5        |   |  | 1 | 1 |  |   | 2 |
| DGCR2        |   |  |   | 1 |  | 1 | 2 |
| DGKQ         |   |  |   | 1 |  | 1 | 2 |
| DHRS3        |   |  |   | 1 |  | 1 | 2 |
| DIO2         |   |  | 1 | 1 |  |   | 2 |
| DKFZP566E164 |   |  | 1 | 1 |  |   | 2 |
| DLGAP2       |   |  | 1 | 1 |  |   | 2 |
| DLGAP4       | 1 |  |   | 1 |  |   | 2 |
| DNAJB2       | 1 |  |   | 1 |  |   | 2 |
| DNAJC11      |   |  | 1 | 1 |  |   | 2 |
| DNAJC5       |   |  | 1 | 1 |  |   | 2 |
| DNAL4        |   |  | 1 | 1 |  |   | 2 |
| DOC2A        |   |  |   | 1 |  | 1 | 2 |
| DOLPP1       |   |  | 1 | 1 |  |   | 2 |
| DPP9         |   |  | 1 | 1 |  |   | 2 |
| DPY19L4      |   |  | 1 | 1 |  |   | 2 |
| DPYSL3       |   |  | 1 | 1 |  |   | 2 |
| DSCR9        |   |  |   | 1 |  | 1 | 2 |
| DSG2         |   |  |   | 1 |  | 1 | 2 |
| DTX3         |   |  |   | 1 |  | 1 | 2 |
| DTX4         |   |  | 1 | 1 |  |   | 2 |
| DUOX2        |   |  | 1 | 1 |  |   | 2 |
| DUSP19       |   |  | 1 | 1 |  |   | 2 |
| DUSP9        |   |  | 1 | 1 |  |   | 2 |
| DVL3         |   |  | 1 | 1 |  |   | 2 |
| E2F4         |   |  |   | 1 |  | 1 | 2 |
| E2F7         |   |  | 1 | 1 |  |   | 2 |
| EBF1         |   |  | 1 | 1 |  |   | 2 |
| ECHS1        |   |  |   | 1 |  | 1 | 2 |
| EDARADD      |   |  | 1 | 1 |  |   | 2 |
| EDG3         |   |  | 1 | 1 |  |   | 2 |
| EDG6         |   |  |   | 1 |  | 1 | 2 |
| EGFL7        |   |  |   | 1 |  | 1 | 2 |
| EGR1         |   |  | 1 | 1 |  |   | 2 |
| EGR2         | 1 |  |   | 1 |  |   | 2 |

|          |   |  |   |   |   |   |   |
|----------|---|--|---|---|---|---|---|
| EHMT1    |   |  |   | 1 | 1 |   | 2 |
| EIF2B3   |   |  | 1 | 1 |   |   | 2 |
| EIF2C1   | 1 |  |   | 1 |   |   | 2 |
| ELAVL3   | 1 |  |   | 1 |   |   | 2 |
| ELFN2    |   |  |   | 1 | 1 |   | 2 |
| ELOVL2   |   |  |   | 1 | 1 |   | 2 |
| ELOVL5   | 1 |  |   | 1 |   |   | 2 |
| ELOVL7   |   |  | 1 | 1 |   |   | 2 |
| EMILIN1  |   |  |   | 1 |   | 1 | 2 |
| EML1     |   |  |   | 1 | 1 |   | 2 |
| EMP1     |   |  | 1 | 1 |   |   | 2 |
| EMX2     |   |  |   | 1 | 1 |   | 2 |
| ENTPD1   |   |  | 1 | 1 |   |   | 2 |
| EP400    |   |  | 1 | 1 |   |   | 2 |
| EPB41L1  |   |  | 1 | 1 |   |   | 2 |
| EPB41L5  |   |  | 1 | 1 |   |   | 2 |
| EPHB2    |   |  | 1 | 1 |   |   | 2 |
| EPS8L1   |   |  |   | 1 |   | 1 | 2 |
| ERLIN2   |   |  | 1 | 1 |   |   | 2 |
| ERRFI1   |   |  | 1 | 1 |   |   | 2 |
| ETV6     |   |  |   | 1 | 1 |   | 2 |
| EVC      |   |  | 1 | 1 |   |   | 2 |
| EVI1     |   |  | 1 | 1 |   |   | 2 |
| EVI5L    |   |  |   | 1 | 1 |   | 2 |
| EVL      |   |  |   | 1 |   | 1 | 2 |
| EVX1     |   |  |   | 1 |   | 1 | 2 |
| EXOSC5   |   |  |   | 1 |   | 1 | 2 |
| EXTL3    |   |  | 1 | 1 |   |   | 2 |
| EZH1     |   |  | 1 | 1 |   |   | 2 |
| F13A1    | 1 |  |   | 1 |   |   | 2 |
| F8       |   |  | 1 | 1 |   |   | 2 |
| FAAH     |   |  |   | 1 |   | 1 | 2 |
| FAM108A1 |   |  |   |   | 1 | 1 | 2 |
| FAM116A  |   |  | 1 | 1 |   |   | 2 |
| FAM120C  |   |  |   | 1 | 1 |   | 2 |
| FAM125B  |   |  | 1 | 1 |   |   | 2 |
| FAM129A  |   |  | 1 | 1 |   |   | 2 |
| FAM13A1  |   |  | 1 | 1 |   |   | 2 |
| FAM152A  | 1 |  |   | 1 |   |   | 2 |
| FAM19A5  |   |  | 1 | 1 |   |   | 2 |
| FAM20B   |   |  | 1 | 1 |   |   | 2 |

|          |   |  |   |   |   |   |   |
|----------|---|--|---|---|---|---|---|
| FAM46A   |   |  | 1 | 1 |   |   | 2 |
| FAM53B   |   |  | 1 | 1 |   |   | 2 |
| FAM84A   |   |  | 1 | 1 |   |   | 2 |
| FANCA    |   |  |   | 1 |   | 1 | 2 |
| FARP1    |   |  |   | 1 |   | 1 | 2 |
| FBXL18   |   |  |   | 1 | 1 |   | 2 |
| FBXL19   |   |  | 1 | 1 |   |   | 2 |
| FBXO2    |   |  |   | 1 |   | 1 | 2 |
| FBXO21   |   |  | 1 | 1 |   |   | 2 |
| FBXO24   |   |  |   | 1 |   | 1 | 2 |
| FBXO27   |   |  | 1 | 1 |   |   | 2 |
| FBXO30   |   |  |   | 1 | 1 |   | 2 |
| FBXO33   |   |  | 1 | 1 |   |   | 2 |
| FBXO36   |   |  | 1 | 1 |   |   | 2 |
| FBXW2    |   |  | 1 | 1 |   |   | 2 |
| FBXW5    |   |  |   | 1 |   | 1 | 2 |
| FCHSD1   | 1 |  |   | 1 |   |   | 2 |
| FDXR     |   |  |   | 1 |   | 1 | 2 |
| FGD1     |   |  |   | 1 | 1 |   | 2 |
| FGD2     |   |  |   | 1 |   | 1 | 2 |
| FGF23    |   |  | 1 | 1 |   |   | 2 |
| FGFR3    |   |  | 1 | 1 |   |   | 2 |
| FIZ1     |   |  | 1 | 1 |   |   | 2 |
| FKTN     |   |  | 1 | 1 |   |   | 2 |
| FLJ20160 |   |  | 1 | 1 |   |   | 2 |
| FLJ25404 |   |  |   | 1 | 1 |   | 2 |
| FLJ37464 |   |  |   | 1 | 1 |   | 2 |
| FLJ39743 |   |  | 1 | 1 |   |   | 2 |
| FLRT1    |   |  | 1 | 1 |   |   | 2 |
| FLT3LG   |   |  |   | 1 |   | 1 | 2 |
| FLYWCH1  |   |  | 1 | 1 |   |   | 2 |
| FMNL1    |   |  |   | 1 |   | 1 | 2 |
| FMNL3    |   |  | 1 | 1 |   |   | 2 |
| FN3K     |   |  |   | 1 | 1 |   | 2 |
| FNBP1L   |   |  | 1 | 1 |   |   | 2 |
| FOXJ3    |   |  | 1 | 1 |   |   | 2 |
| FOXK1    |   |  | 1 | 1 |   |   | 2 |
| FOXL1    |   |  | 1 | 1 |   |   | 2 |
| FOXO3    |   |  | 1 | 1 |   |   | 2 |
| FOXP4    |   |  | 1 | 1 |   |   | 2 |
| FOXRED1  |   |  |   | 1 |   | 1 | 2 |



|         |   |  |   |   |   |   |
|---------|---|--|---|---|---|---|
| FRAT1   |   |  | 1 | 1 |   | 2 |
| FRMD1   |   |  |   | 1 | 1 | 2 |
| FSCN1   |   |  |   | 1 | 1 | 2 |
| FURIN   |   |  |   | 1 | 1 | 2 |
| FUT4    |   |  |   | 1 | 1 | 2 |
| FZD4    |   |  |   | 1 | 1 | 2 |
| G6PD    |   |  |   | 1 | 1 | 2 |
| GABBR2  | 1 |  |   | 1 |   | 2 |
| GABRD   |   |  |   | 1 | 1 | 2 |
| GABRE   | 1 |  |   | 1 |   | 2 |
| GADD45B |   |  |   | 1 | 1 | 2 |
| GAN     |   |  | 1 | 1 |   | 2 |
| GATAD2A |   |  | 1 | 1 |   | 2 |
| GATAD2B |   |  | 1 | 1 |   | 2 |
| GBL     |   |  |   | 1 | 1 | 2 |
| GCDH    |   |  |   | 1 | 1 | 2 |
| GCN1L1  |   |  | 1 | 1 |   | 2 |
| GFOD1   |   |  |   | 1 | 1 | 2 |
| GHR     |   |  | 1 | 1 |   | 2 |
| GHRH    |   |  |   | 1 | 1 | 2 |
| GIGYF1  |   |  | 1 | 1 |   | 2 |
| GINS1   |   |  | 1 | 1 |   | 2 |
| GIPC3   |   |  | 1 | 1 |   | 2 |
| GIT2    |   |  | 1 | 1 |   | 2 |
| GJA1    |   |  | 1 | 1 |   | 2 |
| GJB1    |   |  |   | 1 | 1 | 2 |
| GJC2    |   |  | 1 | 1 |   | 2 |
| GLIPR1  |   |  | 1 | 1 |   | 2 |
| GLT25D2 |   |  | 1 | 1 |   | 2 |
| GM2A    |   |  | 1 | 1 |   | 2 |
| GNA12   |   |  | 1 | 1 |   | 2 |
| GNG13   |   |  |   | 1 | 1 | 2 |
| GNG2    |   |  | 1 | 1 |   | 2 |
| GNG4    |   |  | 1 | 1 |   | 2 |
| GOSR1   |   |  | 1 | 1 |   | 2 |
| GOT1    |   |  | 1 | 1 |   | 2 |
| GPC1    |   |  |   | 1 | 1 | 2 |
| GPC5    | 1 |  | 1 |   |   | 2 |
| GPR1    |   |  | 1 | 1 |   | 2 |
| GPR116  |   |  | 1 | 1 |   | 2 |
| GPR26   |   |  | 1 | 1 |   | 2 |

|             |   |  |   |   |   |   |   |
|-------------|---|--|---|---|---|---|---|
| GPR61       |   |  |   | 1 | 1 |   | 2 |
| GPR83       |   |  | 1 | 1 |   |   | 2 |
| GPR88       |   |  | 1 | 1 |   |   | 2 |
| GPRIN2      |   |  |   | 1 |   | 1 | 2 |
| GRAMD2      |   |  | 1 | 1 |   |   | 2 |
| GRAMD4      | 1 |  |   | 1 |   |   | 2 |
| GRASP       |   |  |   | 1 |   | 1 | 2 |
| GRB2        |   |  | 1 | 1 |   |   | 2 |
| GRB7        |   |  |   | 1 |   | 1 | 2 |
| GREM2       |   |  |   | 1 | 1 |   | 2 |
| GRIN2C      |   |  |   | 1 |   | 1 | 2 |
| GRLF1       |   |  |   | 1 | 1 |   | 2 |
| GSG1        |   |  | 1 | 1 |   |   | 2 |
| GTF3C2      |   |  | 1 | 1 |   |   | 2 |
| GTPBP3      |   |  |   | 1 |   | 1 | 2 |
| GYPA        | 1 |  | 1 |   |   |   | 2 |
| H2AFY2      |   |  | 1 | 1 |   |   | 2 |
| H6PD        |   |  | 1 | 1 |   |   | 2 |
| HAAO        |   |  |   | 1 |   | 1 | 2 |
| hCG_1776018 |   |  |   | 1 |   | 1 | 2 |
| HCN2        |   |  |   | 1 |   | 1 | 2 |
| HDAC10      |   |  |   | 1 |   | 1 | 2 |
| HDGF        |   |  |   | 1 |   | 1 | 2 |
| HEYL        |   |  | 1 | 1 |   |   | 2 |
| HIC1        |   |  |   | 1 |   | 1 | 2 |
| HIF3A       |   |  |   | 1 | 1 |   | 2 |
| HIST1H2BI   |   |  |   | 1 | 1 |   | 2 |
| HIVEP2      | 1 |  |   | 1 |   |   | 2 |
| HN1L        |   |  | 1 | 1 |   |   | 2 |
| HNT         |   |  | 1 | 1 |   |   | 2 |
| HOXA3       |   |  | 1 | 1 |   |   | 2 |
| HOXA7       |   |  |   | 1 |   | 1 | 2 |
| HPCA        |   |  |   | 1 | 1 |   | 2 |
| HSD17B12    |   |  | 1 | 1 |   |   | 2 |
| HSDL1       |   |  | 1 | 1 |   |   | 2 |
| HSPA12A     |   |  | 1 | 1 |   |   | 2 |
| HSPC159     |   |  | 1 | 1 |   |   | 2 |
| HTR4        |   |  | 1 | 1 |   |   | 2 |
| HTR6        |   |  |   | 1 |   | 1 | 2 |
| HTT         |   |  | 1 | 1 |   |   | 2 |
| HYAL2       | 1 |  |   | 1 |   |   | 2 |

|          |   |  |   |   |   |   |   |
|----------|---|--|---|---|---|---|---|
| HYOU1    |   |  |   | 1 | 1 |   | 2 |
| ICAM1    |   |  | 1 | 1 |   |   | 2 |
| ICAM4    |   |  | 1 | 1 |   |   | 2 |
| ICHTHYIN |   |  | 1 | 1 |   |   | 2 |
| ICMT     |   |  |   | 1 | 1 |   | 2 |
| ICOSLG   |   |  |   | 1 | 1 |   | 2 |
| IFIT2    |   |  | 1 | 1 |   |   | 2 |
| IGF1R    |   |  |   | 1 | 1 |   | 2 |
| IGFBP5   |   |  | 1 | 1 |   |   | 2 |
| IGLL1    |   |  |   |   | 1 | 1 | 2 |
| IGSF8    |   |  |   | 1 |   | 1 | 2 |
| IGSF9B   |   |  | 1 | 1 |   |   | 2 |
| IKBKG    |   |  |   |   | 1 | 1 | 2 |
| IL10     | 1 |  |   | 1 |   |   | 2 |
| IL13     |   |  | 1 | 1 |   |   | 2 |
| IL17A    |   |  |   | 1 | 1 |   | 2 |
| IL22RA2  |   |  | 1 | 1 |   |   | 2 |
| IL2RB    |   |  |   | 1 | 1 |   | 2 |
| IL32     |   |  |   | 1 |   | 1 | 2 |
| IMPAD1   |   |  | 1 | 1 |   |   | 2 |
| INA      |   |  | 1 | 1 |   |   | 2 |
| INPP5B   |   |  | 1 | 1 |   |   | 2 |
| INSL3    |   |  |   | 1 | 1 |   | 2 |
| INTS1    |   |  |   | 1 | 1 |   | 2 |
| IPO9     |   |  | 1 | 1 |   |   | 2 |
| IQCD     |   |  |   | 1 |   | 1 | 2 |
| IQCK     |   |  |   | 1 | 1 |   | 2 |
| IRF4     |   |  | 1 | 1 |   |   | 2 |
| ISLR2    |   |  |   |   | 1 | 1 | 2 |
| ISX      |   |  | 1 | 1 |   |   | 2 |
| ITGB4    |   |  |   | 1 |   | 1 | 2 |
| ITIH5    |   |  | 1 | 1 |   |   | 2 |
| ITK      |   |  | 1 | 1 |   |   | 2 |
| ITPK1    |   |  | 1 | 1 |   |   | 2 |
| ITPKB    |   |  | 1 | 1 |   |   | 2 |
| JRK      |   |  | 1 | 1 |   |   | 2 |
| KCNC3    |   |  |   | 1 | 1 |   | 2 |
| KCNJ12   |   |  |   | 1 | 1 |   | 2 |
| KCNN4    |   |  |   | 1 |   | 1 | 2 |
| KCNS1    |   |  | 1 | 1 |   |   | 2 |
| KCTD12   | 1 |  | 1 |   |   |   | 2 |

|          |   |  |   |   |   |   |   |
|----------|---|--|---|---|---|---|---|
| KCTD13   |   |  |   | 1 |   | 1 | 2 |
| KCTD15   |   |  |   | 1 | 1 |   | 2 |
| KIAA0152 |   |  | 1 | 1 |   |   | 2 |
| KIAA0182 |   |  | 1 | 1 |   |   | 2 |
| KIAA0226 |   |  | 1 | 1 |   |   | 2 |
| KIAA0265 |   |  | 1 | 1 |   |   | 2 |
| KIAA0323 |   |  |   | 1 | 1 |   | 2 |
| KIAA0368 |   |  | 1 | 1 |   |   | 2 |
| KIAA0406 |   |  |   | 1 |   | 1 | 2 |
| KIAA0513 |   |  | 1 | 1 |   |   | 2 |
| KIAA0556 |   |  |   | 1 |   | 1 | 2 |
| KIAA0831 |   |  | 1 | 1 |   |   | 2 |
| KIAA1147 |   |  | 1 | 1 |   |   | 2 |
| KIAA1303 |   |  | 1 | 1 |   |   | 2 |
| KIAA1549 |   |  | 1 | 1 |   |   | 2 |
| KIAA1576 |   |  | 1 | 1 |   |   | 2 |
| KIAA1632 |   |  | 1 | 1 |   |   | 2 |
| KIAA1715 |   |  | 1 | 1 |   |   | 2 |
| KIAA1754 |   |  | 1 | 1 |   |   | 2 |
| KIAA1881 |   |  | 1 | 1 |   |   | 2 |
| KLHDC6   |   |  | 1 | 1 |   |   | 2 |
| KLHL14   |   |  | 1 | 1 |   |   | 2 |
| KLHL6    |   |  |   | 1 | 1 |   | 2 |
| KLK15    |   |  |   | 1 |   | 1 | 2 |
| KLK2     |   |  | 1 | 1 |   |   | 2 |
| KLK3     |   |  | 1 | 1 |   |   | 2 |
| KLK6     |   |  |   | 1 |   | 1 | 2 |
| KPNA3    | 1 |  |   | 1 |   |   | 2 |
| KREMEN1  |   |  | 1 | 1 |   |   | 2 |
| KSR2     |   |  |   | 1 | 1 |   | 2 |
| LARP5    |   |  | 1 | 1 |   |   | 2 |
| LASS1    |   |  | 1 | 1 |   |   | 2 |
| LAT2     |   |  |   | 1 | 1 |   | 2 |
| LATS2    |   |  | 1 | 1 |   |   | 2 |
| LBX1     |   |  |   | 1 |   | 1 | 2 |
| LDHAL6B  |   |  |   | 1 |   | 1 | 2 |
| LDHD     |   |  |   | 1 | 1 |   | 2 |
| LDLR     |   |  |   | 1 | 1 |   | 2 |
| LEP      |   |  | 1 | 1 |   |   | 2 |
| LETM2    | 1 |  |   | 1 |   |   | 2 |
| LHB      |   |  |   | 1 |   | 1 | 2 |

|           |   |  |   |   |   |   |   |
|-----------|---|--|---|---|---|---|---|
| LHFPL4    |   |  | 1 | 1 |   |   | 2 |
| LIF       |   |  | 1 | 1 |   |   | 2 |
| LIMD2     |   |  | 1 | 1 |   |   | 2 |
| LMNB2     |   |  | 1 | 1 |   |   | 2 |
| LOC162073 |   |  | 1 | 1 |   |   | 2 |
| LOC26010  |   |  | 1 | 1 |   |   | 2 |
| LOC342897 |   |  | 1 | 1 |   |   | 2 |
| LOC399947 |   |  | 1 | 1 |   |   | 2 |
| LOC400451 |   |  | 1 | 1 |   |   | 2 |
| LOC652968 |   |  |   | 1 | 1 |   | 2 |
| LOC90379  | 1 |  |   | 1 |   |   | 2 |
| LONRF2    |   |  | 1 | 1 |   |   | 2 |
| LOXL2     |   |  | 1 | 1 |   |   | 2 |
| LPIN3     |   |  | 1 | 1 |   |   | 2 |
| LPL       | 1 |  |   | 1 |   |   | 2 |
| LRRC14    |   |  | 1 | 1 |   |   | 2 |
| LRRC57    |   |  | 1 | 1 |   |   | 2 |
| LSS       |   |  | 1 | 1 |   |   | 2 |
| LY6K      |   |  |   | 1 |   | 1 | 2 |
| LYPLA1    |   |  | 1 | 1 |   |   | 2 |
| LYRM7     |   |  | 1 | 1 |   |   | 2 |
| LZTS1     |   |  |   | 1 | 1 |   | 2 |
| MAFF      |   |  | 1 | 1 |   |   | 2 |
| MAFK      |   |  |   | 1 | 1 |   | 2 |
| MAG11     | 1 |  |   | 1 |   |   | 2 |
| MAGIX     |   |  |   | 1 |   | 1 | 2 |
| MAP3K3    | 1 |  |   | 1 |   |   | 2 |
| MAPK10    | 1 |  | 1 |   |   |   | 2 |
| MAPK11    |   |  |   | 1 | 1 |   | 2 |
| MAPK12    |   |  |   | 1 |   | 1 | 2 |
| MARK1     |   |  | 1 | 1 |   |   | 2 |
| MCART6    |   |  | 1 | 1 |   |   | 2 |
| MCAT      |   |  | 1 | 1 |   |   | 2 |
| MDGA1     |   |  |   | 1 |   | 1 | 2 |
| MED26     |   |  | 1 | 1 |   |   | 2 |
| MED9      |   |  | 1 | 1 |   |   | 2 |
| MEF2C     |   |  | 1 | 1 |   |   | 2 |
| MEF2D     |   |  | 1 | 1 |   |   | 2 |
| MEGF9     |   |  | 1 | 1 |   |   | 2 |
| METRNL    |   |  |   | 1 |   | 1 | 2 |
| MFN2      |   |  | 1 | 1 |   |   | 2 |

|          |   |  |   |   |   |   |
|----------|---|--|---|---|---|---|
| MGC21874 |   |  | 1 | 1 |   | 2 |
| MGC70857 |   |  |   | 1 | 1 | 2 |
| MID1IP1  |   |  |   | 1 | 1 | 2 |
| MIP      |   |  |   | 1 | 1 | 2 |
| MKL2     |   |  | 1 | 1 |   | 2 |
| MLC1     |   |  | 1 | 1 |   | 2 |
| MLLT6    |   |  | 1 | 1 |   | 2 |
| MLSTD2   |   |  | 1 | 1 |   | 2 |
| MLXIP    |   |  | 1 | 1 |   | 2 |
| MMAB     |   |  | 1 | 1 |   | 2 |
| MMP17    |   |  |   | 1 | 1 | 2 |
| MMP24    | 1 |  |   | 1 |   | 2 |
| MN1      |   |  | 1 | 1 |   | 2 |
| MNT      |   |  | 1 | 1 |   | 2 |
| MNX1     |   |  |   | 1 | 1 | 2 |
| MOBKL2C  |   |  |   | 1 | 1 | 2 |
| MOBP     |   |  |   | 1 | 1 | 2 |
| MOSPD2   |   |  | 1 | 1 |   | 2 |
| MPPED1   |   |  |   | 1 | 1 | 2 |
| MRPL4    | 1 |  |   | 1 |   | 2 |
| MRPL43   |   |  |   | 1 | 1 | 2 |
| MRPS25   |   |  | 1 | 1 |   | 2 |
| MTERF    |   |  | 1 | 1 |   | 2 |
| MTHFR    |   |  | 1 | 1 |   | 2 |
| MTHFSD   |   |  | 1 | 1 |   | 2 |
| MTMR3    |   |  | 1 | 1 |   | 2 |
| MTMR9    |   |  | 1 | 1 |   | 2 |
| MTP18    |   |  |   | 1 | 1 | 2 |
| MTR      |   |  | 1 | 1 |   | 2 |
| MTUS1    |   |  | 1 | 1 |   | 2 |
| MUC15    |   |  | 1 | 1 |   | 2 |
| MUC17    |   |  | 1 | 1 |   | 2 |
| MVD      |   |  |   | 1 | 1 | 2 |
| MXRA7    |   |  |   | 1 | 1 | 2 |
| MYADM    |   |  |   | 1 | 1 | 2 |
| MYH10    |   |  | 1 | 1 |   | 2 |
| MYH7B    |   |  |   | 1 | 1 | 2 |
| MYL9     |   |  |   | 1 | 1 | 2 |
| MYLK4    |   |  | 1 | 1 |   | 2 |
| MYO19    |   |  |   | 1 | 1 | 2 |
| MYO5C    |   |  | 1 | 1 |   | 2 |

|          |   |  |   |   |   |   |   |
|----------|---|--|---|---|---|---|---|
| MYO7B    |   |  |   | 1 |   | 1 | 2 |
| MYOM3    |   |  |   | 1 | 1 |   | 2 |
| MYT1     |   |  | 1 | 1 |   |   | 2 |
| N4BP2L1  |   |  | 1 | 1 |   |   | 2 |
| NADK     |   |  |   | 1 | 1 |   | 2 |
| NANOS2   |   |  |   | 1 | 1 |   | 2 |
| NAPA     |   |  |   | 1 |   | 1 | 2 |
| NARG1L   |   |  | 1 | 1 |   |   | 2 |
| NCAN     |   |  | 1 | 1 |   |   | 2 |
| NCLN     |   |  |   | 1 | 1 |   | 2 |
| NCOA3    |   |  | 1 | 1 |   |   | 2 |
| NDST1    |   |  | 1 | 1 |   |   | 2 |
| NDUFA4L2 |   |  |   | 1 |   | 1 | 2 |
| NECAB3   |   |  |   | 1 | 1 |   | 2 |
| NEDD4L   |   |  | 1 | 1 |   |   | 2 |
| NEUROG3  |   |  |   | 1 |   | 1 | 2 |
| NF1      |   |  | 1 | 1 |   |   | 2 |
| NFASC    |   |  |   | 1 | 1 |   | 2 |
| NFATC2   |   |  |   | 1 |   | 1 | 2 |
| NFIX     |   |  |   | 1 | 1 |   | 2 |
| NFKBIA   |   |  | 1 | 1 |   |   | 2 |
| NKX2-2   |   |  |   | 1 | 1 |   | 2 |
| NKX2-8   |   |  |   | 1 |   | 1 | 2 |
| NKX3-1   | 1 |  | 1 |   |   |   | 2 |
| NLGN2    |   |  | 1 | 1 |   |   | 2 |
| NMNAT2   |   |  | 1 | 1 |   |   | 2 |
| NMT1     |   |  | 1 | 1 |   |   | 2 |
| NMUR1    |   |  | 1 | 1 |   |   | 2 |
| NOL9     |   |  | 1 | 1 |   |   | 2 |
| NOM1     |   |  | 1 | 1 |   |   | 2 |
| NOS3     |   |  |   | 1 |   | 1 | 2 |
| NOTCH1   |   |  |   | 1 | 1 |   | 2 |
| NOTCH2   |   |  | 1 | 1 |   |   | 2 |
| NOTCH3   |   |  |   | 1 | 1 |   | 2 |
| NOTUM    |   |  |   | 1 |   | 1 | 2 |
| NOVA2    |   |  |   | 1 |   | 1 | 2 |
| NPTX1    |   |  | 1 | 1 |   |   | 2 |
| NPTXR    |   |  |   | 1 | 1 |   | 2 |
| NR3C1    |   |  | 1 | 1 |   |   | 2 |
| NRBP2    |   |  |   | 1 |   | 1 | 2 |
| NRP1     |   |  |   | 1 | 1 |   | 2 |

|          |   |  |   |   |   |   |   |
|----------|---|--|---|---|---|---|---|
| NSL1     |   |  | 1 | 1 |   |   | 2 |
| NSMCE2   |   |  |   | 1 |   | 1 | 2 |
| NTSR1    |   |  |   | 1 | 1 |   | 2 |
| NUAK2    |   |  | 1 | 1 |   |   | 2 |
| NUDT16   |   |  | 1 | 1 |   |   | 2 |
| NUP50    |   |  | 1 | 1 |   |   | 2 |
| NXN      |   |  |   | 1 |   | 1 | 2 |
| OAZ1     |   |  |   | 1 |   | 1 | 2 |
| ODF4     |   |  |   | 1 |   | 1 | 2 |
| ODZ1     |   |  | 1 | 1 |   |   | 2 |
| ODZ3     |   |  |   | 1 | 1 |   | 2 |
| OLA1     |   |  | 1 | 1 |   |   | 2 |
| OLFM3    |   |  | 1 | 1 |   |   | 2 |
| OLFML2A  |   |  |   | 1 | 1 |   | 2 |
| OSBP2    |   |  | 1 | 1 |   |   | 2 |
| OSBPL2   |   |  | 1 | 1 |   |   | 2 |
| OSR2     |   |  |   | 1 |   | 1 | 2 |
| OTOF     |   |  | 1 | 1 |   |   | 2 |
| OTP      | 1 |  |   | 1 |   |   | 2 |
| OTUB2    |   |  | 1 | 1 |   |   | 2 |
| OVOL1    |   |  | 1 | 1 |   |   | 2 |
| P15RS    | 1 |  |   | 1 |   |   | 2 |
| P2RY4    |   |  |   | 1 |   | 1 | 2 |
| PADI6    |   |  |   |   | 1 | 1 | 2 |
| PAPD5    |   |  | 1 | 1 |   |   | 2 |
| PAPLN    |   |  | 1 | 1 |   |   | 2 |
| PARK2    |   |  | 1 | 1 |   |   | 2 |
| PARVA    |   |  | 1 | 1 |   |   | 2 |
| PBRM1    |   |  | 1 | 1 |   |   | 2 |
| PCSK6    |   |  | 1 | 1 |   |   | 2 |
| PDCD11   |   |  |   | 1 |   | 1 | 2 |
| PDE4C    |   |  |   | 1 |   | 1 | 2 |
| PDE5A    |   |  | 1 | 1 |   |   | 2 |
| PDIK1L   | 1 |  |   | 1 |   |   | 2 |
| PDZK1IP1 |   |  |   | 1 |   | 1 | 2 |
| PEG10    |   |  | 1 | 1 |   |   | 2 |
| PER2     |   |  | 1 | 1 |   |   | 2 |
| PERLD1   |   |  | 1 | 1 |   |   | 2 |
| PES1     |   |  |   | 1 |   | 1 | 2 |
| PGRMC2   |   |  | 1 | 1 |   |   | 2 |
| PHF13    |   |  |   | 1 | 1 |   | 2 |



|          |   |  |   |   |   |   |   |
|----------|---|--|---|---|---|---|---|
| PHF15    |   |  | 1 | 1 |   |   | 2 |
| PHF21A   |   |  | 1 | 1 |   |   | 2 |
| PHF8     |   |  | 1 | 1 |   |   | 2 |
| PHGDH    |   |  |   | 1 |   | 1 | 2 |
| PHLDA1   |   |  | 1 | 1 |   |   | 2 |
| PI4KB    |   |  |   | 1 | 1 |   | 2 |
| PIM3     |   |  | 1 | 1 |   |   | 2 |
| PIP4K2A  |   |  | 1 | 1 |   |   | 2 |
| PIP4K2C  | 1 |  |   | 1 |   |   | 2 |
| PITPNM2  |   |  | 1 | 1 |   |   | 2 |
| PIWIL4   | 1 |  |   |   |   | 1 | 2 |
| PKIA     | 1 |  |   | 1 |   |   | 2 |
| PKLR     |   |  |   | 1 |   | 1 | 2 |
| PKNOX1   |   |  | 1 | 1 |   |   | 2 |
| PKP1     |   |  | 1 | 1 |   |   | 2 |
| PLA2G2F  |   |  |   | 1 | 1 |   | 2 |
| PLA2G6   |   |  | 1 | 1 |   |   | 2 |
| PLCD3    |   |  |   | 1 | 1 |   | 2 |
| PLCXD3   |   |  | 1 | 1 |   |   | 2 |
| PLD4     |   |  |   | 1 |   | 1 | 2 |
| PLEKHA7  |   |  |   | 1 | 1 |   | 2 |
| PLEKHG4B |   |  |   | 1 | 1 |   | 2 |
| PLEKHH1  |   |  | 1 | 1 |   |   | 2 |
| PLLP     |   |  | 1 | 1 |   |   | 2 |
| PLVAP    |   |  |   | 1 | 1 |   | 2 |
| PLXNB1   |   |  |   | 1 |   | 1 | 2 |
| PLXND1   |   |  | 1 | 1 |   |   | 2 |
| PNPLA2   |   |  |   |   | 1 | 1 | 2 |
| PODXL2   |   |  |   | 1 |   | 1 | 2 |
| POFUT1   |   |  | 1 | 1 |   |   | 2 |
| POGK     |   |  | 1 | 1 |   |   | 2 |
| POLQ     |   |  |   | 1 | 1 |   | 2 |
| POLR1C   |   |  |   | 1 |   | 1 | 2 |
| POLR2J   |   |  | 1 | 1 |   |   | 2 |
| POMT1    |   |  |   | 1 |   | 1 | 2 |
| POR      |   |  |   | 1 |   | 1 | 2 |
| POU3F2   |   |  |   | 1 |   | 1 | 2 |
| PPM1H    |   |  |   | 1 | 1 |   | 2 |
| PPP1R14B |   |  |   |   | 1 | 1 | 2 |
| PPP1R16B |   |  | 1 | 1 |   |   | 2 |
| PPP2R1B  |   |  | 1 | 1 |   |   | 2 |

|           |   |  |   |   |   |   |   |
|-----------|---|--|---|---|---|---|---|
| PRDX2     |   |  |   | 1 |   | 1 | 2 |
| PRKAB2    |   |  | 1 | 1 |   |   | 2 |
| PRKCA     |   |  | 1 | 1 |   |   | 2 |
| PROK1     |   |  | 1 | 1 |   |   | 2 |
| PRPH2     |   |  | 1 | 1 |   |   | 2 |
| PRR12     |   |  |   | 1 | 1 |   | 2 |
| PRR17     |   |  |   | 1 |   | 1 | 2 |
| PRR18     |   |  |   | 1 | 1 |   | 2 |
| PRRG1     |   |  | 1 | 1 |   |   | 2 |
| PRRG2     |   |  |   | 1 |   | 1 | 2 |
| PRSS8     |   |  |   | 1 |   | 1 | 2 |
| PRX       |   |  | 1 | 1 |   |   | 2 |
| PSCA      |   |  |   | 1 |   | 1 | 2 |
| PSCD1     |   |  | 1 | 1 |   |   | 2 |
| PSKH1     |   |  |   | 1 | 1 |   | 2 |
| PTCH1     |   |  | 1 | 1 |   |   | 2 |
| PTGFR     |   |  | 1 | 1 |   |   | 2 |
| PTGFRN    |   |  | 1 | 1 |   |   | 2 |
| PTK7      |   |  |   | 1 |   | 1 | 2 |
| PTP4A1    |   |  | 1 | 1 |   |   | 2 |
| PTPN5     | 1 |  |   | 1 |   |   | 2 |
| PTPRJ     |   |  | 1 | 1 |   |   | 2 |
| PTPRS     |   |  |   | 1 |   | 1 | 2 |
| PTPRT     |   |  | 1 | 1 |   |   | 2 |
| PVRL1     |   |  | 1 | 1 |   |   | 2 |
| PXT1      |   |  | 1 | 1 |   |   | 2 |
| QPRT      | 1 |  |   |   |   | 1 | 2 |
| R3HDML    |   |  |   | 1 |   | 1 | 2 |
| RAB11FIP2 |   |  | 1 | 1 |   |   | 2 |
| RAB11FIP4 |   |  | 1 | 1 |   |   | 2 |
| RAB22A    |   |  | 1 | 1 |   |   | 2 |
| RAB31     |   |  | 1 | 1 |   |   | 2 |
| RAB35     |   |  |   | 1 | 1 |   | 2 |
| RAB8B     |   |  | 1 | 1 |   |   | 2 |
| RAC1      | 1 |  |   | 1 |   |   | 2 |
| RAI1      | 1 |  |   | 1 |   |   | 2 |
| RALBP1    |   |  | 1 | 1 |   |   | 2 |
| RAPGEF1   |   |  | 1 | 1 |   |   | 2 |
| RARA      |   |  | 1 | 1 |   |   | 2 |
| RARRES3   |   |  |   | 1 |   | 1 | 2 |
| RASGEF1A  |   |  | 1 | 1 |   |   | 2 |

|              |   |  |   |   |   |   |
|--------------|---|--|---|---|---|---|
| RASL12       | 1 |  |   | 1 |   | 2 |
| RASSF4       |   |  |   | 1 | 1 | 2 |
| RASSF5       |   |  | 1 | 1 |   | 2 |
| RBBP9        |   |  | 1 | 1 |   | 2 |
| RBCK1        | 1 |  |   | 1 |   | 2 |
| RBM17        |   |  | 1 | 1 |   | 2 |
| RCC2         |   |  |   | 1 | 1 | 2 |
| REPS2        |   |  | 1 | 1 |   | 2 |
| RER1         |   |  | 1 | 1 |   | 2 |
| RERE         |   |  | 1 | 1 |   | 2 |
| REXO4        |   |  |   | 1 | 1 | 2 |
| RFNG         |   |  |   | 1 | 1 | 2 |
| RGMA         |   |  | 1 | 1 |   | 2 |
| RGS16        |   |  | 1 | 1 |   | 2 |
| RGS9         |   |  |   | 1 | 1 | 2 |
| RGS9BP       |   |  | 1 | 1 |   | 2 |
| RHBDL3       |   |  | 1 | 1 |   | 2 |
| RHOD         |   |  |   | 1 | 1 | 2 |
| RHOF         |   |  |   | 1 | 1 | 2 |
| RILPL1       |   |  | 1 | 1 |   | 2 |
| RIPK5        |   |  | 1 | 1 |   | 2 |
| RLBP1L1      |   |  | 1 | 1 |   | 2 |
| RNASEH1      |   |  | 1 | 1 |   | 2 |
| RND2         |   |  |   | 1 | 1 | 2 |
| RNF126       |   |  | 1 | 1 |   | 2 |
| RNF150       |   |  | 1 | 1 |   | 2 |
| RNF166       |   |  |   | 1 | 1 | 2 |
| RNF213       |   |  | 1 | 1 |   | 2 |
| RNF38        |   |  | 1 | 1 |   | 2 |
| RNMT         |   |  | 1 | 1 |   | 2 |
| ROBO1        |   |  | 1 | 1 |   | 2 |
| ROD1         |   |  | 1 | 1 |   | 2 |
| RP4-691N24.1 |   |  |   | 1 | 1 | 2 |
| RPL27A       |   |  | 1 | 1 |   | 2 |
| RPL28        |   |  | 1 | 1 |   | 2 |
| RPS19BP1     |   |  |   | 1 | 1 | 2 |
| RPS23        |   |  | 1 | 1 |   | 2 |
| RPS6KC1      |   |  | 1 | 1 |   | 2 |
| RPS6KL1      |   |  |   | 1 | 1 | 2 |
| RPUSD2       |   |  |   | 1 | 1 | 2 |
| RRP15        |   |  | 1 | 1 |   | 2 |

|         |   |  |   |   |   |   |
|---------|---|--|---|---|---|---|
| RTF1    | 1 |  |   | 1 |   | 2 |
| RUNDC1  |   |  | 1 | 1 |   | 2 |
| RUNX1   |   |  | 1 | 1 |   | 2 |
| RXRA    |   |  | 1 | 1 |   | 2 |
| RXRG    |   |  |   | 1 | 1 | 2 |
| S100A16 |   |  |   | 1 | 1 | 2 |
| SAMD12  |   |  | 1 | 1 |   | 2 |
| SARS2   |   |  |   | 1 | 1 | 2 |
| SART3   |   |  |   | 1 | 1 | 2 |
| SATB2   | 1 |  | 1 |   |   | 2 |
| SBF1    |   |  | 1 | 1 |   | 2 |
| SCAMP5  |   |  |   | 1 | 1 | 2 |
| SCARF1  |   |  | 1 | 1 |   | 2 |
| SCGB3A1 |   |  |   | 1 | 1 | 2 |
| SCN3B   |   |  | 1 | 1 |   | 2 |
| SCN4A   | 1 |  |   | 1 |   | 2 |
| SCN5A   |   |  | 1 | 1 |   | 2 |
| SCNN1A  | 1 |  | 1 |   |   | 2 |
| SCRT1   | 1 |  |   |   | 1 | 2 |
| SCUBE2  |   |  |   | 1 | 1 | 2 |
| SCYL1   |   |  |   | 1 | 1 | 2 |
| SDK1    |   |  | 1 | 1 |   | 2 |
| SEC14L2 |   |  | 1 | 1 |   | 2 |
| SEC61A1 |   |  | 1 | 1 |   | 2 |
| SEC61A2 |   |  |   | 1 | 1 | 2 |
| SECTM1  |   |  | 1 | 1 |   | 2 |
| SEMA5A  |   |  | 1 | 1 |   | 2 |
| SEMA7A  | 1 |  |   | 1 |   | 2 |
| SEPT9   |   |  | 1 | 1 |   | 2 |
| SERBP1  |   |  | 1 | 1 |   | 2 |
| SERTAD3 |   |  |   | 1 | 1 | 2 |
| SETDB1  |   |  |   | 1 | 1 | 2 |
| SFRP1   |   |  | 1 | 1 |   | 2 |
| SFXN5   |   |  | 1 | 1 |   | 2 |
| SGK269  |   |  |   | 1 | 1 | 2 |
| SGSM2   |   |  |   | 1 | 1 | 2 |
| SH3BP2  |   |  | 1 | 1 |   | 2 |
| SH3GL1  |   |  | 1 | 1 |   | 2 |
| SH3TC2  |   |  | 1 | 1 |   | 2 |
| SHANK1  |   |  |   | 1 | 1 | 2 |
| SHC2    |   |  |   | 1 | 1 | 2 |

|          |   |  |   |   |   |   |   |
|----------|---|--|---|---|---|---|---|
| SHE      |   |  | 1 | 1 |   |   | 2 |
| SHROOM2  |   |  |   | 1 | 1 |   | 2 |
| SIAE     |   |  |   | 1 | 1 |   | 2 |
| SIGLEC7  |   |  | 1 | 1 |   |   | 2 |
| SIKE     |   |  | 1 | 1 |   |   | 2 |
| SIM2     |   |  |   | 1 | 1 |   | 2 |
| SIX5     |   |  |   | 1 |   | 1 | 2 |
| SLC12A5  |   |  | 1 | 1 |   |   | 2 |
| SLC12A6  |   |  | 1 | 1 |   |   | 2 |
| SLC12A9  |   |  |   | 1 |   | 1 | 2 |
| SLC13A3  |   |  |   | 1 | 1 |   | 2 |
| SLC15A2  |   |  | 1 | 1 |   |   | 2 |
| SLC16A3  |   |  |   | 1 |   | 1 | 2 |
| SLC1A7   |   |  | 1 | 1 |   |   | 2 |
| SLC22A15 | 1 |  |   | 1 |   |   | 2 |
| SLC25A34 |   |  | 1 | 1 |   |   | 2 |
| SLC25A39 |   |  | 1 | 1 |   |   | 2 |
| SLC26A10 |   |  |   | 1 |   | 1 | 2 |
| SLC26A4  |   |  | 1 | 1 |   |   | 2 |
| SLC27A1  |   |  | 1 | 1 |   |   | 2 |
| SLC30A9  |   |  | 1 | 1 |   |   | 2 |
| SLC35B4  |   |  |   | 1 | 1 |   | 2 |
| SLC35C1  |   |  | 1 | 1 |   |   | 2 |
| SLC36A1  |   |  | 1 | 1 |   |   | 2 |
| SLC37A2  |   |  |   | 1 |   | 1 | 2 |
| SLC39A3  |   |  |   | 1 |   | 1 | 2 |
| SLC46A1  |   |  | 1 | 1 |   |   | 2 |
| SLC6A13  |   |  |   | 1 |   | 1 | 2 |
| SLC6A17  |   |  | 1 | 1 |   |   | 2 |
| SLC6A9   |   |  |   | 1 | 1 |   | 2 |
| SLC7A3   |   |  |   | 1 |   | 1 | 2 |
| SLC8A3   |   |  | 1 | 1 |   |   | 2 |
| SLC9A1   | 1 |  |   | 1 |   |   | 2 |
| SLC9A8   |   |  | 1 | 1 |   |   | 2 |
| SLFN11   |   |  | 1 | 1 |   |   | 2 |
| SLFN13   |   |  | 1 | 1 |   |   | 2 |
| SMAD2    |   |  | 1 | 1 |   |   | 2 |
| SMAD3    |   |  | 1 | 1 |   |   | 2 |
| SMAP2    |   |  | 1 | 1 |   |   | 2 |
| SMG1     |   |  | 1 | 1 |   |   | 2 |
| SMG7     |   |  | 1 | 1 |   |   | 2 |

|            |   |  |   |   |   |   |
|------------|---|--|---|---|---|---|
| SMOC1      | 1 |  |   | 1 |   | 2 |
| SMOC2      |   |  |   | 1 | 1 | 2 |
| SMPD3      |   |  | 1 | 1 |   | 2 |
| SMTN       |   |  |   | 1 | 1 | 2 |
| SNCG       |   |  |   | 1 | 1 | 2 |
| SNN        |   |  | 1 | 1 |   | 2 |
| SNPH       |   |  | 1 | 1 |   | 2 |
| SNTB2      |   |  | 1 | 1 |   | 2 |
| SNX15      |   |  |   | 1 | 1 | 2 |
| SNX21      |   |  | 1 | 1 |   | 2 |
| SNX26      |   |  |   | 1 | 1 | 2 |
| SOHLH1     |   |  |   | 1 | 1 | 2 |
| SOST       |   |  |   | 1 | 1 | 2 |
| SOX11      |   |  |   | 1 | 1 | 2 |
| SOX12      | 1 |  |   | 1 |   | 2 |
| SOX4       |   |  | 1 | 1 |   | 2 |
| SOX8       |   |  | 1 | 1 |   | 2 |
| SPATA2L    |   |  |   | 1 | 1 | 2 |
| SPDEF      |   |  |   | 1 | 1 | 2 |
| SPOCK1     |   |  | 1 | 1 |   | 2 |
| SPOCK2     |   |  |   | 1 | 1 | 2 |
| SPSB4      |   |  |   | 1 | 1 | 2 |
| SPTLC2     |   |  | 1 | 1 |   | 2 |
| SQSTM1     |   |  | 1 | 1 |   | 2 |
| SRA1       |   |  | 1 | 1 |   | 2 |
| SRPR       | 1 |  |   | 1 |   | 2 |
| SSH1       |   |  | 1 | 1 |   | 2 |
| SSR1       |   |  | 1 | 1 |   | 2 |
| SSTR1      |   |  | 1 | 1 |   | 2 |
| ST14       |   |  | 1 | 1 |   | 2 |
| ST6GALNAC3 | 1 |  |   | 1 |   | 2 |
| STAC       | 1 |  |   | 1 |   | 2 |
| STAT3      |   |  |   | 1 | 1 | 2 |
| STAU1      |   |  | 1 | 1 |   | 2 |
| STK19      | 1 |  |   |   | 1 | 2 |
| STMN3      |   |  |   | 1 | 1 | 2 |
| STS        |   |  | 1 | 1 |   | 2 |
| STUB1      |   |  |   | 1 | 1 | 2 |
| STX17      |   |  | 1 | 1 |   | 2 |
| STX1A      |   |  |   | 1 | 1 | 2 |
| STX3       |   |  | 1 | 1 |   | 2 |

|          |   |  |   |   |   |   |   |
|----------|---|--|---|---|---|---|---|
| SUSD4    |   |  | 1 | 1 |   |   | 2 |
| SUV420H2 |   |  |   | 1 |   | 1 | 2 |
| SYNGR3   |   |  | 1 | 1 |   |   | 2 |
| SYS1     | 1 |  |   |   |   | 1 | 2 |
| SYT13    |   |  | 1 | 1 |   |   | 2 |
| SYT6     |   |  | 1 | 1 |   |   | 2 |
| TACC1    |   |  | 1 | 1 |   |   | 2 |
| TAL1     |   |  | 1 | 1 |   |   | 2 |
| TANC2    |   |  | 1 | 1 |   |   | 2 |
| TAP2     | 1 |  | 1 |   |   |   | 2 |
| TATDN3   |   |  | 1 | 1 |   |   | 2 |
| TAX1BP3  |   |  |   | 1 | 1 |   | 2 |
| TBC1D10C |   |  |   | 1 |   | 1 | 2 |
| TBC1D14  |   |  |   | 1 | 1 |   | 2 |
| TBC1D24  |   |  |   | 1 | 1 |   | 2 |
| TBC1D5   |   |  | 1 | 1 |   |   | 2 |
| TBKBP1   | 1 |  |   | 1 |   |   | 2 |
| TBX2     | 1 |  |   | 1 |   |   | 2 |
| TBX6     |   |  |   | 1 |   | 1 | 2 |
| TCEA2    |   |  |   | 1 |   | 1 | 2 |
| TCF4     |   |  | 1 | 1 |   |   | 2 |
| TCN2     |   |  |   | 1 |   | 1 | 2 |
| TCOF1    |   |  |   | 1 |   | 1 | 2 |
| TEAD3    | 1 |  |   | 1 |   |   | 2 |
| TEGT     |   |  | 1 | 1 |   |   | 2 |
| TESK1    |   |  |   | 1 |   | 1 | 2 |
| TET3     |   |  | 1 | 1 |   |   | 2 |
| TEX261   |   |  |   | 1 | 1 |   | 2 |
| TFAP2A   |   |  |   | 1 |   | 1 | 2 |
| TFAP2B   |   |  | 1 | 1 |   |   | 2 |
| TGFA     |   |  | 1 | 1 |   |   | 2 |
| TGFBR3   |   |  | 1 | 1 |   |   | 2 |
| TGM3     |   |  |   | 1 |   | 1 | 2 |
| THBD     |   |  | 1 | 1 |   |   | 2 |
| TIE1     |   |  |   | 1 |   | 1 | 2 |
| TIMP2    |   |  | 1 | 1 |   |   | 2 |
| TIMP3    |   |  | 1 | 1 |   |   | 2 |
| TK2      |   |  | 1 | 1 |   |   | 2 |
| TLK2     | 1 |  | 1 |   |   |   | 2 |
| TLN1     |   |  |   | 1 |   | 1 | 2 |
| TLOC1    |   |  | 1 | 1 |   |   | 2 |

|           |   |  |   |   |   |   |   |
|-----------|---|--|---|---|---|---|---|
| TLR9      |   |  |   | 1 |   | 1 | 2 |
| TMEM104   |   |  | 1 | 1 |   |   | 2 |
| TMEM123   |   |  | 1 | 1 |   |   | 2 |
| TMEM141   |   |  |   | 1 | 1 |   | 2 |
| TMEM154   | 1 |  |   | 1 |   |   | 2 |
| TMEM161A  |   |  |   | 1 |   | 1 | 2 |
| TMEM184A  |   |  | 1 | 1 |   |   | 2 |
| TMEM24    |   |  | 1 | 1 |   |   | 2 |
| TMEM34    |   |  | 1 | 1 |   |   | 2 |
| TMEM43    |   |  | 1 | 1 |   |   | 2 |
| TMEM52    |   |  |   | 1 |   | 1 | 2 |
| TMEM92    |   |  |   | 1 | 1 |   | 2 |
| TMTC1     |   |  | 1 | 1 |   |   | 2 |
| TNFAIP1   |   |  | 1 | 1 |   |   | 2 |
| TNFAIP2   |   |  | 1 | 1 |   |   | 2 |
| TNFAIP8L1 |   |  |   |   | 1 | 1 | 2 |
| TNFRSF8   |   |  |   | 1 | 1 |   | 2 |
| TNNI1     |   |  | 1 | 1 |   |   | 2 |
| TNRC6B    |   |  | 1 | 1 |   |   | 2 |
| TOMM22    |   |  | 1 | 1 |   |   | 2 |
| TOMM70A   |   |  | 1 | 1 |   |   | 2 |
| TP53INP2  |   |  | 1 | 1 |   |   | 2 |
| TP73      |   |  |   | 1 |   | 1 | 2 |
| TPPP      |   |  | 1 | 1 |   |   | 2 |
| TRAK1     |   |  | 1 | 1 |   |   | 2 |
| TRH       |   |  |   | 1 |   | 1 | 2 |
| TRIM59    |   |  | 1 | 1 |   |   | 2 |
| TRIM67    |   |  | 1 | 1 |   |   | 2 |
| TRIM68    |   |  | 1 | 1 |   |   | 2 |
| TRIOBP    |   |  | 1 | 1 |   |   | 2 |
| TRIP10    |   |  |   | 1 |   | 1 | 2 |
| TRMT5     |   |  | 1 | 1 |   |   | 2 |
| TSC2      |   |  |   | 1 |   | 1 | 2 |
| TSPAN2    |   |  | 1 | 1 |   |   | 2 |
| TSSC4     |   |  |   | 1 |   | 1 | 2 |
| TTC22     |   |  | 1 | 1 |   |   | 2 |
| TTC9      |   |  |   | 1 | 1 |   | 2 |
| TTC9B     |   |  |   | 1 |   | 1 | 2 |
| TUBB1     |   |  |   | 1 | 1 |   | 2 |
| TUBG2     |   |  |   | 1 |   | 1 | 2 |
| TULP3     |   |  | 1 | 1 |   |   | 2 |



|          |   |  |   |   |   |   |   |
|----------|---|--|---|---|---|---|---|
| UBASH3B  |   |  | 1 | 1 |   |   | 2 |
| UBE2H    |   |  |   | 1 | 1 |   | 2 |
| UBE2J2   |   |  | 1 | 1 |   |   | 2 |
| UBE2Z    | 1 |  |   | 1 |   |   | 2 |
| UBFD1    |   |  | 1 | 1 |   |   | 2 |
| UBOX5    |   |  | 1 | 1 |   |   | 2 |
| UBQLNL   | 1 |  |   | 1 |   |   | 2 |
| UBXD8    |   |  |   | 1 | 1 |   | 2 |
| UCKL1    |   |  |   | 1 |   | 1 | 2 |
| UCN2     |   |  |   | 1 | 1 |   | 2 |
| UHRF1BP1 |   |  | 1 | 1 |   |   | 2 |
| UNC84B   |   |  | 1 | 1 |   |   | 2 |
| UNC93B1  |   |  | 1 | 1 |   |   | 2 |
| UNKL     |   |  | 1 | 1 |   |   | 2 |
| UNQ1887  |   |  | 1 | 1 |   |   | 2 |
| USP20    |   |  | 1 | 1 |   |   | 2 |
| USP32    |   |  | 1 | 1 |   |   | 2 |
| USP6     |   |  | 1 | 1 |   |   | 2 |
| VAMP3    | 1 |  |   | 1 |   |   | 2 |
| VANGL2   |   |  | 1 | 1 |   |   | 2 |
| VDR      |   |  | 1 | 1 |   |   | 2 |
| VENTX    |   |  | 1 | 1 |   |   | 2 |
| VGf      |   |  |   | 1 |   | 1 | 2 |
| VIP      |   |  | 1 | 1 |   |   | 2 |
| VRK3     |   |  |   | 1 |   | 1 | 2 |
| WASF2    |   |  | 1 | 1 |   |   | 2 |
| WDFY1    |   |  | 1 | 1 |   |   | 2 |
| WDFY2    |   |  |   | 1 | 1 |   | 2 |
| WDR26    |   |  | 1 | 1 |   |   | 2 |
| WDR3     |   |  | 1 | 1 |   |   | 2 |
| WDR40B   |   |  | 1 | 1 |   |   | 2 |
| WDR6     |   |  | 1 | 1 |   |   | 2 |
| WHSC2    |   |  |   | 1 |   | 1 | 2 |
| WIPI2    | 1 |  |   | 1 |   |   | 2 |
| WNT1     | 1 |  | 1 |   |   |   | 2 |
| WNT4     |   |  | 1 | 1 |   |   | 2 |
| WSCD1    |   |  | 1 | 1 |   |   | 2 |
| WTIP     |   |  |   | 1 | 1 |   | 2 |
| WWC3     |   |  | 1 | 1 |   |   | 2 |
| YBX2     |   |  |   | 1 |   | 1 | 2 |
| YIPF5    |   |  |   | 1 | 1 |   | 2 |

|         |   |  |   |   |  |   |   |
|---------|---|--|---|---|--|---|---|
| YPEL1   |   |  | 1 | 1 |  |   | 2 |
| YPEL2   |   |  | 1 | 1 |  |   | 2 |
| ZBED4   |   |  | 1 | 1 |  |   | 2 |
| ZBTB3   |   |  | 1 | 1 |  |   | 2 |
| ZBTB46  |   |  |   | 1 |  | 1 | 2 |
| ZC3H11A | 1 |  |   | 1 |  |   | 2 |
| ZC3H3   | 1 |  |   |   |  | 1 | 2 |
| ZC3H6   |   |  | 1 | 1 |  |   | 2 |
| ZCCHC14 |   |  | 1 | 1 |  |   | 2 |
| ZCCHC2  |   |  | 1 | 1 |  |   | 2 |
| ZDHHC16 |   |  |   | 1 |  | 1 | 2 |
| ZDHHC7  |   |  | 1 | 1 |  |   | 2 |
| ZFAND3  |   |  | 1 | 1 |  |   | 2 |
| ZFAND5  |   |  | 1 | 1 |  |   | 2 |
| ZFH3    |   |  | 1 | 1 |  |   | 2 |
| ZFP30   |   |  | 1 | 1 |  |   | 2 |
| ZKSCAN2 |   |  | 1 | 1 |  |   | 2 |
| ZMAT4   |   |  | 1 | 1 |  |   | 2 |
| ZMAT5   |   |  |   | 1 |  | 1 | 2 |
| ZMIZ1   | 1 |  |   | 1 |  |   | 2 |
| ZMYM3   |   |  | 1 | 1 |  |   | 2 |
| ZNF154  |   |  | 1 | 1 |  |   | 2 |
| ZNF2    |   |  | 1 | 1 |  |   | 2 |
| ZNF207  |   |  | 1 | 1 |  |   | 2 |
| ZNF212  |   |  |   | 1 |  | 1 | 2 |
| ZNF260  |   |  | 1 | 1 |  |   | 2 |
| ZNF275  |   |  | 1 | 1 |  |   | 2 |
| ZNF346  | 1 |  |   | 1 |  |   | 2 |
| ZNF362  |   |  | 1 | 1 |  |   | 2 |
| ZNF385B |   |  |   | 1 |  | 1 | 2 |
| ZNF445  |   |  | 1 | 1 |  |   | 2 |
| ZNF511  |   |  |   | 1 |  | 1 | 2 |
| ZNF529  |   |  | 1 | 1 |  |   | 2 |
| ZNF545  |   |  |   | 1 |  | 1 | 2 |
| ZNF607  |   |  | 1 | 1 |  |   | 2 |
| ZNF629  |   |  | 1 | 1 |  |   | 2 |
| ZNF641  |   |  | 1 | 1 |  |   | 2 |
| ZNF660  |   |  | 1 | 1 |  |   | 2 |
| ZNF697  |   |  | 1 | 1 |  |   | 2 |
| ZNF771  |   |  |   | 1 |  | 1 | 2 |
| ZNF784  |   |  | 1 | 1 |  |   | 2 |

|         |  |  |   |   |  |  |   |
|---------|--|--|---|---|--|--|---|
| ZNF81   |  |  | 1 | 1 |  |  | 2 |
| ZNF831  |  |  | 1 | 1 |  |  | 2 |
| ZNRF3   |  |  | 1 | 1 |  |  | 2 |
| ZSCAN29 |  |  | 1 | 1 |  |  | 2 |
| ZSWIM5  |  |  | 1 | 1 |  |  | 2 |

Supl. T.3. Enrichment in top biological functions of predicted targets for svRNA2-1a (Ingenuity Pathway Analysis) by at least 2 different algorithms from the following: miRWalk, miRDB, miRanda, PITA, Targetscan and MirBase.

|                                        | Functions Annotation                      | p-Value  | Transcripts                                                                                                                                                                                                                                                                                |
|----------------------------------------|-------------------------------------------|----------|--------------------------------------------------------------------------------------------------------------------------------------------------------------------------------------------------------------------------------------------------------------------------------------------|
| Cellular Development                   | differentiation of cells                  | 1.45E-04 | ALDH1A2, ATP2B2, BHLHE22, BRSK2, CCDC92, CDH23, CUX1, DAG1, DLX1, EGR2, EMX2, EN1, ERBB2, FGFR3, HTT, ISL1, LBX1, LIF, MECP2, MNX1, NAPA, NEUROG1, NF1, NKX2-2, NOTCH1, NOTCH3, OLIG2, OTX2, POU3F2, PRKCA, S1PR4, STAT3, TBR1, TBX19, TGFA, TGM3, TIMP2, TLX3, TP73, TRH, VGF, VIP, WNT9B |
|                                        | differentiation of neurons                | 2.03E-04 | ALDH1A2, ATP2B2, BHLHE22, BRSK2, CDH23, CUX1, DLX1, EMX2, EN1, FGFR3, HTT, ISL1, LBX1, LIF, MECP2, MNX1, NAPA, NEUROG1, NKX2-2, NOTCH1, NOTCH3, OLIG2, OTX2, POU3F2, PRKCA, S1PR4, TBR1, TGFA, TGM3, TIMP2, TLX3, TP73, VGF, VIP, WNT9B                                                    |
|                                        | commitment of cells                       | 1.40E-03 | DLX1, ISL1, LBX1, NKX2-2, NOTCH1, NOTCH3, OLIG2, OTX2, TLX3                                                                                                                                                                                                                                |
|                                        | developmental process of neurons          | 1.56E-03 | ALDH1A2, ATP2B2, BCL11B, BHLHE22, BRSK2, CDH23, CNP, CUX1, DLX1, EGR2, EMX2, EN1, ERBB2, FGFR3, GHRH, HTR4, HTT, ISL1, LBX1, LIF, MECP2, MNX1, NAPA, NEUROG1, NKX2-2, NOTCH1, NOTCH3, OLIG2, OTX2, POU3F2, PRKCA, RXRA, S1PR4, TBR1, TGFA, TGM3, TIMP2, TLX3, TP73, VGF, VIP, WNT9B        |
|                                        | differentiation of neuroglia              | 2.36E-03 | CCDC92, DAG1, DLX1, EGR2, ERBB2, FGFR3, LIF, NEUROG1, NF1, NKX2-2, NOTCH1, NOTCH3, OLIG2, S1PR4, STAT3, TP73                                                                                                                                                                               |
|                                        | differentiation of oligodendrocytes       | 3.32E-03 | DAG1, DLX1, FGFR3, NEUROG1, NF1, NKX2-2, NOTCH1, OLIG2, TP73                                                                                                                                                                                                                               |
|                                        | developmental process of neuroglia        | 5.83E-03 | CCDC92, DAG1, DLX1, EGR2, EIF2B3, ERBB2, FGFR3, LIF, NEUROG1, NF1, NFKBIA, NKX2-2, NOTCH1, NOTCH3, OLIG2, POU3F2, S1PR4, STAT3, TP73                                                                                                                                                       |
|                                        | specification of neurons                  | 7.40E-03 | DLX1, NKX2-2, OLIG2, TLX3                                                                                                                                                                                                                                                                  |
|                                        | neurogenesis of normal cells              | 7.94E-03 | FGFR3, HTR4, HTT, LIF, NEUROG1, NOTCH1, OTX2                                                                                                                                                                                                                                               |
|                                        | differentiation of astrocytes             | 8.24E-03 | LIF, NEUROG1, NF1, NOTCH1, NOTCH3, OLIG2, S1PR4, STAT3                                                                                                                                                                                                                                     |
|                                        | developmental process of oligodendrocytes | 9.34E-03 | DAG1, DLX1, EIF2B3, FGFR3, LIF, NEUROG1, NF1, NKX2-2, NOTCH1, OLIG2, TP73                                                                                                                                                                                                                  |
| Cell-To-Cell Signaling and Interaction | neurotransmission                         | 1.55E-04 | CACNA1B, CDH2, CHRM1, CHRNA4, CYTH1, DOC2A, EGR3, EPHB2, HTR4, HTT, LEP, NFKBIA, PARK2, SLC8A3, SNCG, SNPH, SSH1, STX1A, VDAC3                                                                                                                                                             |
|                                        | synaptic transmission                     | 3.59E-04 | CDH2, CHRM1, CHRNA4, CYTH1, DOC2A, EGR3, EPHB2, HTR4, HTT, LEP, NFKBIA, SLC8A3, SNCG, SNPH, SSH1, STX1A, VDAC3                                                                                                                                                                             |
|                                        | neurotransmission of synapse              | 5.79E-03 | CHRM1, CHRNA4, EGR3, HTT, PARK2, SLC8A3, SNCG, STX1A, VDAC3                                                                                                                                                                                                                                |
|                                        | neurotransmission of neurons              | 9.47E-03 | CACNA1B, CDH2, CYTH1, DOC2A, HTR4, HTT, LEP, SNPH, SSH1                                                                                                                                                                                                                                    |
|                                        | neurotransmission                         | 1.55E-04 | CACNA1B, CDH2, CHRM1, CHRNA4, CYTH1, DOC2A, EGR3, EPHB2, HTR4, HTT, LEP, NFKBIA, PARK2, SLC8A3, SNCG, SNPH, SSH1, STX1A, VDAC3                                                                                                                                                             |

## Nervous System Development and Function

|                                          |          |                                                                                                                                                                                                                                         |
|------------------------------------------|----------|-----------------------------------------------------------------------------------------------------------------------------------------------------------------------------------------------------------------------------------------|
| differentiation of neurons               | 2.03E-04 | ALDH1A2, ATP2B2, BHLHE22, BRSK2, CDH23, CUX1, DLX1, EMX2, EN1, FGFR3, HTT, ISL1, LBX1, LIF, MECP2, MNX1, NAPA, NEUROG1, NKX2-2, NOTCH1, NOTCH3, OLIG2, OTX2, POU3F2, PRKCA, S1PR4, TBR1, TGFA, TGM3, TIMP2, TLX3, TP73, VGF, VIP, WNT9B |
| synaptic transmission                    | 3.59E-04 | CDH2, CHRM1, CHRNA4, CYTH1, DOC2A, EGR3, EPHB2, HTR4, HTT, LEP, NFKBIA, SLC8A3, SNCG, SNPH, SSH1, STX1A, VDAC3                                                                                                                          |
| formation of neurons                     | 1.47E-03 | NEUROG1, NKX2-2, NOTCH1, OTX2, TBR1, TLX3                                                                                                                                                                                               |
| migration of neurons                     | 1.86E-03 | APBB2, CAMKK2, CDH2, DCX, DLX1, EBF1, EPHB2, ERFF1, GJA1, GNA12, MDGA1, MNX1, NAV1, NEUROG1, NFIX, NRP1, PEX2, PIP5K1C, POU3F2, RAC1, SATB2, SEMA4D, TBR1, TLX3                                                                         |
| differentiation of neuroglia             | 2.36E-03 | CCDC92, DAG1, DLX1, EGR2, ERBB2, FGFR3, LIF, NEUROG1, NF1, NKX2-2, NOTCH1, NOTCH3, OLIG2, S1PR4, STAT3, TP73                                                                                                                            |
| development of cerebellum                | 3.32E-03 | ATP2B2, CCND2, CDKN2A, EN1, FGFR3, LHX5, MECP2, OTX2, SOX4                                                                                                                                                                              |
| differentiation of glial cells           | 3.32E-03 | DAG1, DLX1, FGFR3, NEUROG1, NF1, NKX2-2, NOTCH1, OLIG2, TP73                                                                                                                                                                            |
| development of peripheral nervous system | 4.04E-03 | BAI1, EGR2, EGR3, ERBB2, NF1, NRP1, SOX8                                                                                                                                                                                                |
| neurogenesis                             | 4.26E-03 | DCX, DVL1, FGFR3, HTR4, HTT, IGFBP5, ISL1, LBX1, LIF, NEUROG1, NF1, NFATC2, NFIX, NOTCH1, NOTCH3, NRP1, OLIG2, OTX2, PLXNA3, RAC1, ROBO1, RTN4R, SEMA4D, SEMA5A, SEMA7A, SMAD2, TSC1, TSC2                                              |
| quantity of central nervous system cells | 5.23E-03 | CCND2, EN1, GHRH, IL10, LEP, LHX5, LIF, NF1, RAC1, TGFA, TP73, TSC1, TSC2                                                                                                                                                               |
| development of forebrain                 | 5.73E-03 | ALDH1A2, EMX2, FGFR3, GRLF1, HTT, NDST1, NF1, NOTCH1, NOTCH3, OTX2, ST8SIA2, TP73                                                                                                                                                       |
| neurotransmission of synapse             | 5.79E-03 | CHRM1, CHRNA4, EGR3, HTT, PARK2, SLC8A3, SNCG, STX1A, VDAC3                                                                                                                                                                             |
| development of brain                     | 6.70E-03 | ALDH1A2, EMX2, EN1, FGFR3, GRLF1, HTT, NDST1, NF1, NOTCH1, NOTCH3, OTX2, ST8SIA2, TP73                                                                                                                                                  |
| formation of serotonergic neurons        | 7.34E-03 | NKX2-2, OTX2                                                                                                                                                                                                                            |
| maintenance of radial glial cells        | 7.34E-03 | NOTCH1, STAT3                                                                                                                                                                                                                           |
| proliferation of motor neurons           | 7.34E-03 | ISL1, STAT3                                                                                                                                                                                                                             |
| vacuolation of myelin sheath             | 7.34E-03 | GJB1, GJC2                                                                                                                                                                                                                              |
| specification of neurons                 | 7.40E-03 | DLX1, NKX2-2, OLIG2, TLX3                                                                                                                                                                                                               |
| neurogenesis of normal cells             | 7.94E-03 | FGFR3, HTR4, HTT, LIF, NEUROG1, NOTCH1, OTX2                                                                                                                                                                                            |
| differentiation of astrocytes            | 8.24E-03 | LIF, NEUROG1, NF1, NOTCH1, NOTCH3, OLIG2, S1PR4, STAT3                                                                                                                                                                                  |

|                      |                                         |          |                                                                                                                                                                          |
|----------------------|-----------------------------------------|----------|--------------------------------------------------------------------------------------------------------------------------------------------------------------------------|
|                      | quantity of neurons                     | 9.46E-03 | ATM, CCND2, CX3CL1, DLX1, EGR2, EN1, ERBB2, HTR4, HTT, IL10, LBX1, LEP, MECP2, NEUROG1, NOTCH1, OLIG2, PARK2, SHC2, TBR1, TFAP2A, TGFA, TP73                             |
|                      | neurotransmission of neurons            | 9.47E-03 | CACNA1B, CDH2, CYTH1, DOC2A, HTR4, HTT, LEP, SNPH, SSH1                                                                                                                  |
|                      | development of nervous system           | 9.96E-03 | ALDH1A2, BAI1, DCX, EGR2, EGR3, EMX2, EN1, ERBB2, EVL, FGFR3, GRLF1, HTT, LATS2, NDST1, NF1, NOTCH1, NOTCH3, NPTX1, NRP1, OTX2, PARK2, SH3GL1, SOX8, ST8SIA2, TLX3, TP73 |
| Neurological Disease | demyelination of nervous tissue         | 5.50E-03 | DAG1, IKBKG, ITGB4                                                                                                                                                       |
|                      | demyelination of sciatic nerve          | 7.34E-03 | DAG1, ITGB4                                                                                                                                                              |
|                      | neurological disorder of nervous tissue | 2.05E-02 | DAG1, HTT, IKBKG, ITGB4                                                                                                                                                  |
|                      | tauopathy                               | 2.13E-02 | CD74, CDKN2A, CNP, DCX, GABBR2, HTR6, ICAM1, LDLR, MFN2, NFATC2, NOS3, PRKCA, RTN4R, SCN1B, STAT3, STUB1, TAGLN, TIMP3, TP73                                             |

Reference set: Ingenuity Knowledge Base (Genes Only) Relationship to include: Direct and Indirect Includes Endogenous Chemicals Optional Analyses: My Pathways My List  
Filter Summary: Consider only molecules and/or relationships where (species = Human OR Rat OR Mouse) AND (confidence = Experimentally Observed OR High (predicted)) AND (tissues = Olfactory Bulb OR Nervous System not otherwise specified OR Hypothalamus OR Hippocampus OR Cerebral Cortex OR Other Nervous System OR Amygdala OR Cerebellum OR Pituitary Gland OR Substantia Nigra OR Dorsal Root Ganglion) AND (data sources = BIND OR BIOGRID OR ClinicalTrials.gov OR Cognia OR DIP OR Gene Ontology (GO) OR GVK Biosciences OR Ingenuity Expert Findings OR Ingenuity ExpertAssist Findings OR INTACT OR Interactome studies OR Kyoto Encyclopedia of Genes and Genomes (KEGG) OR MINT OR MIPS OR Obesity Gene Map Database OR TarBase OR TargetScan Human)









Supl. T.4. Enrichment in top biological functions of deregulated transcripts upon svRNA2-1a overexpression (Ingenuity Pathway Analysis)

|                                            | Functions Annotation               | p-Value  | Transcripts                                      |
|--------------------------------------------|------------------------------------|----------|--------------------------------------------------|
| Neurological Disease                       | movement disorder                  | 8.85E-05 | ATN1, SNCB, <b>SOX4</b> , SPARCL1                |
|                                            | ataxia of mice                     | 2.34E-04 | ATN1, SOX4                                       |
|                                            | neurological disorder              | 1.73E-03 | ATN1, ATP1A3, SNCB, <b>SOX4</b> , SPARCL1, TXNIP |
|                                            | schizophrenia                      | 4.46E-03 | ATP1A3, SNCB, TXNIP                              |
|                                            | hydrocephalus of mice              | 6.37E-03 | SOX4                                             |
|                                            | Parkinson's disease                | 1.23E-02 | SNCB, SPARCL1                                    |
|                                            | tremor of mice                     | 1.27E-02 | ATN1                                             |
| Nervous System Development and Function    | differentiation of V2 interneurons | 2.13E-03 | LHX3                                             |
|                                            | motor function of mice             | 1.90E-02 | ATN1                                             |
|                                            | quantity of nerve ending           | 2.32E-02 | SNCB                                             |
|                                            | guidance of motor axons            | 3.15E-02 | LHX3                                             |
|                                            | proliferation of oligodendrocytes  | 3.35E-02 | <b>SOX4</b>                                      |
| DNA Replication, Recombination, and Repair | formation of nuclear foci          | 2.13E-03 | ATN1                                             |
|                                            | formation of nuclear foci          | 2.13E-03 | ATN1                                             |

|                                      |                             |          |      |
|--------------------------------------|-----------------------------|----------|------|
| Cellular<br>Assembly<br>Organization | size of gap<br>junctions    | 6.37E-03 | SNCB |
|                                      | quantity of nerve<br>ending | 2.32E-02 | SNCB |

In bold green deregulated transcripts with predicted sites in the 3UTR by at least 2 algorithms.

Reference set: Ingenuity Knowledge Base (Genes Only) Relationship to include: Direct and Indirect Includes Endogenous Chemicals Optional Analyses: My Pathways My List  
Filter Summary: Consider only molecules and/or relationships where (species = Human OR Rat OR Mouse) AND (confidence = Experimentally Observed OR High (predicted)) AND (tissues = Olfactory Bulb OR Nervous System not otherwise specified OR Hypothalamus OR Hippocampus OR Cerebral Cortex OR Other Nervous System OR Amygdala OR Cerebellum OR Pituitary Gland OR Substantia Nigra OR Dorsal Root Ganglion) AND (data sources = BIND OR BIOGRID OR ClinicalTrials.gov OR Cognition OR DIP OR Gene Ontology (GO) OR GVK Biosciences OR Ingenuity Expert Findings OR Ingenuity ExpertAssist Findings OR INTACT OR Interactome studies OR Kyoto Encyclopedia of Genes and Genomes (KEGG) OR MINT OR MIPS OR Obesity Gene Map Database OR TarBase OR TargetScan Human)

Supl.T.5. Taqman rRT-PCR assays

| <b>sncRNA</b>         | <b>miRNA assay ID</b>  |
|-----------------------|------------------------|
| <b>hsa-miR-886-5p</b> | 002193                 |
| <b>hsa-miR-16</b>     | 000391                 |
| <b>RNU58B</b>         | 001206                 |
| <b>RNU6B</b>          | 001093                 |
| <b>GeneName</b>       | <b>taqman assay ID</b> |
| <b>ATRN</b>           | Hs00201343_m1*         |
| <b>MAGI2</b>          | Hs00202321_m1*         |
| <b>PPP1R9A</b>        | Hs01044144_m1*         |
| <b>SPARCL1</b>        | Hs00949886_m1*         |
| <b>ST3GAL6</b>        | Hs00196086_m1*         |
| <b>SYT14</b>          | Hs00542044_m1*         |
| <b>TXNIP</b>          | Hs00197750_m1*         |
| <b>DHX40</b>          | Hs00226332_m1*         |
| <b>SFRS6</b>          | Hs00740177_g1*         |
| <b>MIB1</b>           | Hs00379185_m1*         |
| <b>SOX4</b>           | Hs00268388_s1*         |
| <b>ATP1A3</b>         | Hs00265163_m1*         |
| <b>ATP13A2</b>        | Hs00223032_m1*         |
| <b>ATXN2L</b>         | Hs00387643_m1*         |
| <b>CRTC1</b>          | Hs00257715_m1*         |
| <b>LHX3</b>           | Hs01033412_m1*         |
| <b>LYNX1</b>          | Hs00418164_m1*         |
| <b>NOTCH4</b>         | Hs00965889_m1*         |
| <b>NPB</b>            | Hs00752127_s1*         |
| <b>SNCB</b>           | Hs00608185_m1*         |
| <b>VAMP2</b>          | Hs00360269_m1*         |
| <b>POLR2J</b>         | Hs00196523_m1          |
| <b>GAPDH</b>          | Hs03929097_g1          |
| <b>ACTB</b>           | Hs99999903_m1*         |
| <b>RPL13A</b>         | Hs01926559_g1*         |
| <b>GUSB</b>           | Hs00939627_m1*         |
| <b>M-RIP</b>          | Hs00819388_m1*         |
| <b>POLR2F</b>         | Hs00222679_m1*         |
| <b>B2M</b>            | Hs99999907_m1          |

Supl.T.6. miRNA mimics and siRNAs

| miRNA mimics                  | mature target sequence 5' - 3' | Manufacturer                     | reference | nM |
|-------------------------------|--------------------------------|----------------------------------|-----------|----|
| hsa-miR-886-5p<br>(svRNA2-1a) | CGGGUCGGAGUUAGCUCAAGCGG        | Pre-miR miRNA precursor (Ambion) | PM12256   | 5  |
| scrambled control             | NOT AVAILABLE                  | Pre-miR miRNA precursor (Ambion) | AM17100   | 5  |

| siRNAs      | sequence 5' - 3'           | Manufacturer | reference | nM  |
|-------------|----------------------------|--------------|-----------|-----|
| Dicer       | GCUCGAAAUCUUACGCAAUA dtdt  | Dharmacon    | custom    | 100 |
| Drosha      | AACGAGUAGGCUUCGUGACUU dtdt | Dharmacon    | custom    | 100 |
| scrambled 1 | GCGACGUUCCUGAAACCAC dtdt   | Dharmacon    | custom    | 100 |
| scrambled 2 | CGUUACCGCGGAAUACUUCGA dtdt | Dharmacon    | custom    | 100 |

nM concentration
